# Supplementary material for: Global analysis of protein lysine lactylation profiles in the marine bacterium Photobacterium damselae subsp. damselae
Source: Front Microbiol. 2025 Jun 17;16:1539893. doi: 10.3389/fmicb.2025.1539893 (PMC12209183; doi:10.3389/fmicb.2025.1539893)
Supplement: Supplementary file 4 [file Table_3.xlsx]

## Sheet: Classify list
Table S3. Distribution of subcellular localization of Klac-modified proteins in P. damselae
Subcellular localization	Protein accession	Position	Amino acid	Protein description	Gene name	Charge	Mass error [ppm]	MS/MS Count	Modified sequence	Localization prob Exp1	PEP Exp1	Score Exp1	Localization prob Exp2	PEP Exp2	Score Exp2	Localization prob Exp3	PEP Exp3	Score Exp3	Number of repeat
Cytoplasmic	KFZ67_00020	300	K	DNA gyrase subunit B OS=Photobacterium damselae OX=38293 GN=gyrB PE=3 SV=1	gyrB	2	-0.59254	3	TLNNYMEK(1)EGYSK	1	0.00106959	57.034	1	0.00603101	40.941	1	0.00106959	57.034	3
	KFZ67_01775	41	K	50S ribosomal protein L13 OS=Photobacterium damsela subsp. piscicida OX=38294 GN=rplM PE=3 SV=1	rplM	4	-0.78799	6	HK(1)PEYTPHVDTGDYIVVINAEK	1	2.78986e-16	94.384	1	1.92565e-11	84.324	1	2.78986e-16	94.384	3
	KFZ67_01775	39	K	50S ribosomal protein L13 OS=Photobacterium damsela subsp. piscicida OX=38294 GN=rplM PE=3 SV=1	rplM	5	0.37919	6	GK(0.838)HK(0.162)PEYTPHVDTGDYIVVINAEK	0.837836	7.30114e-24	103.84	0.780723	1.66375e-16	94.019	0.837836	7.30114e-24	103.84	3
	KFZ67_01680	33	K	Ribosomal subunit interface protein OS=Photobacterium damselae OX=38293 GN=yhbH PE=4 SV=1	yhbH	4	-0.41494	6	FFDK(1)INHIHVILNVEK	1	8.36332e-05	56.768	1	0.000146149	52.862	1	8.36332e-05	56.768	3
	KFZ67_01680	23	K	Ribosomal subunit interface protein OS=Photobacterium damselae OX=38293 GN=yhbH PE=4 SV=1	yhbH	2	-1.1762	3	EYVTTK(1)FDK	1	0.00407633	63.426	1	0.0075617	57.267	1	0.00407633	63.426	3
	KFZ67_13750	249	K	Elongation factor Tu OS=Photobacterium damsela subsp. piscicida OX=38294 GN=tuf PE=3 SV=1	tuf	3	-0.44663	2	VEQGIITVGDEVEIVGIK(1)PTTK	1	1.22802e-10	77.576	1	1.22802e-10	77.576	1	7.78628e-07	61.039	3
	KFZ67_13750	38	K	Elongation factor Tu OS=Photobacterium damsela subsp. piscicida OX=38294 GN=tuf PE=3 SV=1	tuf	3	-0.79615	5	TTLTAAICTVLAK(1)VYGGAAR	1	1.47306e-22	119.62	1	1.47306e-22	119.62	1	5.47766e-22	112.01	3
	KFZ67_13750	25	K	Elongation factor Tu OS=Photobacterium damsela subsp. piscicida OX=38294 GN=tuf PE=3 SV=1	tuf	5	0.12422	8	TK(0.009)PHVNVGTIGHVDHGK(0.991)TTLTAAICTVLAK	0.991449	2.05636e-09	63.73	0.987221	9.19714e-09	60.829	0.991449	2.05636e-09	63.73	3
	KFZ67_13750	10	K	Elongation factor Tu OS=Photobacterium damsela subsp. piscicida OX=38294 GN=tuf PE=3 SV=1	tuf	4	-1.6621	3	TK(1)PHVNVGTIGHVDHGK	1	1.98855e-05	59.372	1	0.000960459	43.208	1	1.98855e-05	59.372	3
	KFZ67_13750	253	K	Elongation factor Tu OS=Photobacterium damsela subsp. piscicida OX=38294 GN=tuf PE=3 SV=1	tuf	2	-0.80511	14	PTTK(1)TTCTGVEMFR	1	7.17102e-47	139.86	1	6.54084e-27	132.31	1	7.17102e-47	139.86	3
	KFZ67_13750	90	K	Elongation factor Tu OS=Photobacterium damsela subsp. piscicida OX=38294 GN=tuf PE=3 SV=1	tuf	5	-0.33939	7	HYAHVDCPGHADYVK(1)NMITGAAQMDGGILVVAATDGPMPQTR	1	1.08272e-57	131.99	1	1.08272e-57	131.99	1	3.67912e-57	125.48	3
	KFZ67_13750	325	K	Elongation factor Tu OS=Photobacterium damsela subsp. piscicida OX=38294 GN=tuf PE=3 SV=1	tuf	4	-0.183	7	HTPFFK(1)GYRPQFYFR	1	2.20514e-08	94.688	1	5.32779e-08	87.568	1	2.20514e-08	94.688	3
	KFZ67_13750	209	K	Elongation factor Tu OS=Photobacterium damsela subsp. piscicida OX=38294 GN=tuf PE=3 SV=1	tuf	3	1.2216	5	AIDK(1)PFILPIEDVFSIQGR	1	2.48942e-21	110.37	1	2.48942e-21	110.37	1	3.40975e-16	106.31	3
	KFZ67_00840	11	K	Triosephosphate isomerase OS=Photobacterium damselae OX=38293 GN=tpiA PE=3 SV=1	tpiA	2	1.236	7	HPVVMGNWK(1)LNGSK	1	4.98702e-13	116.63	1	8.79917e-05	73.415	1	4.98702e-13	116.63	3
	KFZ67_01775	61	K	50S ribosomal protein L13 OS=Photobacterium damsela subsp. piscicida OX=38294 GN=rplM PE=3 SV=1	rplM	4	-0.54448	5	HKPEYTPHVDTGDYIVVINAEK(1)VAVTGAK	1	3.1406e-13	81.532	1	8.88416e-10	71.903	1	3.1406e-13	81.532	3
	KFZ67_00835	215	K	ATP-dependent 6-phosphofructokinase OS=Photobacterium damselae OX=38293 GN=pfkA PE=3 SV=1	pfkA	3	1.7226	3	K(1)HAIIAITELMTDVNELAK	1	2.59634e-12	94.281	1	8.68522e-12	85.937	1	2.59634e-12	94.281	3
	KFZ67_00790	5	K	2,3-bisphosphoglycerate-independent phosphoglycerate mutase OS=Photobacterium damselae OX=38293 GN=gpmI PE=3 SV=1	gpmI	3	0.59951	3	K(1)PLALVILDGWGYR	1	7.4024e-10	98.337	1	7.4024e-10	98.337	1	4.98505e-05	76.868	3
	KFZ67_00790	85	K	2,3-bisphosphoglycerate-independent phosphoglycerate mutase OS=Photobacterium damselae OX=38293 GN=gpmI PE=3 SV=1	gpmI	3	1.0038	4	ITK(1)AISDGEFFENDVLVAAMDAAIK	1	1.0874e-07	69.284	1	1.0874e-07	69.284	1	3.09664e-05	51.966	3
	KFZ67_00670	25	K	50S ribosomal protein L33 OS=Vibrio ruber DSM 16370 OX=1123498 GN=rpmG PE=3 SV=1	rpmG	3	-0.066758	3	LVSSAGTGHFYTTDK(0.946)NK(0.054)R	0.945992	2.46985e-09	77.221	0.558873	8.12429e-07	66.977	0.945992	2.46985e-09	77.221	3
	KFZ67_00670	38	K	50S ribosomal protein L33 OS=Vibrio ruber DSM 16370 OX=1123498 GN=rpmG PE=3 SV=1	rpmG	2	-0.33531	6	K(1)FDPVVR	1	7.98797e-07	120.49	1	3.60734e-06	113.7	1	7.98797e-07	120.49	3
	KFZ67_00625	3	K	Guanylate kinase OS=Photobacterium damselae OX=38293 GN=gmk PE=3 SV=1	gmk	2	1.0257	3	SK(1)GTLYIVSAPSGAGK	1	1.11401e-05	68.189	1	1.11401e-05	68.189	1	8.1127e-05	58.246	3
	KFZ67_00580	41	K	RNA-binding transcriptional accessory protein OS=Photobacterium damselae OX=38293 GN=BST98_00585 PE=4 SV=1	BST98_00585	2	1.9625	4	K(1)EVTGGLDDTQLR	1	0.000260987	70.889	1	0.00119262	54.09	1	0.000260987	70.889	3
	KFZ67_00560	100	K	Fe/S biogenesis protein NfuA OS=Photobacterium damselae OX=38293 GN=nfuA PE=3 SV=1	nfuA	2	-0.40167	7	K(1)VADDAPLMER	1	5.65474e-14	132.32	1	5.25024e-10	121.02	1	5.65474e-14	132.32	3
	KFZ67_00470	234	K	Glycerol-3-phosphate dehydrogenase OS=Photobacterium damselae subsp. damselae OX=85581 GN=glpD PE=3 SV=1	glpD	3	2.9596	3	LIK(1)GSHIVVPR	1	0.00177254	58.132	1	0.00348833	50.275	1	0.00177254	58.132	3
	KFZ67_00385	211	K	Hca operon transcriptional activator OS=Photobacterium damselae OX=38293 GN=hcaR_1 PE=3 SV=1	hcaR_1	4	3.6888	2	AEHK(1)TQVMHLVQAGLGISFLPTGVLETAK	1	5.78333e-07	53.522	1	7.83269e-07	50.865	1	5.78333e-07	53.522	3
	KFZ67_02295	263	K	Glutathione synthetase OS=Photobacterium damselae OX=38293 GN=gshB_1 PE=3 SV=1	gshB_1	2	-0.93409	3	IAEAVAPTLK(1)EK	1	0.000193426	77.185	1	0.00182875	57.106	1	0.000193426	77.185	3
	KFZ67_02315	354	K	S-adenosylmethionine synthase OS=Photobacterium damselae OX=38293 GN=metK PE=3 SV=1	metK	2	-0.95916	4	K(1)TAAYGHFGR	1	3.74223e-06	108.93	1	3.74223e-06	108.93	1	2.13595e-05	103.01	3
	KFZ67_02315	246	K	S-adenosylmethionine synthase OS=Photobacterium damselae OX=38293 GN=metK PE=3 SV=1	metK	2	-0.15478	7	K(1)IIVDTYGGAAR	1	2.39422e-14	132.17	1	2.39422e-14	132.17	1	8.24414e-14	125.97	3
	KFZ67_02315	222	K	S-adenosylmethionine synthase OS=Photobacterium damselae OX=38293 GN=metK PE=3 SV=1	metK	2	0.10815	2	DTK(1)YFINPTGR	1	0.00134434	63.473	1	0.00333928	55.188	1	0.00134434	63.473	3
	KFZ67_00790	480	K	2,3-bisphosphoglycerate-independent phosphoglycerate mutase OS=Photobacterium damselae OX=38293 GN=gpmI PE=3 SV=1	gpmI	2	1.5935	4	SLTLK(1)DNGK	1	4.4525e-24	148.52	1	4.99976e-24	147.2	1	4.4525e-24	148.52	3
	KFZ67_02330	5	K	Phosphoglycerate kinase OS=Photobacterium damsela subsp. piscicida OX=38294 GN=pgk PE=3 SV=1	pgk	2	1.8353	13	SVIK(1)MTDLDLAGK	1	0.000249755	71.879	1	0.000249755	71.879	1	0.000265057	71.513	3
	KFZ67_01775	111	K	50S ribosomal protein L13 OS=Photobacterium damsela subsp. piscicida OX=38294 GN=rplM PE=3 SV=1	rplM	2	-0.55629	8	GMLPK(1)GPLGR	1	1.30927e-05	104.2	1	0.000104567	94.309	1	1.30927e-05	104.2	3
	KFZ67_01775	72	K	50S ribosomal protein L13 OS=Photobacterium damsela subsp. piscicida OX=38294 GN=rplM PE=3 SV=1	rplM	4	-0.28521	6	TDK(1)MYHHHTGYIGGLK	1	1.39443e-12	104.21	1	1.18107e-05	65.038	1	1.39443e-12	104.21	3
	KFZ67_01985	152	K	Dihydrolipoyl dehydrogenase OS=Photobacterium damselae OX=38293 GN=lpdA PE=3 SV=1	lpdA	3	-0.61856	2	PIK(1)LPFIPHEDPR	1	0.000130685	73.927	1	0.000391848	65.043	1	0.000130685	73.927	3
	KFZ67_01985	285	K	Dihydrolipoyl dehydrogenase OS=Photobacterium damselae OX=38293 GN=lpdA PE=3 SV=1	lpdA	2	0.00077076	3	LLDAEK(1)AGIEVDER	1	1.16173e-06	87.519	1	1.16173e-06	87.519	1	1.50465e-05	83.633	3
	KFZ67_01985	300	K	Dihydrolipoyl dehydrogenase OS=Photobacterium damselae OX=38293 GN=lpdA PE=3 SV=1	lpdA	2	-0.61459	7	GFIHVDK(1)QMR	1	1.1894e-07	114.97	1	0.000187872	89.679	1	1.1894e-07	114.97	3
	KFZ67_01985	256	K	Dihydrolipoyl dehydrogenase OS=Photobacterium damselae OX=38293 GN=lpdA PE=3 SV=1	lpdA	2	0.49886	3	EDGIYVSMEGK(1)K	1	0.000201095	75.739	1	0.000201095	75.739	1	0.00026044	73.082	3
	KFZ67_01980	351	K	Acetyltransferase component of pyruvate dehydrogenase complex OS=Photobacterium damselae subsp. damselae OX=85581 GN=aceF PE=3 SV=1	aceF	2	0.33202	3	ILK(1)EDVQNFVK	1	2.46783e-09	116.55	1	2.46783e-09	116.55	1	2.87648e-09	115.57	3
	KFZ67_01980	339	K	Acetyltransferase component of pyruvate dehydrogenase complex OS=Photobacterium damselae subsp. damselae OX=85581 GN=aceF PE=3 SV=1	aceF	2	1.0038	3	EFGVNLAK(1)VK	1	0.000550774	79.148	1	0.000550774	79.148	1	0.00134743	68.657	3
	KFZ67_01975	872	K	Pyruvate dehydrogenase E1 component OS=Photobacterium damselae subsp. damselae OX=85581 GN=aceE PE=4 SV=1	aceE	2	1.5299	6	SVVADAIK(1)K	1	0.00364803	63.397	1	0.00393358	61.78	1	0.00364803	63.397	3
	KFZ67_01975	377	K	Pyruvate dehydrogenase E1 component OS=Photobacterium damselae subsp. damselae OX=85581 GN=aceE PE=4 SV=1	aceE	2	-4.3321	3	LFAAFNNAK(1)ETQGK	1	6.94686e-05	81.904	1	6.94686e-05	76.01	1	7.7979e-05	81.904	3
	KFZ67_01975	411	K	Pyruvate dehydrogenase E1 component OS=Photobacterium damselae subsp. damselae OX=85581 GN=aceE PE=4 SV=1	aceE	4	-2.3066	7	K(1)MDMTHVQHLR	1	4.7509e-06	108.7	1	0.00011672	79.659	1	4.7509e-06	108.7	3
	KFZ67_01975	509	K	Pyruvate dehydrogenase E1 component OS=Photobacterium damselae subsp. damselae OX=85581 GN=aceE PE=4 SV=1	aceE	2	0.1758	4	ILNILLK(1)DK	1	0.000680928	85.355	1	0.00194444	74.841	1	0.000680928	85.355	3
	KFZ67_01975	392	K	Pyruvate dehydrogenase E1 component OS=Photobacterium damselae subsp. damselae OX=85581 GN=aceE PE=4 SV=1	aceE	2	0.54867	9	TIK(1)GYGMGDAAEGK	1	1.16173e-06	87.519	1	5.03359e-05	78.69	1	1.16173e-06	87.519	3
	KFZ67_01975	389	K	Pyruvate dehydrogenase E1 component OS=Photobacterium damselae subsp. damselae OX=85581 GN=aceE PE=4 SV=1	aceE	2	0.039841	4	ETQGKPTVILAK(1)TIK	0.999998	0.000260164	65.231	0.999975	0.00226635	54.764	0.999998	0.000260164	65.231	3
	KFZ67_01975	360	K	Pyruvate dehydrogenase E1 component OS=Photobacterium damselae subsp. damselae OX=85581 GN=aceE PE=4 SV=1	aceE	3	-1.3058	4	YPETAALVADMTDDEIFALK(1)R	1	3.65445e-07	68.952	1	9.00136e-07	62.648	1	3.65445e-07	68.952	3
	KFZ67_01775	96	K	50S ribosomal protein L13 OS=Photobacterium damsela subsp. piscicida OX=38294 GN=rplM PE=3 SV=1	rplM	2	-1.7538	3	K(1)PEMVIEIAVK	1	1.40192e-05	96.059	1	0.000171408	84.297	1	1.40192e-05	96.059	3
	KFZ67_01975	466	K	Pyruvate dehydrogenase E1 component OS=Photobacterium damselae subsp. damselae OX=85581 GN=aceE PE=4 SV=1	aceE	3	-0.23359	3	DALHGYTPK(1)R	1	9.94784e-05	93.096	1	0.00140899	64.82	1	9.94784e-05	93.096	3
	KFZ67_01920	536	K	Protein translocase subunit SecA OS=Photobacterium damselae subsp. damselae OX=85581 GN=secA PE=3 SV=1	secA	2	-0.71884	2	LENPTDEQIAK(1)LK	1	0.00041553	67.997	1	0.00041553	67.997	1	0.00154727	51.726	3
	KFZ67_01905	351	K	Cell division protein FtsZ OS=Photobacterium damselae OX=38293 GN=ftsZ PE=3 SV=1	ftsZ	3	0.08716	4	PAQTAAPVVEEK(1)PAVEGQAAAQK	1	8.05747e-08	71.651	1	8.05747e-08	71.651	1	5.65823e-07	61.963	3
	KFZ67_01905	168	K	Cell division protein FtsZ OS=Photobacterium damselae OX=38293 GN=ftsZ PE=3 SV=1	ftsZ	3	-0.5166	2	HVDSLITIPNEK(1)LLK	1	7.85357e-08	85.45	1	1.30676e-06	81.904	1	7.85357e-08	85.45	3
	KFZ67_01905	191	K	Cell division protein FtsZ OS=Photobacterium damselae OX=38293 GN=ftsZ PE=3 SV=1	ftsZ	3	3.1188	3	ANDVLK(1)NAVQGIAELITR	1	2.74139e-21	114.99	1	2.74139e-21	114.99	1	1.60965e-15	100.02	3
	KFZ67_01890	11	K	UDP-N-acetylmuramate--L-alanine ligase OS=Photobacterium damselae OX=38293 GN=murC PE=3 SV=1	murC	2	1.8253	3	LDNQQLAK(1)IR	1	2.93082e-05	101.38	1	2.93082e-05	101.38	1	0.000337891	83.869	3
	KFZ67_01835	261	K	Ribosomal RNA small subunit methyltransferase I OS=Photobacterium damselae OX=38293 GN=rsmI PE=3 SV=1	rsmI	3	0.1609	3	K(1)ASALAAEIHNVK	1	1.74255e-12	110.9	1	1.74255e-12	110.9	1	9.68249e-05	77.696	3
	KFZ67_01775	91	K	50S ribosomal protein L13 OS=Photobacterium damsela subsp. piscicida OX=38294 GN=rplM PE=3 SV=1	rplM	2	-0.60148	3	SISFEK(1)LIAK	1	0.000136426	92.538	1	0.000410406	82.261	1	0.000136426	92.538	3
	KFZ67_01775	12	K	50S ribosomal protein L13 OS=Photobacterium damsela subsp. piscicida OX=38294 GN=rplM PE=3 SV=1	rplM	3	0.52794	4	TFVAKPETVK(1)R	1	2.08921e-10	121.9	1	1.57952e-05	88.596	1	2.08921e-10	121.9	3
	KFZ67_01775	7	K	50S ribosomal protein L13 OS=Photobacterium damsela subsp. piscicida OX=38294 GN=rplM PE=3 SV=1	rplM	2	-0.24446	8	TFVAK(1)PETVK	1	0.00114186	70.438	1	0.00165364	66.004	1	0.00114186	70.438	3
	KFZ67_01775	2	K	50S ribosomal protein L13 OS=Photobacterium damsela subsp. piscicida OX=38294 GN=rplM PE=3 SV=1	rplM	2	0.11421	10	MK(1)TFVAKPETVK	1	4.88181e-06	101.38	1	4.88181e-06	101.38	1	6.95969e-05	87.831	3
	KFZ67_01775	138	K	50S ribosomal protein L13 OS=Photobacterium damsela subsp. piscicida OX=38294 GN=rplM PE=3 SV=1	rplM	3	-0.17272	2	VYAGTEHNHAAQQPK(1)VLDI	1	1.03151e-06	62.203	1	1.03151e-06	62.203	1	0.000592381	44.831	3
	KFZ67_01775	123	K	50S ribosomal protein L13 OS=Photobacterium damsela subsp. piscicida OX=38294 GN=rplM PE=3 SV=1	rplM	4	-1.2347	2	LK(1)VYAGTEHNHAAQQPK	1	6.30275e-07	74.296	1	6.30275e-07	74.296	1	0.000114742	48.899	3
	KFZ67_01775	85	K	50S ribosomal protein L13 OS=Photobacterium damsela subsp. piscicida OX=38294 GN=rplM PE=3 SV=1	rplM	3	-1.7873	4	MYHHHTGYIGGLK(1)SISFEK	1	5.58702e-16	103.87	1	7.89515e-16	101.28	1	5.58702e-16	103.87	3
	KFZ67_01920	8	K	Protein translocase subunit SecA OS=Photobacterium damselae subsp. damselae OX=85581 GN=secA PE=3 SV=1	secA	2	0.20915	3	LLTK(1)IIGSR	1	0.000298226	93.325	1	0.00270121	70.389	1	0.000298226	93.325	3
	KFZ67_01985	279	K	Dihydrolipoyl dehydrogenase OS=Photobacterium damselae OX=38293 GN=lpdA PE=3 SV=1	lpdA	2	-0.014866	6	VPNGK(1)LLDAEK	1	7.26591e-06	94.402	1	7.26591e-06	94.402	1	6.00796e-05	84.169	3
	KFZ67_02330	197	K	Phosphoglycerate kinase OS=Photobacterium damsela subsp. piscicida OX=38294 GN=pgk PE=3 SV=1	pgk	2	-1.0685	3	VSTK(1)LTVLESLSK	1	0.000130554	77.204	1	0.0004135	68.044	1	0.000130554	77.204	3
	KFZ67_02330	14	K	Phosphoglycerate kinase OS=Photobacterium damsela subsp. piscicida OX=38294 GN=pgk PE=3 SV=1	pgk	2	0.018359	19	MTDLDLAGK(1)R	1	2.85585e-45	179.1	1	2.85585e-45	179.1	1	1.47692e-24	153.97	3
	KFZ67_02335	84	K	Fructose-bisphosphate aldolase OS=Photobacterium damselae OX=38293 GN=fbaA PE=3 SV=1	fbaA	2	0.40311	5	LEGQEAQIK(1)GAVAGAK	1	9.57618e-09	94.487	1	9.57618e-09	94.487	1	2.26457e-08	89.911	3
	KFZ67_02335	325	K	Fructose-bisphosphate aldolase OS=Photobacterium damselae OX=38293 GN=fbaA PE=3 SV=1	fbaA	3	-0.39934	10	KFEAENHDYLQGQIGNPTGPDAPNK(1)K	1	1.11269e-42	130.98	1	9.16463e-33	114.75	1	1.11269e-42	130.98	3
	KFZ67_02335	29	K	Fructose-bisphosphate aldolase OS=Photobacterium damselae OX=38293 GN=fbaA PE=3 SV=1	fbaA	3	-1.3666	2	ENK(1)FALPAVNVVNTDTINGVLEAAAK	1	1.71893e-11	80.02	1	1.71893e-11	80.02	1	1.01532e-07	67.496	3
	KFZ67_02335	75	K	Fructose-bisphosphate aldolase OS=Photobacterium damselae OX=38293 GN=fbaA PE=3 SV=1	fbaA	2	1.6554	6	GLK(1)LEGQEAQIK	1	8.87281e-06	87.719	1	0.00424577	63.091	1	8.87281e-06	87.719	3
	KFZ67_02335	72	K	Fructose-bisphosphate aldolase OS=Photobacterium damselae OX=38293 GN=fbaA PE=3 SV=1	fbaA	3	2.129	2	APVIVQFSNGGAAFFAGK(1)GLK	1	9.91832e-36	133.94	1	3.94466e-35	131.67	1	9.91832e-36	133.94	3
	KFZ67_03710	111	K	Ribose-phosphate pyrophosphokinase OS=Photobacterium damselae OX=38293 GN=prs PE=3 SV=1	prs	3	-1.0229	4	VPITAK(1)VVADFLSNVGVDR	1	5.99068e-16	103.41	1	5.99068e-16	103.41	1	6.72431e-16	102.59	3
	KFZ67_03700	303	K	Ribosome-binding ATPase YchF OS=Photobacterium damsela subsp. piscicida OX=38294 GN=ychF PE=3 SV=1	ychF	3	3.0654	3	AWTIPVGATAPK(1)AAGVIHTDFEK	1	1.50709e-05	58.373	1	0.000101385	48.077	1	1.50709e-05	58.373	3
	KFZ67_03540	58	K	tRNA-2-methylthio-N(6)-dimethylallyladenosine synthase OS=Photobacterium damselae OX=38293 GN=miaB PE=3 SV=1	miaB	2	0.8912	2	AQEK(1)VFHQLGR	1	1.87989e-05	87.184	1	0.000953215	67.385	1	1.87989e-05	87.184	3
	KFZ67_03505	146	K	Leucine--tRNA ligase OS=Photobacterium damselae OX=38293 GN=leuS PE=3 SV=1	leuS	2	3.2568	3	LYEK(1)GLVYK	1	0.00226316	72.607	1	0.00226316	72.607	1	0.00245935	71.614	3
	KFZ67_03450	12	K	Lipoyl synthase OS=Photobacterium damselae subsp. damselae OX=85581 GN=lipA PE=3 SV=1	lipA	2	1.2057	2	IEQGVK(1)YR	1	0.0247989	53.968	1	0.038971	53.968	1	0.0247989	51.276	3
	KFZ67_02530	432	K	CTP synthase OS=Photobacterium damselae OX=38293 GN=pyrG PE=3 SV=1	pyrG	2	-3.2391	3	SEK(1)SDLGGTMR	1	0.00179928	57.175	1	0.011105	40.475	1	0.00179928	57.175	3
	KFZ67_02530	326	K	CTP synthase OS=Photobacterium damselae OX=38293 GN=pyrG PE=3 SV=1	pyrG	2	0.4867	6	IK(1)YIDSQDVESK	1	3.40275e-07	104.24	1	3.64667e-05	84.365	1	3.40275e-07	104.24	3
	KFZ67_02530	366	K	CTP synthase OS=Photobacterium damselae OX=38293 GN=pyrG PE=3 SV=1	pyrG	2	-0.10302	2	ILTAK(1)YAR	1	1.93025e-08	122.13	1	0.000132509	98.523	1	1.93025e-08	122.13	3
	KFZ67_02335	20	K	Fructose-bisphosphate aldolase OS=Photobacterium damselae OX=38293 GN=fbaA PE=3 SV=1	fbaA	3	0.52701	5	IFDFVKPGVISGDDVQK(1)VFEVAK	1	4.81435e-22	107.21	0.999677	5.6263e-07	64.749	1	4.81435e-22	107.21	3
	KFZ67_02530	361	K	CTP synthase OS=Photobacterium damselae OX=38293 GN=pyrG PE=3 SV=1	pyrG	2	0.16661	3	GVEGK(1)ILTAK	1	0.00192839	63.624	1	0.00206207	62.466	1	0.00192839	63.624	3
	KFZ67_02500	174	K	Pyridoxine 5'-phosphate synthase OS=Photobacterium damselae OX=38293 GN=pdxJ PE=3 SV=1	pdxJ	2	-1.128	3	K(1)IAAAASYAADLGIK	1	2.76623e-05	63.682	1	3.33052e-05	61.265	1	2.76623e-05	63.682	3
	KFZ67_02395	9	K	Glycine cleavage system H protein OS=Photobacterium damselae OX=38293 GN=gcvH PE=3 SV=1	gcvH	4	-0.53551	3	SYVPSDLK(1)FTHSHEWVR	1	1.30603e-12	99.747	1	1.30603e-12	99.747	1	3.53027e-10	97.235	3
	KFZ67_02360	8	K	Ribose-5-phosphate isomerase A OS=Photobacterium damselae OX=38293 GN=rpiA PE=3 SV=1	rpiA	2	0.91171	3	K(1)AAGWAALEYVK	1	0.00172073	56.569	1	0.00289524	49.269	1	0.00172073	56.569	3
	KFZ67_10775	149	K	Glutamate--tRNA ligase OS=Photobacterium damselae OX=38293 GN=gltX PE=3 SV=1	gltX	2	1.6583	3	NPK(1)EGTVVFDDK	1	1.23286e-06	87.831	1	1.23286e-06	87.831	1	0.000137476	79.744	3
	KFZ67_10990	53	K	Na(+)-translocating NADH-quinone reductase subunit A OS=Photobacterium damselae OX=38293 GN=nqrA PE=3 SV=1	nqrA	2	1.9172	2	K(1)GQVLFEDK	1	7.86927e-05	98.048	1	7.86927e-05	98.048	1	0.00184034	73.885	3
	KFZ67_10990	75	K	Na(+)-translocating NADH-quinone reductase subunit A OS=Photobacterium damselae OX=38293 GN=nqrA PE=3 SV=1	nqrA	2	-1.6399	2	FTAPAAGK(1)VAEINR	1	2.20557e-05	82.651	1	0.00171697	46.89	1	2.20557e-05	82.651	3
	KFZ67_10810	24	K	HPr family phosphocarrier protein OS=Photobacterium damselae OX=38293 GN=ptsH PE=4 SV=1	ptsH	2	-0.25589	4	PAAQFVK(1)DAK	1	1.17128e-12	133.89	1	3.76398e-08	120.06	1	1.17128e-12	133.89	3
	KFZ67_10810	4	K	HPr family phosphocarrier protein OS=Photobacterium damselae OX=38293 GN=ptsH PE=4 SV=1	ptsH	3	-0.43847	11	MYQK(1)QVEITAPNGLHTR	1	1.59859e-23	132.4	1	1.59859e-23	132.4	1	1.59859e-23	132.4	3
	KFZ67_10810	27	K	HPr family phosphocarrier protein OS=Photobacterium damselae OX=38293 GN=ptsH PE=4 SV=1	ptsH	2	-1.5162	4	DAK(1)AFDADITVTSNGK	1	3.04738e-09	96.773	1	3.04738e-09	96.773	1	2.21232e-07	84.859	3
	KFZ67_13250	93	K	30S ribosomal protein S6 OS=Photobacterium damselae OX=38293 GN=rpsF PE=3 SV=1	rpsF	2	-0.63834	4	TK(1)GAITEPSPMMK	1	1.7671e-09	100.11	1	3.13705e-05	83.692	1	1.7671e-09	100.11	3
	KFZ67_13250	53	K	30S ribosomal protein S6 OS=Photobacterium damselae OX=38293 GN=rpsF PE=3 SV=1	rpsF	3	-0.22574	6	QMAYPINK(1)LHK	1	2.10272e-05	79.492	1	0.000596433	63.662	1	2.10272e-05	79.492	3
	KFZ67_13250	56	K	30S ribosomal protein S6 OS=Photobacterium damselae OX=38293 GN=rpsF PE=3 SV=1	rpsF	4	-2.2386	5	LHK(1)AHYVLMNVEAEQAVIDELESNFR	1	1.11144e-63	154.69	1	1.11144e-63	154.69	1	4.29698e-45	134.68	3
	KFZ67_13670	3	K	DNA-binding protein OS=Photobacterium damselae OX=38293 GN=hupA PE=3 SV=1	hupA	3	-0.05776	6	MNK(1)TQLIDLIAEK	1	1.71299e-10	108.66	1	0.000245567	68.972	1	1.71299e-10	108.66	3
	KFZ67_02530	239	K	CTP synthase OS=Photobacterium damselae OX=38293 GN=pyrG PE=3 SV=1	pyrG	2	0.93002	3	AVISMK(1)DVDSIYK	1	0.000326424	54.09	1	0.000326424	50.641	1	0.000847781	54.09	3
	KFZ67_02330	193	K	Phosphoglycerate kinase OS=Photobacterium damsela subsp. piscicida OX=38294 GN=pgk PE=3 SV=1	pgk	2	4.0599	5	PMVAIVGGSK(1)VSTK	1	2.20557e-05	82.651	1	2.20557e-05	82.651	1	8.49995e-05	73.834	3
	KFZ67_02335	26	K	Fructose-bisphosphate aldolase OS=Photobacterium damselae OX=38293 GN=fbaA PE=3 SV=1	fbaA	2	1.0733	6	VFEVAK(1)ENK	1	1.00106e-07	119.75	1	1.00106e-07	119.75	1	3.84516e-05	104.89	3
	KFZ67_02335	113	K	Fructose-bisphosphate aldolase OS=Photobacterium damselae OX=38293 GN=fbaA PE=3 SV=1	fbaA	5	-0.76607	13	YVHAIAETYGVPVILHTDHAAK(1)K	1	1.63571e-44	136.49	1	3.60001e-35	122.94	1	1.63571e-44	136.49	3
	KFZ67_02330	374	K	Phosphoglycerate kinase OS=Photobacterium damsela subsp. piscicida OX=38294 GN=pgk PE=3 SV=1	pgk	2	-0.1494	6	K(1)LPAVEMLETR	1	9.57148e-06	92.247	1	9.57148e-06	92.247	1	1.83278e-05	86.114	3
	KFZ67_02330	53	K	Phosphoglycerate kinase OS=Photobacterium damsela subsp. piscicida OX=38294 GN=pgk PE=3 SV=1	pgk	3	-0.76268	3	HCLEAGAK(1)VMVTSHLGR	1	8.61424e-13	103.13	1	3.76371e-06	65.105	1	8.61424e-13	103.13	3
	KFZ67_02330	27	K	Phosphoglycerate kinase OS=Photobacterium damsela subsp. piscicida OX=38294 GN=pgk PE=3 SV=1	pgk	2	-0.89737	7	ADLNVPVK(1)DGK	1	0.000824172	68.676	1	0.00127952	64.121	1	0.000824172	68.676	3
	KFZ67_03895	292	K	Acetate kinase OS=Photobacterium damselae OX=38293 GN=ackA_1 PE=3 SV=1	ackA_1	2	-1.0422	6	FVEDNYGDK(1)EEATR	1	1.45219e-23	139.86	1	0.000558701	57.288	1	1.45219e-23	139.86	3
	KFZ67_04360	87	K	ATP-dependent Clp protease ATP-binding subunit ClpX OS=Photobacterium damselae OX=38293 GN=clpX PE=3 SV=1	clpX	3	0.36269	3	K(1)VLAVAVYNHYK	1	0.000175708	75.819	1	0.000269952	72.34	1	0.000175708	75.819	3
	KFZ67_04350	414	K	Trigger factor OS=Photobacterium damselae OX=38293 GN=tig PE=3 SV=1	tig	3	0.4563	3	NIALEEQAIDAIVAK(1)AQVSDK	1	3.73436e-27	115.54	1	1.29424e-21	107.25	1	3.73436e-27	115.54	3
	KFZ67_04350	206	K	Trigger factor OS=Photobacterium damselae OX=38293 GN=tig PE=3 SV=1	tig	3	-1.4526	3	K(1)AGEEFNIEVTFPEEYHAENLK	1	5.42406e-16	91.531	1	5.42406e-16	91.531	1	6.89952e-16	89.816	3
	KFZ67_04350	287	K	Trigger factor OS=Photobacterium damselae OX=38293 GN=tig PE=3 SV=1	tig	4	0.8193	2	IK(1)EQAINGLIEQNDIAVPAALIDQEINVLR	1	4.02269e-05	42.709	1	5.71086e-05	42.709	1	4.02269e-05	40.952	3
	KFZ67_04350	48	K	Trigger factor OS=Photobacterium damselae OX=38293 GN=tig PE=3 SV=1	tig	2	1.473	4	FDGFRPGK(1)APLK	1	2.17096e-06	106.26	1	0.000944276	81.565	1	2.17096e-06	106.26	3
	KFZ67_04350	236	K	Trigger factor OS=Photobacterium damselae OX=38293 GN=tig PE=3 SV=1	tig	2	-1.6315	3	AAVFAIK(1)LSK	1	0.00603875	53.237	1	0.00603875	53.237	1	0.00603875	53.237	3
	KFZ67_04335	7	K	UTP--glucose-1-phosphate uridylyltransferase OS=Photobacterium damselae OX=38293 GN=galU PE=3 SV=1	galU	2	0.44021	3	K(1)AVIPVAGLGTR	1	2.87812e-07	97.463	1	0.00135418	70.089	1	2.87812e-07	97.463	3
	KFZ67_10805	105	K	Cysteine synthase OS=Photobacterium damselae OX=38293 GN=cysK PE=3 SV=1	cysK	2	1.8253	3	LLK(1)ALGANLELTEAAK	1	2.70028e-08	88.385	1	5.82873e-06	70.197	1	2.70028e-08	88.385	3
	KFZ67_10805	137	K	Cysteine synthase OS=Photobacterium damselae OX=38293 GN=cysK PE=3 SV=1	cysK	4	0.37114	3	AEEIVASNPSK(1)YLLLQQFNNPANPEIHEK	1	3.10417e-19	94.275	1	3.10417e-19	94.275	1	6.96964e-14	83.879	3
	KFZ67_02335	301	K	Fructose-bisphosphate aldolase OS=Photobacterium damselae OX=38293 GN=fbaA PE=3 SV=1	fbaA	3	0.21001	8	K(1)FEAENHDYLQGQIGNPTGPDAPNK	1	2.10236e-16	86.18	1	1.18301e-07	69.284	1	2.10236e-16	86.18	3
	KFZ67_04275	10	K	Acetyl-coenzyme A carboxylase carboxyl transferase subunit beta OS=Photobacterium damselae subsp. damselae OX=85581 GN=accD PE=3 SV=1	accD	2	0.1021	3	ILTK(1)SNIVTSR	1	1.12446e-09	119.74	1	9.70305e-07	103.43	1	1.12446e-09	119.74	3
	KFZ67_04075	114	K	Chorismate synthase OS=Photobacterium damselae OX=38293 GN=aroC PE=3 SV=1	aroC	4	-0.50724	2	PGHADYTYHQK(1)YGIR	1	3.24101e-12	106.11	1	9.08232e-06	70.829	1	3.24101e-12	106.11	3
	KFZ67_03980	60	K	Exodeoxyribonuclease III OS=Photobacterium damselae OX=38293 GN=BST98_03965 PE=4 SV=1	BST98_03965	4	0.89593	3	VYHHGQK(1)AHYGVALLCK	1	1.35618e-06	71.531	1	5.01889e-06	62.077	1	1.35618e-06	71.531	3
	KFZ67_03980	24	K	Exodeoxyribonuclease III OS=Photobacterium damselae OX=38293 GN=BST98_03965 PE=4 SV=1	BST98_03965	3	-0.57771	2	LHQLQALIEK(1)HQPDVIGLQEIK	1	4.54589e-05	54.047	1	7.02822e-05	50.202	1	4.54589e-05	54.047	3
	KFZ67_03960	121	K	Formate C-acetyltransferase OS=Photobacterium damselae OX=38293 GN=pflB PE=4 SV=1	pflB	2	0.60346	5	MIEGSCK(1)VYGR	1	1.35601e-11	120.06	1	1.35601e-11	110.39	1	6.50711e-10	120.06	3
	KFZ67_03960	159	K	Formate C-acetyltransferase OS=Photobacterium damselae OX=38293 GN=pflB PE=4 SV=1	pflB	2	0.14041	13	K(1)SGVLTGLPDAYGR	1	3.29549e-80	206.49	1	3.29549e-80	206.49	1	9.0792e-42	169.4	3
	KFZ67_03960	722	K	Formate C-acetyltransferase OS=Photobacterium damselae OX=38293 GN=pflB PE=4 SV=1	pflB	2	-0.44313	5	HPEK(1)YPQLTIR	1	7.84229e-10	120.55	1	7.39802e-07	105.03	1	7.84229e-10	120.55	3
	KFZ67_03960	718	K	Formate C-acetyltransferase OS=Photobacterium damselae OX=38293 GN=pflB PE=4 SV=1	pflB	2	0.10825	3	ETLEDAVK(1)HPEK	1	0.000241457	74.987	1	0.00105583	62.088	1	0.000241457	74.987	3
	KFZ67_03960	640	K	Formate C-acetyltransferase OS=Photobacterium damselae OX=38293 GN=pflB PE=4 SV=1	pflB	2	2.0227	11	DEK(1)GAVASLTSVGK	1	5.80887e-13	115.68	1	1.27677e-06	86.497	1	5.80887e-13	115.68	3
	KFZ67_03960	612	K	Formate C-acetyltransferase OS=Photobacterium damselae OX=38293 GN=pflB PE=4 SV=1	pflB	3	0.038674	3	DAIPTQSILTITSNVVYGK(1)K	1	1.02046e-07	72.21	1	7.97813e-07	65.022	1	1.02046e-07	72.21	3
	KFZ67_03960	232	K	Formate C-acetyltransferase OS=Photobacterium damselae OX=38293 GN=pflB PE=4 SV=1	pflB	2	-0.84425	3	ALGQIK(1)AMAAK	1	9.4841e-06	89.913	1	9.80932e-05	80.986	1	9.4841e-06	89.913	3
	KFZ67_03890	33	K	Phosphate acetyltransferase OS=Photobacterium damselae OX=38293 GN=pta PE=3 SV=1	pta	2	-1.5228	2	VSFFK(1)PIAQPR	1	0.000240294	77.744	1	0.00355096	54.486	1	0.000240294	77.744	3
	KFZ67_03890	413	K	Phosphate acetyltransferase OS=Photobacterium damselae OX=38293 GN=pta PE=3 SV=1	pta	2	-0.46396	3	TVK(1)AAAICAER	1	0.000208333	78.884	1	0.000564993	71.268	1	0.000208333	78.884	3
	KFZ67_03890	473	K	Phosphate acetyltransferase OS=Photobacterium damselae OX=38293 GN=pta PE=3 SV=1	pta	2	-1.4276	2	GAK(1)GMTEVVAR	1	0.000200726	75.416	1	0.000200726	75.416	1	0.00315164	50.354	3
	KFZ67_04260	166	K	Aspartate-semialdehyde dehydrogenase OS=Photobacterium damsela subsp. piscicida OX=38294 GN=asd PE=3 SV=1	asd	2	-0.3557	3	INVATYQSVSGSGK(1)K	1	5.27389e-09	96.673	1	5.12514e-08	86.497	1	5.27389e-09	96.673	3
	KFZ67_13575	348	K	Acetyl-coenzyme A synthetase OS=Photobacterium damselae OX=38293 GN=acs PE=3 SV=1	acs	3	1.4901	3	MSQVVDK(1)HQVNILYTAPTAIR	1	2.27558e-10	74.364	1	8.5193e-08	72.167	1	2.27558e-10	74.364	3
	KFZ67_02005	387	K	Aconitate hydratase B OS=Photobacterium damselae subsp. damselae OX=85581 GN=acnB PE=3 SV=1	acnB	2	2.1684	6	GYTLAQK(1)MVGK	1	0.000309863	72.2	1	0.000309863	72.2	1	0.000468429	69.786	3
	KFZ67_04365	562	K	Lon protease OS=Photobacterium damselae OX=38293 GN=lon PE=2 SV=1	lon	2	0.96705	2	EILLNK(1)DVK	1	0.0131687	50.353	1	0.0183472	47.302	1	0.0131687	50.353	3
	KFZ67_04950	57	K	Cold shock domain protein CspD OS=Photobacterium damsela subsp. piscicida OX=38294 GN=cspD PE=4 SV=1	cspD	3	-0.52911	5	AGQQVNYEVQTGPK(1)GFHAR	1	1.11596e-28	124.62	1	7.21131e-12	87.088	1	1.11596e-28	124.62	3
	KFZ67_04945	351	K	Isocitrate dehydrogenase [NADP] OS=Photobacterium damselae OX=38293 GN=icd PE=4 SV=1	icd	3	0.2696	3	YAGQDK(1)VNPGSLILSAEMMLR	1	9.1815e-28	120.73	1	9.1815e-28	120.73	1	1.16609e-17	97.733	3
	KFZ67_04945	56	K	Isocitrate dehydrogenase [NADP] OS=Photobacterium damselae OX=38293 GN=icd PE=4 SV=1	icd	2	0.5647	13	VVDAAVQK(1)AYGGDR	1	2.15272e-17	128.22	1	1.91715e-10	107.74	1	2.15272e-17	128.22	3
	KFZ67_04945	274	K	Isocitrate dehydrogenase [NADP] OS=Photobacterium damselae OX=38293 GN=icd PE=4 SV=1	icd	2	0.61097	3	NPNTGK(1)EIVVK	1	5.63111e-07	106.26	1	5.63111e-07	106.26	1	3.40291e-06	96.82	3
	KFZ67_04945	4	K	Isocitrate dehydrogenase [NADP] OS=Photobacterium damselae OX=38293 GN=icd PE=4 SV=1	icd	2	-1.5528	15	MDSK(1)VVVPVDGQK	1	5.06566e-07	94.688	1	2.3644e-06	88.163	1	5.06566e-07	94.688	3
	KFZ67_04945	236	K	Isocitrate dehydrogenase [NADP] OS=Photobacterium damselae OX=38293 GN=icd PE=4 SV=1	icd	2	-0.79941	7	GNIMK(1)FTEGAFK	1	7.7128e-05	82.505	1	0.000119746	80.555	1	7.7128e-05	82.505	3
	KFZ67_06640	269	K	Bifunctional PTS fructose transporter subunit IIA/HPr protein OS=Photobacterium damselae OX=38293 GN=BST98_06695 PE=4 SV=1	BST98_06695	2	-0.87551	3	IAELLASSEDK(1)VR	1	0.000541684	65.043	1	0.000541684	65.043	1	0.000541684	65.043	3
	KFZ67_04810	469	K	Luminescence regulatory protein luxO OS=Photobacterium damselae OX=38293 GN=luxO PE=4 SV=1	luxO	2	3.0704	6	K(1)LQAWQDAASK	1	1.37607e-06	90.697	1	1.37607e-06	90.697	1	0.000144277	80.555	3
	KFZ67_04810	195	K	Luminescence regulatory protein luxO OS=Photobacterium damselae OX=38293 GN=luxO PE=4 SV=1	luxO	3	-0.4599	2	HDK(1)PFVALNCAAIPK	1	2.39435e-05	62.861	1	0.0001213	56.872	1	2.39435e-05	62.861	3
	KFZ67_04810	268	K	Luminescence regulatory protein luxO OS=Photobacterium damselae OX=38293 GN=luxO PE=4 SV=1	luxO	2	2.1302	3	FIQSGTYQK(1)VGSSK	1	6.0849e-10	102.5	1	6.0849e-10	102.5	1	0.000234098	66.246	3
	KFZ67_04795	113	K	Dipeptidase E OS=Photobacterium damselae OX=38293 GN=pepE PE=3 SV=1	pepE	3	0.86442	3	K(0.997)AVLLDGK(0.003)PYIGWSAGTNICCPTIR	0.99726	6.8228e-11	74.876	0.993071	2.91151e-07	65.197	0.99726	6.8228e-11	74.876	3
	KFZ67_04735	167	K	Peroxidase OS=Photobacterium damselae OX=38293 GN=tsaA_2 PE=4 SV=1	tsaA_2	3	0.9332	7	MVDALQFHEK(1)HGEVCPAQWEK	1	1.89318e-10	75.215	1	4.71423e-07	67.214	1	1.89318e-10	75.215	3
	KFZ67_04735	134	K	Peroxidase OS=Photobacterium damselae OX=38293 GN=tsaA_2 PE=4 SV=1	tsaA_2	2	0.36321	3	GSFLIDK(1)EGVVR	1	6.21562e-17	117.86	1	6.21562e-17	117.86	1	6.28107e-17	117.79	3
	KFZ67_04950	7	K	Cold shock domain protein CspD OS=Photobacterium damsela subsp. piscicida OX=38294 GN=cspD PE=4 SV=1	cspD	2	0.53534	2	AIGTVK(1)WFNNAK	1	0.00279724	51.727	1	0.00279724	51.727	1	0.00456026	47.361	3
	KFZ67_04735	180	K	Peroxidase OS=Photobacterium damselae OX=38293 GN=tsaA_2 PE=4 SV=1	tsaA_2	2	-1.7679	7	GK(1)EGMNASPEGVAK	1	4.22576e-07	94.09	1	4.67791e-05	78.69	1	4.22576e-07	94.09	3
	KFZ67_04535	192	K	Glyceraldehyde-3-phosphate dehydrogenase OS=Photobacterium damselae OX=38293 GN=BST98_04565 PE=3 SV=1	BST98_04565	2	-0.48363	5	TVDGPSAK(1)DWR	1	1.02847e-60	189.58	1	1.02847e-60	189.58	1	6.9966e-48	178.46	3
	KFZ67_04535	4	K	Glyceraldehyde-3-phosphate dehydrogenase OS=Photobacterium damselae OX=38293 GN=BST98_04565 PE=3 SV=1	BST98_04565	2	1.2903	3	TIK(1)VGINGFGR	1	2.28342e-05	97.472	1	9.04359e-05	93.096	1	2.28342e-05	97.472	3
	KFZ67_04535	258	K	Glyceraldehyde-3-phosphate dehydrogenase OS=Photobacterium damselae OX=38293 GN=BST98_04565 PE=3 SV=1	BST98_04565	2	-0.93259	7	NGASYETICK(1)AMK	1	2.37952e-06	88.101	1	0.000101745	79.089	1	2.37952e-06	88.101	3
	KFZ67_04535	70	K	Glyceraldehyde-3-phosphate dehydrogenase OS=Photobacterium damselae OX=38293 GN=BST98_04565 PE=3 SV=1	BST98_04565	3	1.451	5	FNGTVEVEGGNLIVNGK(1)TVR	1	6.36502e-22	110.33	1	6.36502e-22	110.33	1	1.6887e-12	87.963	3
	KFZ67_04535	225	K	Glyceraldehyde-3-phosphate dehydrogenase OS=Photobacterium damselae OX=38293 GN=BST98_04565 PE=3 SV=1	BST98_04565	3	-1.2794	3	AVGVVLPEVNGK(1)LTGMAFR	1	4.58562e-52	144.15	1	1.80574e-36	144.15	1	4.58562e-52	135.23	3
	KFZ67_04535	269	K	Glyceraldehyde-3-phosphate dehydrogenase OS=Photobacterium damselae OX=38293 GN=BST98_04565 PE=3 SV=1	BST98_04565	3	-1.3297	6	DASEGSLK(1)GILGYTEDAVVSTDFNGDTR	1	3.40921e-46	123.19	1	3.40921e-46	123.19	1	1.64781e-19	96.351	3
	KFZ67_04535	261	K	Glyceraldehyde-3-phosphate dehydrogenase OS=Photobacterium damselae OX=38293 GN=BST98_04565 PE=3 SV=1	BST98_04565	2	0.63932	5	AMK(1)DASEGSLK	1	8.3041e-07	101.39	1	8.3041e-07	101.39	1	1.17696e-06	94.767	3
	KFZ67_06620	126	K	UPF0234 protein CAY62_07515 OS=Photobacterium damselae subsp. damselae OX=85581 GN=CAY62_07515 PE=3 SV=1	CAY62_07515	2	0.21691	5	VQVSIQGDK(1)LR	1	2.72771e-13	124.42	1	1.26431e-06	101.39	1	2.72771e-13	124.42	3
	KFZ67_06620	43	K	UPF0234 protein CAY62_07515 OS=Photobacterium damselae subsp. damselae OX=85581 GN=CAY62_07515 PE=3 SV=1	CAY62_07515	2	1.053	3	GVESSIELNK(1)ETVK	1	4.22576e-07	94.09	1	5.16515e-05	78.505	1	4.22576e-07	94.09	3
	KFZ67_08725	351	K	Asparagine--tRNA ligase OS=Photobacterium damselae OX=38293 GN=asnS PE=3 SV=1	asnS	3	1.4427	3	FLAEEHFK(1)APVIVK	1	0.000183577	65.295	1	0.000183577	65.295	1	0.000183577	65.295	3
	KFZ67_08725	357	K	Asparagine--tRNA ligase OS=Photobacterium damselae OX=38293 GN=asnS PE=3 SV=1	asnS	2	0.64021	3	APVIVK(1)NYPK	1	2.21008e-05	103.55	1	2.21008e-05	103.55	1	2.70237e-05	102.07	3
	KFZ67_06725	23	K	2-amino-3-ketobutyrate coenzyme A ligase OS=Photobacterium damselae OX=38293 GN=kbl PE=3 SV=1	kbl	2	2.373	2	TEGLYK(1)SER	1	0.00362928	50.353	1	0.00362928	50.194	1	0.0131687	50.353	3
	KFZ67_09950	79	K	Succinate--CoA ligase [ADP-forming] subunit beta OS=Photobacterium damselae OX=38293 GN=sucC PE=3 SV=1	sucC	3	-0.12504	5	TFSQQWLGK(1)HLVTYQTDANGQPVSK	1	1.0675e-23	98.918	1	1.0675e-23	98.918	1	3.55625e-11	78.206	3
	KFZ67_04535	184	K	Glyceraldehyde-3-phosphate dehydrogenase OS=Photobacterium damselae OX=38293 GN=BST98_04565 PE=3 SV=1	BST98_04565	3	-0.80049	11	VLNDNFGIESGLMTTVHATTATQK(1)TVDGPSAK	1	3.62959e-14	79.917	1	3.71691e-14	79.782	1	3.62959e-14	79.917	3
	KFZ67_09950	380	K	Succinate--CoA ligase [ADP-forming] subunit beta OS=Photobacterium damselae OX=38293 GN=sucC PE=3 SV=1	sucC	3	-1.4071	3	LAESGLNIIAATSLTEAAEK(1)VVQAAEGK	1	3.00553e-35	111.4	1	3.00553e-35	111.4	1	2.43255e-26	104.14	3
	KFZ67_05015	330	K	Serine--tRNA ligase OS=Photobacterium damselae OX=38293 GN=serS PE=3 SV=1	serS	2	-0.60122	3	K(1)VVLCTGDMGFGSCK	1	6.90424e-05	59.728	1	0.00175625	41.695	1	6.90424e-05	59.728	3
	KFZ67_05150	10	K	Acyl carrier protein OS=Photobacterium damsela subsp. piscicida OX=38294 GN=acpP PE=3 SV=1	acpP	3	1.0574	3	K(1)IIVEQLGVDESEVK	1	3.15493e-08	89.911	1	2.77047e-05	62.055	1	3.15493e-08	89.911	3
	KFZ67_05230	9	K	D-lactate dehydrogenase OS=Photobacterium damselae subsp. damselae OX=85581 GN=ldhA PE=3 SV=1	ldhA	2	0.54705	6	VAVFSTK(1)NYDQK	1	7.59699e-06	89.301	1	0.000184412	77.597	1	7.59699e-06	89.301	3
	KFZ67_06390	4	K	NrdJb OS=Photobacterium damsela subsp. piscicida OX=38294 GN=E4T26_03540 PE=4 SV=1	E4T26_03540	2	-2.2905	3	K(1)IEQNIVGFK	1	0.000524717	78.342	1	0.000524717	78.342	1	0.000605722	76.332	3
	KFZ67_06355	66	K	Integration host factor subunit alpha OS=Photobacterium damselae OX=38293 GN=ihfA PE=3 SV=1	ihfA	2	1.6501	3	NPK(1)TGEDIPITAR	1	0.000721668	60.901	1	0.00113693	56.286	1	0.000721668	60.901	3
	KFZ67_06140	165	K	UPF0227 protein CAY62_07935 OS=Photobacterium damselae subsp. damselae OX=85581 GN=CAY62_07935 PE=3 SV=1	CAY62_07935	2	1.5821	3	K(1)ISQHLQTIK	1	9.57481e-25	147.58	1	5.21162e-08	118.77	1	9.57481e-25	147.58	3
	KFZ67_06140	114	K	UPF0227 protein CAY62_07935 OS=Photobacterium damselae subsp. damselae OX=85581 GN=CAY62_07935 PE=3 SV=1	CAY62_07935	3	0.80444	3	IDRPEEYADIATK(1)CVTDFR	1	1.0967e-09	79.467	1	8.2861e-07	66.536	1	1.0967e-09	79.467	3
	KFZ67_06110	98	K	Dihydroorotase OS=Photobacterium damselae OX=38293 GN=pyrC PE=3 SV=1	pyrC	3	-1.642	5	ESGHIYAAK(1)LYPAGATTNSDSGVTSIDK	1	8.10149e-36	119.45	1	1.64781e-19	96.351	1	8.10149e-36	119.45	3
	KFZ67_06020	118	K	Enoyl-[acyl-carrier-protein] reductase [NADH] OS=Photobacterium damselae OX=38293 GN=fabV PE=3 SV=1	fabV	2	-1.2581	5	SLNGDAFSNEAK(1)QK	1	0.000367668	60.55	1	0.000367668	60.55	1	0.000650333	55.724	3
	KFZ67_06020	42	K	Enoyl-[acyl-carrier-protein] reductase [NADH] OS=Photobacterium damselae OX=38293 GN=fabV PE=3 SV=1	fabV	2	-1.0306	3	AQGPIANAPK(1)R	1	1.23408e-06	100.58	1	1.55546e-05	88.056	1	1.23408e-06	100.58	3
	KFZ67_05990	219	K	Pyruvate kinase OS=Photobacterium damselae OX=38293 GN=BST98_06040 PE=3 SV=1	BST98_06040	2	0.4741	3	LAEEAGLQAK(1)LVAK	1	0.0002391	66.004	1	0.00111565	48.532	1	0.0002391	66.004	3
	KFZ67_05880	84	K	Integration host factor subunit beta OS=Photobacterium damselae OX=38293 GN=ihfB PE=3 SV=1	ihfB	4	1.0993	3	YVPHFK(0.001)PGK(0.999)ELR	0.999309	0.000403205	73.082	0.994999	0.00256773	56.956	0.999309	0.000403205	73.082	3
	KFZ67_05875	279	K	30S ribosomal protein S1 OS=Photobacterium damselae OX=38293 GN=rpsA PE=3 SV=1	rpsA	2	-0.27381	3	YPEGTK(1)LTGR	1	0.0012303	69.672	1	0.0012303	69.672	1	0.00219163	61.344	3
	KFZ67_05875	272	K	30S ribosomal protein S1 OS=Photobacterium damselae OX=38293 GN=rpsA PE=3 SV=1	rpsA	2	1.9725	4	QLGEDPWVAIAK(1)R	1	0.000129846	76.24	1	0.000145591	75.088	1	0.000129846	76.24	3
	KFZ67_05875	449	K	30S ribosomal protein S1 OS=Photobacterium damselae OX=38293 GN=rpsA PE=3 SV=1	rpsA	3	-0.069626	3	QIEEDPFNGFVAATK(1)K	1	3.75217e-12	102.39	1	3.75217e-12	102.39	1	6.21855e-09	95.073	3
	KFZ67_05140	286	K	Malonyl CoA-acyl carrier protein transacylase OS=Photobacterium damselae OX=38293 GN=BST98_05170 PE=3 SV=1	BST98_05170	2	0.57701	3	VLTGLTK(1)R	1	0.0295218	56.434	1	0.0338837	51.113	1	0.0295218	56.434	3
	KFZ67_05875	450	K	30S ribosomal protein S1 OS=Photobacterium damselae OX=38293 GN=rpsA PE=3 SV=1	rpsA	2	-0.80485	13	K(1)GALVNGTVTAVDAK	1	1.83039e-17	119.45	1	8.48747e-12	101.42	1	1.83039e-17	119.45	3
	KFZ67_05875	244	K	30S ribosomal protein S1 OS=Photobacterium damselae OX=38293 GN=rpsA PE=3 SV=1	rpsA	3	1.9468	4	HPSEIVNVGDEINVK(1)VLK	1	1.92645e-21	117.2	1	1.8956e-15	98.227	1	1.92645e-21	117.2	3
	KFZ67_05875	117	K	30S ribosomal protein S1 OS=Photobacterium damselae OX=38293 GN=rpsA PE=3 SV=1	rpsA	2	2.9095	2	VK(1)GGFTVELNGIR	1	1.54368e-09	101.38	1	1.54368e-09	101.38	1	2.10365e-06	89.231	3
	KFZ67_05875	115	K	30S ribosomal protein S1 OS=Photobacterium damselae OX=38293 GN=rpsA PE=3 SV=1	rpsA	3	-1.934	6	AYEDAETVVGIINGK(1)VK	1	1.49836e-06	71.08	1	4.1261e-05	63.062	1	1.49836e-06	71.08	3
	KFZ67_05355	94	K	Elongation factor G OS=Photobacterium damselae OX=38293 GN=fusA PE=3 SV=1	fusA	3	-0.1967	3	SLK(1)VLDGGIGVFCGSGGVEPQSETNWR	1	2.75773e-24	100.23	1	2.75773e-24	100.23	1	1.15807e-11	77.51	3
	KFZ67_05355	506	K	Elongation factor G OS=Photobacterium damselae OX=38293 GN=fusA PE=3 SV=1	fusA	2	-0.7137	7	QSGGSGQFGK(1)IDYR	1	1.77328e-31	151.22	1	1.77328e-31	151.22	1	2.26597e-23	135.86	3
	KFZ67_05355	6	K	Elongation factor G OS=Photobacterium damselae OX=38293 GN=fusA PE=3 SV=1	fusA	2	0.37077	9	TDLSK(1)YR	1	4.47283e-69	198.07	1	4.47283e-69	198.07	1	5.53874e-44	182.39	3
	KFZ67_05355	133	K	Elongation factor G OS=Photobacterium damselae OX=38293 GN=fusA PE=3 SV=1	fusA	2	1.5052	3	LIFVNK(1)LDR	1	6.53677e-06	109.29	1	7.52445e-05	99.815	1	6.53677e-06	109.29	3
	KFZ67_05355	335	K	Elongation factor G OS=Photobacterium damselae OX=38293 GN=fusA PE=3 SV=1	fusA	2	1.5248	12	LNK(1)GDTILNSATGK	1	3.04854e-41	165.02	1	3.06719e-17	125.47	1	3.04854e-41	165.02	3
	KFZ67_05355	332	K	Elongation factor G OS=Photobacterium damselae OX=38293 GN=fusA PE=3 SV=1	fusA	2	0.28716	3	IYSGK(1)LNK	1	4.0904e-11	128.61	1	9.05992e-07	110.12	1	4.0904e-11	128.61	3
	KFZ67_05355	36	K	Elongation factor G OS=Photobacterium damselae OX=38293 GN=fusA PE=3 SV=1	fusA	3	-0.50844	13	IHK(1)IGDTHDGSTTTDFMEQEAER	1	2.04776e-16	93.583	1	2.04776e-16	93.583	1	2.04776e-16	93.583	3
	KFZ67_05355	495	K	Elongation factor G OS=Photobacterium damselae OX=38293 GN=fusA PE=3 SV=1	fusA	3	-0.31726	7	ETITTPIEDSYTHK(1)K	1	4.10222e-06	74.789	1	4.10222e-06	74.789	1	4.70294e-06	73.245	3
	KFZ67_05355	314	K	Elongation factor G OS=Photobacterium damselae OX=38293 GN=fusA PE=3 SV=1	fusA	2	-0.045064	3	ALAFK(1)IMDDR	1	0.000126404	93.096	1	0.000403372	82.417	1	0.000126404	93.096	3
	KFZ67_05040	362	K	Methionine--tRNA ligase OS=Photobacterium damselae OX=38293 GN=metG PE=3 SV=1	metG	2	-0.078876	3	YYYAAK(1)LNSR	1	7.10743e-05	96.171	1	0.00204283	62.633	1	7.10743e-05	96.171	3
	KFZ67_05875	347	K	30S ribosomal protein S1 OS=Photobacterium damselae OX=38293 GN=rpsA PE=3 SV=1	rpsA	2	0.61331	4	ISLGLK(1)QCK	1	5.20795e-44	177.97	1	5.20795e-44	177.97	1	4.01838e-24	149.57	3
	KFZ67_02060	2	K	Hypoxanthine phosphoribosyltransferase OS=Photobacterium damsela subsp. piscicida OX=38294 GN=hpt PE=3 SV=1	hpt	3	-2.107	3	MK(1)QHTIEVMISEQEVQER	1	3.15432e-12	95.205	1	3.15432e-12	95.205	1	3.58587e-12	94.845	3
	KFZ67_10375	232	K	Fatty acid oxidation complex subunit alpha OS=Photobacterium damselae OX=38293 GN=BST98_10320 PE=3 SV=1	BST98_10320	2	0.50631	3	SVVFDQAK(1)K	1	0.00393358	61.78	1	0.00484429	59.908	1	0.00393358	61.78	3
	KFZ67_10090	145	K	Adenylate kinase OS=Photobacterium damsela subsp. piscicida OX=38294 GN=adk PE=3 SV=1	adk	2	2.7291	3	VEGK(1)DDVTGEDLVVR	1	4.67566e-06	75.911	1	0.000134667	64.565	1	4.67566e-06	75.911	3
	KFZ67_08760	59	K	Aminotransferase OS=Photobacterium damselae OX=38293 GN=BST98_08775 PE=3 SV=1	BST98_08775	2	1.2269	2	AEAILLDK(1)ETTK	1	0.000715088	66.989	1	0.00279747	51.726	1	0.000715088	66.989	3
	KFZ67_04510	188	K	SpoVR family protein OS=Photobacterium damselae OX=38293 GN=CTN07_12290 PE=4 SV=1	CTN07_12290	2	0.37651	3	PQK(1)ISLVEETAR	1	0.00462504	69.721	1	0.00462504	69.721	1	0.0060553	67.385	3
	KFZ67_04510	263	K	SpoVR family protein OS=Photobacterium damselae OX=38293 GN=CTN07_12290 PE=4 SV=1	CTN07_12290	2	0.69203	3	K(1)VSQYFYPQK	1	0.00167394	64.103	1	0.00662179	50.452	1	0.00167394	64.103	3
	KFZ67_08360	151	K	Alanine dehydrogenase OS=Photobacterium damselae OX=38293 GN=ald PE=3 SV=1	ald	3	-0.94496	6	MSIQAGALALEK(1)SHGGK	1	8.61424e-13	103.13	1	8.61424e-13	103.13	1	1.54058e-09	94.845	3
	KFZ67_08360	7	K	Alanine dehydrogenase OS=Photobacterium damselae OX=38293 GN=ald PE=3 SV=1	ald	2	-0.65031	6	MIIGVPK(1)EIK	1	0.00126658	63.624	1	0.00363601	57.149	1	0.00126658	63.624	3
	KFZ67_08360	256	K	Alanine dehydrogenase OS=Photobacterium damselae OX=38293 GN=ald PE=3 SV=1	ald	2	0.39955	8	LVTADMIK(1)K	1	0.000754194	83.998	1	0.00202251	72.607	1	0.000754194	83.998	3
	KFZ67_08360	330	K	Alanine dehydrogenase OS=Photobacterium damselae OX=38293 GN=ald PE=3 SV=1	ald	2	0.18792	3	LANMGYK(1)K	1	0.00441826	75.213	1	0.00441826	75.213	1	0.00441826	75.213	3
	KFZ67_08140	138	K	Heme utilization protein HutZ OS=Photobacterium damselae subsp. damselae OX=85581 GN=CAY62_05895 PE=4 SV=1	CAY62_05895	3	0.25897	2	LK(1)PTHGLFVK	1	0.00192442	60.102	1	0.011356	45.158	1	0.00192442	60.102	3
	KFZ67_08140	173	K	Heme utilization protein HutZ OS=Photobacterium damselae subsp. damselae OX=85581 GN=CAY62_05895 PE=4 SV=1	CAY62_05895	2	-0.92276	2	IK(1)DGSEIQEPSEK	1	0.00137933	53.592	1	0.00137933	53.592	1	0.00169282	50.108	3
	KFZ67_07945	36	K	Uncharacterized protein	--	2	1.0316	3	IHK(1)IVWNHEGEK	1	0.000241457	74.987	1	0.00306818	50.222	1	0.000241457	74.987	3
	KFZ67_07945	85	K	Uncharacterized protein	--	3	1.4047	3	GAIK(1)FDPIHASR	1	0.000466458	67.999	1	0.00166059	58.04	1	0.000466458	67.999	3
	KFZ67_07935	90	K	50S ribosomal protein L25 OS=Photobacterium damselae OX=38293 GN=rplY PE=3 SV=1	rplY	2	-1.9498	4	VNHMDFK(1)R	1	2.18521e-11	131.06	1	0.000396933	94.114	1	2.18521e-11	131.06	3
	KFZ67_07935	83	K	50S ribosomal protein L25 OS=Photobacterium damselae OX=38293 GN=rplY PE=3 SV=1	rplY	3	-0.72294	4	PK(1)VNHMDFK	1	0.00211311	69.275	1	0.00211311	69.275	1	0.00620575	56.013	3
	KFZ67_08760	96	K	Aminotransferase OS=Photobacterium damselae OX=38293 GN=BST98_08775 PE=3 SV=1	BST98_08775	2	-1.2359	3	TK(1)TAQAPGGTGALR	1	2.19547e-17	128.09	1	2.20051e-13	119.87	1	2.19547e-17	128.09	3
	KFZ67_07935	71	K	50S ribosomal protein L25 OS=Photobacterium damselae OX=38293 GN=rplY PE=3 SV=1	rplY	2	1.3187	6	EVQVK(1)PQDIQR	1	2.04813e-37	170.52	1	2.04813e-37	170.52	1	6.49808e-37	168.22	3
	KFZ67_04520	122	K	PrkA family serine protein kinase OS=Photobacterium damselae OX=38293 GN=CTM90_13680 PE=4 SV=1	CTM90_13680	2	0.57522	6	SSLAEK(1)LK	1	0.000122085	99.442	1	0.00464723	76.064	1	0.000122085	99.442	3
	KFZ67_04520	129	K	PrkA family serine protein kinase OS=Photobacterium damselae OX=38293 GN=CTM90_13680 PE=4 SV=1	CTM90_13680	3	1.4602	2	SLMQK(1)VPIYILTANGER	1	2.32606e-09	93.768	1	3.08474e-09	92.439	1	2.32606e-09	93.768	3
	KFZ67_04520	579	K	PrkA family serine protein kinase OS=Photobacterium damselae OX=38293 GN=CTM90_13680 PE=4 SV=1	CTM90_13680	2	-1.4935	11	NPNWTSYEK(1)LR	1	1.34186e-36	164.64	1	9.78384e-28	157.38	1	1.34186e-36	164.64	3
	KFZ67_04520	315	K	PrkA family serine protein kinase OS=Photobacterium damselae OX=38293 GN=CTM90_13680 PE=4 SV=1	CTM90_13680	2	0.20156	5	NNK(1)TNEAFLDR	1	1.76084e-19	141.08	1	2.38362e-13	125.72	1	1.76084e-19	141.08	3
	KFZ67_04520	169	K	PrkA family serine protein kinase OS=Photobacterium damselae OX=38293 GN=CTM90_13680 PE=4 SV=1	CTM90_13680	2	1.452	3	NEYGIPK(1)R	1	7.10325e-07	110.41	1	7.10325e-07	110.41	1	0.000515467	93.374	3
	KFZ67_04520	384	K	PrkA family serine protein kinase OS=Photobacterium damselae OX=38293 GN=CTM90_13680 PE=4 SV=1	CTM90_13680	2	1.0783	3	LKEPENSSVYSK(1)MR	1	0.00190382	68.044	0.999988	0.00852637	51.771	1	0.00190382	68.044	3
	KFZ67_04520	374	K	PrkA family serine protein kinase OS=Photobacterium damselae OX=38293 GN=CTM90_13680 PE=4 SV=1	CTM90_13680	2	0.84112	3	LK(1)EPENSSVYSK	1	5.71445e-07	100.22	1	5.71445e-07	100.22	1	6.70011e-06	90.412	3
	KFZ67_04520	193	K	PrkA family serine protein kinase OS=Photobacterium damselae OX=38293 GN=CTM90_13680 PE=4 SV=1	CTM90_13680	2	-0.50877	4	LHEFGGDITK(1)FK	1	4.72777e-06	92.856	1	4.72777e-06	92.856	1	0.000181277	77.74	3
	KFZ67_04520	103	K	PrkA family serine protein kinase OS=Photobacterium damselae OX=38293 GN=CTM90_13680 PE=4 SV=1	CTM90_13680	2	-1.9323	2	K(1)QILYLLGPVGGGK	1	0.000998746	48.527	1	0.000998746	48.527	1	0.00156472	46.797	3
	KFZ67_04520	550	K	PrkA family serine protein kinase OS=Photobacterium damselae OX=38293 GN=CTM90_13680 PE=4 SV=1	CTM90_13680	2	1.0536	4	PAGISNPK(1)DFR	1	6.81601e-05	84.753	1	0.0134718	47.774	0.999999	6.81601e-05	84.753	3
	KFZ67_04315	54	K	D-malate degradation protein R OS=Photobacterium damselae OX=38293 GN=dmlR_7 PE=3 SV=1	dmlR_7	3	0.47826	3	K(1)LSLTEAGHK	1	0.00031745	82.417	1	0.00031745	82.417	1	0.00031745	82.417	3
	KFZ67_04370	18	K	DNA-binding protein HU OS=Photobacterium damsela subsp. piscicida OX=38294 GN=hupB PE=3 SV=1	hupB	2	-0.21782	12	IAENADISK(1)ASAGR	1	2.64807e-80	207.04	1	2.64807e-80	207.04	1	5.03621e-53	180.85	3
	KFZ67_04365	719	K	Lon protease OS=Photobacterium damselae OX=38293 GN=lon PE=2 SV=1	lon	2	0.4956	3	GEVLPIGGLK(1)EK	1	0.00309238	50.088	1	0.00855914	43.03	1	0.00309238	50.088	3
	KFZ67_04520	211	K	PrkA family serine protein kinase OS=Photobacterium damselae OX=38293 GN=CTM90_13680 PE=4 SV=1	CTM90_13680	3	0.50358	7	VRPSILDQVGVAK(1)TEPGDENNQDISSLVGK	1	1.09303e-11	72.152	1	1.09303e-11	72.152	1	1.38072e-09	68.96	3
	KFZ67_10375	366	K	Fatty acid oxidation complex subunit alpha OS=Photobacterium damselae OX=38293 GN=BST98_10320 PE=3 SV=1	BST98_10320	2	-0.46309	3	IISK(1)AQLQK	1	0.000320728	92.838	1	0.00155125	78.113	1	0.000320728	92.838	3
	KFZ67_08760	28	K	Aminotransferase OS=Photobacterium damselae OX=38293 GN=BST98_08775 PE=3 SV=1	BST98_08775	2	0.74073	3	VEK(1)INLGVGIYK	1	3.18593e-06	94.767	1	0.000249685	74.611	1	3.18593e-06	94.767	3
	KFZ67_08860	98	K	Translation initiation factor IF-3 OS=Photobacterium damselae OX=38293 GN=infC PE=3 SV=1	infC	2	1.2693	3	QIQIK(1)EVK	1	0.000107957	100.69	1	0.00075522	91.549	1	0.000107957	100.69	3
	KFZ67_10090	69	K	Adenylate kinase OS=Photobacterium damsela subsp. piscicida OX=38294 GN=adk PE=3 SV=1	adk	3	-0.69598	4	SVIDAGQLVSDDIILGLVK(1)ER	1	7.82897e-35	128.67	1	5.83813e-27	111.66	1	7.82897e-35	128.67	3
	KFZ67_10090	50	K	Adenylate kinase OS=Photobacterium damsela subsp. piscicida OX=38294 GN=adk PE=3 SV=1	adk	3	1.591	2	QAK(1)SVIDAGQLVSDDIILGLVK	1	3.67753e-27	111.66	1	3.67753e-27	111.66	1	7.75779e-22	107.39	3
	KFZ67_10090	192	K	Adenylate kinase OS=Photobacterium damsela subsp. piscicida OX=38294 GN=adk PE=3 SV=1	adk	2	-1.4596	10	EAAAGNTK(1)YLK	1	1.81736e-07	108.9	1	1.36618e-06	100.69	1	1.81736e-07	108.9	3
	KFZ67_10075	430	K	Asparagine synthase B OS=Photobacterium damselae OX=38293 GN=asnB PE=4 SV=1	asnB	2	-0.62937	3	IEK(1)HIIR	1	6.91518e-23	152.47	1	6.91518e-23	152.47	1	1.21223e-22	147.34	3
	KFZ67_10075	391	K	Asparagine synthase B OS=Photobacterium damselae OX=38293 GN=asnB PE=4 SV=1	asnB	2	-0.26724	2	ANK(1)SMAAWGIEAR	1	0.00137933	53.592	1	0.00370953	45.207	1	0.00137933	53.592	3
	KFZ67_10040	273	K	Glutamine--tRNA ligase OS=Photobacterium damselae OX=38293 GN=glnS PE=3 SV=1	glnS	2	-1.4555	2	K(1)LNQLVTDK	1	6.2257e-05	100.58	1	6.2257e-05	100.58	1	0.000210016	94.692	3
	KFZ67_10040	419	K	Glutamine--tRNA ligase OS=Photobacterium damselae OX=38293 GN=glnS PE=3 SV=1	glnS	2	0.8986	3	GAYVIK(1)AER	1	0.00124171	80.688	1	0.00542067	59.908	1	0.00124171	80.688	3
	KFZ67_10035	9	K	Ferric uptake regulation protein OS=Photobacterium damselae OX=38293 GN=fur PE=3 SV=1	fur	2	-0.57613	3	SDNNHALK(1)QAGLK	1	2.37952e-06	88.101	1	2.37952e-06	88.101	1	0.000120002	77.894	3
	KFZ67_10005	525	K	Phosphoglucomutase, alpha-D-glucose phosphate-specific OS=Photobacterium damselae OX=38293 GN=BST98_09950 PE=3 SV=1	BST98_09950	3	0.084306	3	GK(1)EHLALIEK	1	0.000584808	73.435	1	0.000764397	71.176	1	0.000584808	73.435	3
	KFZ67_10005	273	K	Phosphoglucomutase, alpha-D-glucose phosphate-specific OS=Photobacterium damselae OX=38293 GN=BST98_09950 PE=3 SV=1	BST98_09950	2	1.1601	6	FMSLDK(1)DGVIR	1	0.00024225	77.674	1	0.00597825	50.354	1	0.00024225	77.674	3
	KFZ67_09985	222	K	Citrate synthase OS=Photobacterium damselae OX=38293 GN=gltA PE=3 SV=1	gltA	3	1.6511	4	ALDK(1)IFILHADHEQNASTSTVR	1	2.35004e-29	122.35	1	2.35004e-29	122.35	1	2.28984e-22	109.32	3
	KFZ67_09985	293	K	Citrate synthase OS=Photobacterium damselae OX=38293 GN=gltA PE=3 SV=1	gltA	3	-0.63837	3	AK(1)DKDDPFR	1	5.99189e-17	139.39	0.999836	8.26491e-05	98.254	1	5.99189e-17	139.39	3
	KFZ67_09985	103	K	Citrate synthase OS=Photobacterium damselae OX=38293 GN=gltA PE=3 SV=1	gltA	2	0.047713	3	AEYEK(1)FR	1	0.000224622	107.32	1	0.000224622	107.32	1	0.000448139	104.45	3
	KFZ67_08860	127	K	Translation initiation factor IF-3 OS=Photobacterium damselae OX=38293 GN=infC PE=3 SV=1	infC	2	-0.51495	3	FLEEGNK(1)GK	1	0.00213948	73.233	1	0.00213948	73.233	1	0.00345595	66.568	3
	KFZ67_09960	923	K	2-oxoglutarate dehydrogenase E1 component OS=Photobacterium damselae OX=38293 GN=sucA PE=4 SV=1	sucA	3	-2.8372	3	PASASPAVGYMSVHLK(1)QQK	1	9.33891e-13	96.447	1	9.33891e-13	96.447	1	3.49173e-12	92.633	3
	KFZ67_09955	77	K	Dihydrolipoyllysine-residue succinyltransferase component of 2-oxoglutarate dehydrogenase complex OS=Photobacterium damselae OX=38293 GN=BST98_09900 PE=3 SV=1	BST98_09900	3	-3.0246	2	LK(1)VNAVAGEPTVDVPAGAEASPNKR	1	5.87317e-17	95.153	1	5.87317e-17	95.153	0.999997	2.21644e-05	56.131	3
	KFZ67_09955	287	K	Dihydrolipoyllysine-residue succinyltransferase component of 2-oxoglutarate dehydrogenase complex OS=Photobacterium damselae OX=38293 GN=BST98_09900 PE=3 SV=1	BST98_09900	2	-2.022	4	DCDK(1)LSLAEIEK	1	0.000551268	69.345	1	0.00118865	55.724	1	0.000551268	69.345	3
	KFZ67_09945	7	K	Succinate--CoA ligase [ADP-forming] subunit alpha OS=Photobacterium damselae subsp. damselae OX=85581 GN=sucD PE=3 SV=1	sucD	2	0.6527	3	SILINK(1)DTK	1	1.02589e-07	119.68	1	1.02589e-07	119.68	1	1.02589e-07	119.68	3
	KFZ67_09945	228	K	Succinate--CoA ligase [ADP-forming] subunit alpha OS=Photobacterium damselae subsp. damselae OX=85581 GN=sucD PE=3 SV=1	sucD	3	-0.51358	4	QHVTK(1)PVVSYIAGVTAPPGK	1	5.05431e-22	112.82	1	5.05431e-22	112.82	1	6.34281e-22	110.37	3
	KFZ67_09945	243	K	Succinate--CoA ligase [ADP-forming] subunit alpha OS=Photobacterium damselae subsp. damselae OX=85581 GN=sucD PE=3 SV=1	sucD	3	0.028747	4	PVVSYIAGVTAPPGK(1)R	1	2.43283e-05	59.864	1	2.43283e-05	59.864	1	5.41189e-05	58.817	3
	KFZ67_09945	262	K	Succinate--CoA ligase [ADP-forming] subunit alpha OS=Photobacterium damselae subsp. damselae OX=85581 GN=sucD PE=3 SV=1	sucD	2	2.396	4	GTAEDK(1)FAALEAAGVR	1	7.66738e-06	70.451	1	1.19744e-05	67.646	1	7.66738e-06	70.451	3
	KFZ67_07630	4	K	YvbH-like oligomerization region OS=Photobacterium damsela subsp. piscicida OX=38294 GN=BEI67_06960 PE=4 SV=1	BEI67_06960	2	1.6561	2	K(1)LASEALGLSDIGK	1	6.11477e-05	76.156	1	0.000463475	57.973	1	6.11477e-05	76.156	3
	KFZ67_09125	763	K	DNA gyrase subunit A OS=Photobacterium damselae subsp. damselae OX=85581 GN=gyrA PE=3 SV=1	gyrA	2	-1.6877	2	TELEEYPAK(1)SR	1	2.17189e-09	117.25	1	0.0030322	56.205	1	2.17189e-09	117.25	3
	KFZ67_09125	281	K	DNA gyrase subunit A OS=Photobacterium damselae subsp. damselae OX=85581 GN=gyrA PE=3 SV=1	gyrA	2	1.5325	3	IAELVK(1)EK	1	0.00331694	64.711	1	0.00486141	56.916	1	0.00331694	64.711	3
	KFZ67_09125	406	K	DNA gyrase subunit A OS=Photobacterium damselae subsp. damselae OX=85581 GN=gyrA PE=3 SV=1	gyrA	2	-1.9721	3	APTPAEAK(1)AGLVAR	1	0.000297397	63.185	1	0.000297397	63.185	1	0.000787773	53.377	3
	KFZ67_08865	132	K	Threonine--tRNA ligase OS=Photobacterium damselae OX=38293 GN=thrS PE=3 SV=1	thrS	2	0.13283	3	TK(1)YQVVK	1	0.00354576	93.374	1	0.00462062	91.516	1	0.00354576	93.374	3
	KFZ67_08865	227	K	Threonine--tRNA ligase OS=Photobacterium damselae OX=38293 GN=thrS PE=3 SV=1	thrS	2	-1.0543	4	IYGTAFHDK(1)K	1	6.65082e-07	91.656	1	6.65082e-07	90.142	1	0.000136112	91.656	3
	KFZ67_08860	81	K	Translation initiation factor IF-3 OS=Photobacterium damselae OX=38293 GN=infC PE=3 SV=1	infC	2	-0.26583	3	YLFEK(1)SK	1	0.0219043	69.984	1	0.0219043	69.984	1	0.025298	67.334	3
	KFZ67_09955	99	K	Dihydrolipoyllysine-residue succinyltransferase component of 2-oxoglutarate dehydrogenase complex OS=Photobacterium damselae OX=38293 GN=BST98_09900 PE=3 SV=1	BST98_09900	3	-0.93464	4	VNAVAGEPTVDVPAGAEASPNK(1)R	1	4.15013e-11	81.977	1	1.31989e-10	74.192	1	4.15013e-11	81.977	3
	KFZ67_13575	617	K	Acetyl-coenzyme A synthetase OS=Photobacterium damselae OX=38293 GN=acs PE=3 SV=1	acs	3	2.0426	14	K(1)IATGDTSNLGDTSTLADPSVVEK	1	1.44189e-32	113.65	1	8.84848e-24	103.92	1	1.44189e-32	113.65	3
	KFZ67_05875	150	K	30S ribosomal protein S1 OS=Photobacterium damselae OX=38293 GN=rpsA PE=3 SV=1	rpsA	2	0.36541	6	DTAHLENK(1)ELEFK	1	2.06238e-65	189.99	1	2.92453e-31	153.32	1	2.06238e-65	189.99	3
	KFZ67_13575	181	K	Acetyl-coenzyme A synthetase OS=Photobacterium damselae OX=38293 GN=acs PE=3 SV=1	acs	3	-0.031305	6	IIDSNAK(1)VVITADEGVR	1	1.38491e-08	85.421	1	1.38491e-08	85.421	1	7.93262e-08	84.213	3
	KFZ67_11285	196	K	Cysteine desulfurase IscS OS=Photobacterium damselae OX=38293 GN=iscS PE=3 SV=1	iscS	3	0.77557	7	TK(1)VDLISLSAHK	1	0.000602483	65.295	1	0.000602483	65.295	1	0.000602483	65.295	3
	KFZ67_11285	194	K	Cysteine desulfurase IscS OS=Photobacterium damselae OX=38293 GN=iscS PE=3 SV=1	iscS	2	0.41134	3	LPIDVQK(1)TK	1	0.00016793	96.143	1	0.00177778	76.228	1	0.00016793	96.143	3
	KFZ67_11285	379	K	Cysteine desulfurase IscS OS=Photobacterium damselae OX=38293 GN=iscS PE=3 SV=1	iscS	2	0.69931	3	GAVEK(1)LR	1	0.0196888	71.715	1	0.0336817	60.799	1	0.0196888	71.715	3
	KFZ67_11280	22	K	Iron-sulfur cluster assembly scaffold protein IscU OS=Photobacterium damselae OX=38293 GN=nifU PE=3 SV=1	nifU	2	-1.3186	3	NVGSFDK(1)GDK	1	0.00310516	59.198	1	0.00745789	50.354	1	0.00310516	59.198	3
	KFZ67_11280	6	K	Iron-sulfur cluster assembly scaffold protein IscU OS=Photobacterium damselae OX=38293 GN=nifU PE=3 SV=1	nifU	3	0.52367	3	AYSEK(1)VIDHYENPR	1	7.42777e-13	110.51	1	7.42777e-13	110.51	1	7.01114e-07	89.231	3
	KFZ67_11280	122	K	Iron-sulfur cluster assembly scaffold protein IscU OS=Photobacterium damselae OX=38293 GN=nifU PE=3 SV=1	nifU	2	-1.5633	2	AAISDYK(1)K	1	0.0409002	43.442	1	0.0409002	43.442	1	0.0466828	41.427	3
	KFZ67_11180	182	K	Inosine-5'-monophosphate dehydrogenase OS=Photobacterium damsela subsp. piscicida OX=38294 GN=guaB PE=3 SV=1	guaB	2	1.4398	8	VEK(1)VLLVDDSFR	1	2.87563e-20	144.57	1	4.23559e-20	143.42	1	2.87563e-20	144.57	3
	KFZ67_11180	456	K	Inosine-5'-monophosphate dehydrogenase OS=Photobacterium damsela subsp. piscicida OX=38294 GN=guaB PE=3 SV=1	guaB	2	2.3404	2	TK(1)AEFVR	1	0.0220065	69.905	1	0.0305778	63.21	1	0.0220065	69.905	3
	KFZ67_11180	199	K	Inosine-5'-monophosphate dehydrogenase OS=Photobacterium damsela subsp. piscicida OX=38294 GN=guaB PE=3 SV=1	guaB	2	1.3907	3	GMITAK(1)DFQK	1	0.000432502	81.771	1	0.00180077	64.73	1	0.000432502	81.771	3
	KFZ67_11180	396	K	Inosine-5'-monophosphate dehydrogenase OS=Photobacterium damsela subsp. piscicida OX=38294 GN=guaB PE=3 SV=1	guaB	2	-1.9974	7	GMGSLGAMSK(1)GSSDR	1	3.2575e-05	63.062	1	3.2575e-05	63.062	1	0.000111114	58.658	3
	KFZ67_11180	428	K	Inosine-5'-monophosphate dehydrogenase OS=Photobacterium damsela subsp. piscicida OX=38294 GN=guaB PE=3 SV=1	guaB	2	0.31805	2	GHLK(1)EIVHQQMGGLR	1	3.31439e-06	76.311	1	3.31439e-06	76.311	1	0.00245776	40.278	3
	KFZ67_11180	177	K	Inosine-5'-monophosphate dehydrogenase OS=Photobacterium damsela subsp. piscicida OX=38294 GN=guaB PE=3 SV=1	guaB	2	-1.9088	2	EEVEAIMQK(1)HR	1	0.00193172	47.894	1	0.00866644	43.958	1	0.00193172	47.894	3
	KFZ67_11825	126	K	Deoxyribose-phosphate aldolase OS=Photobacterium damsela subsp. piscicida OX=38294 GN=deoC PE=3 SV=1	deoC	2	-0.85709	2	QCK(1)AACGDNVQLK	1	3.36888e-05	83.54	1	3.36888e-05	83.54	1	0.00075333	60.549	3
	KFZ67_11340	392	K	Isocitrate lyase OS=Photobacterium damselae OX=38293 GN=aceA PE=4 SV=1	aceA	3	0.27967	13	REFESADK(1)GYTFVAHQQEVGTGYFDK	1	6.53721e-64	157.24	1	2.20174e-52	143.27	1	6.53721e-64	157.24	3
	KFZ67_11825	37	K	Deoxyribose-phosphate aldolase OS=Photobacterium damsela subsp. piscicida OX=38294 GN=deoC PE=3 SV=1	deoC	3	-0.3992	3	NAK(1)TAVGNTAAVCIYPR	1	2.62499e-29	137.17	1	2.62499e-29	137.17	1	7.24908e-23	124.25	3
	KFZ67_11175	358	K	GMP synthase [glutamine-hydrolyzing] OS=Photobacterium damselae OX=38293 GN=guaA PE=3 SV=1	guaA	4	1.4048	5	AHVIK(1)SHHNVGGLPDDMQMGLVEPLK	1	6.96485e-17	91.416	1	2.77991e-11	76.799	1	6.96485e-17	91.416	3
	KFZ67_11160	9	K	S-(hydroxymethyl)glutathione dehydrogenase OS=Photobacterium damselae OX=38293 GN=frmA PE=3 SV=1	frmA	3	-0.30791	5	SK(1)AAVAWGPNQPLSIEEVDVMLPR	1	1.08452e-51	135.76	1	1.57407e-33	121.38	1	1.08452e-51	135.76	3
	KFZ67_11160	107	K	S-(hydroxymethyl)glutathione dehydrogenase OS=Photobacterium damselae OX=38293 GN=frmA PE=3 SV=1	frmA	2	0.21654	5	SGK(1)TNLCQAVR	1	3.90278e-27	151.66	1	3.90278e-27	151.66	1	2.3838e-19	138.99	3
	KFZ67_11160	323	K	S-(hydroxymethyl)glutathione dehydrogenase OS=Photobacterium damselae OX=38293 GN=frmA PE=3 SV=1	frmA	2	-0.41474	4	GSAFGGVK(1)GR	1	1.39655e-07	113.67	1	0.000179385	90.15	1	1.39655e-07	113.67	3
	KFZ67_11135	267	K	Phosphoribosylformylglycinamidine synthase OS=Photobacterium damselae subsp. damselae OX=85581 GN=purL PE=3 SV=1	purL	2	2.2273	7	DNAAVMTGSK(1)VGR	1	0.000164041	72.681	1	0.00029204	70.889	1	0.000164041	72.681	3
	KFZ67_11120	62	K	Serine hydroxymethyltransferase OS=Photobacterium damsela subsp. piscicida OX=38294 GN=glyA PE=3 SV=1	glyA	2	-0.91322	5	YAEGYPGK(1)R	1	7.58099e-08	120.15	1	1.51613e-07	117.89	1	7.58099e-08	120.15	3
	KFZ67_11120	410	K	Serine hydroxymethyltransferase OS=Photobacterium damsela subsp. piscicida OX=38294 GN=glyA PE=3 SV=1	glyA	2	0.7709	4	VLEICK(1)R	1	1.18019e-06	119.57	1	1.18019e-06	119.57	1	0.000192935	107.43	3
	KFZ67_11120	325	K	Serine hydroxymethyltransferase OS=Photobacterium damsela subsp. piscicida OX=38294 GN=glyA PE=3 SV=1	glyA	3	-0.2402	3	IVSGSTENHLFLVDLIDK(1)GITGK	1	1.83922e-11	83.826	1	2.09806e-07	69.071	1	1.83922e-11	83.826	3
	KFZ67_11120	330	K	Serine hydroxymethyltransferase OS=Photobacterium damsela subsp. piscicida OX=38294 GN=glyA PE=3 SV=1	glyA	3	-0.81801	3	GITGK(1)EADAALGAANITVNK	1	1.61841e-10	82.482	1	1.61841e-10	82.482	1	6.2005e-10	73.688	3
	KFZ67_11120	345	K	Serine hydroxymethyltransferase OS=Photobacterium damsela subsp. piscicida OX=38294 GN=glyA PE=3 SV=1	glyA	3	-0.038057	4	EADAALGAANITVNK(1)NSVPNDPR	1	6.56601e-45	143.4	1	6.56601e-45	143.4	1	2.16302e-35	128.67	3
	KFZ67_11100	184	K	3,4-dihydroxy-2-butanone 4-phosphate synthase OS=Photobacterium damselae subsp. damselae OX=85581 GN=ribB PE=3 SV=1	ribB	3	-0.20264	3	RPQLEVFAEK(1)HGLK	1	2.8285e-10	106.42	1	4.69149e-07	93.478	1	2.8285e-10	106.42	3
	KFZ67_11095	2	K	6,7-dimethyl-8-ribityllumazine synthase OS=Photobacterium damsela subsp. piscicida OX=38294 GN=ribE PE=3 SV=1	ribE	2	0.58833	4	MK(1)VIEGAIAAPNAK	1	7.24727e-05	75.589	1	0.000746027	54.09	1	7.24727e-05	75.589	3
	KFZ67_11095	39	K	6,7-dimethyl-8-ribityllumazine synthase OS=Photobacterium damsela subsp. piscicida OX=38294 GN=ribE PE=3 SV=1	ribE	3	0.96926	2	FNSFINESLLSGALDALK(1)R	1	6.759e-07	66.606	1	2.44217e-05	58.024	1	6.759e-07	66.606	3
	KFZ67_11825	166	K	Deoxyribose-phosphate aldolase OS=Photobacterium damsela subsp. piscicida OX=38294 GN=deoC PE=3 SV=1	deoC	2	0.91656	3	AGADFIK(1)TSTGK	1	0.00279747	51.726	1	0.00719204	44.511	1	0.00279747	51.726	3
	KFZ67_10965	296	K	Na(+)-translocating NADH-quinone reductase subunit F OS=Photobacterium damselae OX=38293 GN=nqrF PE=3 SV=1	nqrF	2	1.3458	2	SHIFDQLK(1)R	1	0.000754194	83.998	1	0.00180947	74.173	1	0.000754194	83.998	3
	KFZ67_11340	326	K	Isocitrate lyase OS=Photobacterium damselae OX=38293 GN=aceA PE=4 SV=1	aceA	3	0.076561	8	FAEAIHAQYPDQILAYNCSPSFNWEK(1)NLDAK	1	3.88248e-36	118.11	1	5.27039e-36	116.57	1	3.88248e-36	118.11	3
	KFZ67_11340	64	K	Isocitrate lyase OS=Photobacterium damselae OX=38293 GN=aceA PE=4 SV=1	aceA	2	0.46944	11	LWDLINGSAK(1)K	1	3.21812e-09	113.22	1	3.4529e-09	113.22	1	3.21812e-09	113.22	3
	KFZ67_11770	331	K	Energy-dependent translational throttle protein EttA OS=Photobacterium damselae OX=38293 GN=BST98_11750 PE=4 SV=1	BST98_11750	2	0.86838	3	NLTK(1)SFGDR	1	7.21228e-05	100.25	1	0.000494486	89.08	1	7.21228e-05	100.25	3
	KFZ67_11750	39	K	Helix-turn-helix domain OS=Photobacterium damselae OX=38293 GN=BST98_11720 PE=4 SV=1	BST98_11720	2	1.5633	3	LSGK(1)YGIEVR	1	1.92064e-07	110.39	1	7.2115e-05	96.113	1	1.92064e-07	110.39	3
	KFZ67_11750	12	K	Helix-turn-helix domain OS=Photobacterium damselae OX=38293 GN=BST98_11720 PE=4 SV=1	BST98_11720	2	-1.5361	2	LAK(1)IQGISQK	1	0.000234875	87.066	1	0.000501556	80.24	1	0.000234875	87.066	3
	KFZ67_11605	359	K	Chaperone protein DnaK OS=Photobacterium damsela subsp. piscicida OX=38294 GN=dnaK PE=2 SV=1	dnaK	2	-1.2893	4	VAEFFGK(1)EAR	1	1.00333e-24	148.32	1	1.11469e-17	142.83	1	1.00333e-24	148.32	3
	KFZ67_11605	55	K	Chaperone protein DnaK OS=Photobacterium damsela subsp. piscicida OX=38294 GN=dnaK PE=2 SV=1	dnaK	3	0.69346	5	TTASVIAYAQDGEILVGQPAK(1)R	1	1.05806e-53	151.63	1	1.05806e-53	151.63	1	1.81344e-35	132.67	3
	KFZ67_11605	70	K	Chaperone protein DnaK OS=Photobacterium damsela subsp. piscicida OX=38294 GN=dnaK PE=2 SV=1	dnaK	2	-0.53117	2	QAVTNPENTLFAIK(1)R	1	2.56398e-28	134.88	1	5.79575e-22	124.16	1	2.56398e-28	134.88	3
	KFZ67_11605	421	K	Chaperone protein DnaK OS=Photobacterium damsela subsp. piscicida OX=38294 GN=dnaK PE=2 SV=1	dnaK	4	0.39019	2	NTTIPTK(1)ASQVFSTAEDNQNAVTIHVLQGER	1	1.49583e-09	63.316	1	1.49583e-09	63.316	1	1.73522e-09	61.725	3
	KFZ67_11605	414	K	Chaperone protein DnaK OS=Photobacterium damsela subsp. piscicida OX=38294 GN=dnaK PE=2 SV=1	dnaK	2	-0.081557	4	LIEK(1)NTTIPTK	1	0.000574225	71.176	1	0.00225448	58.781	1	0.000574225	71.176	3
	KFZ67_11605	95	K	Chaperone protein DnaK OS=Photobacterium damsela subsp. piscicida OX=38294 GN=dnaK PE=2 SV=1	dnaK	2	-3.8058	17	IVK(1)ADNGDAWVEAK	1	1.34286e-06	85.909	1	1.34286e-06	85.909	1	7.04974e-06	84.753	3
	KFZ67_11605	183	K	Chaperone protein DnaK OS=Photobacterium damsela subsp. piscicida OX=38294 GN=dnaK PE=2 SV=1	dnaK	3	0.063181	5	IINEPTAAALAYGLDK(1)K	1	3.48245e-09	92.236	1	2.66515e-07	81.157	1	3.48245e-09	92.236	3
	KFZ67_11605	294	K	Chaperone protein DnaK OS=Photobacterium damsela subsp. piscicida OX=38294 GN=dnaK PE=2 SV=1	dnaK	3	1.6391	5	IELSSAQQTDVNLPYITADATGPK(1)HMNIK	1	8.87307e-10	70.67	1	2.77334e-07	57.347	1	8.87307e-10	70.67	3
	KFZ67_11605	166	K	Chaperone protein DnaK OS=Photobacterium damsela subsp. piscicida OX=38294 GN=dnaK PE=2 SV=1	dnaK	2	-0.51801	3	IAGLDVK(1)R	1	3.08255e-11	129.56	1	1.44172e-08	122.18	1	3.08255e-11	129.56	3
	KFZ67_11605	121	K	Chaperone protein DnaK OS=Photobacterium damsela subsp. piscicida OX=38294 GN=dnaK PE=2 SV=1	dnaK	2	0.05176	7	MAAPQVSAEVLK(1)K	1	2.68218e-06	85.554	1	2.68218e-06	85.554	1	0.000132132	76.073	3
	KFZ67_11340	54	K	Isocitrate lyase OS=Photobacterium damselae OX=38293 GN=aceA PE=4 SV=1	aceA	2	-0.11787	12	GADK(1)LWDLINGSAK	1	2.13262e-10	107.46	1	9.2498e-07	89.624	1	2.13262e-10	107.46	3
	KFZ67_11605	109	K	Chaperone protein DnaK OS=Photobacterium damsela subsp. piscicida OX=38294 GN=dnaK PE=2 SV=1	dnaK	2	0.17008	3	GQK(1)MAAPQVSAEVLK	1	1.39276e-05	67.415	1	0.000104394	57.148	1	1.39276e-05	67.415	3
	KFZ67_11600	295	K	Chaperone protein DnaJ OS=Photobacterium damselae OX=38293 GN=dnaJ PE=3 SV=1	dnaJ	2	0.47922	5	VNLK(1)VPSETQTGR	1	1.09834e-06	93.348	1	1.09834e-06	93.348	1	7.39726e-05	80.905	3
	KFZ67_11600	46	K	Chaperone protein DnaJ OS=Photobacterium damselae OX=38293 GN=dnaJ PE=3 SV=1	dnaJ	2	-0.057272	3	NQGDEQAAEK(1)FK	1	0.00127949	60.157	1	0.00248745	53.448	1	0.00127949	60.157	3
	KFZ67_11600	194	K	Chaperone protein DnaJ OS=Photobacterium damselae OX=38293 GN=dnaJ PE=3 SV=1	dnaJ	2	-1.1198	3	GK(1)IITDPCGK	1	0.015119	45.433	1	0.015119	45.433	1	0.015119	45.433	3
	KFZ67_11600	354	K	Chaperone protein DnaJ OS=Photobacterium damselae OX=38293 GN=dnaJ PE=3 SV=1	dnaJ	2	-1.1808	4	ELEETFDGK(1)AASK	1	0.00312444	46.282	1	0.00568489	41.577	1	0.00312444	46.282	3
	KFZ67_11355	166	K	Peroxidase OS=Photobacterium damselae OX=38293 GN=tsaA_1 PE=4 SV=1	tsaA_1	3	-0.98707	7	MVDALNFHQK(1)HGEVCPAQWEEGK	1	2.84397e-11	82.885	1	8.5167e-11	77.576	1	2.84397e-11	82.885	3
	KFZ67_11345	347	K	Malate synthase OS=Photobacterium damselae OX=38293 GN=aceB PE=3 SV=1	aceB	2	1.836	6	NAWVLNK(1)IQTDK	1	1.25726e-11	122.34	1	1.25726e-11	122.34	1	3.1641e-10	120.53	3
	KFZ67_11345	352	K	Malate synthase OS=Photobacterium damselae OX=38293 GN=aceB PE=3 SV=1	aceB	4	-1.2304	2	IQTDK(1)SLEAHNGHDGTWVAHPGLADTAR	1	1.64713e-07	59.372	1	1.64713e-07	59.372	1	4.84233e-07	56.172	3
	KFZ67_11345	156	K	Malate synthase OS=Photobacterium damselae OX=38293 GN=aceB PE=3 SV=1	aceB	3	0.70886	6	HYQLK(1)EDPAVLICR	1	1.58213e-23	136.24	1	2.2046e-17	125.53	1	1.58213e-23	136.24	3
	KFZ67_11340	212	K	Isocitrate lyase OS=Photobacterium damselae OX=38293 GN=aceA PE=4 SV=1	aceA	2	-2.4183	3	VLVPTQEAVQK(1)LVAAR	1	9.54334e-13	108.58	1	5.31996e-06	71.98	1	9.54334e-13	108.58	3
	KFZ67_11340	250	K	Isocitrate lyase OS=Photobacterium damselae OX=38293 GN=aceA PE=4 SV=1	aceA	3	0.95001	7	TDANAADLLTSDCDPYDK(1)DFIVGER	1	1.12642e-23	98.299	1	3.23986e-07	61.417	1	1.12642e-23	98.299	3
	KFZ67_11340	65	K	Isocitrate lyase OS=Photobacterium damselae OX=38293 GN=aceA PE=4 SV=1	aceA	3	-1.2379	4	K(1)GYVNCLGALTGGQAVQQAK	1	3.01126e-55	164.93	1	8.73608e-45	147.09	1	3.01126e-55	164.93	3
	KFZ67_11340	300	K	Isocitrate lyase OS=Photobacterium damselae OX=38293 GN=aceA PE=4 SV=1	aceA	3	-1.0828	11	K(1)FAEAIHAQYPDQILAYNCSPSFNWEK	1	7.91085e-34	120.15	1	2.99711e-24	100.24	1	7.91085e-34	120.15	3
	KFZ67_11340	193	K	Isocitrate lyase OS=Photobacterium damselae OX=38293 GN=aceA PE=4 SV=1	aceA	3	0.5808	17	HMIEAGAAGVHFEDQLASVK(1)K	1	3.27818e-44	142.43	1	3.27818e-44	142.43	1	2.72949e-36	134.52	3
	KFZ67_11605	106	K	Chaperone protein DnaK OS=Photobacterium damsela subsp. piscicida OX=38294 GN=dnaK PE=2 SV=1	dnaK	2	0.70976	6	ADNGDAWVEAK(1)GQK	1	7.2327e-08	97.203	1	2.98215e-07	95.195	1	7.2327e-08	97.203	3
	KFZ67_11240	16	K	Nucleoside diphosphate kinase OS=Photobacterium damselae OX=38293 GN=ndk PE=3 SV=1	ndk	2	0.78342	3	TFSIVKPDAVK(1)R	0.999988	6.46098e-05	90.434	0.999988	6.46098e-05	90.434	0.999405	0.000108127	85.522	3
	KFZ67_10945	209	K	Aminoacyl-histidine dipeptidase OS=Photobacterium damselae OX=38293 GN=BST98_10870 PE=4 SV=1	BST98_10870	2	-0.0076487	3	LVIK(1)GLK	1	0.0173946	73.665	1	0.0336817	60.799	1	0.0173946	73.665	3
	KFZ67_10935	108	K	Xanthine phosphoribosyltransferase OS=Photobacterium damsela subsp. piscicida OX=38294 GN=gpt PE=3 SV=1	gpt	2	1.0151	3	GK(1)FVTVCAK	1	0.0114363	52.49	1	0.0114363	52.49	1	0.0114363	52.49	3
	KFZ67_12530	32	K	Ornithine carbamoyltransferase OS=Photobacterium damselae OX=38293 GN=argF PE=3 SV=1	argF	3	0.017327	7	EIQHLLELSAELK(1)K	1	3.10418e-10	105.19	1	4.34422e-07	92.939	1	3.10418e-10	105.19	3
	KFZ67_12530	35	K	Ornithine carbamoyltransferase OS=Photobacterium damselae OX=38293 GN=argF PE=3 SV=1	argF	2	-0.58233	9	AK(1)YNGYEQPR	1	3.62913e-05	99.283	1	0.000103609	94.363	1	3.62913e-05	99.283	3
	KFZ67_12520	3	K	Arginine deiminase OS=Photobacterium damsela subsp. piscicida OX=38294 GN=arcA PE=3 SV=1	arcA	2	-2.107	5	SK(1)FYVGSEIGQLR	1	1.51683e-09	101.53	1	1.51683e-09	101.53	1	1.55416e-09	101.32	3
	KFZ67_12495	209	K	Valine--tRNA ligase OS=Photobacterium damselae OX=38293 GN=valS PE=3 SV=1	valS	2	-0.70813	2	YPLADGVK(1)TADGK	1	0.000386924	51.009	1	0.000386924	51.009	1	0.00190264	48.527	3
	KFZ67_12495	243	K	Valine--tRNA ligase OS=Photobacterium damselae OX=38293 GN=valS PE=3 SV=1	valS	2	0.1056	3	YK(1)DLIGK	1	0.0367198	58.596	1	0.0530601	47.657	1	0.0367198	58.596	3
	KFZ67_12495	342	K	Valine--tRNA ligase OS=Photobacterium damselae OX=38293 GN=valS PE=3 SV=1	valS	4	1.4054	3	K(1)AIVAEFDELGLLEEIKDHDLQVPYGDR	1	8.76996e-26	98.84	0.999997	1.19955e-12	73.753	1	8.76996e-26	98.84	3
	KFZ67_12325	19	K	Iron-sulfur cluster insertion protein ErpA OS=Photobacterium damselae OX=38293 GN=erpA PE=3 SV=1	erpA	2	-1.6073	3	VK(1)TLIAEEENPDLK	1	7.04974e-06	84.753	1	0.000279733	64.04	1	7.04974e-06	84.753	3
	KFZ67_11930	83	K	30S ribosomal protein S15 OS=Photobacterium damselae OX=38293 GN=rpsO PE=3 SV=1	rpsO	2	0.98666	3	YQDLIK(1)R	1	1.09329e-23	158.08	1	1.09329e-23	158.08	1	5.12375e-16	143	3
	KFZ67_11930	71	K	30S ribosomal protein S15 OS=Photobacterium damselae OX=38293 GN=rpsO PE=3 SV=1	rpsO	2	-0.20172	8	LLDYLK(1)GK	1	0.00312276	80.438	1	0.00312276	80.438	1	0.00644934	71.501	3
	KFZ67_12220	266	K	Threonine synthase OS=Photobacterium damselae OX=38293 GN=BST98_12205 PE=4 SV=1	BST98_12205	2	0.3896	3	AIGLPVK(1)R	1	0.000849655	89.55	1	0.0030927	79.469	1	0.000849655	89.55	3
	KFZ67_12140	10	K	Lysine--tRNA ligase OS=Photobacterium damselae OX=38293 GN=lysS PE=3 SV=1	lysS	2	0.21462	3	TDQVQDENK(1)LIAER	1	8.13915e-10	99.927	1	8.13915e-10	99.927	1	4.34702e-05	79.652	3
	KFZ67_12140	92	K	Lysine--tRNA ligase OS=Photobacterium damselae OX=38293 GN=lysS PE=3 SV=1	lysS	2	0.11828	3	IQAYASK(1)DVQK	1	0.000328187	74.611	1	0.000328187	74.611	1	0.00149836	61.932	3
	KFZ67_12140	145	K	Lysine--tRNA ligase OS=Photobacterium damselae OX=38293 GN=lysS PE=3 SV=1	lysS	4	0.41329	3	ALRPLPEK(1)FHGLTDQEMR	1	1.7499e-09	81.51	1	2.15147e-06	61.757	1	1.7499e-09	81.51	3
	KFZ67_12530	292	K	Ornithine carbamoyltransferase OS=Photobacterium damselae OX=38293 GN=argF PE=3 SV=1	argF	2	0.39978	4	ELAK(1)EYPVLAK	1	0.00110751	65.842	1	0.00110751	65.842	1	0.00110751	65.842	3
	KFZ67_12065	64	K	30S ribosomal protein S20 OS=Photobacterium damsela subsp. piscicida OX=38294 GN=rpsT PE=3 SV=1	rpsT	2	-0.47999	3	MATK(1)GLIHK	1	5.32413e-05	99.013	1	0.00806774	51.445	1	5.32413e-05	99.013	3
	KFZ67_12030	93	K	4-hydroxy-tetrahydrodipicolinate reductase OS=Photobacterium damselae OX=38293 GN=dapB PE=3 SV=1	dapB	3	0.033065	6	AHQK(1)AIVIGTTGFTEQER	1	1.20668e-15	102.55	1	1.10197e-11	88.637	1	1.20668e-15	102.55	3
	KFZ67_12025	330	K	Carbamoyl-phosphate synthase small chain OS=Photobacterium damsela subsp. piscicida OX=38294 GN=carA PE=3 SV=1	carA	4	-1.7003	5	ATHK(1)SLFDGSLQGIHR	1	1.91518e-08	88.768	1	1.58591e-06	77.746	1	1.91518e-08	88.768	3
	KFZ67_11950	117	K	Transcription termination/antitermination protein NusA OS=Photobacterium damsela subsp. piscicida OX=38294 GN=nusA PE=3 SV=1	nusA	2	-2.5871	2	QVIVQK(1)VR	1	2.00128e-16	137.18	1	9.22903e-05	102.07	1	2.00128e-16	137.18	3
	KFZ67_11950	347	K	Transcription termination/antitermination protein NusA OS=Photobacterium damsela subsp. piscicida OX=38294 GN=nusA PE=3 SV=1	nusA	2	-0.25637	2	K(1)HQEEAQESIDTFTK	1	0.000733414	46.89	1	0.00178644	41.542	1	0.000733414	46.89	3
	KFZ67_11945	546	K	Translation initiation factor IF-2 OS=Photobacterium damselae OX=38293 GN=infB PE=3 SV=1	infB	2	0.57592	3	IDK(1)EGANPDNVK	1	0.00132752	68.171	1	0.00132752	68.171	1	0.00167243	65.173	3
	KFZ67_11945	849	K	Translation initiation factor IF-2 OS=Photobacterium damselae OX=38293 GN=infB PE=3 SV=1	infB	2	1.134	3	DVFK(1)SPK	1	0.0145569	77.282	1	0.0145569	77.282	1	0.0426636	52.786	3
	KFZ67_11945	448	K	Translation initiation factor IF-2 OS=Photobacterium damselae OX=38293 GN=infB PE=3 SV=1	infB	3	-0.13316	5	APVVTIMGHVDHGK(1)TSTLDYIR	1	1.4028e-76	174.82	1	1.43993e-16	96.016	1	1.4028e-76	174.82	3
	KFZ67_11945	51	K	Translation initiation factor IF-2 OS=Photobacterium damselae OX=38293 GN=infB PE=3 SV=1	infB	3	-0.30975	2	QTLLSHLQK(1)EHGGNVSADGAPTR	1	1.17771e-05	58.964	1	1.17771e-05	58.964	1	0.000356081	43.349	3
	KFZ67_11945	42	K	Translation initiation factor IF-2 OS=Photobacterium damselae OX=38293 GN=infB PE=3 SV=1	infB	3	0.59237	4	ADDNVSQTEK(1)QTLLSHLQK	1	4.67923e-08	72.772	1	2.27068e-07	70.837	1	4.67923e-08	72.772	3
	KFZ67_11940	83	K	Ribosome-binding factor A OS=Photobacterium damselae OX=38293 GN=rbfA PE=3 SV=1	rbfA	2	0.31461	3	SLLGK(1)QIR	1	7.0168e-07	111.82	1	0.000127136	98.997	1	7.0168e-07	111.82	3
	KFZ67_11940	113	K	Ribosome-binding factor A OS=Photobacterium damselae OX=38293 GN=rbfA PE=3 SV=1	rbfA	2	-0.34633	2	ISNLVSK(1)VVR	1	0.00076913	74.306	1	0.00138224	68.355	1	0.00076913	74.306	3
	KFZ67_00020	375	K	DNA gyrase subunit B OS=Photobacterium damselae OX=38293 GN=gyrB PE=3 SV=1	gyrB	2	0.69556	3	TVCTK(1)IIDASR	1	3.94632e-33	141.71	1	3.94632e-33	141.71	1	1.88953e-05	86.911	3
	KFZ67_13575	585	K	Acetyl-coenzyme A synthetase OS=Photobacterium damselae OX=38293 GN=acs PE=3 SV=1	acs	3	-0.53717	2	K(1)EIGPIATPDFLHWTDALPK	1	8.15194e-07	64.843	1	8.15194e-07	64.843	1	8.46284e-07	64.522	3
	KFZ67_12050	418	K	Isoleucine--tRNA ligase OS=Photobacterium damselae OX=38293 GN=ileS PE=3 SV=1	ileS	3	-0.4391	3	HK(1)TPIIFR	1	0.0350659	42.599	1	0.0350659	42.599	1	0.0350659	42.599	3
	KFZ67_10945	58	K	Aminoacyl-histidine dipeptidase OS=Photobacterium damselae OX=38293 GN=BST98_10870 PE=4 SV=1	BST98_10870	2	0.11689	3	DNVGNVIIK(1)K	1	0.000416909	81.017	1	0.000416909	81.017	1	0.00216953	64.82	3
	KFZ67_12530	153	K	Ornithine carbamoyltransferase OS=Photobacterium damselae OX=38293 GN=argF PE=3 SV=1	argF	3	0.16513	4	GK(1)QLHEITFAYLGDAR	1	1.88664e-22	127.2	1	1.88664e-22	127.2	1	1.88664e-22	127.2	3
	KFZ67_12530	47	K	Ornithine carbamoyltransferase OS=Photobacterium damselae OX=38293 GN=argF PE=3 SV=1	argF	2	2.2113	2	LTGK(1)NIALIFEK	1	1.70535e-07	107.2	1	1.70535e-07	107.2	1	2.78475e-06	95.264	3
	KFZ67_10935	115	K	Xanthine phosphoribosyltransferase OS=Photobacterium damsela subsp. piscicida OX=38294 GN=gpt PE=3 SV=1	gpt	2	-0.69173	3	FVTVCAK(1)PAGK	1	3.52335e-06	96.745	1	0.00144499	62.466	1	3.52335e-06	96.745	3
	KFZ67_11810	54	K	Purine nucleoside phosphorylase DeoD-type OS=Photobacterium damselae OX=38293 GN=deoD PE=3 SV=1	deoD	2	-3.4177	7	NMYGYTGTYK(1)GR	1	9.90855e-21	146.16	1	5.01143e-10	117.86	1	9.90855e-21	146.16	3
	KFZ67_11925	668	K	Polyribonucleotide nucleotidyltransferase OS=Photobacterium damselae OX=38293 GN=pnp PE=3 SV=1	pnp	2	-0.16753	7	VSDYLK(1)EGQEVPVK	1	9.82518e-05	72.815	1	0.000407822	59.864	1	9.82518e-05	72.815	3
	KFZ67_11925	629	K	Polyribonucleotide nucleotidyltransferase OS=Photobacterium damselae OX=38293 GN=pnp PE=3 SV=1	pnp	2	1.4084	4	IYTGK(1)VTR	1	1.72299e-16	138.54	1	1.72299e-16	138.54	1	2.07921e-16	136.8	3
	KFZ67_11925	80	K	Polyribonucleotide nucleotidyltransferase OS=Photobacterium damselae OX=38293 GN=pnp PE=3 SV=1	pnp	2	-0.15771	2	IPGGFFK(1)R	1	0.00073499	90.862	1	0.0156048	56.721	1	0.00073499	90.862	3
	KFZ67_11925	565	K	Polyribonucleotide nucleotidyltransferase OS=Photobacterium damselae OX=38293 GN=pnp PE=3 SV=1	pnp	2	-2.2427	2	INPEK(1)IK	1	0.0255085	67.169	1	0.0422154	54.611	1	0.0255085	67.169	3
	KFZ67_11925	560	K	Polyribonucleotide nucleotidyltransferase OS=Photobacterium damselae OX=38293 GN=pnp PE=3 SV=1	pnp	2	-1.2701	10	IHTMK(1)INPEK	1	4.25847e-18	145.41	1	4.25847e-18	145.41	1	2.68281e-17	136.96	3
	KFZ67_11925	607	K	Polyribonucleotide nucleotidyltransferase OS=Photobacterium damselae OX=38293 GN=pnp PE=3 SV=1	pnp	2	0.87533	11	IAATDGLQAK(1)EAIR	1	8.83188e-66	190.27	1	8.83188e-66	190.27	1	8.83188e-66	190.27	3
	KFZ67_11925	528	K	Polyribonucleotide nucleotidyltransferase OS=Photobacterium damselae OX=38293 GN=pnp PE=3 SV=1	pnp	2	-1.7617	6	EIMQIALNQAK(1)GAR	1	4.98097e-80	205.8	1	1.10095e-31	154.28	1	4.98097e-80	205.8	3
	KFZ67_11925	572	K	Polyribonucleotide nucleotidyltransferase OS=Photobacterium damselae OX=38293 GN=pnp PE=3 SV=1	pnp	2	0.1483	11	DVIGK(1)GGAVIR	1	3.93882e-11	122.33	1	3.93882e-11	122.33	1	4.22804e-09	112.36	3
	KFZ67_12730	59	K	Pyruvate kinase OS=Photobacterium damsela subsp. piscicida OX=38294 GN=pykF PE=3 SV=1	pykF	2	0.23093	3	NTGK(1)QLAILLDTK	1	0.00035064	69.516	1	0.00160987	51.03	1	0.00035064	69.516	3
	KFZ67_12730	389	K	Pyruvate kinase OS=Photobacterium damsela subsp. piscicida OX=38294 GN=pykF PE=3 SV=1	pykF	2	-1.2335	3	K(1)YFPTAR	1	4.84642e-11	133.81	1	4.84642e-11	133.81	1	2.52483e-10	130.04	3
	KFZ67_12730	360	K	Pyruvate kinase OS=Photobacterium damsela subsp. piscicida OX=38294 GN=pykF PE=3 SV=1	pykF	2	1.4009	5	ITEAVCK(1)GAVDTAEK	1	1.75211e-22	131.86	1	1.75211e-22	131.86	1	1.90816e-17	119.65	3
	KFZ67_12530	263	K	Ornithine carbamoyltransferase OS=Photobacterium damselae OX=38293 GN=argF PE=3 SV=1	argF	3	1.565	3	INLMLPYQVNMDVIK(1)ATGNPHVK	1	0.000129028	47.564	1	0.000169205	46.818	1	0.000129028	47.564	3
	KFZ67_12730	434	K	Pyruvate kinase OS=Photobacterium damsela subsp. piscicida OX=38294 GN=pykF PE=3 SV=1	pykF	2	0.11361	2	GK(1)ELALETGLGAK	1	0.000105945	78.814	1	0.000105945	78.814	1	0.000137832	76.728	3
	KFZ67_12485	185	K	Probable cytosol aminopeptidase OS=Photobacterium damsela subsp. piscicida OX=38294 GN=pepA PE=3 SV=1	pepA	3	1.5628	3	AINHGLSISSGVK(1)AAK	1	3.63417e-05	59.673	1	0.000164885	51.466	1	3.63417e-05	59.673	3
	KFZ67_12690	377	K	RNA polymerase sigma factor RpoD OS=Photobacterium damselae OX=38293 GN=rpoD PE=3 SV=1	rpoD	2	0.26803	3	MSIGEAK(1)AR	1	0.00109004	81.95	1	0.00124171	80.688	1	0.00109004	81.95	3
	KFZ67_12680	34	K	GatB/YqeY domain-containing protein OS=Photobacterium damsela subsp. piscicida OX=38294 GN=BEI67_14975 PE=4 SV=1	BEI67_14975	2	0.84208	3	LALAAIK(1)QR	1	3.87771e-34	170.66	1	4.62947e-17	141.39	1	3.87771e-34	170.66	3
	KFZ67_12675	25	K	30S ribosomal protein S21 OS=Photobacterium angustum OX=661 GN=rpsU PE=3 SV=1	rpsU	2	-2.7687	4	SCEK(1)AGILSEVR	1	1.61797e-33	142.97	1	7.06546e-11	99.844	1	1.61797e-33	142.97	3
	KFZ67_12600	384	K	Bifunctional protein HldE OS=Photobacterium damsela subsp. piscicida OX=38294 GN=hldE PE=3 SV=1	hldE	3	1.7897	2	LIVAVNSDASVQALK(1)GPGRPVNPEDR	1	1.81634e-37	112.85	1	1.81634e-37	112.85	1	2.13975e-16	79.69	3
	KFZ67_12540	143	K	Aspartate carbamoyltransferase regulatory chain OS=Photobacterium damsela subsp. piscicida OX=38294 GN=pyrI PE=3 SV=1	pyrI	2	-0.53255	7	YCEK(1)VFSR	1	1.67406e-16	138.78	1	2.9976e-07	117.89	1	1.67406e-16	138.78	3
	KFZ67_12540	31	K	Aspartate carbamoyltransferase regulatory chain OS=Photobacterium damsela subsp. piscicida OX=38294 GN=pyrI PE=3 SV=1	pyrI	3	-0.23113	3	VLK(1)LFGMHK	1	0.0212044	42.311	1	0.0212044	42.311	1	0.0235481	42.19	3
	KFZ67_12540	13	K	Aspartate carbamoyltransferase regulatory chain OS=Photobacterium damsela subsp. piscicida OX=38294 GN=pyrI PE=3 SV=1	pyrI	3	-1.3928	4	LQVEAIK(1)NGSVIDHIPANIGIK	1	1.395e-10	76.492	1	1.395e-10	76.492	1	5.98323e-07	63.869	3
	KFZ67_12540	93	K	Aspartate carbamoyltransferase regulatory chain OS=Photobacterium damsela subsp. piscicida OX=38294 GN=pyrI PE=3 SV=1	pyrI	2	0.80341	3	ATVNQIENYEVVK(1)K	1	7.86354e-05	73.415	1	0.000158826	68.972	1	7.86354e-05	73.415	3
	KFZ67_12535	43	K	Aspartate carbamoyltransferase OS=Photobacterium damsela subsp. piscicida OX=38294 GN=pyrB PE=3 SV=1	pyrB	2	-2.6208	6	NK(1)VVASCFFEPSTR	1	2.0176e-31	150.11	1	2.0176e-31	150.11	1	1.25576e-23	140.82	3
	KFZ67_12535	280	K	Aspartate carbamoyltransferase OS=Photobacterium damsela subsp. piscicida OX=38294 GN=pyrB PE=3 SV=1	pyrB	3	-0.28782	3	IDEITTDVDK(1)TPHAYYFQQAENGVYAR	1	7.8805e-08	63.701	1	4.62148e-06	56.688	1	7.8805e-08	63.701	3
	KFZ67_12535	30	K	Aspartate carbamoyltransferase OS=Photobacterium damsela subsp. piscicida OX=38294 GN=pyrB PE=3 SV=1	pyrB	3	3.0556	3	DELELVVETAGK(1)LK	1	6.04974e-07	90.412	1	6.04974e-07	90.412	1	6.99352e-05	72.891	3
	KFZ67_12530	55	K	Ornithine carbamoyltransferase OS=Photobacterium damselae OX=38293 GN=argF PE=3 SV=1	argF	2	-0.79345	4	NIALIFEK(1)TSTR	1	6.04315e-48	172.13	1	6.04315e-48	172.13	1	1.18538e-37	170.04	3
	KFZ67_12485	6	K	Probable cytosol aminopeptidase OS=Photobacterium damsela subsp. piscicida OX=38294 GN=pepA PE=3 SV=1	pepA	2	2.6959	4	MEFSVK(1)SGSPEK	1	0.00117137	69.352	1	0.00117137	69.352	1	0.00173688	52.576	3
	KFZ67_10820	133	K	Glucose-specific phosphotransferase enzyme IIA component OS=Photobacterium damsela subsp. piscicida OX=38294 GN=BEI67_10460 PE=4 SV=1	BEI67_10460	3	-1.2435	4	AK(1)STLTPVVISNMDEIK	1	1.28845e-12	99.663	1	3.12012e-07	79.92	1	1.28845e-12	99.663	3
	KFZ67_11160	120	K	S-(hydroxymethyl)glutathione dehydrogenase OS=Photobacterium damselae OX=38293 GN=frmA PE=3 SV=1	frmA	2	-1.8535	10	ETQGK(1)GLMPDGTTR	1	0.000119643	71.781	1	0.000334127	61.409	1	0.000119643	71.781	3
	KFZ67_10820	54	K	Glucose-specific phosphotransferase enzyme IIA component OS=Photobacterium damsela subsp. piscicida OX=38294 GN=BEI67_10460 PE=4 SV=1	BEI67_10460	2	-0.45376	8	IVGDGIAIK(1)PSGNK	1	5.93982e-05	77.42	1	0.00046917	58.817	1	5.93982e-05	77.42	3
	KFZ67_13715	890	K	DNA-directed RNA polymerase subunit beta OS=Photobacterium damselae OX=38293 GN=rpoB PE=3 SV=1	rpoB	2	-0.4579	4	VTPK(1)GETQLTPEEK	1	1.01776e-13	121.24	1	5.08384e-10	103.76	1	1.01776e-13	121.24	3
	KFZ67_13715	169	K	DNA-directed RNA polymerase subunit beta OS=Photobacterium damselae OX=38293 GN=rpoB PE=3 SV=1	rpoB	2	1.4426	3	THSSGK(1)VLYNAR	1	2.37586e-27	147.62	1	8.44525e-14	126.71	1	2.37586e-27	147.62	3
	KFZ67_13715	161	K	DNA-directed RNA polymerase subunit beta OS=Photobacterium damselae OX=38293 GN=rpoB PE=3 SV=1	rpoB	2	-2.0027	4	SPGVFFDSDK(1)GK	1	8.56507e-06	88.101	1	0.000648131	67.952	1	8.56507e-06	88.101	3
	KFZ67_13715	719	K	DNA-directed RNA polymerase subunit beta OS=Photobacterium damselae OX=38293 GN=rpoB PE=3 SV=1	rpoB	2	0.49797	6	QIGVDSGVTAVAK(1)R	1	2.15288e-24	145.81	1	2.15288e-24	145.81	1	1.29777e-23	139.86	3
	KFZ67_13715	107	K	DNA-directed RNA polymerase subunit beta OS=Photobacterium damselae OX=38293 GN=rpoB PE=3 SV=1	rpoB	2	-1.1505	9	LVMYDK(1)DAPAGTVK	1	1.46291e-05	83.692	1	7.1239e-05	74.789	1	1.46291e-05	83.692	3
	KFZ67_13715	1035	K	DNA-directed RNA polymerase subunit beta OS=Photobacterium damselae OX=38293 GN=rpoB PE=3 SV=1	rpoB	2	0.33829	3	K(1)ITQGDDLAPGVLK	1	4.01879e-13	117.2	1	4.01879e-13	117.2	1	3.88479e-05	79.652	3
	KFZ67_13715	996	K	DNA-directed RNA polymerase subunit beta OS=Photobacterium damselae OX=38293 GN=rpoB PE=3 SV=1	rpoB	3	0.61609	3	EK(1)LFAQTLDDEALQNQLEQLAEQYDELK	1	4.43159e-26	99.219	1	6.73019e-19	91.767	1	4.43159e-26	99.219	3
	KFZ67_13715	909	K	DNA-directed RNA polymerase subunit beta OS=Photobacterium damselae OX=38293 GN=rpoB PE=3 SV=1	rpoB	2	-0.020995	6	AIFGEK(1)ASDVK	1	0.000355652	73.632	1	0.000583335	71.085	1	0.000355652	73.632	3
	KFZ67_13715	697	K	DNA-directed RNA polymerase subunit beta OS=Photobacterium damselae OX=38293 GN=rpoB PE=3 SV=1	rpoB	2	0.33189	3	ADK(1)PLVGTGIER	1	1.44755e-07	107.65	1	1.44755e-07	107.65	1	3.44281e-07	104.17	3
	KFZ67_13235	35	K	50S ribosomal protein L9 OS=Photobacterium damselae OX=38293 GN=rplI PE=3 SV=1	rplI	2	-0.065287	8	NFLIPQAK(1)AVMATK	1	0.000335128	58.817	1	0.000367767	57.267	1	0.000335128	58.817	3
	KFZ67_13235	8	K	50S ribosomal protein L9 OS=Photobacterium damselae OX=38293 GN=rplI PE=3 SV=1	rplI	3	0.27803	3	MQVILLDK(1)IANLGGLGDQVNVK	1	4.14619e-28	121.21	1	4.14619e-28	121.21	1	1.07631e-27	119.27	3
	KFZ67_13235	22	K	50S ribosomal protein L9 OS=Photobacterium damselae OX=38293 GN=rplI PE=3 SV=1	rplI	3	0.20975	3	IANLGGLGDQVNVK(1)AGYAR	1	3.67375e-29	131.39	1	9.15438e-17	109.1	1	3.67375e-29	131.39	3
	KFZ67_13235	112	K	50S ribosomal protein L9 OS=Photobacterium damselae OX=38293 GN=rplI PE=3 SV=1	rplI	3	-0.11392	3	DIADAVTAAGVALVK(1)SEVR	1	2.12133e-29	132.79	1	2.12133e-29	132.79	1	1.25869e-12	95.963	3
	KFZ67_13715	1057	K	DNA-directed RNA polymerase subunit beta OS=Photobacterium damselae OX=38293 GN=rpoB PE=3 SV=1	rpoB	2	0.18232	3	VYLAVK(1)R	1	3.25853e-06	114.54	1	0.00048136	103.29	1	3.25853e-06	114.54	3
	KFZ67_13235	41	K	50S ribosomal protein L9 OS=Photobacterium damselae OX=38293 GN=rplI PE=3 SV=1	rplI	2	-1.6562	6	AVMATK(1)ANVEMFEAR	1	9.50856e-47	165.64	1	6.9348e-37	154.65	1	9.50856e-47	165.64	3
	KFZ67_13205	141	K	Glucose-6-phosphate isomerase OS=Photobacterium damselae OX=38293 GN=pgi PE=3 SV=1	pgi	2	0.37615	4	IVSGEWK(1)GYTGK	1	0.00170536	57.792	1	0.00170536	57.792	1	0.00279747	51.726	3
	KFZ67_13160	299	K	Sulfite reductase [NADPH] hemoprotein beta-component OS=Photobacterium damsela subsp. piscicida OX=38294 GN=cysI PE=3 SV=1	cysI	2	-0.47429	2	TK(1)YTLDR	1	0.0404102	47.849	1	0.0404102	47.849	1	0.0404102	47.849	3
	KFZ67_13160	156	K	Sulfite reductase [NADPH] hemoprotein beta-component OS=Photobacterium damsela subsp. piscicida OX=38294 GN=cysI PE=3 SV=1	cysI	3	1.1793	4	NVLCTSNPIESK(1)LHQQAYEWAAK	1	5.26242e-06	60.133	1	5.26242e-06	60.133	1	6.69054e-05	49.076	3
	KFZ67_13160	175	K	Sulfite reductase [NADPH] hemoprotein beta-component OS=Photobacterium damsela subsp. piscicida OX=38294 GN=cysI PE=3 SV=1	cysI	2	0.50203	3	ISEHLLPK(1)TR	1	0.000759054	74.53	1	0.0123857	46.73	1	0.000759054	74.53	3
	KFZ67_13140	5	K	Peptidyl-prolyl cis-trans isomerase OS=Photobacterium damsela subsp. piscicida OX=38294 GN=BEI67_13705 PE=3 SV=1	BEI67_13705	2	-1.0324	7	MFDVK(1)LDTVETK	1	5.93203e-07	99.844	1	1.0028e-05	86.288	1	5.93203e-07	99.844	3
	KFZ67_13120	177	K	Sulfate adenylyltransferase subunit 2 OS=Photobacterium damselae OX=38293 GN=cysD PE=3 SV=1	cysD	2	-0.80529	5	TYNGQINK(1)GESIR	1	7.87231e-17	124.07	1	1.19737e-12	116.19	1	7.87231e-17	124.07	3
	KFZ67_13120	238	K	Sulfate adenylyltransferase subunit 2 OS=Photobacterium damselae OX=38293 GN=cysD PE=3 SV=1	cysD	2	-1.8278	7	MPLTDSDK(1)VEQK	1	8.62978e-06	88.021	1	0.000374447	71.888	1	8.62978e-06	88.021	3
	KFZ67_13120	82	K	Sulfate adenylyltransferase subunit 2 OS=Photobacterium damselae OX=38293 GN=cysD PE=3 SV=1	cysD	3	0.25407	5	K(1)YGFELLVHK	1	0.000633938	73.499	1	0.000633938	73.499	1	0.000633938	73.499	3
	KFZ67_13120	120	K	Sulfate adenylyltransferase subunit 2 OS=Photobacterium damselae OX=38293 GN=cysD PE=3 SV=1	cysD	3	1.5478	3	TQALK(1)QALNQYGFDAAFGGAR	1	5.69251e-27	111.93	1	5.69251e-27	111.93	1	4.02357e-21	101.17	3
	KFZ67_13120	115	K	Sulfate adenylyltransferase subunit 2 OS=Photobacterium damselae OX=38293 GN=cysD PE=3 SV=1	cysD	2	2.5314	5	HTDIMK(1)TQALK	1	2.56317e-27	154.28	1	2.56317e-27	154.28	1	2.47953e-13	125.36	3
	KFZ67_13115	105	K	Sulfate adenylyltransferase subunit 1 OS=Photobacterium damselae OX=38293 GN=cysN PE=3 SV=1	cysN	2	0.17473	2	YFSTQK(1)R	1	0.000192935	107.43	1	0.000192935	107.43	1	0.000263532	106.42	3
	KFZ67_13115	284	K	Sulfate adenylyltransferase subunit 1 OS=Photobacterium damselae OX=38293 GN=cysN PE=3 SV=1	cysN	2	0.8084	4	VLPSEK(1)ESYIER	1	9.67751e-14	125.54	1	9.67751e-14	125.54	1	1.02819e-05	85.973	3
	KFZ67_13115	278	K	Sulfate adenylyltransferase subunit 1 OS=Photobacterium damselae OX=38293 GN=cysN PE=3 SV=1	cysN	2	-0.79996	2	VK(1)VLPSEK	1	5.78584e-05	105.1	1	0.000131841	98.582	1	5.78584e-05	105.1	3
	KFZ67_13235	83	K	50S ribosomal protein L9 OS=Photobacterium damselae OX=38293 GN=rplI PE=3 SV=1	rplI	3	1.235	8	AEALNALEAVVIASK(1)AGDEGK	1	7.76309e-64	162.32	1	7.36906e-35	129.02	1	7.76309e-64	162.32	3
	KFZ67_13240	30	K	30S ribosomal protein S18 OS=Photobacterium damselae OX=38293 GN=rpsR PE=3 SV=1	rpsR	2	-0.90669	9	DVATLK(1)NYITEAGK	1	1.11413e-17	131.35	1	3.89771e-17	122.97	1	1.11413e-17	131.35	3
	KFZ67_13240	73	K	30S ribosomal protein S18 OS=Photobacterium damselae OX=38293 GN=rpsR PE=3 SV=1	rpsR	2	-1.4414	4	YLALLPYTDK(1)HQ	1	5.21987e-06	92.247	1	1.01679e-05	86.114	1	5.21987e-06	92.247	3
	KFZ67_13260	143	K	Ribonuclease R OS=Photobacterium damselae OX=38293 GN=rnr PE=3 SV=1	rnr	3	0.21821	3	GVIHGDYILAQVAGVDK(1)R	1	8.88771e-16	105	1	1.42644e-15	101.9	1	8.88771e-16	105	3
	KFZ67_13575	645	K	Acetyl-coenzyme A synthetase OS=Photobacterium damselae OX=38293 GN=acs PE=3 SV=1	acs	2	0.10552	3	LIAEK(1)QQLL	1	0.00442148	61.679	1	0.0138315	49.536	1	0.00442148	61.679	3
	KFZ67_13575	640	K	Acetyl-coenzyme A synthetase OS=Photobacterium damselae OX=38293 GN=acs PE=3 SV=1	acs	3	0.2204	4	IATGDTSNLGDTSTLADPSVVEK(1)LIAEK	1	1.38514e-13	82.942	1	3.60515e-09	65.171	1	1.38514e-13	82.942	3
	KFZ67_13575	367	K	Acetyl-coenzyme A synthetase OS=Photobacterium damselae OX=38293 GN=acs PE=3 SV=1	acs	2	0.10714	16	ALMAK(1)GDEAIVDTSR	1	6.73423e-22	123.76	1	6.73423e-22	123.76	1	1.50243e-18	116.58	3
	KFZ67_13525	306	K	Aspartate ammonia-lyase OS=Photobacterium damselae OX=38293 GN=aspA PE=3 SV=1	aspA	2	0.68474	5	LSK(1)ICNDLR	1	5.40712e-17	140.45	1	3.62306e-05	105.2	1	5.40712e-17	140.45	3
	KFZ67_13525	68	K	Aspartate ammonia-lyase OS=Photobacterium damselae OX=38293 GN=aspA PE=3 SV=1	aspA	2	0.19671	3	GMVFTK(1)K	1	0.01078	80.462	1	0.0207989	68.915	1	0.01078	80.462	3
	KFZ67_13525	153	K	Aspartate ammonia-lyase OS=Photobacterium damselae OX=38293 GN=aspA PE=3 SV=1	aspA	3	-1.316	7	GEYSIVNPNDHVNK(1)SQSTNCAYPTGFR	1	2.51074e-25	109.23	1	1.58248e-17	94.594	1	2.51074e-25	109.23	3
	KFZ67_13525	139	K	Aspartate ammonia-lyase OS=Photobacterium damselae OX=38293 GN=aspA PE=3 SV=1	aspA	2	-0.29377	4	EK(1)GEYSIVNPNDHVNK	1	1.38789e-05	62.949	1	1.38789e-05	62.949	1	0.000135072	55.755	3
	KFZ67_13525	402	K	Aspartate ammonia-lyase OS=Photobacterium damselae OX=38293 GN=aspA PE=3 SV=1	aspA	2	-2.0856	6	DK(1)CIDGITVNK	1	0.0007054	69.864	1	0.00333928	55.188	1	0.0007054	69.864	3
	KFZ67_13510	34	K	10 kDa chaperonin OS=Photobacterium damsela subsp. piscicida OX=38294 GN=groES PE=3 SV=1	groES	2	-0.96648	6	SAGGIVLTGSAAEK(1)STR	1	1.12591e-37	154.46	1	2.94926e-30	146.2	1	1.12591e-37	154.46	3
	KFZ67_13505	321	K	60 kDa chaperonin OS=Photobacterium damsela subsp. piscicida OX=38294 GN=groL PE=3 SV=1	groL	2	1.6172	6	VQLEDLGQAK(1)R	1	1.51848e-60	185.29	1	1.51848e-60	185.29	1	1.51848e-60	185.29	3
	KFZ67_10820	6	K	Glucose-specific phosphotransferase enzyme IIA component OS=Photobacterium damsela subsp. piscicida OX=38294 GN=BEI67_10460 PE=4 SV=1	BEI67_10460	2	0.65091	4	GLFDK(1)LK	1	0.00959035	83.614	1	0.0477041	50.632	1	0.00959035	83.614	3
	KFZ67_13505	371	K	60 kDa chaperonin OS=Photobacterium damsela subsp. piscicida OX=38294 GN=groL PE=3 SV=1	groL	2	0.3264	3	VAK(1)LAGGVAVIK	1	0.000346462	72.29	1	0.000346462	72.29	1	0.000346462	72.29	3
	KFZ67_13505	277	K	60 kDa chaperonin OS=Photobacterium damsela subsp. piscicida OX=38294 GN=groL PE=3 SV=1	groL	2	-0.22026	7	VAAVK(1)APGFGDR	1	6.99691e-14	128.08	1	6.99691e-14	128.08	1	9.06893e-14	126.12	3
	KFZ67_13505	51	K	60 kDa chaperonin OS=Photobacterium damsela subsp. piscicida OX=38294 GN=groL PE=3 SV=1	groL	2	0.58831	11	SFGAPTITK(1)DGVSVAR	1	1.99981e-47	169.37	1	1.99981e-47	169.37	1	3.56781e-37	155.06	3
	KFZ67_13505	456	K	60 kDa chaperonin OS=Photobacterium damsela subsp. piscicida OX=38294 GN=groL PE=3 SV=1	groL	3	0.53235	3	QITK(1)NAGDEESVVANNVK	1	6.46641e-12	92.439	1	6.31888e-07	66.809	1	6.46641e-12	92.439	3
	KFZ67_13505	34	K	60 kDa chaperonin OS=Photobacterium damsela subsp. piscicida OX=38294 GN=groL PE=3 SV=1	groL	2	0.40719	3	VTLGPK(1)GR	1	2.28918e-16	135.77	1	6.69937e-07	112.3	1	2.28918e-16	135.77	3
	KFZ67_13505	28	K	60 kDa chaperonin OS=Photobacterium damsela subsp. piscicida OX=38294 GN=groL PE=3 SV=1	groL	3	-1.2995	3	MLEGVNVLADAVK(1)VTLGPK	1	8.27917e-10	79.489	1	8.27917e-10	79.489	1	2.96352e-07	70.094	3
	KFZ67_13505	122	K	60 kDa chaperonin OS=Photobacterium damsela subsp. piscicida OX=38294 GN=groL PE=3 SV=1	groL	3	0.84066	7	GIDK(1)AVVAAVEELK	1	9.71413e-07	85.909	1	9.71413e-07	85.909	1	2.21712e-05	81.448	3
	KFZ67_13505	242	K	60 kDa chaperonin OS=Photobacterium damsela subsp. piscicida OX=38294 GN=groL PE=3 SV=1	groL	2	-0.88689	8	ELLPALEGVAK(1)ASR	1	1.49695e-17	130.2	1	9.12899e-13	111.83	1	1.49695e-17	130.2	3
	KFZ67_13505	117	K	60 kDa chaperonin OS=Photobacterium damsela subsp. piscicida OX=38294 GN=groL PE=3 SV=1	groL	2	-2.328	12	AVAAGMNPMDLK(1)R	1	9.83103e-24	144.57	1	1.17544e-12	115.57	1	9.83103e-24	144.57	3
	KFZ67_13505	168	K	60 kDa chaperonin OS=Photobacterium damsela subsp. piscicida OX=38294 GN=groL PE=3 SV=1	groL	3	2.7959	4	AIAQVGTISANSDATVGNLIAEAMDK(1)VGR	1	9.97401e-37	121.94	1	2.11558e-35	112.34	1	9.97401e-37	121.94	3
	KFZ67_13300	323	K	Protein HflK OS=Photobacterium damselae OX=38293 GN=hflK PE=3 SV=1	hflK	2	-0.77117	7	VYSNTSK(1)VLIDTK	1	4.06143e-05	83.087	1	5.61825e-05	82.069	1	4.06143e-05	83.087	3
	KFZ67_13300	300	K	Protein HflK OS=Photobacterium damselae OX=38293 GN=hflK PE=3 SV=1	hflK	2	0.6864	2	LLPEYLK(1)AK	1	0.035878	40.994	1	0.035878	40.994	1	0.035878	40.994	3
	KFZ67_13300	44	K	Protein HflK OS=Photobacterium damselae OX=38293 GN=hflK PE=3 SV=1	hflK	2	1.8021	3	K(1)VGGILGNNK	1	3.60848e-05	98.055	1	3.60848e-05	98.055	1	4.57378e-05	97.277	3
	KFZ67_13300	209	K	Protein HflK OS=Photobacterium damselae OX=38293 GN=hflK PE=3 SV=1	hflK	2	0.99466	2	IIAK(1)YNMGIR	1	0.0114746	44.318	1	0.0128726	43.308	1	0.0114746	44.318	3
	KFZ67_13300	22	K	Protein HflK OS=Photobacterium damselae OX=38293 GN=hflK PE=3 SV=1	hflK	2	-0.38784	3	DNDPWGNNNK(1)NR	1	9.82733e-10	116.55	1	1.5386e-09	113.22	1	9.82733e-10	116.55	3
	KFZ67_13295	39	K	Protein HflC OS=Photobacterium damselae OX=38293 GN=hflC PE=3 SV=1	hflC	3	1.4614	4	IIK(1)DNNTEVAQVYAPGLHFK	1	2.28606e-16	100.07	1	5.90322e-13	94.387	1	2.28606e-16	100.07	3
	KFZ67_13285	432	K	Adenylosuccinate synthetase OS=Photobacterium damsela subsp. piscicida OX=38294 GN=purA PE=3 SV=1	purA	2	-1.3236	5	NETIIK(1)VHPYGE	1	0.000191371	77.279	1	0.000499508	70.089	1	0.000191371	77.279	3
	KFZ67_13285	19	K	Adenylosuccinate synthetase OS=Photobacterium damsela subsp. piscicida OX=38294 GN=purA PE=3 SV=1	purA	2	0.42626	4	GK(1)IVDLLTEDAK	1	4.77979e-06	92.792	1	0.000636333	68.121	1	4.77979e-06	92.792	3
	KFZ67_13115	24	K	Sulfate adenylyltransferase subunit 1 OS=Photobacterium damselae OX=38293 GN=cysN PE=3 SV=1	cysN	4	-0.41155	3	MNHAIQQQVAELGIEAYLDQHQNK(1)SLLR	1	7.1067e-36	119.87	1	3.02955e-35	111.55	1	7.1067e-36	119.87	3
	KFZ67_13115	459	K	Sulfate adenylyltransferase subunit 1 OS=Photobacterium damselae OX=38293 GN=cysN PE=3 SV=1	cysN	3	-0.477	3	K(1)HFPHWNSSDISK	1	0.000240764	70.563	1	0.000278187	70.438	1	0.000240764	70.563	3
	KFZ67_13505	390	K	60 kDa chaperonin OS=Photobacterium damsela subsp. piscicida OX=38294 GN=groL PE=3 SV=1	groL	2	-2.3257	3	VGAATEVEMK(1)EK	1	0.000986079	63.091	1	0.00575326	46.069	1	0.000986079	63.091	3
	KFZ67_13105	7	K	Adenylyl-sulfate kinase OS=Photobacterium damselae OX=38293 GN=cysC PE=3 SV=1	cysC	3	-0.27079	4	TSVLVK(1)DNVIWHQHSVNK	1	2.59995e-09	73.953	1	2.42245e-07	70.802	1	2.59995e-09	73.953	3
	KFZ67_17310	167	K	Bifunctional protein PutA OS=Photobacterium damselae subsp. damselae OX=85581 GN=putA PE=3 SV=1	putA	2	-0.22561	2	LVNK(1)LSEPVVR	1	0.00233595	58.511	1	0.0124802	43.604	1	0.00233595	58.511	3
	KFZ67_17310	390	K	Bifunctional protein PutA OS=Photobacterium damselae subsp. damselae OX=85581 GN=putA PE=3 SV=1	putA	2	-1.0694	8	K(1)EATDCAYLACAR	1	1.56176e-09	100.22	1	1.56176e-09	100.22	1	1.56176e-09	100.22	3
	KFZ67_16835	10	K	Endopeptidase La OS=Photobacterium damsela subsp. piscicida OX=38294 GN=BEI67_11415 PE=3 SV=1	BEI67_11415	2	-0.35312	3	SVQPLSSDK(1)LYR	1	1.59049e-06	96.745	1	0.000212198	76.326	1	1.59049e-06	96.745	3
	KFZ67_16740	15	K	Cold shock-like protein CspG OS=Photobacterium damsela subsp. piscicida OX=38294 GN=BEI67_16300 PE=4 SV=1	BEI67_16300	3	-1.6027	3	WFNEEK(1)GFGFITQDNGGADVFVHFR	1	1.14435e-87	180.63	1	7.54758e-64	157.3	1	1.14435e-87	180.63	3
	KFZ67_16740	9	K	Cold shock-like protein CspG OS=Photobacterium damsela subsp. piscicida OX=38294 GN=BEI67_16300 PE=4 SV=1	BEI67_16300	2	0.38971	8	ATGTVK(1)WFNEEK	1	1.48954e-27	151.98	1	3.12177e-05	84.605	1	1.48954e-27	151.98	3
	KFZ67_16740	42	K	Cold shock-like protein CspG OS=Photobacterium damsela subsp. piscicida OX=38294 GN=BEI67_16300 PE=4 SV=1	BEI67_16300	2	0.76224	23	AITGEGFK(1)TLAEGQK	1	2.45463e-22	130.72	1	2.45463e-22	130.72	1	3.60582e-22	128.85	3
	KFZ67_15635	179	K	Fumarate hydratase class II OS=Photobacterium damselae OX=38293 GN=aspA PE=3 SV=1	aspA	3	-0.39316	2	AIGHIVK(1)TGR	1	0.00190143	60.167	1	0.00345384	55.806	1	0.00190143	60.167	3
	KFZ67_13730	141	K	50S ribosomal protein L1 OS=Photobacterium damsela subsp. piscicida OX=38294 GN=rplA PE=3 SV=1	rplA	3	1.5122	5	GLMPNPK(1)VGTVTPNVAEAVK	1	2.82082e-07	70.094	1	9.60481e-07	61.276	1	2.82082e-07	70.094	3
	KFZ67_13730	31	K	50S ribosomal protein L1 OS=Photobacterium damsela subsp. piscicida OX=38294 GN=rplA PE=3 SV=1	rplA	3	-0.081777	3	EYDINEAVALLK(1)ELATAK	1	3.98979e-16	107.62	1	1.49979e-10	84.94	1	3.98979e-16	107.62	3
	KFZ67_13730	205	K	50S ribosomal protein L1 OS=Photobacterium damsela subsp. piscicida OX=38294 GN=rplA PE=3 SV=1	rplA	2	-0.74901	5	PSSAK(1)GTFIK	1	0.00191232	57.225	1	0.00407613	57.225	1	0.00191232	56.139	3
	KFZ67_15425	191	K	Glutathione-dependent disulfide-bond oxidoreductase OS=Photobacterium damselae OX=38293 GN=yghU_1 PE=4 SV=1	yghU_1	2	1.9761	3	QLDVLDK(1)QLAK	1	8.95492e-06	93.345	1	0.000134246	81.525	1	8.95492e-06	93.345	3
	KFZ67_15315	64	K	DNA-binding response regulator OS=Photobacterium damselae subsp. damselae OX=85581 GN=qseB PE=4 SV=1	qseB	2	0.087194	3	LDGITVLK(1)GIR	1	4.3464e-06	96.229	1	4.3464e-06	96.229	1	1.15818e-05	91.701	3
	KFZ67_15090	26	K	Aspartoacylase OS=Photobacterium damselae subsp. damselae OX=85581 GN=EQ875_01098 PE=3 SV=1	EQ875_01098	2	2.1322	2	K(1)WQQQPQSISR	1	1.68e-05	87.184	1	0.000643171	69.721	1	1.68e-05	87.184	3
	KFZ67_17840	66	K	Probable transcriptional regulatory protein BEI67_11555 OS=Photobacterium damsela subsp. piscicida OX=38294 GN=BEI67_11555 PE=3 SV=1	BEI67_11555	2	1.5479	3	DQVPSHVIEK(1)AIDK	1	2.22086e-07	95.662	1	1.94291e-06	85.469	1	2.22086e-07	95.662	3
	KFZ67_15040	105	K	Chaperone protein DnaK OS=Photobacterium damselae subsp. damselae OX=85581 GN=dnaK_2 PE=2 SV=1	dnaK_2	2	0.70976	6	ADNGDAWVEAK(1)GQK	1	7.2327e-08	97.203	1	2.98215e-07	95.195	1	7.2327e-08	97.203	3
	KFZ67_14070	140	K	ATP synthase subunit alpha OS=Photobacterium damselae OX=38293 GN=atpA PE=3 SV=1	atpA	2	-0.63152	6	K(1)SVDQPVQTGYK	1	2.25033e-37	168.31	1	9.70204e-20	137.84	1	2.25033e-37	168.31	3
	KFZ67_14060	238	K	ATP synthase subunit beta OS=Photobacterium damselae OX=38293 GN=atpD PE=3 SV=1	atpD	2	1.6882	3	VALTGLTMAEK(1)FR	1	1.04674e-40	161.48	1	1.04674e-40	161.48	1	1.04674e-40	161.48	3
	KFZ67_14060	430	K	ATP synthase subunit beta OS=Photobacterium damselae OX=38293 GN=atpD PE=3 SV=1	atpD	3	0.59885	2	FLTQPYHVAEVFTGQPGIYVPLK(1)DTLR	1	5.68803e-08	66.36	1	1.78516e-06	59.372	1	5.68803e-08	66.36	3
	KFZ67_14055	95	K	ATP synthase epsilon chain OS=Photobacterium damselae OX=38293 GN=atpC PE=3 SV=1	atpC	2	0.71807	2	GVDLDAAK(1)AEEAK	1	0.00101591	70.889	1	0.00101591	70.889	1	0.00182548	59.75	3
	KFZ67_14050	216	K	Bifunctional protein GlmU OS=Photobacterium damselae OX=38293 GN=glmU PE=3 SV=1	glmU	3	0.75976	3	AVEAVHPEK(1)AIEVEGVNNR	1	2.22921e-21	111.63	1	2.95611e-10	83.423	1	2.22921e-21	111.63	3
	KFZ67_13735	51	K	50S ribosomal protein L11 OS=Photobacterium damsela subsp. piscicida OX=38294 GN=rplK PE=3 SV=1	rplK	3	1.9126	2	TDSLEK(1)GLPTPVVITVYSDR	1	3.11698e-45	154.55	1	3.11698e-45	154.55	1	1.27442e-36	139.11	3
	KFZ67_13735	81	K	50S ribosomal protein L11 OS=Photobacterium damsela subsp. piscicida OX=38294 GN=rplK PE=3 SV=1	rplK	2	0.93443	5	TPPAAVLLK(1)K	1	0.00102007	70.441	1	0.00102007	70.441	1	0.00350798	57.532	3
	KFZ67_13735	72	K	50S ribosomal protein L11 OS=Photobacterium damsela subsp. piscicida OX=38294 GN=rplK PE=3 SV=1	rplK	3	-0.058874	2	SFTFITK(1)TPPAAVLLK	1	8.66675e-05	56.46	1	0.00152122	40.211	1	8.66675e-05	56.46	3
	KFZ67_13735	97	K	50S ribosomal protein L11 OS=Photobacterium damsela subsp. piscicida OX=38294 GN=rplK PE=3 SV=1	rplK	3	-0.63291	7	SGSGRPNTEK(1)VGTVTEAQIQEIAETK	1	6.67228e-64	163.62	1	6.67228e-64	163.62	1	9.44346e-54	154.6	3
	KFZ67_13735	126	K	50S ribosomal protein L11 OS=Photobacterium damsela subsp. piscicida OX=38294 GN=rplK PE=3 SV=1	rplK	2	-0.63035	7	AADMTGADIEAMK(1)R	1	1.52907e-10	107.99	1	5.08156e-05	78.814	1	1.52907e-10	107.99	3
	KFZ67_12895	45	K	Arginine repressor OS=Photobacterium damselae OX=38293 GN=argR_1 PE=3 SV=1	argR_1	2	-0.35564	7	AQGFDNINQSK(1)VSR	1	2.65649e-17	126.71	1	2.65649e-17	126.71	1	2.89894e-17	125.97	3
	KFZ67_12870	44	K	50S ribosomal protein L27 OS=Photobacterium damsela subsp. piscicida OX=38294 GN=rpmA PE=3 SV=1	rpmA	2	0.33269	3	GTK(1)FHAGTNVGLGK	1	1.73112e-31	151.41	1	1.73112e-31	151.41	1	8.85415e-14	121.39	3
	KFZ67_13115	362	K	Sulfate adenylyltransferase subunit 1 OS=Photobacterium damselae OX=38293 GN=cysN PE=3 SV=1	cysN	3	1.2031	5	IAGNK(1)TQGQVIGFEHQIDINK	1	5.92562e-11	82.635	1	6.81326e-07	64.522	1	5.92562e-11	82.635	3
	KFZ67_14070	426	K	ATP synthase subunit alpha OS=Photobacterium damselae OX=38293 GN=atpA PE=3 SV=1	atpA	3	-1.2321	3	QLDHGQK(1)VTELMK	1	0.000182911	71.806	1	0.000182911	71.806	1	0.000361579	66.023	3
	KFZ67_17840	116	K	Probable transcriptional regulatory protein BEI67_11555 OS=Photobacterium damsela subsp. piscicida OX=38294 GN=BEI67_11555 PE=3 SV=1	BEI67_11555	2	1.1833	3	QCFVK(1)NNAK	1	0.00253685	71.221	1	0.0116907	63.624	1	0.00253685	71.221	3
	KFZ67_13730	167	K	50S ribosomal protein L1 OS=Photobacterium damsela subsp. piscicida OX=38294 GN=rplA PE=3 SV=1	rplA	2	3.6681	3	NDK(1)NGIIHTTIGK	1	0.00562512	64.104	1	0.0223597	47.774	1	0.00562512	64.104	3
	KFZ67_17960	243	K	Transketolase OS=Photobacterium damselae OX=38293 GN=tkt PE=3 SV=1	tkt	3	-0.54468	4	ADTTRPTLICCK(1)TIIGFGSPNK	1	1.47338e-10	67.895	1	1.47338e-10	65.833	1	4.51088e-07	67.895	3
	KFZ67_12925	113	K	Inorganic pyrophosphatase OS=Photobacterium damselae OX=38293 GN=ppa PE=3 SV=1	ppa	3	-2.1677	2	VIAVPHHK(1)VSK	1	0.00539494	47.154	1	0.00698296	45.603	1	0.00539494	47.154	3
	KFZ67_12920	33	K	Fructose-1,6-bisphosphatase class 1 OS=Photobacterium damsela subsp. piscicida OX=38294 GN=fbp PE=3 SV=1	fbp	3	-2.1513	2	QNDFPHASGELSSLLGSIK(1)LAAK	1	5.65823e-07	61.963	1	5.65823e-07	61.963	1	2.83731e-05	55.988	3
	KFZ67_12920	325	K	Fructose-1,6-bisphosphatase class 1 OS=Photobacterium damsela subsp. piscicida OX=38294 GN=fbp PE=3 SV=1	fbp	2	-1.9314	5	NMVK(1)QVEDYLER	1	4.27257e-07	102.73	1	8.51511e-06	88.163	1	4.27257e-07	102.73	3
	KFZ67_12920	223	K	Fructose-1,6-bisphosphatase class 1 OS=Photobacterium damsela subsp. piscicida OX=38294 GN=fbp PE=3 SV=1	fbp	2	-0.01092	3	FPQGIK(1)QYIK	1	1.92789e-05	104.39	1	9.56732e-05	94.804	1	1.92789e-05	104.39	3
	KFZ67_13710	654	K	DNA-directed RNA polymerase subunit beta' OS=Photobacterium damselae OX=38293 GN=rpoC PE=3 SV=1	rpoC	3	4.4821	2	YTK(1)IAEAEAEVAEIQEQFQSGLVTAGER	1	3.36255e-46	123.35	1	1.47079e-35	117.03	1	3.36255e-46	123.35	3
	KFZ67_13710	345	K	DNA-directed RNA polymerase subunit beta' OS=Photobacterium damselae OX=38293 GN=rpoC PE=3 SV=1	rpoC	2	-0.43362	3	QNLLGK(1)R	1	2.60716e-06	116.11	1	0.0065337	86.866	1	2.60716e-06	116.11	3
	KFZ67_17875	40	K	Transcriptional regulator OS=Photobacterium damselae subsp. damselae CIP 102761 OX=675817 GN=VDA_001048 PE=4 SV=1	VDA_001048	2	-1.7294	4	ISAAAEVSK(1)R	1	0.000186915	88.495	1	0.000571062	77.192	1	0.000186915	88.495	3
	KFZ67_13710	604	K	DNA-directed RNA polymerase subunit beta' OS=Photobacterium damselae OX=38293 GN=rpoC PE=3 SV=1	rpoC	2	-1.2321	3	QISK(1)LLNTCYR	1	1.83832e-19	140.82	1	1.83832e-19	140.82	1	1.7202e-07	108.97	3
	KFZ67_12870	66	K	50S ribosomal protein L27 OS=Photobacterium damsela subsp. piscicida OX=38294 GN=rpmA PE=3 SV=1	rpmA	3	-1.2026	7	DHTLFALSDGK(1)VK	1	9.60961e-41	162.31	1	4.10269e-23	137.95	1	9.60961e-41	162.31	3
	KFZ67_13710	965	K	DNA-directed RNA polymerase subunit beta' OS=Photobacterium damselae OX=38293 GN=rpoC PE=3 SV=1	rpoC	2	0.98246	7	LQNAK(1)FVINGEGK	1	1.40275e-12	115.12	1	1.40275e-12	115.12	1	1.692e-12	113.61	3
	KFZ67_13710	1247	K	DNA-directed RNA polymerase subunit beta' OS=Photobacterium damselae OX=38293 GN=rpoC PE=3 SV=1	rpoC	2	1.5428	3	LQGVK(1)INDK	1	0.000583739	87.149	1	0.0129688	41.399	1	0.000583739	87.149	3
	KFZ67_13710	1133	K	DNA-directed RNA polymerase subunit beta' OS=Photobacterium damselae OX=38293 GN=rpoC PE=3 SV=1	rpoC	2	-0.77627	6	IPQASGGTK(1)DITGGLPR	1	6.82962e-18	116.06	1	6.82962e-18	116.06	1	1.20286e-17	111.22	3
	KFZ67_13710	1251	K	DNA-directed RNA polymerase subunit beta' OS=Photobacterium damselae OX=38293 GN=rpoC PE=3 SV=1	rpoC	3	0.16101	5	INDK(1)HIETIIR	1	6.34789e-05	83.182	1	0.000261266	73.435	1	6.34789e-05	83.182	3
	KFZ67_13710	87	K	DNA-directed RNA polymerase subunit beta' OS=Photobacterium damselae OX=38293 GN=rpoC PE=3 SV=1	rpoC	2	2.0853	4	GVICEK(1)CGVEVTQTK	1	2.60989e-12	107.74	1	9.7845e-07	83.633	1	2.60989e-12	107.74	3
	KFZ67_13710	395	K	DNA-directed RNA polymerase subunit beta' OS=Photobacterium damselae OX=38293 GN=rpoC PE=3 SV=1	rpoC	2	-0.42536	3	GLATTIK(1)AAK	1	0.00011613	93.667	1	0.000273772	85.29	1	0.00011613	93.667	3
	KFZ67_13710	1206	K	DNA-directed RNA polymerase subunit beta' OS=Photobacterium damselae OX=38293 GN=rpoC PE=3 SV=1	rpoC	3	0.32869	3	VEK(1)GDVIADGPESPHDILR	1	1.08962e-09	77.554	1	1.08962e-09	77.554	1	1.2839e-09	76.118	3
	KFZ67_13725	141	K	50S ribosomal protein L10 OS=Photobacterium damselae OX=38293 GN=rplJ PE=3 SV=1	rplJ	2	-1.5484	4	LMMCMK(1)EASAGK	1	0.000678209	67.519	1	0.00166059	58.04	1	0.000678209	67.519	3
	KFZ67_13710	74	K	DNA-directed RNA polymerase subunit beta' OS=Photobacterium damselae OX=38293 GN=rpoC PE=3 SV=1	rpoC	2	-0.20361	6	DYECLCGK(1)YK	1	0.000209155	88.495	1	0.000237891	86.898	1	0.000209155	88.495	3
	KFZ67_17965	269	K	Transaldolase OS=Photobacterium damselae OX=38293 GN=tal PE=3 SV=1	tal	2	-0.17267	3	LLPATEVK(1)AR	1	1.09638e-08	121.73	1	4.03992e-05	98.048	1	1.09638e-08	121.73	3
	KFZ67_17965	4	K	Transaldolase OS=Photobacterium damselae OX=38293 GN=tal PE=3 SV=1	tal	2	-1.0554	3	STK(1)LEQLR	1	0.000936256	89.698	1	0.00610738	72.23	1	0.000936256	89.698	3
	KFZ67_18295	75	K	NADH-dependent alcohol dehydrogenase OS=Photobacterium damselae subsp. damselae OX=85581 GN=CAY62_19195 PE=4 SV=1	CAY62_19195	2	-0.79724	2	ETLDK(1)AVAIVK	1	0.0120667	43.897	1	0.0120667	43.897	1	0.0158443	41.227	3
	KFZ67_18295	41	K	NADH-dependent alcohol dehydrogenase OS=Photobacterium damselae subsp. damselae OX=85581 GN=CAY62_19195 PE=4 SV=1	CAY62_19195	2	0.37383	3	VLVIYGGGSIK(1)K	1	0.000446395	70.089	1	0.000446395	70.089	1	0.000446395	70.089	3
	KFZ67_16420	135	K	Molybdopterin adenylyltransferase OS=Photobacterium damsela subsp. piscicida OX=38294 GN=BEI67_15870 PE=4 SV=1	BEI67_15870	2	-0.83611	3	GDSLIVNLPGK(1)PK	1	0.000709634	61.11	1	0.000979065	58.04	1	0.000709634	61.11	3
	KFZ67_17975	27	K	Purine nucleoside phosphorylase DeoD-type OS=Photobacterium damselae OX=38293 GN=deoD PE=3 SV=1	deoD	2	0.36151	3	AK(1)FIAETYLEDAK	1	0.000265352	71.513	1	0.000696865	61.409	1	0.000265352	71.513	3
	KFZ67_12875	10	K	50S ribosomal protein L21 OS=Photobacterium damselae OX=38293 GN=rplU PE=3 SV=1	rplU	3	-0.94316	4	MYAVFQSGGK(1)QHR	1	1.17388e-09	100.93	1	1.17388e-09	100.93	1	1.17388e-09	100.93	3
	KFZ67_13725	8	K	50S ribosomal protein L10 OS=Photobacterium damselae OX=38293 GN=rplJ PE=3 SV=1	rplJ	2	0.64829	5	ALNLQDK(1)K	1	0.000276043	96.113	1	0.000433724	94.309	1	0.000276043	96.113	3
	KFZ67_13725	9	K	50S ribosomal protein L10 OS=Photobacterium damselae OX=38293 GN=rplJ PE=3 SV=1	rplJ	3	0.49864	3	K(1)AIVAEVNEAANGALSAVVADSR	1	9.61962e-55	157.7	1	6.12194e-45	143.91	1	9.61962e-55	157.7	3
	KFZ67_13725	147	K	50S ribosomal protein L10 OS=Photobacterium damselae OX=38293 GN=rplJ PE=3 SV=1	rplJ	2	0.84855	6	EASAGK(1)LVR	1	1.53009e-07	118.33	1	1.53009e-07	118.33	1	2.51706e-07	115.7	3
	KFZ67_17965	315	K	Transaldolase OS=Photobacterium damselae OX=38293 GN=tal PE=3 SV=1	tal	2	-0.22748	2	LETMIAEK(1)L	1	0.0237298	44.349	1	0.0237298	44.349	1	0.0309347	41.448	3
Cytoplasmic Membrane	KFZ67_04375	103	K	Peptidylprolyl isomerase OS=Photobacterium damselae OX=38293 GN=BST98_04400 PE=4 SV=1	BST98_04400	2	0.72443	5	MINDVLIQK(1)R	1	4.1242e-08	119.53	1	3.21615e-07	115.78	1	4.1242e-08	119.53	3
	KFZ67_01790	236	K	Cytochrome b OS=Photobacterium damselae OX=38293 GN=petB PE=3 SV=1	petB	2	-0.50798	2	GEGYSPQFK(1)FHK	1	0.00163686	58.172	1	0.00320756	49.448	1	0.00163686	58.172	3
	KFZ67_09970	267	K	Succinate dehydrogenase flavoprotein subunit OS=Photobacterium damselae OX=38293 GN=sdhA PE=3 SV=1	sdhA	2	-0.44072	3	GEGGYLLNK(1)DGER	1	0.00126184	54.898	1	0.00177311	49.216	1	0.00126184	54.898	3
	KFZ67_09970	320	K	Succinate dehydrogenase flavoprotein subunit OS=Photobacterium damselae OX=38293 GN=sdhA PE=3 SV=1	sdhA	2	1.5562	3	LDHLGK(1)EVLESR	1	6.18548e-05	83.204	1	6.18548e-05	83.204	1	0.00015781	78.814	3
	KFZ67_09970	124	K	Succinate dehydrogenase flavoprotein subunit OS=Photobacterium damselae OX=38293 GN=sdhA PE=3 SV=1	sdhA	2	0.056288	3	PFGGQSK(1)EFGGEQAAR	1	2.13975e-08	90.348	1	8.05754e-06	70.197	1	2.13975e-08	90.348	3
	KFZ67_09970	281	K	Succinate dehydrogenase flavoprotein subunit OS=Photobacterium damselae OX=38293 GN=sdhA PE=3 SV=1	sdhA	2	-1.3261	3	YAPNAK(1)DLAGR	1	0.00210855	59.265	1	0.00210855	59.265	1	0.00361625	54.27	3
	KFZ67_01765	106	K	Inner membrane protein YhcB OS=Photobacterium damselae subsp. damselae OX=85581 GN=yhcB PE=4 SV=1	yhcB	3	-0.33235	3	ISNLTAVK(1)AEHSDDETQDQPR	1	2.19772e-27	118.37	1	2.19772e-27	118.37	1	2.14748e-22	109.65	3
	KFZ67_04375	561	K	Peptidylprolyl isomerase OS=Photobacterium damselae OX=38293 GN=BST98_04400 PE=4 SV=1	BST98_04400	2	-0.96471	2	PQAGK(1)ATYGVTR	1	4.375e-14	130.56	1	4.375e-14	130.56	1	1.7781e-09	111.79	3
	KFZ67_06650	198	K	PTS fructose transporter subunit EIIBC OS=Photobacterium damselae OX=38293 GN=BST98_06705 PE=4 SV=1	BST98_06705	2	1.1141	3	LYK(1)TSTGAALK	1	0.000153618	80.834	1	0.00210855	59.265	1	0.000153618	80.834	3
	KFZ67_01785	44	K	Ubiquinol-cytochrome c reductase iron-sulfur subunit OS=Photobacterium damselae OX=38293 GN=petA PE=4 SV=1	petA	2	1.7385	3	AK(1)AAGAPVEVDISK	1	1.04449e-06	88.561	1	1.04449e-06	88.561	1	7.44177e-05	75.316	3
	KFZ67_06100	321	K	Toluene efflux pump periplasmic linker protein TtgD OS=Photobacterium damselae subsp. damselae OX=85581 GN=ttgD PE=3 SV=1	ttgD	2	1.332	2	VVVTDK(1)VVPQGVR	1	0.000788591	60.157	1	0.000788591	60.157	1	0.00154727	51.726	3
	KFZ67_06650	234	K	PTS fructose transporter subunit EIIBC OS=Photobacterium damselae OX=38293 GN=BST98_06705 PE=4 SV=1	BST98_06705	3	0.47827	3	AFATATTYQQDAANSTAETK(1)EEK	1	2.42402e-07	68.42	1	0.000329538	43.841	1	2.42402e-07	68.42	3
	KFZ67_06650	76	K	PTS fructose transporter subunit EIIBC OS=Photobacterium damselae OX=38293 GN=BST98_06705 PE=4 SV=1	BST98_06705	3	-0.295	3	K(1)VYVADIADCFENTK	1	7.39663e-06	71.935	1	7.39663e-06	71.935	1	2.85398e-05	61.649	3
	KFZ67_07570	177	K	4Fe-4S dicluster domain-containing protein OS=Photobacterium damselae OX=38293 GN=fdhB1 PE=4 SV=1	fdhB1	2	0.70839	3	ISEIYSK(1)R	1	1.54022e-32	161.02	1	7.85249e-08	121.09	1	1.54022e-32	161.02	3
	KFZ67_08060	65	K	Chaperone protein TorD OS=Photobacterium damselae subsp. damselae OX=85581 GN=torD_2 PE=3 SV=1	torD_2	2	0.18129	4	AALTK(1)LETR	1	5.93241e-05	102.01	1	5.93241e-05	102.01	1	0.00123372	80.755	3
	KFZ67_05195	11	K	EIICB-Glc OS=Photobacterium damselae OX=38293 GN=ptsG_4 PE=4 SV=1	ptsG_4	2	0.56095	3	NLFASLQK(1)VGK	1	0.000838164	68.536	1	0.000838164	68.536	1	0.00180959	60.255	3
	KFZ67_08840	164	K	Cytochrome c-type protein OS=Photobacterium damselae OX=38293 GN=torC PE=3 SV=1	torC	2	0.5929	3	AQVQMK(1)QAAAR	1	2.89482e-13	123.79	1	4.3238e-09	112.13	1	2.89482e-13	123.79	3
	KFZ67_05195	433	K	EIICB-Glc OS=Photobacterium damselae OX=38293 GN=ptsG_4 PE=4 SV=1	ptsG_4	2	-1.0016	4	VSVADVNK(1)VDQDR	1	1.66454e-12	113.76	1	1.27227e-06	92.636	1	1.66454e-12	113.76	3
	KFZ67_04375	288	K	Peptidylprolyl isomerase OS=Photobacterium damselae OX=38293 GN=BST98_04400 PE=4 SV=1	BST98_04400	3	-0.7201	3	QVSHILITGDSAASK(1)EK	1	1.30086e-06	71.601	1	0.000107619	49.425	1	1.30086e-06	71.601	3
	KFZ67_02490	31	K	GTPase Era OS=Photobacterium damselae OX=38293 GN=era PE=3 SV=1	era	2	-0.081882	3	LVGQK(1)LSITSR	1	0.000257698	77.124	1	0.0030322	56.205	1	0.000257698	77.124	3
	KFZ67_00175	249	K	Efflux pump membrane transporter BepE OS=Photobacterium damselae OX=38293 GN=bepE_2 PE=3 SV=1	bepE_2	2	0.33288	3	LVVSTQK(1)GQVIR	1	3.43618e-37	167.12	1	7.06669e-14	128.01	1	3.43618e-37	167.12	3
	KFZ67_13470	591	K	Fumarate reductase flavoprotein subunit OS=Photobacterium damselae OX=38293 GN=CTM90_17535 PE=3 SV=1	CTM90_17535	3	0.13956	2	LYGAAAEEAAAK(1)EAAEQQEK	1	3.54712e-10	78.78	1	3.41824e-07	69.422	1	3.54712e-10	78.78	3
	KFZ67_10050	476	K	PTS glucose transporter subunit IIBC OS=Photobacterium damselae OX=38293 GN=BST98_09995 PE=4 SV=1	BST98_09995	2	-0.5651	2	K(1)VSPAEDLSSVK	1	0.00276356	50.088	1	0.00704584	43.761	1	0.00276356	50.088	3
	KFZ67_11125	3	K	Nitrogen regulatory protein P-II OS=Photobacterium damselae OX=38293 GN=glnB_1 PE=3 SV=1	glnB_1	3	0.71278	3	K(1)IEAIIKPFK	1	0.000147248	91.549	1	0.00020724	88.056	1	0.000147248	91.549	3
	KFZ67_11970	81	K	Protein-export membrane protein SecG OS=Photobacterium damselae OX=38293 GN=CTM90_11360 PE=3 SV=1	CTM90_11360	3	0.88922	2	HTEEK(1)NSWENLSAPATTQQVQEK	1	4.04384e-18	90.308	1	7.94627e-11	69.98	1	4.04384e-18	90.308	3
	KFZ67_11985	338	K	ATP-dependent zinc metalloprotease FtsH OS=Photobacterium damselae subsp. damselae OX=85581 GN=ftsH PE=3 SV=1	ftsH	2	1.7098	3	K(1)VPLDNDVNPSLIAR	1	5.21629e-22	125.22	1	5.54449e-22	124.62	1	5.21629e-22	125.22	3
	KFZ67_13165	348	K	Sulfite reductase [NADPH] flavoprotein alpha-component OS=Photobacterium damselae OX=38293 GN=BST98_13075 PE=4 SV=1	BST98_13075	2	0.77533	3	YAELSQSK(1)R	1	5.8417e-06	109.29	1	0.000444	89.029	1	5.8417e-06	109.29	3
	KFZ67_10225	173	K	HlyD family secretion protein OS=Photobacterium damselae OX=38293 GN=BST98_10160 PE=4 SV=1	BST98_10160	2	1.1384	6	ANMSQLIK(1)SQGAK	1	8.36545e-18	132.99	1	1.3471e-09	98.501	1	8.36545e-18	132.99	3
	KFZ67_10225	317	K	HlyD family secretion protein OS=Photobacterium damselae OX=38293 GN=BST98_10160 PE=4 SV=1	BST98_10160	3	0.095383	3	FPVLIELNNEQENK(1)AHPLR	1	2.07126e-80	193.77	1	1.64163e-44	152.94	1	2.07126e-80	193.77	3
	KFZ67_10225	187	K	HlyD family secretion protein OS=Photobacterium damselae OX=38293 GN=BST98_10160 PE=4 SV=1	BST98_10160	3	0.71487	3	K(1)AAAALSQASLSLSYTNIFADHDGK	1	1.24456e-33	121.38	1	8.26262e-33	115.5	1	1.24456e-33	121.38	3
	KFZ67_10225	140	K	HlyD family secretion protein OS=Photobacterium damselae OX=38293 GN=BST98_10160 PE=4 SV=1	BST98_10160	2	1.4984	5	K(1)LYPQQELDDAK	1	7.92935e-06	87.719	1	0.000676091	66.393	1	7.92935e-06	87.719	3
	KFZ67_12515	255	K	C4-dicarboxylate ABC transporter OS=Photobacterium damselae OX=38293 GN=BST98_12475 PE=4 SV=1	BST98_12475	2	-0.48864	2	SIVFDK(1)YEENK	1	0.00117374	65.179	1	0.0030322	56.205	1	0.00117374	65.179	3
	KFZ67_14080	58	K	ATP synthase subunit b OS=Photobacterium damsela subsp. piscicida OX=38294 GN=atpF PE=3 SV=1	atpF	2	-2.5252	3	DLDLAK(1)ANASDQLK	1	7.12217e-05	75.764	1	7.12217e-05	75.764	1	0.00019691	68.044	3
	KFZ67_15535	53	K	DUF368 domain-containing protein OS=Photobacterium damselae OX=38293 GN=CTN07_14685 PE=4 SV=1	CTN07_14685	2	2.108	3	LISVLK(1)EK	1	0.0150135	58.433	1	0.0150135	58.433	1	0.0238467	52.255	3
	KFZ67_15870	408	K	3-oxoacyl-[acyl-carrier-protein] synthase 2 OS=Photobacterium damselae OX=38293 GN=fabF_2 PE=3 SV=1	fabF_2	3	-0.0035625	2	AILGAEGVK(1)QTYVQSHGTGTPQNR	1	2.30596e-07	67.11	1	2.30596e-07	67.11	1	2.30596e-07	67.11	3
	KFZ67_15885	342	K	Pyruvate oxidase OS=Photobacterium damselae OX=38293 GN=BST98_18400 PE=3 SV=1	BST98_18400	3	-0.15225	3	K(1)ELDNLAEVKPK	1	9.02509e-05	81.709	0.999996	0.00157555	58.098	1	9.02509e-05	81.709	3
	KFZ67_15885	225	K	Pyruvate oxidase OS=Photobacterium damselae OX=38293 GN=BST98_18400 PE=3 SV=1	BST98_18400	3	0.54338	3	LK(1)APIVHALR	1	0.000190122	85.533	1	0.00290527	57.347	1	0.000190122	85.533	3
	KFZ67_15885	17	K	Pyruvate oxidase OS=Photobacterium damselae OX=38293 GN=BST98_18400 PE=3 SV=1	BST98_18400	2	0.90836	3	LLSEAGVK(1)R	1	2.00483e-11	128.36	1	0.000255238	93.598	1	2.00483e-11	128.36	3
	KFZ67_15885	211	K	Pyruvate oxidase OS=Photobacterium damselae OX=38293 GN=BST98_18400 PE=3 SV=1	BST98_18400	3	0.079901	3	TVLFCGAGTK(1)NSHK	1	3.76502e-11	85.45	1	0.00274209	59.709	1	3.76502e-11	85.45	3
	KFZ67_13470	258	K	Fumarate reductase flavoprotein subunit OS=Photobacterium damselae OX=38293 GN=CTM90_17535 PE=3 SV=1	CTM90_17535	2	-1.6945	6	GEGGIIVNK(1)NGYR	1	2.09353e-12	111.52	1	0.00033581	72.29	1	2.09353e-12	111.52	3
	KFZ67_13530	208	K	Anaerobic C4-dicarboxylate transporter OS=Photobacterium damselae OX=38293 GN=dcuA PE=3 SV=1	dcuA	2	-0.85134	4	LAK(1)GLISLENK	1	1.33095e-06	100.93	1	1.33095e-06	100.93	1	2.41381e-06	97.439	3
OuterMembrane	KFZ67_04095	110	K	Outer membrane protein II OS=Photobacterium damselae OX=38293 GN=ompA_1 PE=3 SV=1	ompA_1	3	-0.031003	3	LDVFGK(1)LGTFYYDWHAK	1	5.0088e-06	61.821	1	4.21085e-05	56.817	1	5.0088e-06	61.821	3
	KFZ67_03860	285	K	OmpA family protein OS=Photobacterium damselae OX=38293 GN=CTM90_18915 PE=3 SV=1	CTM90_18915	2	1.0494	5	AINEK(1)VSNAR	1	6.82737e-25	151.83	1	6.82737e-25	151.83	1	1.33687e-17	142	3
	KFZ67_03860	280	K	OmpA family protein OS=Photobacterium damselae OX=38293 GN=CTM90_18915 PE=3 SV=1	CTM90_18915	2	0.65085	5	TDSVGSK(1)AINEK	1	2.77757e-06	95.273	1	1.0028e-05	86.288	1	2.77757e-06	95.273	3
	KFZ67_03500	74	K	LPS-assembly lipoprotein LptE OS=Photobacterium damselae OX=38293 GN=lptE PE=3 SV=1	lptE	3	2.427	2	MHGIQQVTPAK(1)NVPNLNIVSESDGDR	1	1.44431e-05	54.521	1	1.44431e-05	54.521	1	0.000195776	43.241	3
	KFZ67_03445	167	K	Outer membrane protein assembly factor BamC OS=Photobacterium damselae subsp. damselae OX=85581 GN=bamC PE=3 SV=1	bamC	2	2.1384	3	VK(1)LAAMQQDGK	1	0.00156832	61.233	1	0.00331705	55.261	1	0.00156832	61.233	3
	KFZ67_00045	99	K	Inner membrane lipoprotein YiaD OS=Photobacterium damselae OX=38293 GN=yiaD_2 PE=4 SV=1	yiaD_2	2	1.2071	2	K(1)QLASSGITVTR	1	9.11583e-28	154.28	1	1.79812e-27	149.41	1	9.11583e-28	154.28	3
	KFZ67_07930	494	K	TonB-dependent hemoglobin/transferrin/lactoferrin family receptor OS=Photobacterium damselae OX=38293 GN=CTM90_14675 PE=3 SV=1	CTM90_14675	4	0.18381	5	APTIHELYYDK(1)ENLAHGYK	1	8.42516e-10	79.514	1	8.42516e-10	79.514	1	7.71072e-07	65.175	3
	KFZ67_07930	230	K	TonB-dependent hemoglobin/transferrin/lactoferrin family receptor OS=Photobacterium damselae OX=38293 GN=CTM90_14675 PE=3 SV=1	CTM90_14675	3	0.033695	8	K(1)AANPFDIASHNVLAK	1	2.51186e-07	84.497	1	6.57285e-07	82.59	1	2.51186e-07	84.497	3
	KFZ67_07930	397	K	TonB-dependent hemoglobin/transferrin/lactoferrin family receptor OS=Photobacterium damselae OX=38293 GN=CTM90_14675 PE=3 SV=1	CTM90_14675	3	2.2303	6	HEITYGVSGTNNTFDITYTDYNLDK(1)GTSK	1	1.3247e-46	128.89	1	2.77114e-46	122.53	1	1.3247e-46	128.89	3
	KFZ67_07930	338	K	TonB-dependent hemoglobin/transferrin/lactoferrin family receptor OS=Photobacterium damselae OX=38293 GN=CTM90_14675 PE=3 SV=1	CTM90_14675	2	0.425	3	HNSYDK(1)TNYYGNR	1	6.20663e-17	126.32	1	0.000311286	70.438	1	6.20663e-17	126.32	3
	KFZ67_07930	364	K	TonB-dependent hemoglobin/transferrin/lactoferrin family receptor OS=Photobacterium damselae OX=38293 GN=CTM90_14675 PE=3 SV=1	CTM90_14675	2	0.13487	3	K(1)ELELANNR	1	4.92962e-25	157.96	1	4.92962e-25	157.96	1	3.53644e-24	149.72	3
	KFZ67_07930	73	K	TonB-dependent hemoglobin/transferrin/lactoferrin family receptor OS=Photobacterium damselae OX=38293 GN=CTM90_14675 PE=3 SV=1	CTM90_14675	2	-1.1871	4	QALK(1)YEPGVTVNGR	1	6.41171e-05	76.759	1	6.41171e-05	76.759	1	0.000138094	70.889	3
	KFZ67_07930	46	K	TonB-dependent hemoglobin/transferrin/lactoferrin family receptor OS=Photobacterium damselae OX=38293 GN=CTM90_14675 PE=3 SV=1	CTM90_14675	2	-1.3232	3	SEQSVK(1)NIPSTVSK	1	4.13306e-10	104.95	1	4.13306e-10	104.95	1	0.000269798	64.52	3
	KFZ67_07930	444	K	TonB-dependent hemoglobin/transferrin/lactoferrin family receptor OS=Photobacterium damselae OX=38293 GN=CTM90_14675 PE=3 SV=1	CTM90_14675	2	1.5924	2	YDDYQAK(1)PDSDTLK	1	0.00413761	40.278	1	0.00413761	40.278	1	0.00413761	40.278	3
	KFZ67_07930	451	K	TonB-dependent hemoglobin/transferrin/lactoferrin family receptor OS=Photobacterium damselae OX=38293 GN=CTM90_14675 PE=3 SV=1	CTM90_14675	4	-0.52139	3	YDDYQAKPDSDTLK(1)DHK	1	1.5358e-07	84.195	0.999987	5.96254e-06	66.809	1	1.5358e-07	84.195	3
	KFZ67_04095	256	K	Outer membrane protein II OS=Photobacterium damselae OX=38293 GN=ompA_1 PE=3 SV=1	ompA_1	2	-0.28446	5	GSEAYNQK(1)LSVK(1)R	1	9.136e-13	117.79	1	2.76835e-06	89.301	1	9.136e-13	117.79	3
	KFZ67_07930	502	K	TonB-dependent hemoglobin/transferrin/lactoferrin family receptor OS=Photobacterium damselae OX=38293 GN=CTM90_14675 PE=3 SV=1	CTM90_14675	4	0.35889	4	ENLAHGYK(1)VISNPNLKPEESDAVELGLR	0.999991	2.0026e-18	88.394	0.997934	2.65435e-09	70.145	0.999991	2.0026e-18	88.394	3
	KFZ67_04095	252	K	Outer membrane protein II OS=Photobacterium damselae OX=38293 GN=ompA_1 PE=3 SV=1	ompA_1	2	-0.28446	23	GSEAYNQK(1)LSVK(1)R	1	1.25855e-19	136.38	1	1.5685e-11	122.33	1	1.25855e-19	136.38	3
	KFZ67_03500	189	K	LPS-assembly lipoprotein LptE OS=Photobacterium damselae OX=38293 GN=lptE PE=3 SV=1	lptE	3	-0.39242	3	IAEEEHNDALADTLPGK(1)SSVTTEK	1	2.04296e-11	82.475	1	2.89673e-07	65.534	1	2.04296e-11	82.475	3
	KFZ67_03915	309	K	Outer membrane pore protein E OS=Photobacterium damselae subsp. damselae OX=85581 GN=phoE_2 PE=4 SV=1	phoE_2	3	2.9027	2	SLENEGGDETEYKDTTLEAQYK(1)LTDR	0.999903	8.40082e-05	46.862	0.999903	8.40082e-05	46.862	0.999603	0.000248774	40.625	3
	KFZ67_04095	96	K	Outer membrane protein II OS=Photobacterium damselae OX=38293 GN=ompA_1 PE=3 SV=1	ompA_1	3	-2.0714	4	FTAQGADIVGK(1)YSYAINDK	1	3.19176e-17	109.77	1	3.19176e-17	109.77	1	1.65952e-12	95.365	3
	KFZ67_10655	53	K	Flagellar L-ring protein OS=Photobacterium damselae OX=38293 GN=flgH PE=3 SV=1	flgH	2	-0.63706	3	GLIDK(1)LR	1	0.000789413	100.07	1	0.000789413	100.07	1	0.000789413	100.07	3
	KFZ67_18070	106	K	Copper homeostasis protein CutF OS=Photobacterium damselae OX=38293 GN=nlpE PE=4 SV=1	nlpE	2	-0.15435	5	SADGK(1)SDSNYFVGENR	1	1.98869e-06	78.326	1	0.000104909	57.148	1	1.98869e-06	78.326	3
	KFZ67_18070	139	K	Copper homeostasis protein CutF OS=Photobacterium damselae OX=38293 GN=nlpE PE=4 SV=1	nlpE	2	2.1674	3	VTGPLADNYSLK(1)K	1	0.000223198	71.879	1	0.000514581	64.244	1	0.000223198	71.879	3
	KFZ67_16045	94	K	OmpA family protein OS=Photobacterium damselae OX=38293 GN=oprF_2 PE=4 SV=1	oprF_2	3	0.9428	4	K(1)TAQFLETFPETHIELK	1	7.34704e-09	86.016	1	7.34704e-09	86.016	1	3.98102e-07	78.925	3
	KFZ67_16040	133	K	Agglutination protein OS=Photobacterium damselae subsp. damselae OX=85581 GN=CAY62_19665 PE=4 SV=1	CAY62_19665	2	-3.8011	2	AEAVLK(1)LSESNYK	1	0.00111145	56.569	1	0.00111145	56.569	1	0.00277139	41.621	3
	KFZ67_16040	355	K	Agglutination protein OS=Photobacterium damselae subsp. damselae OX=85581 GN=CAY62_19665 PE=4 SV=1	CAY62_19665	2	-0.041052	3	TVIAYEK(1)QFK	1	0.000655095	72.2	1	0.000655095	72.2	1	0.000655095	72.2	3
	KFZ67_15590	130	K	Maltoporin OS=Photobacterium damselae OX=38293 GN=lamB PE=2 SV=1	lamB	3	-0.46546	6	GVLGFAPEATLWAGK(1)R	1	1.00399e-05	67.136	1	1.00399e-05	67.136	1	1.00399e-05	67.136	3
	KFZ67_18070	78	K	Copper homeostasis protein CutF OS=Photobacterium damselae OX=38293 GN=nlpE PE=4 SV=1	nlpE	2	1.4466	4	ADGNYTLDETYQGK(1)K	1	4.66311e-08	87.519	1	5.02658e-06	73.928	1	4.66311e-08	87.519	3
	KFZ67_12595	46	K	Outer membrane channel protein TolC OS=Photobacterium damselae OX=38293 GN=BST98_12555 PE=4 SV=1	BST98_12555	2	-0.01591	3	AAADK(1)DAAFEAINSAR	1	1.56833e-09	97.291	1	1.81646e-05	63.614	1	1.56833e-09	97.291	3
	KFZ67_12595	259	K	Outer membrane channel protein TolC OS=Photobacterium damselae OX=38293 GN=BST98_12555 PE=4 SV=1	BST98_12555	3	-0.1222	7	NK(1)ISLAESGHLPTLSFDTGYSYDQTR	1	4.20517e-17	93.876	1	3.69173e-11	73.676	1	4.20517e-17	93.876	3
	KFZ67_12595	221	K	Outer membrane channel protein TolC OS=Photobacterium damselae OX=38293 GN=BST98_12555 PE=4 SV=1	BST98_12555	3	0.22357	5	NLDILDTK(1)SFSASNPGKPVNDLVK	0.999917	4.89153e-07	63.376	0.999874	5.70327e-07	61.736	0.999917	4.89153e-07	63.376	3
	KFZ67_12595	41	K	Outer membrane channel protein TolC OS=Photobacterium damselae OX=38293 GN=BST98_12555 PE=4 SV=1	BST98_12555	2	-1.3871	2	QNDPQLLK(1)AAADK	1	2.93218e-06	85.837	1	0.00140561	53.3	1	2.93218e-06	85.837	3
	KFZ67_12005	290	K	Porin OS=Photobacterium iliopiscarium OX=56192 GN=C9I88_07910 PE=4 SV=1	C9I88_07910	2	-1.8967	10	STYNYMEK(1)TTDANVK	1	5.06381e-08	87.824	1	7.90011e-05	59.673	1	5.06381e-08	87.824	3
	KFZ67_12005	172	K	Porin OS=Photobacterium iliopiscarium OX=56192 GN=C9I88_07910 PE=4 SV=1	C9I88_07910	3	3.2607	3	TSNNLLYTGNFGGLTVK(1)ANYVANGK	1	0.00026025	52.654	1	0.000356134	49.555	1	0.00026025	52.654	3
	KFZ67_15590	390	K	Maltoporin OS=Photobacterium damselae OX=38293 GN=lamB PE=2 SV=1	lamB	2	-1.2297	5	LYASYLK(1)NDDGK	1	1.26314e-07	107.97	1	1.26314e-07	107.97	1	1.062e-05	85.554	3
	KFZ67_10395	254	K	Aromatic hydrocarbon degradation protein OS=Photobacterium damselae subsp. damselae OX=85581 GN=CAY62_03725 PE=4 SV=1	CAY62_03725	3	1.9995	2	GDMSYAAADITNHK(1)LK	1	1.33429e-05	62.104	1	1.33429e-05	62.104	1	0.000157495	50.827	3
Periplasmic	KFZ67_03770	70	K	Bifunctional UDP-sugar hydrolase/5'-nucleotidase periplasmic OS=Photobacterium damselae OX=38293 GN=ushA PE=3 SV=1	ushA	2	0.64849	2	TLLDK(1)LR	1	2.14687e-19	116.54	1	2.14687e-19	116.54	1	0.000583211	102.71	3
	KFZ67_03770	488	K	Bifunctional UDP-sugar hydrolase/5'-nucleotidase periplasmic OS=Photobacterium damselae OX=38293 GN=ushA PE=3 SV=1	ushA	2	1.1811	2	IGGK(1)ALNPTATYR	1	2.38581e-06	88.075	1	2.38581e-06	88.075	1	0.000137832	76.728	3
	KFZ67_03770	403	K	Bifunctional UDP-sugar hydrolase/5'-nucleotidase periplasmic OS=Photobacterium damselae OX=38293 GN=ushA PE=3 SV=1	ushA	2	-0.83802	3	AK(1)ADFAVMNSGGVR	1	1.119e-05	84.173	1	0.000512417	58.079	1	1.119e-05	84.173	3
	KFZ67_04715	30	K	Superoxide dismutase OS=Photobacterium damselae OX=38293 GN=sodB PE=3 SV=1	sodB	4	-0.074558	4	DALEPHISAETIEYHYGK(1)HHNTYVVK	1	7.59448e-17	90.836	1	1.8701e-07	62.871	1	7.59448e-17	90.836	3
	KFZ67_04865	205	K	Oligopeptide ABC transporter substrate-binding protein OppA OS=Photobacterium damselae OX=38293 GN=CTM90_14010 PE=4 SV=1	CTM90_14010	3	-2.1866	2	TVAAHGDK(1)WTSVDNYVSNGAYK	1	1.71572e-27	117.4	1	3.24333e-21	98.684	1	1.71572e-27	117.4	3
	KFZ67_04865	519	K	Oligopeptide ABC transporter substrate-binding protein OppA OS=Photobacterium damselae OX=38293 GN=CTM90_14010 PE=4 SV=1	CTM90_14010	2	2.1988	4	LVNPK(1)VGGYPMK	1	1.04113e-05	85.813	1	0.000242017	74.962	1	1.04113e-05	85.813	3
	KFZ67_04865	408	K	Oligopeptide ABC transporter substrate-binding protein OppA OS=Photobacterium damselae OX=38293 GN=CTM90_14010 PE=4 SV=1	CTM90_14010	2	-1.5857	3	IAVAIASMWK(1)K	1	0.000199767	78.342	1	0.00139163	61.344	1	0.000199767	78.342	3
	KFZ67_04865	409	K	Oligopeptide ABC transporter substrate-binding protein OppA OS=Photobacterium damselae OX=38293 GN=CTM90_14010 PE=4 SV=1	CTM90_14010	2	0.58213	5	K(1)SLGVTANLENQEWK	1	6.14477e-37	154.69	1	2.15571e-28	136.81	1	6.14477e-37	154.69	3
	KFZ67_04865	364	K	Oligopeptide ABC transporter substrate-binding protein OppA OS=Photobacterium damselae OX=38293 GN=CTM90_14010 PE=4 SV=1	CTM90_14010	3	0.10447	7	GETPAYNFTPLATNGIEVDLPDYSSLSQK(1)ER	1	1.09693e-19	94.841	1	1.92762e-13	74.568	1	1.09693e-19	94.841	3
	KFZ67_04865	397	K	Oligopeptide ABC transporter substrate-binding protein OppA OS=Photobacterium damselae OX=38293 GN=CTM90_14010 PE=4 SV=1	CTM90_14010	3	1.7862	2	EAGYGDKPLTFDLLYNTSENHK(1)K	1	3.5253e-11	83.047	1	3.5253e-11	83.047	0.999999	6.92743e-07	62.781	3
	KFZ67_06410	74	K	Peptide permease OS=Photobacterium damselae subsp. damselae OX=85581 GN=dsbL PE=4 SV=1	dsbL	2	-0.45772	2	LAGIK(1)DIR	1	0.0270131	50.04	1	0.0270131	50.04	1	0.0270131	50.04	3
	KFZ67_02350	111	K	Oxidative stress defense protein OS=Photobacterium damsela subsp. piscicida OX=38294 GN=BEI67_02215 PE=4 SV=1	BEI67_02215	2	-0.044567	3	DAKPELTGYK(1)ASR	1	1.7181e-30	155.66	1	8.76668e-23	145	1	1.7181e-30	155.66	3
	KFZ67_04865	317	K	Oligopeptide ABC transporter substrate-binding protein OppA OS=Photobacterium damselae OX=38293 GN=CTM90_14010 PE=4 SV=1	CTM90_14010	2	0.40946	8	K(1)ALSYAIDR	1	7.32133e-12	132.39	1	2.03379e-11	128.27	1	7.32133e-12	132.39	3
	KFZ67_02350	147	K	Oxidative stress defense protein OS=Photobacterium damsela subsp. piscicida OX=38294 GN=BEI67_02215 PE=4 SV=1	BEI67_02215	2	-0.76693	3	IDNIQLK(1)VADEAK	1	1.40064e-07	97.273	1	1.5138e-05	84.753	1	1.40064e-07	97.273	3
	KFZ67_01760	100	K	Periplasmic serine endoprotease DegP-like OS=Photobacterium damselae OX=38293 GN=BST98_01765 PE=3 SV=1	BST98_01765	2	-0.8752	2	GLGSGVIIDAK(1)K	1	8.61235e-06	86.772	1	8.61235e-06	86.772	1	0.000172858	77.185	3
	KFZ67_02350	164	K	Oxidative stress defense protein OS=Photobacterium damsela subsp. piscicida OX=38294 GN=BEI67_02215 PE=4 SV=1	BEI67_02215	2	-0.86138	2	QAAIK(1)DAISTAK	1	1.36286e-09	114.27	1	1.36286e-09	114.27	1	5.26265e-07	101.01	3
	KFZ67_02350	101	K	Oxidative stress defense protein OS=Photobacterium damsela subsp. piscicida OX=38294 GN=BEI67_02215 PE=4 SV=1	BEI67_02215	2	1.2232	6	YPK(1)DAKPELTGYK	0.999855	1.23298e-08	102.9	0.999795	1.23298e-08	102.9	0.999855	1.96872e-05	89.507	3
	KFZ67_02040	294	K	Iron ABC transporter substrate-binding protein OS=Photobacterium damselae OX=38293 GN=futA1 PE=4 SV=1	futA1	3	-2.6678	3	AQQMYAEVNYEYPVK(1)NGVK	1	1.22559e-09	75.548	1	1.68786e-07	71.263	1	1.22559e-09	75.548	3
	KFZ67_02040	91	K	Iron ABC transporter substrate-binding protein OS=Photobacterium damselae OX=38293 GN=futA1 PE=4 SV=1	futA1	2	-0.98689	6	K(1)LVQAVDNK	1	4.79068e-25	157.99	1	4.79068e-25	157.99	1	6.32865e-13	134.51	3
	KFZ67_02040	90	K	Iron ABC transporter substrate-binding protein OS=Photobacterium damselae OX=38293 GN=futA1 PE=4 SV=1	futA1	2	0.99698	3	LVELSDK(1)K	1	0.00722486	68.016	1	0.0249025	49.444	1	0.00722486	68.016	3
	KFZ67_01760	388	K	Periplasmic serine endoprotease DegP-like OS=Photobacterium damselae OX=38293 GN=BST98_01765 PE=3 SV=1	BST98_01765	3	-0.40458	4	ADDLHESLAGAEFANTSPEDK(1)VHGVK	1	2.70766e-25	109.68	1	2.74914e-24	105.61	1	2.70766e-25	109.68	3
	KFZ67_01760	350	K	Periplasmic serine endoprotease DegP-like OS=Photobacterium damselae OX=38293 GN=BST98_01765 PE=3 SV=1	BST98_01765	2	-2.003	3	DGK(1)ELNVPVTLEAAK	1	3.76282e-05	61.127	1	0.000961942	46.249	1	3.76282e-05	61.127	3
	KFZ67_01760	339	K	Periplasmic serine endoprotease DegP-like OS=Photobacterium damselae OX=38293 GN=BST98_01765 PE=3 SV=1	BST98_01765	2	0.67614	2	IATLGAGK(1)K	1	0.000176569	95.502	1	0.000176569	95.502	1	0.000759624	83.948	3
	KFZ67_01760	399	K	Periplasmic serine endoprotease DegP-like OS=Photobacterium damselae OX=38293 GN=BST98_01765 PE=3 SV=1	BST98_01765	2	0.28504	5	VTELNK(1)QSIAAR	1	3.88454e-89	208.79	1	2.41858e-75	206.36	1	3.88454e-89	208.79	3
	KFZ67_00830	138	K	Stress adaptor protein CpxP OS=Photobacterium damselae OX=38293 GN=cpxP PE=4 SV=1	cpxP	2	-3.6643	2	MLNILTPEQK(1)EK	1	0.00458433	44.367	1	0.00732493	44.367	1	0.00458433	40.475	3
	KFZ67_07575	131	K	Formate dehydrogenase OS=Photobacterium damselae OX=38293 GN=fdnG PE=3 SV=1	fdnG	2	0.82363	3	LVNGK(1)WQR	1	4.11816e-11	128.57	1	0.00095075	89.55	1	4.11816e-11	128.57	3
	KFZ67_07575	736	K	Formate dehydrogenase OS=Photobacterium damselae OX=38293 GN=fdnG PE=3 SV=1	fdnG	2	-1.8663	4	NWK(1)TDLSGGIQR	1	1.16524e-13	123.67	1	3.48046e-06	94.402	1	1.16524e-13	123.67	3
	KFZ67_07575	450	K	Formate dehydrogenase OS=Photobacterium damselae OX=38293 GN=fdnG PE=3 SV=1	fdnG	2	-1.3933	8	PMNSK(1)GIPVSR	1	6.92879e-10	120.77	1	6.92879e-10	120.77	1	5.88167e-06	93.345	3
	KFZ67_02350	153	K	Oxidative stress defense protein OS=Photobacterium damsela subsp. piscicida OX=38294 GN=BEI67_02215 PE=4 SV=1	BEI67_02215	2	0.11233	4	VADEAK(1)YQEQAR	1	5.95384e-49	182.71	1	5.95384e-49	182.71	1	6.21279e-37	163.51	3
	KFZ67_07555	97	K	Putrescine-binding periplasmic protein OS=Photobacterium damselae OX=38293 GN=potD PE=3 SV=1	potD	3	-1.8595	3	MRDEGMLQK(1)IDHSK	1	0.00048999	58.577	1	0.000566528	57.288	1	0.00048999	58.577	3
	KFZ67_04865	382	K	Oligopeptide ABC transporter substrate-binding protein OppA OS=Photobacterium damselae OX=38293 GN=CTM90_14010 PE=4 SV=1	CTM90_14010	3	-0.9568	5	EAGYGDK(1)PLTFDLLYNTSENHK	1	3.04304e-27	113.51	1	3.7664e-07	62.099	1	3.04304e-27	113.51	3
	KFZ67_07555	272	K	Putrescine-binding periplasmic protein OS=Photobacterium damselae OX=38293 GN=potD PE=3 SV=1	potD	3	-0.44088	4	HIDAAYK(1)MIDFLLRPENAAK	1	2.81406e-22	118.37	1	2.81406e-22	118.37	1	1.86801e-16	103.9	3
	KFZ67_07555	186	K	Putrescine-binding periplasmic protein OS=Photobacterium damselae OX=38293 GN=potD PE=3 SV=1	potD	2	0.95009	3	LGYSGNTK(1)DPAQIK	1	0.000698719	54.898	1	0.00413761	40.278	1	0.000698719	54.898	3
	KFZ67_10865	162	K	Periplasmic nitrate reductase, electron transfer subunit OS=Photobacterium damsela subsp. piscicida OX=38294 GN=BEI67_10510 PE=3 SV=1	BEI67_10510	2	2.343	3	PLVGNQFK(1)R	1	1.30679e-24	155.75	1	1.30679e-24	155.75	1	4.13721e-17	141.39	3
	KFZ67_10870	446	K	Periplasmic nitrate reductase OS=Photobacterium damselae OX=38293 GN=napA PE=3 SV=1	napA	2	-0.5057	3	AIAEK(1)IWK	1	0.00984472	64.265	1	0.00984472	64.265	1	0.00984472	64.265	3
	KFZ67_10870	439	K	Periplasmic nitrate reductase OS=Photobacterium damselae OX=38293 GN=napA PE=3 SV=1	napA	3	-0.10542	6	LPADMVVANPK(1)HR	1	5.03267e-05	80.69	1	8.11315e-05	77.597	1	5.03267e-05	80.69	3
	KFZ67_11010	49	K	Peptidyl-prolyl cis-trans isomerase OS=Photobacterium damselae OX=38293 GN=ppiA PE=3 SV=1	ppiA	2	-0.4501	3	APISSANFLK(1)YVK	1	5.61825e-05	82.069	1	5.61825e-05	82.069	1	0.000263471	71.558	3
	KFZ67_13130	201	K	2',3'-cyclic-nucleotide 2'-phosphodiesterase OS=Photobacterium damselae OX=38293 GN=cpdB PE=3 SV=1	cpdB	2	0.053078	3	NLEGK(1)VEAK	1	0.00388921	64.374	1	0.00388921	64.374	1	0.00977403	54.539	3
	KFZ67_15575	48	K	Maltodextrin-binding protein OS=Photobacterium damselae OX=38293 GN=malE_2 PE=3 SV=1	malE_2	2	1.4907	3	GYNGLAEVGK(1)K	1	8.18592e-05	83.045	1	8.18592e-05	83.045	1	0.000317835	73.632	3
	KFZ67_17895	135	K	ABC transporter substrate-binding protein OS=Photobacterium damselae OX=38293 GN=BST98_19615 PE=4 SV=1	BST98_19615	2	1.2427	3	DPSLATIAGIK(1)K	1	0.000773387	64.827	1	0.00891562	41.495	1	0.000773387	64.827	3
	KFZ67_16620	107	K	Kinase inhibitor OS=Photobacterium damselae OX=38293 GN=ybcL PE=4 SV=1	ybcL	3	-0.30963	2	EGAGNVDGK(1)NLPAGASMVTNDFGFK	1	3.6538e-07	59.912	1	3.6538e-07	59.912	1	4.35848e-07	59.359	3
	KFZ67_16620	133	K	Kinase inhibitor OS=Photobacterium damselae OX=38293 GN=ybcL PE=4 SV=1	ybcL	2	-0.95634	4	GFGGACPPPK(1)AK	1	0.00127244	60.196	1	0.00275915	51.939	1	0.00127244	60.196	3
	KFZ67_16620	173	K	Kinase inhibitor OS=Photobacterium damselae OX=38293 GN=ybcL PE=4 SV=1	ybcL	4	-0.28759	4	IDLPANASPALAGYNILGHVIGK(1)AELIAPTNTR	1	1.78768e-12	61.099	1	9.25064e-10	60.288	1	1.78768e-12	61.099	3
	KFZ67_09930	167	K	High-affinity zinc uptake system protein znuA OS=Photobacterium damselae OX=38293 GN=znuA PE=3 SV=1	znuA	3	-1.1101	3	VITQQLVK(1)QDPLHK	1	5.85095e-10	99.991	1	0.00019548	64.499	1	5.85095e-10	99.991	3
	KFZ67_13995	65	K	Thiol:disulfide interchange protein OS=Photobacterium damselae OX=38293 GN=CTM90_17720 PE=3 SV=1	CTM90_17720	2	0.32624	6	K(1)TLPENATFQK	1	5.87285e-10	120.86	1	3.95754e-07	107.09	1	5.87285e-10	120.86	3
	KFZ67_08270	58	K	Cystatin domain-containing protein OS=Photobacterium damselae subsp. damselae OX=85581 GN=CAY62_05765 PE=4 SV=1	CAY62_05765	3	0.31522	4	DLLNTASEK(1)AGELGDSAK	1	1.0495e-35	137.73	1	5.667e-16	106.57	1	1.0495e-35	137.73	3
	KFZ67_15595	233	K	Transcriptional regulator OS=Photobacterium damselae OX=38293 GN=CTM90_03445 PE=4 SV=1	CTM90_03445	2	1.2653	3	SYYLDGIK(1)QAVK	1	0.00216096	55.261	1	0.00409831	41.684	1	0.00216096	55.261	3
	KFZ67_08270	154	K	Cystatin domain-containing protein OS=Photobacterium damselae subsp. damselae OX=85581 GN=CAY62_05765 PE=4 SV=1	CAY62_05765	3	1.0536	12	GEITPEVIDAANAAVK(1)SLGADQK	1	4.4336e-16	88.627	1	4.4336e-16	88.627	1	4.46824e-16	88.555	3
	KFZ67_07555	192	K	Putrescine-binding periplasmic protein OS=Photobacterium damselae OX=38293 GN=potD PE=3 SV=1	potD	2	-4.0683	8	DPAQIK(1)AAYEELK	1	1.12389e-06	93.243	1	9.08144e-05	79.804	1	1.12389e-06	93.243	3
	KFZ67_08270	67	K	Cystatin domain-containing protein OS=Photobacterium damselae subsp. damselae OX=85581 GN=CAY62_05765 PE=4 SV=1	CAY62_05765	3	1.3133	3	AGELGDSAK(1)AAADDASQK	1	1.29732e-11	87.006	1	1.29732e-11	87.006	1	2.2407e-09	75.564	3
	KFZ67_07555	199	K	Putrescine-binding periplasmic protein OS=Photobacterium damselae OX=38293 GN=potD PE=3 SV=1	potD	2	-1.2243	4	AAYEELK(1)K	1	0.00713789	68.224	1	0.00713789	68.224	1	0.00713789	68.224	3
	KFZ67_08835	691	K	Trimethylamine N-oxide reductase I catalytic subunit OS=Photobacterium damselae OX=38293 GN=BST98_08850 PE=3 SV=1	BST98_08850	3	-2.254	4	SDKYPLWLQSCHPPK(1)R	1	8.94597e-14	104.95	1	1.63515e-06	79.346	1	8.94597e-14	104.95	3
	KFZ67_08835	349	K	Trimethylamine N-oxide reductase I catalytic subunit OS=Photobacterium damselae OX=38293 GN=BST98_08850 PE=3 SV=1	BST98_08850	2	-0.30971	3	ADEIQK(1)FAR	1	2.27422e-05	107.06	1	0.00016393	96.229	1	2.27422e-05	107.06	3
	KFZ67_08270	199	K	Cystatin domain-containing protein OS=Photobacterium damselae subsp. damselae OX=85581 GN=CAY62_05765 PE=4 SV=1	CAY62_05765	2	-0.75833	7	SLK(1)GEYDVK	1	0.00640054	58.699	1	0.00714198	57.785	1	0.00640054	58.699	3
	KFZ67_08835	179	K	Trimethylamine N-oxide reductase I catalytic subunit OS=Photobacterium damselae OX=38293 GN=BST98_08850 PE=3 SV=1	BST98_08850	2	1.3139	2	AVGMYGNFIK(1)K	1	0.000886366	56.548	1	0.000886366	56.548	1	0.000886366	56.548	3
	KFZ67_08270	205	K	Cystatin domain-containing protein OS=Photobacterium damselae subsp. damselae OX=85581 GN=CAY62_05765 PE=4 SV=1	CAY62_05765	2	0.0098718	4	GEYDVK(1)EVK	1	0.00443836	61.593	1	0.0124203	51.276	1	0.00443836	61.593	3
	KFZ67_08270	161	K	Cystatin domain-containing protein OS=Photobacterium damselae subsp. damselae OX=85581 GN=CAY62_05765 PE=4 SV=1	CAY62_05765	2	0.91216	3	SLGADQK(1)LK	1	0.000596101	86.882	1	0.00065947	85.533	1	0.000596101	86.882	3
	KFZ67_08270	188	K	Cystatin domain-containing protein OS=Photobacterium damselae subsp. damselae OX=85581 GN=CAY62_05765 PE=4 SV=1	CAY62_05765	2	0.15839	11	FTTEDGK(1)EYAAK	1	4.8586e-07	101.71	1	4.8586e-07	101.71	1	6.758e-07	98.407	3
	KFZ67_08270	85	K	Cystatin domain-containing protein OS=Photobacterium damselae subsp. damselae OX=85581 GN=CAY62_05765 PE=4 SV=1	CAY62_05765	2	0.94061	3	ELSDSAK(1)VAASDMSDK	1	8.1127e-05	58.246	1	8.1127e-05	58.246	1	0.00107665	44.998	3
	KFZ67_08270	40	K	Cystatin domain-containing protein OS=Photobacterium damselae subsp. damselae OX=85581 GN=CAY62_05765 PE=4 SV=1	CAY62_05765	3	0.72024	3	QDTQVEAQAELQQK(1)AADLQESAK	1	1.02708e-76	178.84	1	4.20297e-65	169.77	1	1.02708e-76	178.84	3
	KFZ67_08270	26	K	Cystatin domain-containing protein OS=Photobacterium damselae subsp. damselae OX=85581 GN=CAY62_05765 PE=4 SV=1	CAY62_05765	3	-0.40061	4	DPQPK(1)QDTQVEAQAELQQK	1	4.05719e-10	82.609	1	2.53351e-07	70.555	1	4.05719e-10	82.609	3
	KFZ67_08270	119	K	Cystatin domain-containing protein OS=Photobacterium damselae subsp. damselae OX=85581 GN=CAY62_05765 PE=4 SV=1	CAY62_05765	4	0.65057	3	K(1)ATSPECAESHHSLPGGWSK	1	1.75226e-07	70.987	1	0.000372705	45.885	1	1.75226e-07	70.987	3
Unknown	KFZ67_01195	37	K	30S ribosomal protein S10 OS=Photobacterium damsela subsp. piscicida OX=38294 GN=rpsJ PE=3 SV=1	rpsJ	2	1.3442	3	TGAQVK(1)GPIPLPTR	1	1.03299e-12	110.44	1	4.78611e-05	79.036	1	1.03299e-12	110.44	3
	KFZ67_00915	47	K	50S ribosomal protein L31 OS=Photobacterium damsela subsp. piscicida OX=38294 GN=rpmE PE=3 SV=1	rpmE	2	-1.1878	3	CHPFYTGK(1)QR	1	0.000209155	88.495	1	0.00813349	48.981	1	0.000209155	88.495	3
	KFZ67_01195	11	K	30S ribosomal protein S10 OS=Photobacterium damsela subsp. piscicida OX=38294 GN=rpsJ PE=3 SV=1	rpsJ	2	-0.0054974	3	LK(1)AFDHR	1	1.10781e-15	139.28	1	1.10781e-15	139.28	1	9.63685e-11	133.12	3
	KFZ67_19450	173	K	Ribose ABC transporter substrate-binding protein RbsB OS=Photobacterium damselae OX=38293 GN=CTM90_07445 PE=4 SV=1	CTM90_07445	2	-1.3472	3	GQGFMDAVK(1)K	1	0.00726113	48.998	1	0.00872943	47.971	1	0.00726113	48.998	3
	KFZ67_00865	480	K	Glycerol kinase OS=Photobacterium damsela subsp. piscicida OX=38294 GN=glpK PE=3 SV=1	glpK	2	0.12982	3	FVPCQDDNK(1)R	1	2.73359e-17	135.55	1	2.73359e-17	135.55	1	3.90753e-08	119.68	3
	KFZ67_00890	426	K	ATP-dependent protease ATPase subunit HslU OS=Photobacterium damselae OX=38293 GN=hslU PE=3 SV=1	hslU	2	-0.014999	4	ITAEYVK(1)ER	1	2.57255e-08	121.73	1	0.000595338	86.898	1	2.57255e-08	121.73	3
	KFZ67_00915	2	K	50S ribosomal protein L31 OS=Photobacterium damsela subsp. piscicida OX=38294 GN=rpmE PE=3 SV=1	rpmE	3	-2.5283	7	MK(1)QGIHPEYTAVNAR	1	8.04911e-12	99.927	1	4.42557e-08	85.739	1	8.04911e-12	99.927	3
	KFZ67_00945	156	K	Phosphoenolpyruvate carboxylase OS=Photobacterium damselae OX=38293 GN=ppc PE=3 SV=1	ppc	2	2.0717	3	LVQINK(1)CLSK	1	0.000452132	81.335	1	0.000466514	81.017	1	0.000452132	81.335	3
	KFZ67_01150	90	K	Peptidyl-prolyl cis-trans isomerase OS=Photobacterium damselae OX=38293 GN=BST98_01135 PE=3 SV=1	BST98_01135	3	0.65004	11	K(1)DVLAGVEDVFADK	1	5.69128e-05	76.82	1	5.69128e-05	76.82	1	0.000189259	67.326	3
	KFZ67_00985	64	K	Penicillin-sensitive transpeptidase OS=Photobacterium damselae subsp. damselae OX=85581 GN=CAY62_13185 PE=4 SV=1	CAY62_13185	2	-1.2561	3	LISQFGEK(1)R	1	9.41057e-18	145.72	1	2.94446e-07	113.62	1	9.41057e-18	145.72	3
	KFZ67_01050	328	K	Tryptophan--tRNA ligase OS=Photobacterium damsela subsp. piscicida OX=38294 GN=trpS PE=3 SV=1	trpS	2	-1.6477	3	K(1)AYQAVGFVTRPE	1	1.08684e-08	103.76	1	8.86808e-06	94.09	1	1.08684e-08	103.76	3
	KFZ67_01065	311	K	Acetylornithine aminotransferase OS=Photobacterium damselae subsp. damselae OX=85581 GN=argD PE=3 SV=1	argD	3	0.26568	4	AAISEIIKPELLAGVK(1)ER	1	1.06545e-15	105.06	0.999999	1.67532e-11	87.24	1	1.06545e-15	105.06	3
	KFZ67_01070	242	K	Arginine N-succinyltransferase OS=Photobacterium damselae OX=38293 GN=astA PE=4 SV=1	astA	2	0.841	3	LLEK(1)EGFCNR	1	1.82593e-17	140.16	1	1.82593e-17	140.16	1	6.80066e-05	96.342	3
	KFZ67_01150	139	K	Peptidyl-prolyl cis-trans isomerase OS=Photobacterium damselae OX=38293 GN=BST98_01135 PE=3 SV=1	BST98_01135	2	-0.77696	7	QESEQNLK(1)AGTEFR	1	1.72155e-149	246.64	1	8.94745e-95	217.68	1	1.72155e-149	246.64	3
	KFZ67_01150	185	K	Peptidyl-prolyl cis-trans isomerase OS=Photobacterium damselae OX=38293 GN=BST98_01135 PE=3 SV=1	BST98_01135	3	-0.93689	3	PVATDTVEVHYK(1)GTLIDGTEFDSSYK	1	1.04032e-17	86.918	1	1.04032e-17	86.918	1	1.57183e-16	80.68	3
	KFZ67_01150	167	K	Peptidyl-prolyl cis-trans isomerase OS=Photobacterium damselae OX=38293 GN=BST98_01135 PE=3 SV=1	BST98_01135	4	-0.56599	3	IEK(0.952)EGTGPK(0.048)PVATDTVEVHYK	0.951804	1.58226e-06	62.65	0.951804	9.05548e-06	60.454	0.901521	1.58226e-06	62.65	3
	KFZ67_01285	155	K	30S ribosomal protein S5 OS=Photobacterium damselae OX=38293 GN=rpsE PE=3 SV=1	rpsE	3	-0.31953	7	ATIDGLSGMNSPEMIAAK(1)R	1	1.56514e-36	144.73	1	3.17851e-36	142.39	1	1.56514e-36	144.73	3
	KFZ67_00975	133	K	Glutathione peroxidase OS=Photobacterium damselae OX=38293 GN=CTM90_12570 PE=4 SV=1	CTM90_12570	2	-0.2572	3	YSMLVK(1)NGVIEK	1	0.000291428	73.082	1	0.00204603	55.899	1	0.000291428	73.082	3
	KFZ67_01285	61	K	30S ribosomal protein S5 OS=Photobacterium damselae OX=38293 GN=rpsE PE=3 SV=1	rpsE	2	1.4376	4	EVPAAIQK(1)AMEK	1	0.000217729	76.073	1	0.000715088	66.989	1	0.000217729	76.073	3
	KFZ67_03145	136	K	Acetyl-coenzyme A carboxylase carboxyl transferase subunit alpha OS=Photobacterium damselae subsp. damselae OX=85581 GN=accA PE=3 SV=1	accA	2	-0.23154	2	NFGMPK(1)PEGYR	1	0.000148501	81.017	1	0.000148501	81.017	1	0.000991815	61.815	3
	KFZ67_01285	85	K	30S ribosomal protein S5 OS=Photobacterium damselae OX=38293 GN=rpsE PE=3 SV=1	rpsE	4	-0.71026	11	NMTNVALNEGTLHHAVK(1)GR	1	1.36254e-94	206.8	1	1.05666e-44	155.2	1	1.36254e-94	206.8	3
	KFZ67_03110	138	K	Chaperone protein skp OS=Photobacterium damsela subsp. piscicida OX=38294 GN=BEI67_02920 PE=3 SV=1	BEI67_02920	2	0.37597	3	TAIDSVAK(1)K	1	0.00448897	60.398	1	0.00448897	60.398	1	0.00484429	59.908	3
	KFZ67_03110	106	K	Chaperone protein skp OS=Photobacterium damsela subsp. piscicida OX=38294 GN=BEI67_02920 PE=3 SV=1	BEI67_02920	2	3.8395	8	LK(1)AQALAEDQR	1	1.33196e-05	90.614	1	1.80272e-05	87.667	1	1.33196e-05	90.614	3
	KFZ67_03110	139	K	Chaperone protein skp OS=Photobacterium damsela subsp. piscicida OX=38294 GN=BEI67_02920 PE=3 SV=1	BEI67_02920	3	0.31222	3	K(1)EGYNLVLDANAVLFASK	1	2.2591e-09	76.301	1	8.39754e-07	65.374	1	2.2591e-09	76.301	3
	KFZ67_03110	163	K	Chaperone protein skp OS=Photobacterium damsela subsp. piscicida OX=38294 GN=BEI67_02920 PE=3 SV=1	BEI67_02920	2	-0.11232	3	KDDLSQK(1)VISAVK	1	3.53145e-16	129.77	1	3.53145e-16	129.77	1	3.53145e-16	129.77	3
	KFZ67_03110	124	K	Chaperone protein skp OS=Photobacterium damsela subsp. piscicida OX=38294 GN=BEI67_02920 PE=3 SV=1	BEI67_02920	2	1.3789	5	GQEEEQK(1)LVMK	1	0.000878521	68.132	1	0.00102279	61.344	1	0.000878521	68.132	3
	KFZ67_01150	150	K	Peptidyl-prolyl cis-trans isomerase OS=Photobacterium damselae OX=38293 GN=BST98_01135 PE=3 SV=1	BST98_01135	2	1.1964	4	FAK(1)EQGVVTTK	1	4.42842e-07	107.09	1	1.23794e-05	91.202	1	4.42842e-07	107.09	3
	KFZ67_03190	61	K	50S ribosomal protein L31 type B OS=Photobacterium damselae OX=38293 GN=rpmE2 PE=3 SV=1	rpmE2	3	1.8635	5	VWQDGQEYPYVTLDVSSDSHPFYTGK(1)QR	1	2.42827e-13	80.981	1	2.42827e-13	80.981	1	1.89086e-09	69.016	3
	KFZ67_03195	8	K	50S ribosomal protein L36 OS=Photobacterium damsela subsp. piscicida OX=38294 GN=rpmJ PE=3 SV=1	rpmJ	2	1.5261	3	MQVLSSLK(1)SAK	1	0.000125626	79.492	1	0.000125626	79.492	1	0.00273339	52.463	3
	KFZ67_03340	42	K	Phosphoheptose isomerase OS=Photobacterium damselae OX=38293 GN=gmhA PE=3 SV=1	gmhA	2	-0.19705	3	LLAESFK(1)QGGK	1	0.00047177	72.2	1	0.000838164	68.536	1	0.00047177	72.2	3
	KFZ67_01295	58	K	50S ribosomal protein L15 OS=Photobacterium damselae OX=38293 GN=rplO PE=3 SV=1	rplO	2	-0.45215	8	PGFEGGQMPLK(1)QR	1	2.8242e-47	160.52	1	5.07453e-05	80.69	1	2.8242e-47	160.52	3
	KFZ67_01295	70	K	50S ribosomal protein L15 OS=Photobacterium damselae OX=38293 GN=rplO PE=3 SV=1	rplO	2	0.69349	3	K(1)GLVSAEIR	1	1.53419e-11	129.85	1	1.53419e-11	129.85	1	1.58029e-07	117.7	3
	KFZ67_01295	29	K	50S ribosomal protein L15 OS=Photobacterium damselae OX=38293 GN=rplO PE=3 SV=1	rplO	2	-1.4788	3	GIGSGLGK(1)TCGR	1	1.82574e-27	150.33	1	9.92002e-20	138.63	1	1.82574e-27	150.33	3
	KFZ67_01295	123	K	50S ribosomal protein L15 OS=Photobacterium damselae OX=38293 GN=rplO PE=3 SV=1	rplO	2	1.3622	3	AVTVK(1)GLR	1	2.48396e-16	134.81	1	3.32971e-07	117.39	1	2.48396e-16	134.81	3
	KFZ67_01280	76	K	50S ribosomal protein L18 OS=Photobacterium damsela subsp. piscicida OX=38294 GN=rplR PE=3 SV=1	rplR	2	-1.1407	3	DAATAVGK(1)AIAER	1	8.4849e-32	157.56	1	8.4849e-32	157.56	1	4.24881e-23	137.62	3
	KFZ67_01285	51	K	30S ribosomal protein S5 OS=Photobacterium damselae OX=38293 GN=rpsE PE=3 SV=1	rpsE	2	-0.46862	2	VGFGYGK(1)AR	1	2.30888e-05	107.01	1	2.30888e-05	107.01	1	0.000183084	95.815	3
	KFZ67_01285	13	K	30S ribosomal protein S5 OS=Photobacterium damselae OX=38293 GN=rpsE PE=3 SV=1	rpsE	2	-0.59769	9	TQSDLHEK(1)LIAVNR	1	1.54725e-52	174.59	1	1.54725e-52	174.59	1	2.68035e-31	147.1	3
	KFZ67_01285	125	K	30S ribosomal protein S5 OS=Photobacterium damselae OX=38293 GN=rpsE PE=3 SV=1	rpsE	3	0.2904	4	NVLAK(1)AYGSTNPINIVR	1	3.01217e-29	135.72	1	5.22203e-23	127.18	1	3.01217e-29	135.72	3
	KFZ67_01285	92	K	30S ribosomal protein S5 OS=Photobacterium damselae OX=38293 GN=rpsE PE=3 SV=1	rpsE	3	-0.064267	24	HTGSK(1)VYMQPASEGTGIIAGGAMR	1	5.00214e-75	166.27	1	2.51715e-42	128.04	1	5.00214e-75	166.27	3
	KFZ67_01150	158	K	Peptidyl-prolyl cis-trans isomerase OS=Photobacterium damselae OX=38293 GN=BST98_01135 PE=3 SV=1	BST98_01135	2	-0.28224	11	EQGVVTTK(1)SGLMYK	1	4.62528e-10	101.3	1	4.62528e-10	101.3	1	7.68358e-07	87.447	3
	KFZ67_01185	273	K	Elongation factor G OS=Photobacterium damselae OX=38293 GN=fusA PE=3 SV=1	fusA	3	1.2184	3	NK(1)GVQAVLDAVIDFLPSPTEVK	1	1.00084e-05	59.537	1	1.00084e-05	59.537	1	0.000162134	47.603	3
	KFZ67_01150	60	K	Peptidyl-prolyl cis-trans isomerase OS=Photobacterium damselae OX=38293 GN=BST98_01135 PE=3 SV=1	BST98_01135	4	-1.1699	2	TEDQK(1)AAYAIGASLAQYLAANLDQQQELGIK	1	2.1501e-19	92.089	1	4.32975e-19	86.261	1	2.1501e-19	92.089	3
	KFZ67_01215	254	K	50S ribosomal protein L2 OS=Photobacterium damsela subsp. piscicida OX=38294 GN=rplB PE=3 SV=1	rplB	2	-0.92322	8	HPVTPWGVPTK(1)GYK	1	6.46539e-10	102.03	1	1.24959e-06	86.738	1	6.46539e-10	102.03	3
	KFZ67_01215	36	K	50S ribosomal protein L2 OS=Photobacterium damsela subsp. piscicida OX=38294 GN=rplB PE=3 SV=1	rplB	2	0.37752	3	GKPYAPLLEK(1)NSK	1	1.11634e-16	133.15	1	1.11634e-16	133.15	1	6.79251e-12	118.76	3
	KFZ67_01215	28	K	50S ribosomal protein L2 OS=Photobacterium damsela subsp. piscicida OX=38294 GN=rplB PE=3 SV=1	rplB	2	1.1428	2	GK(1)PYAPLLEK	1	0.00481792	55.718	1	0.00877667	48.442	1	0.00481792	55.718	3
	KFZ67_01215	5	K	50S ribosomal protein L2 OS=Photobacterium damsela subsp. piscicida OX=38294 GN=rplB PE=3 SV=1	rplB	2	-2.501	3	AIVK(1)CKPTSPGR	1	2.29709e-26	147.62	0.999999	3.34131e-14	134.38	1	2.29709e-26	147.62	3
	KFZ67_01220	7	K	30S ribosomal protein S19 OS=Photobacterium damselae OX=38293 GN=rpsS PE=3 SV=1	rpsS	3	0.4615	3	K(1)GPFIDLHLLK	1	0.00266298	55.04	1	0.00353745	51.359	1	0.00266298	55.04	3
	KFZ67_01225	83	K	50S ribosomal protein L22 OS=Photobacterium aquimaris OX=512643 GN=rplV PE=3 SV=1	rplV	2	0.50564	7	IFVDEGPTMK(1)R	1	1.10191e-60	188.28	1	1.59003e-36	162.38	1	1.10191e-60	188.28	3
	KFZ67_01225	27	K	50S ribosomal protein L22 OS=Photobacterium aquimaris OX=512643 GN=rplV PE=3 SV=1	rplV	3	0.33652	6	GK(1)PVAQALEILNFSNK	1	5.58752e-07	82.822	1	1.30662e-05	63.681	1	5.58752e-07	82.822	3
	KFZ67_01225	49	K	50S ribosomal protein L22 OS=Photobacterium aquimaris OX=512643 GN=rplV PE=3 SV=1	rplV	3	1.5565	5	K(1)VLESAIANAEHNEGADIDDLNVAK	1	8.53652e-08	70.391	1	1.48636e-05	57.051	1	8.53652e-08	70.391	3
	KFZ67_01230	79	K	30S ribosomal protein S3 OS=Photobacterium damselae OX=38293 GN=rpsC PE=3 SV=1	rpsC	2	-0.28555	3	PGVVIGK(1)K	1	0.0018508	83.456	1	0.0018508	83.456	1	0.00474457	74.165	3
	KFZ67_01230	62	K	30S ribosomal protein S3 OS=Photobacterium damselae OX=38293 GN=rpsC PE=3 SV=1	rpsC	3	-0.24008	3	IVIERPAK(1)SIR	1	8.37849e-05	83.182	1	0.000703052	69.554	1	8.37849e-05	83.182	3
	KFZ67_01230	4	K	30S ribosomal protein S3 OS=Photobacterium damselae OX=38293 GN=rpsC PE=3 SV=1	rpsC	3	-0.48892	3	GQK(1)VHPNGIR	1	0.0130992	63.076	1	0.0529131	49.16	1	0.0130992	63.076	3
	KFZ67_01230	220	K	30S ribosomal protein S3 OS=Photobacterium damselae OX=38293 GN=rpsC PE=3 SV=1	rpsC	3	0.86692	6	GEVLGGMPAANAVEPK(0.985)ADK(0.015)PK	0.985186	1.44773e-07	71.853	0.985186	1.44773e-07	71.853	0.923786	9.66466e-07	63.869	3
	KFZ67_01235	71	K	50S ribosomal protein L16 OS=Photobacterium damsela subsp. piscicida OX=38294 GN=rplP PE=3 SV=1	rplP	2	0.40794	2	VFPDK(1)PITSK	1	0.00237077	60.691	1	0.00237077	60.691	1	0.00587647	53.567	3
	KFZ67_01235	133	K	50S ribosomal protein L16 OS=Photobacterium damsela subsp. piscicida OX=38294 GN=rplP PE=3 SV=1	rplP	2	1.793	6	TTFVTK(1)AVM	1	0.00059371	83.499	1	0.00059371	83.499	1	0.00171361	70.856	3
	KFZ67_01235	127	K	50S ribosomal protein L16 OS=Photobacterium damsela subsp. piscicida OX=38294 GN=rplP PE=3 SV=1	rplP	2	0.2594	3	KLPIK(1)TTFVTK	0.999995	0.000168837	88.021	0.998706	0.00216605	78.324	0.999995	0.000168837	88.021	3
	KFZ67_01245	43	K	30S ribosomal protein S17 OS=Photobacterium damselae OX=38293 GN=rpsQ PE=3 SV=1	rpsQ	3	-0.22075	13	TTK(1)LHAHDENNECGLGDTVEIR	1	1.36661e-53	148.52	1	1.46469e-44	143.47	1	1.36661e-53	148.52	3
	KFZ67_01245	30	K	30S ribosomal protein S17 OS=Photobacterium damselae OX=38293 GN=rpsQ PE=3 SV=1	rpsQ	2	-0.78528	10	MVK(1)HPIYGK	1	0.00050565	84.615	1	0.0069631	54.722	1	0.00050565	84.615	3
	KFZ67_01215	18	K	50S ribosomal protein L2 OS=Photobacterium damsela subsp. piscicida OX=38294 GN=rplB PE=3 SV=1	rplB	3	-0.93902	4	HVVK(1)VVNSDLHK	1	6.50463e-05	81.92	1	0.000608297	65.179	1	6.50463e-05	81.92	3
	KFZ67_01150	103	K	Peptidyl-prolyl cis-trans isomerase OS=Photobacterium damselae OX=38293 GN=BST98_01135 PE=3 SV=1	BST98_01135	3	-0.1706	5	DVLAGVEDVFADK(1)SR	1	4.042e-17	114.31	1	4.28783e-06	73.296	1	4.042e-17	114.31	3
	KFZ67_01215	26	K	50S ribosomal protein L2 OS=Photobacterium damsela subsp. piscicida OX=38294 GN=rplB PE=3 SV=1	rplB	3	0.022272	7	VVNSDLHK(0.908)GK(0.092)PYAPLLEK	0.907522	1.68151e-06	64.275	0.747882	0.000158514	48.677	0.907522	1.68151e-06	64.275	3
	KFZ67_01210	64	K	50S ribosomal protein L23 OS=Photobacterium damsela subsp. piscicida OX=38294 GN=rplW PE=3 SV=1	rplW	2	0.40994	6	SVNTLIAK(1)GK	1	0.00122465	69.721	1	0.00138224	68.355	1	0.00122465	69.721	3
	KFZ67_01150	55	K	Peptidyl-prolyl cis-trans isomerase OS=Photobacterium damselae OX=38293 GN=BST98_01135 PE=3 SV=1	BST98_01135	2	0.86206	2	ATAVEFK(1)TEDQK	1	6.84563e-37	162.68	1	4.77605e-20	142.97	1	6.84563e-37	162.68	3
	KFZ67_01150	48	K	Peptidyl-prolyl cis-trans isomerase OS=Photobacterium damselae OX=38293 GN=BST98_01135 PE=3 SV=1	BST98_01135	3	2.1277	4	AEQTVSAAAPAEK(1)ATAVEFK	1	9.39756e-05	49.066	1	9.39756e-05	49.066	1	0.00078732	42.908	3
	KFZ67_01175	43	K	30S ribosomal protein S12 OS=Vibrio comitans NBRC 102076 OX=1219078 GN=rpsL PE=3 SV=1	rpsL	2	1.0817	3	VYTTTPK(0.977)K(0.023)PNSALR	0.977168	4.08566e-06	94.09	0.977168	4.08566e-06	94.09	0.971402	6.31646e-06	92.039	3
	KFZ67_01175	30	K	30S ribosomal protein S12 OS=Vibrio comitans NBRC 102076 OX=1219078 GN=rpsL PE=3 SV=1	rpsL	2	0.85705	9	SNVPALEACPQK(1)R	1	4.48035e-23	135.94	1	1.76338e-09	98.942	1	4.48035e-23	135.94	3
	KFZ67_01180	41	K	30S ribosomal protein S7 OS=Photobacterium damselae OX=38293 GN=rpsG PE=3 SV=1	rpsG	3	1.147	4	STAEK(1)IVYTALDTMAER	1	1.94006e-18	119.92	1	1.94006e-18	119.92	1	8.76481e-13	103.01	3
	KFZ67_01180	149	K	30S ribosomal protein S7 OS=Photobacterium damselae OX=38293 GN=rpsG PE=3 SV=1	rpsG	3	0.7434	5	MADANK(1)AFAHYR	1	7.5314e-06	85.813	1	7.5314e-06	85.813	1	2.45711e-05	84.479	3
	KFZ67_01180	131	K	30S ribosomal protein S7 OS=Photobacterium damselae OX=38293 GN=rpsG PE=3 SV=1	rpsG	2	1.089	7	LAAEMLDAADNK(1)GSAVK	1	3.82329e-05	56.817	1	3.82329e-05	56.817	1	4.3834e-05	56.121	3
	KFZ67_01180	11	K	30S ribosomal protein S7 OS=Photobacterium damselae OX=38293 GN=rpsG PE=3 SV=1	rpsG	2	-0.73359	3	K(1)ILPDPK	1	0.0125604	77.923	1	0.0189568	70.525	1	0.0125604	77.923	3
	KFZ67_01180	35	K	30S ribosomal protein S7 OS=Photobacterium damselae OX=38293 GN=rpsG PE=3 SV=1	rpsG	2	-0.96826	11	FVNILMVDGK(1)K	1	1.58639e-13	128.01	1	6.05949e-07	105.46	1	1.58639e-13	128.01	3
	KFZ67_01180	19	K	30S ribosomal protein S7 OS=Photobacterium damselae OX=38293 GN=rpsG PE=3 SV=1	rpsG	2	0.28812	3	FK(1)SELLAK	1	0.000706134	92.051	1	0.00200438	83.647	1	0.000706134	92.051	3
	KFZ67_01180	76	K	30S ribosomal protein S7 OS=Photobacterium damselae OX=38293 GN=rpsG PE=3 SV=1	rpsG	2	-0.16867	3	ALENVRPAVEVK(1)SR	1	8.82821e-17	131.96	1	2.86422e-09	106.42	1	8.82821e-17	131.96	3
	KFZ67_01185	271	K	Elongation factor G OS=Photobacterium damselae OX=38293 GN=fusA PE=3 SV=1	fusA	3	2.1779	3	TLNNEIVVATCGSAFK(1)NK	1	2.21623e-09	75.674	1	0.00012605	48.372	1	2.21623e-09	75.674	3
	KFZ67_03110	51	K	Chaperone protein skp OS=Photobacterium damsela subsp. piscicida OX=38294 GN=BEI67_02920 PE=3 SV=1	BEI67_02920	2	-0.030194	7	YNVQDK(1)LR	1	1.1739e-23	150.4	1	1.85356e-16	137.9	1	1.1739e-23	150.4	3
	KFZ67_01200	38	K	50S ribosomal protein L3 OS=Photobacterium damselae OX=38293 GN=rplC PE=3 SV=1	rplC	3	-0.43283	3	VSQVK(1)TVETDGYNAIQITTGSK	1	8.46612e-28	119.94	1	6.61581e-16	89.47	1	8.46612e-28	119.94	3
	KFZ67_01200	123	K	50S ribosomal protein L3 OS=Photobacterium damselae OX=38293 GN=rplC PE=3 SV=1	rplC	2	0.40472	5	GFQGAVK(1)R	1	3.7664e-07	116.05	1	3.7664e-07	116.05	1	6.08429e-05	104.2	3
	KFZ67_03440	153	K	4-hydroxy-tetrahydrodipicolinate synthase OS=Photobacterium damselae OX=38293 GN=dapA PE=3 SV=1	dapA	2	-1.0287	3	LAK(1)LDNIIGIK	1	0.000328187	74.611	1	0.00475922	50.484	1	0.000328187	74.611	3
	KFZ67_01205	57	K	50S ribosomal protein L4 OS=Photobacterium damselae OX=38293 GN=rplD PE=3 SV=1	rplD	2	-0.96864	2	SDVSGGGAK(1)PWR	1	0.000112683	84.053	1	0.000112683	84.053	1	0.000390059	75.819	3
	KFZ67_01215	150	K	50S ribosomal protein L2 OS=Photobacterium damsela subsp. piscicida OX=38294 GN=rplB PE=3 SV=1	rplB	3	2.3686	7	NIPVGSTVHCVELK(0.002)PGK(0.998)GAQLAR	0.998448	9.26538e-22	104.52	0.997981	9.26538e-22	104.52	0.998448	1.67875e-16	95.195	3
	KFZ67_03080	146	K	Ribosome-recycling factor OS=Photobacterium damselae OX=38293 GN=frr PE=3 SV=1	frr	2	1.3193	3	DK(1)EISEDDDR	1	9.60666e-12	128.01	1	9.37515e-08	116.55	1	9.60666e-12	128.01	3
	KFZ67_03065	132	K	30S ribosomal protein S2 OS=Photobacterium damsela subsp. piscicida OX=38294 GN=rpsB PE=3 SV=1	rpsB	2	-1.2202	2	LTK(1)K(1)EALMR	1	0.0111022	56.432	1	0.0131368	54.982	1	0.0111022	56.432	3
	KFZ67_03080	21	K	Ribosome-recycling factor OS=Photobacterium damselae OX=38293 GN=frr PE=3 SV=1	frr	2	-0.16453	4	SVDALK(1)SQLAK	1	3.187e-13	122.69	1	3.187e-13	122.69	1	6.92879e-10	120.77	3
	KFZ67_02535	358	K	Enolase OS=Photobacterium damselae OX=38293 GN=eno PE=3 SV=1	eno	3	0.29186	3	FNQIGSLTETLAAIK(1)MAK	1	5.20181e-12	93.495	1	5.20181e-12	93.495	1	1.24077e-09	80.049	3
	KFZ67_02535	66	K	Enolase OS=Photobacterium damselae OX=38293 GN=eno PE=3 SV=1	eno	3	0.30804	6	GVLK(1)AVTAVNGPIAEALLGK	1	1.65234e-12	88.176	1	6.02277e-10	74.029	1	1.65234e-12	88.176	3
	KFZ67_02535	62	K	Enolase OS=Photobacterium damselae OX=38293 GN=eno PE=3 SV=1	eno	2	-0.40512	5	FLGK(1)GVLK	1	0.00689487	70.552	1	0.0283621	49.097	1	0.00689487	70.552	3
	KFZ67_02535	263	K	Enolase OS=Photobacterium damselae OX=38293 GN=eno PE=3 SV=1	eno	2	-1.1276	10	EEGIYDLK(1)GEGK	1	5.62616e-07	100.38	1	1.52967e-06	96.82	1	5.62616e-07	100.38	3
	KFZ67_02535	255	K	Enolase OS=Photobacterium damselae OX=38293 GN=eno PE=3 SV=1	eno	3	4.3109	11	DVTLAMDCAASEFYNK(1)EEGIYDLK	1	1.54896e-23	98.3	1	6.03072e-08	71.651	1	1.54896e-23	98.3	3
	KFZ67_02535	85	K	Enolase OS=Photobacterium damselae OX=38293 GN=eno PE=3 SV=1	eno	3	-1.2424	15	DAK(1)DQAAIDQIMIDLDGTENK	1	7.41891e-64	162.73	1	7.41891e-64	162.73	1	2.42034e-53	147.28	3
	KFZ67_02535	427	K	Enolase OS=Photobacterium damselae OX=38293 GN=eno PE=3 SV=1	eno	2	-0.59808	8	APFNGLK(1)EVK	1	0.000183885	89.9	1	0.00111448	70.675	1	0.000183885	89.9	3
	KFZ67_01695	116	K	Lipopolysaccharide export system protein LptA OS=Photobacterium damsela subsp. piscicida OX=38294 GN=lptA PE=3 SV=1	lptA	3	-2.5627	3	YETATEFLK(1)MSDHAVLTQDGSEIK	1	4.08688e-05	51.301	1	4.08688e-05	51.301	1	0.000127118	46.273	3
	KFZ67_01520	74	K	Single-stranded DNA-binding protein OS=Photobacterium damsela subsp. piscicida OX=38294 GN=BEI67_01380 PE=3 SV=1	BEI67_01380	2	0.11472	3	K(1)GSQVYIEGQLQTR	1	2.64743e-10	106.42	1	6.9182e-10	100.43	1	2.64743e-10	106.42	3
	KFZ67_01520	8	K	Single-stranded DNA-binding protein OS=Photobacterium damsela subsp. piscicida OX=38294 GN=BEI67_01380 PE=3 SV=1	BEI67_01380	3	2.536	3	GVNK(1)VILVGNLGNDPEVR	1	1.72453e-28	125.98	1	7.81006e-12	91.317	1	1.72453e-28	125.98	3
	KFZ67_02805	234	K	Outer membrane protein assembly factor BamD OS=Photobacterium damsela subsp. piscicida OX=38294 GN=bamD PE=3 SV=1	bamD	2	1.4113	3	TQK(1)YIDLNPVK	1	0.000462767	72.29	1	0.0007054	69.864	1	0.000462767	72.29	3
	KFZ67_02805	217	K	Outer membrane protein assembly factor BamD OS=Photobacterium damsela subsp. piscicida OX=38294 GN=bamD PE=3 SV=1	bamD	2	-0.11537	3	SLLLEK(1)K	1	0.0109435	80.229	1	0.0109435	80.229	1	0.0240506	66.073	3
	KFZ67_02805	218	K	Outer membrane protein assembly factor BamD OS=Photobacterium damsela subsp. piscicida OX=38294 GN=bamD PE=3 SV=1	bamD	2	-0.67408	4	K(1)AYEK(1)LGMQK	1	0.000193965	82.831	1	0.000193965	82.831	1	0.0010174	65.278	3
	KFZ67_02805	222	K	Outer membrane protein assembly factor BamD OS=Photobacterium damsela subsp. piscicida OX=38294 GN=bamD PE=3 SV=1	bamD	2	-0.67408	10	K(1)AYEK(1)LGMQK	1	5.17204e-06	109.48	1	0.000193965	82.831	1	5.17204e-06	109.48	3
	KFZ67_01330	18	K	50S ribosomal protein L17 OS=Photobacterium damsela subsp. piscicida OX=38294 GN=rplQ PE=3 SV=1	rplQ	2	1.1081	10	K(1)AMFSNMASSLVR	1	1.50333e-31	155.86	1	3.71152e-23	137.84	1	1.50333e-31	155.86	3
	KFZ67_01330	35	K	50S ribosomal protein L17 OS=Photobacterium damsela subsp. piscicida OX=38294 GN=rplQ PE=3 SV=1	rplQ	2	0.069466	5	HELIK(1)TTLPK	1	9.81789e-12	127.87	1	9.81789e-12	127.87	1	8.50553e-08	117.09	3
	KFZ67_01325	304	K	DNA-directed RNA polymerase subunit alpha OS=Photobacterium damselae OX=38293 GN=rpoA PE=3 SV=1	rpoA	2	-0.19272	3	SLTEIK(1)DVLASR	1	2.32968e-14	132.5	1	4.13502e-07	102.97	1	2.32968e-14	132.5	3
	KFZ67_02535	361	K	Enolase OS=Photobacterium damselae OX=38293 GN=eno PE=3 SV=1	eno	3	-0.37269	7	MAK(1)DAGYTAVISHR	1	2.26609e-32	157.86	1	2.95933e-18	133.48	1	2.26609e-32	157.86	3
	KFZ67_01325	271	K	DNA-directed RNA polymerase subunit alpha OS=Photobacterium damselae OX=38293 GN=rpoA PE=3 SV=1	rpoA	3	0.45882	3	SANCLK(1)AEAIHYIGDLVQR	1	4.05719e-10	82.609	1	4.52241e-10	82.265	1	4.05719e-10	82.609	3
	KFZ67_02535	326	K	Enolase OS=Photobacterium damselae OX=38293 GN=eno PE=3 SV=1	eno	3	-0.44436	3	IQLVGDDLFVTNTK(1)ILAEGIEK	1	3.12209e-35	130.89	1	3.12209e-35	130.89	1	2.17598e-21	102.45	3
	KFZ67_02535	120	K	Enolase OS=Photobacterium damselae OX=38293 GN=eno PE=3 SV=1	eno	3	-0.13408	4	SNFGANAILAVSLANAK(1)AAAAAK	1	1.97278e-35	129.2	1	1.97278e-35	129.2	1	1.65142e-27	111.4	3
	KFZ67_19475	35	K	NAD-dependent malic enzyme OS=Photobacterium damselae OX=38293 GN=BST98_15890 PE=3 SV=1	BST98_15890	2	1.7672	3	TLNK(1)STAFTYEER	1	0.000137357	76.759	1	0.000137357	76.759	1	0.0004135	68.044	3
	KFZ67_01580	59	K	MSHA pilin protein MshA OS=Photobacterium leiognathi lrivu.4.1 OX=1248232 GN=PLEI_2587 PE=4 SV=1	PLEI_2587	3	2.1681	3	GAMQGAAGIVYGK(1)SAIQGIENTK	1	6.25853e-11	79.69	1	8.05747e-08	71.651	1	6.25853e-11	79.69	3
	KFZ67_02755	50	K	50S ribosomal protein L19 OS=Photobacterium damselae OX=38293 GN=rplS PE=3 SV=1	rplS	2	0.82017	5	LQAFEGVVIAK(1)R	1	3.20299e-20	143.97	1	1.166e-19	135.99	1	3.20299e-20	143.97	3
	KFZ67_02755	96	K	50S ribosomal protein L19 OS=Photobacterium damselae OX=38293 GN=rplS PE=3 SV=1	rplS	2	-1.9847	3	AK(1)LYYLR	1	0.000559555	103.02	1	0.000559555	103.02	1	0.000559555	103.02	3
	KFZ67_02740	35	K	30S ribosomal protein S16 OS=Photobacterium damselae OX=38293 GN=rpsP PE=3 SV=1	rpsP	2	0.81302	3	SIEK(1)LGFFNPLAK	1	7.91516e-10	105.65	1	3.00132e-06	85.554	1	7.91516e-10	105.65	3
	KFZ67_02740	13	K	30S ribosomal protein S16 OS=Photobacterium damselae OX=38293 GN=rpsP PE=3 SV=1	rpsP	2	0.56638	3	K(1)RPFYHIVVADAR	1	3.69296e-51	173.59	1	3.69296e-51	173.59	1	9.7315e-40	161.87	3
	KFZ67_02595	670	K	Alanine--tRNA ligase OS=Photobacterium damselae OX=38293 GN=alaS PE=3 SV=1	alaS	3	-0.70901	3	VLSMGDFSTELCGGIHAK(1)R	1	3.79403e-29	131.56	1	3.79403e-29	131.56	1	6.79039e-16	103.13	3
	KFZ67_02595	720	K	Alanine--tRNA ligase OS=Photobacterium damselae OX=38293 GN=alaS PE=3 SV=1	alaS	2	-2.9381	3	LVK(1)SDTASVVNK	1	0.000194755	77.124	1	0.0186698	45.183	1	0.000194755	77.124	3
	KFZ67_02595	574	K	Alanine--tRNA ligase OS=Photobacterium damselae OX=38293 GN=alaS PE=3 SV=1	alaS	2	2.0309	3	K(1)LLGEHVAQK	1	0.000227626	85.963	1	0.000227626	85.963	1	0.000268978	84.687	3
	KFZ67_02595	541	K	Alanine--tRNA ligase OS=Photobacterium damselae OX=38293 GN=alaS PE=3 SV=1	alaS	2	1.9739	2	GTLTEGALK(1)VGDK	1	0.00231264	47.774	1	0.00412704	44.44	1	0.00231264	47.774	3
	KFZ67_02595	588	K	Alanine--tRNA ligase OS=Photobacterium damselae OX=38293 GN=alaS PE=3 SV=1	alaS	2	0.78761	4	GSLVK(1)PDSLR	1	0.00064484	77.062	1	0.00074468	74.849	1	0.00064484	77.062	3
	KFZ67_02595	748	K	Alanine--tRNA ligase OS=Photobacterium damselae OX=38293 GN=alaS PE=3 SV=1	alaS	2	0.17194	3	EIQQLK(1)DK	1	0.000629206	92.838	1	0.000629206	92.838	1	0.00311702	80.455	3
	KFZ67_02585	22	K	Protein RecA OS=Photobacterium damselae OX=38293 GN=recA PE=3 SV=1	recA	2	-0.89231	3	QFGK(1)GSIMK	1	0.000559776	87.667	1	0.000559776	87.667	1	0.000942007	83.182	3
	KFZ67_02585	285	K	Protein RecA OS=Photobacterium damselae OX=38293 GN=recA PE=3 SV=1	recA	2	-0.67418	4	LIEK(1)AGAWYSYK	1	6.18548e-05	83.204	1	0.00127949	60.157	1	6.18548e-05	83.204	3
	KFZ67_02585	105	K	Protein RecA OS=Photobacterium damselae OX=38293 GN=recA PE=3 SV=1	recA	3	1.9314	3	K(1)LGVDIDQLLVSQPDTGEQALEICDALAR	1	2.28937e-35	112.39	1	4.29189e-09	61.751	1	2.28937e-35	112.39	3
	KFZ67_02585	27	K	Protein RecA OS=Photobacterium damselae OX=38293 GN=recA PE=3 SV=1	recA	2	-2.7681	6	GSIMK(1)LGDNR	1	8.30231e-05	93.096	1	0.000148335	87.568	1	8.30231e-05	93.096	3
	KFZ67_02535	406	K	Enolase OS=Photobacterium damselae OX=38293 GN=eno PE=3 SV=1	eno	2	-0.2721	5	VAK(1)YNQLIR	1	6.97595e-17	138.54	1	8.41821e-17	136.8	1	6.97595e-17	138.54	3
	KFZ67_02535	312	K	Enolase OS=Photobacterium damselae OX=38293 GN=eno PE=3 SV=1	eno	3	1.3262	5	LLGDK(1)IQLVGDDLFVTNTK	1	2.90195e-22	121.01	1	2.23582e-21	111.6	1	2.90195e-22	121.01	3
	KFZ67_01325	25	K	DNA-directed RNA polymerase subunit alpha OS=Photobacterium damselae OX=38293 GN=rpoA PE=3 SV=1	rpoA	4	1.6285	2	LVDIEQVNSTHAK(1)VTLEPLER	1	1.14738e-05	59.574	1	6.79061e-05	52.09	1	1.14738e-05	59.574	3
	KFZ67_01325	91	K	DNA-directed RNA polymerase subunit alpha OS=Photobacterium damselae OX=38293 GN=rpoA PE=3 SV=1	rpoA	2	0.82848	3	GLAVK(1)VEGK	1	0.00392531	64.191	1	0.00452369	61.161	1	0.00392531	64.191	3
	KFZ67_01320	121	K	30S ribosomal protein S4 OS=Photobacterium damsela subsp. piscicida OX=38294 GN=rpsD PE=3 SV=1	rpsD	3	-1.5286	4	QLVSHK(1)AILVNGQVVNVPSYK	1	2.6546e-44	142.97	1	3.79789e-27	115.42	1	2.6546e-44	142.97	3
	KFZ67_03060	200	K	Methionine aminopeptidase OS=Photobacterium damselae OX=38293 GN=map PE=3 SV=1	map	3	0.13128	2	DYCGHGIGNEFHEEPQVVHYK(1)NNDR	1	3.02767e-07	62.193	1	3.02767e-07	62.193	1	1.67927e-05	56.131	3
	KFZ67_03065	26	K	30S ribosomal protein S2 OS=Photobacterium damsela subsp. piscicida OX=38294 GN=rpsB PE=3 SV=1	rpsB	2	-0.26027	9	YWNPK(1)MK	1	0.0161804	71.379	1	0.0221324	60.788	1	0.0161804	71.379	3
	KFZ67_03065	73	K	30S ribosomal protein S2 OS=Photobacterium damsela subsp. piscicida OX=38294 GN=rpsB PE=3 SV=1	rpsB	2	-0.66318	6	VLFVGTK(1)R	1	5.66912e-17	143.89	1	5.66912e-17	143.89	1	1.02185e-16	141.39	3
	KFZ67_03065	45	K	30S ribosomal protein S2 OS=Photobacterium damsela subsp. piscicida OX=38294 GN=rpsB PE=3 SV=1	rpsB	3	-0.7314	12	VHIINLEK(1)TVPMFNEALAEINK	1	7.0887e-16	88.872	1	1.82948e-10	73.672	1	7.0887e-16	88.872	3
	KFZ67_01245	36	K	30S ribosomal protein S17 OS=Photobacterium damselae OX=38293 GN=rpsQ PE=3 SV=1	rpsQ	2	-0.66316	3	HPIYGK(1)FIK	1	0.00257455	71.03	1	0.00661625	58.433	1	0.00257455	71.03	3
	KFZ67_03065	131	K	30S ribosomal protein S2 OS=Photobacterium damsela subsp. piscicida OX=38294 GN=rpsB PE=3 SV=1	rpsB	2	-1.2202	2	LTK(1)K(1)EALMR	1	0.0111022	56.432	1	0.0131368	54.982	1	0.0111022	56.432	3
	KFZ67_03065	143	K	30S ribosomal protein S2 OS=Photobacterium damsela subsp. piscicida OX=38294 GN=rpsB PE=3 SV=1	rpsB	2	-1.4782	2	EMEK(1)LEK	1	0.0229114	69.198	1	0.0229114	69.198	1	0.0259825	66.799	3
	KFZ67_03065	11	K	30S ribosomal protein S2 OS=Photobacterium damsela subsp. piscicida OX=38294 GN=rpsB PE=3 SV=1	rpsB	3	-0.75638	17	DMLK(1)AGVHFGHQTR	1	3.95587e-10	102.52	1	5.80966e-07	90.707	1	3.95587e-10	102.52	3
	KFZ67_03065	81	K	30S ribosomal protein S2 OS=Photobacterium damsela subsp. piscicida OX=38294 GN=rpsB PE=3 SV=1	rpsB	3	-1.0957	6	AASEAVK(1)EAAINCDQYYVNNR	1	1.28895e-53	152.89	1	1.28895e-53	152.89	1	1.33587e-53	152.66	3
	KFZ67_03070	138	K	Elongation factor Ts OS=Photobacterium damsela subsp. piscicida OX=38294 GN=tsf PE=3 SV=1	tsf	3	0.59501	4	VEYIK(1)GENISTYSHGAR	1	0.000383666	46.892	1	0.000709497	44.734	1	0.000383666	46.892	3
	KFZ67_03070	245	K	Elongation factor Ts OS=Photobacterium damsela subsp. piscicida OX=38294 GN=tsf PE=3 SV=1	tsf	3	0.94453	3	TVGEVLK(1)EAGATVSGFVR	1	7.15679e-36	140.68	1	7.15679e-36	140.68	1	2.05815e-28	124.29	3
	KFZ67_03070	24	K	Elongation factor Ts OS=Photobacterium damsela subsp. piscicida OX=38294 GN=tsf PE=3 SV=1	tsf	2	-2.2038	3	TGAGMMECK(1)K	1	0.00214041	60.641	1	0.00594159	51.998	1	0.00214041	60.641	3
	KFZ67_03070	52	K	Elongation factor Ts OS=Photobacterium damsela subsp. piscicida OX=38294 GN=tsf PE=3 SV=1	tsf	2	0.75057	5	K(1)AGNVAAEGIIIIK	1	7.26157e-14	121.48	1	0.000431237	58.589	1	7.26157e-14	121.48	3
	KFZ67_03070	191	K	Elongation factor Ts OS=Photobacterium damsela subsp. piscicida OX=38294 GN=tsf PE=3 SV=1	tsf	5	0.80341	6	HIAMHVAASRPEYVTPEDVPAEVVAK(1)ER	1	2.44571e-46	125.39	1	2.90677e-13	79.382	1	2.44571e-46	125.39	3
	KFZ67_03070	212	K	Elongation factor Ts OS=Photobacterium damsela subsp. piscicida OX=38294 GN=tsf PE=3 SV=1	tsf	2	3.2691	8	PQAIAEK(1)MVEGR	1	2.53034e-07	68.445	1	2.53034e-07	68.445	1	6.12204e-07	61.612	3
	KFZ67_03075	222	K	Uridylate kinase OS=Photobacterium damselae OX=38293 GN=pyrH PE=3 SV=1	pyrH	2	0.90301	7	VFNMNK(1)PGALR	1	4.46812e-06	94.692	1	4.46812e-06	94.692	1	6.80276e-06	94.692	3
	KFZ67_03075	166	K	Uridylate kinase OS=Photobacterium damselae OX=38293 GN=pyrH PE=3 SV=1	pyrH	2	1.0146	7	ATK(1)VDGVFTADPVK	1	5.16515e-05	78.505	1	0.000151101	70.26	1	5.16515e-05	78.505	3
	KFZ67_02980	407	K	LOG family protein OS=Photobacterium damselae subsp. damselae OX=85581 GN=ppnN PE=4 SV=1	ppnN	2	2.1938	3	EEGIQAIEK(1)YGK	1	0.000275388	73.435	1	0.00216096	55.261	1	0.000275388	73.435	3
	KFZ67_02880	341	K	2,3,4,5-tetrahydropyridine-2,6-dicarboxylate N-succinyltransferase OS=Photobacterium damselae OX=38293 GN=dapD PE=3 SV=1	dapD	2	-0.37051	4	TAIELNSELHK(1)NN	1	1.13412e-11	110.08	1	5.9311e-07	95.417	1	1.13412e-11	110.08	3
	KFZ67_02870	298	K	Glutaminase OS=Photobacterium damselae OX=38293 GN=glsA PE=3 SV=1	glsA	2	0.47754	8	GQLMIK(1)QVAK	1	0.00108223	68.657	1	0.00275616	59.908	1	0.00108223	68.657	3
	KFZ67_02870	286	K	Glutaminase OS=Photobacterium damselae OX=38293 GN=glsA PE=3 SV=1	glsA	2	2.6837	2	LDK(1)YGNSVR	1	0.00166817	77.14	1	0.00166817	77.14	1	0.0038011	64.82	3
	KFZ67_01320	183	K	30S ribosomal protein S4 OS=Photobacterium damsela subsp. piscicida OX=38294 GN=rpsD PE=3 SV=1	rpsD	2	-0.39841	3	MEGTFK(1)R	1	3.60734e-06	113.7	1	3.60734e-06	113.7	1	3.60734e-06	113.7	3
	KFZ67_01320	70	K	30S ribosomal protein S4 OS=Photobacterium damsela subsp. piscicida OX=38294 GN=rpsD PE=3 SV=1	rpsD	2	1.0047	10	IYGVLEK(1)QFR	1	3.53952e-25	155.42	1	3.53952e-25	155.42	1	3.53952e-25	155.42	3
	KFZ67_01320	156	K	30S ribosomal protein S4 OS=Photobacterium damsela subsp. piscicida OX=38294 GN=rpsD PE=3 SV=1	rpsD	3	-0.29059	3	IK(1)AALEVATQR	1	1.35989e-05	87.184	1	0.00302634	52.391	1	1.35989e-05	87.184	3
	KFZ67_01320	176	K	30S ribosomal protein S4 OS=Photobacterium damsela subsp. piscicida OX=38294 GN=rpsD PE=3 SV=1	rpsD	2	-0.21627	3	ELPTWVEVDNK(1)K	1	0.00250001	51.726	1	0.00250001	51.726	1	0.00250001	51.726	3
	KFZ67_01320	136	K	30S ribosomal protein S4 OS=Photobacterium damsela subsp. piscicida OX=38294 GN=rpsD PE=3 SV=1	rpsD	3	2.2872	6	AILVNGQVVNVPSYK(1)VAANDVVSIR	1	2.88037e-16	95.926	1	8.06128e-08	72.935	1	2.88037e-16	95.926	3
	KFZ67_01315	87	K	30S ribosomal protein S11 OS=Aliivibrio finisterrensis OX=511998 GN=rpsK PE=3 SV=1	rpsK	2	0.33507	10	NLEVMVK(1)GPGPGR	1	2.85713e-52	176.18	1	2.85713e-52	176.18	1	7.01405e-41	164.81	3
	KFZ67_01315	57	K	30S ribosomal protein S11 OS=Aliivibrio finisterrensis OX=511998 GN=rpsK PE=3 SV=1	rpsK	2	1.2006	5	K(1)STPFAAQVAAER	1	1.60413e-19	134.68	1	1.60413e-19	134.68	1	5.70071e-17	126.09	3
	KFZ67_01315	14	K	30S ribosomal protein S11 OS=Aliivibrio finisterrensis OX=511998 GN=rpsK PE=3 SV=1	rpsK	3	0.28437	9	K(1)QVADGVAHIHASFNNTIVTITDR	1	6.81801e-63	147.26	1	7.66899e-43	132.84	1	6.81801e-63	147.26	3
	KFZ67_03080	6	K	Ribosome-recycling factor OS=Photobacterium damselae OX=38293 GN=frr PE=3 SV=1	frr	2	0.48188	7	MINEIK(1)QDAK	1	3.70697e-34	161.17	1	1.09275e-07	115.57	1	3.70697e-34	161.17	3
	KFZ67_01315	125	K	30S ribosomal protein S11 OS=Aliivibrio finisterrensis OX=511998 GN=rpsK PE=3 SV=1	rpsK	3	-1.0261	4	ITNIVDATPIPHNGCRPPK(1)K	1	1.55281e-16	106.75	1	2.11085e-11	85.387	1	1.55281e-16	106.75	3
	KFZ67_01310	78	K	30S ribosomal protein S13 OS=Photobacterium damsela subsp. piscicida OX=38294 GN=rpsM PE=3 SV=1	rpsM	2	-0.35376	6	EVSMNIK(1)R	1	1.7819e-07	119.41	1	1.7819e-07	119.41	1	1.85032e-07	119.29	3
	KFZ67_01310	62	K	30S ribosomal protein S13 OS=Photobacterium damsela subsp. piscicida OX=38294 GN=rpsM PE=3 SV=1	rpsM	2	-0.069435	4	DGVAK(1)YTVEGDLR	1	0.000581802	64.104	1	0.000659359	62.287	1	0.000581802	64.104	3
	KFZ67_02800	37	K	Ribosomal subunit interface protein OS=Photobacterium damselae OX=38293 GN=raiA PE=4 SV=1	raiA	2	-3.0994	2	K(1)HVVIGQEPNK	1	1.11811e-08	110.08	1	0.00167947	58.829	1	1.11811e-08	110.08	3
	KFZ67_02865	423	K	Glutamate decarboxylase OS=Photobacterium damselae subsp. damselae OX=85581 GN=gadA PE=3 SV=1	gadA	3	-1.5077	4	ILVK(1)QGFSQDLANLLIK	1	1.39452e-06	71.354	1	9.56032e-06	60.489	1	1.39452e-06	71.354	3
	KFZ67_02865	29	K	Glutamate decarboxylase OS=Photobacterium damselae subsp. damselae OX=85581 GN=gadA PE=3 SV=1	gadA	3	-2.6209	3	K(1)MPQQEQSPQAIYQMIR	1	2.70225e-06	68.481	1	9.05945e-05	52.172	1	2.70225e-06	68.481	3
	KFZ67_02865	28	K	Glutamate decarboxylase OS=Photobacterium damselae subsp. damselae OX=85581 GN=gadA PE=3 SV=1	gadA	3	1.521	5	EQGADPIFGSDALSHIASSK(1)K	1	7.9544e-16	91.276	1	9.90997e-16	89.663	1	7.9544e-16	91.276	3
	KFZ67_02820	530	K	Chaperone protein ClpB OS=Photobacterium damselae OX=38293 GN=clpB PE=3 SV=1	clpB	2	-0.81237	3	NK(1)VTDTEIADVLSK	1	0.000558701	57.288	1	0.000846687	52.372	1	0.000558701	57.288	3
	KFZ67_01290	11	K	50S ribosomal protein L30 OS=Photobacterium angustum OX=661 GN=rpmD PE=3 SV=1	rpmD	2	-0.37036	3	VTQTK(1)SSIGR	1	6.30304e-45	174.46	1	6.30304e-45	174.46	1	9.81738e-25	148.56	3
	KFZ67_01310	27	K	30S ribosomal protein S13 OS=Photobacterium damsela subsp. piscicida OX=38294 GN=rpsM PE=3 SV=1	rpsM	3	-0.73299	3	HAVIALTAIYGIGK(1)TR	1	4.70153e-13	109.07	1	8.06417e-10	97.45	1	4.70153e-13	109.07	3
	KFZ67_01245	19	K	30S ribosomal protein S17 OS=Photobacterium damselae OX=38293 GN=rpsQ PE=3 SV=1	rpsQ	2	-0.083484	9	GDK(1)TIVVAIER	1	1.45984e-06	100.04	1	1.45984e-06	100.04	1	1.45984e-06	100.04	3
	KFZ67_01260	88	K	50S ribosomal protein L5 OS=Photobacterium damselae OX=38293 GN=rplE PE=3 SV=1	rplE	2	-0.76909	3	EGYPIGCK(1)VTLR	1	0.000193426	77.185	1	0.00165015	50.222	1	0.000193426	77.185	3
	KFZ67_01250	59	K	50S ribosomal protein L14 OS=Photobacterium damsela subsp. piscicida OX=38294 GN=rplN PE=3 SV=1	rplN	3	0.4053	3	KGDVLK(1)AVVVR	0.999955	0.000171978	79.889	0.999729	0.000339573	73.632	0.999955	0.000171978	79.889	3
	KFZ67_07015	587	K	Catalase-peroxidase OS=Photobacterium damselae OX=38293 GN=katG PE=3 SV=1	katG	2	-0.98567	3	K(1)FSVSQEELLLDR	1	1.58557e-65	190.85	1	4.57251e-17	127.79	1	1.58557e-65	190.85	3
	KFZ67_07015	385	K	Catalase-peroxidase OS=Photobacterium damselae OX=38293 GN=katG PE=3 SV=1	katG	2	-0.048443	4	FDPAYEK(1)ISR	1	1.09275e-07	115.57	1	1.18768e-05	106.62	1	1.09275e-07	115.57	3
	KFZ67_07265	101	K	RNA chaperone ProQ OS=Photobacterium damselae OX=38293 GN=proQ PE=3 SV=1	proQ	4	0.22042	3	VDLDGNECEALEQEHVEHAQK(1)ALEESK	1	1.74785e-11	73.676	1	6.37414e-06	55.158	1	1.74785e-11	73.676	3
	KFZ67_07265	150	K	RNA chaperone ProQ OS=Photobacterium damselae OX=38293 GN=proQ PE=3 SV=1	proQ	3	-1.389	3	LNK(0.997)K(0.003)PVVETR	0.996773	0.000484821	80.102	0.994725	0.000484821	80.102	0.996773	0.00077655	73.327	3
	KFZ67_07270	274	K	C-terminal processing peptidase OS=Photobacterium damselae OX=38293 GN=BST98_07310 PE=4 SV=1	BST98_07310	2	0.74561	3	SLVAGGPAALSK(1)K	1	0.000622766	69.92	1	0.000622766	61.409	1	0.000622766	69.92	3
	KFZ67_07270	635	K	C-terminal processing peptidase OS=Photobacterium damselae OX=38293 GN=BST98_07310 PE=4 SV=1	BST98_07310	2	0.91056	2	PAFK(1)SLDDVPK	1	0.000338677	74.237	1	0.000503008	71.888	1	0.000338677	74.237	3
	KFZ67_07270	308	K	C-terminal processing peptidase OS=Photobacterium damselae OX=38293 GN=BST98_07310 PE=4 SV=1	BST98_07310	2	-1.4756	3	LDDVVQLIK(1)GPK	1	8.62978e-06	88.021	1	8.62978e-06	88.021	1	0.00016852	78.324	3
	KFZ67_07270	556	K	C-terminal processing peptidase OS=Photobacterium damselae OX=38293 GN=BST98_07310 PE=4 SV=1	BST98_07310	2	-0.29385	2	K(1)IYNFSPVIPK	1	0.00244814	57.175	1	0.00428818	50.354	1	0.00244814	57.175	3
	KFZ67_07270	605	K	C-terminal processing peptidase OS=Photobacterium damselae OX=38293 GN=BST98_07310 PE=4 SV=1	BST98_07310	2	-0.41362	3	DINTISLNEK(1)TR	1	6.41902e-20	141.58	1	9.69313e-14	125.53	1	6.41902e-20	141.58	3
	KFZ67_07270	595	K	C-terminal processing peptidase OS=Photobacterium damselae OX=38293 GN=BST98_07310 PE=4 SV=1	BST98_07310	2	0.29598	3	AEK(1)DINTISLNEK	1	7.6401e-05	80.746	1	0.00161177	51.009	1	7.6401e-05	80.746	3
	KFZ67_07285	48	K	Aminopeptidase N OS=Photobacterium damselae OX=38293 GN=CTM90_19115 PE=4 SV=1	CTM90_19115	2	-0.34949	3	VLAVSQVK(1)R	1	1.25441e-33	168.27	1	5.09811e-25	157.91	1	1.25441e-33	168.27	3
	KFZ67_07285	13	K	Aminopeptidase N OS=Photobacterium damselae OX=38293 GN=CTM90_19115 PE=4 SV=1	CTM90_19115	2	-1.1962	4	SDITNTNQPTAK(1)YR	1	1.38208e-41	168.61	1	5.44918e-32	156.81	1	1.38208e-41	168.61	3
	KFZ67_07320	41	K	DUF3466 domain-containing protein OS=Photobacterium damselae OX=38293 GN=CTM90_19150 PE=4 SV=1	CTM90_19150	3	0.26696	5	VVEVATPDNLDSAK(1)STAYYPNHDR	1	3.70603e-07	63.376	1	0.000325069	46.065	1	3.70603e-07	63.376	3
	KFZ67_07330	122	K	3-hydroxydecanoyl-[acyl-carrier-protein] dehydratase OS=Photobacterium damselae OX=38293 GN=fabA PE=3 SV=1	fabA	2	-0.34485	4	FTGQILPTAK(1)K	1	0.000322766	73.435	1	0.000322766	73.435	1	0.000322766	73.435	3
	KFZ67_07470	5	K	Universal stress protein E OS=Photobacterium damselae OX=38293 GN=uspE PE=4 SV=1	uspE	3	-1.9255	2	YK(1)NILVVADPNQDYQPALVR	1	1.69078e-16	102.69	1	1.61663e-12	88.385	1	1.69078e-16	102.69	3
	KFZ67_07295	274	K	Dihydroorotate dehydrogenase (quinone) OS=Photobacterium damselae OX=38293 GN=pyrD PE=3 SV=1	pyrD	2	1.4069	2	PLQNK(1)STAVIAK	1	2.02109e-20	145.29	1	1.26358e-09	114.87	1	2.02109e-20	145.29	3
	KFZ67_07920	128	K	Uncharacterized protein	--	2	1.3598	7	ASLQK(1)QFDQDEK	1	2.87563e-20	144.57	1	3.40275e-07	104.24	1	2.87563e-20	144.57	3
	KFZ67_07015	142	K	Catalase-peroxidase OS=Photobacterium damselae OX=38293 GN=katG PE=3 SV=1	katG	2	0.38702	3	LIWPIK(1)QK	1	0.00430093	77.058	1	0.00430093	77.058	1	0.00430093	77.058	3
	KFZ67_09615	347	K	Cytochrome bd-I ubiquinol oxidase subunit CydA OS=Photobacterium damselae OX=38293 GN=cydA PE=3 SV=1	cydA	2	0.30726	3	SPENIAAFDK(1)VK	1	1.14536e-09	115.57	1	0.000164041	78.529	1	1.14536e-09	115.57	3
	KFZ67_07015	452	K	Catalase-peroxidase OS=Photobacterium damselae OX=38293 GN=katG PE=3 SV=1	katG	2	1.0753	3	LK(1)QEIAASGLSVR	1	1.3795e-12	115.24	1	1.66491e-09	100.69	1	1.3795e-12	115.24	3
	KFZ67_06690	149	K	Phage shock protein A OS=Photobacterium marinum OX=1056511 GN=C942_00575 PE=4 SV=1	C942_00575	2	0.17937	4	ANDVVQK(1)AQSSVSAAK	1	3.04299e-06	74.428	1	8.65909e-06	69.805	1	3.04299e-06	74.428	3
	KFZ67_19420	922	K	Glycine dehydrogenase (decarboxylating) OS=Photobacterium damselae subsp. damselae OX=85581 GN=gcvP PE=3 SV=1	gcvP	2	1.3758	2	ELACFPAK(1)HSR	1	0.000257698	77.124	1	0.000257698	77.124	1	0.00492508	49.934	3
	KFZ67_19430	85	K	Aminomethyltransferase OS=Photobacterium damselae subsp. damselae OX=85581 GN=gcvT PE=3 SV=1	gcvT	3	-0.027891	4	LVPVDIIDLPVGK(1)QR	1	1.06058e-05	69.92	1	1.06058e-05	69.92	1	0.000752723	46.318	3
	KFZ67_10980	132	K	Na(+)-translocating NADH-quinone reductase subunit C OS=Photobacterium damsela subsp. piscicida OX=38294 GN=nqrC PE=3 SV=1	nqrC	2	0.59224	3	VYLVK(1)DAAGK	1	0.000420876	82.029	1	0.000790115	73.841	1	0.000420876	82.029	3
	KFZ67_10980	109	K	Na(+)-translocating NADH-quinone reductase subunit C OS=Photobacterium damsela subsp. piscicida OX=38294 GN=nqrC PE=3 SV=1	nqrC	2	-0.22093	3	QSIK(1)LSPEQDFAK	1	7.98031e-17	123.92	1	4.79825e-13	119.92	1	7.98031e-17	123.92	3
	KFZ67_18935	219	K	Paraslipin OS=Photobacterium damselae OX=38293 GN=BST98_15785 PE=4 SV=1	BST98_15785	2	-0.027654	2	AEGEK(1)QAAILQAEAR	1	1.26221e-05	79.652	1	2.06009e-05	67.646	1	1.26221e-05	79.652	3
	KFZ67_09895	552	K	Arginine--tRNA ligase OS=Photobacterium damselae OX=38293 GN=argS PE=3 SV=1	argS	3	0.56983	3	LK(1)LAHLTAK	1	0.000245149	92.445	1	0.00046714	85.807	1	0.000245149	92.445	3
	KFZ67_09895	559	K	Arginine--tRNA ligase OS=Photobacterium damselae OX=38293 GN=argS PE=3 SV=1	argS	2	-0.52914	3	LAHLTAK(1)TIK	1	2.28816e-05	103.31	1	0.00204179	58.132	1	2.28816e-05	103.31	3
	KFZ67_07825	216	K	PBP superfamily domain OS=Photobacterium damselae OX=38293 GN=BST98_07845 PE=4 SV=1	BST98_07845	3	-1.1034	2	LHLGIMVQGDK(1)R	1	0.000281064	70.942	1	0.00161522	53.211	1	0.000281064	70.942	3
	KFZ67_07825	154	K	PBP superfamily domain OS=Photobacterium damselae OX=38293 GN=BST98_07845 PE=4 SV=1	BST98_07845	2	-1.6592	2	K(1)ELNLWAQAK	1	4.74586e-07	92.866	1	0.000284154	84.31	1	4.74586e-07	92.866	3
	KFZ67_09840	163	K	Site-determining protein OS=Photobacterium damselae subsp. damselae OX=85581 GN=CAY62_04270 PE=3 SV=1	CAY62_04270	2	0.29905	6	ILGILDSK(1)SR	1	1.11469e-17	142.83	1	4.61492e-08	119.53	1	1.11469e-17	142.83	3
	KFZ67_09840	11	K	Site-determining protein OS=Photobacterium damselae subsp. damselae OX=85581 GN=CAY62_04270 PE=3 SV=1	CAY62_04270	2	1.6458	2	IIVVTSGK(1)GGVGK	1	2.05491e-06	89.43	1	0.000130855	77.185	1	2.05491e-06	89.43	3
	KFZ67_05350	319	K	Dipeptidase OS=Photobacterium damselae OX=38293 GN=CTM90_10315 PE=3 SV=1	CTM90_10315	3	0.66717	3	VLSSTYAGTELEQK(1)GERPIR	1	1.87425e-16	103.88	1	1.06267e-07	72.359	1	1.87425e-16	103.88	3
	KFZ67_05350	422	K	Dipeptidase OS=Photobacterium damselae OX=38293 GN=CTM90_10315 PE=3 SV=1	CTM90_10315	3	-2.3851	2	LYK(1)QVSALDNVLQQTYK	1	5.66475e-13	105.53	1	6.24887e-07	74.147	1	5.66475e-13	105.53	3
	KFZ67_05245	48	K	DUF945 domain-containing protein OS=Photobacterium damselae OX=38293 GN=CTM90_10170 PE=4 SV=1	CTM90_10170	2	-0.98162	3	SPYLTITNEK(1)YDR	1	0.000137357	76.759	1	0.000333403	69.92	1	0.000137357	76.759	3
	KFZ67_05245	38	K	DUF945 domain-containing protein OS=Photobacterium damselae OX=38293 GN=CTM90_10170 PE=4 SV=1	CTM90_10170	2	2.8658	3	NK(1)SPYLTITNEK	1	8.56507e-06	88.101	1	2.49473e-05	84.892	1	8.56507e-06	88.101	3
	KFZ67_06130	104	K	Penicillin-binding protein activator LpoB OS=Photobacterium damsela subsp. piscicida OX=38294 GN=lpoB PE=4 SV=1	lpoB	3	0.36911	3	ITSGAEPVLFVSSMQNK(1)TTSHVNSK	1	9.05323e-24	100.62	1	4.44976e-17	95.153	1	9.05323e-24	100.62	3
	KFZ67_06230	165	K	OMP_b-brl domain-containing protein OS=Photobacterium sp. SKA34 OX=121723 GN=SKA34_15633 PE=4 SV=1	SKA34_15633	3	0.68379	10	AK(1)DSLTNIVFGTR	1	3.52245e-52	174.39	1	8.20262e-42	170.79	1	3.52245e-52	174.39	3
	KFZ67_06920	469	K	YjjI family glycine radical enzyme OS=Photobacterium damselae OX=38293 GN=BST98_06940 PE=4 SV=1	BST98_06940	2	2.6147	2	LSDIAK(1)YEEQGSR	1	0.000500626	66.004	1	0.000500626	66.004	1	0.00126184	54.898	3
	KFZ67_01250	23	K	50S ribosomal protein L14 OS=Photobacterium damsela subsp. piscicida OX=38294 GN=rplN PE=3 SV=1	rplN	3	-1.0346	4	SVMCIK(1)VLGGSHR	1	3.92439e-05	81.803	1	0.000673816	57.425	1	3.92439e-05	81.803	3
	KFZ67_09615	350	K	Cytochrome bd-I ubiquinol oxidase subunit CydA OS=Photobacterium damselae OX=38293 GN=cydA PE=3 SV=1	cydA	3	1.4861	4	K(0.999)DLGYGLLLK(0.001)PYAPNVVDATEADIQK	0.998531	4.92898e-06	59.372	0.998531	7.91137e-06	58.349	0.998529	4.92898e-06	59.372	3
	KFZ67_09820	6	K	DNA-binding protein OS=Photobacterium damselae OX=38293 GN=hns_1 PE=3 SV=1	hns_1	2	-0.29121	3	SDAMK(1)ALLNLR	1	0.000109226	82.417	1	0.000588756	71.03	1	0.000109226	82.417	3
	KFZ67_09660	55	K	Probable transcriptional regulatory protein CTM90_05245 OS=Photobacterium damselae OX=38293 GN=CTM90_05245 PE=3 SV=1	CTM90_05245	2	0.83241	5	AAIDK(1)ALSNNMTR	1	1.27526e-09	102.9	1	1.27526e-09	102.9	1	3.17924e-06	85.536	3
	KFZ67_09685	88	K	ATP-dependent zinc protease OS=Photobacterium damsela subsp. piscicida OX=38294 GN=E4T26_03710 PE=4 SV=1	E4T26_03710	2	0.92948	3	LIVEK(1)QIVR	1	0.000227714	94.85	1	0.000769858	84.615	1	0.000227714	94.85	3
	KFZ67_09685	247	K	ATP-dependent zinc protease OS=Photobacterium damsela subsp. piscicida OX=38294 GN=E4T26_03710 PE=4 SV=1	E4T26_03710	2	-0.42972	3	DIALVDVGK(1)K	1	0.00494723	54.259	1	0.00539664	53.237	1	0.00494723	54.259	3
	KFZ67_09575	378	K	Tol-Pal system protein TolB OS=Photobacterium damsela subsp. piscicida OX=38294 GN=tolB PE=3 SV=1	tolB	2	0.66612	2	SDTGYNIAK(1)QDLK	1	0.000247416	71.933	1	0.000247416	71.933	1	0.00566116	41.621	3
	KFZ67_09570	107	K	Peptidoglycan-associated protein OS=Photobacterium damselae OX=38293 GN=pal PE=3 SV=1	pal	3	-0.029186	8	DHPAVK(1)VIIEGHADER	1	2.19405e-22	125.98	1	5.47879e-07	82.877	1	2.19405e-22	125.98	3
	KFZ67_05200	13	K	Peptidoglycan-binding protein LysM OS=Photobacterium damselae subsp. damselae OX=85581 GN=CAY62_08885 PE=4 SV=1	CAY62_08885	2	-1.312	5	K(1)LFSNEDEAPAK	1	1.81141e-09	110.31	1	1.81141e-09	110.31	1	5.02792e-07	100.38	3
	KFZ67_05200	106	K	Peptidoglycan-binding protein LysM OS=Photobacterium damselae subsp. damselae OX=85581 GN=CAY62_08885 PE=4 SV=1	CAY62_08885	2	-2.6529	3	IAEK(1)TLGNGAK	1	1.07221e-19	143.4	1	9.87763e-07	103.31	1	1.07221e-19	143.4	3
	KFZ67_09505	10	K	Acetyl-CoA C-acetyltransferase OS=Photobacterium damselae OX=38293 GN=CTM90_05090 PE=3 SV=1	CTM90_05090	2	0.69125	6	VFIVAAK(1)R	1	7.27634e-17	143	1	3.68027e-11	128.57	1	7.27634e-17	143	3
	KFZ67_09505	345	K	Acetyl-CoA C-acetyltransferase OS=Photobacterium damselae OX=38293 GN=CTM90_05090 PE=3 SV=1	CTM90_05090	4	1.9422	4	HQVEASDIIAK(1)ANLNGGAIALGHPLGASGNR	1	4.73063e-14	82.91	1	1.28533e-13	78.383	1	4.73063e-14	82.91	3
	KFZ67_09505	28	K	Acetyl-CoA C-acetyltransferase OS=Photobacterium damselae OX=38293 GN=CTM90_05090 PE=3 SV=1	CTM90_05090	2	-0.19634	3	DQAAGK(1)IAAEVIK	1	0.00072526	60.861	1	0.000903038	58.885	1	0.00072526	60.861	3
	KFZ67_09210	3	K	DNA topoisomerase 1 OS=Photobacterium damselae subsp. damselae OX=85581 GN=topA PE=3 SV=1	topA	2	2.3668	3	GK(1)SLVIVESPAK	1	0.000632871	68.171	1	0.000715088	66.989	1	0.000632871	68.171	3
	KFZ67_09210	28	K	DNA topoisomerase 1 OS=Photobacterium damselae subsp. damselae OX=85581 GN=topA PE=3 SV=1	topA	3	-1.7334	3	DFIVK(1)SSVGHVR	1	0.000140884	77.124	1	0.000497356	67.385	1	0.000140884	77.124	3
	KFZ67_09210	55	K	DNA topoisomerase 1 OS=Photobacterium damselae subsp. damselae OX=85581 GN=topA PE=3 SV=1	topA	2	2.8387	2	APATSTK(1)GLSAEEK	1	0.000367668	60.55	1	0.000367668	60.55	1	0.000465172	58.885	3
	KFZ67_09170	116	K	META domain-containing protein OS=Photobacterium damselae OX=38293 GN=BST98_09170 PE=4 SV=1	BST98_09170	2	2.0349	3	YDANK(1)LAEK	1	0.000459948	89.827	1	0.005068	60.342	1	0.000459948	89.827	3
	KFZ67_09170	247	K	META domain-containing protein OS=Photobacterium damselae OX=38293 GN=BST98_09170 PE=4 SV=1	BST98_09170	2	1.5762	3	MCVK(1)GMEQEGTYLK	1	0.000222743	61.167	1	0.000572765	51.939	1	0.000222743	61.167	3
	KFZ67_09170	202	K	META domain-containing protein OS=Photobacterium damselae OX=38293 GN=BST98_09170 PE=4 SV=1	BST98_09170	3	-0.42757	4	EAQLGAGDK(1)ELFVQFNDDGLK	1	1.10647e-10	80.109	1	1.10647e-10	80.109	1	1.45883e-10	78.378	3
	KFZ67_09170	275	K	META domain-containing protein OS=Photobacterium damselae OX=38293 GN=BST98_09170 PE=4 SV=1	BST98_09170	3	2.1724	11	AINEMASYSVTGETLTVK(1)NNK	1	3.67146e-27	114.9	1	3.67146e-27	114.9	1	3.78893e-22	109.28	3
	KFZ67_09660	216	K	Probable transcriptional regulatory protein CTM90_05245 OS=Photobacterium damselae OX=38293 GN=CTM90_05245 PE=3 SV=1	CTM90_05245	2	-0.68072	2	ADLDITTAPK(1)LMR	1	0.00306715	46.387	1	0.0058756	41.227	1	0.00306715	46.387	3
	KFZ67_09820	95	K	DNA-binding protein OS=Photobacterium damselae OX=38293 GN=hns_1 PE=3 SV=1	hns_1	2	-1.7284	5	YK(1)FIDENGEEK	1	1.4768e-09	118.9	1	2.05085e-05	86.114	1	1.4768e-09	118.9	3
	KFZ67_09665	315	K	Aspartate--tRNA ligase OS=Photobacterium damselae subsp. damselae OX=85581 GN=aspS PE=3 SV=1	aspS	2	-0.57051	3	VFSAPANDEK(1)GR	1	6.93175e-07	98.105	1	4.0756e-05	84.169	1	6.93175e-07	98.105	3
	KFZ67_09160	658	K	Arginine decarboxylase OS=Photobacterium damselae OX=38293 GN=CTM90_04820 PE=4 SV=1	CTM90_04820	3	3.8509	9	DHVPSEK(1)LNAAYSTLPEAVVTPR	1	2.22704e-36	134.09	1	2.92222e-35	126.55	1	2.22704e-36	134.09	3
	KFZ67_09820	81	K	DNA-binding protein OS=Photobacterium damselae OX=38293 GN=hns_1 PE=3 SV=1	hns_1	3	0.67717	6	EMLLADGIDPEELLASLSK(1)APK	1	6.36539e-35	126.91	1	6.65423e-22	107.78	1	6.36539e-35	126.91	3
	KFZ67_09820	50	K	DNA-binding protein OS=Photobacterium damselae OX=38293 GN=hns_1 PE=3 SV=1	hns_1	2	1.7624	3	EESEAEEIAK(1)ENER	1	1.45219e-23	139.86	1	1.45219e-23	139.86	1	9.12899e-13	111.83	3
	KFZ67_09740	62	K	Peptidyl-prolyl cis-trans isomerase OS=Photobacterium damsela subsp. piscicida OX=38294 GN=BEI67_09415 PE=3 SV=1	BEI67_09415	3	-0.64115	5	VIDGFMIQGGGMTSGMQEK(1)ETHAPIK	1	1.55986e-05	53.998	1	1.55986e-05	53.998	1	5.42605e-05	47.331	3
	KFZ67_09725	170	K	Glycerophosphodiester phosphodiesterase OS=Photobacterium damselae OX=38293 GN=CTM90_05310 PE=4 SV=1	CTM90_05310	3	0.39583	3	TLGYDIGLYPEIK(1)APWFHR	1	2.28411e-29	132.64	1	2.23454e-16	107.62	1	2.28411e-29	132.64	3
	KFZ67_09725	288	K	Glycerophosphodiester phosphodiesterase OS=Photobacterium damselae OX=38293 GN=CTM90_05310 PE=4 SV=1	CTM90_05310	2	-0.4818	7	STK(1)DNIQLTGLVK	1	0.000188925	73.386	1	0.000733963	60.764	1	0.000188925	73.386	3
	KFZ67_09725	198	K	Glycerophosphodiester phosphodiesterase OS=Photobacterium damselae OX=38293 GN=CTM90_05310 PE=4 SV=1	CTM90_05310	2	0.98218	4	QYGYTNK(1)DSK	1	1.43255e-07	113.44	1	1.43255e-07	113.44	1	4.1875e-06	108.93	3
	KFZ67_09725	298	K	Glycerophosphodiester phosphodiesterase OS=Photobacterium damselae OX=38293 GN=CTM90_05310 PE=4 SV=1	CTM90_05310	4	-1.7295	6	DNIQLTGLVK(1)AAHENGMVVHPYTFR	1	2.19051e-24	107.88	1	2.40925e-24	107.65	1	2.19051e-24	107.88	3
	KFZ67_09725	191	K	Glycerophosphodiester phosphodiesterase OS=Photobacterium damselae OX=38293 GN=CTM90_05310 PE=4 SV=1	CTM90_05310	2	0.35301	3	VLK(1)QYGYTNK	1	3.05885e-17	135.55	1	1.46448e-08	121.5	1	3.05885e-17	135.55	3
	KFZ67_09725	188	K	Glycerophosphodiester phosphodiesterase OS=Photobacterium damselae OX=38293 GN=CTM90_05310 PE=4 SV=1	CTM90_05310	2	1.3578	5	AVLK(1)VLK	1	0.020716	70.912	1	0.020716	70.912	1	0.020716	70.912	3
	KFZ67_09160	651	K	Arginine decarboxylase OS=Photobacterium damselae OX=38293 GN=CTM90_04820 PE=4 SV=1	CTM90_04820	2	-0.94585	3	YLK(1)DHVPSEK	1	1.58406e-11	123.67	1	1.17134e-05	106.67	1	1.58406e-11	123.67	3
	KFZ67_09160	177	K	Arginine decarboxylase OS=Photobacterium damselae OX=38293 GN=CTM90_04820 PE=4 SV=1	CTM90_04820	3	-0.79197	8	YDDVHEYSWAAPGHQGGVGFTK(1)TPAGQR	1	4.43159e-26	99.219	1	6.73019e-19	91.767	1	4.43159e-26	99.219	3
	KFZ67_09160	8	K	Arginine decarboxylase OS=Photobacterium damselae OX=38293 GN=CTM90_04820 PE=4 SV=1	CTM90_04820	2	0.50943	4	QK(1)HVLIFNDNLK	1	7.03555e-20	141.06	1	1.3256e-19	135.81	1	7.03555e-20	141.06	3
	KFZ67_09160	611	K	Arginine decarboxylase OS=Photobacterium damselae OX=38293 GN=CTM90_04820 PE=4 SV=1	CTM90_04820	2	-2.2269	3	K(1)HYDNNTPLK	1	2.39754e-17	136.96	1	0.000488906	79.23	1	2.39754e-17	136.96	3
	KFZ67_09160	18	K	Arginine decarboxylase OS=Photobacterium damselae OX=38293 GN=CTM90_04820 PE=4 SV=1	CTM90_04820	3	-1.2068	8	HVLIFNDNLK(1)TGVIENALHR	1	1.23679e-80	190.55	1	1.23679e-80	190.55	1	6.15013e-67	173.87	3
	KFZ67_09160	411	K	Arginine decarboxylase OS=Photobacterium damselae OX=38293 GN=CTM90_04820 PE=4 SV=1	CTM90_04820	2	-1.0106	4	HGK(1)DSIDFQR	1	3.52953e-12	132.25	1	0.000207345	88.596	1	3.52953e-12	132.25	3
	KFZ67_09160	85	K	Arginine decarboxylase OS=Photobacterium damselae OX=38293 GN=CTM90_04820 PE=4 SV=1	CTM90_04820	2	0.0082051	4	FFQLIDK(1)LNR	1	4.30749e-34	163.64	1	4.30749e-34	163.64	1	1.48815e-25	157.66	3
	KFZ67_09160	645	K	Arginine decarboxylase OS=Photobacterium damselae OX=38293 GN=CTM90_04820 PE=4 SV=1	CTM90_04820	2	-0.13586	3	DLGDK(1)MFK	1	0.027478	49.715	1	0.0556886	40.352	1	0.027478	49.715	3
	KFZ67_09160	338	K	Arginine decarboxylase OS=Photobacterium damselae OX=38293 GN=CTM90_04820 PE=4 SV=1	CTM90_04820	3	0.10656	3	DHADQAATYAVITNCTYDGLCYNAK(1)R	1	5.50178e-75	159.98	1	5.50178e-75	159.98	1	5.50178e-75	159.98	3
	KFZ67_19420	303	K	Glycine dehydrogenase (decarboxylating) OS=Photobacterium damselae subsp. damselae OX=85581 GN=gcvP PE=3 SV=1	gcvP	2	1.2073	6	VIGVSK(1)DSQGNQALR	1	3.70617e-37	156.81	1	3.70617e-37	156.81	1	1.09313e-28	142.38	3
	KFZ67_19420	789	K	Glycine dehydrogenase (decarboxylating) OS=Photobacterium damselae subsp. damselae OX=85581 GN=gcvP PE=3 SV=1	gcvP	2	0.69461	3	LAILNANYVK(1)AK	1	0.00126184	60.255	1	0.00275197	51.979	1	0.00126184	60.255	3
	KFZ67_19315	284	K	TPR_REGION domain-containing protein OS=Photobacterium damselae subsp. damselae OX=85581 GN=EQ875_01078 PE=4 SV=1	EQ875_01078	4	0.49172	3	HK(1)IEHATIISSASHVR	1	3.52426e-12	102.39	1	4.50874e-12	100.23	1	3.52426e-12	102.39	3
	KFZ67_03360	7	K	Uracil phosphoribosyltransferase OS=Photobacterium damsela subsp. piscicida OX=38294 GN=upp PE=3 SV=1	upp	3	0.77009	2	VVEVK(1)HPLVK	1	0.00394772	54.419	1	0.00394772	54.419	1	0.00485431	51.872	3
	KFZ67_01735	77	K	Putative phospholipid-binding protein MlaC OS=Photobacterium damselae subsp. damselae OX=85581 GN=mlaC PE=4 SV=1	mlaC	2	0.64517	3	YAAYK(1)VLGSNLK	1	4.4778e-10	119.74	1	4.10928e-06	93.623	1	4.4778e-10	119.74	3
	KFZ67_01735	84	K	Putative phospholipid-binding protein MlaC OS=Photobacterium damselae subsp. damselae OX=85581 GN=mlaC PE=4 SV=1	mlaC	2	0.96465	3	VLGSNLK(1)NTTK	1	1.29682e-13	129.82	1	2.38362e-13	125.72	1	1.29682e-13	129.82	3
	KFZ67_03870	255	K	Co-chaperone YbbN OS=Photobacterium damselae OX=38293 GN=ybbN PE=4 SV=1	ybbN	2	0.94343	3	DLNFADGQAK(1)K	1	0.000951777	66.267	1	0.000951777	66.267	1	0.00595915	47.712	3
	KFZ67_13720	85	K	50S ribosomal protein L7/L12 OS=Photobacterium damsela subsp. piscicida OX=38294 GN=rplL PE=3 SV=1	rplL	2	1.1914	9	EAK(1)AVVDGAPAPLK	1	8.08826e-10	99.991	1	7.81808e-05	74.789	1	8.08826e-10	99.991	3
	KFZ67_13720	101	K	50S ribosomal protein L7/L12 OS=Photobacterium damsela subsp. piscicida OX=38294 GN=rplL PE=3 SV=1	rplL	2	2.4733	2	EGVEK(1)AEAEALK	1	0.00182875	57.106	1	0.00728893	44.406	1	0.00182875	57.106	3
	KFZ67_13720	96	K	50S ribosomal protein L7/L12 OS=Photobacterium damsela subsp. piscicida OX=38294 GN=rplL PE=3 SV=1	rplL	2	0.94907	3	AVVDGAPAPLK(1)EGVEK	1	3.12079e-06	74.141	1	1.93944e-05	62.813	1	3.12079e-06	74.141	3
	KFZ67_14515	103	K	Protein YceI OS=Photobacterium damselae subsp. damselae OX=85581 GN=yceI PE=3 SV=1	yceI	2	-0.84434	6	YPQAK(1)FVSTK	1	0.000189992	89.561	1	0.000189992	89.561	1	0.000650938	76.927	3
	KFZ67_14465	121	K	Linear amide C-N hydrolase OS=Photobacterium damselae OX=38293 GN=CTM90_08420 PE=4 SV=1	CTM90_08420	2	1.8423	3	FAELTDENK(1)SK	1	0.000583335	71.085	1	0.00273943	57.175	1	0.000583335	71.085	3
	KFZ67_14235	261	K	Outer membrane protein II OS=Photobacterium damselae OX=38293 GN=ompA_3 PE=3 SV=1	ompA_3	3	-0.19209	7	LQEQDAAQIYVVGYTDSK(1)GSEAYNQK	1	2.1522e-65	159.2	1	7.34442e-24	98.067	1	2.1522e-65	159.2	3
	KFZ67_14235	269	K	Outer membrane protein II OS=Photobacterium damselae OX=38293 GN=ompA_3 PE=3 SV=1	ompA_3	2	-0.42848	5	GSEAYNQK(1)LSER	1	7.40751e-75	202.05	1	3.95575e-48	176.18	1	7.40751e-75	202.05	3
	KFZ67_14235	135	K	Outer membrane protein II OS=Photobacterium damselae OX=38293 GN=ompA_3 PE=3 SV=1	ompA_3	2	-0.28772	3	GFGAEK(1)YK	1	0.00791256	68.383	1	0.00791256	68.383	1	0.0121497	60.436	3
	KFZ67_14235	91	K	Outer membrane protein II OS=Photobacterium damselae OX=38293 GN=ompA_3 PE=3 SV=1	ompA_3	2	-0.52505	3	AEFNNDYK(1)MR	1	4.84206e-08	119.39	1	1.72226e-07	111.63	1	4.84206e-08	119.39	3
	KFZ67_14160	159	K	Amino acid ABC transporter substrate-binding protein OS=Photobacterium damselae OX=38293 GN=BST98_14705 PE=3 SV=1	BST98_14705	3	1.1391	7	QLPNADQINIK(1)TYDTGIEHDVALGR	1	5.07577e-43	132.86	1	5.07577e-43	132.86	1	9.26886e-43	131.33	3
	KFZ67_14160	189	K	Amino acid ABC transporter substrate-binding protein OS=Photobacterium damselae OX=38293 GN=BST98_14705 PE=3 SV=1	BST98_14705	2	-0.32142	3	LSSLEVIK(1)K	1	7.58688e-06	109.02	1	0.000103208	97.277	1	7.58688e-06	109.02	3
	KFZ67_14130	91	K	Membrane protein insertase YidC OS=Photobacterium damselae OX=38293 GN=yidC PE=3 SV=1	yidC	2	0.35802	3	LLK(1)YNNTLGSK	1	7.25127e-07	105.13	1	7.25127e-07	105.13	1	8.95492e-06	93.345	3
	KFZ67_14130	206	K	Membrane protein insertase YidC OS=Photobacterium damselae OX=38293 GN=yidC PE=3 SV=1	yidC	3	-1.6298	6	HSLVASK(1)SSLTMPTYQGGAYSSVDTNYK	1	1.76334e-26	105.79	1	8.24912e-19	90.397	1	1.76334e-26	105.79	3
	KFZ67_01275	85	K	50S ribosomal protein L6 OS=Photobacterium damselae OX=38293 GN=rplF PE=3 SV=1	rplF	3	0.67727	8	ALVNNMVVGVTEGFTK(1)K	1	2.95797e-29	136.81	1	4.46535e-07	76.341	1	2.95797e-29	136.81	3
	KFZ67_19420	928	K	Glycine dehydrogenase (decarboxylating) OS=Photobacterium damselae subsp. damselae OX=85581 GN=gcvP PE=3 SV=1	gcvP	2	3.2582	4	YSK(1)YWPTVNR	1	0.000300981	84.687	1	0.00108372	70.942	1	0.000300981	84.687	3
	KFZ67_01275	60	K	50S ribosomal protein L6 OS=Photobacterium damselae OX=38293 GN=rplF PE=3 SV=1	rplF	2	-1.7984	6	EGFEK(1)AWAQAGTAR	1	2.41727e-13	119.62	1	2.41727e-13	119.62	1	8.21302e-10	99.834	3
	KFZ67_01275	90	K	50S ribosomal protein L6 OS=Photobacterium damselae OX=38293 GN=rplF PE=3 SV=1	rplF	2	0.399	3	LTLK(1)GVGYR	1	1.98542e-24	154.49	1	5.00571e-24	147.19	1	1.98542e-24	154.49	3
	KFZ67_01250	114	K	50S ribosomal protein L14 OS=Photobacterium damsela subsp. piscicida OX=38294 GN=rplN PE=3 SV=1	rplN	2	1.1369	5	FMK(1)IVSLAPEVL	1	0.00198431	50.484	1	0.00198431	50.484	1	0.00714312	44.564	3
	KFZ67_01255	33	K	50S ribosomal protein L24 OS=Photobacterium damselae OX=38293 GN=rplX PE=3 SV=1	rplX	3	1.3329	6	VLATGK(1)VIVDGINLVK	1	9.77098e-05	55.755	1	9.77098e-05	55.755	1	9.77098e-05	55.755	3
	KFZ67_01255	43	K	50S ribosomal protein L24 OS=Photobacterium damselae OX=38293 GN=rplX PE=3 SV=1	rplX	2	-0.95403	9	VIVDGINLVK(1)K	1	1.08556e-09	119.53	1	1.15985e-05	90.827	1	1.08556e-09	119.53	3
	KFZ67_01255	17	K	50S ribosomal protein L24 OS=Photobacterium damselae OX=38293 GN=rplX PE=3 SV=1	rplX	2	0.5136	3	RNDEVIVLTGK(1)DK	1	1.87051e-51	178.67	1	1.87051e-51	178.67	1	4.94491e-40	166.64	3
	KFZ67_01255	44	K	50S ribosomal protein L24 OS=Photobacterium damselae OX=38293 GN=rplX PE=3 SV=1	rplX	4	0.51874	5	K(0.989)HQK(0.011)PVPAMGIQGGIVEK	0.989431	7.57226e-08	72.433	0.962351	1.49665e-07	71.601	0.989431	7.57226e-08	72.433	3
	KFZ67_01255	61	K	50S ribosomal protein L24 OS=Photobacterium damselae OX=38293 GN=rplX PE=3 SV=1	rplX	4	-2.7789	6	HQKPVPAMGIQGGIVEK(1)EAAIDASNVAIVNGEGK	0.999999	1.6486e-30	106.44	0.990318	6.70985e-06	44.708	0.999999	1.6486e-30	106.44	3
	KFZ67_01255	78	K	50S ribosomal protein L24 OS=Photobacterium damselae OX=38293 GN=rplX PE=3 SV=1	rplX	3	0.77206	3	EAAIDASNVAIVNGEGK(1)ADR	1	3.98865e-45	153.23	1	0.00414302	40.137	1	3.98865e-45	153.23	3
	KFZ67_01260	64	K	50S ribosomal protein L5 OS=Photobacterium damselae OX=38293 GN=rplE PE=3 SV=1	rplE	3	-0.01331	9	LLENAAADMTAIAGQK(1)PLITVAR	1	9.65717e-45	141.7	1	9.65717e-45	141.7	1	1.33205e-44	139.69	3
	KFZ67_01260	48	K	50S ribosomal protein L5 OS=Photobacterium damselae OX=38293 GN=rplE PE=3 SV=1	rplE	3	-1.7878	3	K(1)LLENAAADMTAIAGQK	1	3.35595e-09	92.439	1	1.85243e-08	85.362	1	3.35595e-09	92.439	3
	KFZ67_01260	120	K	50S ribosomal protein L5 OS=Photobacterium damselae OX=38293 GN=rplE PE=3 SV=1	rplE	2	0.73519	4	GLNPK(1)SFDGR	1	2.12704e-12	133.23	1	5.1016e-08	119.22	1	2.12704e-12	133.23	3
	KFZ67_01260	23	K	50S ribosomal protein L5 OS=Photobacterium damselae OX=38293 GN=rplE PE=3 SV=1	rplE	2	0.036274	3	FEYK(1)SIMQVPK	1	0.000710239	69.815	1	0.0138605	42.629	1	0.000710239	69.815	3
	KFZ67_01260	19	K	50S ribosomal protein L5 OS=Photobacterium damselae OX=38293 GN=rplE PE=3 SV=1	rplE	2	0.12748	4	ELAEK(1)FEYK	1	0.000886144	83.647	1	0.00109004	81.95	1	0.000886144	83.647	3
	KFZ67_01260	9	K	50S ribosomal protein L5 OS=Photobacterium damselae OX=38293 GN=rplE PE=3 SV=1	rplE	3	0.35032	12	LHDYYK(1)ETVVK	1	1.44932e-07	109.16	1	1.44932e-07	109.16	1	5.63111e-07	106.26	3
	KFZ67_01260	3	K	50S ribosomal protein L5 OS=Photobacterium damselae OX=38293 GN=rplE PE=3 SV=1	rplE	2	0.31922	7	AK(1)LHDYYK	1	0.000112963	100.25	1	0.0180025	51.528	1	0.000112963	100.25	3
	KFZ67_01265	28	K	30S ribosomal protein S14 OS=Photobacterium damselae OX=38293 GN=rpsN PE=3 SV=1	rpsN	3	1.1184	5	AALK(1)ALISNVNASEEDRWNAVLK	1	2.75764e-07	69.088	1	2.75764e-07	69.088	1	4.49033e-07	66.467	3
	KFZ67_01270	26	K	30S ribosomal protein S8 OS=Photobacterium damselae OX=38293 GN=rpsH PE=3 SV=1	rpsH	2	-1.1367	3	VAVK(1)MPSSK	1	0.00217051	67.334	1	0.00217051	67.334	1	0.00219916	67.113	3
	KFZ67_01270	118	K	30S ribosomal protein S8 OS=Photobacterium damselae OX=38293 GN=rpsH PE=3 SV=1	rpsH	2	1.0019	3	K(1)AGLGGEIICYVA	1	0.000291491	70.089	1	0.000476811	65.234	1	0.000291491	70.089	3
	KFZ67_01275	27	K	50S ribosomal protein L6 OS=Photobacterium damselae OX=38293 GN=rplF PE=3 SV=1	rplF	2	-0.80805	3	LNGQEITVK(1)GGK	1	0.00210511	76.073	1	0.0069138	66.989	1	0.00210511	76.073	3
	KFZ67_14065	159	K	ATP synthase gamma chain OS=Photobacterium damselae OX=38293 GN=atpG_2 PE=3 SV=1	atpG_2	2	-0.57901	3	K(1)YDEGQLDR	1	0.000532034	86.898	1	0.000532034	86.898	1	0.0211994	45.368	3
	KFZ67_14130	148	K	Membrane protein insertase YidC OS=Photobacterium damselae OX=38293 GN=yidC PE=3 SV=1	yidC	2	-0.25087	3	DFTLAPDQK(1)ELR	1	9.67751e-14	125.54	1	9.67751e-14	125.54	1	1.28819e-09	114.72	3
	KFZ67_14065	31	K	ATP synthase gamma chain OS=Photobacterium damselae OX=38293 GN=atpG_2 PE=3 SV=1	atpG_2	2	-0.17142	4	AMEMVAASK(1)MR	1	1.62399e-06	98.898	1	0.000575889	71.159	1	1.62399e-06	98.898	3
	KFZ67_17025	94	K	ABC transporter substrate-binding protein OS=Photobacterium damselae OX=38293 GN=BST98_20440 PE=4 SV=1	BST98_20440	3	1.8603	3	IQPSLNHALLGQGK(1)IFNIESLLNR	1	2.70763e-33	120.63	1	1.48279e-11	83.317	1	2.70763e-33	120.63	3
	KFZ67_18490	20	K	DUF2750 domain-containing protein OS=Photobacterium damsela subsp. piscicida OX=38294 GN=BEI67_12075 PE=4 SV=1	BEI67_12075	2	-0.7278	3	IAEIQAFDAEK(1)R	1	8.61235e-06	86.772	1	0.000193193	82.85	1	8.61235e-06	86.772	3
	KFZ67_18600	3	K	DUF2750 domain-containing protein OS=Photobacterium damsela subsp. piscicida OX=38294 GN=BEI67_12160 PE=4 SV=1	BEI67_12160	2	0.13335	9	SK(1)LTSDIQANK	1	2.74953e-13	124.34	1	1.11662e-05	91.961	1	2.74953e-13	124.34	3
	KFZ67_03905	256	K	Cofac_haem_bdg domain-containing protein OS=Photobacterium damselae OX=38293 GN=BST98_03890 PE=4 SV=1	BST98_03890	2	0.84678	3	NPK(1)LQVALVTPVTK	1	3.61854e-07	94.63	1	3.61854e-07	94.63	1	9.79843e-07	89.136	3
	KFZ67_03905	186	K	Cofac_haem_bdg domain-containing protein OS=Photobacterium damselae OX=38293 GN=BST98_03890 PE=4 SV=1	BST98_03890	2	1.022	5	LTLSNDAYK(1)QK	1	1.56859e-06	99.283	1	0.000223535	78.342	1	1.56859e-06	99.283	3
	KFZ67_18955	297	K	Long-chain-fatty-acid--CoA ligase FadD15 OS=Photobacterium damselae OX=38293 GN=NCTC11647_02831 PE=4 SV=1	NCTC11647_02831	2	0.6169	9	LADGLGLDK(1)AR	1	1.29682e-13	129.82	1	2.61727e-07	108.35	1	1.29682e-13	129.82	3
	KFZ67_18955	434	K	Long-chain-fatty-acid--CoA ligase FadD15 OS=Photobacterium damselae OX=38293 GN=NCTC11647_02831 PE=4 SV=1	NCTC11647_02831	2	0.79418	3	FVAPVPIEK(1)R	1	1.21157e-07	113.93	1	3.61274e-05	98.04	1	1.21157e-07	113.93	3
	KFZ67_18990	72	K	Uncharacterized protein	--	2	-0.94612	6	GTEDVMK(1)MAEK	1	0.000840199	68.515	1	0.000840199	68.515	1	0.00211581	55.578	3
	KFZ67_18990	65	K	Uncharacterized protein	--	2	-0.49674	5	DELNK(1)GTEDVMK	1	0.000142987	79.492	1	0.00173688	52.576	1	0.000142987	79.492	3
	KFZ67_18990	60	K	Uncharacterized protein	--	2	0.33367	3	DAMTDIK(1)DELNK	1	1.34616e-05	85.417	1	0.0017894	52.132	1	1.34616e-05	85.417	3
	KFZ67_18990	110	K	Uncharacterized protein	--	2	0.087882	9	EEAATQVQEK(1)VIK	1	1.62033e-23	143.42	1	1.62033e-23	143.42	1	4.15313e-23	137.84	3
	KFZ67_18990	100	K	Uncharacterized protein	--	2	1.0503	9	DAMK(1)EEAATQVQEK	1	2.20687e-13	118.52	1	2.31231e-07	94.717	1	2.20687e-13	118.52	3
	KFZ67_18995	229	K	Peroxidase OS=Photobacterium damselae OX=38293 GN=CTM90_03285 PE=4 SV=1	CTM90_03285	3	0.40141	5	LDNIELDDETKPVWAHNNK(1)SK	0.999903	8.77124e-05	52.09	0.999903	0.000918251	42.639	0.999901	8.77124e-05	52.09	3
	KFZ67_19005	100	K	N-acetylneuraminate epimerase OS=Photobacterium damselae OX=38293 GN=nanM PE=4 SV=1	nanM	2	2.3797	3	NIYVFGGSGK(1)AK	1	0.000715088	66.989	1	0.00144689	59.227	1	0.000715088	66.989	3
	KFZ67_19015	8	K	PhnA domain protein OS=Photobacterium damselae OX=38293 GN=BST98_18135 PE=4 SV=1	BST98_18135	2	-0.60017	2	TIEQALK(1)DR	1	0.000444977	90.15	1	0.000444977	90.15	1	0.000444977	90.15	3
	KFZ67_19050	290	K	Flagellar motor protein MotA OS=Photobacterium damselae OX=38293 GN=CTM90_03360 PE=3 SV=1	CTM90_03360	2	0.5569	3	GANLIK(1)IR	1	0.0559561	40.268	1	0.0559561	40.268	1	0.0559561	40.268	3
	KFZ67_19315	160	K	TPR_REGION domain-containing protein OS=Photobacterium damselae subsp. damselae OX=85581 GN=EQ875_01078 PE=4 SV=1	EQ875_01078	2	0.67732	3	LEQLDSGK(1)AADIQR	1	5.52004e-07	92.939	1	9.65402e-05	72.898	1	5.52004e-07	92.939	3
	KFZ67_14065	51	K	ATP synthase gamma chain OS=Photobacterium damselae OX=38293 GN=atpG_2 PE=3 SV=1	atpG_2	4	0.63652	3	K(1)VIGHIALGSLEYQHPYLEER	1	1.08529e-15	86.575	1	1.08529e-15	86.575	1	3.98124e-05	54.857	3
	KFZ67_15190	172	K	SPOR domain-containing protein OS=Photobacterium damselae OX=38293 GN=damX_2 PE=4 SV=1	damX_2	2	0.63833	3	SFANVQADK(1)ETNVVR	1	1.75663e-28	139.58	1	1.75663e-28	139.58	1	2.98142e-18	121.99	3
	KFZ67_16680	274	K	Uncharacterized protein	--	3	0.78876	6	YEVLPWHK(1)K	1	0.00841424	54.982	1	0.0162761	46.462	1	0.00841424	54.982	3
	KFZ67_14595	262	K	NH(3)-dependent NAD(+) synthetase OS=Photobacterium damselae subsp. damselae OX=85581 GN=nadE PE=3 SV=1	nadE	3	0.12085	3	LVNIYK(1)ATEHK	1	0.00162049	58.829	1	0.0030695	52.193	1	0.00162049	58.829	3
	KFZ67_14065	268	K	ATP synthase gamma chain OS=Photobacterium damselae OX=38293 GN=atpG_2 PE=3 SV=1	atpG_2	3	1.1772	3	AATDNAGNLIDDLQLVYNK(1)AR	1	3.83489e-44	141.18	1	2.75744e-21	103.99	1	3.83489e-44	141.18	3
	KFZ67_12950	38	K	YtfJ family protein OS=Photobacterium damselae OX=38293 GN=CTM90_15310 PE=4 SV=1	CTM90_15310	2	-0.2532	6	VQDK(1)GEIVLNK	1	1.6213e-05	88.803	1	8.65298e-05	83.226	1	1.6213e-05	88.803	3
	KFZ67_12950	34	K	YtfJ family protein OS=Photobacterium damselae OX=38293 GN=CTM90_15310 PE=4 SV=1	CTM90_15310	2	-0.1765	2	LGESLPQVK(1)VQDK	1	0.00239544	47.621	1	0.00239544	47.621	1	0.00574018	41.476	3
	KFZ67_09920	64	K	Ferrous iron transport protein A OS=Photobacterium damselae OX=38293 GN=feoA PE=4 SV=1	feoA	2	-0.39703	4	K(1)QIAESIEVEVK	1	0.000135663	79.089	1	0.000639052	66.989	1	0.000135663	79.089	3
	KFZ67_12900	315	K	C4-dicarboxylate ABC transporter substrate-binding protein OS=Photobacterium damselae OX=38293 GN=BST98_12850 PE=4 SV=1	BST98_12850	2	0.37018	3	YYK(1)EAGLLPK	1	0.00448017	56.404	1	0.00448017	56.404	1	0.00477454	55.806	3
	KFZ67_12900	204	K	C4-dicarboxylate ABC transporter substrate-binding protein OS=Photobacterium damselae OX=38293 GN=BST98_12850 PE=4 SV=1	BST98_12850	3	-2.5382	15	IDAFIYMVGHPNGSIK(1)EATTSCNAK	1	1.28846e-24	108.77	1	7.48602e-24	102.27	1	1.28846e-24	108.77	3
	KFZ67_12900	109	K	C4-dicarboxylate ABC transporter substrate-binding protein OS=Photobacterium damselae OX=38293 GN=BST98_12850 PE=4 SV=1	BST98_12850	2	0.29048	6	FKEQGPYPK(1)LR	1	0.000114324	91.549	1	0.000114324	91.549	1	0.000159946	88.596	3
	KFZ67_15075	365	K	Cobalamin ABC transporter substrate-binding protein OS=Photobacterium damselae OX=38293 GN=CTN07_11055 PE=4 SV=1	CTN07_11055	2	0.68903	3	TFIEMNQK(1)FANR	1	3.931e-07	99.752	1	3.931e-07	99.752	1	7.67132e-05	80.69	3
	KFZ67_12900	132	K	C4-dicarboxylate ABC transporter substrate-binding protein OS=Photobacterium damselae OX=38293 GN=BST98_12850 PE=4 SV=1	BST98_12850	2	-0.6616	7	ADSGIK(1)TLADLK	1	2.66145e-06	95.417	1	0.000193426	77.185	1	2.66145e-06	95.417	3
	KFZ67_12900	283	K	C4-dicarboxylate ABC transporter substrate-binding protein OS=Photobacterium damselae OX=38293 GN=BST98_12850 PE=4 SV=1	BST98_12850	2	0.67859	4	AVFENFDTFK(1)R	1	7.96506e-37	166.97	1	1.59382e-36	162.36	1	7.96506e-37	166.97	3
	KFZ67_12890	162	K	Malate dehydrogenase OS=Photobacterium damselae subsp. damselae OX=85581 GN=mdh PE=3 SV=1	mdh	2	0.97471	3	SETFVAELK(1)GK	1	0.000294285	75.819	1	0.00106502	66.267	1	0.000294285	75.819	3
	KFZ67_12890	142	K	Malate dehydrogenase OS=Photobacterium damselae subsp. damselae OX=85581 GN=mdh PE=3 SV=1	mdh	2	-2.2154	3	K(1)LFGITTLDVIR	1	1.83179e-27	149.23	1	1.83179e-27	149.23	1	4.2682e-20	142.97	3
	KFZ67_12630	62	K	Arylsulfatase OS=Photobacterium damsela subsp. piscicida OX=38294 GN=BEI67_14920 PE=4 SV=1	BEI67_14920	2	0.91173	3	VVLLDTNK(1)SSGFSR	1	7.12217e-05	75.764	1	7.12217e-05	75.764	1	0.000345015	60.937	3
	KFZ67_12020	962	K	Carbamoyl-phosphate synthase large chain OS=Photobacterium damselae OX=38293 GN=carB PE=3 SV=1	carB	2	-0.49538	2	VVDLASK(1)LIK	1	0.00603875	53.237	1	0.00603875	53.237	1	0.0122454	46.796	3
	KFZ67_12020	527	K	Carbamoyl-phosphate synthase large chain OS=Photobacterium damselae OX=38293 GN=carB PE=3 SV=1	carB	3	0.69896	3	DQYNIHPVYK(1)R	1	0.000247754	75.088	1	0.000247754	75.088	1	0.000951988	64.82	3
	KFZ67_12020	862	K	Carbamoyl-phosphate synthase large chain OS=Photobacterium damselae OX=38293 GN=carB PE=3 SV=1	carB	2	1.3258	3	ATGAPLAK(1)IAAR	1	0.0008409	65.179	1	0.0008409	65.179	1	0.0008409	65.179	3
	KFZ67_11225	33	K	Cytoskeleton protein RodZ OS=Photobacterium damselae OX=38293 GN=rodZ PE=4 SV=1	rodZ	2	1.5312	4	EQLGYSQK(1)DIANR	1	7.3141e-05	80.96	1	0.00111145	56.569	1	7.3141e-05	80.96	3
	KFZ67_11090	147	K	Transcription antitermination protein NusB OS=Photobacterium damselae OX=38293 GN=nusB PE=3 SV=1	nusB	2	-1.0054	2	FVNGVLDK(1)AAPSLR	1	7.12217e-05	75.764	1	7.12217e-05	75.764	1	7.81808e-05	74.789	3
	KFZ67_12890	21	K	Malate dehydrogenase OS=Photobacterium damselae subsp. damselae OX=85581 GN=mdh PE=3 SV=1	mdh	3	-0.24109	3	VAVIGAAGGIGQALALLLK(1)NR	1	2.19203e-53	148.41	1	2.23028e-27	118.31	1	2.19203e-53	148.41	3
other | Extracellular	KFZ67_15435	6	K	ABC transporter substrate-binding protein OS=Photobacterium damselae OX=38293 GN=BST98_16505 PE=4 SV=1	BST98_16505	3	0.49306	3	MTPQEK(1)ELILSVANK	1	2.10256e-05	66.387	1	0.000111114	58.658	1	2.10256e-05	66.387	3
	KFZ67_15435	15	K	ABC transporter substrate-binding protein OS=Photobacterium damselae OX=38293 GN=BST98_16505 PE=4 SV=1	BST98_16505	2	-0.4855	3	ELILSVANK(1)LK	1	8.25992e-07	104.43	1	8.25992e-07	104.43	1	1.65431e-05	88.596	3
	KFZ67_15435	69	K	ABC transporter substrate-binding protein OS=Photobacterium damselae OX=38293 GN=BST98_16505 PE=4 SV=1	BST98_16505	2	-0.75177	3	EQNEYLQK(1)NSEYYK	1	8.79917e-05	73.415	1	0.000148764	70.373	1	8.79917e-05	73.415	3
	KFZ67_10625	114	K	Flagellin OS=Photobacterium lutimaris OX=388278 GN=C9I99_24520 PE=3 SV=1	C9I99_24520	2	2.0343	2	AAIQK(1)EVDQLK	1	0.00281143	56.936	1	0.00281143	56.936	1	0.00942412	45.764	3

## Sheet: Classify
Subcellular localization		Number of proteins
Cytoplasmic	0.488491	191
Cytoplasmic Membrane	0.345269	135
Outer Membrane	0.0664962	26
Periplasmic	0.056266	22
Unknown	0.0383632	15
other	0.00511509	2
