# Supplementary material for: Global analysis of protein lysine lactylation profiles in the marine bacterium Photobacterium damselae subsp. damselae
Source: Front Microbiol. 2025 Jun 17;16:1539893. doi: 10.3389/fmicb.2025.1539893 (PMC12209183; doi:10.3389/fmicb.2025.1539893)
Supplement: Supplementary file 6 [file Table_5.xlsx]

## Sheet: ident Pathway2Protein
Table S5. KEGG pathway-based enrichment analysis of Klac-modified proteins in P. damsela
KEGG pathway	Fisher's exact test p value	Fold Enrichment	Protein accession	Position	Amino acid	KEGG KO No.	KEGG Gene	Protein description	Gene name	Charge	Mass error [ppm]	MS/MS Count	Modified sequence	Localization prob Exp1	PEP Exp1	Score Exp1	Localization prob Exp2	PEP Exp2	Score Exp2	Localization prob Exp3	PEP Exp3
map00010 Glycolysis / Gluconeogenesis	7.55425e-07	2.98	KFZ67_00790	85	K	K15633	gpmI; 2,3-bisphosphoglycerate-independent phosphoglycerate mutase [EC:5.4.2.12]	2,3-bisphosphoglycerate-independent phosphoglycerate mutase OS=Photobacterium damselae OX=38293 GN=gpmI PE=3 SV=1	gpmI	3	1.0038	4	ITK(1)AISDGEFFENDVLVAAMDAAIK	1	1.0874e-07	69.284	1	1.0874e-07	69.284	1	3.09664e-05
map00010 Glycolysis / Gluconeogenesis	7.55425e-07	2.98	KFZ67_00790	5	K	K15633	gpmI; 2,3-bisphosphoglycerate-independent phosphoglycerate mutase [EC:5.4.2.12]	2,3-bisphosphoglycerate-independent phosphoglycerate mutase OS=Photobacterium damselae OX=38293 GN=gpmI PE=3 SV=1	gpmI	3	0.59951	3	K(1)PLALVILDGWGYR	1	7.4024e-10	98.337	1	7.4024e-10	98.337	1	4.98505e-05
map00010 Glycolysis / Gluconeogenesis	7.55425e-07	2.98	KFZ67_00790	480	K	K15633	gpmI; 2,3-bisphosphoglycerate-independent phosphoglycerate mutase [EC:5.4.2.12]	2,3-bisphosphoglycerate-independent phosphoglycerate mutase OS=Photobacterium damselae OX=38293 GN=gpmI PE=3 SV=1	gpmI	2	1.5935	4	SLTLK(1)DNGK	1	4.4525e-24	148.52	1	4.99976e-24	147.2	1	4.4525e-24
map00010 Glycolysis / Gluconeogenesis	7.55425e-07	2.98	KFZ67_00835	215	K	K00850	pfkA, PFK; 6-phosphofructokinase 1 [EC:2.7.1.11]	ATP-dependent 6-phosphofructokinase OS=Photobacterium damselae OX=38293 GN=pfkA PE=3 SV=1	pfkA	3	1.7226	3	K(1)HAIIAITELMTDVNELAK	1	2.59634e-12	94.281	1	8.68522e-12	85.937	1	2.59634e-12
map00010 Glycolysis / Gluconeogenesis	7.55425e-07	2.98	KFZ67_00840	11	K	K01803	TPI, tpiA; triosephosphate isomerase (TIM) [EC:5.3.1.1]	Triosephosphate isomerase OS=Photobacterium damselae OX=38293 GN=tpiA PE=3 SV=1	tpiA	2	1.236	7	HPVVMGNWK(1)LNGSK	1	4.98702e-13	116.63	1	8.79917e-05	73.415	1	4.98702e-13
map00010 Glycolysis / Gluconeogenesis	7.55425e-07	2.98	KFZ67_01975	466	K	K00163	aceE; pyruvate dehydrogenase E1 component [EC:1.2.4.1]	Pyruvate dehydrogenase E1 component OS=Photobacterium damselae subsp. damselae OX=85581 GN=aceE PE=4 SV=1	aceE	3	-0.23359	3	DALHGYTPK(1)R	1	9.94784e-05	93.096	1	0.00140899	64.82	1	9.94784e-05
map00010 Glycolysis / Gluconeogenesis	7.55425e-07	2.98	KFZ67_01975	360	K	K00163	aceE; pyruvate dehydrogenase E1 component [EC:1.2.4.1]	Pyruvate dehydrogenase E1 component OS=Photobacterium damselae subsp. damselae OX=85581 GN=aceE PE=4 SV=1	aceE	3	-1.3058	4	YPETAALVADMTDDEIFALK(1)R	1	3.65445e-07	68.952	1	9.00136e-07	62.648	1	3.65445e-07
map00010 Glycolysis / Gluconeogenesis	7.55425e-07	2.98	KFZ67_01975	389	K	K00163	aceE; pyruvate dehydrogenase E1 component [EC:1.2.4.1]	Pyruvate dehydrogenase E1 component OS=Photobacterium damselae subsp. damselae OX=85581 GN=aceE PE=4 SV=1	aceE	2	0.039841	4	ETQGKPTVILAK(1)TIK	0.999998	0.000260164	65.231	0.999975	0.00226635	54.764	0.999998	0.000260164
map00010 Glycolysis / Gluconeogenesis	7.55425e-07	2.98	KFZ67_01975	392	K	K00163	aceE; pyruvate dehydrogenase E1 component [EC:1.2.4.1]	Pyruvate dehydrogenase E1 component OS=Photobacterium damselae subsp. damselae OX=85581 GN=aceE PE=4 SV=1	aceE	2	0.54867	9	TIK(1)GYGMGDAAEGK	1	1.16173e-06	87.519	1	5.03359e-05	78.69	1	1.16173e-06
map00010 Glycolysis / Gluconeogenesis	7.55425e-07	2.98	KFZ67_01975	509	K	K00163	aceE; pyruvate dehydrogenase E1 component [EC:1.2.4.1]	Pyruvate dehydrogenase E1 component OS=Photobacterium damselae subsp. damselae OX=85581 GN=aceE PE=4 SV=1	aceE	2	0.1758	4	ILNILLK(1)DK	1	0.000680928	85.355	1	0.00194444	74.841	1	0.000680928
map00010 Glycolysis / Gluconeogenesis	7.55425e-07	2.98	KFZ67_01975	411	K	K00163	aceE; pyruvate dehydrogenase E1 component [EC:1.2.4.1]	Pyruvate dehydrogenase E1 component OS=Photobacterium damselae subsp. damselae OX=85581 GN=aceE PE=4 SV=1	aceE	4	-2.3066	7	K(1)MDMTHVQHLR	1	4.7509e-06	108.7	1	0.00011672	79.659	1	4.7509e-06
map00010 Glycolysis / Gluconeogenesis	7.55425e-07	2.98	KFZ67_01975	377	K	K00163	aceE; pyruvate dehydrogenase E1 component [EC:1.2.4.1]	Pyruvate dehydrogenase E1 component OS=Photobacterium damselae subsp. damselae OX=85581 GN=aceE PE=4 SV=1	aceE	2	-4.3321	3	LFAAFNNAK(1)ETQGK	1	6.94686e-05	81.904	1	6.94686e-05	76.01	1	7.7979e-05
map00010 Glycolysis / Gluconeogenesis	7.55425e-07	2.98	KFZ67_01975	872	K	K00163	aceE; pyruvate dehydrogenase E1 component [EC:1.2.4.1]	Pyruvate dehydrogenase E1 component OS=Photobacterium damselae subsp. damselae OX=85581 GN=aceE PE=4 SV=1	aceE	2	1.5299	6	SVVADAIK(1)K	1	0.00364803	63.397	1	0.00393358	61.78	1	0.00364803
map00010 Glycolysis / Gluconeogenesis	7.55425e-07	2.98	KFZ67_01980	339	K	K00627	DLAT, aceF, pdhC; pyruvate dehydrogenase E2 component (dihydrolipoamide acetyltransferase) [EC:2.3.1.12]	Acetyltransferase component of pyruvate dehydrogenase complex OS=Photobacterium damselae subsp. damselae OX=85581 GN=aceF PE=3 SV=1	aceF	2	1.0038	3	EFGVNLAK(1)VK	1	0.000550774	79.148	1	0.000550774	79.148	1	0.00134743
map00010 Glycolysis / Gluconeogenesis	7.55425e-07	2.98	KFZ67_01980	351	K	K00627	DLAT, aceF, pdhC; pyruvate dehydrogenase E2 component (dihydrolipoamide acetyltransferase) [EC:2.3.1.12]	Acetyltransferase component of pyruvate dehydrogenase complex OS=Photobacterium damselae subsp. damselae OX=85581 GN=aceF PE=3 SV=1	aceF	2	0.33202	3	ILK(1)EDVQNFVK	1	2.46783e-09	116.55	1	2.46783e-09	116.55	1	2.87648e-09
map00010 Glycolysis / Gluconeogenesis	7.55425e-07	2.98	KFZ67_01985	256	K	K00382	DLD, lpd, pdhD; dihydrolipoamide dehydrogenase [EC:1.8.1.4]	Dihydrolipoyl dehydrogenase OS=Photobacterium damselae OX=38293 GN=lpdA PE=3 SV=1	lpdA	2	0.49886	3	EDGIYVSMEGK(1)K	1	0.000201095	75.739	1	0.000201095	75.739	1	0.00026044
map00010 Glycolysis / Gluconeogenesis	7.55425e-07	2.98	KFZ67_01985	300	K	K00382	DLD, lpd, pdhD; dihydrolipoamide dehydrogenase [EC:1.8.1.4]	Dihydrolipoyl dehydrogenase OS=Photobacterium damselae OX=38293 GN=lpdA PE=3 SV=1	lpdA	2	-0.61459	7	GFIHVDK(1)QMR	1	1.1894e-07	114.97	1	0.000187872	89.679	1	1.1894e-07
map00010 Glycolysis / Gluconeogenesis	7.55425e-07	2.98	KFZ67_01985	285	K	K00382	DLD, lpd, pdhD; dihydrolipoamide dehydrogenase [EC:1.8.1.4]	Dihydrolipoyl dehydrogenase OS=Photobacterium damselae OX=38293 GN=lpdA PE=3 SV=1	lpdA	2	0.00077076	3	LLDAEK(1)AGIEVDER	1	1.16173e-06	87.519	1	1.16173e-06	87.519	1	1.50465e-05
map00010 Glycolysis / Gluconeogenesis	7.55425e-07	2.98	KFZ67_01985	152	K	K00382	DLD, lpd, pdhD; dihydrolipoamide dehydrogenase [EC:1.8.1.4]	Dihydrolipoyl dehydrogenase OS=Photobacterium damselae OX=38293 GN=lpdA PE=3 SV=1	lpdA	3	-0.61856	2	PIK(1)LPFIPHEDPR	1	0.000130685	73.927	1	0.000391848	65.043	1	0.000130685
map00010 Glycolysis / Gluconeogenesis	7.55425e-07	2.98	KFZ67_01985	279	K	K00382	DLD, lpd, pdhD; dihydrolipoamide dehydrogenase [EC:1.8.1.4]	Dihydrolipoyl dehydrogenase OS=Photobacterium damselae OX=38293 GN=lpdA PE=3 SV=1	lpdA	2	-0.014866	6	VPNGK(1)LLDAEK	1	7.26591e-06	94.402	1	7.26591e-06	94.402	1	6.00796e-05
map00010 Glycolysis / Gluconeogenesis	7.55425e-07	2.98	KFZ67_02330	27	K	K00927	PGK, pgk; phosphoglycerate kinase [EC:2.7.2.3]	Phosphoglycerate kinase OS=Photobacterium damsela subsp. piscicida OX=38294 GN=pgk PE=3 SV=1	pgk	2	-0.89737	7	ADLNVPVK(1)DGK	1	0.000824172	68.676	1	0.00127952	64.121	1	0.000824172
map00010 Glycolysis / Gluconeogenesis	7.55425e-07	2.98	KFZ67_02330	53	K	K00927	PGK, pgk; phosphoglycerate kinase [EC:2.7.2.3]	Phosphoglycerate kinase OS=Photobacterium damsela subsp. piscicida OX=38294 GN=pgk PE=3 SV=1	pgk	3	-0.76268	3	HCLEAGAK(1)VMVTSHLGR	1	8.61424e-13	103.13	1	3.76371e-06	65.105	1	8.61424e-13
map00010 Glycolysis / Gluconeogenesis	7.55425e-07	2.98	KFZ67_02330	374	K	K00927	PGK, pgk; phosphoglycerate kinase [EC:2.7.2.3]	Phosphoglycerate kinase OS=Photobacterium damsela subsp. piscicida OX=38294 GN=pgk PE=3 SV=1	pgk	2	-0.1494	6	K(1)LPAVEMLETR	1	9.57148e-06	92.247	1	9.57148e-06	92.247	1	1.83278e-05
map00010 Glycolysis / Gluconeogenesis	7.55425e-07	2.98	KFZ67_02330	14	K	K00927	PGK, pgk; phosphoglycerate kinase [EC:2.7.2.3]	Phosphoglycerate kinase OS=Photobacterium damsela subsp. piscicida OX=38294 GN=pgk PE=3 SV=1	pgk	2	0.018359	19	MTDLDLAGK(1)R	1	2.85585e-45	179.1	1	2.85585e-45	179.1	1	1.47692e-24
map00010 Glycolysis / Gluconeogenesis	7.55425e-07	2.98	KFZ67_02330	193	K	K00927	PGK, pgk; phosphoglycerate kinase [EC:2.7.2.3]	Phosphoglycerate kinase OS=Photobacterium damsela subsp. piscicida OX=38294 GN=pgk PE=3 SV=1	pgk	2	4.0599	5	PMVAIVGGSK(1)VSTK	1	2.20557e-05	82.651	1	2.20557e-05	82.651	1	8.49995e-05
map00010 Glycolysis / Gluconeogenesis	7.55425e-07	2.98	KFZ67_02330	197	K	K00927	PGK, pgk; phosphoglycerate kinase [EC:2.7.2.3]	Phosphoglycerate kinase OS=Photobacterium damsela subsp. piscicida OX=38294 GN=pgk PE=3 SV=1	pgk	2	-1.0685	3	VSTK(1)LTVLESLSK	1	0.000130554	77.204	1	0.0004135	68.044	1	0.000130554
map00010 Glycolysis / Gluconeogenesis	7.55425e-07	2.98	KFZ67_02330	5	K	K00927	PGK, pgk; phosphoglycerate kinase [EC:2.7.2.3]	Phosphoglycerate kinase OS=Photobacterium damsela subsp. piscicida OX=38294 GN=pgk PE=3 SV=1	pgk	2	1.8353	13	SVIK(1)MTDLDLAGK	1	0.000249755	71.879	1	0.000249755	71.879	1	0.000265057
map00010 Glycolysis / Gluconeogenesis	7.55425e-07	2.98	KFZ67_02335	72	K	K01624	FBA, fbaA; fructose-bisphosphate aldolase, class II [EC:4.1.2.13]	Fructose-bisphosphate aldolase OS=Photobacterium damselae OX=38293 GN=fbaA PE=3 SV=1	fbaA	3	2.129	2	APVIVQFSNGGAAFFAGK(1)GLK	1	9.91832e-36	133.94	1	3.94466e-35	131.67	1	9.91832e-36
map00010 Glycolysis / Gluconeogenesis	7.55425e-07	2.98	KFZ67_02335	75	K	K01624	FBA, fbaA; fructose-bisphosphate aldolase, class II [EC:4.1.2.13]	Fructose-bisphosphate aldolase OS=Photobacterium damselae OX=38293 GN=fbaA PE=3 SV=1	fbaA	2	1.6554	6	GLK(1)LEGQEAQIK	1	8.87281e-06	87.719	1	0.00424577	63.091	1	8.87281e-06
map00010 Glycolysis / Gluconeogenesis	7.55425e-07	2.98	KFZ67_02335	29	K	K01624	FBA, fbaA; fructose-bisphosphate aldolase, class II [EC:4.1.2.13]	Fructose-bisphosphate aldolase OS=Photobacterium damselae OX=38293 GN=fbaA PE=3 SV=1	fbaA	3	-1.3666	2	ENK(1)FALPAVNVVNTDTINGVLEAAAK	1	1.71893e-11	80.02	1	1.71893e-11	80.02	1	1.01532e-07
map00010 Glycolysis / Gluconeogenesis	7.55425e-07	2.98	KFZ67_02335	325	K	K01624	FBA, fbaA; fructose-bisphosphate aldolase, class II [EC:4.1.2.13]	Fructose-bisphosphate aldolase OS=Photobacterium damselae OX=38293 GN=fbaA PE=3 SV=1	fbaA	3	-0.39934	10	KFEAENHDYLQGQIGNPTGPDAPNK(1)K	1	1.11269e-42	130.98	1	9.16463e-33	114.75	1	1.11269e-42
map00010 Glycolysis / Gluconeogenesis	7.55425e-07	2.98	KFZ67_02335	84	K	K01624	FBA, fbaA; fructose-bisphosphate aldolase, class II [EC:4.1.2.13]	Fructose-bisphosphate aldolase OS=Photobacterium damselae OX=38293 GN=fbaA PE=3 SV=1	fbaA	2	0.40311	5	LEGQEAQIK(1)GAVAGAK	1	9.57618e-09	94.487	1	9.57618e-09	94.487	1	2.26457e-08
map00010 Glycolysis / Gluconeogenesis	7.55425e-07	2.98	KFZ67_02335	20	K	K01624	FBA, fbaA; fructose-bisphosphate aldolase, class II [EC:4.1.2.13]	Fructose-bisphosphate aldolase OS=Photobacterium damselae OX=38293 GN=fbaA PE=3 SV=1	fbaA	3	0.52701	5	IFDFVKPGVISGDDVQK(1)VFEVAK	1	4.81435e-22	107.21	0.999677	5.6263e-07	64.749	1	4.81435e-22
map00010 Glycolysis / Gluconeogenesis	7.55425e-07	2.98	KFZ67_02335	26	K	K01624	FBA, fbaA; fructose-bisphosphate aldolase, class II [EC:4.1.2.13]	Fructose-bisphosphate aldolase OS=Photobacterium damselae OX=38293 GN=fbaA PE=3 SV=1	fbaA	2	1.0733	6	VFEVAK(1)ENK	1	1.00106e-07	119.75	1	1.00106e-07	119.75	1	3.84516e-05
map00010 Glycolysis / Gluconeogenesis	7.55425e-07	2.98	KFZ67_02335	301	K	K01624	FBA, fbaA; fructose-bisphosphate aldolase, class II [EC:4.1.2.13]	Fructose-bisphosphate aldolase OS=Photobacterium damselae OX=38293 GN=fbaA PE=3 SV=1	fbaA	3	0.21001	8	K(1)FEAENHDYLQGQIGNPTGPDAPNK	1	2.10236e-16	86.18	1	1.18301e-07	69.284	1	2.10236e-16
map00010 Glycolysis / Gluconeogenesis	7.55425e-07	2.98	KFZ67_02335	113	K	K01624	FBA, fbaA; fructose-bisphosphate aldolase, class II [EC:4.1.2.13]	Fructose-bisphosphate aldolase OS=Photobacterium damselae OX=38293 GN=fbaA PE=3 SV=1	fbaA	5	-0.76607	13	YVHAIAETYGVPVILHTDHAAK(1)K	1	1.63571e-44	136.49	1	3.60001e-35	122.94	1	1.63571e-44
map00010 Glycolysis / Gluconeogenesis	7.55425e-07	2.98	KFZ67_02535	427	K	K01689	ENO, eno; enolase [EC:4.2.1.11]	Enolase OS=Photobacterium damselae OX=38293 GN=eno PE=3 SV=1	eno	2	-0.59808	8	APFNGLK(1)EVK	1	0.000183885	89.9	1	0.00111448	70.675	1	0.000183885
map00010 Glycolysis / Gluconeogenesis	7.55425e-07	2.98	KFZ67_02535	85	K	K01689	ENO, eno; enolase [EC:4.2.1.11]	Enolase OS=Photobacterium damselae OX=38293 GN=eno PE=3 SV=1	eno	3	-1.2424	15	DAK(1)DQAAIDQIMIDLDGTENK	1	7.41891e-64	162.73	1	7.41891e-64	162.73	1	2.42034e-53
map00010 Glycolysis / Gluconeogenesis	7.55425e-07	2.98	KFZ67_02535	255	K	K01689	ENO, eno; enolase [EC:4.2.1.11]	Enolase OS=Photobacterium damselae OX=38293 GN=eno PE=3 SV=1	eno	3	4.3109	11	DVTLAMDCAASEFYNK(1)EEGIYDLK	1	1.54896e-23	98.3	1	6.03072e-08	71.651	1	1.54896e-23
map00010 Glycolysis / Gluconeogenesis	7.55425e-07	2.98	KFZ67_02535	263	K	K01689	ENO, eno; enolase [EC:4.2.1.11]	Enolase OS=Photobacterium damselae OX=38293 GN=eno PE=3 SV=1	eno	2	-1.1276	10	EEGIYDLK(1)GEGK	1	5.62616e-07	100.38	1	1.52967e-06	96.82	1	5.62616e-07
map00010 Glycolysis / Gluconeogenesis	7.55425e-07	2.98	KFZ67_02535	62	K	K01689	ENO, eno; enolase [EC:4.2.1.11]	Enolase OS=Photobacterium damselae OX=38293 GN=eno PE=3 SV=1	eno	2	-0.40512	5	FLGK(1)GVLK	1	0.00689487	70.552	1	0.0283621	49.097	1	0.00689487
map00010 Glycolysis / Gluconeogenesis	7.55425e-07	2.98	KFZ67_02535	66	K	K01689	ENO, eno; enolase [EC:4.2.1.11]	Enolase OS=Photobacterium damselae OX=38293 GN=eno PE=3 SV=1	eno	3	0.30804	6	GVLK(1)AVTAVNGPIAEALLGK	1	1.65234e-12	88.176	1	6.02277e-10	74.029	1	1.65234e-12
map00010 Glycolysis / Gluconeogenesis	7.55425e-07	2.98	KFZ67_02535	358	K	K01689	ENO, eno; enolase [EC:4.2.1.11]	Enolase OS=Photobacterium damselae OX=38293 GN=eno PE=3 SV=1	eno	3	0.29186	3	FNQIGSLTETLAAIK(1)MAK	1	5.20181e-12	93.495	1	5.20181e-12	93.495	1	1.24077e-09
map00010 Glycolysis / Gluconeogenesis	7.55425e-07	2.98	KFZ67_02535	361	K	K01689	ENO, eno; enolase [EC:4.2.1.11]	Enolase OS=Photobacterium damselae OX=38293 GN=eno PE=3 SV=1	eno	3	-0.37269	7	MAK(1)DAGYTAVISHR	1	2.26609e-32	157.86	1	2.95933e-18	133.48	1	2.26609e-32
map00010 Glycolysis / Gluconeogenesis	7.55425e-07	2.98	KFZ67_02535	326	K	K01689	ENO, eno; enolase [EC:4.2.1.11]	Enolase OS=Photobacterium damselae OX=38293 GN=eno PE=3 SV=1	eno	3	-0.44436	3	IQLVGDDLFVTNTK(1)ILAEGIEK	1	3.12209e-35	130.89	1	3.12209e-35	130.89	1	2.17598e-21
map00010 Glycolysis / Gluconeogenesis	7.55425e-07	2.98	KFZ67_02535	312	K	K01689	ENO, eno; enolase [EC:4.2.1.11]	Enolase OS=Photobacterium damselae OX=38293 GN=eno PE=3 SV=1	eno	3	1.3262	5	LLGDK(1)IQLVGDDLFVTNTK	1	2.90195e-22	121.01	1	2.23582e-21	111.6	1	2.90195e-22
map00010 Glycolysis / Gluconeogenesis	7.55425e-07	2.98	KFZ67_02535	120	K	K01689	ENO, eno; enolase [EC:4.2.1.11]	Enolase OS=Photobacterium damselae OX=38293 GN=eno PE=3 SV=1	eno	3	-0.13408	4	SNFGANAILAVSLANAK(1)AAAAAK	1	1.97278e-35	129.2	1	1.97278e-35	129.2	1	1.65142e-27
map00010 Glycolysis / Gluconeogenesis	7.55425e-07	2.98	KFZ67_02535	406	K	K01689	ENO, eno; enolase [EC:4.2.1.11]	Enolase OS=Photobacterium damselae OX=38293 GN=eno PE=3 SV=1	eno	2	-0.2721	5	VAK(1)YNQLIR	1	6.97595e-17	138.54	1	8.41821e-17	136.8	1	6.97595e-17
map00010 Glycolysis / Gluconeogenesis	7.55425e-07	2.98	KFZ67_04535	261	K	K00134	GAPDH, gapA; glyceraldehyde 3-phosphate dehydrogenase [EC:1.2.1.12]	Glyceraldehyde-3-phosphate dehydrogenase OS=Photobacterium damselae OX=38293 GN=BST98_04565 PE=3 SV=1	BST98_04565	2	0.63932	5	AMK(1)DASEGSLK	1	8.3041e-07	101.39	1	8.3041e-07	101.39	1	1.17696e-06
map00010 Glycolysis / Gluconeogenesis	7.55425e-07	2.98	KFZ67_04535	269	K	K00134	GAPDH, gapA; glyceraldehyde 3-phosphate dehydrogenase [EC:1.2.1.12]	Glyceraldehyde-3-phosphate dehydrogenase OS=Photobacterium damselae OX=38293 GN=BST98_04565 PE=3 SV=1	BST98_04565	3	-1.3297	6	DASEGSLK(1)GILGYTEDAVVSTDFNGDTR	1	3.40921e-46	123.19	1	3.40921e-46	123.19	1	1.64781e-19
map00010 Glycolysis / Gluconeogenesis	7.55425e-07	2.98	KFZ67_04535	225	K	K00134	GAPDH, gapA; glyceraldehyde 3-phosphate dehydrogenase [EC:1.2.1.12]	Glyceraldehyde-3-phosphate dehydrogenase OS=Photobacterium damselae OX=38293 GN=BST98_04565 PE=3 SV=1	BST98_04565	3	-1.2794	3	AVGVVLPEVNGK(1)LTGMAFR	1	4.58562e-52	144.15	1	1.80574e-36	144.15	1	4.58562e-52
map00010 Glycolysis / Gluconeogenesis	7.55425e-07	2.98	KFZ67_04535	70	K	K00134	GAPDH, gapA; glyceraldehyde 3-phosphate dehydrogenase [EC:1.2.1.12]	Glyceraldehyde-3-phosphate dehydrogenase OS=Photobacterium damselae OX=38293 GN=BST98_04565 PE=3 SV=1	BST98_04565	3	1.451	5	FNGTVEVEGGNLIVNGK(1)TVR	1	6.36502e-22	110.33	1	6.36502e-22	110.33	1	1.6887e-12
map00010 Glycolysis / Gluconeogenesis	7.55425e-07	2.98	KFZ67_04535	258	K	K00134	GAPDH, gapA; glyceraldehyde 3-phosphate dehydrogenase [EC:1.2.1.12]	Glyceraldehyde-3-phosphate dehydrogenase OS=Photobacterium damselae OX=38293 GN=BST98_04565 PE=3 SV=1	BST98_04565	2	-0.93259	7	NGASYETICK(1)AMK	1	2.37952e-06	88.101	1	0.000101745	79.089	1	2.37952e-06
map00010 Glycolysis / Gluconeogenesis	7.55425e-07	2.98	KFZ67_04535	4	K	K00134	GAPDH, gapA; glyceraldehyde 3-phosphate dehydrogenase [EC:1.2.1.12]	Glyceraldehyde-3-phosphate dehydrogenase OS=Photobacterium damselae OX=38293 GN=BST98_04565 PE=3 SV=1	BST98_04565	2	1.2903	3	TIK(1)VGINGFGR	1	2.28342e-05	97.472	1	9.04359e-05	93.096	1	2.28342e-05
map00010 Glycolysis / Gluconeogenesis	7.55425e-07	2.98	KFZ67_04535	192	K	K00134	GAPDH, gapA; glyceraldehyde 3-phosphate dehydrogenase [EC:1.2.1.12]	Glyceraldehyde-3-phosphate dehydrogenase OS=Photobacterium damselae OX=38293 GN=BST98_04565 PE=3 SV=1	BST98_04565	2	-0.48363	5	TVDGPSAK(1)DWR	1	1.02847e-60	189.58	1	1.02847e-60	189.58	1	6.9966e-48
map00010 Glycolysis / Gluconeogenesis	7.55425e-07	2.98	KFZ67_04535	184	K	K00134	GAPDH, gapA; glyceraldehyde 3-phosphate dehydrogenase [EC:1.2.1.12]	Glyceraldehyde-3-phosphate dehydrogenase OS=Photobacterium damselae OX=38293 GN=BST98_04565 PE=3 SV=1	BST98_04565	3	-0.80049	11	VLNDNFGIESGLMTTVHATTATQK(1)TVDGPSAK	1	3.62959e-14	79.917	1	3.71691e-14	79.782	1	3.62959e-14
map00010 Glycolysis / Gluconeogenesis	7.55425e-07	2.98	KFZ67_05195	11	K	K02779	PTS-Glc-EIIC, ptsG; PTS system, glucose-specific IIC component	EIICB-Glc OS=Photobacterium damselae OX=38293 GN=ptsG_4 PE=4 SV=1	ptsG_4	2	0.56095	3	NLFASLQK(1)VGK	1	0.000838164	68.536	1	0.000838164	68.536	1	0.00180959
map00010 Glycolysis / Gluconeogenesis	7.55425e-07	2.98	KFZ67_05195	433	K	K02779	PTS-Glc-EIIC, ptsG; PTS system, glucose-specific IIC component	EIICB-Glc OS=Photobacterium damselae OX=38293 GN=ptsG_4 PE=4 SV=1	ptsG_4	2	-1.0016	4	VSVADVNK(1)VDQDR	1	1.66454e-12	113.76	1	1.27227e-06	92.636	1	1.66454e-12
map00010 Glycolysis / Gluconeogenesis	7.55425e-07	2.98	KFZ67_05990	219	K	K00873	PK, pyk; pyruvate kinase [EC:2.7.1.40]	Pyruvate kinase OS=Photobacterium damselae OX=38293 GN=BST98_06040 PE=3 SV=1	BST98_06040	2	0.4741	3	LAEEAGLQAK(1)LVAK	1	0.0002391	66.004	1	0.00111565	48.532	1	0.0002391
map00010 Glycolysis / Gluconeogenesis	7.55425e-07	2.98	KFZ67_10005	273	K	K01835	pgm; phosphoglucomutase [EC:5.4.2.2]	Phosphoglucomutase, alpha-D-glucose phosphate-specific OS=Photobacterium damselae OX=38293 GN=BST98_09950 PE=3 SV=1	BST98_09950	2	1.1601	6	FMSLDK(1)DGVIR	1	0.00024225	77.674	1	0.00597825	50.354	1	0.00024225
map00010 Glycolysis / Gluconeogenesis	7.55425e-07	2.98	KFZ67_10005	525	K	K01835	pgm; phosphoglucomutase [EC:5.4.2.2]	Phosphoglucomutase, alpha-D-glucose phosphate-specific OS=Photobacterium damselae OX=38293 GN=BST98_09950 PE=3 SV=1	BST98_09950	3	0.084306	3	GK(1)EHLALIEK	1	0.000584808	73.435	1	0.000764397	71.176	1	0.000584808
map00010 Glycolysis / Gluconeogenesis	7.55425e-07	2.98	KFZ67_10820	133	K	K02777	PTS-Glc-EIIA, crr; PTS system, sugar-specific IIA component [EC:2.7.1.-]	Glucose-specific phosphotransferase enzyme IIA component OS=Photobacterium damsela subsp. piscicida OX=38294 GN=BEI67_10460 PE=4 SV=1	BEI67_10460	3	-1.2435	4	AK(1)STLTPVVISNMDEIK	1	1.28845e-12	99.663	1	3.12012e-07	79.92	1	1.28845e-12
map00010 Glycolysis / Gluconeogenesis	7.55425e-07	2.98	KFZ67_10820	6	K	K02777	PTS-Glc-EIIA, crr; PTS system, sugar-specific IIA component [EC:2.7.1.-]	Glucose-specific phosphotransferase enzyme IIA component OS=Photobacterium damsela subsp. piscicida OX=38294 GN=BEI67_10460 PE=4 SV=1	BEI67_10460	2	0.65091	4	GLFDK(1)LK	1	0.00959035	83.614	1	0.0477041	50.632	1	0.00959035
map00010 Glycolysis / Gluconeogenesis	7.55425e-07	2.98	KFZ67_10820	54	K	K02777	PTS-Glc-EIIA, crr; PTS system, sugar-specific IIA component [EC:2.7.1.-]	Glucose-specific phosphotransferase enzyme IIA component OS=Photobacterium damsela subsp. piscicida OX=38294 GN=BEI67_10460 PE=4 SV=1	BEI67_10460	2	-0.45376	8	IVGDGIAIK(1)PSGNK	1	5.93982e-05	77.42	1	0.00046917	58.817	1	5.93982e-05
map00010 Glycolysis / Gluconeogenesis	7.55425e-07	2.98	KFZ67_11160	120	K	K00121	frmA, ADH5, adhC; S-(hydroxymethyl)glutathione dehydrogenase / alcohol dehydrogenase [EC:1.1.1.284 1.1.1.1]	S-(hydroxymethyl)glutathione dehydrogenase OS=Photobacterium damselae OX=38293 GN=frmA PE=3 SV=1	frmA	2	-1.8535	10	ETQGK(1)GLMPDGTTR	1	0.000119643	71.781	1	0.000334127	61.409	1	0.000119643
map00010 Glycolysis / Gluconeogenesis	7.55425e-07	2.98	KFZ67_11160	323	K	K00121	frmA, ADH5, adhC; S-(hydroxymethyl)glutathione dehydrogenase / alcohol dehydrogenase [EC:1.1.1.284 1.1.1.1]	S-(hydroxymethyl)glutathione dehydrogenase OS=Photobacterium damselae OX=38293 GN=frmA PE=3 SV=1	frmA	2	-0.41474	4	GSAFGGVK(1)GR	1	1.39655e-07	113.67	1	0.000179385	90.15	1	1.39655e-07
map00010 Glycolysis / Gluconeogenesis	7.55425e-07	2.98	KFZ67_11160	107	K	K00121	frmA, ADH5, adhC; S-(hydroxymethyl)glutathione dehydrogenase / alcohol dehydrogenase [EC:1.1.1.284 1.1.1.1]	S-(hydroxymethyl)glutathione dehydrogenase OS=Photobacterium damselae OX=38293 GN=frmA PE=3 SV=1	frmA	2	0.21654	5	SGK(1)TNLCQAVR	1	3.90278e-27	151.66	1	3.90278e-27	151.66	1	2.3838e-19
map00010 Glycolysis / Gluconeogenesis	7.55425e-07	2.98	KFZ67_11160	9	K	K00121	frmA, ADH5, adhC; S-(hydroxymethyl)glutathione dehydrogenase / alcohol dehydrogenase [EC:1.1.1.284 1.1.1.1]	S-(hydroxymethyl)glutathione dehydrogenase OS=Photobacterium damselae OX=38293 GN=frmA PE=3 SV=1	frmA	3	-0.30791	5	SK(1)AAVAWGPNQPLSIEEVDVMLPR	1	1.08452e-51	135.76	1	1.57407e-33	121.38	1	1.08452e-51
map00010 Glycolysis / Gluconeogenesis	7.55425e-07	2.98	KFZ67_12730	434	K	K00873	PK, pyk; pyruvate kinase [EC:2.7.1.40]	Pyruvate kinase OS=Photobacterium damsela subsp. piscicida OX=38294 GN=pykF PE=3 SV=1	pykF	2	0.11361	2	GK(1)ELALETGLGAK	1	0.000105945	78.814	1	0.000105945	78.814	1	0.000137832
map00010 Glycolysis / Gluconeogenesis	7.55425e-07	2.98	KFZ67_12730	360	K	K00873	PK, pyk; pyruvate kinase [EC:2.7.1.40]	Pyruvate kinase OS=Photobacterium damsela subsp. piscicida OX=38294 GN=pykF PE=3 SV=1	pykF	2	1.4009	5	ITEAVCK(1)GAVDTAEK	1	1.75211e-22	131.86	1	1.75211e-22	131.86	1	1.90816e-17
map00010 Glycolysis / Gluconeogenesis	7.55425e-07	2.98	KFZ67_12730	389	K	K00873	PK, pyk; pyruvate kinase [EC:2.7.1.40]	Pyruvate kinase OS=Photobacterium damsela subsp. piscicida OX=38294 GN=pykF PE=3 SV=1	pykF	2	-1.2335	3	K(1)YFPTAR	1	4.84642e-11	133.81	1	4.84642e-11	133.81	1	2.52483e-10
map00010 Glycolysis / Gluconeogenesis	7.55425e-07	2.98	KFZ67_12730	59	K	K00873	PK, pyk; pyruvate kinase [EC:2.7.1.40]	Pyruvate kinase OS=Photobacterium damsela subsp. piscicida OX=38294 GN=pykF PE=3 SV=1	pykF	2	0.23093	3	NTGK(1)QLAILLDTK	1	0.00035064	69.516	1	0.00160987	51.03	1	0.00035064
map00010 Glycolysis / Gluconeogenesis	7.55425e-07	2.98	KFZ67_12920	223	K	K03841	FBP, fbp; fructose-1,6-bisphosphatase I [EC:3.1.3.11]	Fructose-1,6-bisphosphatase class 1 OS=Photobacterium damsela subsp. piscicida OX=38294 GN=fbp PE=3 SV=1	fbp	2	-0.01092	3	FPQGIK(1)QYIK	1	1.92789e-05	104.39	1	9.56732e-05	94.804	1	1.92789e-05
map00010 Glycolysis / Gluconeogenesis	7.55425e-07	2.98	KFZ67_12920	325	K	K03841	FBP, fbp; fructose-1,6-bisphosphatase I [EC:3.1.3.11]	Fructose-1,6-bisphosphatase class 1 OS=Photobacterium damsela subsp. piscicida OX=38294 GN=fbp PE=3 SV=1	fbp	2	-1.9314	5	NMVK(1)QVEDYLER	1	4.27257e-07	102.73	1	8.51511e-06	88.163	1	4.27257e-07
map00010 Glycolysis / Gluconeogenesis	7.55425e-07	2.98	KFZ67_12920	33	K	K03841	FBP, fbp; fructose-1,6-bisphosphatase I [EC:3.1.3.11]	Fructose-1,6-bisphosphatase class 1 OS=Photobacterium damsela subsp. piscicida OX=38294 GN=fbp PE=3 SV=1	fbp	3	-2.1513	2	QNDFPHASGELSSLLGSIK(1)LAAK	1	5.65823e-07	61.963	1	5.65823e-07	61.963	1	2.83731e-05
map00010 Glycolysis / Gluconeogenesis	7.55425e-07	2.98	KFZ67_13205	141	K	K01810	GPI, pgi; glucose-6-phosphate isomerase [EC:5.3.1.9]	Glucose-6-phosphate isomerase OS=Photobacterium damselae OX=38293 GN=pgi PE=3 SV=1	pgi	2	0.37615	4	IVSGEWK(1)GYTGK	1	0.00170536	57.792	1	0.00170536	57.792	1	0.00279747
map00010 Glycolysis / Gluconeogenesis	7.55425e-07	2.98	KFZ67_13575	367	K	K01895	ACSS1_2, acs; acetyl-CoA synthetase [EC:6.2.1.1]	Acetyl-coenzyme A synthetase OS=Photobacterium damselae OX=38293 GN=acs PE=3 SV=1	acs	2	0.10714	16	ALMAK(1)GDEAIVDTSR	1	6.73423e-22	123.76	1	6.73423e-22	123.76	1	1.50243e-18
map00010 Glycolysis / Gluconeogenesis	7.55425e-07	2.98	KFZ67_13575	640	K	K01895	ACSS1_2, acs; acetyl-CoA synthetase [EC:6.2.1.1]	Acetyl-coenzyme A synthetase OS=Photobacterium damselae OX=38293 GN=acs PE=3 SV=1	acs	3	0.2204	4	IATGDTSNLGDTSTLADPSVVEK(1)LIAEK	1	1.38514e-13	82.942	1	3.60515e-09	65.171	1	1.38514e-13
map00010 Glycolysis / Gluconeogenesis	7.55425e-07	2.98	KFZ67_13575	645	K	K01895	ACSS1_2, acs; acetyl-CoA synthetase [EC:6.2.1.1]	Acetyl-coenzyme A synthetase OS=Photobacterium damselae OX=38293 GN=acs PE=3 SV=1	acs	2	0.10552	3	LIAEK(1)QQLL	1	0.00442148	61.679	1	0.0138315	49.536	1	0.00442148
map00010 Glycolysis / Gluconeogenesis	7.55425e-07	2.98	KFZ67_13575	181	K	K01895	ACSS1_2, acs; acetyl-CoA synthetase [EC:6.2.1.1]	Acetyl-coenzyme A synthetase OS=Photobacterium damselae OX=38293 GN=acs PE=3 SV=1	acs	3	-0.031305	6	IIDSNAK(1)VVITADEGVR	1	1.38491e-08	85.421	1	1.38491e-08	85.421	1	7.93262e-08
map00010 Glycolysis / Gluconeogenesis	7.55425e-07	2.98	KFZ67_13575	585	K	K01895	ACSS1_2, acs; acetyl-CoA synthetase [EC:6.2.1.1]	Acetyl-coenzyme A synthetase OS=Photobacterium damselae OX=38293 GN=acs PE=3 SV=1	acs	3	-0.53717	2	K(1)EIGPIATPDFLHWTDALPK	1	8.15194e-07	64.843	1	8.15194e-07	64.843	1	8.46284e-07
map00010 Glycolysis / Gluconeogenesis	7.55425e-07	2.98	KFZ67_13575	617	K	K01895	ACSS1_2, acs; acetyl-CoA synthetase [EC:6.2.1.1]	Acetyl-coenzyme A synthetase OS=Photobacterium damselae OX=38293 GN=acs PE=3 SV=1	acs	3	2.0426	14	K(1)IATGDTSNLGDTSTLADPSVVEK	1	1.44189e-32	113.65	1	8.84848e-24	103.92	1	1.44189e-32
map00010 Glycolysis / Gluconeogenesis	7.55425e-07	2.98	KFZ67_13575	348	K	K01895	ACSS1_2, acs; acetyl-CoA synthetase [EC:6.2.1.1]	Acetyl-coenzyme A synthetase OS=Photobacterium damselae OX=38293 GN=acs PE=3 SV=1	acs	3	1.4901	3	MSQVVDK(1)HQVNILYTAPTAIR	1	2.27558e-10	74.364	1	8.5193e-08	72.167	1	2.27558e-10
map00020 Citrate cycle (TCA cycle)	1.6246e-05	3.06	KFZ67_01975	466	K	K00163	aceE; pyruvate dehydrogenase E1 component [EC:1.2.4.1]	Pyruvate dehydrogenase E1 component OS=Photobacterium damselae subsp. damselae OX=85581 GN=aceE PE=4 SV=1	aceE	3	-0.23359	3	DALHGYTPK(1)R	1	9.94784e-05	93.096	1	0.00140899	64.82	1	9.94784e-05
map00020 Citrate cycle (TCA cycle)	1.6246e-05	3.06	KFZ67_01975	360	K	K00163	aceE; pyruvate dehydrogenase E1 component [EC:1.2.4.1]	Pyruvate dehydrogenase E1 component OS=Photobacterium damselae subsp. damselae OX=85581 GN=aceE PE=4 SV=1	aceE	3	-1.3058	4	YPETAALVADMTDDEIFALK(1)R	1	3.65445e-07	68.952	1	9.00136e-07	62.648	1	3.65445e-07
map00020 Citrate cycle (TCA cycle)	1.6246e-05	3.06	KFZ67_01975	389	K	K00163	aceE; pyruvate dehydrogenase E1 component [EC:1.2.4.1]	Pyruvate dehydrogenase E1 component OS=Photobacterium damselae subsp. damselae OX=85581 GN=aceE PE=4 SV=1	aceE	2	0.039841	4	ETQGKPTVILAK(1)TIK	0.999998	0.000260164	65.231	0.999975	0.00226635	54.764	0.999998	0.000260164
map00020 Citrate cycle (TCA cycle)	1.6246e-05	3.06	KFZ67_01975	392	K	K00163	aceE; pyruvate dehydrogenase E1 component [EC:1.2.4.1]	Pyruvate dehydrogenase E1 component OS=Photobacterium damselae subsp. damselae OX=85581 GN=aceE PE=4 SV=1	aceE	2	0.54867	9	TIK(1)GYGMGDAAEGK	1	1.16173e-06	87.519	1	5.03359e-05	78.69	1	1.16173e-06
map00020 Citrate cycle (TCA cycle)	1.6246e-05	3.06	KFZ67_01975	509	K	K00163	aceE; pyruvate dehydrogenase E1 component [EC:1.2.4.1]	Pyruvate dehydrogenase E1 component OS=Photobacterium damselae subsp. damselae OX=85581 GN=aceE PE=4 SV=1	aceE	2	0.1758	4	ILNILLK(1)DK	1	0.000680928	85.355	1	0.00194444	74.841	1	0.000680928
map00020 Citrate cycle (TCA cycle)	1.6246e-05	3.06	KFZ67_01975	411	K	K00163	aceE; pyruvate dehydrogenase E1 component [EC:1.2.4.1]	Pyruvate dehydrogenase E1 component OS=Photobacterium damselae subsp. damselae OX=85581 GN=aceE PE=4 SV=1	aceE	4	-2.3066	7	K(1)MDMTHVQHLR	1	4.7509e-06	108.7	1	0.00011672	79.659	1	4.7509e-06
map00020 Citrate cycle (TCA cycle)	1.6246e-05	3.06	KFZ67_01975	377	K	K00163	aceE; pyruvate dehydrogenase E1 component [EC:1.2.4.1]	Pyruvate dehydrogenase E1 component OS=Photobacterium damselae subsp. damselae OX=85581 GN=aceE PE=4 SV=1	aceE	2	-4.3321	3	LFAAFNNAK(1)ETQGK	1	6.94686e-05	81.904	1	6.94686e-05	76.01	1	7.7979e-05
map00020 Citrate cycle (TCA cycle)	1.6246e-05	3.06	KFZ67_01975	872	K	K00163	aceE; pyruvate dehydrogenase E1 component [EC:1.2.4.1]	Pyruvate dehydrogenase E1 component OS=Photobacterium damselae subsp. damselae OX=85581 GN=aceE PE=4 SV=1	aceE	2	1.5299	6	SVVADAIK(1)K	1	0.00364803	63.397	1	0.00393358	61.78	1	0.00364803
map00020 Citrate cycle (TCA cycle)	1.6246e-05	3.06	KFZ67_01980	339	K	K00627	DLAT, aceF, pdhC; pyruvate dehydrogenase E2 component (dihydrolipoamide acetyltransferase) [EC:2.3.1.12]	Acetyltransferase component of pyruvate dehydrogenase complex OS=Photobacterium damselae subsp. damselae OX=85581 GN=aceF PE=3 SV=1	aceF	2	1.0038	3	EFGVNLAK(1)VK	1	0.000550774	79.148	1	0.000550774	79.148	1	0.00134743
map00020 Citrate cycle (TCA cycle)	1.6246e-05	3.06	KFZ67_01980	351	K	K00627	DLAT, aceF, pdhC; pyruvate dehydrogenase E2 component (dihydrolipoamide acetyltransferase) [EC:2.3.1.12]	Acetyltransferase component of pyruvate dehydrogenase complex OS=Photobacterium damselae subsp. damselae OX=85581 GN=aceF PE=3 SV=1	aceF	2	0.33202	3	ILK(1)EDVQNFVK	1	2.46783e-09	116.55	1	2.46783e-09	116.55	1	2.87648e-09
map00020 Citrate cycle (TCA cycle)	1.6246e-05	3.06	KFZ67_01985	256	K	K00382	DLD, lpd, pdhD; dihydrolipoamide dehydrogenase [EC:1.8.1.4]	Dihydrolipoyl dehydrogenase OS=Photobacterium damselae OX=38293 GN=lpdA PE=3 SV=1	lpdA	2	0.49886	3	EDGIYVSMEGK(1)K	1	0.000201095	75.739	1	0.000201095	75.739	1	0.00026044
map00020 Citrate cycle (TCA cycle)	1.6246e-05	3.06	KFZ67_01985	300	K	K00382	DLD, lpd, pdhD; dihydrolipoamide dehydrogenase [EC:1.8.1.4]	Dihydrolipoyl dehydrogenase OS=Photobacterium damselae OX=38293 GN=lpdA PE=3 SV=1	lpdA	2	-0.61459	7	GFIHVDK(1)QMR	1	1.1894e-07	114.97	1	0.000187872	89.679	1	1.1894e-07
map00020 Citrate cycle (TCA cycle)	1.6246e-05	3.06	KFZ67_01985	285	K	K00382	DLD, lpd, pdhD; dihydrolipoamide dehydrogenase [EC:1.8.1.4]	Dihydrolipoyl dehydrogenase OS=Photobacterium damselae OX=38293 GN=lpdA PE=3 SV=1	lpdA	2	0.00077076	3	LLDAEK(1)AGIEVDER	1	1.16173e-06	87.519	1	1.16173e-06	87.519	1	1.50465e-05
map00020 Citrate cycle (TCA cycle)	1.6246e-05	3.06	KFZ67_01985	152	K	K00382	DLD, lpd, pdhD; dihydrolipoamide dehydrogenase [EC:1.8.1.4]	Dihydrolipoyl dehydrogenase OS=Photobacterium damselae OX=38293 GN=lpdA PE=3 SV=1	lpdA	3	-0.61856	2	PIK(1)LPFIPHEDPR	1	0.000130685	73.927	1	0.000391848	65.043	1	0.000130685
map00020 Citrate cycle (TCA cycle)	1.6246e-05	3.06	KFZ67_01985	279	K	K00382	DLD, lpd, pdhD; dihydrolipoamide dehydrogenase [EC:1.8.1.4]	Dihydrolipoyl dehydrogenase OS=Photobacterium damselae OX=38293 GN=lpdA PE=3 SV=1	lpdA	2	-0.014866	6	VPNGK(1)LLDAEK	1	7.26591e-06	94.402	1	7.26591e-06	94.402	1	6.00796e-05
map00020 Citrate cycle (TCA cycle)	1.6246e-05	3.06	KFZ67_02005	387	K	K01682	acnB; aconitate hydratase 2 / 2-methylisocitrate dehydratase [EC:4.2.1.3 4.2.1.99]	Aconitate hydratase B OS=Photobacterium damselae subsp. damselae OX=85581 GN=acnB PE=3 SV=1	acnB	2	2.1684	6	GYTLAQK(1)MVGK	1	0.000309863	72.2	1	0.000309863	72.2	1	0.000468429
map00020 Citrate cycle (TCA cycle)	1.6246e-05	3.06	KFZ67_04945	236	K	K00031	IDH1, IDH2, icd; isocitrate dehydrogenase [EC:1.1.1.42]	Isocitrate dehydrogenase [NADP] OS=Photobacterium damselae OX=38293 GN=icd PE=4 SV=1	icd	2	-0.79941	7	GNIMK(1)FTEGAFK	1	7.7128e-05	82.505	1	0.000119746	80.555	1	7.7128e-05
map00020 Citrate cycle (TCA cycle)	1.6246e-05	3.06	KFZ67_04945	4	K	K00031	IDH1, IDH2, icd; isocitrate dehydrogenase [EC:1.1.1.42]	Isocitrate dehydrogenase [NADP] OS=Photobacterium damselae OX=38293 GN=icd PE=4 SV=1	icd	2	-1.5528	15	MDSK(1)VVVPVDGQK	1	5.06566e-07	94.688	1	2.3644e-06	88.163	1	5.06566e-07
map00020 Citrate cycle (TCA cycle)	1.6246e-05	3.06	KFZ67_04945	274	K	K00031	IDH1, IDH2, icd; isocitrate dehydrogenase [EC:1.1.1.42]	Isocitrate dehydrogenase [NADP] OS=Photobacterium damselae OX=38293 GN=icd PE=4 SV=1	icd	2	0.61097	3	NPNTGK(1)EIVVK	1	5.63111e-07	106.26	1	5.63111e-07	106.26	1	3.40291e-06
map00020 Citrate cycle (TCA cycle)	1.6246e-05	3.06	KFZ67_04945	56	K	K00031	IDH1, IDH2, icd; isocitrate dehydrogenase [EC:1.1.1.42]	Isocitrate dehydrogenase [NADP] OS=Photobacterium damselae OX=38293 GN=icd PE=4 SV=1	icd	2	0.5647	13	VVDAAVQK(1)AYGGDR	1	2.15272e-17	128.22	1	1.91715e-10	107.74	1	2.15272e-17
map00020 Citrate cycle (TCA cycle)	1.6246e-05	3.06	KFZ67_04945	351	K	K00031	IDH1, IDH2, icd; isocitrate dehydrogenase [EC:1.1.1.42]	Isocitrate dehydrogenase [NADP] OS=Photobacterium damselae OX=38293 GN=icd PE=4 SV=1	icd	3	0.2696	3	YAGQDK(1)VNPGSLILSAEMMLR	1	9.1815e-28	120.73	1	9.1815e-28	120.73	1	1.16609e-17
map00020 Citrate cycle (TCA cycle)	1.6246e-05	3.06	KFZ67_09945	262	K	K01902	sucD; succinyl-CoA synthetase alpha subunit [EC:6.2.1.5]	Succinate--CoA ligase [ADP-forming] subunit alpha OS=Photobacterium damselae subsp. damselae OX=85581 GN=sucD PE=3 SV=1	sucD	2	2.396	4	GTAEDK(1)FAALEAAGVR	1	7.66738e-06	70.451	1	1.19744e-05	67.646	1	7.66738e-06
map00020 Citrate cycle (TCA cycle)	1.6246e-05	3.06	KFZ67_09945	243	K	K01902	sucD; succinyl-CoA synthetase alpha subunit [EC:6.2.1.5]	Succinate--CoA ligase [ADP-forming] subunit alpha OS=Photobacterium damselae subsp. damselae OX=85581 GN=sucD PE=3 SV=1	sucD	3	0.028747	4	PVVSYIAGVTAPPGK(1)R	1	2.43283e-05	59.864	1	2.43283e-05	59.864	1	5.41189e-05
map00020 Citrate cycle (TCA cycle)	1.6246e-05	3.06	KFZ67_09945	228	K	K01902	sucD; succinyl-CoA synthetase alpha subunit [EC:6.2.1.5]	Succinate--CoA ligase [ADP-forming] subunit alpha OS=Photobacterium damselae subsp. damselae OX=85581 GN=sucD PE=3 SV=1	sucD	3	-0.51358	4	QHVTK(1)PVVSYIAGVTAPPGK	1	5.05431e-22	112.82	1	5.05431e-22	112.82	1	6.34281e-22
map00020 Citrate cycle (TCA cycle)	1.6246e-05	3.06	KFZ67_09945	7	K	K01902	sucD; succinyl-CoA synthetase alpha subunit [EC:6.2.1.5]	Succinate--CoA ligase [ADP-forming] subunit alpha OS=Photobacterium damselae subsp. damselae OX=85581 GN=sucD PE=3 SV=1	sucD	2	0.6527	3	SILINK(1)DTK	1	1.02589e-07	119.68	1	1.02589e-07	119.68	1	1.02589e-07
map00020 Citrate cycle (TCA cycle)	1.6246e-05	3.06	KFZ67_09950	380	K	K01903	sucC; succinyl-CoA synthetase beta subunit [EC:6.2.1.5]	Succinate--CoA ligase [ADP-forming] subunit beta OS=Photobacterium damselae OX=38293 GN=sucC PE=3 SV=1	sucC	3	-1.4071	3	LAESGLNIIAATSLTEAAEK(1)VVQAAEGK	1	3.00553e-35	111.4	1	3.00553e-35	111.4	1	2.43255e-26
map00020 Citrate cycle (TCA cycle)	1.6246e-05	3.06	KFZ67_09950	79	K	K01903	sucC; succinyl-CoA synthetase beta subunit [EC:6.2.1.5]	Succinate--CoA ligase [ADP-forming] subunit beta OS=Photobacterium damselae OX=38293 GN=sucC PE=3 SV=1	sucC	3	-0.12504	5	TFSQQWLGK(1)HLVTYQTDANGQPVSK	1	1.0675e-23	98.918	1	1.0675e-23	98.918	1	3.55625e-11
map00020 Citrate cycle (TCA cycle)	1.6246e-05	3.06	KFZ67_09955	287	K	K00658	DLST, sucB; 2-oxoglutarate dehydrogenase E2 component (dihydrolipoamide succinyltransferase) [EC:2.3.1.61]	Dihydrolipoyllysine-residue succinyltransferase component of 2-oxoglutarate dehydrogenase complex OS=Photobacterium damselae OX=38293 GN=BST98_09900 PE=3 SV=1	BST98_09900	2	-2.022	4	DCDK(1)LSLAEIEK	1	0.000551268	69.345	1	0.00118865	55.724	1	0.000551268
map00020 Citrate cycle (TCA cycle)	1.6246e-05	3.06	KFZ67_09955	77	K	K00658	DLST, sucB; 2-oxoglutarate dehydrogenase E2 component (dihydrolipoamide succinyltransferase) [EC:2.3.1.61]	Dihydrolipoyllysine-residue succinyltransferase component of 2-oxoglutarate dehydrogenase complex OS=Photobacterium damselae OX=38293 GN=BST98_09900 PE=3 SV=1	BST98_09900	3	-3.0246	2	LK(1)VNAVAGEPTVDVPAGAEASPNKR	1	5.87317e-17	95.153	1	5.87317e-17	95.153	0.999997	2.21644e-05
map00020 Citrate cycle (TCA cycle)	1.6246e-05	3.06	KFZ67_09955	99	K	K00658	DLST, sucB; 2-oxoglutarate dehydrogenase E2 component (dihydrolipoamide succinyltransferase) [EC:2.3.1.61]	Dihydrolipoyllysine-residue succinyltransferase component of 2-oxoglutarate dehydrogenase complex OS=Photobacterium damselae OX=38293 GN=BST98_09900 PE=3 SV=1	BST98_09900	3	-0.93464	4	VNAVAGEPTVDVPAGAEASPNK(1)R	1	4.15013e-11	81.977	1	1.31989e-10	74.192	1	4.15013e-11
map00020 Citrate cycle (TCA cycle)	1.6246e-05	3.06	KFZ67_09960	923	K	K00164	OGDH, sucA; 2-oxoglutarate dehydrogenase E1 component [EC:1.2.4.2]	2-oxoglutarate dehydrogenase E1 component OS=Photobacterium damselae OX=38293 GN=sucA PE=4 SV=1	sucA	3	-2.8372	3	PASASPAVGYMSVHLK(1)QQK	1	9.33891e-13	96.447	1	9.33891e-13	96.447	1	3.49173e-12
map00020 Citrate cycle (TCA cycle)	1.6246e-05	3.06	KFZ67_09970	267	K	K00239	sdhA, frdA; succinate dehydrogenase / fumarate reductase, flavoprotein subunit [EC:1.3.5.1 1.3.5.4]	Succinate dehydrogenase flavoprotein subunit OS=Photobacterium damselae OX=38293 GN=sdhA PE=3 SV=1	sdhA	2	-0.44072	3	GEGGYLLNK(1)DGER	1	0.00126184	54.898	1	0.00177311	49.216	1	0.00126184
map00020 Citrate cycle (TCA cycle)	1.6246e-05	3.06	KFZ67_09970	320	K	K00239	sdhA, frdA; succinate dehydrogenase / fumarate reductase, flavoprotein subunit [EC:1.3.5.1 1.3.5.4]	Succinate dehydrogenase flavoprotein subunit OS=Photobacterium damselae OX=38293 GN=sdhA PE=3 SV=1	sdhA	2	1.5562	3	LDHLGK(1)EVLESR	1	6.18548e-05	83.204	1	6.18548e-05	83.204	1	0.00015781
map00020 Citrate cycle (TCA cycle)	1.6246e-05	3.06	KFZ67_09970	124	K	K00239	sdhA, frdA; succinate dehydrogenase / fumarate reductase, flavoprotein subunit [EC:1.3.5.1 1.3.5.4]	Succinate dehydrogenase flavoprotein subunit OS=Photobacterium damselae OX=38293 GN=sdhA PE=3 SV=1	sdhA	2	0.056288	3	PFGGQSK(1)EFGGEQAAR	1	2.13975e-08	90.348	1	8.05754e-06	70.197	1	2.13975e-08
map00020 Citrate cycle (TCA cycle)	1.6246e-05	3.06	KFZ67_09970	281	K	K00239	sdhA, frdA; succinate dehydrogenase / fumarate reductase, flavoprotein subunit [EC:1.3.5.1 1.3.5.4]	Succinate dehydrogenase flavoprotein subunit OS=Photobacterium damselae OX=38293 GN=sdhA PE=3 SV=1	sdhA	2	-1.3261	3	YAPNAK(1)DLAGR	1	0.00210855	59.265	1	0.00210855	59.265	1	0.00361625
map00020 Citrate cycle (TCA cycle)	1.6246e-05	3.06	KFZ67_09985	103	K	K01647	CS, gltA; citrate synthase [EC:2.3.3.1]	Citrate synthase OS=Photobacterium damselae OX=38293 GN=gltA PE=3 SV=1	gltA	2	0.047713	3	AEYEK(1)FR	1	0.000224622	107.32	1	0.000224622	107.32	1	0.000448139
map00020 Citrate cycle (TCA cycle)	1.6246e-05	3.06	KFZ67_09985	293	K	K01647	CS, gltA; citrate synthase [EC:2.3.3.1]	Citrate synthase OS=Photobacterium damselae OX=38293 GN=gltA PE=3 SV=1	gltA	3	-0.63837	3	AK(1)DKDDPFR	1	5.99189e-17	139.39	0.999836	8.26491e-05	98.254	1	5.99189e-17
map00020 Citrate cycle (TCA cycle)	1.6246e-05	3.06	KFZ67_09985	222	K	K01647	CS, gltA; citrate synthase [EC:2.3.3.1]	Citrate synthase OS=Photobacterium damselae OX=38293 GN=gltA PE=3 SV=1	gltA	3	1.6511	4	ALDK(1)IFILHADHEQNASTSTVR	1	2.35004e-29	122.35	1	2.35004e-29	122.35	1	2.28984e-22
map00020 Citrate cycle (TCA cycle)	1.6246e-05	3.06	KFZ67_12890	142	K	K00024	mdh; malate dehydrogenase [EC:1.1.1.37]	Malate dehydrogenase OS=Photobacterium damselae subsp. damselae OX=85581 GN=mdh PE=3 SV=1	mdh	2	-2.2154	3	K(1)LFGITTLDVIR	1	1.83179e-27	149.23	1	1.83179e-27	149.23	1	4.2682e-20
map00020 Citrate cycle (TCA cycle)	1.6246e-05	3.06	KFZ67_12890	162	K	K00024	mdh; malate dehydrogenase [EC:1.1.1.37]	Malate dehydrogenase OS=Photobacterium damselae subsp. damselae OX=85581 GN=mdh PE=3 SV=1	mdh	2	0.97471	3	SETFVAELK(1)GK	1	0.000294285	75.819	1	0.00106502	66.267	1	0.000294285
map00020 Citrate cycle (TCA cycle)	1.6246e-05	3.06	KFZ67_12890	21	K	K00024	mdh; malate dehydrogenase [EC:1.1.1.37]	Malate dehydrogenase OS=Photobacterium damselae subsp. damselae OX=85581 GN=mdh PE=3 SV=1	mdh	3	-0.24109	3	VAVIGAAGGIGQALALLLK(1)NR	1	2.19203e-53	148.41	1	2.23028e-27	118.31	1	2.19203e-53
map00020 Citrate cycle (TCA cycle)	1.6246e-05	3.06	KFZ67_13470	258	K	K00244	frdA; fumarate reductase flavoprotein subunit [EC:1.3.5.4]	Fumarate reductase flavoprotein subunit OS=Photobacterium damselae OX=38293 GN=CTM90_17535 PE=3 SV=1	CTM90_17535	2	-1.6945	6	GEGGIIVNK(1)NGYR	1	2.09353e-12	111.52	1	0.00033581	72.29	1	2.09353e-12
map00020 Citrate cycle (TCA cycle)	1.6246e-05	3.06	KFZ67_13470	591	K	K00244	frdA; fumarate reductase flavoprotein subunit [EC:1.3.5.4]	Fumarate reductase flavoprotein subunit OS=Photobacterium damselae OX=38293 GN=CTM90_17535 PE=3 SV=1	CTM90_17535	3	0.13956	2	LYGAAAEEAAAK(1)EAAEQQEK	1	3.54712e-10	78.78	1	3.41824e-07	69.422	1	3.54712e-10
map00020 Citrate cycle (TCA cycle)	1.6246e-05	3.06	KFZ67_15635	179	K	K01679	E4.2.1.2B, fumC, FH; fumarate hydratase, class II [EC:4.2.1.2]	Fumarate hydratase class II OS=Photobacterium damselae OX=38293 GN=aspA PE=3 SV=1	aspA	3	-0.39316	2	AIGHIVK(1)TGR	1	0.00190143	60.167	1	0.00345384	55.806	1	0.00190143
map00030 Pentose phosphate pathway	0.0115234	2.09	KFZ67_00835	215	K	K00850	pfkA, PFK; 6-phosphofructokinase 1 [EC:2.7.1.11]	ATP-dependent 6-phosphofructokinase OS=Photobacterium damselae OX=38293 GN=pfkA PE=3 SV=1	pfkA	3	1.7226	3	K(1)HAIIAITELMTDVNELAK	1	2.59634e-12	94.281	1	8.68522e-12	85.937	1	2.59634e-12
map00030 Pentose phosphate pathway	0.0115234	2.09	KFZ67_02335	72	K	K01624	FBA, fbaA; fructose-bisphosphate aldolase, class II [EC:4.1.2.13]	Fructose-bisphosphate aldolase OS=Photobacterium damselae OX=38293 GN=fbaA PE=3 SV=1	fbaA	3	2.129	2	APVIVQFSNGGAAFFAGK(1)GLK	1	9.91832e-36	133.94	1	3.94466e-35	131.67	1	9.91832e-36
map00030 Pentose phosphate pathway	0.0115234	2.09	KFZ67_02335	75	K	K01624	FBA, fbaA; fructose-bisphosphate aldolase, class II [EC:4.1.2.13]	Fructose-bisphosphate aldolase OS=Photobacterium damselae OX=38293 GN=fbaA PE=3 SV=1	fbaA	2	1.6554	6	GLK(1)LEGQEAQIK	1	8.87281e-06	87.719	1	0.00424577	63.091	1	8.87281e-06
map00030 Pentose phosphate pathway	0.0115234	2.09	KFZ67_02335	29	K	K01624	FBA, fbaA; fructose-bisphosphate aldolase, class II [EC:4.1.2.13]	Fructose-bisphosphate aldolase OS=Photobacterium damselae OX=38293 GN=fbaA PE=3 SV=1	fbaA	3	-1.3666	2	ENK(1)FALPAVNVVNTDTINGVLEAAAK	1	1.71893e-11	80.02	1	1.71893e-11	80.02	1	1.01532e-07
map00030 Pentose phosphate pathway	0.0115234	2.09	KFZ67_02335	325	K	K01624	FBA, fbaA; fructose-bisphosphate aldolase, class II [EC:4.1.2.13]	Fructose-bisphosphate aldolase OS=Photobacterium damselae OX=38293 GN=fbaA PE=3 SV=1	fbaA	3	-0.39934	10	KFEAENHDYLQGQIGNPTGPDAPNK(1)K	1	1.11269e-42	130.98	1	9.16463e-33	114.75	1	1.11269e-42
map00030 Pentose phosphate pathway	0.0115234	2.09	KFZ67_02335	84	K	K01624	FBA, fbaA; fructose-bisphosphate aldolase, class II [EC:4.1.2.13]	Fructose-bisphosphate aldolase OS=Photobacterium damselae OX=38293 GN=fbaA PE=3 SV=1	fbaA	2	0.40311	5	LEGQEAQIK(1)GAVAGAK	1	9.57618e-09	94.487	1	9.57618e-09	94.487	1	2.26457e-08
map00030 Pentose phosphate pathway	0.0115234	2.09	KFZ67_02335	20	K	K01624	FBA, fbaA; fructose-bisphosphate aldolase, class II [EC:4.1.2.13]	Fructose-bisphosphate aldolase OS=Photobacterium damselae OX=38293 GN=fbaA PE=3 SV=1	fbaA	3	0.52701	5	IFDFVKPGVISGDDVQK(1)VFEVAK	1	4.81435e-22	107.21	0.999677	5.6263e-07	64.749	1	4.81435e-22
map00030 Pentose phosphate pathway	0.0115234	2.09	KFZ67_02335	26	K	K01624	FBA, fbaA; fructose-bisphosphate aldolase, class II [EC:4.1.2.13]	Fructose-bisphosphate aldolase OS=Photobacterium damselae OX=38293 GN=fbaA PE=3 SV=1	fbaA	2	1.0733	6	VFEVAK(1)ENK	1	1.00106e-07	119.75	1	1.00106e-07	119.75	1	3.84516e-05
map00030 Pentose phosphate pathway	0.0115234	2.09	KFZ67_02335	301	K	K01624	FBA, fbaA; fructose-bisphosphate aldolase, class II [EC:4.1.2.13]	Fructose-bisphosphate aldolase OS=Photobacterium damselae OX=38293 GN=fbaA PE=3 SV=1	fbaA	3	0.21001	8	K(1)FEAENHDYLQGQIGNPTGPDAPNK	1	2.10236e-16	86.18	1	1.18301e-07	69.284	1	2.10236e-16
map00030 Pentose phosphate pathway	0.0115234	2.09	KFZ67_02335	113	K	K01624	FBA, fbaA; fructose-bisphosphate aldolase, class II [EC:4.1.2.13]	Fructose-bisphosphate aldolase OS=Photobacterium damselae OX=38293 GN=fbaA PE=3 SV=1	fbaA	5	-0.76607	13	YVHAIAETYGVPVILHTDHAAK(1)K	1	1.63571e-44	136.49	1	3.60001e-35	122.94	1	1.63571e-44
map00030 Pentose phosphate pathway	0.0115234	2.09	KFZ67_02360	8	K	K01807	rpiA; ribose 5-phosphate isomerase A [EC:5.3.1.6]	Ribose-5-phosphate isomerase A OS=Photobacterium damselae OX=38293 GN=rpiA PE=3 SV=1	rpiA	2	0.91171	3	K(1)AAGWAALEYVK	1	0.00172073	56.569	1	0.00289524	49.269	1	0.00172073
map00030 Pentose phosphate pathway	0.0115234	2.09	KFZ67_03710	111	K	K00948	PRPS, prsA; ribose-phosphate pyrophosphokinase [EC:2.7.6.1]	Ribose-phosphate pyrophosphokinase OS=Photobacterium damselae OX=38293 GN=prs PE=3 SV=1	prs	3	-1.0229	4	VPITAK(1)VVADFLSNVGVDR	1	5.99068e-16	103.41	1	5.99068e-16	103.41	1	6.72431e-16
map00030 Pentose phosphate pathway	0.0115234	2.09	KFZ67_10005	273	K	K01835	pgm; phosphoglucomutase [EC:5.4.2.2]	Phosphoglucomutase, alpha-D-glucose phosphate-specific OS=Photobacterium damselae OX=38293 GN=BST98_09950 PE=3 SV=1	BST98_09950	2	1.1601	6	FMSLDK(1)DGVIR	1	0.00024225	77.674	1	0.00597825	50.354	1	0.00024225
map00030 Pentose phosphate pathway	0.0115234	2.09	KFZ67_10005	525	K	K01835	pgm; phosphoglucomutase [EC:5.4.2.2]	Phosphoglucomutase, alpha-D-glucose phosphate-specific OS=Photobacterium damselae OX=38293 GN=BST98_09950 PE=3 SV=1	BST98_09950	3	0.084306	3	GK(1)EHLALIEK	1	0.000584808	73.435	1	0.000764397	71.176	1	0.000584808
map00030 Pentose phosphate pathway	0.0115234	2.09	KFZ67_11825	166	K	K01619	deoC, DERA; deoxyribose-phosphate aldolase [EC:4.1.2.4]	Deoxyribose-phosphate aldolase OS=Photobacterium damsela subsp. piscicida OX=38294 GN=deoC PE=3 SV=1	deoC	2	0.91656	3	AGADFIK(1)TSTGK	1	0.00279747	51.726	1	0.00719204	44.511	1	0.00279747
map00030 Pentose phosphate pathway	0.0115234	2.09	KFZ67_11825	37	K	K01619	deoC, DERA; deoxyribose-phosphate aldolase [EC:4.1.2.4]	Deoxyribose-phosphate aldolase OS=Photobacterium damsela subsp. piscicida OX=38294 GN=deoC PE=3 SV=1	deoC	3	-0.3992	3	NAK(1)TAVGNTAAVCIYPR	1	2.62499e-29	137.17	1	2.62499e-29	137.17	1	7.24908e-23
map00030 Pentose phosphate pathway	0.0115234	2.09	KFZ67_11825	126	K	K01619	deoC, DERA; deoxyribose-phosphate aldolase [EC:4.1.2.4]	Deoxyribose-phosphate aldolase OS=Photobacterium damsela subsp. piscicida OX=38294 GN=deoC PE=3 SV=1	deoC	2	-0.85709	2	QCK(1)AACGDNVQLK	1	3.36888e-05	83.54	1	3.36888e-05	83.54	1	0.00075333
map00030 Pentose phosphate pathway	0.0115234	2.09	KFZ67_12920	223	K	K03841	FBP, fbp; fructose-1,6-bisphosphatase I [EC:3.1.3.11]	Fructose-1,6-bisphosphatase class 1 OS=Photobacterium damsela subsp. piscicida OX=38294 GN=fbp PE=3 SV=1	fbp	2	-0.01092	3	FPQGIK(1)QYIK	1	1.92789e-05	104.39	1	9.56732e-05	94.804	1	1.92789e-05
map00030 Pentose phosphate pathway	0.0115234	2.09	KFZ67_12920	325	K	K03841	FBP, fbp; fructose-1,6-bisphosphatase I [EC:3.1.3.11]	Fructose-1,6-bisphosphatase class 1 OS=Photobacterium damsela subsp. piscicida OX=38294 GN=fbp PE=3 SV=1	fbp	2	-1.9314	5	NMVK(1)QVEDYLER	1	4.27257e-07	102.73	1	8.51511e-06	88.163	1	4.27257e-07
map00030 Pentose phosphate pathway	0.0115234	2.09	KFZ67_12920	33	K	K03841	FBP, fbp; fructose-1,6-bisphosphatase I [EC:3.1.3.11]	Fructose-1,6-bisphosphatase class 1 OS=Photobacterium damsela subsp. piscicida OX=38294 GN=fbp PE=3 SV=1	fbp	3	-2.1513	2	QNDFPHASGELSSLLGSIK(1)LAAK	1	5.65823e-07	61.963	1	5.65823e-07	61.963	1	2.83731e-05
map00030 Pentose phosphate pathway	0.0115234	2.09	KFZ67_13205	141	K	K01810	GPI, pgi; glucose-6-phosphate isomerase [EC:5.3.1.9]	Glucose-6-phosphate isomerase OS=Photobacterium damselae OX=38293 GN=pgi PE=3 SV=1	pgi	2	0.37615	4	IVSGEWK(1)GYTGK	1	0.00170536	57.792	1	0.00170536	57.792	1	0.00279747
map00030 Pentose phosphate pathway	0.0115234	2.09	KFZ67_17960	243	K	K00615	E2.2.1.1, tktA, tktB; transketolase [EC:2.2.1.1]	Transketolase OS=Photobacterium damselae OX=38293 GN=tkt PE=3 SV=1	tkt	3	-0.54468	4	ADTTRPTLICCK(1)TIIGFGSPNK	1	1.47338e-10	67.895	1	1.47338e-10	65.833	1	4.51088e-07
map00030 Pentose phosphate pathway	0.0115234	2.09	KFZ67_17965	315	K	K00616	E2.2.1.2, talA, talB; transaldolase [EC:2.2.1.2]	Transaldolase OS=Photobacterium damselae OX=38293 GN=tal PE=3 SV=1	tal	2	-0.22748	2	LETMIAEK(1)L	1	0.0237298	44.349	1	0.0237298	44.349	1	0.0309347
map00030 Pentose phosphate pathway	0.0115234	2.09	KFZ67_17965	269	K	K00616	E2.2.1.2, talA, talB; transaldolase [EC:2.2.1.2]	Transaldolase OS=Photobacterium damselae OX=38293 GN=tal PE=3 SV=1	tal	2	-0.17267	3	LLPATEVK(1)AR	1	1.09638e-08	121.73	1	4.03992e-05	98.048	1	1.09638e-08
map00030 Pentose phosphate pathway	0.0115234	2.09	KFZ67_17965	4	K	K00616	E2.2.1.2, talA, talB; transaldolase [EC:2.2.1.2]	Transaldolase OS=Photobacterium damselae OX=38293 GN=tal PE=3 SV=1	tal	2	-1.0554	3	STK(1)LEQLR	1	0.000936256	89.698	1	0.00610738	72.23	1	0.000936256
map00051 Fructose and mannose metabolism	0.0287839	2.32	KFZ67_00835	215	K	K00850	pfkA, PFK; 6-phosphofructokinase 1 [EC:2.7.1.11]	ATP-dependent 6-phosphofructokinase OS=Photobacterium damselae OX=38293 GN=pfkA PE=3 SV=1	pfkA	3	1.7226	3	K(1)HAIIAITELMTDVNELAK	1	2.59634e-12	94.281	1	8.68522e-12	85.937	1	2.59634e-12
map00051 Fructose and mannose metabolism	0.0287839	2.32	KFZ67_00840	11	K	K01803	TPI, tpiA; triosephosphate isomerase (TIM) [EC:5.3.1.1]	Triosephosphate isomerase OS=Photobacterium damselae OX=38293 GN=tpiA PE=3 SV=1	tpiA	2	1.236	7	HPVVMGNWK(1)LNGSK	1	4.98702e-13	116.63	1	8.79917e-05	73.415	1	4.98702e-13
map00051 Fructose and mannose metabolism	0.0287839	2.32	KFZ67_02335	72	K	K01624	FBA, fbaA; fructose-bisphosphate aldolase, class II [EC:4.1.2.13]	Fructose-bisphosphate aldolase OS=Photobacterium damselae OX=38293 GN=fbaA PE=3 SV=1	fbaA	3	2.129	2	APVIVQFSNGGAAFFAGK(1)GLK	1	9.91832e-36	133.94	1	3.94466e-35	131.67	1	9.91832e-36
map00051 Fructose and mannose metabolism	0.0287839	2.32	KFZ67_02335	75	K	K01624	FBA, fbaA; fructose-bisphosphate aldolase, class II [EC:4.1.2.13]	Fructose-bisphosphate aldolase OS=Photobacterium damselae OX=38293 GN=fbaA PE=3 SV=1	fbaA	2	1.6554	6	GLK(1)LEGQEAQIK	1	8.87281e-06	87.719	1	0.00424577	63.091	1	8.87281e-06
map00051 Fructose and mannose metabolism	0.0287839	2.32	KFZ67_02335	29	K	K01624	FBA, fbaA; fructose-bisphosphate aldolase, class II [EC:4.1.2.13]	Fructose-bisphosphate aldolase OS=Photobacterium damselae OX=38293 GN=fbaA PE=3 SV=1	fbaA	3	-1.3666	2	ENK(1)FALPAVNVVNTDTINGVLEAAAK	1	1.71893e-11	80.02	1	1.71893e-11	80.02	1	1.01532e-07
map00051 Fructose and mannose metabolism	0.0287839	2.32	KFZ67_02335	325	K	K01624	FBA, fbaA; fructose-bisphosphate aldolase, class II [EC:4.1.2.13]	Fructose-bisphosphate aldolase OS=Photobacterium damselae OX=38293 GN=fbaA PE=3 SV=1	fbaA	3	-0.39934	10	KFEAENHDYLQGQIGNPTGPDAPNK(1)K	1	1.11269e-42	130.98	1	9.16463e-33	114.75	1	1.11269e-42
map00051 Fructose and mannose metabolism	0.0287839	2.32	KFZ67_02335	84	K	K01624	FBA, fbaA; fructose-bisphosphate aldolase, class II [EC:4.1.2.13]	Fructose-bisphosphate aldolase OS=Photobacterium damselae OX=38293 GN=fbaA PE=3 SV=1	fbaA	2	0.40311	5	LEGQEAQIK(1)GAVAGAK	1	9.57618e-09	94.487	1	9.57618e-09	94.487	1	2.26457e-08
map00051 Fructose and mannose metabolism	0.0287839	2.32	KFZ67_02335	20	K	K01624	FBA, fbaA; fructose-bisphosphate aldolase, class II [EC:4.1.2.13]	Fructose-bisphosphate aldolase OS=Photobacterium damselae OX=38293 GN=fbaA PE=3 SV=1	fbaA	3	0.52701	5	IFDFVKPGVISGDDVQK(1)VFEVAK	1	4.81435e-22	107.21	0.999677	5.6263e-07	64.749	1	4.81435e-22
map00051 Fructose and mannose metabolism	0.0287839	2.32	KFZ67_02335	26	K	K01624	FBA, fbaA; fructose-bisphosphate aldolase, class II [EC:4.1.2.13]	Fructose-bisphosphate aldolase OS=Photobacterium damselae OX=38293 GN=fbaA PE=3 SV=1	fbaA	2	1.0733	6	VFEVAK(1)ENK	1	1.00106e-07	119.75	1	1.00106e-07	119.75	1	3.84516e-05
map00051 Fructose and mannose metabolism	0.0287839	2.32	KFZ67_02335	301	K	K01624	FBA, fbaA; fructose-bisphosphate aldolase, class II [EC:4.1.2.13]	Fructose-bisphosphate aldolase OS=Photobacterium damselae OX=38293 GN=fbaA PE=3 SV=1	fbaA	3	0.21001	8	K(1)FEAENHDYLQGQIGNPTGPDAPNK	1	2.10236e-16	86.18	1	1.18301e-07	69.284	1	2.10236e-16
map00051 Fructose and mannose metabolism	0.0287839	2.32	KFZ67_02335	113	K	K01624	FBA, fbaA; fructose-bisphosphate aldolase, class II [EC:4.1.2.13]	Fructose-bisphosphate aldolase OS=Photobacterium damselae OX=38293 GN=fbaA PE=3 SV=1	fbaA	5	-0.76607	13	YVHAIAETYGVPVILHTDHAAK(1)K	1	1.63571e-44	136.49	1	3.60001e-35	122.94	1	1.63571e-44
map00051 Fructose and mannose metabolism	0.0287839	2.32	KFZ67_06640	269	K	K02768	PTS-Fru-EIIA, fruB; PTS system, fructose-specific IIA component [EC:2.7.1.202]	Bifunctional PTS fructose transporter subunit IIA/HPr protein OS=Photobacterium damselae OX=38293 GN=BST98_06695 PE=4 SV=1	BST98_06695	2	-0.87551	3	IAELLASSEDK(1)VR	1	0.000541684	65.043	1	0.000541684	65.043	1	0.000541684
map00051 Fructose and mannose metabolism	0.0287839	2.32	KFZ67_06650	234	K	K02770	PTS-Fru-EIIC, fruA; PTS system, fructose-specific IIC component	PTS fructose transporter subunit EIIBC OS=Photobacterium damselae OX=38293 GN=BST98_06705 PE=4 SV=1	BST98_06705	3	0.47827	3	AFATATTYQQDAANSTAETK(1)EEK	1	2.42402e-07	68.42	1	0.000329538	43.841	1	2.42402e-07
map00051 Fructose and mannose metabolism	0.0287839	2.32	KFZ67_06650	76	K	K02770	PTS-Fru-EIIC, fruA; PTS system, fructose-specific IIC component	PTS fructose transporter subunit EIIBC OS=Photobacterium damselae OX=38293 GN=BST98_06705 PE=4 SV=1	BST98_06705	3	-0.295	3	K(1)VYVADIADCFENTK	1	7.39663e-06	71.935	1	7.39663e-06	71.935	1	2.85398e-05
map00051 Fructose and mannose metabolism	0.0287839	2.32	KFZ67_06650	198	K	K02770	PTS-Fru-EIIC, fruA; PTS system, fructose-specific IIC component	PTS fructose transporter subunit EIIBC OS=Photobacterium damselae OX=38293 GN=BST98_06705 PE=4 SV=1	BST98_06705	2	1.1141	3	LYK(1)TSTGAALK	1	0.000153618	80.834	1	0.00210855	59.265	1	0.000153618
map00051 Fructose and mannose metabolism	0.0287839	2.32	KFZ67_12920	223	K	K03841	FBP, fbp; fructose-1,6-bisphosphatase I [EC:3.1.3.11]	Fructose-1,6-bisphosphatase class 1 OS=Photobacterium damsela subsp. piscicida OX=38294 GN=fbp PE=3 SV=1	fbp	2	-0.01092	3	FPQGIK(1)QYIK	1	1.92789e-05	104.39	1	9.56732e-05	94.804	1	1.92789e-05
map00051 Fructose and mannose metabolism	0.0287839	2.32	KFZ67_12920	325	K	K03841	FBP, fbp; fructose-1,6-bisphosphatase I [EC:3.1.3.11]	Fructose-1,6-bisphosphatase class 1 OS=Photobacterium damsela subsp. piscicida OX=38294 GN=fbp PE=3 SV=1	fbp	2	-1.9314	5	NMVK(1)QVEDYLER	1	4.27257e-07	102.73	1	8.51511e-06	88.163	1	4.27257e-07
map00051 Fructose and mannose metabolism	0.0287839	2.32	KFZ67_12920	33	K	K03841	FBP, fbp; fructose-1,6-bisphosphatase I [EC:3.1.3.11]	Fructose-1,6-bisphosphatase class 1 OS=Photobacterium damsela subsp. piscicida OX=38294 GN=fbp PE=3 SV=1	fbp	3	-2.1513	2	QNDFPHASGELSSLLGSIK(1)LAAK	1	5.65823e-07	61.963	1	5.65823e-07	61.963	1	2.83731e-05
map00061 Fatty acid biosynthesis	0.159185	1.59	KFZ67_03145	136	K	K01962	accA; acetyl-CoA carboxylase carboxyl transferase subunit alpha [EC:6.4.1.2 2.1.3.15]	Acetyl-coenzyme A carboxylase carboxyl transferase subunit alpha OS=Photobacterium damselae subsp. damselae OX=85581 GN=accA PE=3 SV=1	accA	2	-0.23154	2	NFGMPK(1)PEGYR	1	0.000148501	81.017	1	0.000148501	81.017	1	0.000991815
map00061 Fatty acid biosynthesis	0.159185	1.59	KFZ67_04275	10	K	K01963	accD; acetyl-CoA carboxylase carboxyl transferase subunit beta [EC:6.4.1.2 2.1.3.15]	Acetyl-coenzyme A carboxylase carboxyl transferase subunit beta OS=Photobacterium damselae subsp. damselae OX=85581 GN=accD PE=3 SV=1	accD	2	0.1021	3	ILTK(1)SNIVTSR	1	1.12446e-09	119.74	1	9.70305e-07	103.43	1	1.12446e-09
map00061 Fatty acid biosynthesis	0.159185	1.59	KFZ67_05140	286	K	K00645	fabD, MCAT, MCT1; [acyl-carrier-protein] S-malonyltransferase [EC:2.3.1.39]	Malonyl CoA-acyl carrier protein transacylase OS=Photobacterium damselae OX=38293 GN=BST98_05170 PE=3 SV=1	BST98_05170	2	0.57701	3	VLTGLTK(1)R	1	0.0295218	56.434	1	0.0338837	51.113	1	0.0295218
map00061 Fatty acid biosynthesis	0.159185	1.59	KFZ67_06020	42	K	K00209	fabV, ter; enoyl-[acyl-carrier protein] reductase / trans-2-enoyl-CoA reductase (NAD+) [EC:1.3.1.9 1.3.1.44]	Enoyl-[acyl-carrier-protein] reductase [NADH] OS=Photobacterium damselae OX=38293 GN=fabV PE=3 SV=1	fabV	2	-1.0306	3	AQGPIANAPK(1)R	1	1.23408e-06	100.58	1	1.55546e-05	88.056	1	1.23408e-06
map00061 Fatty acid biosynthesis	0.159185	1.59	KFZ67_06020	118	K	K00209	fabV, ter; enoyl-[acyl-carrier protein] reductase / trans-2-enoyl-CoA reductase (NAD+) [EC:1.3.1.9 1.3.1.44]	Enoyl-[acyl-carrier-protein] reductase [NADH] OS=Photobacterium damselae OX=38293 GN=fabV PE=3 SV=1	fabV	2	-1.2581	5	SLNGDAFSNEAK(1)QK	1	0.000367668	60.55	1	0.000367668	60.55	1	0.000650333
map00061 Fatty acid biosynthesis	0.159185	1.59	KFZ67_07330	122	K	K01716	fabA; 3-hydroxyacyl-[acyl-carrier protein] dehydratase / trans-2-decenoyl-[acyl-carrier protein] isomerase [EC:4.2.1.59 5.3.3.14]	3-hydroxydecanoyl-[acyl-carrier-protein] dehydratase OS=Photobacterium damselae OX=38293 GN=fabA PE=3 SV=1	fabA	2	-0.34485	4	FTGQILPTAK(1)K	1	0.000322766	73.435	1	0.000322766	73.435	1	0.000322766
map00061 Fatty acid biosynthesis	0.159185	1.59	KFZ67_15870	408	K	K18473	fabY; acetoacetyl-[acyl-carrier protein] synthase [EC:2.3.1.180]	3-oxoacyl-[acyl-carrier-protein] synthase 2 OS=Photobacterium damselae OX=38293 GN=fabF_2 PE=3 SV=1	fabF_2	3	-0.0035625	2	AILGAEGVK(1)QTYVQSHGTGTPQNR	1	2.30596e-07	67.11	1	2.30596e-07	67.11	1	2.30596e-07
map00071 Fatty acid degradation	0.549853	1.08	KFZ67_09505	28	K	K00626	E2.3.1.9, atoB; acetyl-CoA C-acetyltransferase [EC:2.3.1.9]	Acetyl-CoA C-acetyltransferase OS=Photobacterium damselae OX=38293 GN=CTM90_05090 PE=3 SV=1	CTM90_05090	2	-0.19634	3	DQAAGK(1)IAAEVIK	1	0.00072526	60.861	1	0.000903038	58.885	1	0.00072526
map00071 Fatty acid degradation	0.549853	1.08	KFZ67_09505	345	K	K00626	E2.3.1.9, atoB; acetyl-CoA C-acetyltransferase [EC:2.3.1.9]	Acetyl-CoA C-acetyltransferase OS=Photobacterium damselae OX=38293 GN=CTM90_05090 PE=3 SV=1	CTM90_05090	4	1.9422	4	HQVEASDIIAK(1)ANLNGGAIALGHPLGASGNR	1	4.73063e-14	82.91	1	1.28533e-13	78.383	1	4.73063e-14
map00071 Fatty acid degradation	0.549853	1.08	KFZ67_09505	10	K	K00626	E2.3.1.9, atoB; acetyl-CoA C-acetyltransferase [EC:2.3.1.9]	Acetyl-CoA C-acetyltransferase OS=Photobacterium damselae OX=38293 GN=CTM90_05090 PE=3 SV=1	CTM90_05090	2	0.69125	6	VFIVAAK(1)R	1	7.27634e-17	143	1	3.68027e-11	128.57	1	7.27634e-17
map00071 Fatty acid degradation	0.549853	1.08	KFZ67_10375	366	K	K01782	fadJ; 3-hydroxyacyl-CoA dehydrogenase / enoyl-CoA hydratase / 3-hydroxybutyryl-CoA epimerase [EC:1.1.1.35 4.2.1.17 5.1.2.3]	Fatty acid oxidation complex subunit alpha OS=Photobacterium damselae OX=38293 GN=BST98_10320 PE=3 SV=1	BST98_10320	2	-0.46309	3	IISK(1)AQLQK	1	0.000320728	92.838	1	0.00155125	78.113	1	0.000320728
map00071 Fatty acid degradation	0.549853	1.08	KFZ67_10375	232	K	K01782	fadJ; 3-hydroxyacyl-CoA dehydrogenase / enoyl-CoA hydratase / 3-hydroxybutyryl-CoA epimerase [EC:1.1.1.35 4.2.1.17 5.1.2.3]	Fatty acid oxidation complex subunit alpha OS=Photobacterium damselae OX=38293 GN=BST98_10320 PE=3 SV=1	BST98_10320	2	0.50631	3	SVVFDQAK(1)K	1	0.00393358	61.78	1	0.00484429	59.908	1	0.00393358
map00071 Fatty acid degradation	0.549853	1.08	KFZ67_11160	120	K	K00121	frmA, ADH5, adhC; S-(hydroxymethyl)glutathione dehydrogenase / alcohol dehydrogenase [EC:1.1.1.284 1.1.1.1]	S-(hydroxymethyl)glutathione dehydrogenase OS=Photobacterium damselae OX=38293 GN=frmA PE=3 SV=1	frmA	2	-1.8535	10	ETQGK(1)GLMPDGTTR	1	0.000119643	71.781	1	0.000334127	61.409	1	0.000119643
map00071 Fatty acid degradation	0.549853	1.08	KFZ67_11160	323	K	K00121	frmA, ADH5, adhC; S-(hydroxymethyl)glutathione dehydrogenase / alcohol dehydrogenase [EC:1.1.1.284 1.1.1.1]	S-(hydroxymethyl)glutathione dehydrogenase OS=Photobacterium damselae OX=38293 GN=frmA PE=3 SV=1	frmA	2	-0.41474	4	GSAFGGVK(1)GR	1	1.39655e-07	113.67	1	0.000179385	90.15	1	1.39655e-07
map00071 Fatty acid degradation	0.549853	1.08	KFZ67_11160	107	K	K00121	frmA, ADH5, adhC; S-(hydroxymethyl)glutathione dehydrogenase / alcohol dehydrogenase [EC:1.1.1.284 1.1.1.1]	S-(hydroxymethyl)glutathione dehydrogenase OS=Photobacterium damselae OX=38293 GN=frmA PE=3 SV=1	frmA	2	0.21654	5	SGK(1)TNLCQAVR	1	3.90278e-27	151.66	1	3.90278e-27	151.66	1	2.3838e-19
map00071 Fatty acid degradation	0.549853	1.08	KFZ67_11160	9	K	K00121	frmA, ADH5, adhC; S-(hydroxymethyl)glutathione dehydrogenase / alcohol dehydrogenase [EC:1.1.1.284 1.1.1.1]	S-(hydroxymethyl)glutathione dehydrogenase OS=Photobacterium damselae OX=38293 GN=frmA PE=3 SV=1	frmA	3	-0.30791	5	SK(1)AAVAWGPNQPLSIEEVDVMLPR	1	1.08452e-51	135.76	1	1.57407e-33	121.38	1	1.08452e-51
map00072 Synthesis and degradation of ketone bodies	0.199206	5.02	KFZ67_09505	28	K	K00626	E2.3.1.9, atoB; acetyl-CoA C-acetyltransferase [EC:2.3.1.9]	Acetyl-CoA C-acetyltransferase OS=Photobacterium damselae OX=38293 GN=CTM90_05090 PE=3 SV=1	CTM90_05090	2	-0.19634	3	DQAAGK(1)IAAEVIK	1	0.00072526	60.861	1	0.000903038	58.885	1	0.00072526
map00072 Synthesis and degradation of ketone bodies	0.199206	5.02	KFZ67_09505	345	K	K00626	E2.3.1.9, atoB; acetyl-CoA C-acetyltransferase [EC:2.3.1.9]	Acetyl-CoA C-acetyltransferase OS=Photobacterium damselae OX=38293 GN=CTM90_05090 PE=3 SV=1	CTM90_05090	4	1.9422	4	HQVEASDIIAK(1)ANLNGGAIALGHPLGASGNR	1	4.73063e-14	82.91	1	1.28533e-13	78.383	1	4.73063e-14
map00072 Synthesis and degradation of ketone bodies	0.199206	5.02	KFZ67_09505	10	K	K00626	E2.3.1.9, atoB; acetyl-CoA C-acetyltransferase [EC:2.3.1.9]	Acetyl-CoA C-acetyltransferase OS=Photobacterium damselae OX=38293 GN=CTM90_05090 PE=3 SV=1	CTM90_05090	2	0.69125	6	VFIVAAK(1)R	1	7.27634e-17	143	1	3.68027e-11	128.57	1	7.27634e-17
map00121 Secondary bile acid biosynthesis	0.486779	1.67	KFZ67_14465	121	K	K01442	E3.5.1.24; choloylglycine hydrolase [EC:3.5.1.24]	Linear amide C-N hydrolase OS=Photobacterium damselae OX=38293 GN=CTM90_08420 PE=4 SV=1	CTM90_08420	2	1.8423	3	FAELTDENK(1)SK	1	0.000583335	71.085	1	0.00273943	57.175	1	0.000583335
map00190 Oxidative phosphorylation	0.381844	1.13	KFZ67_01785	44	K	K00411	UQCRFS1, RIP1, petA; ubiquinol-cytochrome c reductase iron-sulfur subunit [EC:7.1.1.8]	Ubiquinol-cytochrome c reductase iron-sulfur subunit OS=Photobacterium damselae OX=38293 GN=petA PE=4 SV=1	petA	2	1.7385	3	AK(1)AAGAPVEVDISK	1	1.04449e-06	88.561	1	1.04449e-06	88.561	1	7.44177e-05
map00190 Oxidative phosphorylation	0.381844	1.13	KFZ67_01790	236	K	K00412	CYTB, petB; ubiquinol-cytochrome c reductase cytochrome b subunit	Cytochrome b OS=Photobacterium damselae OX=38293 GN=petB PE=3 SV=1	petB	2	-0.50798	2	GEGYSPQFK(1)FHK	1	0.00163686	58.172	1	0.00320756	49.448	1	0.00163686
map00190 Oxidative phosphorylation	0.381844	1.13	KFZ67_09615	350	K	K00425	cydA; cytochrome bd ubiquinol oxidase subunit I [EC:7.1.1.7]	Cytochrome bd-I ubiquinol oxidase subunit CydA OS=Photobacterium damselae OX=38293 GN=cydA PE=3 SV=1	cydA	3	1.4861	4	K(0.999)DLGYGLLLK(0.001)PYAPNVVDATEADIQK	0.998531	4.92898e-06	59.372	0.998531	7.91137e-06	58.349	0.998529	4.92898e-06
map00190 Oxidative phosphorylation	0.381844	1.13	KFZ67_09615	347	K	K00425	cydA; cytochrome bd ubiquinol oxidase subunit I [EC:7.1.1.7]	Cytochrome bd-I ubiquinol oxidase subunit CydA OS=Photobacterium damselae OX=38293 GN=cydA PE=3 SV=1	cydA	2	0.30726	3	SPENIAAFDK(1)VK	1	1.14536e-09	115.57	1	0.000164041	78.529	1	1.14536e-09
map00190 Oxidative phosphorylation	0.381844	1.13	KFZ67_09970	267	K	K00239	sdhA, frdA; succinate dehydrogenase / fumarate reductase, flavoprotein subunit [EC:1.3.5.1 1.3.5.4]	Succinate dehydrogenase flavoprotein subunit OS=Photobacterium damselae OX=38293 GN=sdhA PE=3 SV=1	sdhA	2	-0.44072	3	GEGGYLLNK(1)DGER	1	0.00126184	54.898	1	0.00177311	49.216	1	0.00126184
map00190 Oxidative phosphorylation	0.381844	1.13	KFZ67_09970	320	K	K00239	sdhA, frdA; succinate dehydrogenase / fumarate reductase, flavoprotein subunit [EC:1.3.5.1 1.3.5.4]	Succinate dehydrogenase flavoprotein subunit OS=Photobacterium damselae OX=38293 GN=sdhA PE=3 SV=1	sdhA	2	1.5562	3	LDHLGK(1)EVLESR	1	6.18548e-05	83.204	1	6.18548e-05	83.204	1	0.00015781
map00190 Oxidative phosphorylation	0.381844	1.13	KFZ67_09970	124	K	K00239	sdhA, frdA; succinate dehydrogenase / fumarate reductase, flavoprotein subunit [EC:1.3.5.1 1.3.5.4]	Succinate dehydrogenase flavoprotein subunit OS=Photobacterium damselae OX=38293 GN=sdhA PE=3 SV=1	sdhA	2	0.056288	3	PFGGQSK(1)EFGGEQAAR	1	2.13975e-08	90.348	1	8.05754e-06	70.197	1	2.13975e-08
map00190 Oxidative phosphorylation	0.381844	1.13	KFZ67_09970	281	K	K00239	sdhA, frdA; succinate dehydrogenase / fumarate reductase, flavoprotein subunit [EC:1.3.5.1 1.3.5.4]	Succinate dehydrogenase flavoprotein subunit OS=Photobacterium damselae OX=38293 GN=sdhA PE=3 SV=1	sdhA	2	-1.3261	3	YAPNAK(1)DLAGR	1	0.00210855	59.265	1	0.00210855	59.265	1	0.00361625
map00190 Oxidative phosphorylation	0.381844	1.13	KFZ67_12925	113	K	K01507	ppa; inorganic pyrophosphatase [EC:3.6.1.1]	Inorganic pyrophosphatase OS=Photobacterium damselae OX=38293 GN=ppa PE=3 SV=1	ppa	3	-2.1677	2	VIAVPHHK(1)VSK	1	0.00539494	47.154	1	0.00698296	45.603	1	0.00539494
map00190 Oxidative phosphorylation	0.381844	1.13	KFZ67_13470	258	K	K00244	frdA; fumarate reductase flavoprotein subunit [EC:1.3.5.4]	Fumarate reductase flavoprotein subunit OS=Photobacterium damselae OX=38293 GN=CTM90_17535 PE=3 SV=1	CTM90_17535	2	-1.6945	6	GEGGIIVNK(1)NGYR	1	2.09353e-12	111.52	1	0.00033581	72.29	1	2.09353e-12
map00190 Oxidative phosphorylation	0.381844	1.13	KFZ67_13470	591	K	K00244	frdA; fumarate reductase flavoprotein subunit [EC:1.3.5.4]	Fumarate reductase flavoprotein subunit OS=Photobacterium damselae OX=38293 GN=CTM90_17535 PE=3 SV=1	CTM90_17535	3	0.13956	2	LYGAAAEEAAAK(1)EAAEQQEK	1	3.54712e-10	78.78	1	3.41824e-07	69.422	1	3.54712e-10
map00190 Oxidative phosphorylation	0.381844	1.13	KFZ67_14055	95	K	K02114	ATPF1E, atpC; F-type H+-transporting ATPase subunit epsilon	ATP synthase epsilon chain OS=Photobacterium damselae OX=38293 GN=atpC PE=3 SV=1	atpC	2	0.71807	2	GVDLDAAK(1)AEEAK	1	0.00101591	70.889	1	0.00101591	70.889	1	0.00182548
map00190 Oxidative phosphorylation	0.381844	1.13	KFZ67_14060	430	K	K02112	ATPF1B, atpD; F-type H+/Na+-transporting ATPase subunit beta [EC:7.1.2.2 7.2.2.1]	ATP synthase subunit beta OS=Photobacterium damselae OX=38293 GN=atpD PE=3 SV=1	atpD	3	0.59885	2	FLTQPYHVAEVFTGQPGIYVPLK(1)DTLR	1	5.68803e-08	66.36	1	1.78516e-06	59.372	1	5.68803e-08
map00190 Oxidative phosphorylation	0.381844	1.13	KFZ67_14060	238	K	K02112	ATPF1B, atpD; F-type H+/Na+-transporting ATPase subunit beta [EC:7.1.2.2 7.2.2.1]	ATP synthase subunit beta OS=Photobacterium damselae OX=38293 GN=atpD PE=3 SV=1	atpD	2	1.6882	3	VALTGLTMAEK(1)FR	1	1.04674e-40	161.48	1	1.04674e-40	161.48	1	1.04674e-40
map00190 Oxidative phosphorylation	0.381844	1.13	KFZ67_14065	268	K	K02115	ATPF1G, atpG; F-type H+-transporting ATPase subunit gamma	ATP synthase gamma chain OS=Photobacterium damselae OX=38293 GN=atpG_2 PE=3 SV=1	atpG_2	3	1.1772	3	AATDNAGNLIDDLQLVYNK(1)AR	1	3.83489e-44	141.18	1	2.75744e-21	103.99	1	3.83489e-44
map00190 Oxidative phosphorylation	0.381844	1.13	KFZ67_14065	31	K	K02115	ATPF1G, atpG; F-type H+-transporting ATPase subunit gamma	ATP synthase gamma chain OS=Photobacterium damselae OX=38293 GN=atpG_2 PE=3 SV=1	atpG_2	2	-0.17142	4	AMEMVAASK(1)MR	1	1.62399e-06	98.898	1	0.000575889	71.159	1	1.62399e-06
map00190 Oxidative phosphorylation	0.381844	1.13	KFZ67_14065	51	K	K02115	ATPF1G, atpG; F-type H+-transporting ATPase subunit gamma	ATP synthase gamma chain OS=Photobacterium damselae OX=38293 GN=atpG_2 PE=3 SV=1	atpG_2	4	0.63652	3	K(1)VIGHIALGSLEYQHPYLEER	1	1.08529e-15	86.575	1	1.08529e-15	86.575	1	3.98124e-05
map00190 Oxidative phosphorylation	0.381844	1.13	KFZ67_14065	159	K	K02115	ATPF1G, atpG; F-type H+-transporting ATPase subunit gamma	ATP synthase gamma chain OS=Photobacterium damselae OX=38293 GN=atpG_2 PE=3 SV=1	atpG_2	2	-0.57901	3	K(1)YDEGQLDR	1	0.000532034	86.898	1	0.000532034	86.898	1	0.0211994
map00190 Oxidative phosphorylation	0.381844	1.13	KFZ67_14070	140	K	K02111	ATPF1A, atpA; F-type H+/Na+-transporting ATPase subunit alpha [EC:7.1.2.2 7.2.2.1]	ATP synthase subunit alpha OS=Photobacterium damselae OX=38293 GN=atpA PE=3 SV=1	atpA	2	-0.63152	6	K(1)SVDQPVQTGYK	1	2.25033e-37	168.31	1	9.70204e-20	137.84	1	2.25033e-37
map00190 Oxidative phosphorylation	0.381844	1.13	KFZ67_14070	426	K	K02111	ATPF1A, atpA; F-type H+/Na+-transporting ATPase subunit alpha [EC:7.1.2.2 7.2.2.1]	ATP synthase subunit alpha OS=Photobacterium damselae OX=38293 GN=atpA PE=3 SV=1	atpA	3	-1.2321	3	QLDHGQK(1)VTELMK	1	0.000182911	71.806	1	0.000182911	71.806	1	0.000361579
map00190 Oxidative phosphorylation	0.381844	1.13	KFZ67_14080	58	K	K02109	ATPF0B, atpF; F-type H+-transporting ATPase subunit b	ATP synthase subunit b OS=Photobacterium damsela subsp. piscicida OX=38294 GN=atpF PE=3 SV=1	atpF	2	-2.5252	3	DLDLAK(1)ANASDQLK	1	7.12217e-05	75.764	1	7.12217e-05	75.764	1	0.00019691
map00195 Photosynthesis	0.198167	1.57	KFZ67_14055	95	K	K02114	ATPF1E, atpC; F-type H+-transporting ATPase subunit epsilon	ATP synthase epsilon chain OS=Photobacterium damselae OX=38293 GN=atpC PE=3 SV=1	atpC	2	0.71807	2	GVDLDAAK(1)AEEAK	1	0.00101591	70.889	1	0.00101591	70.889	1	0.00182548
map00195 Photosynthesis	0.198167	1.57	KFZ67_14060	430	K	K02112	ATPF1B, atpD; F-type H+/Na+-transporting ATPase subunit beta [EC:7.1.2.2 7.2.2.1]	ATP synthase subunit beta OS=Photobacterium damselae OX=38293 GN=atpD PE=3 SV=1	atpD	3	0.59885	2	FLTQPYHVAEVFTGQPGIYVPLK(1)DTLR	1	5.68803e-08	66.36	1	1.78516e-06	59.372	1	5.68803e-08
map00195 Photosynthesis	0.198167	1.57	KFZ67_14060	238	K	K02112	ATPF1B, atpD; F-type H+/Na+-transporting ATPase subunit beta [EC:7.1.2.2 7.2.2.1]	ATP synthase subunit beta OS=Photobacterium damselae OX=38293 GN=atpD PE=3 SV=1	atpD	2	1.6882	3	VALTGLTMAEK(1)FR	1	1.04674e-40	161.48	1	1.04674e-40	161.48	1	1.04674e-40
map00195 Photosynthesis	0.198167	1.57	KFZ67_14065	268	K	K02115	ATPF1G, atpG; F-type H+-transporting ATPase subunit gamma	ATP synthase gamma chain OS=Photobacterium damselae OX=38293 GN=atpG_2 PE=3 SV=1	atpG_2	3	1.1772	3	AATDNAGNLIDDLQLVYNK(1)AR	1	3.83489e-44	141.18	1	2.75744e-21	103.99	1	3.83489e-44
map00195 Photosynthesis	0.198167	1.57	KFZ67_14065	31	K	K02115	ATPF1G, atpG; F-type H+-transporting ATPase subunit gamma	ATP synthase gamma chain OS=Photobacterium damselae OX=38293 GN=atpG_2 PE=3 SV=1	atpG_2	2	-0.17142	4	AMEMVAASK(1)MR	1	1.62399e-06	98.898	1	0.000575889	71.159	1	1.62399e-06
map00195 Photosynthesis	0.198167	1.57	KFZ67_14065	51	K	K02115	ATPF1G, atpG; F-type H+-transporting ATPase subunit gamma	ATP synthase gamma chain OS=Photobacterium damselae OX=38293 GN=atpG_2 PE=3 SV=1	atpG_2	4	0.63652	3	K(1)VIGHIALGSLEYQHPYLEER	1	1.08529e-15	86.575	1	1.08529e-15	86.575	1	3.98124e-05
map00195 Photosynthesis	0.198167	1.57	KFZ67_14065	159	K	K02115	ATPF1G, atpG; F-type H+-transporting ATPase subunit gamma	ATP synthase gamma chain OS=Photobacterium damselae OX=38293 GN=atpG_2 PE=3 SV=1	atpG_2	2	-0.57901	3	K(1)YDEGQLDR	1	0.000532034	86.898	1	0.000532034	86.898	1	0.0211994
map00195 Photosynthesis	0.198167	1.57	KFZ67_14070	140	K	K02111	ATPF1A, atpA; F-type H+/Na+-transporting ATPase subunit alpha [EC:7.1.2.2 7.2.2.1]	ATP synthase subunit alpha OS=Photobacterium damselae OX=38293 GN=atpA PE=3 SV=1	atpA	2	-0.63152	6	K(1)SVDQPVQTGYK	1	2.25033e-37	168.31	1	9.70204e-20	137.84	1	2.25033e-37
map00195 Photosynthesis	0.198167	1.57	KFZ67_14070	426	K	K02111	ATPF1A, atpA; F-type H+/Na+-transporting ATPase subunit alpha [EC:7.1.2.2 7.2.2.1]	ATP synthase subunit alpha OS=Photobacterium damselae OX=38293 GN=atpA PE=3 SV=1	atpA	3	-1.2321	3	QLDHGQK(1)VTELMK	1	0.000182911	71.806	1	0.000182911	71.806	1	0.000361579
map00195 Photosynthesis	0.198167	1.57	KFZ67_14080	58	K	K02109	ATPF0B, atpF; F-type H+-transporting ATPase subunit b	ATP synthase subunit b OS=Photobacterium damsela subsp. piscicida OX=38294 GN=atpF PE=3 SV=1	atpF	2	-2.5252	3	DLDLAK(1)ANASDQLK	1	7.12217e-05	75.764	1	7.12217e-05	75.764	1	0.00019691
map00220 Arginine biosynthesis	0.448112	1.18	KFZ67_01065	311	K	K00821	argD; acetylornithine/N-succinyldiaminopimelate aminotransferase [EC:2.6.1.11 2.6.1.17]	Acetylornithine aminotransferase OS=Photobacterium damselae subsp. damselae OX=85581 GN=argD PE=3 SV=1	argD	3	0.26568	4	AAISEIIKPELLAGVK(1)ER	1	1.06545e-15	105.06	0.999999	1.67532e-11	87.24	1	1.06545e-15
map00220 Arginine biosynthesis	0.448112	1.18	KFZ67_02870	298	K	K01425	glsA, GLS; glutaminase [EC:3.5.1.2]	Glutaminase OS=Photobacterium damselae OX=38293 GN=glsA PE=3 SV=1	glsA	2	0.47754	8	GQLMIK(1)QVAK	1	0.00108223	68.657	1	0.00275616	59.908	1	0.00108223
map00220 Arginine biosynthesis	0.448112	1.18	KFZ67_02870	286	K	K01425	glsA, GLS; glutaminase [EC:3.5.1.2]	Glutaminase OS=Photobacterium damselae OX=38293 GN=glsA PE=3 SV=1	glsA	2	2.6837	2	LDK(1)YGNSVR	1	0.00166817	77.14	1	0.00166817	77.14	1	0.0038011
map00220 Arginine biosynthesis	0.448112	1.18	KFZ67_12520	3	K	K01478	arcA; arginine deiminase [EC:3.5.3.6]	Arginine deiminase OS=Photobacterium damsela subsp. piscicida OX=38294 GN=arcA PE=3 SV=1	arcA	2	-2.107	5	SK(1)FYVGSEIGQLR	1	1.51683e-09	101.53	1	1.51683e-09	101.53	1	1.55416e-09
map00220 Arginine biosynthesis	0.448112	1.18	KFZ67_12530	35	K	K00611	OTC, argF, argI; ornithine carbamoyltransferase [EC:2.1.3.3]	Ornithine carbamoyltransferase OS=Photobacterium damselae OX=38293 GN=argF PE=3 SV=1	argF	2	-0.58233	9	AK(1)YNGYEQPR	1	3.62913e-05	99.283	1	0.000103609	94.363	1	3.62913e-05
map00220 Arginine biosynthesis	0.448112	1.18	KFZ67_12530	32	K	K00611	OTC, argF, argI; ornithine carbamoyltransferase [EC:2.1.3.3]	Ornithine carbamoyltransferase OS=Photobacterium damselae OX=38293 GN=argF PE=3 SV=1	argF	3	0.017327	7	EIQHLLELSAELK(1)K	1	3.10418e-10	105.19	1	4.34422e-07	92.939	1	3.10418e-10
map00220 Arginine biosynthesis	0.448112	1.18	KFZ67_12530	292	K	K00611	OTC, argF, argI; ornithine carbamoyltransferase [EC:2.1.3.3]	Ornithine carbamoyltransferase OS=Photobacterium damselae OX=38293 GN=argF PE=3 SV=1	argF	2	0.39978	4	ELAK(1)EYPVLAK	1	0.00110751	65.842	1	0.00110751	65.842	1	0.00110751
map00220 Arginine biosynthesis	0.448112	1.18	KFZ67_12530	153	K	K00611	OTC, argF, argI; ornithine carbamoyltransferase [EC:2.1.3.3]	Ornithine carbamoyltransferase OS=Photobacterium damselae OX=38293 GN=argF PE=3 SV=1	argF	3	0.16513	4	GK(1)QLHEITFAYLGDAR	1	1.88664e-22	127.2	1	1.88664e-22	127.2	1	1.88664e-22
map00220 Arginine biosynthesis	0.448112	1.18	KFZ67_12530	263	K	K00611	OTC, argF, argI; ornithine carbamoyltransferase [EC:2.1.3.3]	Ornithine carbamoyltransferase OS=Photobacterium damselae OX=38293 GN=argF PE=3 SV=1	argF	3	1.565	3	INLMLPYQVNMDVIK(1)ATGNPHVK	1	0.000129028	47.564	1	0.000169205	46.818	1	0.000129028
map00220 Arginine biosynthesis	0.448112	1.18	KFZ67_12530	47	K	K00611	OTC, argF, argI; ornithine carbamoyltransferase [EC:2.1.3.3]	Ornithine carbamoyltransferase OS=Photobacterium damselae OX=38293 GN=argF PE=3 SV=1	argF	2	2.2113	2	LTGK(1)NIALIFEK	1	1.70535e-07	107.2	1	1.70535e-07	107.2	1	2.78475e-06
map00220 Arginine biosynthesis	0.448112	1.18	KFZ67_12530	55	K	K00611	OTC, argF, argI; ornithine carbamoyltransferase [EC:2.1.3.3]	Ornithine carbamoyltransferase OS=Photobacterium damselae OX=38293 GN=argF PE=3 SV=1	argF	2	-0.79345	4	NIALIFEK(1)TSTR	1	6.04315e-48	172.13	1	6.04315e-48	172.13	1	1.18538e-37
map00230 Purine metabolism	0.0128562	1.6	KFZ67_00625	3	K	K00942	E2.7.4.8, gmk; guanylate kinase [EC:2.7.4.8]	Guanylate kinase OS=Photobacterium damselae OX=38293 GN=gmk PE=3 SV=1	gmk	2	1.0257	3	SK(1)GTLYIVSAPSGAGK	1	1.11401e-05	68.189	1	1.11401e-05	68.189	1	8.1127e-05
map00230 Purine metabolism	0.0128562	1.6	KFZ67_02060	2	K	K00760	hprT, hpt, HPRT1; hypoxanthine phosphoribosyltransferase [EC:2.4.2.8]	Hypoxanthine phosphoribosyltransferase OS=Photobacterium damsela subsp. piscicida OX=38294 GN=hpt PE=3 SV=1	hpt	3	-2.107	3	MK(1)QHTIEVMISEQEVQER	1	3.15432e-12	95.205	1	3.15432e-12	95.205	1	3.58587e-12
map00230 Purine metabolism	0.0128562	1.6	KFZ67_02980	407	K	K06966	ppnN; pyrimidine/purine-5'-nucleotide nucleosidase [EC:3.2.2.10 3.2.2.-]	LOG family protein OS=Photobacterium damselae subsp. damselae OX=85581 GN=ppnN PE=4 SV=1	ppnN	2	2.1938	3	EEGIQAIEK(1)YGK	1	0.000275388	73.435	1	0.00216096	55.261	1	0.000275388
map00230 Purine metabolism	0.0128562	1.6	KFZ67_03710	111	K	K00948	PRPS, prsA; ribose-phosphate pyrophosphokinase [EC:2.7.6.1]	Ribose-phosphate pyrophosphokinase OS=Photobacterium damselae OX=38293 GN=prs PE=3 SV=1	prs	3	-1.0229	4	VPITAK(1)VVADFLSNVGVDR	1	5.99068e-16	103.41	1	5.99068e-16	103.41	1	6.72431e-16
map00230 Purine metabolism	0.0128562	1.6	KFZ67_03770	403	K	K11751	ushA; 5'-nucleotidase / UDP-sugar diphosphatase [EC:3.1.3.5 3.6.1.45]	Bifunctional UDP-sugar hydrolase/5'-nucleotidase periplasmic OS=Photobacterium damselae OX=38293 GN=ushA PE=3 SV=1	ushA	2	-0.83802	3	AK(1)ADFAVMNSGGVR	1	1.119e-05	84.173	1	0.000512417	58.079	1	1.119e-05
map00230 Purine metabolism	0.0128562	1.6	KFZ67_03770	488	K	K11751	ushA; 5'-nucleotidase / UDP-sugar diphosphatase [EC:3.1.3.5 3.6.1.45]	Bifunctional UDP-sugar hydrolase/5'-nucleotidase periplasmic OS=Photobacterium damselae OX=38293 GN=ushA PE=3 SV=1	ushA	2	1.1811	2	IGGK(1)ALNPTATYR	1	2.38581e-06	88.075	1	2.38581e-06	88.075	1	0.000137832
map00230 Purine metabolism	0.0128562	1.6	KFZ67_03770	70	K	K11751	ushA; 5'-nucleotidase / UDP-sugar diphosphatase [EC:3.1.3.5 3.6.1.45]	Bifunctional UDP-sugar hydrolase/5'-nucleotidase periplasmic OS=Photobacterium damselae OX=38293 GN=ushA PE=3 SV=1	ushA	2	0.64849	2	TLLDK(1)LR	1	2.14687e-19	116.54	1	2.14687e-19	116.54	1	0.000583211
map00230 Purine metabolism	0.0128562	1.6	KFZ67_05990	219	K	K00873	PK, pyk; pyruvate kinase [EC:2.7.1.40]	Pyruvate kinase OS=Photobacterium damselae OX=38293 GN=BST98_06040 PE=3 SV=1	BST98_06040	2	0.4741	3	LAEEAGLQAK(1)LVAK	1	0.0002391	66.004	1	0.00111565	48.532	1	0.0002391
map00230 Purine metabolism	0.0128562	1.6	KFZ67_10005	273	K	K01835	pgm; phosphoglucomutase [EC:5.4.2.2]	Phosphoglucomutase, alpha-D-glucose phosphate-specific OS=Photobacterium damselae OX=38293 GN=BST98_09950 PE=3 SV=1	BST98_09950	2	1.1601	6	FMSLDK(1)DGVIR	1	0.00024225	77.674	1	0.00597825	50.354	1	0.00024225
map00230 Purine metabolism	0.0128562	1.6	KFZ67_10005	525	K	K01835	pgm; phosphoglucomutase [EC:5.4.2.2]	Phosphoglucomutase, alpha-D-glucose phosphate-specific OS=Photobacterium damselae OX=38293 GN=BST98_09950 PE=3 SV=1	BST98_09950	3	0.084306	3	GK(1)EHLALIEK	1	0.000584808	73.435	1	0.000764397	71.176	1	0.000584808
map00230 Purine metabolism	0.0128562	1.6	KFZ67_10090	192	K	K00939	adk, AK; adenylate kinase [EC:2.7.4.3]	Adenylate kinase OS=Photobacterium damsela subsp. piscicida OX=38294 GN=adk PE=3 SV=1	adk	2	-1.4596	10	EAAAGNTK(1)YLK	1	1.81736e-07	108.9	1	1.36618e-06	100.69	1	1.81736e-07
map00230 Purine metabolism	0.0128562	1.6	KFZ67_10090	50	K	K00939	adk, AK; adenylate kinase [EC:2.7.4.3]	Adenylate kinase OS=Photobacterium damsela subsp. piscicida OX=38294 GN=adk PE=3 SV=1	adk	3	1.591	2	QAK(1)SVIDAGQLVSDDIILGLVK	1	3.67753e-27	111.66	1	3.67753e-27	111.66	1	7.75779e-22
map00230 Purine metabolism	0.0128562	1.6	KFZ67_10090	69	K	K00939	adk, AK; adenylate kinase [EC:2.7.4.3]	Adenylate kinase OS=Photobacterium damsela subsp. piscicida OX=38294 GN=adk PE=3 SV=1	adk	3	-0.69598	4	SVIDAGQLVSDDIILGLVK(1)ER	1	7.82897e-35	128.67	1	5.83813e-27	111.66	1	7.82897e-35
map00230 Purine metabolism	0.0128562	1.6	KFZ67_10090	145	K	K00939	adk, AK; adenylate kinase [EC:2.7.4.3]	Adenylate kinase OS=Photobacterium damsela subsp. piscicida OX=38294 GN=adk PE=3 SV=1	adk	2	2.7291	3	VEGK(1)DDVTGEDLVVR	1	4.67566e-06	75.911	1	0.000134667	64.565	1	4.67566e-06
map00230 Purine metabolism	0.0128562	1.6	KFZ67_10935	115	K	K00769	gpt; xanthine phosphoribosyltransferase [EC:2.4.2.22]	Xanthine phosphoribosyltransferase OS=Photobacterium damsela subsp. piscicida OX=38294 GN=gpt PE=3 SV=1	gpt	2	-0.69173	3	FVTVCAK(1)PAGK	1	3.52335e-06	96.745	1	0.00144499	62.466	1	3.52335e-06
map00230 Purine metabolism	0.0128562	1.6	KFZ67_10935	108	K	K00769	gpt; xanthine phosphoribosyltransferase [EC:2.4.2.22]	Xanthine phosphoribosyltransferase OS=Photobacterium damsela subsp. piscicida OX=38294 GN=gpt PE=3 SV=1	gpt	2	1.0151	3	GK(1)FVTVCAK	1	0.0114363	52.49	1	0.0114363	52.49	1	0.0114363
map00230 Purine metabolism	0.0128562	1.6	KFZ67_11135	267	K	K01952	PFAS, purL; phosphoribosylformylglycinamidine synthase [EC:6.3.5.3]	Phosphoribosylformylglycinamidine synthase OS=Photobacterium damselae subsp. damselae OX=85581 GN=purL PE=3 SV=1	purL	2	2.2273	7	DNAAVMTGSK(1)VGR	1	0.000164041	72.681	1	0.00029204	70.889	1	0.000164041
map00230 Purine metabolism	0.0128562	1.6	KFZ67_11175	358	K	K01951	guaA, GMPS; GMP synthase (glutamine-hydrolysing) [EC:6.3.5.2]	GMP synthase [glutamine-hydrolyzing] OS=Photobacterium damselae OX=38293 GN=guaA PE=3 SV=1	guaA	4	1.4048	5	AHVIK(1)SHHNVGGLPDDMQMGLVEPLK	1	6.96485e-17	91.416	1	2.77991e-11	76.799	1	6.96485e-17
map00230 Purine metabolism	0.0128562	1.6	KFZ67_11180	177	K	K00088	IMPDH, guaB; IMP dehydrogenase [EC:1.1.1.205]	Inosine-5'-monophosphate dehydrogenase OS=Photobacterium damsela subsp. piscicida OX=38294 GN=guaB PE=3 SV=1	guaB	2	-1.9088	2	EEVEAIMQK(1)HR	1	0.00193172	47.894	1	0.00866644	43.958	1	0.00193172
map00230 Purine metabolism	0.0128562	1.6	KFZ67_11180	428	K	K00088	IMPDH, guaB; IMP dehydrogenase [EC:1.1.1.205]	Inosine-5'-monophosphate dehydrogenase OS=Photobacterium damsela subsp. piscicida OX=38294 GN=guaB PE=3 SV=1	guaB	2	0.31805	2	GHLK(1)EIVHQQMGGLR	1	3.31439e-06	76.311	1	3.31439e-06	76.311	1	0.00245776
map00230 Purine metabolism	0.0128562	1.6	KFZ67_11180	396	K	K00088	IMPDH, guaB; IMP dehydrogenase [EC:1.1.1.205]	Inosine-5'-monophosphate dehydrogenase OS=Photobacterium damsela subsp. piscicida OX=38294 GN=guaB PE=3 SV=1	guaB	2	-1.9974	7	GMGSLGAMSK(1)GSSDR	1	3.2575e-05	63.062	1	3.2575e-05	63.062	1	0.000111114
map00230 Purine metabolism	0.0128562	1.6	KFZ67_11180	199	K	K00088	IMPDH, guaB; IMP dehydrogenase [EC:1.1.1.205]	Inosine-5'-monophosphate dehydrogenase OS=Photobacterium damsela subsp. piscicida OX=38294 GN=guaB PE=3 SV=1	guaB	2	1.3907	3	GMITAK(1)DFQK	1	0.000432502	81.771	1	0.00180077	64.73	1	0.000432502
map00230 Purine metabolism	0.0128562	1.6	KFZ67_11180	456	K	K00088	IMPDH, guaB; IMP dehydrogenase [EC:1.1.1.205]	Inosine-5'-monophosphate dehydrogenase OS=Photobacterium damsela subsp. piscicida OX=38294 GN=guaB PE=3 SV=1	guaB	2	2.3404	2	TK(1)AEFVR	1	0.0220065	69.905	1	0.0305778	63.21	1	0.0220065
map00230 Purine metabolism	0.0128562	1.6	KFZ67_11180	182	K	K00088	IMPDH, guaB; IMP dehydrogenase [EC:1.1.1.205]	Inosine-5'-monophosphate dehydrogenase OS=Photobacterium damsela subsp. piscicida OX=38294 GN=guaB PE=3 SV=1	guaB	2	1.4398	8	VEK(1)VLLVDDSFR	1	2.87563e-20	144.57	1	4.23559e-20	143.42	1	2.87563e-20
map00230 Purine metabolism	0.0128562	1.6	KFZ67_11240	16	K	K00940	ndk, NME; nucleoside-diphosphate kinase [EC:2.7.4.6]	Nucleoside diphosphate kinase OS=Photobacterium damselae OX=38293 GN=ndk PE=3 SV=1	ndk	2	0.78342	3	TFSIVKPDAVK(1)R	0.999988	6.46098e-05	90.434	0.999988	6.46098e-05	90.434	0.999405	0.000108127
map00230 Purine metabolism	0.0128562	1.6	KFZ67_11810	54	K	K03784	deoD; purine-nucleoside phosphorylase [EC:2.4.2.1]	Purine nucleoside phosphorylase DeoD-type OS=Photobacterium damselae OX=38293 GN=deoD PE=3 SV=1	deoD	2	-3.4177	7	NMYGYTGTYK(1)GR	1	9.90855e-21	146.16	1	5.01143e-10	117.86	1	9.90855e-21
map00230 Purine metabolism	0.0128562	1.6	KFZ67_12730	434	K	K00873	PK, pyk; pyruvate kinase [EC:2.7.1.40]	Pyruvate kinase OS=Photobacterium damsela subsp. piscicida OX=38294 GN=pykF PE=3 SV=1	pykF	2	0.11361	2	GK(1)ELALETGLGAK	1	0.000105945	78.814	1	0.000105945	78.814	1	0.000137832
map00230 Purine metabolism	0.0128562	1.6	KFZ67_12730	360	K	K00873	PK, pyk; pyruvate kinase [EC:2.7.1.40]	Pyruvate kinase OS=Photobacterium damsela subsp. piscicida OX=38294 GN=pykF PE=3 SV=1	pykF	2	1.4009	5	ITEAVCK(1)GAVDTAEK	1	1.75211e-22	131.86	1	1.75211e-22	131.86	1	1.90816e-17
map00230 Purine metabolism	0.0128562	1.6	KFZ67_12730	389	K	K00873	PK, pyk; pyruvate kinase [EC:2.7.1.40]	Pyruvate kinase OS=Photobacterium damsela subsp. piscicida OX=38294 GN=pykF PE=3 SV=1	pykF	2	-1.2335	3	K(1)YFPTAR	1	4.84642e-11	133.81	1	4.84642e-11	133.81	1	2.52483e-10
map00230 Purine metabolism	0.0128562	1.6	KFZ67_12730	59	K	K00873	PK, pyk; pyruvate kinase [EC:2.7.1.40]	Pyruvate kinase OS=Photobacterium damsela subsp. piscicida OX=38294 GN=pykF PE=3 SV=1	pykF	2	0.23093	3	NTGK(1)QLAILLDTK	1	0.00035064	69.516	1	0.00160987	51.03	1	0.00035064
map00230 Purine metabolism	0.0128562	1.6	KFZ67_13105	7	K	K00860	cysC; adenylylsulfate kinase [EC:2.7.1.25]	Adenylyl-sulfate kinase OS=Photobacterium damselae OX=38293 GN=cysC PE=3 SV=1	cysC	3	-0.27079	4	TSVLVK(1)DNVIWHQHSVNK	1	2.59995e-09	73.953	1	2.42245e-07	70.802	1	2.59995e-09
map00230 Purine metabolism	0.0128562	1.6	KFZ67_13115	362	K	K00956	cysN; sulfate adenylyltransferase subunit 1 [EC:2.7.7.4]	Sulfate adenylyltransferase subunit 1 OS=Photobacterium damselae OX=38293 GN=cysN PE=3 SV=1	cysN	3	1.2031	5	IAGNK(1)TQGQVIGFEHQIDINK	1	5.92562e-11	82.635	1	6.81326e-07	64.522	1	5.92562e-11
map00230 Purine metabolism	0.0128562	1.6	KFZ67_13115	459	K	K00956	cysN; sulfate adenylyltransferase subunit 1 [EC:2.7.7.4]	Sulfate adenylyltransferase subunit 1 OS=Photobacterium damselae OX=38293 GN=cysN PE=3 SV=1	cysN	3	-0.477	3	K(1)HFPHWNSSDISK	1	0.000240764	70.563	1	0.000278187	70.438	1	0.000240764
map00230 Purine metabolism	0.0128562	1.6	KFZ67_13115	24	K	K00956	cysN; sulfate adenylyltransferase subunit 1 [EC:2.7.7.4]	Sulfate adenylyltransferase subunit 1 OS=Photobacterium damselae OX=38293 GN=cysN PE=3 SV=1	cysN	4	-0.41155	3	MNHAIQQQVAELGIEAYLDQHQNK(1)SLLR	1	7.1067e-36	119.87	1	3.02955e-35	111.55	1	7.1067e-36
map00230 Purine metabolism	0.0128562	1.6	KFZ67_13115	278	K	K00956	cysN; sulfate adenylyltransferase subunit 1 [EC:2.7.7.4]	Sulfate adenylyltransferase subunit 1 OS=Photobacterium damselae OX=38293 GN=cysN PE=3 SV=1	cysN	2	-0.79996	2	VK(1)VLPSEK	1	5.78584e-05	105.1	1	0.000131841	98.582	1	5.78584e-05
map00230 Purine metabolism	0.0128562	1.6	KFZ67_13115	284	K	K00956	cysN; sulfate adenylyltransferase subunit 1 [EC:2.7.7.4]	Sulfate adenylyltransferase subunit 1 OS=Photobacterium damselae OX=38293 GN=cysN PE=3 SV=1	cysN	2	0.8084	4	VLPSEK(1)ESYIER	1	9.67751e-14	125.54	1	9.67751e-14	125.54	1	1.02819e-05
map00230 Purine metabolism	0.0128562	1.6	KFZ67_13115	105	K	K00956	cysN; sulfate adenylyltransferase subunit 1 [EC:2.7.7.4]	Sulfate adenylyltransferase subunit 1 OS=Photobacterium damselae OX=38293 GN=cysN PE=3 SV=1	cysN	2	0.17473	2	YFSTQK(1)R	1	0.000192935	107.43	1	0.000192935	107.43	1	0.000263532
map00230 Purine metabolism	0.0128562	1.6	KFZ67_13120	115	K	K00957	cysD; sulfate adenylyltransferase subunit 2 [EC:2.7.7.4]	Sulfate adenylyltransferase subunit 2 OS=Photobacterium damselae OX=38293 GN=cysD PE=3 SV=1	cysD	2	2.5314	5	HTDIMK(1)TQALK	1	2.56317e-27	154.28	1	2.56317e-27	154.28	1	2.47953e-13
map00230 Purine metabolism	0.0128562	1.6	KFZ67_13120	120	K	K00957	cysD; sulfate adenylyltransferase subunit 2 [EC:2.7.7.4]	Sulfate adenylyltransferase subunit 2 OS=Photobacterium damselae OX=38293 GN=cysD PE=3 SV=1	cysD	3	1.5478	3	TQALK(1)QALNQYGFDAAFGGAR	1	5.69251e-27	111.93	1	5.69251e-27	111.93	1	4.02357e-21
map00230 Purine metabolism	0.0128562	1.6	KFZ67_13120	82	K	K00957	cysD; sulfate adenylyltransferase subunit 2 [EC:2.7.7.4]	Sulfate adenylyltransferase subunit 2 OS=Photobacterium damselae OX=38293 GN=cysD PE=3 SV=1	cysD	3	0.25407	5	K(1)YGFELLVHK	1	0.000633938	73.499	1	0.000633938	73.499	1	0.000633938
map00230 Purine metabolism	0.0128562	1.6	KFZ67_13120	238	K	K00957	cysD; sulfate adenylyltransferase subunit 2 [EC:2.7.7.4]	Sulfate adenylyltransferase subunit 2 OS=Photobacterium damselae OX=38293 GN=cysD PE=3 SV=1	cysD	2	-1.8278	7	MPLTDSDK(1)VEQK	1	8.62978e-06	88.021	1	0.000374447	71.888	1	8.62978e-06
map00230 Purine metabolism	0.0128562	1.6	KFZ67_13120	177	K	K00957	cysD; sulfate adenylyltransferase subunit 2 [EC:2.7.7.4]	Sulfate adenylyltransferase subunit 2 OS=Photobacterium damselae OX=38293 GN=cysD PE=3 SV=1	cysD	2	-0.80529	5	TYNGQINK(1)GESIR	1	7.87231e-17	124.07	1	1.19737e-12	116.19	1	7.87231e-17
map00230 Purine metabolism	0.0128562	1.6	KFZ67_13130	201	K	K01119	cpdB; 2',3'-cyclic-nucleotide 2'-phosphodiesterase / 3'-nucleotidase [EC:3.1.4.16 3.1.3.6]	2',3'-cyclic-nucleotide 2'-phosphodiesterase OS=Photobacterium damselae OX=38293 GN=cpdB PE=3 SV=1	cpdB	2	0.053078	3	NLEGK(1)VEAK	1	0.00388921	64.374	1	0.00388921	64.374	1	0.00977403
map00230 Purine metabolism	0.0128562	1.6	KFZ67_13285	19	K	K01939	purA, ADSS; adenylosuccinate synthase [EC:6.3.4.4]	Adenylosuccinate synthetase OS=Photobacterium damsela subsp. piscicida OX=38294 GN=purA PE=3 SV=1	purA	2	0.42626	4	GK(1)IVDLLTEDAK	1	4.77979e-06	92.792	1	0.000636333	68.121	1	4.77979e-06
map00230 Purine metabolism	0.0128562	1.6	KFZ67_13285	432	K	K01939	purA, ADSS; adenylosuccinate synthase [EC:6.3.4.4]	Adenylosuccinate synthetase OS=Photobacterium damsela subsp. piscicida OX=38294 GN=purA PE=3 SV=1	purA	2	-1.3236	5	NETIIK(1)VHPYGE	1	0.000191371	77.279	1	0.000499508	70.089	1	0.000191371
map00230 Purine metabolism	0.0128562	1.6	KFZ67_17975	27	K	K03784	deoD; purine-nucleoside phosphorylase [EC:2.4.2.1]	Purine nucleoside phosphorylase DeoD-type OS=Photobacterium damselae OX=38293 GN=deoD PE=3 SV=1	deoD	2	0.36151	3	AK(1)FIAETYLEDAK	1	0.000265352	71.513	1	0.000696865	61.409	1	0.000265352
map00240 Pyrimidine metabolism	0.00877237	1.84	KFZ67_02530	239	K	K01937	pyrG, CTPS; CTP synthase [EC:6.3.4.2]	CTP synthase OS=Photobacterium damselae OX=38293 GN=pyrG PE=3 SV=1	pyrG	2	0.93002	3	AVISMK(1)DVDSIYK	1	0.000326424	54.09	1	0.000326424	50.641	1	0.000847781
map00240 Pyrimidine metabolism	0.00877237	1.84	KFZ67_02530	361	K	K01937	pyrG, CTPS; CTP synthase [EC:6.3.4.2]	CTP synthase OS=Photobacterium damselae OX=38293 GN=pyrG PE=3 SV=1	pyrG	2	0.16661	3	GVEGK(1)ILTAK	1	0.00192839	63.624	1	0.00206207	62.466	1	0.00192839
map00240 Pyrimidine metabolism	0.00877237	1.84	KFZ67_02530	366	K	K01937	pyrG, CTPS; CTP synthase [EC:6.3.4.2]	CTP synthase OS=Photobacterium damselae OX=38293 GN=pyrG PE=3 SV=1	pyrG	2	-0.10302	2	ILTAK(1)YAR	1	1.93025e-08	122.13	1	0.000132509	98.523	1	1.93025e-08
map00240 Pyrimidine metabolism	0.00877237	1.84	KFZ67_02530	326	K	K01937	pyrG, CTPS; CTP synthase [EC:6.3.4.2]	CTP synthase OS=Photobacterium damselae OX=38293 GN=pyrG PE=3 SV=1	pyrG	2	0.4867	6	IK(1)YIDSQDVESK	1	3.40275e-07	104.24	1	3.64667e-05	84.365	1	3.40275e-07
map00240 Pyrimidine metabolism	0.00877237	1.84	KFZ67_02530	432	K	K01937	pyrG, CTPS; CTP synthase [EC:6.3.4.2]	CTP synthase OS=Photobacterium damselae OX=38293 GN=pyrG PE=3 SV=1	pyrG	2	-3.2391	3	SEK(1)SDLGGTMR	1	0.00179928	57.175	1	0.011105	40.475	1	0.00179928
map00240 Pyrimidine metabolism	0.00877237	1.84	KFZ67_02980	407	K	K06966	ppnN; pyrimidine/purine-5'-nucleotide nucleosidase [EC:3.2.2.10 3.2.2.-]	LOG family protein OS=Photobacterium damselae subsp. damselae OX=85581 GN=ppnN PE=4 SV=1	ppnN	2	2.1938	3	EEGIQAIEK(1)YGK	1	0.000275388	73.435	1	0.00216096	55.261	1	0.000275388
map00240 Pyrimidine metabolism	0.00877237	1.84	KFZ67_03075	166	K	K09903	pyrH; uridylate kinase [EC:2.7.4.22]	Uridylate kinase OS=Photobacterium damselae OX=38293 GN=pyrH PE=3 SV=1	pyrH	2	1.0146	7	ATK(1)VDGVFTADPVK	1	5.16515e-05	78.505	1	0.000151101	70.26	1	5.16515e-05
map00240 Pyrimidine metabolism	0.00877237	1.84	KFZ67_03075	222	K	K09903	pyrH; uridylate kinase [EC:2.7.4.22]	Uridylate kinase OS=Photobacterium damselae OX=38293 GN=pyrH PE=3 SV=1	pyrH	2	0.90301	7	VFNMNK(1)PGALR	1	4.46812e-06	94.692	1	4.46812e-06	94.692	1	6.80276e-06
map00240 Pyrimidine metabolism	0.00877237	1.84	KFZ67_03360	7	K	K00761	upp, UPRT; uracil phosphoribosyltransferase [EC:2.4.2.9]	Uracil phosphoribosyltransferase OS=Photobacterium damsela subsp. piscicida OX=38294 GN=upp PE=3 SV=1	upp	3	0.77009	2	VVEVK(1)HPLVK	1	0.00394772	54.419	1	0.00394772	54.419	1	0.00485431
map00240 Pyrimidine metabolism	0.00877237	1.84	KFZ67_03770	403	K	K11751	ushA; 5'-nucleotidase / UDP-sugar diphosphatase [EC:3.1.3.5 3.6.1.45]	Bifunctional UDP-sugar hydrolase/5'-nucleotidase periplasmic OS=Photobacterium damselae OX=38293 GN=ushA PE=3 SV=1	ushA	2	-0.83802	3	AK(1)ADFAVMNSGGVR	1	1.119e-05	84.173	1	0.000512417	58.079	1	1.119e-05
map00240 Pyrimidine metabolism	0.00877237	1.84	KFZ67_03770	488	K	K11751	ushA; 5'-nucleotidase / UDP-sugar diphosphatase [EC:3.1.3.5 3.6.1.45]	Bifunctional UDP-sugar hydrolase/5'-nucleotidase periplasmic OS=Photobacterium damselae OX=38293 GN=ushA PE=3 SV=1	ushA	2	1.1811	2	IGGK(1)ALNPTATYR	1	2.38581e-06	88.075	1	2.38581e-06	88.075	1	0.000137832
map00240 Pyrimidine metabolism	0.00877237	1.84	KFZ67_03770	70	K	K11751	ushA; 5'-nucleotidase / UDP-sugar diphosphatase [EC:3.1.3.5 3.6.1.45]	Bifunctional UDP-sugar hydrolase/5'-nucleotidase periplasmic OS=Photobacterium damselae OX=38293 GN=ushA PE=3 SV=1	ushA	2	0.64849	2	TLLDK(1)LR	1	2.14687e-19	116.54	1	2.14687e-19	116.54	1	0.000583211
map00240 Pyrimidine metabolism	0.00877237	1.84	KFZ67_06110	98	K	K01465	URA4, pyrC; dihydroorotase [EC:3.5.2.3]	Dihydroorotase OS=Photobacterium damselae OX=38293 GN=pyrC PE=3 SV=1	pyrC	3	-1.642	5	ESGHIYAAK(1)LYPAGATTNSDSGVTSIDK	1	8.10149e-36	119.45	1	1.64781e-19	96.351	1	8.10149e-36
map00240 Pyrimidine metabolism	0.00877237	1.84	KFZ67_07295	274	K	K00254	DHODH, pyrD; dihydroorotate dehydrogenase [EC:1.3.5.2]	Dihydroorotate dehydrogenase (quinone) OS=Photobacterium damselae OX=38293 GN=pyrD PE=3 SV=1	pyrD	2	1.4069	2	PLQNK(1)STAVIAK	1	2.02109e-20	145.29	1	1.26358e-09	114.87	1	2.02109e-20
map00240 Pyrimidine metabolism	0.00877237	1.84	KFZ67_11240	16	K	K00940	ndk, NME; nucleoside-diphosphate kinase [EC:2.7.4.6]	Nucleoside diphosphate kinase OS=Photobacterium damselae OX=38293 GN=ndk PE=3 SV=1	ndk	2	0.78342	3	TFSIVKPDAVK(1)R	0.999988	6.46098e-05	90.434	0.999988	6.46098e-05	90.434	0.999405	0.000108127
map00240 Pyrimidine metabolism	0.00877237	1.84	KFZ67_11810	54	K	K03784	deoD; purine-nucleoside phosphorylase [EC:2.4.2.1]	Purine nucleoside phosphorylase DeoD-type OS=Photobacterium damselae OX=38293 GN=deoD PE=3 SV=1	deoD	2	-3.4177	7	NMYGYTGTYK(1)GR	1	9.90855e-21	146.16	1	5.01143e-10	117.86	1	9.90855e-21
map00240 Pyrimidine metabolism	0.00877237	1.84	KFZ67_12020	862	K	K01955	carB, CPA2; carbamoyl-phosphate synthase large subunit [EC:6.3.5.5]	Carbamoyl-phosphate synthase large chain OS=Photobacterium damselae OX=38293 GN=carB PE=3 SV=1	carB	2	1.3258	3	ATGAPLAK(1)IAAR	1	0.0008409	65.179	1	0.0008409	65.179	1	0.0008409
map00240 Pyrimidine metabolism	0.00877237	1.84	KFZ67_12020	527	K	K01955	carB, CPA2; carbamoyl-phosphate synthase large subunit [EC:6.3.5.5]	Carbamoyl-phosphate synthase large chain OS=Photobacterium damselae OX=38293 GN=carB PE=3 SV=1	carB	3	0.69896	3	DQYNIHPVYK(1)R	1	0.000247754	75.088	1	0.000247754	75.088	1	0.000951988
map00240 Pyrimidine metabolism	0.00877237	1.84	KFZ67_12020	962	K	K01955	carB, CPA2; carbamoyl-phosphate synthase large subunit [EC:6.3.5.5]	Carbamoyl-phosphate synthase large chain OS=Photobacterium damselae OX=38293 GN=carB PE=3 SV=1	carB	2	-0.49538	2	VVDLASK(1)LIK	1	0.00603875	53.237	1	0.00603875	53.237	1	0.0122454
map00240 Pyrimidine metabolism	0.00877237	1.84	KFZ67_12025	330	K	K01956	carA, CPA1; carbamoyl-phosphate synthase small subunit [EC:6.3.5.5]	Carbamoyl-phosphate synthase small chain OS=Photobacterium damsela subsp. piscicida OX=38294 GN=carA PE=3 SV=1	carA	4	-1.7003	5	ATHK(1)SLFDGSLQGIHR	1	1.91518e-08	88.768	1	1.58591e-06	77.746	1	1.91518e-08
map00240 Pyrimidine metabolism	0.00877237	1.84	KFZ67_12535	30	K	K00609	pyrB, PYR2; aspartate carbamoyltransferase catalytic subunit [EC:2.1.3.2]	Aspartate carbamoyltransferase OS=Photobacterium damsela subsp. piscicida OX=38294 GN=pyrB PE=3 SV=1	pyrB	3	3.0556	3	DELELVVETAGK(1)LK	1	6.04974e-07	90.412	1	6.04974e-07	90.412	1	6.99352e-05
map00240 Pyrimidine metabolism	0.00877237	1.84	KFZ67_12535	280	K	K00609	pyrB, PYR2; aspartate carbamoyltransferase catalytic subunit [EC:2.1.3.2]	Aspartate carbamoyltransferase OS=Photobacterium damsela subsp. piscicida OX=38294 GN=pyrB PE=3 SV=1	pyrB	3	-0.28782	3	IDEITTDVDK(1)TPHAYYFQQAENGVYAR	1	7.8805e-08	63.701	1	4.62148e-06	56.688	1	7.8805e-08
map00240 Pyrimidine metabolism	0.00877237	1.84	KFZ67_12535	43	K	K00609	pyrB, PYR2; aspartate carbamoyltransferase catalytic subunit [EC:2.1.3.2]	Aspartate carbamoyltransferase OS=Photobacterium damsela subsp. piscicida OX=38294 GN=pyrB PE=3 SV=1	pyrB	2	-2.6208	6	NK(1)VVASCFFEPSTR	1	2.0176e-31	150.11	1	2.0176e-31	150.11	1	1.25576e-23
map00240 Pyrimidine metabolism	0.00877237	1.84	KFZ67_12540	93	K	K00610	pyrI; aspartate carbamoyltransferase regulatory subunit	Aspartate carbamoyltransferase regulatory chain OS=Photobacterium damsela subsp. piscicida OX=38294 GN=pyrI PE=3 SV=1	pyrI	2	0.80341	3	ATVNQIENYEVVK(1)K	1	7.86354e-05	73.415	1	0.000158826	68.972	1	7.86354e-05
map00240 Pyrimidine metabolism	0.00877237	1.84	KFZ67_12540	13	K	K00610	pyrI; aspartate carbamoyltransferase regulatory subunit	Aspartate carbamoyltransferase regulatory chain OS=Photobacterium damsela subsp. piscicida OX=38294 GN=pyrI PE=3 SV=1	pyrI	3	-1.3928	4	LQVEAIK(1)NGSVIDHIPANIGIK	1	1.395e-10	76.492	1	1.395e-10	76.492	1	5.98323e-07
map00240 Pyrimidine metabolism	0.00877237	1.84	KFZ67_12540	31	K	K00610	pyrI; aspartate carbamoyltransferase regulatory subunit	Aspartate carbamoyltransferase regulatory chain OS=Photobacterium damsela subsp. piscicida OX=38294 GN=pyrI PE=3 SV=1	pyrI	3	-0.23113	3	VLK(1)LFGMHK	1	0.0212044	42.311	1	0.0212044	42.311	1	0.0235481
map00240 Pyrimidine metabolism	0.00877237	1.84	KFZ67_12540	143	K	K00610	pyrI; aspartate carbamoyltransferase regulatory subunit	Aspartate carbamoyltransferase regulatory chain OS=Photobacterium damsela subsp. piscicida OX=38294 GN=pyrI PE=3 SV=1	pyrI	2	-0.53255	7	YCEK(1)VFSR	1	1.67406e-16	138.78	1	2.9976e-07	117.89	1	1.67406e-16
map00240 Pyrimidine metabolism	0.00877237	1.84	KFZ67_13130	201	K	K01119	cpdB; 2',3'-cyclic-nucleotide 2'-phosphodiesterase / 3'-nucleotidase [EC:3.1.4.16 3.1.3.6]	2',3'-cyclic-nucleotide 2'-phosphodiesterase OS=Photobacterium damselae OX=38293 GN=cpdB PE=3 SV=1	cpdB	2	0.053078	3	NLEGK(1)VEAK	1	0.00388921	64.374	1	0.00388921	64.374	1	0.00977403
map00240 Pyrimidine metabolism	0.00877237	1.84	KFZ67_17975	27	K	K03784	deoD; purine-nucleoside phosphorylase [EC:2.4.2.1]	Purine nucleoside phosphorylase DeoD-type OS=Photobacterium damselae OX=38293 GN=deoD PE=3 SV=1	deoD	2	0.36151	3	AK(1)FIAETYLEDAK	1	0.000265352	71.513	1	0.000696865	61.409	1	0.000265352
map00250 Alanine, aspartate and glutamate metabolism	0.0249552	1.77	KFZ67_02865	28	K	K01580	E4.1.1.15, gadB, gadA, GAD; glutamate decarboxylase [EC:4.1.1.15]	Glutamate decarboxylase OS=Photobacterium damselae subsp. damselae OX=85581 GN=gadA PE=3 SV=1	gadA	3	1.521	5	EQGADPIFGSDALSHIASSK(1)K	1	7.9544e-16	91.276	1	9.90997e-16	89.663	1	7.9544e-16
map00250 Alanine, aspartate and glutamate metabolism	0.0249552	1.77	KFZ67_02865	29	K	K01580	E4.1.1.15, gadB, gadA, GAD; glutamate decarboxylase [EC:4.1.1.15]	Glutamate decarboxylase OS=Photobacterium damselae subsp. damselae OX=85581 GN=gadA PE=3 SV=1	gadA	3	-2.6209	3	K(1)MPQQEQSPQAIYQMIR	1	2.70225e-06	68.481	1	9.05945e-05	52.172	1	2.70225e-06
map00250 Alanine, aspartate and glutamate metabolism	0.0249552	1.77	KFZ67_02865	423	K	K01580	E4.1.1.15, gadB, gadA, GAD; glutamate decarboxylase [EC:4.1.1.15]	Glutamate decarboxylase OS=Photobacterium damselae subsp. damselae OX=85581 GN=gadA PE=3 SV=1	gadA	3	-1.5077	4	ILVK(1)QGFSQDLANLLIK	1	1.39452e-06	71.354	1	9.56032e-06	60.489	1	1.39452e-06
map00250 Alanine, aspartate and glutamate metabolism	0.0249552	1.77	KFZ67_02870	298	K	K01425	glsA, GLS; glutaminase [EC:3.5.1.2]	Glutaminase OS=Photobacterium damselae OX=38293 GN=glsA PE=3 SV=1	glsA	2	0.47754	8	GQLMIK(1)QVAK	1	0.00108223	68.657	1	0.00275616	59.908	1	0.00108223
map00250 Alanine, aspartate and glutamate metabolism	0.0249552	1.77	KFZ67_02870	286	K	K01425	glsA, GLS; glutaminase [EC:3.5.1.2]	Glutaminase OS=Photobacterium damselae OX=38293 GN=glsA PE=3 SV=1	glsA	2	2.6837	2	LDK(1)YGNSVR	1	0.00166817	77.14	1	0.00166817	77.14	1	0.0038011
map00250 Alanine, aspartate and glutamate metabolism	0.0249552	1.77	KFZ67_08360	330	K	K00259	ald; alanine dehydrogenase [EC:1.4.1.1]	Alanine dehydrogenase OS=Photobacterium damselae OX=38293 GN=ald PE=3 SV=1	ald	2	0.18792	3	LANMGYK(1)K	1	0.00441826	75.213	1	0.00441826	75.213	1	0.00441826
map00250 Alanine, aspartate and glutamate metabolism	0.0249552	1.77	KFZ67_08360	256	K	K00259	ald; alanine dehydrogenase [EC:1.4.1.1]	Alanine dehydrogenase OS=Photobacterium damselae OX=38293 GN=ald PE=3 SV=1	ald	2	0.39955	8	LVTADMIK(1)K	1	0.000754194	83.998	1	0.00202251	72.607	1	0.000754194
map00250 Alanine, aspartate and glutamate metabolism	0.0249552	1.77	KFZ67_08360	7	K	K00259	ald; alanine dehydrogenase [EC:1.4.1.1]	Alanine dehydrogenase OS=Photobacterium damselae OX=38293 GN=ald PE=3 SV=1	ald	2	-0.65031	6	MIIGVPK(1)EIK	1	0.00126658	63.624	1	0.00363601	57.149	1	0.00126658
map00250 Alanine, aspartate and glutamate metabolism	0.0249552	1.77	KFZ67_08360	151	K	K00259	ald; alanine dehydrogenase [EC:1.4.1.1]	Alanine dehydrogenase OS=Photobacterium damselae OX=38293 GN=ald PE=3 SV=1	ald	3	-0.94496	6	MSIQAGALALEK(1)SHGGK	1	8.61424e-13	103.13	1	8.61424e-13	103.13	1	1.54058e-09
map00250 Alanine, aspartate and glutamate metabolism	0.0249552	1.77	KFZ67_10075	391	K	K01953	asnB, ASNS; asparagine synthase (glutamine-hydrolysing) [EC:6.3.5.4]	Asparagine synthase B OS=Photobacterium damselae OX=38293 GN=asnB PE=4 SV=1	asnB	2	-0.26724	2	ANK(1)SMAAWGIEAR	1	0.00137933	53.592	1	0.00370953	45.207	1	0.00137933
map00250 Alanine, aspartate and glutamate metabolism	0.0249552	1.77	KFZ67_10075	430	K	K01953	asnB, ASNS; asparagine synthase (glutamine-hydrolysing) [EC:6.3.5.4]	Asparagine synthase B OS=Photobacterium damselae OX=38293 GN=asnB PE=4 SV=1	asnB	2	-0.62937	3	IEK(1)HIIR	1	6.91518e-23	152.47	1	6.91518e-23	152.47	1	1.21223e-22
map00250 Alanine, aspartate and glutamate metabolism	0.0249552	1.77	KFZ67_12020	862	K	K01955	carB, CPA2; carbamoyl-phosphate synthase large subunit [EC:6.3.5.5]	Carbamoyl-phosphate synthase large chain OS=Photobacterium damselae OX=38293 GN=carB PE=3 SV=1	carB	2	1.3258	3	ATGAPLAK(1)IAAR	1	0.0008409	65.179	1	0.0008409	65.179	1	0.0008409
map00250 Alanine, aspartate and glutamate metabolism	0.0249552	1.77	KFZ67_12020	527	K	K01955	carB, CPA2; carbamoyl-phosphate synthase large subunit [EC:6.3.5.5]	Carbamoyl-phosphate synthase large chain OS=Photobacterium damselae OX=38293 GN=carB PE=3 SV=1	carB	3	0.69896	3	DQYNIHPVYK(1)R	1	0.000247754	75.088	1	0.000247754	75.088	1	0.000951988
map00250 Alanine, aspartate and glutamate metabolism	0.0249552	1.77	KFZ67_12020	962	K	K01955	carB, CPA2; carbamoyl-phosphate synthase large subunit [EC:6.3.5.5]	Carbamoyl-phosphate synthase large chain OS=Photobacterium damselae OX=38293 GN=carB PE=3 SV=1	carB	2	-0.49538	2	VVDLASK(1)LIK	1	0.00603875	53.237	1	0.00603875	53.237	1	0.0122454
map00250 Alanine, aspartate and glutamate metabolism	0.0249552	1.77	KFZ67_12025	330	K	K01956	carA, CPA1; carbamoyl-phosphate synthase small subunit [EC:6.3.5.5]	Carbamoyl-phosphate synthase small chain OS=Photobacterium damsela subsp. piscicida OX=38294 GN=carA PE=3 SV=1	carA	4	-1.7003	5	ATHK(1)SLFDGSLQGIHR	1	1.91518e-08	88.768	1	1.58591e-06	77.746	1	1.91518e-08
map00250 Alanine, aspartate and glutamate metabolism	0.0249552	1.77	KFZ67_12535	30	K	K00609	pyrB, PYR2; aspartate carbamoyltransferase catalytic subunit [EC:2.1.3.2]	Aspartate carbamoyltransferase OS=Photobacterium damsela subsp. piscicida OX=38294 GN=pyrB PE=3 SV=1	pyrB	3	3.0556	3	DELELVVETAGK(1)LK	1	6.04974e-07	90.412	1	6.04974e-07	90.412	1	6.99352e-05
map00250 Alanine, aspartate and glutamate metabolism	0.0249552	1.77	KFZ67_12535	280	K	K00609	pyrB, PYR2; aspartate carbamoyltransferase catalytic subunit [EC:2.1.3.2]	Aspartate carbamoyltransferase OS=Photobacterium damsela subsp. piscicida OX=38294 GN=pyrB PE=3 SV=1	pyrB	3	-0.28782	3	IDEITTDVDK(1)TPHAYYFQQAENGVYAR	1	7.8805e-08	63.701	1	4.62148e-06	56.688	1	7.8805e-08
map00250 Alanine, aspartate and glutamate metabolism	0.0249552	1.77	KFZ67_12535	43	K	K00609	pyrB, PYR2; aspartate carbamoyltransferase catalytic subunit [EC:2.1.3.2]	Aspartate carbamoyltransferase OS=Photobacterium damsela subsp. piscicida OX=38294 GN=pyrB PE=3 SV=1	pyrB	2	-2.6208	6	NK(1)VVASCFFEPSTR	1	2.0176e-31	150.11	1	2.0176e-31	150.11	1	1.25576e-23
map00250 Alanine, aspartate and glutamate metabolism	0.0249552	1.77	KFZ67_12540	93	K	K00610	pyrI; aspartate carbamoyltransferase regulatory subunit	Aspartate carbamoyltransferase regulatory chain OS=Photobacterium damsela subsp. piscicida OX=38294 GN=pyrI PE=3 SV=1	pyrI	2	0.80341	3	ATVNQIENYEVVK(1)K	1	7.86354e-05	73.415	1	0.000158826	68.972	1	7.86354e-05
map00250 Alanine, aspartate and glutamate metabolism	0.0249552	1.77	KFZ67_12540	13	K	K00610	pyrI; aspartate carbamoyltransferase regulatory subunit	Aspartate carbamoyltransferase regulatory chain OS=Photobacterium damsela subsp. piscicida OX=38294 GN=pyrI PE=3 SV=1	pyrI	3	-1.3928	4	LQVEAIK(1)NGSVIDHIPANIGIK	1	1.395e-10	76.492	1	1.395e-10	76.492	1	5.98323e-07
map00250 Alanine, aspartate and glutamate metabolism	0.0249552	1.77	KFZ67_12540	31	K	K00610	pyrI; aspartate carbamoyltransferase regulatory subunit	Aspartate carbamoyltransferase regulatory chain OS=Photobacterium damsela subsp. piscicida OX=38294 GN=pyrI PE=3 SV=1	pyrI	3	-0.23113	3	VLK(1)LFGMHK	1	0.0212044	42.311	1	0.0212044	42.311	1	0.0235481
map00250 Alanine, aspartate and glutamate metabolism	0.0249552	1.77	KFZ67_12540	143	K	K00610	pyrI; aspartate carbamoyltransferase regulatory subunit	Aspartate carbamoyltransferase regulatory chain OS=Photobacterium damsela subsp. piscicida OX=38294 GN=pyrI PE=3 SV=1	pyrI	2	-0.53255	7	YCEK(1)VFSR	1	1.67406e-16	138.78	1	2.9976e-07	117.89	1	1.67406e-16
map00250 Alanine, aspartate and glutamate metabolism	0.0249552	1.77	KFZ67_13285	19	K	K01939	purA, ADSS; adenylosuccinate synthase [EC:6.3.4.4]	Adenylosuccinate synthetase OS=Photobacterium damsela subsp. piscicida OX=38294 GN=purA PE=3 SV=1	purA	2	0.42626	4	GK(1)IVDLLTEDAK	1	4.77979e-06	92.792	1	0.000636333	68.121	1	4.77979e-06
map00250 Alanine, aspartate and glutamate metabolism	0.0249552	1.77	KFZ67_13285	432	K	K01939	purA, ADSS; adenylosuccinate synthase [EC:6.3.4.4]	Adenylosuccinate synthetase OS=Photobacterium damsela subsp. piscicida OX=38294 GN=purA PE=3 SV=1	purA	2	-1.3236	5	NETIIK(1)VHPYGE	1	0.000191371	77.279	1	0.000499508	70.089	1	0.000191371
map00250 Alanine, aspartate and glutamate metabolism	0.0249552	1.77	KFZ67_13525	402	K	K01744	aspA; aspartate ammonia-lyase [EC:4.3.1.1]	Aspartate ammonia-lyase OS=Photobacterium damselae OX=38293 GN=aspA PE=3 SV=1	aspA	2	-2.0856	6	DK(1)CIDGITVNK	1	0.0007054	69.864	1	0.00333928	55.188	1	0.0007054
map00250 Alanine, aspartate and glutamate metabolism	0.0249552	1.77	KFZ67_13525	139	K	K01744	aspA; aspartate ammonia-lyase [EC:4.3.1.1]	Aspartate ammonia-lyase OS=Photobacterium damselae OX=38293 GN=aspA PE=3 SV=1	aspA	2	-0.29377	4	EK(1)GEYSIVNPNDHVNK	1	1.38789e-05	62.949	1	1.38789e-05	62.949	1	0.000135072
map00250 Alanine, aspartate and glutamate metabolism	0.0249552	1.77	KFZ67_13525	153	K	K01744	aspA; aspartate ammonia-lyase [EC:4.3.1.1]	Aspartate ammonia-lyase OS=Photobacterium damselae OX=38293 GN=aspA PE=3 SV=1	aspA	3	-1.316	7	GEYSIVNPNDHVNK(1)SQSTNCAYPTGFR	1	2.51074e-25	109.23	1	1.58248e-17	94.594	1	2.51074e-25
map00250 Alanine, aspartate and glutamate metabolism	0.0249552	1.77	KFZ67_13525	68	K	K01744	aspA; aspartate ammonia-lyase [EC:4.3.1.1]	Aspartate ammonia-lyase OS=Photobacterium damselae OX=38293 GN=aspA PE=3 SV=1	aspA	2	0.19671	3	GMVFTK(1)K	1	0.01078	80.462	1	0.0207989	68.915	1	0.01078
map00250 Alanine, aspartate and glutamate metabolism	0.0249552	1.77	KFZ67_13525	306	K	K01744	aspA; aspartate ammonia-lyase [EC:4.3.1.1]	Aspartate ammonia-lyase OS=Photobacterium damselae OX=38293 GN=aspA PE=3 SV=1	aspA	2	0.68474	5	LSK(1)ICNDLR	1	5.40712e-17	140.45	1	3.62306e-05	105.2	1	5.40712e-17
map00250 Alanine, aspartate and glutamate metabolism	0.0249552	1.77	KFZ67_15090	26	K	K01437	ASPA, aspA; aspartoacylase [EC:3.5.1.15]	Aspartoacylase OS=Photobacterium damselae subsp. damselae OX=85581 GN=EQ875_01098 PE=3 SV=1	EQ875_01098	2	2.1322	2	K(1)WQQQPQSISR	1	1.68e-05	87.184	1	0.000643171	69.721	1	1.68e-05
map00250 Alanine, aspartate and glutamate metabolism	0.0249552	1.77	KFZ67_17310	390	K	K13821	putA; RHH-type transcriptional regulator, proline utilization regulon repressor / proline dehydrogenase / delta 1-pyrroline-5-carboxylate dehydrogenase [EC:1.5.5.2 1.2.1.88]	Bifunctional protein PutA OS=Photobacterium damselae subsp. damselae OX=85581 GN=putA PE=3 SV=1	putA	2	-1.0694	8	K(1)EATDCAYLACAR	1	1.56176e-09	100.22	1	1.56176e-09	100.22	1	1.56176e-09
map00250 Alanine, aspartate and glutamate metabolism	0.0249552	1.77	KFZ67_17310	167	K	K13821	putA; RHH-type transcriptional regulator, proline utilization regulon repressor / proline dehydrogenase / delta 1-pyrroline-5-carboxylate dehydrogenase [EC:1.5.5.2 1.2.1.88]	Bifunctional protein PutA OS=Photobacterium damselae subsp. damselae OX=85581 GN=putA PE=3 SV=1	putA	2	-0.22561	2	LVNK(1)LSEPVVR	1	0.00233595	58.511	1	0.0124802	43.604	1	0.00233595
map00260 Glycine, serine and threonine metabolism	0.168807	1.41	KFZ67_00790	85	K	K15633	gpmI; 2,3-bisphosphoglycerate-independent phosphoglycerate mutase [EC:5.4.2.12]	2,3-bisphosphoglycerate-independent phosphoglycerate mutase OS=Photobacterium damselae OX=38293 GN=gpmI PE=3 SV=1	gpmI	3	1.0038	4	ITK(1)AISDGEFFENDVLVAAMDAAIK	1	1.0874e-07	69.284	1	1.0874e-07	69.284	1	3.09664e-05
map00260 Glycine, serine and threonine metabolism	0.168807	1.41	KFZ67_00790	5	K	K15633	gpmI; 2,3-bisphosphoglycerate-independent phosphoglycerate mutase [EC:5.4.2.12]	2,3-bisphosphoglycerate-independent phosphoglycerate mutase OS=Photobacterium damselae OX=38293 GN=gpmI PE=3 SV=1	gpmI	3	0.59951	3	K(1)PLALVILDGWGYR	1	7.4024e-10	98.337	1	7.4024e-10	98.337	1	4.98505e-05
map00260 Glycine, serine and threonine metabolism	0.168807	1.41	KFZ67_00790	480	K	K15633	gpmI; 2,3-bisphosphoglycerate-independent phosphoglycerate mutase [EC:5.4.2.12]	2,3-bisphosphoglycerate-independent phosphoglycerate mutase OS=Photobacterium damselae OX=38293 GN=gpmI PE=3 SV=1	gpmI	2	1.5935	4	SLTLK(1)DNGK	1	4.4525e-24	148.52	1	4.99976e-24	147.2	1	4.4525e-24
map00260 Glycine, serine and threonine metabolism	0.168807	1.41	KFZ67_01985	256	K	K00382	DLD, lpd, pdhD; dihydrolipoamide dehydrogenase [EC:1.8.1.4]	Dihydrolipoyl dehydrogenase OS=Photobacterium damselae OX=38293 GN=lpdA PE=3 SV=1	lpdA	2	0.49886	3	EDGIYVSMEGK(1)K	1	0.000201095	75.739	1	0.000201095	75.739	1	0.00026044
map00260 Glycine, serine and threonine metabolism	0.168807	1.41	KFZ67_01985	300	K	K00382	DLD, lpd, pdhD; dihydrolipoamide dehydrogenase [EC:1.8.1.4]	Dihydrolipoyl dehydrogenase OS=Photobacterium damselae OX=38293 GN=lpdA PE=3 SV=1	lpdA	2	-0.61459	7	GFIHVDK(1)QMR	1	1.1894e-07	114.97	1	0.000187872	89.679	1	1.1894e-07
map00260 Glycine, serine and threonine metabolism	0.168807	1.41	KFZ67_01985	285	K	K00382	DLD, lpd, pdhD; dihydrolipoamide dehydrogenase [EC:1.8.1.4]	Dihydrolipoyl dehydrogenase OS=Photobacterium damselae OX=38293 GN=lpdA PE=3 SV=1	lpdA	2	0.00077076	3	LLDAEK(1)AGIEVDER	1	1.16173e-06	87.519	1	1.16173e-06	87.519	1	1.50465e-05
map00260 Glycine, serine and threonine metabolism	0.168807	1.41	KFZ67_01985	152	K	K00382	DLD, lpd, pdhD; dihydrolipoamide dehydrogenase [EC:1.8.1.4]	Dihydrolipoyl dehydrogenase OS=Photobacterium damselae OX=38293 GN=lpdA PE=3 SV=1	lpdA	3	-0.61856	2	PIK(1)LPFIPHEDPR	1	0.000130685	73.927	1	0.000391848	65.043	1	0.000130685
map00260 Glycine, serine and threonine metabolism	0.168807	1.41	KFZ67_01985	279	K	K00382	DLD, lpd, pdhD; dihydrolipoamide dehydrogenase [EC:1.8.1.4]	Dihydrolipoyl dehydrogenase OS=Photobacterium damselae OX=38293 GN=lpdA PE=3 SV=1	lpdA	2	-0.014866	6	VPNGK(1)LLDAEK	1	7.26591e-06	94.402	1	7.26591e-06	94.402	1	6.00796e-05
map00260 Glycine, serine and threonine metabolism	0.168807	1.41	KFZ67_02395	9	K	K02437	gcvH, GCSH; glycine cleavage system H protein	Glycine cleavage system H protein OS=Photobacterium damselae OX=38293 GN=gcvH PE=3 SV=1	gcvH	4	-0.53551	3	SYVPSDLK(1)FTHSHEWVR	1	1.30603e-12	99.747	1	1.30603e-12	99.747	1	3.53027e-10
map00260 Glycine, serine and threonine metabolism	0.168807	1.41	KFZ67_04260	166	K	K00133	asd; aspartate-semialdehyde dehydrogenase [EC:1.2.1.11]	Aspartate-semialdehyde dehydrogenase OS=Photobacterium damsela subsp. piscicida OX=38294 GN=asd PE=3 SV=1	asd	2	-0.3557	3	INVATYQSVSGSGK(1)K	1	5.27389e-09	96.673	1	5.12514e-08	86.497	1	5.27389e-09
map00260 Glycine, serine and threonine metabolism	0.168807	1.41	KFZ67_06725	23	K	K00639	kbl, GCAT; glycine C-acetyltransferase [EC:2.3.1.29]	2-amino-3-ketobutyrate coenzyme A ligase OS=Photobacterium damselae OX=38293 GN=kbl PE=3 SV=1	kbl	2	2.373	2	TEGLYK(1)SER	1	0.00362928	50.353	1	0.00362928	50.194	1	0.0131687
map00260 Glycine, serine and threonine metabolism	0.168807	1.41	KFZ67_11120	345	K	K00600	glyA, SHMT; glycine hydroxymethyltransferase [EC:2.1.2.1]	Serine hydroxymethyltransferase OS=Photobacterium damsela subsp. piscicida OX=38294 GN=glyA PE=3 SV=1	glyA	3	-0.038057	4	EADAALGAANITVNK(1)NSVPNDPR	1	6.56601e-45	143.4	1	6.56601e-45	143.4	1	2.16302e-35
map00260 Glycine, serine and threonine metabolism	0.168807	1.41	KFZ67_11120	330	K	K00600	glyA, SHMT; glycine hydroxymethyltransferase [EC:2.1.2.1]	Serine hydroxymethyltransferase OS=Photobacterium damsela subsp. piscicida OX=38294 GN=glyA PE=3 SV=1	glyA	3	-0.81801	3	GITGK(1)EADAALGAANITVNK	1	1.61841e-10	82.482	1	1.61841e-10	82.482	1	6.2005e-10
map00260 Glycine, serine and threonine metabolism	0.168807	1.41	KFZ67_11120	325	K	K00600	glyA, SHMT; glycine hydroxymethyltransferase [EC:2.1.2.1]	Serine hydroxymethyltransferase OS=Photobacterium damsela subsp. piscicida OX=38294 GN=glyA PE=3 SV=1	glyA	3	-0.2402	3	IVSGSTENHLFLVDLIDK(1)GITGK	1	1.83922e-11	83.826	1	2.09806e-07	69.071	1	1.83922e-11
map00260 Glycine, serine and threonine metabolism	0.168807	1.41	KFZ67_11120	410	K	K00600	glyA, SHMT; glycine hydroxymethyltransferase [EC:2.1.2.1]	Serine hydroxymethyltransferase OS=Photobacterium damsela subsp. piscicida OX=38294 GN=glyA PE=3 SV=1	glyA	2	0.7709	4	VLEICK(1)R	1	1.18019e-06	119.57	1	1.18019e-06	119.57	1	0.000192935
map00260 Glycine, serine and threonine metabolism	0.168807	1.41	KFZ67_11120	62	K	K00600	glyA, SHMT; glycine hydroxymethyltransferase [EC:2.1.2.1]	Serine hydroxymethyltransferase OS=Photobacterium damsela subsp. piscicida OX=38294 GN=glyA PE=3 SV=1	glyA	2	-0.91322	5	YAEGYPGK(1)R	1	7.58099e-08	120.15	1	1.51613e-07	117.89	1	7.58099e-08
map00260 Glycine, serine and threonine metabolism	0.168807	1.41	KFZ67_12220	266	K	K01733	thrC; threonine synthase [EC:4.2.3.1]	Threonine synthase OS=Photobacterium damselae OX=38293 GN=BST98_12205 PE=4 SV=1	BST98_12205	2	0.3896	3	AIGLPVK(1)R	1	0.000849655	89.55	1	0.0030927	79.469	1	0.000849655
map00260 Glycine, serine and threonine metabolism	0.168807	1.41	KFZ67_19420	922	K	K00281	GLDC, gcvP; glycine dehydrogenase [EC:1.4.4.2]	Glycine dehydrogenase (decarboxylating) OS=Photobacterium damselae subsp. damselae OX=85581 GN=gcvP PE=3 SV=1	gcvP	2	1.3758	2	ELACFPAK(1)HSR	1	0.000257698	77.124	1	0.000257698	77.124	1	0.00492508
map00260 Glycine, serine and threonine metabolism	0.168807	1.41	KFZ67_19420	789	K	K00281	GLDC, gcvP; glycine dehydrogenase [EC:1.4.4.2]	Glycine dehydrogenase (decarboxylating) OS=Photobacterium damselae subsp. damselae OX=85581 GN=gcvP PE=3 SV=1	gcvP	2	0.69461	3	LAILNANYVK(1)AK	1	0.00126184	60.255	1	0.00275197	51.979	1	0.00126184
map00260 Glycine, serine and threonine metabolism	0.168807	1.41	KFZ67_19420	303	K	K00281	GLDC, gcvP; glycine dehydrogenase [EC:1.4.4.2]	Glycine dehydrogenase (decarboxylating) OS=Photobacterium damselae subsp. damselae OX=85581 GN=gcvP PE=3 SV=1	gcvP	2	1.2073	6	VIGVSK(1)DSQGNQALR	1	3.70617e-37	156.81	1	3.70617e-37	156.81	1	1.09313e-28
map00260 Glycine, serine and threonine metabolism	0.168807	1.41	KFZ67_19420	928	K	K00281	GLDC, gcvP; glycine dehydrogenase [EC:1.4.4.2]	Glycine dehydrogenase (decarboxylating) OS=Photobacterium damselae subsp. damselae OX=85581 GN=gcvP PE=3 SV=1	gcvP	2	3.2582	4	YSK(1)YWPTVNR	1	0.000300981	84.687	1	0.00108372	70.942	1	0.000300981
map00260 Glycine, serine and threonine metabolism	0.168807	1.41	KFZ67_19430	85	K	K00605	gcvT, AMT; aminomethyltransferase [EC:2.1.2.10]	Aminomethyltransferase OS=Photobacterium damselae subsp. damselae OX=85581 GN=gcvT PE=3 SV=1	gcvT	3	-0.027891	4	LVPVDIIDLPVGK(1)QR	1	1.06058e-05	69.92	1	1.06058e-05	69.92	1	0.000752723
map00261 Monobactam biosynthesis	0.0488781	2.28	KFZ67_03440	153	K	K01714	dapA; 4-hydroxy-tetrahydrodipicolinate synthase [EC:4.3.3.7]	4-hydroxy-tetrahydrodipicolinate synthase OS=Photobacterium damselae OX=38293 GN=dapA PE=3 SV=1	dapA	2	-1.0287	3	LAK(1)LDNIIGIK	1	0.000328187	74.611	1	0.00475922	50.484	1	0.000328187
map00261 Monobactam biosynthesis	0.0488781	2.28	KFZ67_04260	166	K	K00133	asd; aspartate-semialdehyde dehydrogenase [EC:1.2.1.11]	Aspartate-semialdehyde dehydrogenase OS=Photobacterium damsela subsp. piscicida OX=38294 GN=asd PE=3 SV=1	asd	2	-0.3557	3	INVATYQSVSGSGK(1)K	1	5.27389e-09	96.673	1	5.12514e-08	86.497	1	5.27389e-09
map00261 Monobactam biosynthesis	0.0488781	2.28	KFZ67_12030	93	K	K00215	dapB; 4-hydroxy-tetrahydrodipicolinate reductase [EC:1.17.1.8]	4-hydroxy-tetrahydrodipicolinate reductase OS=Photobacterium damselae OX=38293 GN=dapB PE=3 SV=1	dapB	3	0.033065	6	AHQK(1)AIVIGTTGFTEQER	1	1.20668e-15	102.55	1	1.10197e-11	88.637	1	1.20668e-15
map00261 Monobactam biosynthesis	0.0488781	2.28	KFZ67_13115	362	K	K00956	cysN; sulfate adenylyltransferase subunit 1 [EC:2.7.7.4]	Sulfate adenylyltransferase subunit 1 OS=Photobacterium damselae OX=38293 GN=cysN PE=3 SV=1	cysN	3	1.2031	5	IAGNK(1)TQGQVIGFEHQIDINK	1	5.92562e-11	82.635	1	6.81326e-07	64.522	1	5.92562e-11
map00261 Monobactam biosynthesis	0.0488781	2.28	KFZ67_13115	459	K	K00956	cysN; sulfate adenylyltransferase subunit 1 [EC:2.7.7.4]	Sulfate adenylyltransferase subunit 1 OS=Photobacterium damselae OX=38293 GN=cysN PE=3 SV=1	cysN	3	-0.477	3	K(1)HFPHWNSSDISK	1	0.000240764	70.563	1	0.000278187	70.438	1	0.000240764
map00261 Monobactam biosynthesis	0.0488781	2.28	KFZ67_13115	24	K	K00956	cysN; sulfate adenylyltransferase subunit 1 [EC:2.7.7.4]	Sulfate adenylyltransferase subunit 1 OS=Photobacterium damselae OX=38293 GN=cysN PE=3 SV=1	cysN	4	-0.41155	3	MNHAIQQQVAELGIEAYLDQHQNK(1)SLLR	1	7.1067e-36	119.87	1	3.02955e-35	111.55	1	7.1067e-36
map00261 Monobactam biosynthesis	0.0488781	2.28	KFZ67_13115	278	K	K00956	cysN; sulfate adenylyltransferase subunit 1 [EC:2.7.7.4]	Sulfate adenylyltransferase subunit 1 OS=Photobacterium damselae OX=38293 GN=cysN PE=3 SV=1	cysN	2	-0.79996	2	VK(1)VLPSEK	1	5.78584e-05	105.1	1	0.000131841	98.582	1	5.78584e-05
map00261 Monobactam biosynthesis	0.0488781	2.28	KFZ67_13115	284	K	K00956	cysN; sulfate adenylyltransferase subunit 1 [EC:2.7.7.4]	Sulfate adenylyltransferase subunit 1 OS=Photobacterium damselae OX=38293 GN=cysN PE=3 SV=1	cysN	2	0.8084	4	VLPSEK(1)ESYIER	1	9.67751e-14	125.54	1	9.67751e-14	125.54	1	1.02819e-05
map00261 Monobactam biosynthesis	0.0488781	2.28	KFZ67_13115	105	K	K00956	cysN; sulfate adenylyltransferase subunit 1 [EC:2.7.7.4]	Sulfate adenylyltransferase subunit 1 OS=Photobacterium damselae OX=38293 GN=cysN PE=3 SV=1	cysN	2	0.17473	2	YFSTQK(1)R	1	0.000192935	107.43	1	0.000192935	107.43	1	0.000263532
map00261 Monobactam biosynthesis	0.0488781	2.28	KFZ67_13120	115	K	K00957	cysD; sulfate adenylyltransferase subunit 2 [EC:2.7.7.4]	Sulfate adenylyltransferase subunit 2 OS=Photobacterium damselae OX=38293 GN=cysD PE=3 SV=1	cysD	2	2.5314	5	HTDIMK(1)TQALK	1	2.56317e-27	154.28	1	2.56317e-27	154.28	1	2.47953e-13
map00261 Monobactam biosynthesis	0.0488781	2.28	KFZ67_13120	120	K	K00957	cysD; sulfate adenylyltransferase subunit 2 [EC:2.7.7.4]	Sulfate adenylyltransferase subunit 2 OS=Photobacterium damselae OX=38293 GN=cysD PE=3 SV=1	cysD	3	1.5478	3	TQALK(1)QALNQYGFDAAFGGAR	1	5.69251e-27	111.93	1	5.69251e-27	111.93	1	4.02357e-21
map00261 Monobactam biosynthesis	0.0488781	2.28	KFZ67_13120	82	K	K00957	cysD; sulfate adenylyltransferase subunit 2 [EC:2.7.7.4]	Sulfate adenylyltransferase subunit 2 OS=Photobacterium damselae OX=38293 GN=cysD PE=3 SV=1	cysD	3	0.25407	5	K(1)YGFELLVHK	1	0.000633938	73.499	1	0.000633938	73.499	1	0.000633938
map00261 Monobactam biosynthesis	0.0488781	2.28	KFZ67_13120	238	K	K00957	cysD; sulfate adenylyltransferase subunit 2 [EC:2.7.7.4]	Sulfate adenylyltransferase subunit 2 OS=Photobacterium damselae OX=38293 GN=cysD PE=3 SV=1	cysD	2	-1.8278	7	MPLTDSDK(1)VEQK	1	8.62978e-06	88.021	1	0.000374447	71.888	1	8.62978e-06
map00261 Monobactam biosynthesis	0.0488781	2.28	KFZ67_13120	177	K	K00957	cysD; sulfate adenylyltransferase subunit 2 [EC:2.7.7.4]	Sulfate adenylyltransferase subunit 2 OS=Photobacterium damselae OX=38293 GN=cysD PE=3 SV=1	cysD	2	-0.80529	5	TYNGQINK(1)GESIR	1	7.87231e-17	124.07	1	1.19737e-12	116.19	1	7.87231e-17
map00280 Valine, leucine and isoleucine degradation	0.439111	1.25	KFZ67_01985	256	K	K00382	DLD, lpd, pdhD; dihydrolipoamide dehydrogenase [EC:1.8.1.4]	Dihydrolipoyl dehydrogenase OS=Photobacterium damselae OX=38293 GN=lpdA PE=3 SV=1	lpdA	2	0.49886	3	EDGIYVSMEGK(1)K	1	0.000201095	75.739	1	0.000201095	75.739	1	0.00026044
map00280 Valine, leucine and isoleucine degradation	0.439111	1.25	KFZ67_01985	300	K	K00382	DLD, lpd, pdhD; dihydrolipoamide dehydrogenase [EC:1.8.1.4]	Dihydrolipoyl dehydrogenase OS=Photobacterium damselae OX=38293 GN=lpdA PE=3 SV=1	lpdA	2	-0.61459	7	GFIHVDK(1)QMR	1	1.1894e-07	114.97	1	0.000187872	89.679	1	1.1894e-07
map00280 Valine, leucine and isoleucine degradation	0.439111	1.25	KFZ67_01985	285	K	K00382	DLD, lpd, pdhD; dihydrolipoamide dehydrogenase [EC:1.8.1.4]	Dihydrolipoyl dehydrogenase OS=Photobacterium damselae OX=38293 GN=lpdA PE=3 SV=1	lpdA	2	0.00077076	3	LLDAEK(1)AGIEVDER	1	1.16173e-06	87.519	1	1.16173e-06	87.519	1	1.50465e-05
map00280 Valine, leucine and isoleucine degradation	0.439111	1.25	KFZ67_01985	152	K	K00382	DLD, lpd, pdhD; dihydrolipoamide dehydrogenase [EC:1.8.1.4]	Dihydrolipoyl dehydrogenase OS=Photobacterium damselae OX=38293 GN=lpdA PE=3 SV=1	lpdA	3	-0.61856	2	PIK(1)LPFIPHEDPR	1	0.000130685	73.927	1	0.000391848	65.043	1	0.000130685
map00280 Valine, leucine and isoleucine degradation	0.439111	1.25	KFZ67_01985	279	K	K00382	DLD, lpd, pdhD; dihydrolipoamide dehydrogenase [EC:1.8.1.4]	Dihydrolipoyl dehydrogenase OS=Photobacterium damselae OX=38293 GN=lpdA PE=3 SV=1	lpdA	2	-0.014866	6	VPNGK(1)LLDAEK	1	7.26591e-06	94.402	1	7.26591e-06	94.402	1	6.00796e-05
map00280 Valine, leucine and isoleucine degradation	0.439111	1.25	KFZ67_09505	28	K	K00626	E2.3.1.9, atoB; acetyl-CoA C-acetyltransferase [EC:2.3.1.9]	Acetyl-CoA C-acetyltransferase OS=Photobacterium damselae OX=38293 GN=CTM90_05090 PE=3 SV=1	CTM90_05090	2	-0.19634	3	DQAAGK(1)IAAEVIK	1	0.00072526	60.861	1	0.000903038	58.885	1	0.00072526
map00280 Valine, leucine and isoleucine degradation	0.439111	1.25	KFZ67_09505	345	K	K00626	E2.3.1.9, atoB; acetyl-CoA C-acetyltransferase [EC:2.3.1.9]	Acetyl-CoA C-acetyltransferase OS=Photobacterium damselae OX=38293 GN=CTM90_05090 PE=3 SV=1	CTM90_05090	4	1.9422	4	HQVEASDIIAK(1)ANLNGGAIALGHPLGASGNR	1	4.73063e-14	82.91	1	1.28533e-13	78.383	1	4.73063e-14
map00280 Valine, leucine and isoleucine degradation	0.439111	1.25	KFZ67_09505	10	K	K00626	E2.3.1.9, atoB; acetyl-CoA C-acetyltransferase [EC:2.3.1.9]	Acetyl-CoA C-acetyltransferase OS=Photobacterium damselae OX=38293 GN=CTM90_05090 PE=3 SV=1	CTM90_05090	2	0.69125	6	VFIVAAK(1)R	1	7.27634e-17	143	1	3.68027e-11	128.57	1	7.27634e-17
map00280 Valine, leucine and isoleucine degradation	0.439111	1.25	KFZ67_10375	366	K	K01782	fadJ; 3-hydroxyacyl-CoA dehydrogenase / enoyl-CoA hydratase / 3-hydroxybutyryl-CoA epimerase [EC:1.1.1.35 4.2.1.17 5.1.2.3]	Fatty acid oxidation complex subunit alpha OS=Photobacterium damselae OX=38293 GN=BST98_10320 PE=3 SV=1	BST98_10320	2	-0.46309	3	IISK(1)AQLQK	1	0.000320728	92.838	1	0.00155125	78.113	1	0.000320728
map00280 Valine, leucine and isoleucine degradation	0.439111	1.25	KFZ67_10375	232	K	K01782	fadJ; 3-hydroxyacyl-CoA dehydrogenase / enoyl-CoA hydratase / 3-hydroxybutyryl-CoA epimerase [EC:1.1.1.35 4.2.1.17 5.1.2.3]	Fatty acid oxidation complex subunit alpha OS=Photobacterium damselae OX=38293 GN=BST98_10320 PE=3 SV=1	BST98_10320	2	0.50631	3	SVVFDQAK(1)K	1	0.00393358	61.78	1	0.00484429	59.908	1	0.00393358
map00300 Lysine biosynthesis	0.126936	1.79	KFZ67_01065	311	K	K00821	argD; acetylornithine/N-succinyldiaminopimelate aminotransferase [EC:2.6.1.11 2.6.1.17]	Acetylornithine aminotransferase OS=Photobacterium damselae subsp. damselae OX=85581 GN=argD PE=3 SV=1	argD	3	0.26568	4	AAISEIIKPELLAGVK(1)ER	1	1.06545e-15	105.06	0.999999	1.67532e-11	87.24	1	1.06545e-15
map00300 Lysine biosynthesis	0.126936	1.79	KFZ67_02880	341	K	K00674	dapD; 2,3,4,5-tetrahydropyridine-2,6-dicarboxylate N-succinyltransferase [EC:2.3.1.117]	2,3,4,5-tetrahydropyridine-2,6-dicarboxylate N-succinyltransferase OS=Photobacterium damselae OX=38293 GN=dapD PE=3 SV=1	dapD	2	-0.37051	4	TAIELNSELHK(1)NN	1	1.13412e-11	110.08	1	5.9311e-07	95.417	1	1.13412e-11
map00300 Lysine biosynthesis	0.126936	1.79	KFZ67_03440	153	K	K01714	dapA; 4-hydroxy-tetrahydrodipicolinate synthase [EC:4.3.3.7]	4-hydroxy-tetrahydrodipicolinate synthase OS=Photobacterium damselae OX=38293 GN=dapA PE=3 SV=1	dapA	2	-1.0287	3	LAK(1)LDNIIGIK	1	0.000328187	74.611	1	0.00475922	50.484	1	0.000328187
map00300 Lysine biosynthesis	0.126936	1.79	KFZ67_04260	166	K	K00133	asd; aspartate-semialdehyde dehydrogenase [EC:1.2.1.11]	Aspartate-semialdehyde dehydrogenase OS=Photobacterium damsela subsp. piscicida OX=38294 GN=asd PE=3 SV=1	asd	2	-0.3557	3	INVATYQSVSGSGK(1)K	1	5.27389e-09	96.673	1	5.12514e-08	86.497	1	5.27389e-09
map00300 Lysine biosynthesis	0.126936	1.79	KFZ67_12030	93	K	K00215	dapB; 4-hydroxy-tetrahydrodipicolinate reductase [EC:1.17.1.8]	4-hydroxy-tetrahydrodipicolinate reductase OS=Photobacterium damselae OX=38293 GN=dapB PE=3 SV=1	dapB	3	0.033065	6	AHQK(1)AIVIGTTGFTEQER	1	1.20668e-15	102.55	1	1.10197e-11	88.637	1	1.20668e-15
map00310 Lysine degradation	0.054975	2.51	KFZ67_01985	256	K	K00382	DLD, lpd, pdhD; dihydrolipoamide dehydrogenase [EC:1.8.1.4]	Dihydrolipoyl dehydrogenase OS=Photobacterium damselae OX=38293 GN=lpdA PE=3 SV=1	lpdA	2	0.49886	3	EDGIYVSMEGK(1)K	1	0.000201095	75.739	1	0.000201095	75.739	1	0.00026044
map00310 Lysine degradation	0.054975	2.51	KFZ67_01985	300	K	K00382	DLD, lpd, pdhD; dihydrolipoamide dehydrogenase [EC:1.8.1.4]	Dihydrolipoyl dehydrogenase OS=Photobacterium damselae OX=38293 GN=lpdA PE=3 SV=1	lpdA	2	-0.61459	7	GFIHVDK(1)QMR	1	1.1894e-07	114.97	1	0.000187872	89.679	1	1.1894e-07
map00310 Lysine degradation	0.054975	2.51	KFZ67_01985	285	K	K00382	DLD, lpd, pdhD; dihydrolipoamide dehydrogenase [EC:1.8.1.4]	Dihydrolipoyl dehydrogenase OS=Photobacterium damselae OX=38293 GN=lpdA PE=3 SV=1	lpdA	2	0.00077076	3	LLDAEK(1)AGIEVDER	1	1.16173e-06	87.519	1	1.16173e-06	87.519	1	1.50465e-05
map00310 Lysine degradation	0.054975	2.51	KFZ67_01985	152	K	K00382	DLD, lpd, pdhD; dihydrolipoamide dehydrogenase [EC:1.8.1.4]	Dihydrolipoyl dehydrogenase OS=Photobacterium damselae OX=38293 GN=lpdA PE=3 SV=1	lpdA	3	-0.61856	2	PIK(1)LPFIPHEDPR	1	0.000130685	73.927	1	0.000391848	65.043	1	0.000130685
map00310 Lysine degradation	0.054975	2.51	KFZ67_01985	279	K	K00382	DLD, lpd, pdhD; dihydrolipoamide dehydrogenase [EC:1.8.1.4]	Dihydrolipoyl dehydrogenase OS=Photobacterium damselae OX=38293 GN=lpdA PE=3 SV=1	lpdA	2	-0.014866	6	VPNGK(1)LLDAEK	1	7.26591e-06	94.402	1	7.26591e-06	94.402	1	6.00796e-05
map00310 Lysine degradation	0.054975	2.51	KFZ67_09505	28	K	K00626	E2.3.1.9, atoB; acetyl-CoA C-acetyltransferase [EC:2.3.1.9]	Acetyl-CoA C-acetyltransferase OS=Photobacterium damselae OX=38293 GN=CTM90_05090 PE=3 SV=1	CTM90_05090	2	-0.19634	3	DQAAGK(1)IAAEVIK	1	0.00072526	60.861	1	0.000903038	58.885	1	0.00072526
map00310 Lysine degradation	0.054975	2.51	KFZ67_09505	345	K	K00626	E2.3.1.9, atoB; acetyl-CoA C-acetyltransferase [EC:2.3.1.9]	Acetyl-CoA C-acetyltransferase OS=Photobacterium damselae OX=38293 GN=CTM90_05090 PE=3 SV=1	CTM90_05090	4	1.9422	4	HQVEASDIIAK(1)ANLNGGAIALGHPLGASGNR	1	4.73063e-14	82.91	1	1.28533e-13	78.383	1	4.73063e-14
map00310 Lysine degradation	0.054975	2.51	KFZ67_09505	10	K	K00626	E2.3.1.9, atoB; acetyl-CoA C-acetyltransferase [EC:2.3.1.9]	Acetyl-CoA C-acetyltransferase OS=Photobacterium damselae OX=38293 GN=CTM90_05090 PE=3 SV=1	CTM90_05090	2	0.69125	6	VFIVAAK(1)R	1	7.27634e-17	143	1	3.68027e-11	128.57	1	7.27634e-17
map00310 Lysine degradation	0.054975	2.51	KFZ67_09955	287	K	K00658	DLST, sucB; 2-oxoglutarate dehydrogenase E2 component (dihydrolipoamide succinyltransferase) [EC:2.3.1.61]	Dihydrolipoyllysine-residue succinyltransferase component of 2-oxoglutarate dehydrogenase complex OS=Photobacterium damselae OX=38293 GN=BST98_09900 PE=3 SV=1	BST98_09900	2	-2.022	4	DCDK(1)LSLAEIEK	1	0.000551268	69.345	1	0.00118865	55.724	1	0.000551268
map00310 Lysine degradation	0.054975	2.51	KFZ67_09955	77	K	K00658	DLST, sucB; 2-oxoglutarate dehydrogenase E2 component (dihydrolipoamide succinyltransferase) [EC:2.3.1.61]	Dihydrolipoyllysine-residue succinyltransferase component of 2-oxoglutarate dehydrogenase complex OS=Photobacterium damselae OX=38293 GN=BST98_09900 PE=3 SV=1	BST98_09900	3	-3.0246	2	LK(1)VNAVAGEPTVDVPAGAEASPNKR	1	5.87317e-17	95.153	1	5.87317e-17	95.153	0.999997	2.21644e-05
map00310 Lysine degradation	0.054975	2.51	KFZ67_09955	99	K	K00658	DLST, sucB; 2-oxoglutarate dehydrogenase E2 component (dihydrolipoamide succinyltransferase) [EC:2.3.1.61]	Dihydrolipoyllysine-residue succinyltransferase component of 2-oxoglutarate dehydrogenase complex OS=Photobacterium damselae OX=38293 GN=BST98_09900 PE=3 SV=1	BST98_09900	3	-0.93464	4	VNAVAGEPTVDVPAGAEASPNK(1)R	1	4.15013e-11	81.977	1	1.31989e-10	74.192	1	4.15013e-11
map00310 Lysine degradation	0.054975	2.51	KFZ67_10375	366	K	K01782	fadJ; 3-hydroxyacyl-CoA dehydrogenase / enoyl-CoA hydratase / 3-hydroxybutyryl-CoA epimerase [EC:1.1.1.35 4.2.1.17 5.1.2.3]	Fatty acid oxidation complex subunit alpha OS=Photobacterium damselae OX=38293 GN=BST98_10320 PE=3 SV=1	BST98_10320	2	-0.46309	3	IISK(1)AQLQK	1	0.000320728	92.838	1	0.00155125	78.113	1	0.000320728
map00310 Lysine degradation	0.054975	2.51	KFZ67_10375	232	K	K01782	fadJ; 3-hydroxyacyl-CoA dehydrogenase / enoyl-CoA hydratase / 3-hydroxybutyryl-CoA epimerase [EC:1.1.1.35 4.2.1.17 5.1.2.3]	Fatty acid oxidation complex subunit alpha OS=Photobacterium damselae OX=38293 GN=BST98_10320 PE=3 SV=1	BST98_10320	2	0.50631	3	SVVFDQAK(1)K	1	0.00393358	61.78	1	0.00484429	59.908	1	0.00393358
map00333 Prodigiosin biosynthesis	0.58926	1.25	KFZ67_05140	286	K	K00645	fabD, MCAT, MCT1; [acyl-carrier-protein] S-malonyltransferase [EC:2.3.1.39]	Malonyl CoA-acyl carrier protein transacylase OS=Photobacterium damselae OX=38293 GN=BST98_05170 PE=3 SV=1	BST98_05170	2	0.57701	3	VLTGLTK(1)R	1	0.0295218	56.434	1	0.0338837	51.113	1	0.0295218
map00350 Tyrosine metabolism	0.421311	1.43	KFZ67_08760	59	K	K00832	tyrB; aromatic-amino-acid transaminase [EC:2.6.1.57]	Aminotransferase OS=Photobacterium damselae OX=38293 GN=BST98_08775 PE=3 SV=1	BST98_08775	2	1.2269	2	AEAILLDK(1)ETTK	1	0.000715088	66.989	1	0.00279747	51.726	1	0.000715088
map00350 Tyrosine metabolism	0.421311	1.43	KFZ67_08760	96	K	K00832	tyrB; aromatic-amino-acid transaminase [EC:2.6.1.57]	Aminotransferase OS=Photobacterium damselae OX=38293 GN=BST98_08775 PE=3 SV=1	BST98_08775	2	-1.2359	3	TK(1)TAQAPGGTGALR	1	2.19547e-17	128.09	1	2.20051e-13	119.87	1	2.19547e-17
map00350 Tyrosine metabolism	0.421311	1.43	KFZ67_08760	28	K	K00832	tyrB; aromatic-amino-acid transaminase [EC:2.6.1.57]	Aminotransferase OS=Photobacterium damselae OX=38293 GN=BST98_08775 PE=3 SV=1	BST98_08775	2	0.74073	3	VEK(1)INLGVGIYK	1	3.18593e-06	94.767	1	0.000249685	74.611	1	3.18593e-06
map00350 Tyrosine metabolism	0.421311	1.43	KFZ67_11160	120	K	K00121	frmA, ADH5, adhC; S-(hydroxymethyl)glutathione dehydrogenase / alcohol dehydrogenase [EC:1.1.1.284 1.1.1.1]	S-(hydroxymethyl)glutathione dehydrogenase OS=Photobacterium damselae OX=38293 GN=frmA PE=3 SV=1	frmA	2	-1.8535	10	ETQGK(1)GLMPDGTTR	1	0.000119643	71.781	1	0.000334127	61.409	1	0.000119643
map00350 Tyrosine metabolism	0.421311	1.43	KFZ67_11160	323	K	K00121	frmA, ADH5, adhC; S-(hydroxymethyl)glutathione dehydrogenase / alcohol dehydrogenase [EC:1.1.1.284 1.1.1.1]	S-(hydroxymethyl)glutathione dehydrogenase OS=Photobacterium damselae OX=38293 GN=frmA PE=3 SV=1	frmA	2	-0.41474	4	GSAFGGVK(1)GR	1	1.39655e-07	113.67	1	0.000179385	90.15	1	1.39655e-07
map00350 Tyrosine metabolism	0.421311	1.43	KFZ67_11160	107	K	K00121	frmA, ADH5, adhC; S-(hydroxymethyl)glutathione dehydrogenase / alcohol dehydrogenase [EC:1.1.1.284 1.1.1.1]	S-(hydroxymethyl)glutathione dehydrogenase OS=Photobacterium damselae OX=38293 GN=frmA PE=3 SV=1	frmA	2	0.21654	5	SGK(1)TNLCQAVR	1	3.90278e-27	151.66	1	3.90278e-27	151.66	1	2.3838e-19
map00350 Tyrosine metabolism	0.421311	1.43	KFZ67_11160	9	K	K00121	frmA, ADH5, adhC; S-(hydroxymethyl)glutathione dehydrogenase / alcohol dehydrogenase [EC:1.1.1.284 1.1.1.1]	S-(hydroxymethyl)glutathione dehydrogenase OS=Photobacterium damselae OX=38293 GN=frmA PE=3 SV=1	frmA	3	-0.30791	5	SK(1)AAVAWGPNQPLSIEEVDVMLPR	1	1.08452e-51	135.76	1	1.57407e-33	121.38	1	1.08452e-51
map00360 Phenylalanine metabolism	0.26093	2.01	KFZ67_07015	385	K	K03782	katG; catalase-peroxidase [EC:1.11.1.21]	Catalase-peroxidase OS=Photobacterium damselae OX=38293 GN=katG PE=3 SV=1	katG	2	-0.048443	4	FDPAYEK(1)ISR	1	1.09275e-07	115.57	1	1.18768e-05	106.62	1	1.09275e-07
map00360 Phenylalanine metabolism	0.26093	2.01	KFZ67_07015	587	K	K03782	katG; catalase-peroxidase [EC:1.11.1.21]	Catalase-peroxidase OS=Photobacterium damselae OX=38293 GN=katG PE=3 SV=1	katG	2	-0.98567	3	K(1)FSVSQEELLLDR	1	1.58557e-65	190.85	1	4.57251e-17	127.79	1	1.58557e-65
map00360 Phenylalanine metabolism	0.26093	2.01	KFZ67_07015	142	K	K03782	katG; catalase-peroxidase [EC:1.11.1.21]	Catalase-peroxidase OS=Photobacterium damselae OX=38293 GN=katG PE=3 SV=1	katG	2	0.38702	3	LIWPIK(1)QK	1	0.00430093	77.058	1	0.00430093	77.058	1	0.00430093
map00360 Phenylalanine metabolism	0.26093	2.01	KFZ67_07015	452	K	K03782	katG; catalase-peroxidase [EC:1.11.1.21]	Catalase-peroxidase OS=Photobacterium damselae OX=38293 GN=katG PE=3 SV=1	katG	2	1.0753	3	LK(1)QEIAASGLSVR	1	1.3795e-12	115.24	1	1.66491e-09	100.69	1	1.3795e-12
map00360 Phenylalanine metabolism	0.26093	2.01	KFZ67_08760	59	K	K00832	tyrB; aromatic-amino-acid transaminase [EC:2.6.1.57]	Aminotransferase OS=Photobacterium damselae OX=38293 GN=BST98_08775 PE=3 SV=1	BST98_08775	2	1.2269	2	AEAILLDK(1)ETTK	1	0.000715088	66.989	1	0.00279747	51.726	1	0.000715088
map00360 Phenylalanine metabolism	0.26093	2.01	KFZ67_08760	96	K	K00832	tyrB; aromatic-amino-acid transaminase [EC:2.6.1.57]	Aminotransferase OS=Photobacterium damselae OX=38293 GN=BST98_08775 PE=3 SV=1	BST98_08775	2	-1.2359	3	TK(1)TAQAPGGTGALR	1	2.19547e-17	128.09	1	2.20051e-13	119.87	1	2.19547e-17
map00360 Phenylalanine metabolism	0.26093	2.01	KFZ67_08760	28	K	K00832	tyrB; aromatic-amino-acid transaminase [EC:2.6.1.57]	Aminotransferase OS=Photobacterium damselae OX=38293 GN=BST98_08775 PE=3 SV=1	BST98_08775	2	0.74073	3	VEK(1)INLGVGIYK	1	3.18593e-06	94.767	1	0.000249685	74.611	1	3.18593e-06
map00362 Benzoate degradation	0.494813	1.25	KFZ67_09505	28	K	K00626	E2.3.1.9, atoB; acetyl-CoA C-acetyltransferase [EC:2.3.1.9]	Acetyl-CoA C-acetyltransferase OS=Photobacterium damselae OX=38293 GN=CTM90_05090 PE=3 SV=1	CTM90_05090	2	-0.19634	3	DQAAGK(1)IAAEVIK	1	0.00072526	60.861	1	0.000903038	58.885	1	0.00072526
map00362 Benzoate degradation	0.494813	1.25	KFZ67_09505	345	K	K00626	E2.3.1.9, atoB; acetyl-CoA C-acetyltransferase [EC:2.3.1.9]	Acetyl-CoA C-acetyltransferase OS=Photobacterium damselae OX=38293 GN=CTM90_05090 PE=3 SV=1	CTM90_05090	4	1.9422	4	HQVEASDIIAK(1)ANLNGGAIALGHPLGASGNR	1	4.73063e-14	82.91	1	1.28533e-13	78.383	1	4.73063e-14
map00362 Benzoate degradation	0.494813	1.25	KFZ67_09505	10	K	K00626	E2.3.1.9, atoB; acetyl-CoA C-acetyltransferase [EC:2.3.1.9]	Acetyl-CoA C-acetyltransferase OS=Photobacterium damselae OX=38293 GN=CTM90_05090 PE=3 SV=1	CTM90_05090	2	0.69125	6	VFIVAAK(1)R	1	7.27634e-17	143	1	3.68027e-11	128.57	1	7.27634e-17
map00362 Benzoate degradation	0.494813	1.25	KFZ67_10375	366	K	K01782	fadJ; 3-hydroxyacyl-CoA dehydrogenase / enoyl-CoA hydratase / 3-hydroxybutyryl-CoA epimerase [EC:1.1.1.35 4.2.1.17 5.1.2.3]	Fatty acid oxidation complex subunit alpha OS=Photobacterium damselae OX=38293 GN=BST98_10320 PE=3 SV=1	BST98_10320	2	-0.46309	3	IISK(1)AQLQK	1	0.000320728	92.838	1	0.00155125	78.113	1	0.000320728
map00362 Benzoate degradation	0.494813	1.25	KFZ67_10375	232	K	K01782	fadJ; 3-hydroxyacyl-CoA dehydrogenase / enoyl-CoA hydratase / 3-hydroxybutyryl-CoA epimerase [EC:1.1.1.35 4.2.1.17 5.1.2.3]	Fatty acid oxidation complex subunit alpha OS=Photobacterium damselae OX=38293 GN=BST98_10320 PE=3 SV=1	BST98_10320	2	0.50631	3	SVVFDQAK(1)K	1	0.00393358	61.78	1	0.00484429	59.908	1	0.00393358
map00380 Tryptophan metabolism	0.00999205	3.14	KFZ67_01985	256	K	K00382	DLD, lpd, pdhD; dihydrolipoamide dehydrogenase [EC:1.8.1.4]	Dihydrolipoyl dehydrogenase OS=Photobacterium damselae OX=38293 GN=lpdA PE=3 SV=1	lpdA	2	0.49886	3	EDGIYVSMEGK(1)K	1	0.000201095	75.739	1	0.000201095	75.739	1	0.00026044
map00380 Tryptophan metabolism	0.00999205	3.14	KFZ67_01985	300	K	K00382	DLD, lpd, pdhD; dihydrolipoamide dehydrogenase [EC:1.8.1.4]	Dihydrolipoyl dehydrogenase OS=Photobacterium damselae OX=38293 GN=lpdA PE=3 SV=1	lpdA	2	-0.61459	7	GFIHVDK(1)QMR	1	1.1894e-07	114.97	1	0.000187872	89.679	1	1.1894e-07
map00380 Tryptophan metabolism	0.00999205	3.14	KFZ67_01985	285	K	K00382	DLD, lpd, pdhD; dihydrolipoamide dehydrogenase [EC:1.8.1.4]	Dihydrolipoyl dehydrogenase OS=Photobacterium damselae OX=38293 GN=lpdA PE=3 SV=1	lpdA	2	0.00077076	3	LLDAEK(1)AGIEVDER	1	1.16173e-06	87.519	1	1.16173e-06	87.519	1	1.50465e-05
map00380 Tryptophan metabolism	0.00999205	3.14	KFZ67_01985	152	K	K00382	DLD, lpd, pdhD; dihydrolipoamide dehydrogenase [EC:1.8.1.4]	Dihydrolipoyl dehydrogenase OS=Photobacterium damselae OX=38293 GN=lpdA PE=3 SV=1	lpdA	3	-0.61856	2	PIK(1)LPFIPHEDPR	1	0.000130685	73.927	1	0.000391848	65.043	1	0.000130685
map00380 Tryptophan metabolism	0.00999205	3.14	KFZ67_01985	279	K	K00382	DLD, lpd, pdhD; dihydrolipoamide dehydrogenase [EC:1.8.1.4]	Dihydrolipoyl dehydrogenase OS=Photobacterium damselae OX=38293 GN=lpdA PE=3 SV=1	lpdA	2	-0.014866	6	VPNGK(1)LLDAEK	1	7.26591e-06	94.402	1	7.26591e-06	94.402	1	6.00796e-05
map00380 Tryptophan metabolism	0.00999205	3.14	KFZ67_07015	385	K	K03782	katG; catalase-peroxidase [EC:1.11.1.21]	Catalase-peroxidase OS=Photobacterium damselae OX=38293 GN=katG PE=3 SV=1	katG	2	-0.048443	4	FDPAYEK(1)ISR	1	1.09275e-07	115.57	1	1.18768e-05	106.62	1	1.09275e-07
map00380 Tryptophan metabolism	0.00999205	3.14	KFZ67_07015	587	K	K03782	katG; catalase-peroxidase [EC:1.11.1.21]	Catalase-peroxidase OS=Photobacterium damselae OX=38293 GN=katG PE=3 SV=1	katG	2	-0.98567	3	K(1)FSVSQEELLLDR	1	1.58557e-65	190.85	1	4.57251e-17	127.79	1	1.58557e-65
map00380 Tryptophan metabolism	0.00999205	3.14	KFZ67_07015	142	K	K03782	katG; catalase-peroxidase [EC:1.11.1.21]	Catalase-peroxidase OS=Photobacterium damselae OX=38293 GN=katG PE=3 SV=1	katG	2	0.38702	3	LIWPIK(1)QK	1	0.00430093	77.058	1	0.00430093	77.058	1	0.00430093
map00380 Tryptophan metabolism	0.00999205	3.14	KFZ67_07015	452	K	K03782	katG; catalase-peroxidase [EC:1.11.1.21]	Catalase-peroxidase OS=Photobacterium damselae OX=38293 GN=katG PE=3 SV=1	katG	2	1.0753	3	LK(1)QEIAASGLSVR	1	1.3795e-12	115.24	1	1.66491e-09	100.69	1	1.3795e-12
map00380 Tryptophan metabolism	0.00999205	3.14	KFZ67_09505	28	K	K00626	E2.3.1.9, atoB; acetyl-CoA C-acetyltransferase [EC:2.3.1.9]	Acetyl-CoA C-acetyltransferase OS=Photobacterium damselae OX=38293 GN=CTM90_05090 PE=3 SV=1	CTM90_05090	2	-0.19634	3	DQAAGK(1)IAAEVIK	1	0.00072526	60.861	1	0.000903038	58.885	1	0.00072526
map00380 Tryptophan metabolism	0.00999205	3.14	KFZ67_09505	345	K	K00626	E2.3.1.9, atoB; acetyl-CoA C-acetyltransferase [EC:2.3.1.9]	Acetyl-CoA C-acetyltransferase OS=Photobacterium damselae OX=38293 GN=CTM90_05090 PE=3 SV=1	CTM90_05090	4	1.9422	4	HQVEASDIIAK(1)ANLNGGAIALGHPLGASGNR	1	4.73063e-14	82.91	1	1.28533e-13	78.383	1	4.73063e-14
map00380 Tryptophan metabolism	0.00999205	3.14	KFZ67_09505	10	K	K00626	E2.3.1.9, atoB; acetyl-CoA C-acetyltransferase [EC:2.3.1.9]	Acetyl-CoA C-acetyltransferase OS=Photobacterium damselae OX=38293 GN=CTM90_05090 PE=3 SV=1	CTM90_05090	2	0.69125	6	VFIVAAK(1)R	1	7.27634e-17	143	1	3.68027e-11	128.57	1	7.27634e-17
map00380 Tryptophan metabolism	0.00999205	3.14	KFZ67_09955	287	K	K00658	DLST, sucB; 2-oxoglutarate dehydrogenase E2 component (dihydrolipoamide succinyltransferase) [EC:2.3.1.61]	Dihydrolipoyllysine-residue succinyltransferase component of 2-oxoglutarate dehydrogenase complex OS=Photobacterium damselae OX=38293 GN=BST98_09900 PE=3 SV=1	BST98_09900	2	-2.022	4	DCDK(1)LSLAEIEK	1	0.000551268	69.345	1	0.00118865	55.724	1	0.000551268
map00380 Tryptophan metabolism	0.00999205	3.14	KFZ67_09955	77	K	K00658	DLST, sucB; 2-oxoglutarate dehydrogenase E2 component (dihydrolipoamide succinyltransferase) [EC:2.3.1.61]	Dihydrolipoyllysine-residue succinyltransferase component of 2-oxoglutarate dehydrogenase complex OS=Photobacterium damselae OX=38293 GN=BST98_09900 PE=3 SV=1	BST98_09900	3	-3.0246	2	LK(1)VNAVAGEPTVDVPAGAEASPNKR	1	5.87317e-17	95.153	1	5.87317e-17	95.153	0.999997	2.21644e-05
map00380 Tryptophan metabolism	0.00999205	3.14	KFZ67_09955	99	K	K00658	DLST, sucB; 2-oxoglutarate dehydrogenase E2 component (dihydrolipoamide succinyltransferase) [EC:2.3.1.61]	Dihydrolipoyllysine-residue succinyltransferase component of 2-oxoglutarate dehydrogenase complex OS=Photobacterium damselae OX=38293 GN=BST98_09900 PE=3 SV=1	BST98_09900	3	-0.93464	4	VNAVAGEPTVDVPAGAEASPNK(1)R	1	4.15013e-11	81.977	1	1.31989e-10	74.192	1	4.15013e-11
map00380 Tryptophan metabolism	0.00999205	3.14	KFZ67_10375	366	K	K01782	fadJ; 3-hydroxyacyl-CoA dehydrogenase / enoyl-CoA hydratase / 3-hydroxybutyryl-CoA epimerase [EC:1.1.1.35 4.2.1.17 5.1.2.3]	Fatty acid oxidation complex subunit alpha OS=Photobacterium damselae OX=38293 GN=BST98_10320 PE=3 SV=1	BST98_10320	2	-0.46309	3	IISK(1)AQLQK	1	0.000320728	92.838	1	0.00155125	78.113	1	0.000320728
map00380 Tryptophan metabolism	0.00999205	3.14	KFZ67_10375	232	K	K01782	fadJ; 3-hydroxyacyl-CoA dehydrogenase / enoyl-CoA hydratase / 3-hydroxybutyryl-CoA epimerase [EC:1.1.1.35 4.2.1.17 5.1.2.3]	Fatty acid oxidation complex subunit alpha OS=Photobacterium damselae OX=38293 GN=BST98_10320 PE=3 SV=1	BST98_10320	2	0.50631	3	SVVFDQAK(1)K	1	0.00393358	61.78	1	0.00484429	59.908	1	0.00393358
map00401 Novobiocin biosynthesis	0.58926	1.25	KFZ67_08760	59	K	K00832	tyrB; aromatic-amino-acid transaminase [EC:2.6.1.57]	Aminotransferase OS=Photobacterium damselae OX=38293 GN=BST98_08775 PE=3 SV=1	BST98_08775	2	1.2269	2	AEAILLDK(1)ETTK	1	0.000715088	66.989	1	0.00279747	51.726	1	0.000715088
map00401 Novobiocin biosynthesis	0.58926	1.25	KFZ67_08760	96	K	K00832	tyrB; aromatic-amino-acid transaminase [EC:2.6.1.57]	Aminotransferase OS=Photobacterium damselae OX=38293 GN=BST98_08775 PE=3 SV=1	BST98_08775	2	-1.2359	3	TK(1)TAQAPGGTGALR	1	2.19547e-17	128.09	1	2.20051e-13	119.87	1	2.19547e-17
map00401 Novobiocin biosynthesis	0.58926	1.25	KFZ67_08760	28	K	K00832	tyrB; aromatic-amino-acid transaminase [EC:2.6.1.57]	Aminotransferase OS=Photobacterium damselae OX=38293 GN=BST98_08775 PE=3 SV=1	BST98_08775	2	0.74073	3	VEK(1)INLGVGIYK	1	3.18593e-06	94.767	1	0.000249685	74.611	1	3.18593e-06
map00410 beta-Alanine metabolism	0.342685	1.67	KFZ67_02865	28	K	K01580	E4.1.1.15, gadB, gadA, GAD; glutamate decarboxylase [EC:4.1.1.15]	Glutamate decarboxylase OS=Photobacterium damselae subsp. damselae OX=85581 GN=gadA PE=3 SV=1	gadA	3	1.521	5	EQGADPIFGSDALSHIASSK(1)K	1	7.9544e-16	91.276	1	9.90997e-16	89.663	1	7.9544e-16
map00410 beta-Alanine metabolism	0.342685	1.67	KFZ67_02865	29	K	K01580	E4.1.1.15, gadB, gadA, GAD; glutamate decarboxylase [EC:4.1.1.15]	Glutamate decarboxylase OS=Photobacterium damselae subsp. damselae OX=85581 GN=gadA PE=3 SV=1	gadA	3	-2.6209	3	K(1)MPQQEQSPQAIYQMIR	1	2.70225e-06	68.481	1	9.05945e-05	52.172	1	2.70225e-06
map00410 beta-Alanine metabolism	0.342685	1.67	KFZ67_02865	423	K	K01580	E4.1.1.15, gadB, gadA, GAD; glutamate decarboxylase [EC:4.1.1.15]	Glutamate decarboxylase OS=Photobacterium damselae subsp. damselae OX=85581 GN=gadA PE=3 SV=1	gadA	3	-1.5077	4	ILVK(1)QGFSQDLANLLIK	1	1.39452e-06	71.354	1	9.56032e-06	60.489	1	1.39452e-06
map00410 beta-Alanine metabolism	0.342685	1.67	KFZ67_10375	366	K	K01782	fadJ; 3-hydroxyacyl-CoA dehydrogenase / enoyl-CoA hydratase / 3-hydroxybutyryl-CoA epimerase [EC:1.1.1.35 4.2.1.17 5.1.2.3]	Fatty acid oxidation complex subunit alpha OS=Photobacterium damselae OX=38293 GN=BST98_10320 PE=3 SV=1	BST98_10320	2	-0.46309	3	IISK(1)AQLQK	1	0.000320728	92.838	1	0.00155125	78.113	1	0.000320728
map00410 beta-Alanine metabolism	0.342685	1.67	KFZ67_10375	232	K	K01782	fadJ; 3-hydroxyacyl-CoA dehydrogenase / enoyl-CoA hydratase / 3-hydroxybutyryl-CoA epimerase [EC:1.1.1.35 4.2.1.17 5.1.2.3]	Fatty acid oxidation complex subunit alpha OS=Photobacterium damselae OX=38293 GN=BST98_10320 PE=3 SV=1	BST98_10320	2	0.50631	3	SVVFDQAK(1)K	1	0.00393358	61.78	1	0.00484429	59.908	1	0.00393358
map00430 Taurine and hypotaurine metabolism	0.0164757	3.35	KFZ67_02865	28	K	K01580	E4.1.1.15, gadB, gadA, GAD; glutamate decarboxylase [EC:4.1.1.15]	Glutamate decarboxylase OS=Photobacterium damselae subsp. damselae OX=85581 GN=gadA PE=3 SV=1	gadA	3	1.521	5	EQGADPIFGSDALSHIASSK(1)K	1	7.9544e-16	91.276	1	9.90997e-16	89.663	1	7.9544e-16
map00430 Taurine and hypotaurine metabolism	0.0164757	3.35	KFZ67_02865	29	K	K01580	E4.1.1.15, gadB, gadA, GAD; glutamate decarboxylase [EC:4.1.1.15]	Glutamate decarboxylase OS=Photobacterium damselae subsp. damselae OX=85581 GN=gadA PE=3 SV=1	gadA	3	-2.6209	3	K(1)MPQQEQSPQAIYQMIR	1	2.70225e-06	68.481	1	9.05945e-05	52.172	1	2.70225e-06
map00430 Taurine and hypotaurine metabolism	0.0164757	3.35	KFZ67_02865	423	K	K01580	E4.1.1.15, gadB, gadA, GAD; glutamate decarboxylase [EC:4.1.1.15]	Glutamate decarboxylase OS=Photobacterium damselae subsp. damselae OX=85581 GN=gadA PE=3 SV=1	gadA	3	-1.5077	4	ILVK(1)QGFSQDLANLLIK	1	1.39452e-06	71.354	1	9.56032e-06	60.489	1	1.39452e-06
map00430 Taurine and hypotaurine metabolism	0.0164757	3.35	KFZ67_03890	473	K	K13788	pta; phosphate acetyltransferase [EC:2.3.1.8]	Phosphate acetyltransferase OS=Photobacterium damselae OX=38293 GN=pta PE=3 SV=1	pta	2	-1.4276	2	GAK(1)GMTEVVAR	1	0.000200726	75.416	1	0.000200726	75.416	1	0.00315164
map00430 Taurine and hypotaurine metabolism	0.0164757	3.35	KFZ67_03890	413	K	K13788	pta; phosphate acetyltransferase [EC:2.3.1.8]	Phosphate acetyltransferase OS=Photobacterium damselae OX=38293 GN=pta PE=3 SV=1	pta	2	-0.46396	3	TVK(1)AAAICAER	1	0.000208333	78.884	1	0.000564993	71.268	1	0.000208333
map00430 Taurine and hypotaurine metabolism	0.0164757	3.35	KFZ67_03890	33	K	K13788	pta; phosphate acetyltransferase [EC:2.3.1.8]	Phosphate acetyltransferase OS=Photobacterium damselae OX=38293 GN=pta PE=3 SV=1	pta	2	-1.5228	2	VSFFK(1)PIAQPR	1	0.000240294	77.744	1	0.00355096	54.486	1	0.000240294
map00430 Taurine and hypotaurine metabolism	0.0164757	3.35	KFZ67_03895	292	K	K00925	ackA; acetate kinase [EC:2.7.2.1]	Acetate kinase OS=Photobacterium damselae OX=38293 GN=ackA_1 PE=3 SV=1	ackA_1	2	-1.0422	6	FVEDNYGDK(1)EEATR	1	1.45219e-23	139.86	1	0.000558701	57.288	1	1.45219e-23
map00430 Taurine and hypotaurine metabolism	0.0164757	3.35	KFZ67_08360	330	K	K00259	ald; alanine dehydrogenase [EC:1.4.1.1]	Alanine dehydrogenase OS=Photobacterium damselae OX=38293 GN=ald PE=3 SV=1	ald	2	0.18792	3	LANMGYK(1)K	1	0.00441826	75.213	1	0.00441826	75.213	1	0.00441826
map00430 Taurine and hypotaurine metabolism	0.0164757	3.35	KFZ67_08360	256	K	K00259	ald; alanine dehydrogenase [EC:1.4.1.1]	Alanine dehydrogenase OS=Photobacterium damselae OX=38293 GN=ald PE=3 SV=1	ald	2	0.39955	8	LVTADMIK(1)K	1	0.000754194	83.998	1	0.00202251	72.607	1	0.000754194
map00430 Taurine and hypotaurine metabolism	0.0164757	3.35	KFZ67_08360	7	K	K00259	ald; alanine dehydrogenase [EC:1.4.1.1]	Alanine dehydrogenase OS=Photobacterium damselae OX=38293 GN=ald PE=3 SV=1	ald	2	-0.65031	6	MIIGVPK(1)EIK	1	0.00126658	63.624	1	0.00363601	57.149	1	0.00126658
map00430 Taurine and hypotaurine metabolism	0.0164757	3.35	KFZ67_08360	151	K	K00259	ald; alanine dehydrogenase [EC:1.4.1.1]	Alanine dehydrogenase OS=Photobacterium damselae OX=38293 GN=ald PE=3 SV=1	ald	3	-0.94496	6	MSIQAGALALEK(1)SHGGK	1	8.61424e-13	103.13	1	8.61424e-13	103.13	1	1.54058e-09
map00450 Selenocompound metabolism	0.439111	1.25	KFZ67_05040	362	K	K01874	MARS, metG; methionyl-tRNA synthetase [EC:6.1.1.10]	Methionine--tRNA ligase OS=Photobacterium damselae OX=38293 GN=metG PE=3 SV=1	metG	2	-0.078876	3	YYYAAK(1)LNSR	1	7.10743e-05	96.171	1	0.00204283	62.633	1	7.10743e-05
map00450 Selenocompound metabolism	0.439111	1.25	KFZ67_13115	362	K	K00956	cysN; sulfate adenylyltransferase subunit 1 [EC:2.7.7.4]	Sulfate adenylyltransferase subunit 1 OS=Photobacterium damselae OX=38293 GN=cysN PE=3 SV=1	cysN	3	1.2031	5	IAGNK(1)TQGQVIGFEHQIDINK	1	5.92562e-11	82.635	1	6.81326e-07	64.522	1	5.92562e-11
map00450 Selenocompound metabolism	0.439111	1.25	KFZ67_13115	459	K	K00956	cysN; sulfate adenylyltransferase subunit 1 [EC:2.7.7.4]	Sulfate adenylyltransferase subunit 1 OS=Photobacterium damselae OX=38293 GN=cysN PE=3 SV=1	cysN	3	-0.477	3	K(1)HFPHWNSSDISK	1	0.000240764	70.563	1	0.000278187	70.438	1	0.000240764
map00450 Selenocompound metabolism	0.439111	1.25	KFZ67_13115	24	K	K00956	cysN; sulfate adenylyltransferase subunit 1 [EC:2.7.7.4]	Sulfate adenylyltransferase subunit 1 OS=Photobacterium damselae OX=38293 GN=cysN PE=3 SV=1	cysN	4	-0.41155	3	MNHAIQQQVAELGIEAYLDQHQNK(1)SLLR	1	7.1067e-36	119.87	1	3.02955e-35	111.55	1	7.1067e-36
map00450 Selenocompound metabolism	0.439111	1.25	KFZ67_13115	278	K	K00956	cysN; sulfate adenylyltransferase subunit 1 [EC:2.7.7.4]	Sulfate adenylyltransferase subunit 1 OS=Photobacterium damselae OX=38293 GN=cysN PE=3 SV=1	cysN	2	-0.79996	2	VK(1)VLPSEK	1	5.78584e-05	105.1	1	0.000131841	98.582	1	5.78584e-05
map00450 Selenocompound metabolism	0.439111	1.25	KFZ67_13115	284	K	K00956	cysN; sulfate adenylyltransferase subunit 1 [EC:2.7.7.4]	Sulfate adenylyltransferase subunit 1 OS=Photobacterium damselae OX=38293 GN=cysN PE=3 SV=1	cysN	2	0.8084	4	VLPSEK(1)ESYIER	1	9.67751e-14	125.54	1	9.67751e-14	125.54	1	1.02819e-05
map00450 Selenocompound metabolism	0.439111	1.25	KFZ67_13115	105	K	K00956	cysN; sulfate adenylyltransferase subunit 1 [EC:2.7.7.4]	Sulfate adenylyltransferase subunit 1 OS=Photobacterium damselae OX=38293 GN=cysN PE=3 SV=1	cysN	2	0.17473	2	YFSTQK(1)R	1	0.000192935	107.43	1	0.000192935	107.43	1	0.000263532
map00450 Selenocompound metabolism	0.439111	1.25	KFZ67_13120	115	K	K00957	cysD; sulfate adenylyltransferase subunit 2 [EC:2.7.7.4]	Sulfate adenylyltransferase subunit 2 OS=Photobacterium damselae OX=38293 GN=cysD PE=3 SV=1	cysD	2	2.5314	5	HTDIMK(1)TQALK	1	2.56317e-27	154.28	1	2.56317e-27	154.28	1	2.47953e-13
map00450 Selenocompound metabolism	0.439111	1.25	KFZ67_13120	120	K	K00957	cysD; sulfate adenylyltransferase subunit 2 [EC:2.7.7.4]	Sulfate adenylyltransferase subunit 2 OS=Photobacterium damselae OX=38293 GN=cysD PE=3 SV=1	cysD	3	1.5478	3	TQALK(1)QALNQYGFDAAFGGAR	1	5.69251e-27	111.93	1	5.69251e-27	111.93	1	4.02357e-21
map00450 Selenocompound metabolism	0.439111	1.25	KFZ67_13120	82	K	K00957	cysD; sulfate adenylyltransferase subunit 2 [EC:2.7.7.4]	Sulfate adenylyltransferase subunit 2 OS=Photobacterium damselae OX=38293 GN=cysD PE=3 SV=1	cysD	3	0.25407	5	K(1)YGFELLVHK	1	0.000633938	73.499	1	0.000633938	73.499	1	0.000633938
map00450 Selenocompound metabolism	0.439111	1.25	KFZ67_13120	238	K	K00957	cysD; sulfate adenylyltransferase subunit 2 [EC:2.7.7.4]	Sulfate adenylyltransferase subunit 2 OS=Photobacterium damselae OX=38293 GN=cysD PE=3 SV=1	cysD	2	-1.8278	7	MPLTDSDK(1)VEQK	1	8.62978e-06	88.021	1	0.000374447	71.888	1	8.62978e-06
map00450 Selenocompound metabolism	0.439111	1.25	KFZ67_13120	177	K	K00957	cysD; sulfate adenylyltransferase subunit 2 [EC:2.7.7.4]	Sulfate adenylyltransferase subunit 2 OS=Photobacterium damselae OX=38293 GN=cysD PE=3 SV=1	cysD	2	-0.80529	5	TYNGQINK(1)GESIR	1	7.87231e-17	124.07	1	1.19737e-12	116.19	1	7.87231e-17
map00460 Cyanoamino acid metabolism	0.58926	1.25	KFZ67_11120	345	K	K00600	glyA, SHMT; glycine hydroxymethyltransferase [EC:2.1.2.1]	Serine hydroxymethyltransferase OS=Photobacterium damsela subsp. piscicida OX=38294 GN=glyA PE=3 SV=1	glyA	3	-0.038057	4	EADAALGAANITVNK(1)NSVPNDPR	1	6.56601e-45	143.4	1	6.56601e-45	143.4	1	2.16302e-35
map00460 Cyanoamino acid metabolism	0.58926	1.25	KFZ67_11120	330	K	K00600	glyA, SHMT; glycine hydroxymethyltransferase [EC:2.1.2.1]	Serine hydroxymethyltransferase OS=Photobacterium damsela subsp. piscicida OX=38294 GN=glyA PE=3 SV=1	glyA	3	-0.81801	3	GITGK(1)EADAALGAANITVNK	1	1.61841e-10	82.482	1	1.61841e-10	82.482	1	6.2005e-10
map00460 Cyanoamino acid metabolism	0.58926	1.25	KFZ67_11120	325	K	K00600	glyA, SHMT; glycine hydroxymethyltransferase [EC:2.1.2.1]	Serine hydroxymethyltransferase OS=Photobacterium damsela subsp. piscicida OX=38294 GN=glyA PE=3 SV=1	glyA	3	-0.2402	3	IVSGSTENHLFLVDLIDK(1)GITGK	1	1.83922e-11	83.826	1	2.09806e-07	69.071	1	1.83922e-11
map00460 Cyanoamino acid metabolism	0.58926	1.25	KFZ67_11120	410	K	K00600	glyA, SHMT; glycine hydroxymethyltransferase [EC:2.1.2.1]	Serine hydroxymethyltransferase OS=Photobacterium damsela subsp. piscicida OX=38294 GN=glyA PE=3 SV=1	glyA	2	0.7709	4	VLEICK(1)R	1	1.18019e-06	119.57	1	1.18019e-06	119.57	1	0.000192935
map00460 Cyanoamino acid metabolism	0.58926	1.25	KFZ67_11120	62	K	K00600	glyA, SHMT; glycine hydroxymethyltransferase [EC:2.1.2.1]	Serine hydroxymethyltransferase OS=Photobacterium damsela subsp. piscicida OX=38294 GN=glyA PE=3 SV=1	glyA	2	-0.91322	5	YAEGYPGK(1)R	1	7.58099e-08	120.15	1	1.51613e-07	117.89	1	7.58099e-08
map00471 D-Glutamine and D-glutamate metabolism	0.179337	2.51	KFZ67_01890	11	K	K01924	murC; UDP-N-acetylmuramate--alanine ligase [EC:6.3.2.8]	UDP-N-acetylmuramate--L-alanine ligase OS=Photobacterium damselae OX=38293 GN=murC PE=3 SV=1	murC	2	1.8253	3	LDNQQLAK(1)IR	1	2.93082e-05	101.38	1	2.93082e-05	101.38	1	0.000337891
map00471 D-Glutamine and D-glutamate metabolism	0.179337	2.51	KFZ67_02870	298	K	K01425	glsA, GLS; glutaminase [EC:3.5.1.2]	Glutaminase OS=Photobacterium damselae OX=38293 GN=glsA PE=3 SV=1	glsA	2	0.47754	8	GQLMIK(1)QVAK	1	0.00108223	68.657	1	0.00275616	59.908	1	0.00108223
map00471 D-Glutamine and D-glutamate metabolism	0.179337	2.51	KFZ67_02870	286	K	K01425	glsA, GLS; glutaminase [EC:3.5.1.2]	Glutaminase OS=Photobacterium damselae OX=38293 GN=glsA PE=3 SV=1	glsA	2	2.6837	2	LDK(1)YGNSVR	1	0.00166817	77.14	1	0.00166817	77.14	1	0.0038011
map00480 Glutathione metabolism	0.126936	1.79	KFZ67_02295	263	K	K01920	gshB; glutathione synthase [EC:6.3.2.3]	Glutathione synthetase OS=Photobacterium damselae OX=38293 GN=gshB_1 PE=3 SV=1	gshB_1	2	-0.93409	3	IAEAVAPTLK(1)EK	1	0.000193426	77.185	1	0.00182875	57.106	1	0.000193426
map00480 Glutathione metabolism	0.126936	1.79	KFZ67_04945	236	K	K00031	IDH1, IDH2, icd; isocitrate dehydrogenase [EC:1.1.1.42]	Isocitrate dehydrogenase [NADP] OS=Photobacterium damselae OX=38293 GN=icd PE=4 SV=1	icd	2	-0.79941	7	GNIMK(1)FTEGAFK	1	7.7128e-05	82.505	1	0.000119746	80.555	1	7.7128e-05
map00480 Glutathione metabolism	0.126936	1.79	KFZ67_04945	4	K	K00031	IDH1, IDH2, icd; isocitrate dehydrogenase [EC:1.1.1.42]	Isocitrate dehydrogenase [NADP] OS=Photobacterium damselae OX=38293 GN=icd PE=4 SV=1	icd	2	-1.5528	15	MDSK(1)VVVPVDGQK	1	5.06566e-07	94.688	1	2.3644e-06	88.163	1	5.06566e-07
map00480 Glutathione metabolism	0.126936	1.79	KFZ67_04945	274	K	K00031	IDH1, IDH2, icd; isocitrate dehydrogenase [EC:1.1.1.42]	Isocitrate dehydrogenase [NADP] OS=Photobacterium damselae OX=38293 GN=icd PE=4 SV=1	icd	2	0.61097	3	NPNTGK(1)EIVVK	1	5.63111e-07	106.26	1	5.63111e-07	106.26	1	3.40291e-06
map00480 Glutathione metabolism	0.126936	1.79	KFZ67_04945	56	K	K00031	IDH1, IDH2, icd; isocitrate dehydrogenase [EC:1.1.1.42]	Isocitrate dehydrogenase [NADP] OS=Photobacterium damselae OX=38293 GN=icd PE=4 SV=1	icd	2	0.5647	13	VVDAAVQK(1)AYGGDR	1	2.15272e-17	128.22	1	1.91715e-10	107.74	1	2.15272e-17
map00480 Glutathione metabolism	0.126936	1.79	KFZ67_04945	351	K	K00031	IDH1, IDH2, icd; isocitrate dehydrogenase [EC:1.1.1.42]	Isocitrate dehydrogenase [NADP] OS=Photobacterium damselae OX=38293 GN=icd PE=4 SV=1	icd	3	0.2696	3	YAGQDK(1)VNPGSLILSAEMMLR	1	9.1815e-28	120.73	1	9.1815e-28	120.73	1	1.16609e-17
map00480 Glutathione metabolism	0.126936	1.79	KFZ67_07285	13	K	K01256	pepN; aminopeptidase N [EC:3.4.11.2]	Aminopeptidase N OS=Photobacterium damselae OX=38293 GN=CTM90_19115 PE=4 SV=1	CTM90_19115	2	-1.1962	4	SDITNTNQPTAK(1)YR	1	1.38208e-41	168.61	1	5.44918e-32	156.81	1	1.38208e-41
map00480 Glutathione metabolism	0.126936	1.79	KFZ67_07285	48	K	K01256	pepN; aminopeptidase N [EC:3.4.11.2]	Aminopeptidase N OS=Photobacterium damselae OX=38293 GN=CTM90_19115 PE=4 SV=1	CTM90_19115	2	-0.34949	3	VLAVSQVK(1)R	1	1.25441e-33	168.27	1	5.09811e-25	157.91	1	1.25441e-33
map00480 Glutathione metabolism	0.126936	1.79	KFZ67_10945	58	K	K01270	pepD; dipeptidase D [EC:3.4.13.-]	Aminoacyl-histidine dipeptidase OS=Photobacterium damselae OX=38293 GN=BST98_10870 PE=4 SV=1	BST98_10870	2	0.11689	3	DNVGNVIIK(1)K	1	0.000416909	81.017	1	0.000416909	81.017	1	0.00216953
map00480 Glutathione metabolism	0.126936	1.79	KFZ67_10945	209	K	K01270	pepD; dipeptidase D [EC:3.4.13.-]	Aminoacyl-histidine dipeptidase OS=Photobacterium damselae OX=38293 GN=BST98_10870 PE=4 SV=1	BST98_10870	2	-0.0076487	3	LVIK(1)GLK	1	0.0173946	73.665	1	0.0336817	60.799	1	0.0173946
map00480 Glutathione metabolism	0.126936	1.79	KFZ67_12485	185	K	K01255	CARP, pepA; leucyl aminopeptidase [EC:3.4.11.1]	Probable cytosol aminopeptidase OS=Photobacterium damsela subsp. piscicida OX=38294 GN=pepA PE=3 SV=1	pepA	3	1.5628	3	AINHGLSISSGVK(1)AAK	1	3.63417e-05	59.673	1	0.000164885	51.466	1	3.63417e-05
map00480 Glutathione metabolism	0.126936	1.79	KFZ67_12485	6	K	K01255	CARP, pepA; leucyl aminopeptidase [EC:3.4.11.1]	Probable cytosol aminopeptidase OS=Photobacterium damsela subsp. piscicida OX=38294 GN=pepA PE=3 SV=1	pepA	2	2.6959	4	MEFSVK(1)SGSPEK	1	0.00117137	69.352	1	0.00117137	69.352	1	0.00173688
map00521 Streptomycin biosynthesis	0.358856	2.51	KFZ67_10005	273	K	K01835	pgm; phosphoglucomutase [EC:5.4.2.2]	Phosphoglucomutase, alpha-D-glucose phosphate-specific OS=Photobacterium damselae OX=38293 GN=BST98_09950 PE=3 SV=1	BST98_09950	2	1.1601	6	FMSLDK(1)DGVIR	1	0.00024225	77.674	1	0.00597825	50.354	1	0.00024225
map00521 Streptomycin biosynthesis	0.358856	2.51	KFZ67_10005	525	K	K01835	pgm; phosphoglucomutase [EC:5.4.2.2]	Phosphoglucomutase, alpha-D-glucose phosphate-specific OS=Photobacterium damselae OX=38293 GN=BST98_09950 PE=3 SV=1	BST98_09950	3	0.084306	3	GK(1)EHLALIEK	1	0.000584808	73.435	1	0.000764397	71.176	1	0.000584808
map00562 Inositol phosphate metabolism	0.486779	1.67	KFZ67_00840	11	K	K01803	TPI, tpiA; triosephosphate isomerase (TIM) [EC:5.3.1.1]	Triosephosphate isomerase OS=Photobacterium damselae OX=38293 GN=tpiA PE=3 SV=1	tpiA	2	1.236	7	HPVVMGNWK(1)LNGSK	1	4.98702e-13	116.63	1	8.79917e-05	73.415	1	4.98702e-13
map00620 Pyruvate metabolism	2.95871e-06	2.71	KFZ67_00945	156	K	K01595	ppc; phosphoenolpyruvate carboxylase [EC:4.1.1.31]	Phosphoenolpyruvate carboxylase OS=Photobacterium damselae OX=38293 GN=ppc PE=3 SV=1	ppc	2	2.0717	3	LVQINK(1)CLSK	1	0.000452132	81.335	1	0.000466514	81.017	1	0.000452132
map00620 Pyruvate metabolism	2.95871e-06	2.71	KFZ67_01975	466	K	K00163	aceE; pyruvate dehydrogenase E1 component [EC:1.2.4.1]	Pyruvate dehydrogenase E1 component OS=Photobacterium damselae subsp. damselae OX=85581 GN=aceE PE=4 SV=1	aceE	3	-0.23359	3	DALHGYTPK(1)R	1	9.94784e-05	93.096	1	0.00140899	64.82	1	9.94784e-05
map00620 Pyruvate metabolism	2.95871e-06	2.71	KFZ67_01975	360	K	K00163	aceE; pyruvate dehydrogenase E1 component [EC:1.2.4.1]	Pyruvate dehydrogenase E1 component OS=Photobacterium damselae subsp. damselae OX=85581 GN=aceE PE=4 SV=1	aceE	3	-1.3058	4	YPETAALVADMTDDEIFALK(1)R	1	3.65445e-07	68.952	1	9.00136e-07	62.648	1	3.65445e-07
map00620 Pyruvate metabolism	2.95871e-06	2.71	KFZ67_01975	389	K	K00163	aceE; pyruvate dehydrogenase E1 component [EC:1.2.4.1]	Pyruvate dehydrogenase E1 component OS=Photobacterium damselae subsp. damselae OX=85581 GN=aceE PE=4 SV=1	aceE	2	0.039841	4	ETQGKPTVILAK(1)TIK	0.999998	0.000260164	65.231	0.999975	0.00226635	54.764	0.999998	0.000260164
map00620 Pyruvate metabolism	2.95871e-06	2.71	KFZ67_01975	392	K	K00163	aceE; pyruvate dehydrogenase E1 component [EC:1.2.4.1]	Pyruvate dehydrogenase E1 component OS=Photobacterium damselae subsp. damselae OX=85581 GN=aceE PE=4 SV=1	aceE	2	0.54867	9	TIK(1)GYGMGDAAEGK	1	1.16173e-06	87.519	1	5.03359e-05	78.69	1	1.16173e-06
map00620 Pyruvate metabolism	2.95871e-06	2.71	KFZ67_01975	509	K	K00163	aceE; pyruvate dehydrogenase E1 component [EC:1.2.4.1]	Pyruvate dehydrogenase E1 component OS=Photobacterium damselae subsp. damselae OX=85581 GN=aceE PE=4 SV=1	aceE	2	0.1758	4	ILNILLK(1)DK	1	0.000680928	85.355	1	0.00194444	74.841	1	0.000680928
map00620 Pyruvate metabolism	2.95871e-06	2.71	KFZ67_01975	411	K	K00163	aceE; pyruvate dehydrogenase E1 component [EC:1.2.4.1]	Pyruvate dehydrogenase E1 component OS=Photobacterium damselae subsp. damselae OX=85581 GN=aceE PE=4 SV=1	aceE	4	-2.3066	7	K(1)MDMTHVQHLR	1	4.7509e-06	108.7	1	0.00011672	79.659	1	4.7509e-06
map00620 Pyruvate metabolism	2.95871e-06	2.71	KFZ67_01975	377	K	K00163	aceE; pyruvate dehydrogenase E1 component [EC:1.2.4.1]	Pyruvate dehydrogenase E1 component OS=Photobacterium damselae subsp. damselae OX=85581 GN=aceE PE=4 SV=1	aceE	2	-4.3321	3	LFAAFNNAK(1)ETQGK	1	6.94686e-05	81.904	1	6.94686e-05	76.01	1	7.7979e-05
map00620 Pyruvate metabolism	2.95871e-06	2.71	KFZ67_01975	872	K	K00163	aceE; pyruvate dehydrogenase E1 component [EC:1.2.4.1]	Pyruvate dehydrogenase E1 component OS=Photobacterium damselae subsp. damselae OX=85581 GN=aceE PE=4 SV=1	aceE	2	1.5299	6	SVVADAIK(1)K	1	0.00364803	63.397	1	0.00393358	61.78	1	0.00364803
map00620 Pyruvate metabolism	2.95871e-06	2.71	KFZ67_01980	339	K	K00627	DLAT, aceF, pdhC; pyruvate dehydrogenase E2 component (dihydrolipoamide acetyltransferase) [EC:2.3.1.12]	Acetyltransferase component of pyruvate dehydrogenase complex OS=Photobacterium damselae subsp. damselae OX=85581 GN=aceF PE=3 SV=1	aceF	2	1.0038	3	EFGVNLAK(1)VK	1	0.000550774	79.148	1	0.000550774	79.148	1	0.00134743
map00620 Pyruvate metabolism	2.95871e-06	2.71	KFZ67_01980	351	K	K00627	DLAT, aceF, pdhC; pyruvate dehydrogenase E2 component (dihydrolipoamide acetyltransferase) [EC:2.3.1.12]	Acetyltransferase component of pyruvate dehydrogenase complex OS=Photobacterium damselae subsp. damselae OX=85581 GN=aceF PE=3 SV=1	aceF	2	0.33202	3	ILK(1)EDVQNFVK	1	2.46783e-09	116.55	1	2.46783e-09	116.55	1	2.87648e-09
map00620 Pyruvate metabolism	2.95871e-06	2.71	KFZ67_01985	256	K	K00382	DLD, lpd, pdhD; dihydrolipoamide dehydrogenase [EC:1.8.1.4]	Dihydrolipoyl dehydrogenase OS=Photobacterium damselae OX=38293 GN=lpdA PE=3 SV=1	lpdA	2	0.49886	3	EDGIYVSMEGK(1)K	1	0.000201095	75.739	1	0.000201095	75.739	1	0.00026044
map00620 Pyruvate metabolism	2.95871e-06	2.71	KFZ67_01985	300	K	K00382	DLD, lpd, pdhD; dihydrolipoamide dehydrogenase [EC:1.8.1.4]	Dihydrolipoyl dehydrogenase OS=Photobacterium damselae OX=38293 GN=lpdA PE=3 SV=1	lpdA	2	-0.61459	7	GFIHVDK(1)QMR	1	1.1894e-07	114.97	1	0.000187872	89.679	1	1.1894e-07
map00620 Pyruvate metabolism	2.95871e-06	2.71	KFZ67_01985	285	K	K00382	DLD, lpd, pdhD; dihydrolipoamide dehydrogenase [EC:1.8.1.4]	Dihydrolipoyl dehydrogenase OS=Photobacterium damselae OX=38293 GN=lpdA PE=3 SV=1	lpdA	2	0.00077076	3	LLDAEK(1)AGIEVDER	1	1.16173e-06	87.519	1	1.16173e-06	87.519	1	1.50465e-05
map00620 Pyruvate metabolism	2.95871e-06	2.71	KFZ67_01985	152	K	K00382	DLD, lpd, pdhD; dihydrolipoamide dehydrogenase [EC:1.8.1.4]	Dihydrolipoyl dehydrogenase OS=Photobacterium damselae OX=38293 GN=lpdA PE=3 SV=1	lpdA	3	-0.61856	2	PIK(1)LPFIPHEDPR	1	0.000130685	73.927	1	0.000391848	65.043	1	0.000130685
map00620 Pyruvate metabolism	2.95871e-06	2.71	KFZ67_01985	279	K	K00382	DLD, lpd, pdhD; dihydrolipoamide dehydrogenase [EC:1.8.1.4]	Dihydrolipoyl dehydrogenase OS=Photobacterium damselae OX=38293 GN=lpdA PE=3 SV=1	lpdA	2	-0.014866	6	VPNGK(1)LLDAEK	1	7.26591e-06	94.402	1	7.26591e-06	94.402	1	6.00796e-05
map00620 Pyruvate metabolism	2.95871e-06	2.71	KFZ67_03145	136	K	K01962	accA; acetyl-CoA carboxylase carboxyl transferase subunit alpha [EC:6.4.1.2 2.1.3.15]	Acetyl-coenzyme A carboxylase carboxyl transferase subunit alpha OS=Photobacterium damselae subsp. damselae OX=85581 GN=accA PE=3 SV=1	accA	2	-0.23154	2	NFGMPK(1)PEGYR	1	0.000148501	81.017	1	0.000148501	81.017	1	0.000991815
map00620 Pyruvate metabolism	2.95871e-06	2.71	KFZ67_03890	473	K	K13788	pta; phosphate acetyltransferase [EC:2.3.1.8]	Phosphate acetyltransferase OS=Photobacterium damselae OX=38293 GN=pta PE=3 SV=1	pta	2	-1.4276	2	GAK(1)GMTEVVAR	1	0.000200726	75.416	1	0.000200726	75.416	1	0.00315164
map00620 Pyruvate metabolism	2.95871e-06	2.71	KFZ67_03890	413	K	K13788	pta; phosphate acetyltransferase [EC:2.3.1.8]	Phosphate acetyltransferase OS=Photobacterium damselae OX=38293 GN=pta PE=3 SV=1	pta	2	-0.46396	3	TVK(1)AAAICAER	1	0.000208333	78.884	1	0.000564993	71.268	1	0.000208333
map00620 Pyruvate metabolism	2.95871e-06	2.71	KFZ67_03890	33	K	K13788	pta; phosphate acetyltransferase [EC:2.3.1.8]	Phosphate acetyltransferase OS=Photobacterium damselae OX=38293 GN=pta PE=3 SV=1	pta	2	-1.5228	2	VSFFK(1)PIAQPR	1	0.000240294	77.744	1	0.00355096	54.486	1	0.000240294
map00620 Pyruvate metabolism	2.95871e-06	2.71	KFZ67_03895	292	K	K00925	ackA; acetate kinase [EC:2.7.2.1]	Acetate kinase OS=Photobacterium damselae OX=38293 GN=ackA_1 PE=3 SV=1	ackA_1	2	-1.0422	6	FVEDNYGDK(1)EEATR	1	1.45219e-23	139.86	1	0.000558701	57.288	1	1.45219e-23
map00620 Pyruvate metabolism	2.95871e-06	2.71	KFZ67_03960	232	K	K00656	E2.3.1.54, pflD; formate C-acetyltransferase [EC:2.3.1.54]	Formate C-acetyltransferase OS=Photobacterium damselae OX=38293 GN=pflB PE=4 SV=1	pflB	2	-0.84425	3	ALGQIK(1)AMAAK	1	9.4841e-06	89.913	1	9.80932e-05	80.986	1	9.4841e-06
map00620 Pyruvate metabolism	2.95871e-06	2.71	KFZ67_03960	612	K	K00656	E2.3.1.54, pflD; formate C-acetyltransferase [EC:2.3.1.54]	Formate C-acetyltransferase OS=Photobacterium damselae OX=38293 GN=pflB PE=4 SV=1	pflB	3	0.038674	3	DAIPTQSILTITSNVVYGK(1)K	1	1.02046e-07	72.21	1	7.97813e-07	65.022	1	1.02046e-07
map00620 Pyruvate metabolism	2.95871e-06	2.71	KFZ67_03960	640	K	K00656	E2.3.1.54, pflD; formate C-acetyltransferase [EC:2.3.1.54]	Formate C-acetyltransferase OS=Photobacterium damselae OX=38293 GN=pflB PE=4 SV=1	pflB	2	2.0227	11	DEK(1)GAVASLTSVGK	1	5.80887e-13	115.68	1	1.27677e-06	86.497	1	5.80887e-13
map00620 Pyruvate metabolism	2.95871e-06	2.71	KFZ67_03960	718	K	K00656	E2.3.1.54, pflD; formate C-acetyltransferase [EC:2.3.1.54]	Formate C-acetyltransferase OS=Photobacterium damselae OX=38293 GN=pflB PE=4 SV=1	pflB	2	0.10825	3	ETLEDAVK(1)HPEK	1	0.000241457	74.987	1	0.00105583	62.088	1	0.000241457
map00620 Pyruvate metabolism	2.95871e-06	2.71	KFZ67_03960	722	K	K00656	E2.3.1.54, pflD; formate C-acetyltransferase [EC:2.3.1.54]	Formate C-acetyltransferase OS=Photobacterium damselae OX=38293 GN=pflB PE=4 SV=1	pflB	2	-0.44313	5	HPEK(1)YPQLTIR	1	7.84229e-10	120.55	1	7.39802e-07	105.03	1	7.84229e-10
map00620 Pyruvate metabolism	2.95871e-06	2.71	KFZ67_03960	159	K	K00656	E2.3.1.54, pflD; formate C-acetyltransferase [EC:2.3.1.54]	Formate C-acetyltransferase OS=Photobacterium damselae OX=38293 GN=pflB PE=4 SV=1	pflB	2	0.14041	13	K(1)SGVLTGLPDAYGR	1	3.29549e-80	206.49	1	3.29549e-80	206.49	1	9.0792e-42
map00620 Pyruvate metabolism	2.95871e-06	2.71	KFZ67_03960	121	K	K00656	E2.3.1.54, pflD; formate C-acetyltransferase [EC:2.3.1.54]	Formate C-acetyltransferase OS=Photobacterium damselae OX=38293 GN=pflB PE=4 SV=1	pflB	2	0.60346	5	MIEGSCK(1)VYGR	1	1.35601e-11	120.06	1	1.35601e-11	110.39	1	6.50711e-10
map00620 Pyruvate metabolism	2.95871e-06	2.71	KFZ67_04275	10	K	K01963	accD; acetyl-CoA carboxylase carboxyl transferase subunit beta [EC:6.4.1.2 2.1.3.15]	Acetyl-coenzyme A carboxylase carboxyl transferase subunit beta OS=Photobacterium damselae subsp. damselae OX=85581 GN=accD PE=3 SV=1	accD	2	0.1021	3	ILTK(1)SNIVTSR	1	1.12446e-09	119.74	1	9.70305e-07	103.43	1	1.12446e-09
map00620 Pyruvate metabolism	2.95871e-06	2.71	KFZ67_05230	9	K	K03778	ldhA; D-lactate dehydrogenase [EC:1.1.1.28]	D-lactate dehydrogenase OS=Photobacterium damselae subsp. damselae OX=85581 GN=ldhA PE=3 SV=1	ldhA	2	0.54705	6	VAVFSTK(1)NYDQK	1	7.59699e-06	89.301	1	0.000184412	77.597	1	7.59699e-06
map00620 Pyruvate metabolism	2.95871e-06	2.71	KFZ67_05990	219	K	K00873	PK, pyk; pyruvate kinase [EC:2.7.1.40]	Pyruvate kinase OS=Photobacterium damselae OX=38293 GN=BST98_06040 PE=3 SV=1	BST98_06040	2	0.4741	3	LAEEAGLQAK(1)LVAK	1	0.0002391	66.004	1	0.00111565	48.532	1	0.0002391
map00620 Pyruvate metabolism	2.95871e-06	2.71	KFZ67_09505	28	K	K00626	E2.3.1.9, atoB; acetyl-CoA C-acetyltransferase [EC:2.3.1.9]	Acetyl-CoA C-acetyltransferase OS=Photobacterium damselae OX=38293 GN=CTM90_05090 PE=3 SV=1	CTM90_05090	2	-0.19634	3	DQAAGK(1)IAAEVIK	1	0.00072526	60.861	1	0.000903038	58.885	1	0.00072526
map00620 Pyruvate metabolism	2.95871e-06	2.71	KFZ67_09505	345	K	K00626	E2.3.1.9, atoB; acetyl-CoA C-acetyltransferase [EC:2.3.1.9]	Acetyl-CoA C-acetyltransferase OS=Photobacterium damselae OX=38293 GN=CTM90_05090 PE=3 SV=1	CTM90_05090	4	1.9422	4	HQVEASDIIAK(1)ANLNGGAIALGHPLGASGNR	1	4.73063e-14	82.91	1	1.28533e-13	78.383	1	4.73063e-14
map00620 Pyruvate metabolism	2.95871e-06	2.71	KFZ67_09505	10	K	K00626	E2.3.1.9, atoB; acetyl-CoA C-acetyltransferase [EC:2.3.1.9]	Acetyl-CoA C-acetyltransferase OS=Photobacterium damselae OX=38293 GN=CTM90_05090 PE=3 SV=1	CTM90_05090	2	0.69125	6	VFIVAAK(1)R	1	7.27634e-17	143	1	3.68027e-11	128.57	1	7.27634e-17
map00620 Pyruvate metabolism	2.95871e-06	2.71	KFZ67_11345	156	K	K01638	aceB, glcB; malate synthase [EC:2.3.3.9]	Malate synthase OS=Photobacterium damselae OX=38293 GN=aceB PE=3 SV=1	aceB	3	0.70886	6	HYQLK(1)EDPAVLICR	1	1.58213e-23	136.24	1	2.2046e-17	125.53	1	1.58213e-23
map00620 Pyruvate metabolism	2.95871e-06	2.71	KFZ67_11345	352	K	K01638	aceB, glcB; malate synthase [EC:2.3.3.9]	Malate synthase OS=Photobacterium damselae OX=38293 GN=aceB PE=3 SV=1	aceB	4	-1.2304	2	IQTDK(1)SLEAHNGHDGTWVAHPGLADTAR	1	1.64713e-07	59.372	1	1.64713e-07	59.372	1	4.84233e-07
map00620 Pyruvate metabolism	2.95871e-06	2.71	KFZ67_11345	347	K	K01638	aceB, glcB; malate synthase [EC:2.3.3.9]	Malate synthase OS=Photobacterium damselae OX=38293 GN=aceB PE=3 SV=1	aceB	2	1.836	6	NAWVLNK(1)IQTDK	1	1.25726e-11	122.34	1	1.25726e-11	122.34	1	3.1641e-10
map00620 Pyruvate metabolism	2.95871e-06	2.71	KFZ67_12730	434	K	K00873	PK, pyk; pyruvate kinase [EC:2.7.1.40]	Pyruvate kinase OS=Photobacterium damsela subsp. piscicida OX=38294 GN=pykF PE=3 SV=1	pykF	2	0.11361	2	GK(1)ELALETGLGAK	1	0.000105945	78.814	1	0.000105945	78.814	1	0.000137832
map00620 Pyruvate metabolism	2.95871e-06	2.71	KFZ67_12730	360	K	K00873	PK, pyk; pyruvate kinase [EC:2.7.1.40]	Pyruvate kinase OS=Photobacterium damsela subsp. piscicida OX=38294 GN=pykF PE=3 SV=1	pykF	2	1.4009	5	ITEAVCK(1)GAVDTAEK	1	1.75211e-22	131.86	1	1.75211e-22	131.86	1	1.90816e-17
map00620 Pyruvate metabolism	2.95871e-06	2.71	KFZ67_12730	389	K	K00873	PK, pyk; pyruvate kinase [EC:2.7.1.40]	Pyruvate kinase OS=Photobacterium damsela subsp. piscicida OX=38294 GN=pykF PE=3 SV=1	pykF	2	-1.2335	3	K(1)YFPTAR	1	4.84642e-11	133.81	1	4.84642e-11	133.81	1	2.52483e-10
map00620 Pyruvate metabolism	2.95871e-06	2.71	KFZ67_12730	59	K	K00873	PK, pyk; pyruvate kinase [EC:2.7.1.40]	Pyruvate kinase OS=Photobacterium damsela subsp. piscicida OX=38294 GN=pykF PE=3 SV=1	pykF	2	0.23093	3	NTGK(1)QLAILLDTK	1	0.00035064	69.516	1	0.00160987	51.03	1	0.00035064
map00620 Pyruvate metabolism	2.95871e-06	2.71	KFZ67_12890	142	K	K00024	mdh; malate dehydrogenase [EC:1.1.1.37]	Malate dehydrogenase OS=Photobacterium damselae subsp. damselae OX=85581 GN=mdh PE=3 SV=1	mdh	2	-2.2154	3	K(1)LFGITTLDVIR	1	1.83179e-27	149.23	1	1.83179e-27	149.23	1	4.2682e-20
map00620 Pyruvate metabolism	2.95871e-06	2.71	KFZ67_12890	162	K	K00024	mdh; malate dehydrogenase [EC:1.1.1.37]	Malate dehydrogenase OS=Photobacterium damselae subsp. damselae OX=85581 GN=mdh PE=3 SV=1	mdh	2	0.97471	3	SETFVAELK(1)GK	1	0.000294285	75.819	1	0.00106502	66.267	1	0.000294285
map00620 Pyruvate metabolism	2.95871e-06	2.71	KFZ67_12890	21	K	K00024	mdh; malate dehydrogenase [EC:1.1.1.37]	Malate dehydrogenase OS=Photobacterium damselae subsp. damselae OX=85581 GN=mdh PE=3 SV=1	mdh	3	-0.24109	3	VAVIGAAGGIGQALALLLK(1)NR	1	2.19203e-53	148.41	1	2.23028e-27	118.31	1	2.19203e-53
map00620 Pyruvate metabolism	2.95871e-06	2.71	KFZ67_13470	258	K	K00244	frdA; fumarate reductase flavoprotein subunit [EC:1.3.5.4]	Fumarate reductase flavoprotein subunit OS=Photobacterium damselae OX=38293 GN=CTM90_17535 PE=3 SV=1	CTM90_17535	2	-1.6945	6	GEGGIIVNK(1)NGYR	1	2.09353e-12	111.52	1	0.00033581	72.29	1	2.09353e-12
map00620 Pyruvate metabolism	2.95871e-06	2.71	KFZ67_13470	591	K	K00244	frdA; fumarate reductase flavoprotein subunit [EC:1.3.5.4]	Fumarate reductase flavoprotein subunit OS=Photobacterium damselae OX=38293 GN=CTM90_17535 PE=3 SV=1	CTM90_17535	3	0.13956	2	LYGAAAEEAAAK(1)EAAEQQEK	1	3.54712e-10	78.78	1	3.41824e-07	69.422	1	3.54712e-10
map00620 Pyruvate metabolism	2.95871e-06	2.71	KFZ67_13575	367	K	K01895	ACSS1_2, acs; acetyl-CoA synthetase [EC:6.2.1.1]	Acetyl-coenzyme A synthetase OS=Photobacterium damselae OX=38293 GN=acs PE=3 SV=1	acs	2	0.10714	16	ALMAK(1)GDEAIVDTSR	1	6.73423e-22	123.76	1	6.73423e-22	123.76	1	1.50243e-18
map00620 Pyruvate metabolism	2.95871e-06	2.71	KFZ67_13575	640	K	K01895	ACSS1_2, acs; acetyl-CoA synthetase [EC:6.2.1.1]	Acetyl-coenzyme A synthetase OS=Photobacterium damselae OX=38293 GN=acs PE=3 SV=1	acs	3	0.2204	4	IATGDTSNLGDTSTLADPSVVEK(1)LIAEK	1	1.38514e-13	82.942	1	3.60515e-09	65.171	1	1.38514e-13
map00620 Pyruvate metabolism	2.95871e-06	2.71	KFZ67_13575	645	K	K01895	ACSS1_2, acs; acetyl-CoA synthetase [EC:6.2.1.1]	Acetyl-coenzyme A synthetase OS=Photobacterium damselae OX=38293 GN=acs PE=3 SV=1	acs	2	0.10552	3	LIAEK(1)QQLL	1	0.00442148	61.679	1	0.0138315	49.536	1	0.00442148
map00620 Pyruvate metabolism	2.95871e-06	2.71	KFZ67_13575	181	K	K01895	ACSS1_2, acs; acetyl-CoA synthetase [EC:6.2.1.1]	Acetyl-coenzyme A synthetase OS=Photobacterium damselae OX=38293 GN=acs PE=3 SV=1	acs	3	-0.031305	6	IIDSNAK(1)VVITADEGVR	1	1.38491e-08	85.421	1	1.38491e-08	85.421	1	7.93262e-08
map00620 Pyruvate metabolism	2.95871e-06	2.71	KFZ67_13575	585	K	K01895	ACSS1_2, acs; acetyl-CoA synthetase [EC:6.2.1.1]	Acetyl-coenzyme A synthetase OS=Photobacterium damselae OX=38293 GN=acs PE=3 SV=1	acs	3	-0.53717	2	K(1)EIGPIATPDFLHWTDALPK	1	8.15194e-07	64.843	1	8.15194e-07	64.843	1	8.46284e-07
map00620 Pyruvate metabolism	2.95871e-06	2.71	KFZ67_13575	617	K	K01895	ACSS1_2, acs; acetyl-CoA synthetase [EC:6.2.1.1]	Acetyl-coenzyme A synthetase OS=Photobacterium damselae OX=38293 GN=acs PE=3 SV=1	acs	3	2.0426	14	K(1)IATGDTSNLGDTSTLADPSVVEK	1	1.44189e-32	113.65	1	8.84848e-24	103.92	1	1.44189e-32
map00620 Pyruvate metabolism	2.95871e-06	2.71	KFZ67_13575	348	K	K01895	ACSS1_2, acs; acetyl-CoA synthetase [EC:6.2.1.1]	Acetyl-coenzyme A synthetase OS=Photobacterium damselae OX=38293 GN=acs PE=3 SV=1	acs	3	1.4901	3	MSQVVDK(1)HQVNILYTAPTAIR	1	2.27558e-10	74.364	1	8.5193e-08	72.167	1	2.27558e-10
map00620 Pyruvate metabolism	2.95871e-06	2.71	KFZ67_15635	179	K	K01679	E4.2.1.2B, fumC, FH; fumarate hydratase, class II [EC:4.2.1.2]	Fumarate hydratase class II OS=Photobacterium damselae OX=38293 GN=aspA PE=3 SV=1	aspA	3	-0.39316	2	AIGHIVK(1)TGR	1	0.00190143	60.167	1	0.00345384	55.806	1	0.00190143
map00620 Pyruvate metabolism	2.95871e-06	2.71	KFZ67_15885	342	K	K00156	poxB; pyruvate dehydrogenase (quinone) [EC:1.2.5.1]	Pyruvate oxidase OS=Photobacterium damselae OX=38293 GN=BST98_18400 PE=3 SV=1	BST98_18400	3	-0.15225	3	K(1)ELDNLAEVKPK	1	9.02509e-05	81.709	0.999996	0.00157555	58.098	1	9.02509e-05
map00620 Pyruvate metabolism	2.95871e-06	2.71	KFZ67_15885	225	K	K00156	poxB; pyruvate dehydrogenase (quinone) [EC:1.2.5.1]	Pyruvate oxidase OS=Photobacterium damselae OX=38293 GN=BST98_18400 PE=3 SV=1	BST98_18400	3	0.54338	3	LK(1)APIVHALR	1	0.000190122	85.533	1	0.00290527	57.347	1	0.000190122
map00620 Pyruvate metabolism	2.95871e-06	2.71	KFZ67_15885	17	K	K00156	poxB; pyruvate dehydrogenase (quinone) [EC:1.2.5.1]	Pyruvate oxidase OS=Photobacterium damselae OX=38293 GN=BST98_18400 PE=3 SV=1	BST98_18400	2	0.90836	3	LLSEAGVK(1)R	1	2.00483e-11	128.36	1	0.000255238	93.598	1	2.00483e-11
map00620 Pyruvate metabolism	2.95871e-06	2.71	KFZ67_15885	211	K	K00156	poxB; pyruvate dehydrogenase (quinone) [EC:1.2.5.1]	Pyruvate oxidase OS=Photobacterium damselae OX=38293 GN=BST98_18400 PE=3 SV=1	BST98_18400	3	0.079901	3	TVLFCGAGTK(1)NSHK	1	3.76502e-11	85.45	1	0.00274209	59.709	1	3.76502e-11
map00620 Pyruvate metabolism	2.95871e-06	2.71	KFZ67_19475	35	K	K00027	ME2, sfcA, maeA; malate dehydrogenase (oxaloacetate-decarboxylating) [EC:1.1.1.38]	NAD-dependent malic enzyme OS=Photobacterium damselae OX=38293 GN=BST98_15890 PE=3 SV=1	BST98_15890	2	1.7672	3	TLNK(1)STAFTYEER	1	0.000137357	76.759	1	0.000137357	76.759	1	0.0004135
map00625 Chloroalkane and chloroalkene degradation	0.358856	2.51	KFZ67_11160	120	K	K00121	frmA, ADH5, adhC; S-(hydroxymethyl)glutathione dehydrogenase / alcohol dehydrogenase [EC:1.1.1.284 1.1.1.1]	S-(hydroxymethyl)glutathione dehydrogenase OS=Photobacterium damselae OX=38293 GN=frmA PE=3 SV=1	frmA	2	-1.8535	10	ETQGK(1)GLMPDGTTR	1	0.000119643	71.781	1	0.000334127	61.409	1	0.000119643
map00625 Chloroalkane and chloroalkene degradation	0.358856	2.51	KFZ67_11160	323	K	K00121	frmA, ADH5, adhC; S-(hydroxymethyl)glutathione dehydrogenase / alcohol dehydrogenase [EC:1.1.1.284 1.1.1.1]	S-(hydroxymethyl)glutathione dehydrogenase OS=Photobacterium damselae OX=38293 GN=frmA PE=3 SV=1	frmA	2	-0.41474	4	GSAFGGVK(1)GR	1	1.39655e-07	113.67	1	0.000179385	90.15	1	1.39655e-07
map00625 Chloroalkane and chloroalkene degradation	0.358856	2.51	KFZ67_11160	107	K	K00121	frmA, ADH5, adhC; S-(hydroxymethyl)glutathione dehydrogenase / alcohol dehydrogenase [EC:1.1.1.284 1.1.1.1]	S-(hydroxymethyl)glutathione dehydrogenase OS=Photobacterium damselae OX=38293 GN=frmA PE=3 SV=1	frmA	2	0.21654	5	SGK(1)TNLCQAVR	1	3.90278e-27	151.66	1	3.90278e-27	151.66	1	2.3838e-19
map00625 Chloroalkane and chloroalkene degradation	0.358856	2.51	KFZ67_11160	9	K	K00121	frmA, ADH5, adhC; S-(hydroxymethyl)glutathione dehydrogenase / alcohol dehydrogenase [EC:1.1.1.284 1.1.1.1]	S-(hydroxymethyl)glutathione dehydrogenase OS=Photobacterium damselae OX=38293 GN=frmA PE=3 SV=1	frmA	3	-0.30791	5	SK(1)AAVAWGPNQPLSIEEVDVMLPR	1	1.08452e-51	135.76	1	1.57407e-33	121.38	1	1.08452e-51
map00626 Naphthalene degradation	0.358856	2.51	KFZ67_11160	120	K	K00121	frmA, ADH5, adhC; S-(hydroxymethyl)glutathione dehydrogenase / alcohol dehydrogenase [EC:1.1.1.284 1.1.1.1]	S-(hydroxymethyl)glutathione dehydrogenase OS=Photobacterium damselae OX=38293 GN=frmA PE=3 SV=1	frmA	2	-1.8535	10	ETQGK(1)GLMPDGTTR	1	0.000119643	71.781	1	0.000334127	61.409	1	0.000119643
map00626 Naphthalene degradation	0.358856	2.51	KFZ67_11160	323	K	K00121	frmA, ADH5, adhC; S-(hydroxymethyl)glutathione dehydrogenase / alcohol dehydrogenase [EC:1.1.1.284 1.1.1.1]	S-(hydroxymethyl)glutathione dehydrogenase OS=Photobacterium damselae OX=38293 GN=frmA PE=3 SV=1	frmA	2	-0.41474	4	GSAFGGVK(1)GR	1	1.39655e-07	113.67	1	0.000179385	90.15	1	1.39655e-07
map00626 Naphthalene degradation	0.358856	2.51	KFZ67_11160	107	K	K00121	frmA, ADH5, adhC; S-(hydroxymethyl)glutathione dehydrogenase / alcohol dehydrogenase [EC:1.1.1.284 1.1.1.1]	S-(hydroxymethyl)glutathione dehydrogenase OS=Photobacterium damselae OX=38293 GN=frmA PE=3 SV=1	frmA	2	0.21654	5	SGK(1)TNLCQAVR	1	3.90278e-27	151.66	1	3.90278e-27	151.66	1	2.3838e-19
map00626 Naphthalene degradation	0.358856	2.51	KFZ67_11160	9	K	K00121	frmA, ADH5, adhC; S-(hydroxymethyl)glutathione dehydrogenase / alcohol dehydrogenase [EC:1.1.1.284 1.1.1.1]	S-(hydroxymethyl)glutathione dehydrogenase OS=Photobacterium damselae OX=38293 GN=frmA PE=3 SV=1	frmA	3	-0.30791	5	SK(1)AAVAWGPNQPLSIEEVDVMLPR	1	1.08452e-51	135.76	1	1.57407e-33	121.38	1	1.08452e-51
map00630 Glyoxylate and dicarboxylate metabolism	0.000479983	2.42	KFZ67_01985	256	K	K00382	DLD, lpd, pdhD; dihydrolipoamide dehydrogenase [EC:1.8.1.4]	Dihydrolipoyl dehydrogenase OS=Photobacterium damselae OX=38293 GN=lpdA PE=3 SV=1	lpdA	2	0.49886	3	EDGIYVSMEGK(1)K	1	0.000201095	75.739	1	0.000201095	75.739	1	0.00026044
map00630 Glyoxylate and dicarboxylate metabolism	0.000479983	2.42	KFZ67_01985	300	K	K00382	DLD, lpd, pdhD; dihydrolipoamide dehydrogenase [EC:1.8.1.4]	Dihydrolipoyl dehydrogenase OS=Photobacterium damselae OX=38293 GN=lpdA PE=3 SV=1	lpdA	2	-0.61459	7	GFIHVDK(1)QMR	1	1.1894e-07	114.97	1	0.000187872	89.679	1	1.1894e-07
map00630 Glyoxylate and dicarboxylate metabolism	0.000479983	2.42	KFZ67_01985	285	K	K00382	DLD, lpd, pdhD; dihydrolipoamide dehydrogenase [EC:1.8.1.4]	Dihydrolipoyl dehydrogenase OS=Photobacterium damselae OX=38293 GN=lpdA PE=3 SV=1	lpdA	2	0.00077076	3	LLDAEK(1)AGIEVDER	1	1.16173e-06	87.519	1	1.16173e-06	87.519	1	1.50465e-05
map00630 Glyoxylate and dicarboxylate metabolism	0.000479983	2.42	KFZ67_01985	152	K	K00382	DLD, lpd, pdhD; dihydrolipoamide dehydrogenase [EC:1.8.1.4]	Dihydrolipoyl dehydrogenase OS=Photobacterium damselae OX=38293 GN=lpdA PE=3 SV=1	lpdA	3	-0.61856	2	PIK(1)LPFIPHEDPR	1	0.000130685	73.927	1	0.000391848	65.043	1	0.000130685
map00630 Glyoxylate and dicarboxylate metabolism	0.000479983	2.42	KFZ67_01985	279	K	K00382	DLD, lpd, pdhD; dihydrolipoamide dehydrogenase [EC:1.8.1.4]	Dihydrolipoyl dehydrogenase OS=Photobacterium damselae OX=38293 GN=lpdA PE=3 SV=1	lpdA	2	-0.014866	6	VPNGK(1)LLDAEK	1	7.26591e-06	94.402	1	7.26591e-06	94.402	1	6.00796e-05
map00630 Glyoxylate and dicarboxylate metabolism	0.000479983	2.42	KFZ67_02005	387	K	K01682	acnB; aconitate hydratase 2 / 2-methylisocitrate dehydratase [EC:4.2.1.3 4.2.1.99]	Aconitate hydratase B OS=Photobacterium damselae subsp. damselae OX=85581 GN=acnB PE=3 SV=1	acnB	2	2.1684	6	GYTLAQK(1)MVGK	1	0.000309863	72.2	1	0.000309863	72.2	1	0.000468429
map00630 Glyoxylate and dicarboxylate metabolism	0.000479983	2.42	KFZ67_02395	9	K	K02437	gcvH, GCSH; glycine cleavage system H protein	Glycine cleavage system H protein OS=Photobacterium damselae OX=38293 GN=gcvH PE=3 SV=1	gcvH	4	-0.53551	3	SYVPSDLK(1)FTHSHEWVR	1	1.30603e-12	99.747	1	1.30603e-12	99.747	1	3.53027e-10
map00630 Glyoxylate and dicarboxylate metabolism	0.000479983	2.42	KFZ67_07570	177	K	K00124	fdoH, fdsB; formate dehydrogenase iron-sulfur subunit	4Fe-4S dicluster domain-containing protein OS=Photobacterium damselae OX=38293 GN=fdhB1 PE=4 SV=1	fdhB1	2	0.70839	3	ISEIYSK(1)R	1	1.54022e-32	161.02	1	7.85249e-08	121.09	1	1.54022e-32
map00630 Glyoxylate and dicarboxylate metabolism	0.000479983	2.42	KFZ67_07575	131	K	K00123	fdoG, fdhF, fdwA; formate dehydrogenase major subunit [EC:1.17.1.9]	Formate dehydrogenase OS=Photobacterium damselae OX=38293 GN=fdnG PE=3 SV=1	fdnG	2	0.82363	3	LVNGK(1)WQR	1	4.11816e-11	128.57	1	0.00095075	89.55	1	4.11816e-11
map00630 Glyoxylate and dicarboxylate metabolism	0.000479983	2.42	KFZ67_07575	736	K	K00123	fdoG, fdhF, fdwA; formate dehydrogenase major subunit [EC:1.17.1.9]	Formate dehydrogenase OS=Photobacterium damselae OX=38293 GN=fdnG PE=3 SV=1	fdnG	2	-1.8663	4	NWK(1)TDLSGGIQR	1	1.16524e-13	123.67	1	3.48046e-06	94.402	1	1.16524e-13
map00630 Glyoxylate and dicarboxylate metabolism	0.000479983	2.42	KFZ67_07575	450	K	K00123	fdoG, fdhF, fdwA; formate dehydrogenase major subunit [EC:1.17.1.9]	Formate dehydrogenase OS=Photobacterium damselae OX=38293 GN=fdnG PE=3 SV=1	fdnG	2	-1.3933	8	PMNSK(1)GIPVSR	1	6.92879e-10	120.77	1	6.92879e-10	120.77	1	5.88167e-06
map00630 Glyoxylate and dicarboxylate metabolism	0.000479983	2.42	KFZ67_09505	28	K	K00626	E2.3.1.9, atoB; acetyl-CoA C-acetyltransferase [EC:2.3.1.9]	Acetyl-CoA C-acetyltransferase OS=Photobacterium damselae OX=38293 GN=CTM90_05090 PE=3 SV=1	CTM90_05090	2	-0.19634	3	DQAAGK(1)IAAEVIK	1	0.00072526	60.861	1	0.000903038	58.885	1	0.00072526
map00630 Glyoxylate and dicarboxylate metabolism	0.000479983	2.42	KFZ67_09505	345	K	K00626	E2.3.1.9, atoB; acetyl-CoA C-acetyltransferase [EC:2.3.1.9]	Acetyl-CoA C-acetyltransferase OS=Photobacterium damselae OX=38293 GN=CTM90_05090 PE=3 SV=1	CTM90_05090	4	1.9422	4	HQVEASDIIAK(1)ANLNGGAIALGHPLGASGNR	1	4.73063e-14	82.91	1	1.28533e-13	78.383	1	4.73063e-14
map00630 Glyoxylate and dicarboxylate metabolism	0.000479983	2.42	KFZ67_09505	10	K	K00626	E2.3.1.9, atoB; acetyl-CoA C-acetyltransferase [EC:2.3.1.9]	Acetyl-CoA C-acetyltransferase OS=Photobacterium damselae OX=38293 GN=CTM90_05090 PE=3 SV=1	CTM90_05090	2	0.69125	6	VFIVAAK(1)R	1	7.27634e-17	143	1	3.68027e-11	128.57	1	7.27634e-17
map00630 Glyoxylate and dicarboxylate metabolism	0.000479983	2.42	KFZ67_09985	103	K	K01647	CS, gltA; citrate synthase [EC:2.3.3.1]	Citrate synthase OS=Photobacterium damselae OX=38293 GN=gltA PE=3 SV=1	gltA	2	0.047713	3	AEYEK(1)FR	1	0.000224622	107.32	1	0.000224622	107.32	1	0.000448139
map00630 Glyoxylate and dicarboxylate metabolism	0.000479983	2.42	KFZ67_09985	293	K	K01647	CS, gltA; citrate synthase [EC:2.3.3.1]	Citrate synthase OS=Photobacterium damselae OX=38293 GN=gltA PE=3 SV=1	gltA	3	-0.63837	3	AK(1)DKDDPFR	1	5.99189e-17	139.39	0.999836	8.26491e-05	98.254	1	5.99189e-17
map00630 Glyoxylate and dicarboxylate metabolism	0.000479983	2.42	KFZ67_09985	222	K	K01647	CS, gltA; citrate synthase [EC:2.3.3.1]	Citrate synthase OS=Photobacterium damselae OX=38293 GN=gltA PE=3 SV=1	gltA	3	1.6511	4	ALDK(1)IFILHADHEQNASTSTVR	1	2.35004e-29	122.35	1	2.35004e-29	122.35	1	2.28984e-22
map00630 Glyoxylate and dicarboxylate metabolism	0.000479983	2.42	KFZ67_11120	345	K	K00600	glyA, SHMT; glycine hydroxymethyltransferase [EC:2.1.2.1]	Serine hydroxymethyltransferase OS=Photobacterium damsela subsp. piscicida OX=38294 GN=glyA PE=3 SV=1	glyA	3	-0.038057	4	EADAALGAANITVNK(1)NSVPNDPR	1	6.56601e-45	143.4	1	6.56601e-45	143.4	1	2.16302e-35
map00630 Glyoxylate and dicarboxylate metabolism	0.000479983	2.42	KFZ67_11120	330	K	K00600	glyA, SHMT; glycine hydroxymethyltransferase [EC:2.1.2.1]	Serine hydroxymethyltransferase OS=Photobacterium damsela subsp. piscicida OX=38294 GN=glyA PE=3 SV=1	glyA	3	-0.81801	3	GITGK(1)EADAALGAANITVNK	1	1.61841e-10	82.482	1	1.61841e-10	82.482	1	6.2005e-10
map00630 Glyoxylate and dicarboxylate metabolism	0.000479983	2.42	KFZ67_11120	325	K	K00600	glyA, SHMT; glycine hydroxymethyltransferase [EC:2.1.2.1]	Serine hydroxymethyltransferase OS=Photobacterium damsela subsp. piscicida OX=38294 GN=glyA PE=3 SV=1	glyA	3	-0.2402	3	IVSGSTENHLFLVDLIDK(1)GITGK	1	1.83922e-11	83.826	1	2.09806e-07	69.071	1	1.83922e-11
map00630 Glyoxylate and dicarboxylate metabolism	0.000479983	2.42	KFZ67_11120	410	K	K00600	glyA, SHMT; glycine hydroxymethyltransferase [EC:2.1.2.1]	Serine hydroxymethyltransferase OS=Photobacterium damsela subsp. piscicida OX=38294 GN=glyA PE=3 SV=1	glyA	2	0.7709	4	VLEICK(1)R	1	1.18019e-06	119.57	1	1.18019e-06	119.57	1	0.000192935
map00630 Glyoxylate and dicarboxylate metabolism	0.000479983	2.42	KFZ67_11120	62	K	K00600	glyA, SHMT; glycine hydroxymethyltransferase [EC:2.1.2.1]	Serine hydroxymethyltransferase OS=Photobacterium damsela subsp. piscicida OX=38294 GN=glyA PE=3 SV=1	glyA	2	-0.91322	5	YAEGYPGK(1)R	1	7.58099e-08	120.15	1	1.51613e-07	117.89	1	7.58099e-08
map00630 Glyoxylate and dicarboxylate metabolism	0.000479983	2.42	KFZ67_11340	392	K	K01637	E4.1.3.1, aceA; isocitrate lyase [EC:4.1.3.1]	Isocitrate lyase OS=Photobacterium damselae OX=38293 GN=aceA PE=4 SV=1	aceA	3	0.27967	13	REFESADK(1)GYTFVAHQQEVGTGYFDK	1	6.53721e-64	157.24	1	2.20174e-52	143.27	1	6.53721e-64
map00630 Glyoxylate and dicarboxylate metabolism	0.000479983	2.42	KFZ67_11340	326	K	K01637	E4.1.3.1, aceA; isocitrate lyase [EC:4.1.3.1]	Isocitrate lyase OS=Photobacterium damselae OX=38293 GN=aceA PE=4 SV=1	aceA	3	0.076561	8	FAEAIHAQYPDQILAYNCSPSFNWEK(1)NLDAK	1	3.88248e-36	118.11	1	5.27039e-36	116.57	1	3.88248e-36
map00630 Glyoxylate and dicarboxylate metabolism	0.000479983	2.42	KFZ67_11340	54	K	K01637	E4.1.3.1, aceA; isocitrate lyase [EC:4.1.3.1]	Isocitrate lyase OS=Photobacterium damselae OX=38293 GN=aceA PE=4 SV=1	aceA	2	-0.11787	12	GADK(1)LWDLINGSAK	1	2.13262e-10	107.46	1	9.2498e-07	89.624	1	2.13262e-10
map00630 Glyoxylate and dicarboxylate metabolism	0.000479983	2.42	KFZ67_11340	64	K	K01637	E4.1.3.1, aceA; isocitrate lyase [EC:4.1.3.1]	Isocitrate lyase OS=Photobacterium damselae OX=38293 GN=aceA PE=4 SV=1	aceA	2	0.46944	11	LWDLINGSAK(1)K	1	3.21812e-09	113.22	1	3.4529e-09	113.22	1	3.21812e-09
map00630 Glyoxylate and dicarboxylate metabolism	0.000479983	2.42	KFZ67_11340	193	K	K01637	E4.1.3.1, aceA; isocitrate lyase [EC:4.1.3.1]	Isocitrate lyase OS=Photobacterium damselae OX=38293 GN=aceA PE=4 SV=1	aceA	3	0.5808	17	HMIEAGAAGVHFEDQLASVK(1)K	1	3.27818e-44	142.43	1	3.27818e-44	142.43	1	2.72949e-36
map00630 Glyoxylate and dicarboxylate metabolism	0.000479983	2.42	KFZ67_11340	300	K	K01637	E4.1.3.1, aceA; isocitrate lyase [EC:4.1.3.1]	Isocitrate lyase OS=Photobacterium damselae OX=38293 GN=aceA PE=4 SV=1	aceA	3	-1.0828	11	K(1)FAEAIHAQYPDQILAYNCSPSFNWEK	1	7.91085e-34	120.15	1	2.99711e-24	100.24	1	7.91085e-34
map00630 Glyoxylate and dicarboxylate metabolism	0.000479983	2.42	KFZ67_11340	65	K	K01637	E4.1.3.1, aceA; isocitrate lyase [EC:4.1.3.1]	Isocitrate lyase OS=Photobacterium damselae OX=38293 GN=aceA PE=4 SV=1	aceA	3	-1.2379	4	K(1)GYVNCLGALTGGQAVQQAK	1	3.01126e-55	164.93	1	8.73608e-45	147.09	1	3.01126e-55
map00630 Glyoxylate and dicarboxylate metabolism	0.000479983	2.42	KFZ67_11340	250	K	K01637	E4.1.3.1, aceA; isocitrate lyase [EC:4.1.3.1]	Isocitrate lyase OS=Photobacterium damselae OX=38293 GN=aceA PE=4 SV=1	aceA	3	0.95001	7	TDANAADLLTSDCDPYDK(1)DFIVGER	1	1.12642e-23	98.299	1	3.23986e-07	61.417	1	1.12642e-23
map00630 Glyoxylate and dicarboxylate metabolism	0.000479983	2.42	KFZ67_11340	212	K	K01637	E4.1.3.1, aceA; isocitrate lyase [EC:4.1.3.1]	Isocitrate lyase OS=Photobacterium damselae OX=38293 GN=aceA PE=4 SV=1	aceA	2	-2.4183	3	VLVPTQEAVQK(1)LVAAR	1	9.54334e-13	108.58	1	5.31996e-06	71.98	1	9.54334e-13
map00630 Glyoxylate and dicarboxylate metabolism	0.000479983	2.42	KFZ67_11345	156	K	K01638	aceB, glcB; malate synthase [EC:2.3.3.9]	Malate synthase OS=Photobacterium damselae OX=38293 GN=aceB PE=3 SV=1	aceB	3	0.70886	6	HYQLK(1)EDPAVLICR	1	1.58213e-23	136.24	1	2.2046e-17	125.53	1	1.58213e-23
map00630 Glyoxylate and dicarboxylate metabolism	0.000479983	2.42	KFZ67_11345	352	K	K01638	aceB, glcB; malate synthase [EC:2.3.3.9]	Malate synthase OS=Photobacterium damselae OX=38293 GN=aceB PE=3 SV=1	aceB	4	-1.2304	2	IQTDK(1)SLEAHNGHDGTWVAHPGLADTAR	1	1.64713e-07	59.372	1	1.64713e-07	59.372	1	4.84233e-07
map00630 Glyoxylate and dicarboxylate metabolism	0.000479983	2.42	KFZ67_11345	347	K	K01638	aceB, glcB; malate synthase [EC:2.3.3.9]	Malate synthase OS=Photobacterium damselae OX=38293 GN=aceB PE=3 SV=1	aceB	2	1.836	6	NAWVLNK(1)IQTDK	1	1.25726e-11	122.34	1	1.25726e-11	122.34	1	3.1641e-10
map00630 Glyoxylate and dicarboxylate metabolism	0.000479983	2.42	KFZ67_12890	142	K	K00024	mdh; malate dehydrogenase [EC:1.1.1.37]	Malate dehydrogenase OS=Photobacterium damselae subsp. damselae OX=85581 GN=mdh PE=3 SV=1	mdh	2	-2.2154	3	K(1)LFGITTLDVIR	1	1.83179e-27	149.23	1	1.83179e-27	149.23	1	4.2682e-20
map00630 Glyoxylate and dicarboxylate metabolism	0.000479983	2.42	KFZ67_12890	162	K	K00024	mdh; malate dehydrogenase [EC:1.1.1.37]	Malate dehydrogenase OS=Photobacterium damselae subsp. damselae OX=85581 GN=mdh PE=3 SV=1	mdh	2	0.97471	3	SETFVAELK(1)GK	1	0.000294285	75.819	1	0.00106502	66.267	1	0.000294285
map00630 Glyoxylate and dicarboxylate metabolism	0.000479983	2.42	KFZ67_12890	21	K	K00024	mdh; malate dehydrogenase [EC:1.1.1.37]	Malate dehydrogenase OS=Photobacterium damselae subsp. damselae OX=85581 GN=mdh PE=3 SV=1	mdh	3	-0.24109	3	VAVIGAAGGIGQALALLLK(1)NR	1	2.19203e-53	148.41	1	2.23028e-27	118.31	1	2.19203e-53
map00630 Glyoxylate and dicarboxylate metabolism	0.000479983	2.42	KFZ67_13575	367	K	K01895	ACSS1_2, acs; acetyl-CoA synthetase [EC:6.2.1.1]	Acetyl-coenzyme A synthetase OS=Photobacterium damselae OX=38293 GN=acs PE=3 SV=1	acs	2	0.10714	16	ALMAK(1)GDEAIVDTSR	1	6.73423e-22	123.76	1	6.73423e-22	123.76	1	1.50243e-18
map00630 Glyoxylate and dicarboxylate metabolism	0.000479983	2.42	KFZ67_13575	640	K	K01895	ACSS1_2, acs; acetyl-CoA synthetase [EC:6.2.1.1]	Acetyl-coenzyme A synthetase OS=Photobacterium damselae OX=38293 GN=acs PE=3 SV=1	acs	3	0.2204	4	IATGDTSNLGDTSTLADPSVVEK(1)LIAEK	1	1.38514e-13	82.942	1	3.60515e-09	65.171	1	1.38514e-13
map00630 Glyoxylate and dicarboxylate metabolism	0.000479983	2.42	KFZ67_13575	645	K	K01895	ACSS1_2, acs; acetyl-CoA synthetase [EC:6.2.1.1]	Acetyl-coenzyme A synthetase OS=Photobacterium damselae OX=38293 GN=acs PE=3 SV=1	acs	2	0.10552	3	LIAEK(1)QQLL	1	0.00442148	61.679	1	0.0138315	49.536	1	0.00442148
map00630 Glyoxylate and dicarboxylate metabolism	0.000479983	2.42	KFZ67_13575	181	K	K01895	ACSS1_2, acs; acetyl-CoA synthetase [EC:6.2.1.1]	Acetyl-coenzyme A synthetase OS=Photobacterium damselae OX=38293 GN=acs PE=3 SV=1	acs	3	-0.031305	6	IIDSNAK(1)VVITADEGVR	1	1.38491e-08	85.421	1	1.38491e-08	85.421	1	7.93262e-08
map00630 Glyoxylate and dicarboxylate metabolism	0.000479983	2.42	KFZ67_13575	585	K	K01895	ACSS1_2, acs; acetyl-CoA synthetase [EC:6.2.1.1]	Acetyl-coenzyme A synthetase OS=Photobacterium damselae OX=38293 GN=acs PE=3 SV=1	acs	3	-0.53717	2	K(1)EIGPIATPDFLHWTDALPK	1	8.15194e-07	64.843	1	8.15194e-07	64.843	1	8.46284e-07
map00630 Glyoxylate and dicarboxylate metabolism	0.000479983	2.42	KFZ67_13575	617	K	K01895	ACSS1_2, acs; acetyl-CoA synthetase [EC:6.2.1.1]	Acetyl-coenzyme A synthetase OS=Photobacterium damselae OX=38293 GN=acs PE=3 SV=1	acs	3	2.0426	14	K(1)IATGDTSNLGDTSTLADPSVVEK	1	1.44189e-32	113.65	1	8.84848e-24	103.92	1	1.44189e-32
map00630 Glyoxylate and dicarboxylate metabolism	0.000479983	2.42	KFZ67_13575	348	K	K01895	ACSS1_2, acs; acetyl-CoA synthetase [EC:6.2.1.1]	Acetyl-coenzyme A synthetase OS=Photobacterium damselae OX=38293 GN=acs PE=3 SV=1	acs	3	1.4901	3	MSQVVDK(1)HQVNILYTAPTAIR	1	2.27558e-10	74.364	1	8.5193e-08	72.167	1	2.27558e-10
map00630 Glyoxylate and dicarboxylate metabolism	0.000479983	2.42	KFZ67_19420	922	K	K00281	GLDC, gcvP; glycine dehydrogenase [EC:1.4.4.2]	Glycine dehydrogenase (decarboxylating) OS=Photobacterium damselae subsp. damselae OX=85581 GN=gcvP PE=3 SV=1	gcvP	2	1.3758	2	ELACFPAK(1)HSR	1	0.000257698	77.124	1	0.000257698	77.124	1	0.00492508
map00630 Glyoxylate and dicarboxylate metabolism	0.000479983	2.42	KFZ67_19420	789	K	K00281	GLDC, gcvP; glycine dehydrogenase [EC:1.4.4.2]	Glycine dehydrogenase (decarboxylating) OS=Photobacterium damselae subsp. damselae OX=85581 GN=gcvP PE=3 SV=1	gcvP	2	0.69461	3	LAILNANYVK(1)AK	1	0.00126184	60.255	1	0.00275197	51.979	1	0.00126184
map00630 Glyoxylate and dicarboxylate metabolism	0.000479983	2.42	KFZ67_19420	303	K	K00281	GLDC, gcvP; glycine dehydrogenase [EC:1.4.4.2]	Glycine dehydrogenase (decarboxylating) OS=Photobacterium damselae subsp. damselae OX=85581 GN=gcvP PE=3 SV=1	gcvP	2	1.2073	6	VIGVSK(1)DSQGNQALR	1	3.70617e-37	156.81	1	3.70617e-37	156.81	1	1.09313e-28
map00630 Glyoxylate and dicarboxylate metabolism	0.000479983	2.42	KFZ67_19420	928	K	K00281	GLDC, gcvP; glycine dehydrogenase [EC:1.4.4.2]	Glycine dehydrogenase (decarboxylating) OS=Photobacterium damselae subsp. damselae OX=85581 GN=gcvP PE=3 SV=1	gcvP	2	3.2582	4	YSK(1)YWPTVNR	1	0.000300981	84.687	1	0.00108372	70.942	1	0.000300981
map00630 Glyoxylate and dicarboxylate metabolism	0.000479983	2.42	KFZ67_19430	85	K	K00605	gcvT, AMT; aminomethyltransferase [EC:2.1.2.10]	Aminomethyltransferase OS=Photobacterium damselae subsp. damselae OX=85581 GN=gcvT PE=3 SV=1	gcvT	3	-0.027891	4	LVPVDIIDLPVGK(1)QR	1	1.06058e-05	69.92	1	1.06058e-05	69.92	1	0.000752723
map00640 Propanoate metabolism	9.85911e-05	2.84	KFZ67_01985	256	K	K00382	DLD, lpd, pdhD; dihydrolipoamide dehydrogenase [EC:1.8.1.4]	Dihydrolipoyl dehydrogenase OS=Photobacterium damselae OX=38293 GN=lpdA PE=3 SV=1	lpdA	2	0.49886	3	EDGIYVSMEGK(1)K	1	0.000201095	75.739	1	0.000201095	75.739	1	0.00026044
map00640 Propanoate metabolism	9.85911e-05	2.84	KFZ67_01985	300	K	K00382	DLD, lpd, pdhD; dihydrolipoamide dehydrogenase [EC:1.8.1.4]	Dihydrolipoyl dehydrogenase OS=Photobacterium damselae OX=38293 GN=lpdA PE=3 SV=1	lpdA	2	-0.61459	7	GFIHVDK(1)QMR	1	1.1894e-07	114.97	1	0.000187872	89.679	1	1.1894e-07
map00640 Propanoate metabolism	9.85911e-05	2.84	KFZ67_01985	285	K	K00382	DLD, lpd, pdhD; dihydrolipoamide dehydrogenase [EC:1.8.1.4]	Dihydrolipoyl dehydrogenase OS=Photobacterium damselae OX=38293 GN=lpdA PE=3 SV=1	lpdA	2	0.00077076	3	LLDAEK(1)AGIEVDER	1	1.16173e-06	87.519	1	1.16173e-06	87.519	1	1.50465e-05
map00640 Propanoate metabolism	9.85911e-05	2.84	KFZ67_01985	152	K	K00382	DLD, lpd, pdhD; dihydrolipoamide dehydrogenase [EC:1.8.1.4]	Dihydrolipoyl dehydrogenase OS=Photobacterium damselae OX=38293 GN=lpdA PE=3 SV=1	lpdA	3	-0.61856	2	PIK(1)LPFIPHEDPR	1	0.000130685	73.927	1	0.000391848	65.043	1	0.000130685
map00640 Propanoate metabolism	9.85911e-05	2.84	KFZ67_01985	279	K	K00382	DLD, lpd, pdhD; dihydrolipoamide dehydrogenase [EC:1.8.1.4]	Dihydrolipoyl dehydrogenase OS=Photobacterium damselae OX=38293 GN=lpdA PE=3 SV=1	lpdA	2	-0.014866	6	VPNGK(1)LLDAEK	1	7.26591e-06	94.402	1	7.26591e-06	94.402	1	6.00796e-05
map00640 Propanoate metabolism	9.85911e-05	2.84	KFZ67_02005	387	K	K01682	acnB; aconitate hydratase 2 / 2-methylisocitrate dehydratase [EC:4.2.1.3 4.2.1.99]	Aconitate hydratase B OS=Photobacterium damselae subsp. damselae OX=85581 GN=acnB PE=3 SV=1	acnB	2	2.1684	6	GYTLAQK(1)MVGK	1	0.000309863	72.2	1	0.000309863	72.2	1	0.000468429
map00640 Propanoate metabolism	9.85911e-05	2.84	KFZ67_03145	136	K	K01962	accA; acetyl-CoA carboxylase carboxyl transferase subunit alpha [EC:6.4.1.2 2.1.3.15]	Acetyl-coenzyme A carboxylase carboxyl transferase subunit alpha OS=Photobacterium damselae subsp. damselae OX=85581 GN=accA PE=3 SV=1	accA	2	-0.23154	2	NFGMPK(1)PEGYR	1	0.000148501	81.017	1	0.000148501	81.017	1	0.000991815
map00640 Propanoate metabolism	9.85911e-05	2.84	KFZ67_03890	473	K	K13788	pta; phosphate acetyltransferase [EC:2.3.1.8]	Phosphate acetyltransferase OS=Photobacterium damselae OX=38293 GN=pta PE=3 SV=1	pta	2	-1.4276	2	GAK(1)GMTEVVAR	1	0.000200726	75.416	1	0.000200726	75.416	1	0.00315164
map00640 Propanoate metabolism	9.85911e-05	2.84	KFZ67_03890	413	K	K13788	pta; phosphate acetyltransferase [EC:2.3.1.8]	Phosphate acetyltransferase OS=Photobacterium damselae OX=38293 GN=pta PE=3 SV=1	pta	2	-0.46396	3	TVK(1)AAAICAER	1	0.000208333	78.884	1	0.000564993	71.268	1	0.000208333
map00640 Propanoate metabolism	9.85911e-05	2.84	KFZ67_03890	33	K	K13788	pta; phosphate acetyltransferase [EC:2.3.1.8]	Phosphate acetyltransferase OS=Photobacterium damselae OX=38293 GN=pta PE=3 SV=1	pta	2	-1.5228	2	VSFFK(1)PIAQPR	1	0.000240294	77.744	1	0.00355096	54.486	1	0.000240294
map00640 Propanoate metabolism	9.85911e-05	2.84	KFZ67_03895	292	K	K00925	ackA; acetate kinase [EC:2.7.2.1]	Acetate kinase OS=Photobacterium damselae OX=38293 GN=ackA_1 PE=3 SV=1	ackA_1	2	-1.0422	6	FVEDNYGDK(1)EEATR	1	1.45219e-23	139.86	1	0.000558701	57.288	1	1.45219e-23
map00640 Propanoate metabolism	9.85911e-05	2.84	KFZ67_03960	232	K	K00656	E2.3.1.54, pflD; formate C-acetyltransferase [EC:2.3.1.54]	Formate C-acetyltransferase OS=Photobacterium damselae OX=38293 GN=pflB PE=4 SV=1	pflB	2	-0.84425	3	ALGQIK(1)AMAAK	1	9.4841e-06	89.913	1	9.80932e-05	80.986	1	9.4841e-06
map00640 Propanoate metabolism	9.85911e-05	2.84	KFZ67_03960	612	K	K00656	E2.3.1.54, pflD; formate C-acetyltransferase [EC:2.3.1.54]	Formate C-acetyltransferase OS=Photobacterium damselae OX=38293 GN=pflB PE=4 SV=1	pflB	3	0.038674	3	DAIPTQSILTITSNVVYGK(1)K	1	1.02046e-07	72.21	1	7.97813e-07	65.022	1	1.02046e-07
map00640 Propanoate metabolism	9.85911e-05	2.84	KFZ67_03960	640	K	K00656	E2.3.1.54, pflD; formate C-acetyltransferase [EC:2.3.1.54]	Formate C-acetyltransferase OS=Photobacterium damselae OX=38293 GN=pflB PE=4 SV=1	pflB	2	2.0227	11	DEK(1)GAVASLTSVGK	1	5.80887e-13	115.68	1	1.27677e-06	86.497	1	5.80887e-13
map00640 Propanoate metabolism	9.85911e-05	2.84	KFZ67_03960	718	K	K00656	E2.3.1.54, pflD; formate C-acetyltransferase [EC:2.3.1.54]	Formate C-acetyltransferase OS=Photobacterium damselae OX=38293 GN=pflB PE=4 SV=1	pflB	2	0.10825	3	ETLEDAVK(1)HPEK	1	0.000241457	74.987	1	0.00105583	62.088	1	0.000241457
map00640 Propanoate metabolism	9.85911e-05	2.84	KFZ67_03960	722	K	K00656	E2.3.1.54, pflD; formate C-acetyltransferase [EC:2.3.1.54]	Formate C-acetyltransferase OS=Photobacterium damselae OX=38293 GN=pflB PE=4 SV=1	pflB	2	-0.44313	5	HPEK(1)YPQLTIR	1	7.84229e-10	120.55	1	7.39802e-07	105.03	1	7.84229e-10
map00640 Propanoate metabolism	9.85911e-05	2.84	KFZ67_03960	159	K	K00656	E2.3.1.54, pflD; formate C-acetyltransferase [EC:2.3.1.54]	Formate C-acetyltransferase OS=Photobacterium damselae OX=38293 GN=pflB PE=4 SV=1	pflB	2	0.14041	13	K(1)SGVLTGLPDAYGR	1	3.29549e-80	206.49	1	3.29549e-80	206.49	1	9.0792e-42
map00640 Propanoate metabolism	9.85911e-05	2.84	KFZ67_03960	121	K	K00656	E2.3.1.54, pflD; formate C-acetyltransferase [EC:2.3.1.54]	Formate C-acetyltransferase OS=Photobacterium damselae OX=38293 GN=pflB PE=4 SV=1	pflB	2	0.60346	5	MIEGSCK(1)VYGR	1	1.35601e-11	120.06	1	1.35601e-11	110.39	1	6.50711e-10
map00640 Propanoate metabolism	9.85911e-05	2.84	KFZ67_04275	10	K	K01963	accD; acetyl-CoA carboxylase carboxyl transferase subunit beta [EC:6.4.1.2 2.1.3.15]	Acetyl-coenzyme A carboxylase carboxyl transferase subunit beta OS=Photobacterium damselae subsp. damselae OX=85581 GN=accD PE=3 SV=1	accD	2	0.1021	3	ILTK(1)SNIVTSR	1	1.12446e-09	119.74	1	9.70305e-07	103.43	1	1.12446e-09
map00640 Propanoate metabolism	9.85911e-05	2.84	KFZ67_09505	28	K	K00626	E2.3.1.9, atoB; acetyl-CoA C-acetyltransferase [EC:2.3.1.9]	Acetyl-CoA C-acetyltransferase OS=Photobacterium damselae OX=38293 GN=CTM90_05090 PE=3 SV=1	CTM90_05090	2	-0.19634	3	DQAAGK(1)IAAEVIK	1	0.00072526	60.861	1	0.000903038	58.885	1	0.00072526
map00640 Propanoate metabolism	9.85911e-05	2.84	KFZ67_09505	345	K	K00626	E2.3.1.9, atoB; acetyl-CoA C-acetyltransferase [EC:2.3.1.9]	Acetyl-CoA C-acetyltransferase OS=Photobacterium damselae OX=38293 GN=CTM90_05090 PE=3 SV=1	CTM90_05090	4	1.9422	4	HQVEASDIIAK(1)ANLNGGAIALGHPLGASGNR	1	4.73063e-14	82.91	1	1.28533e-13	78.383	1	4.73063e-14
map00640 Propanoate metabolism	9.85911e-05	2.84	KFZ67_09505	10	K	K00626	E2.3.1.9, atoB; acetyl-CoA C-acetyltransferase [EC:2.3.1.9]	Acetyl-CoA C-acetyltransferase OS=Photobacterium damselae OX=38293 GN=CTM90_05090 PE=3 SV=1	CTM90_05090	2	0.69125	6	VFIVAAK(1)R	1	7.27634e-17	143	1	3.68027e-11	128.57	1	7.27634e-17
map00640 Propanoate metabolism	9.85911e-05	2.84	KFZ67_09945	262	K	K01902	sucD; succinyl-CoA synthetase alpha subunit [EC:6.2.1.5]	Succinate--CoA ligase [ADP-forming] subunit alpha OS=Photobacterium damselae subsp. damselae OX=85581 GN=sucD PE=3 SV=1	sucD	2	2.396	4	GTAEDK(1)FAALEAAGVR	1	7.66738e-06	70.451	1	1.19744e-05	67.646	1	7.66738e-06
map00640 Propanoate metabolism	9.85911e-05	2.84	KFZ67_09945	243	K	K01902	sucD; succinyl-CoA synthetase alpha subunit [EC:6.2.1.5]	Succinate--CoA ligase [ADP-forming] subunit alpha OS=Photobacterium damselae subsp. damselae OX=85581 GN=sucD PE=3 SV=1	sucD	3	0.028747	4	PVVSYIAGVTAPPGK(1)R	1	2.43283e-05	59.864	1	2.43283e-05	59.864	1	5.41189e-05
map00640 Propanoate metabolism	9.85911e-05	2.84	KFZ67_09945	228	K	K01902	sucD; succinyl-CoA synthetase alpha subunit [EC:6.2.1.5]	Succinate--CoA ligase [ADP-forming] subunit alpha OS=Photobacterium damselae subsp. damselae OX=85581 GN=sucD PE=3 SV=1	sucD	3	-0.51358	4	QHVTK(1)PVVSYIAGVTAPPGK	1	5.05431e-22	112.82	1	5.05431e-22	112.82	1	6.34281e-22
map00640 Propanoate metabolism	9.85911e-05	2.84	KFZ67_09945	7	K	K01902	sucD; succinyl-CoA synthetase alpha subunit [EC:6.2.1.5]	Succinate--CoA ligase [ADP-forming] subunit alpha OS=Photobacterium damselae subsp. damselae OX=85581 GN=sucD PE=3 SV=1	sucD	2	0.6527	3	SILINK(1)DTK	1	1.02589e-07	119.68	1	1.02589e-07	119.68	1	1.02589e-07
map00640 Propanoate metabolism	9.85911e-05	2.84	KFZ67_09950	380	K	K01903	sucC; succinyl-CoA synthetase beta subunit [EC:6.2.1.5]	Succinate--CoA ligase [ADP-forming] subunit beta OS=Photobacterium damselae OX=38293 GN=sucC PE=3 SV=1	sucC	3	-1.4071	3	LAESGLNIIAATSLTEAAEK(1)VVQAAEGK	1	3.00553e-35	111.4	1	3.00553e-35	111.4	1	2.43255e-26
map00640 Propanoate metabolism	9.85911e-05	2.84	KFZ67_09950	79	K	K01903	sucC; succinyl-CoA synthetase beta subunit [EC:6.2.1.5]	Succinate--CoA ligase [ADP-forming] subunit beta OS=Photobacterium damselae OX=38293 GN=sucC PE=3 SV=1	sucC	3	-0.12504	5	TFSQQWLGK(1)HLVTYQTDANGQPVSK	1	1.0675e-23	98.918	1	1.0675e-23	98.918	1	3.55625e-11
map00640 Propanoate metabolism	9.85911e-05	2.84	KFZ67_10375	366	K	K01782	fadJ; 3-hydroxyacyl-CoA dehydrogenase / enoyl-CoA hydratase / 3-hydroxybutyryl-CoA epimerase [EC:1.1.1.35 4.2.1.17 5.1.2.3]	Fatty acid oxidation complex subunit alpha OS=Photobacterium damselae OX=38293 GN=BST98_10320 PE=3 SV=1	BST98_10320	2	-0.46309	3	IISK(1)AQLQK	1	0.000320728	92.838	1	0.00155125	78.113	1	0.000320728
map00640 Propanoate metabolism	9.85911e-05	2.84	KFZ67_10375	232	K	K01782	fadJ; 3-hydroxyacyl-CoA dehydrogenase / enoyl-CoA hydratase / 3-hydroxybutyryl-CoA epimerase [EC:1.1.1.35 4.2.1.17 5.1.2.3]	Fatty acid oxidation complex subunit alpha OS=Photobacterium damselae OX=38293 GN=BST98_10320 PE=3 SV=1	BST98_10320	2	0.50631	3	SVVFDQAK(1)K	1	0.00393358	61.78	1	0.00484429	59.908	1	0.00393358
map00640 Propanoate metabolism	9.85911e-05	2.84	KFZ67_13575	367	K	K01895	ACSS1_2, acs; acetyl-CoA synthetase [EC:6.2.1.1]	Acetyl-coenzyme A synthetase OS=Photobacterium damselae OX=38293 GN=acs PE=3 SV=1	acs	2	0.10714	16	ALMAK(1)GDEAIVDTSR	1	6.73423e-22	123.76	1	6.73423e-22	123.76	1	1.50243e-18
map00640 Propanoate metabolism	9.85911e-05	2.84	KFZ67_13575	640	K	K01895	ACSS1_2, acs; acetyl-CoA synthetase [EC:6.2.1.1]	Acetyl-coenzyme A synthetase OS=Photobacterium damselae OX=38293 GN=acs PE=3 SV=1	acs	3	0.2204	4	IATGDTSNLGDTSTLADPSVVEK(1)LIAEK	1	1.38514e-13	82.942	1	3.60515e-09	65.171	1	1.38514e-13
map00640 Propanoate metabolism	9.85911e-05	2.84	KFZ67_13575	645	K	K01895	ACSS1_2, acs; acetyl-CoA synthetase [EC:6.2.1.1]	Acetyl-coenzyme A synthetase OS=Photobacterium damselae OX=38293 GN=acs PE=3 SV=1	acs	2	0.10552	3	LIAEK(1)QQLL	1	0.00442148	61.679	1	0.0138315	49.536	1	0.00442148
map00640 Propanoate metabolism	9.85911e-05	2.84	KFZ67_13575	181	K	K01895	ACSS1_2, acs; acetyl-CoA synthetase [EC:6.2.1.1]	Acetyl-coenzyme A synthetase OS=Photobacterium damselae OX=38293 GN=acs PE=3 SV=1	acs	3	-0.031305	6	IIDSNAK(1)VVITADEGVR	1	1.38491e-08	85.421	1	1.38491e-08	85.421	1	7.93262e-08
map00640 Propanoate metabolism	9.85911e-05	2.84	KFZ67_13575	585	K	K01895	ACSS1_2, acs; acetyl-CoA synthetase [EC:6.2.1.1]	Acetyl-coenzyme A synthetase OS=Photobacterium damselae OX=38293 GN=acs PE=3 SV=1	acs	3	-0.53717	2	K(1)EIGPIATPDFLHWTDALPK	1	8.15194e-07	64.843	1	8.15194e-07	64.843	1	8.46284e-07
map00640 Propanoate metabolism	9.85911e-05	2.84	KFZ67_13575	617	K	K01895	ACSS1_2, acs; acetyl-CoA synthetase [EC:6.2.1.1]	Acetyl-coenzyme A synthetase OS=Photobacterium damselae OX=38293 GN=acs PE=3 SV=1	acs	3	2.0426	14	K(1)IATGDTSNLGDTSTLADPSVVEK	1	1.44189e-32	113.65	1	8.84848e-24	103.92	1	1.44189e-32
map00640 Propanoate metabolism	9.85911e-05	2.84	KFZ67_13575	348	K	K01895	ACSS1_2, acs; acetyl-CoA synthetase [EC:6.2.1.1]	Acetyl-coenzyme A synthetase OS=Photobacterium damselae OX=38293 GN=acs PE=3 SV=1	acs	3	1.4901	3	MSQVVDK(1)HQVNILYTAPTAIR	1	2.27558e-10	74.364	1	8.5193e-08	72.167	1	2.27558e-10
map00640 Propanoate metabolism	9.85911e-05	2.84	KFZ67_18295	75	K	K08325	yqhD; NADP-dependent alcohol dehydrogenase [EC:1.1.-.-]	NADH-dependent alcohol dehydrogenase OS=Photobacterium damselae subsp. damselae OX=85581 GN=CAY62_19195 PE=4 SV=1	CAY62_19195	2	-0.79724	2	ETLDK(1)AVAIVK	1	0.0120667	43.897	1	0.0120667	43.897	1	0.0158443
map00640 Propanoate metabolism	9.85911e-05	2.84	KFZ67_18295	41	K	K08325	yqhD; NADP-dependent alcohol dehydrogenase [EC:1.1.-.-]	NADH-dependent alcohol dehydrogenase OS=Photobacterium damselae subsp. damselae OX=85581 GN=CAY62_19195 PE=4 SV=1	CAY62_19195	2	0.37383	3	VLVIYGGGSIK(1)K	1	0.000446395	70.089	1	0.000446395	70.089	1	0.000446395
map00650 Butanoate metabolism	0.316452	1.25	KFZ67_02865	28	K	K01580	E4.1.1.15, gadB, gadA, GAD; glutamate decarboxylase [EC:4.1.1.15]	Glutamate decarboxylase OS=Photobacterium damselae subsp. damselae OX=85581 GN=gadA PE=3 SV=1	gadA	3	1.521	5	EQGADPIFGSDALSHIASSK(1)K	1	7.9544e-16	91.276	1	9.90997e-16	89.663	1	7.9544e-16
map00650 Butanoate metabolism	0.316452	1.25	KFZ67_02865	29	K	K01580	E4.1.1.15, gadB, gadA, GAD; glutamate decarboxylase [EC:4.1.1.15]	Glutamate decarboxylase OS=Photobacterium damselae subsp. damselae OX=85581 GN=gadA PE=3 SV=1	gadA	3	-2.6209	3	K(1)MPQQEQSPQAIYQMIR	1	2.70225e-06	68.481	1	9.05945e-05	52.172	1	2.70225e-06
map00650 Butanoate metabolism	0.316452	1.25	KFZ67_02865	423	K	K01580	E4.1.1.15, gadB, gadA, GAD; glutamate decarboxylase [EC:4.1.1.15]	Glutamate decarboxylase OS=Photobacterium damselae subsp. damselae OX=85581 GN=gadA PE=3 SV=1	gadA	3	-1.5077	4	ILVK(1)QGFSQDLANLLIK	1	1.39452e-06	71.354	1	9.56032e-06	60.489	1	1.39452e-06
map00650 Butanoate metabolism	0.316452	1.25	KFZ67_03960	232	K	K00656	E2.3.1.54, pflD; formate C-acetyltransferase [EC:2.3.1.54]	Formate C-acetyltransferase OS=Photobacterium damselae OX=38293 GN=pflB PE=4 SV=1	pflB	2	-0.84425	3	ALGQIK(1)AMAAK	1	9.4841e-06	89.913	1	9.80932e-05	80.986	1	9.4841e-06
map00650 Butanoate metabolism	0.316452	1.25	KFZ67_03960	612	K	K00656	E2.3.1.54, pflD; formate C-acetyltransferase [EC:2.3.1.54]	Formate C-acetyltransferase OS=Photobacterium damselae OX=38293 GN=pflB PE=4 SV=1	pflB	3	0.038674	3	DAIPTQSILTITSNVVYGK(1)K	1	1.02046e-07	72.21	1	7.97813e-07	65.022	1	1.02046e-07
map00650 Butanoate metabolism	0.316452	1.25	KFZ67_03960	640	K	K00656	E2.3.1.54, pflD; formate C-acetyltransferase [EC:2.3.1.54]	Formate C-acetyltransferase OS=Photobacterium damselae OX=38293 GN=pflB PE=4 SV=1	pflB	2	2.0227	11	DEK(1)GAVASLTSVGK	1	5.80887e-13	115.68	1	1.27677e-06	86.497	1	5.80887e-13
map00650 Butanoate metabolism	0.316452	1.25	KFZ67_03960	718	K	K00656	E2.3.1.54, pflD; formate C-acetyltransferase [EC:2.3.1.54]	Formate C-acetyltransferase OS=Photobacterium damselae OX=38293 GN=pflB PE=4 SV=1	pflB	2	0.10825	3	ETLEDAVK(1)HPEK	1	0.000241457	74.987	1	0.00105583	62.088	1	0.000241457
map00650 Butanoate metabolism	0.316452	1.25	KFZ67_03960	722	K	K00656	E2.3.1.54, pflD; formate C-acetyltransferase [EC:2.3.1.54]	Formate C-acetyltransferase OS=Photobacterium damselae OX=38293 GN=pflB PE=4 SV=1	pflB	2	-0.44313	5	HPEK(1)YPQLTIR	1	7.84229e-10	120.55	1	7.39802e-07	105.03	1	7.84229e-10
map00650 Butanoate metabolism	0.316452	1.25	KFZ67_03960	159	K	K00656	E2.3.1.54, pflD; formate C-acetyltransferase [EC:2.3.1.54]	Formate C-acetyltransferase OS=Photobacterium damselae OX=38293 GN=pflB PE=4 SV=1	pflB	2	0.14041	13	K(1)SGVLTGLPDAYGR	1	3.29549e-80	206.49	1	3.29549e-80	206.49	1	9.0792e-42
map00650 Butanoate metabolism	0.316452	1.25	KFZ67_03960	121	K	K00656	E2.3.1.54, pflD; formate C-acetyltransferase [EC:2.3.1.54]	Formate C-acetyltransferase OS=Photobacterium damselae OX=38293 GN=pflB PE=4 SV=1	pflB	2	0.60346	5	MIEGSCK(1)VYGR	1	1.35601e-11	120.06	1	1.35601e-11	110.39	1	6.50711e-10
map00650 Butanoate metabolism	0.316452	1.25	KFZ67_06020	42	K	K00209	fabV, ter; enoyl-[acyl-carrier protein] reductase / trans-2-enoyl-CoA reductase (NAD+) [EC:1.3.1.9 1.3.1.44]	Enoyl-[acyl-carrier-protein] reductase [NADH] OS=Photobacterium damselae OX=38293 GN=fabV PE=3 SV=1	fabV	2	-1.0306	3	AQGPIANAPK(1)R	1	1.23408e-06	100.58	1	1.55546e-05	88.056	1	1.23408e-06
map00650 Butanoate metabolism	0.316452	1.25	KFZ67_06020	118	K	K00209	fabV, ter; enoyl-[acyl-carrier protein] reductase / trans-2-enoyl-CoA reductase (NAD+) [EC:1.3.1.9 1.3.1.44]	Enoyl-[acyl-carrier-protein] reductase [NADH] OS=Photobacterium damselae OX=38293 GN=fabV PE=3 SV=1	fabV	2	-1.2581	5	SLNGDAFSNEAK(1)QK	1	0.000367668	60.55	1	0.000367668	60.55	1	0.000650333
map00650 Butanoate metabolism	0.316452	1.25	KFZ67_09505	28	K	K00626	E2.3.1.9, atoB; acetyl-CoA C-acetyltransferase [EC:2.3.1.9]	Acetyl-CoA C-acetyltransferase OS=Photobacterium damselae OX=38293 GN=CTM90_05090 PE=3 SV=1	CTM90_05090	2	-0.19634	3	DQAAGK(1)IAAEVIK	1	0.00072526	60.861	1	0.000903038	58.885	1	0.00072526
map00650 Butanoate metabolism	0.316452	1.25	KFZ67_09505	345	K	K00626	E2.3.1.9, atoB; acetyl-CoA C-acetyltransferase [EC:2.3.1.9]	Acetyl-CoA C-acetyltransferase OS=Photobacterium damselae OX=38293 GN=CTM90_05090 PE=3 SV=1	CTM90_05090	4	1.9422	4	HQVEASDIIAK(1)ANLNGGAIALGHPLGASGNR	1	4.73063e-14	82.91	1	1.28533e-13	78.383	1	4.73063e-14
map00650 Butanoate metabolism	0.316452	1.25	KFZ67_09505	10	K	K00626	E2.3.1.9, atoB; acetyl-CoA C-acetyltransferase [EC:2.3.1.9]	Acetyl-CoA C-acetyltransferase OS=Photobacterium damselae OX=38293 GN=CTM90_05090 PE=3 SV=1	CTM90_05090	2	0.69125	6	VFIVAAK(1)R	1	7.27634e-17	143	1	3.68027e-11	128.57	1	7.27634e-17
map00650 Butanoate metabolism	0.316452	1.25	KFZ67_09970	267	K	K00239	sdhA, frdA; succinate dehydrogenase / fumarate reductase, flavoprotein subunit [EC:1.3.5.1 1.3.5.4]	Succinate dehydrogenase flavoprotein subunit OS=Photobacterium damselae OX=38293 GN=sdhA PE=3 SV=1	sdhA	2	-0.44072	3	GEGGYLLNK(1)DGER	1	0.00126184	54.898	1	0.00177311	49.216	1	0.00126184
map00650 Butanoate metabolism	0.316452	1.25	KFZ67_09970	320	K	K00239	sdhA, frdA; succinate dehydrogenase / fumarate reductase, flavoprotein subunit [EC:1.3.5.1 1.3.5.4]	Succinate dehydrogenase flavoprotein subunit OS=Photobacterium damselae OX=38293 GN=sdhA PE=3 SV=1	sdhA	2	1.5562	3	LDHLGK(1)EVLESR	1	6.18548e-05	83.204	1	6.18548e-05	83.204	1	0.00015781
map00650 Butanoate metabolism	0.316452	1.25	KFZ67_09970	124	K	K00239	sdhA, frdA; succinate dehydrogenase / fumarate reductase, flavoprotein subunit [EC:1.3.5.1 1.3.5.4]	Succinate dehydrogenase flavoprotein subunit OS=Photobacterium damselae OX=38293 GN=sdhA PE=3 SV=1	sdhA	2	0.056288	3	PFGGQSK(1)EFGGEQAAR	1	2.13975e-08	90.348	1	8.05754e-06	70.197	1	2.13975e-08
map00650 Butanoate metabolism	0.316452	1.25	KFZ67_09970	281	K	K00239	sdhA, frdA; succinate dehydrogenase / fumarate reductase, flavoprotein subunit [EC:1.3.5.1 1.3.5.4]	Succinate dehydrogenase flavoprotein subunit OS=Photobacterium damselae OX=38293 GN=sdhA PE=3 SV=1	sdhA	2	-1.3261	3	YAPNAK(1)DLAGR	1	0.00210855	59.265	1	0.00210855	59.265	1	0.00361625
map00650 Butanoate metabolism	0.316452	1.25	KFZ67_10375	366	K	K01782	fadJ; 3-hydroxyacyl-CoA dehydrogenase / enoyl-CoA hydratase / 3-hydroxybutyryl-CoA epimerase [EC:1.1.1.35 4.2.1.17 5.1.2.3]	Fatty acid oxidation complex subunit alpha OS=Photobacterium damselae OX=38293 GN=BST98_10320 PE=3 SV=1	BST98_10320	2	-0.46309	3	IISK(1)AQLQK	1	0.000320728	92.838	1	0.00155125	78.113	1	0.000320728
map00650 Butanoate metabolism	0.316452	1.25	KFZ67_10375	232	K	K01782	fadJ; 3-hydroxyacyl-CoA dehydrogenase / enoyl-CoA hydratase / 3-hydroxybutyryl-CoA epimerase [EC:1.1.1.35 4.2.1.17 5.1.2.3]	Fatty acid oxidation complex subunit alpha OS=Photobacterium damselae OX=38293 GN=BST98_10320 PE=3 SV=1	BST98_10320	2	0.50631	3	SVVFDQAK(1)K	1	0.00393358	61.78	1	0.00484429	59.908	1	0.00393358
map00650 Butanoate metabolism	0.316452	1.25	KFZ67_13470	258	K	K00244	frdA; fumarate reductase flavoprotein subunit [EC:1.3.5.4]	Fumarate reductase flavoprotein subunit OS=Photobacterium damselae OX=38293 GN=CTM90_17535 PE=3 SV=1	CTM90_17535	2	-1.6945	6	GEGGIIVNK(1)NGYR	1	2.09353e-12	111.52	1	0.00033581	72.29	1	2.09353e-12
map00650 Butanoate metabolism	0.316452	1.25	KFZ67_13470	591	K	K00244	frdA; fumarate reductase flavoprotein subunit [EC:1.3.5.4]	Fumarate reductase flavoprotein subunit OS=Photobacterium damselae OX=38293 GN=CTM90_17535 PE=3 SV=1	CTM90_17535	3	0.13956	2	LYGAAAEEAAAK(1)EAAEQQEK	1	3.54712e-10	78.78	1	3.41824e-07	69.422	1	3.54712e-10
map00680 Methane metabolism	0.000773184	2.13	KFZ67_00790	85	K	K15633	gpmI; 2,3-bisphosphoglycerate-independent phosphoglycerate mutase [EC:5.4.2.12]	2,3-bisphosphoglycerate-independent phosphoglycerate mutase OS=Photobacterium damselae OX=38293 GN=gpmI PE=3 SV=1	gpmI	3	1.0038	4	ITK(1)AISDGEFFENDVLVAAMDAAIK	1	1.0874e-07	69.284	1	1.0874e-07	69.284	1	3.09664e-05
map00680 Methane metabolism	0.000773184	2.13	KFZ67_00790	5	K	K15633	gpmI; 2,3-bisphosphoglycerate-independent phosphoglycerate mutase [EC:5.4.2.12]	2,3-bisphosphoglycerate-independent phosphoglycerate mutase OS=Photobacterium damselae OX=38293 GN=gpmI PE=3 SV=1	gpmI	3	0.59951	3	K(1)PLALVILDGWGYR	1	7.4024e-10	98.337	1	7.4024e-10	98.337	1	4.98505e-05
map00680 Methane metabolism	0.000773184	2.13	KFZ67_00790	480	K	K15633	gpmI; 2,3-bisphosphoglycerate-independent phosphoglycerate mutase [EC:5.4.2.12]	2,3-bisphosphoglycerate-independent phosphoglycerate mutase OS=Photobacterium damselae OX=38293 GN=gpmI PE=3 SV=1	gpmI	2	1.5935	4	SLTLK(1)DNGK	1	4.4525e-24	148.52	1	4.99976e-24	147.2	1	4.4525e-24
map00680 Methane metabolism	0.000773184	2.13	KFZ67_00835	215	K	K00850	pfkA, PFK; 6-phosphofructokinase 1 [EC:2.7.1.11]	ATP-dependent 6-phosphofructokinase OS=Photobacterium damselae OX=38293 GN=pfkA PE=3 SV=1	pfkA	3	1.7226	3	K(1)HAIIAITELMTDVNELAK	1	2.59634e-12	94.281	1	8.68522e-12	85.937	1	2.59634e-12
map00680 Methane metabolism	0.000773184	2.13	KFZ67_00945	156	K	K01595	ppc; phosphoenolpyruvate carboxylase [EC:4.1.1.31]	Phosphoenolpyruvate carboxylase OS=Photobacterium damselae OX=38293 GN=ppc PE=3 SV=1	ppc	2	2.0717	3	LVQINK(1)CLSK	1	0.000452132	81.335	1	0.000466514	81.017	1	0.000452132
map00680 Methane metabolism	0.000773184	2.13	KFZ67_02335	72	K	K01624	FBA, fbaA; fructose-bisphosphate aldolase, class II [EC:4.1.2.13]	Fructose-bisphosphate aldolase OS=Photobacterium damselae OX=38293 GN=fbaA PE=3 SV=1	fbaA	3	2.129	2	APVIVQFSNGGAAFFAGK(1)GLK	1	9.91832e-36	133.94	1	3.94466e-35	131.67	1	9.91832e-36
map00680 Methane metabolism	0.000773184	2.13	KFZ67_02335	75	K	K01624	FBA, fbaA; fructose-bisphosphate aldolase, class II [EC:4.1.2.13]	Fructose-bisphosphate aldolase OS=Photobacterium damselae OX=38293 GN=fbaA PE=3 SV=1	fbaA	2	1.6554	6	GLK(1)LEGQEAQIK	1	8.87281e-06	87.719	1	0.00424577	63.091	1	8.87281e-06
map00680 Methane metabolism	0.000773184	2.13	KFZ67_02335	29	K	K01624	FBA, fbaA; fructose-bisphosphate aldolase, class II [EC:4.1.2.13]	Fructose-bisphosphate aldolase OS=Photobacterium damselae OX=38293 GN=fbaA PE=3 SV=1	fbaA	3	-1.3666	2	ENK(1)FALPAVNVVNTDTINGVLEAAAK	1	1.71893e-11	80.02	1	1.71893e-11	80.02	1	1.01532e-07
map00680 Methane metabolism	0.000773184	2.13	KFZ67_02335	325	K	K01624	FBA, fbaA; fructose-bisphosphate aldolase, class II [EC:4.1.2.13]	Fructose-bisphosphate aldolase OS=Photobacterium damselae OX=38293 GN=fbaA PE=3 SV=1	fbaA	3	-0.39934	10	KFEAENHDYLQGQIGNPTGPDAPNK(1)K	1	1.11269e-42	130.98	1	9.16463e-33	114.75	1	1.11269e-42
map00680 Methane metabolism	0.000773184	2.13	KFZ67_02335	84	K	K01624	FBA, fbaA; fructose-bisphosphate aldolase, class II [EC:4.1.2.13]	Fructose-bisphosphate aldolase OS=Photobacterium damselae OX=38293 GN=fbaA PE=3 SV=1	fbaA	2	0.40311	5	LEGQEAQIK(1)GAVAGAK	1	9.57618e-09	94.487	1	9.57618e-09	94.487	1	2.26457e-08
map00680 Methane metabolism	0.000773184	2.13	KFZ67_02335	20	K	K01624	FBA, fbaA; fructose-bisphosphate aldolase, class II [EC:4.1.2.13]	Fructose-bisphosphate aldolase OS=Photobacterium damselae OX=38293 GN=fbaA PE=3 SV=1	fbaA	3	0.52701	5	IFDFVKPGVISGDDVQK(1)VFEVAK	1	4.81435e-22	107.21	0.999677	5.6263e-07	64.749	1	4.81435e-22
map00680 Methane metabolism	0.000773184	2.13	KFZ67_02335	26	K	K01624	FBA, fbaA; fructose-bisphosphate aldolase, class II [EC:4.1.2.13]	Fructose-bisphosphate aldolase OS=Photobacterium damselae OX=38293 GN=fbaA PE=3 SV=1	fbaA	2	1.0733	6	VFEVAK(1)ENK	1	1.00106e-07	119.75	1	1.00106e-07	119.75	1	3.84516e-05
map00680 Methane metabolism	0.000773184	2.13	KFZ67_02335	301	K	K01624	FBA, fbaA; fructose-bisphosphate aldolase, class II [EC:4.1.2.13]	Fructose-bisphosphate aldolase OS=Photobacterium damselae OX=38293 GN=fbaA PE=3 SV=1	fbaA	3	0.21001	8	K(1)FEAENHDYLQGQIGNPTGPDAPNK	1	2.10236e-16	86.18	1	1.18301e-07	69.284	1	2.10236e-16
map00680 Methane metabolism	0.000773184	2.13	KFZ67_02335	113	K	K01624	FBA, fbaA; fructose-bisphosphate aldolase, class II [EC:4.1.2.13]	Fructose-bisphosphate aldolase OS=Photobacterium damselae OX=38293 GN=fbaA PE=3 SV=1	fbaA	5	-0.76607	13	YVHAIAETYGVPVILHTDHAAK(1)K	1	1.63571e-44	136.49	1	3.60001e-35	122.94	1	1.63571e-44
map00680 Methane metabolism	0.000773184	2.13	KFZ67_02535	427	K	K01689	ENO, eno; enolase [EC:4.2.1.11]	Enolase OS=Photobacterium damselae OX=38293 GN=eno PE=3 SV=1	eno	2	-0.59808	8	APFNGLK(1)EVK	1	0.000183885	89.9	1	0.00111448	70.675	1	0.000183885
map00680 Methane metabolism	0.000773184	2.13	KFZ67_02535	85	K	K01689	ENO, eno; enolase [EC:4.2.1.11]	Enolase OS=Photobacterium damselae OX=38293 GN=eno PE=3 SV=1	eno	3	-1.2424	15	DAK(1)DQAAIDQIMIDLDGTENK	1	7.41891e-64	162.73	1	7.41891e-64	162.73	1	2.42034e-53
map00680 Methane metabolism	0.000773184	2.13	KFZ67_02535	255	K	K01689	ENO, eno; enolase [EC:4.2.1.11]	Enolase OS=Photobacterium damselae OX=38293 GN=eno PE=3 SV=1	eno	3	4.3109	11	DVTLAMDCAASEFYNK(1)EEGIYDLK	1	1.54896e-23	98.3	1	6.03072e-08	71.651	1	1.54896e-23
map00680 Methane metabolism	0.000773184	2.13	KFZ67_02535	263	K	K01689	ENO, eno; enolase [EC:4.2.1.11]	Enolase OS=Photobacterium damselae OX=38293 GN=eno PE=3 SV=1	eno	2	-1.1276	10	EEGIYDLK(1)GEGK	1	5.62616e-07	100.38	1	1.52967e-06	96.82	1	5.62616e-07
map00680 Methane metabolism	0.000773184	2.13	KFZ67_02535	62	K	K01689	ENO, eno; enolase [EC:4.2.1.11]	Enolase OS=Photobacterium damselae OX=38293 GN=eno PE=3 SV=1	eno	2	-0.40512	5	FLGK(1)GVLK	1	0.00689487	70.552	1	0.0283621	49.097	1	0.00689487
map00680 Methane metabolism	0.000773184	2.13	KFZ67_02535	66	K	K01689	ENO, eno; enolase [EC:4.2.1.11]	Enolase OS=Photobacterium damselae OX=38293 GN=eno PE=3 SV=1	eno	3	0.30804	6	GVLK(1)AVTAVNGPIAEALLGK	1	1.65234e-12	88.176	1	6.02277e-10	74.029	1	1.65234e-12
map00680 Methane metabolism	0.000773184	2.13	KFZ67_02535	358	K	K01689	ENO, eno; enolase [EC:4.2.1.11]	Enolase OS=Photobacterium damselae OX=38293 GN=eno PE=3 SV=1	eno	3	0.29186	3	FNQIGSLTETLAAIK(1)MAK	1	5.20181e-12	93.495	1	5.20181e-12	93.495	1	1.24077e-09
map00680 Methane metabolism	0.000773184	2.13	KFZ67_02535	361	K	K01689	ENO, eno; enolase [EC:4.2.1.11]	Enolase OS=Photobacterium damselae OX=38293 GN=eno PE=3 SV=1	eno	3	-0.37269	7	MAK(1)DAGYTAVISHR	1	2.26609e-32	157.86	1	2.95933e-18	133.48	1	2.26609e-32
map00680 Methane metabolism	0.000773184	2.13	KFZ67_02535	326	K	K01689	ENO, eno; enolase [EC:4.2.1.11]	Enolase OS=Photobacterium damselae OX=38293 GN=eno PE=3 SV=1	eno	3	-0.44436	3	IQLVGDDLFVTNTK(1)ILAEGIEK	1	3.12209e-35	130.89	1	3.12209e-35	130.89	1	2.17598e-21
map00680 Methane metabolism	0.000773184	2.13	KFZ67_02535	312	K	K01689	ENO, eno; enolase [EC:4.2.1.11]	Enolase OS=Photobacterium damselae OX=38293 GN=eno PE=3 SV=1	eno	3	1.3262	5	LLGDK(1)IQLVGDDLFVTNTK	1	2.90195e-22	121.01	1	2.23582e-21	111.6	1	2.90195e-22
map00680 Methane metabolism	0.000773184	2.13	KFZ67_02535	120	K	K01689	ENO, eno; enolase [EC:4.2.1.11]	Enolase OS=Photobacterium damselae OX=38293 GN=eno PE=3 SV=1	eno	3	-0.13408	4	SNFGANAILAVSLANAK(1)AAAAAK	1	1.97278e-35	129.2	1	1.97278e-35	129.2	1	1.65142e-27
map00680 Methane metabolism	0.000773184	2.13	KFZ67_02535	406	K	K01689	ENO, eno; enolase [EC:4.2.1.11]	Enolase OS=Photobacterium damselae OX=38293 GN=eno PE=3 SV=1	eno	2	-0.2721	5	VAK(1)YNQLIR	1	6.97595e-17	138.54	1	8.41821e-17	136.8	1	6.97595e-17
map00680 Methane metabolism	0.000773184	2.13	KFZ67_03890	473	K	K13788	pta; phosphate acetyltransferase [EC:2.3.1.8]	Phosphate acetyltransferase OS=Photobacterium damselae OX=38293 GN=pta PE=3 SV=1	pta	2	-1.4276	2	GAK(1)GMTEVVAR	1	0.000200726	75.416	1	0.000200726	75.416	1	0.00315164
map00680 Methane metabolism	0.000773184	2.13	KFZ67_03890	413	K	K13788	pta; phosphate acetyltransferase [EC:2.3.1.8]	Phosphate acetyltransferase OS=Photobacterium damselae OX=38293 GN=pta PE=3 SV=1	pta	2	-0.46396	3	TVK(1)AAAICAER	1	0.000208333	78.884	1	0.000564993	71.268	1	0.000208333
map00680 Methane metabolism	0.000773184	2.13	KFZ67_03890	33	K	K13788	pta; phosphate acetyltransferase [EC:2.3.1.8]	Phosphate acetyltransferase OS=Photobacterium damselae OX=38293 GN=pta PE=3 SV=1	pta	2	-1.5228	2	VSFFK(1)PIAQPR	1	0.000240294	77.744	1	0.00355096	54.486	1	0.000240294
map00680 Methane metabolism	0.000773184	2.13	KFZ67_03895	292	K	K00925	ackA; acetate kinase [EC:2.7.2.1]	Acetate kinase OS=Photobacterium damselae OX=38293 GN=ackA_1 PE=3 SV=1	ackA_1	2	-1.0422	6	FVEDNYGDK(1)EEATR	1	1.45219e-23	139.86	1	0.000558701	57.288	1	1.45219e-23
map00680 Methane metabolism	0.000773184	2.13	KFZ67_07570	177	K	K00124	fdoH, fdsB; formate dehydrogenase iron-sulfur subunit	4Fe-4S dicluster domain-containing protein OS=Photobacterium damselae OX=38293 GN=fdhB1 PE=4 SV=1	fdhB1	2	0.70839	3	ISEIYSK(1)R	1	1.54022e-32	161.02	1	7.85249e-08	121.09	1	1.54022e-32
map00680 Methane metabolism	0.000773184	2.13	KFZ67_07575	131	K	K00123	fdoG, fdhF, fdwA; formate dehydrogenase major subunit [EC:1.17.1.9]	Formate dehydrogenase OS=Photobacterium damselae OX=38293 GN=fdnG PE=3 SV=1	fdnG	2	0.82363	3	LVNGK(1)WQR	1	4.11816e-11	128.57	1	0.00095075	89.55	1	4.11816e-11
map00680 Methane metabolism	0.000773184	2.13	KFZ67_07575	736	K	K00123	fdoG, fdhF, fdwA; formate dehydrogenase major subunit [EC:1.17.1.9]	Formate dehydrogenase OS=Photobacterium damselae OX=38293 GN=fdnG PE=3 SV=1	fdnG	2	-1.8663	4	NWK(1)TDLSGGIQR	1	1.16524e-13	123.67	1	3.48046e-06	94.402	1	1.16524e-13
map00680 Methane metabolism	0.000773184	2.13	KFZ67_07575	450	K	K00123	fdoG, fdhF, fdwA; formate dehydrogenase major subunit [EC:1.17.1.9]	Formate dehydrogenase OS=Photobacterium damselae OX=38293 GN=fdnG PE=3 SV=1	fdnG	2	-1.3933	8	PMNSK(1)GIPVSR	1	6.92879e-10	120.77	1	6.92879e-10	120.77	1	5.88167e-06
map00680 Methane metabolism	0.000773184	2.13	KFZ67_08060	65	K	K03533	torD; TorA specific chaperone	Chaperone protein TorD OS=Photobacterium damselae subsp. damselae OX=85581 GN=torD_2 PE=3 SV=1	torD_2	2	0.18129	4	AALTK(1)LETR	1	5.93241e-05	102.01	1	5.93241e-05	102.01	1	0.00123372
map00680 Methane metabolism	0.000773184	2.13	KFZ67_08835	349	K	K07811	torA; trimethylamine-N-oxide reductase (cytochrome c) [EC:1.7.2.3]	Trimethylamine N-oxide reductase I catalytic subunit OS=Photobacterium damselae OX=38293 GN=BST98_08850 PE=3 SV=1	BST98_08850	2	-0.30971	3	ADEIQK(1)FAR	1	2.27422e-05	107.06	1	0.00016393	96.229	1	2.27422e-05
map00680 Methane metabolism	0.000773184	2.13	KFZ67_08835	179	K	K07811	torA; trimethylamine-N-oxide reductase (cytochrome c) [EC:1.7.2.3]	Trimethylamine N-oxide reductase I catalytic subunit OS=Photobacterium damselae OX=38293 GN=BST98_08850 PE=3 SV=1	BST98_08850	2	1.3139	2	AVGMYGNFIK(1)K	1	0.000886366	56.548	1	0.000886366	56.548	1	0.000886366
map00680 Methane metabolism	0.000773184	2.13	KFZ67_08835	691	K	K07811	torA; trimethylamine-N-oxide reductase (cytochrome c) [EC:1.7.2.3]	Trimethylamine N-oxide reductase I catalytic subunit OS=Photobacterium damselae OX=38293 GN=BST98_08850 PE=3 SV=1	BST98_08850	3	-2.254	4	SDKYPLWLQSCHPPK(1)R	1	8.94597e-14	104.95	1	1.63515e-06	79.346	1	8.94597e-14
map00680 Methane metabolism	0.000773184	2.13	KFZ67_08840	164	K	K03532	torC; trimethylamine-N-oxide reductase (cytochrome c), cytochrome c-type subunit TorC	Cytochrome c-type protein OS=Photobacterium damselae OX=38293 GN=torC PE=3 SV=1	torC	2	0.5929	3	AQVQMK(1)QAAAR	1	2.89482e-13	123.79	1	4.3238e-09	112.13	1	2.89482e-13
map00680 Methane metabolism	0.000773184	2.13	KFZ67_11120	345	K	K00600	glyA, SHMT; glycine hydroxymethyltransferase [EC:2.1.2.1]	Serine hydroxymethyltransferase OS=Photobacterium damsela subsp. piscicida OX=38294 GN=glyA PE=3 SV=1	glyA	3	-0.038057	4	EADAALGAANITVNK(1)NSVPNDPR	1	6.56601e-45	143.4	1	6.56601e-45	143.4	1	2.16302e-35
map00680 Methane metabolism	0.000773184	2.13	KFZ67_11120	330	K	K00600	glyA, SHMT; glycine hydroxymethyltransferase [EC:2.1.2.1]	Serine hydroxymethyltransferase OS=Photobacterium damsela subsp. piscicida OX=38294 GN=glyA PE=3 SV=1	glyA	3	-0.81801	3	GITGK(1)EADAALGAANITVNK	1	1.61841e-10	82.482	1	1.61841e-10	82.482	1	6.2005e-10
map00680 Methane metabolism	0.000773184	2.13	KFZ67_11120	325	K	K00600	glyA, SHMT; glycine hydroxymethyltransferase [EC:2.1.2.1]	Serine hydroxymethyltransferase OS=Photobacterium damsela subsp. piscicida OX=38294 GN=glyA PE=3 SV=1	glyA	3	-0.2402	3	IVSGSTENHLFLVDLIDK(1)GITGK	1	1.83922e-11	83.826	1	2.09806e-07	69.071	1	1.83922e-11
map00680 Methane metabolism	0.000773184	2.13	KFZ67_11120	410	K	K00600	glyA, SHMT; glycine hydroxymethyltransferase [EC:2.1.2.1]	Serine hydroxymethyltransferase OS=Photobacterium damsela subsp. piscicida OX=38294 GN=glyA PE=3 SV=1	glyA	2	0.7709	4	VLEICK(1)R	1	1.18019e-06	119.57	1	1.18019e-06	119.57	1	0.000192935
map00680 Methane metabolism	0.000773184	2.13	KFZ67_11120	62	K	K00600	glyA, SHMT; glycine hydroxymethyltransferase [EC:2.1.2.1]	Serine hydroxymethyltransferase OS=Photobacterium damsela subsp. piscicida OX=38294 GN=glyA PE=3 SV=1	glyA	2	-0.91322	5	YAEGYPGK(1)R	1	7.58099e-08	120.15	1	1.51613e-07	117.89	1	7.58099e-08
map00680 Methane metabolism	0.000773184	2.13	KFZ67_11160	120	K	K00121	frmA, ADH5, adhC; S-(hydroxymethyl)glutathione dehydrogenase / alcohol dehydrogenase [EC:1.1.1.284 1.1.1.1]	S-(hydroxymethyl)glutathione dehydrogenase OS=Photobacterium damselae OX=38293 GN=frmA PE=3 SV=1	frmA	2	-1.8535	10	ETQGK(1)GLMPDGTTR	1	0.000119643	71.781	1	0.000334127	61.409	1	0.000119643
map00680 Methane metabolism	0.000773184	2.13	KFZ67_11160	323	K	K00121	frmA, ADH5, adhC; S-(hydroxymethyl)glutathione dehydrogenase / alcohol dehydrogenase [EC:1.1.1.284 1.1.1.1]	S-(hydroxymethyl)glutathione dehydrogenase OS=Photobacterium damselae OX=38293 GN=frmA PE=3 SV=1	frmA	2	-0.41474	4	GSAFGGVK(1)GR	1	1.39655e-07	113.67	1	0.000179385	90.15	1	1.39655e-07
map00680 Methane metabolism	0.000773184	2.13	KFZ67_11160	107	K	K00121	frmA, ADH5, adhC; S-(hydroxymethyl)glutathione dehydrogenase / alcohol dehydrogenase [EC:1.1.1.284 1.1.1.1]	S-(hydroxymethyl)glutathione dehydrogenase OS=Photobacterium damselae OX=38293 GN=frmA PE=3 SV=1	frmA	2	0.21654	5	SGK(1)TNLCQAVR	1	3.90278e-27	151.66	1	3.90278e-27	151.66	1	2.3838e-19
map00680 Methane metabolism	0.000773184	2.13	KFZ67_11160	9	K	K00121	frmA, ADH5, adhC; S-(hydroxymethyl)glutathione dehydrogenase / alcohol dehydrogenase [EC:1.1.1.284 1.1.1.1]	S-(hydroxymethyl)glutathione dehydrogenase OS=Photobacterium damselae OX=38293 GN=frmA PE=3 SV=1	frmA	3	-0.30791	5	SK(1)AAVAWGPNQPLSIEEVDVMLPR	1	1.08452e-51	135.76	1	1.57407e-33	121.38	1	1.08452e-51
map00680 Methane metabolism	0.000773184	2.13	KFZ67_12890	142	K	K00024	mdh; malate dehydrogenase [EC:1.1.1.37]	Malate dehydrogenase OS=Photobacterium damselae subsp. damselae OX=85581 GN=mdh PE=3 SV=1	mdh	2	-2.2154	3	K(1)LFGITTLDVIR	1	1.83179e-27	149.23	1	1.83179e-27	149.23	1	4.2682e-20
map00680 Methane metabolism	0.000773184	2.13	KFZ67_12890	162	K	K00024	mdh; malate dehydrogenase [EC:1.1.1.37]	Malate dehydrogenase OS=Photobacterium damselae subsp. damselae OX=85581 GN=mdh PE=3 SV=1	mdh	2	0.97471	3	SETFVAELK(1)GK	1	0.000294285	75.819	1	0.00106502	66.267	1	0.000294285
map00680 Methane metabolism	0.000773184	2.13	KFZ67_12890	21	K	K00024	mdh; malate dehydrogenase [EC:1.1.1.37]	Malate dehydrogenase OS=Photobacterium damselae subsp. damselae OX=85581 GN=mdh PE=3 SV=1	mdh	3	-0.24109	3	VAVIGAAGGIGQALALLLK(1)NR	1	2.19203e-53	148.41	1	2.23028e-27	118.31	1	2.19203e-53
map00680 Methane metabolism	0.000773184	2.13	KFZ67_12920	223	K	K03841	FBP, fbp; fructose-1,6-bisphosphatase I [EC:3.1.3.11]	Fructose-1,6-bisphosphatase class 1 OS=Photobacterium damsela subsp. piscicida OX=38294 GN=fbp PE=3 SV=1	fbp	2	-0.01092	3	FPQGIK(1)QYIK	1	1.92789e-05	104.39	1	9.56732e-05	94.804	1	1.92789e-05
map00680 Methane metabolism	0.000773184	2.13	KFZ67_12920	325	K	K03841	FBP, fbp; fructose-1,6-bisphosphatase I [EC:3.1.3.11]	Fructose-1,6-bisphosphatase class 1 OS=Photobacterium damsela subsp. piscicida OX=38294 GN=fbp PE=3 SV=1	fbp	2	-1.9314	5	NMVK(1)QVEDYLER	1	4.27257e-07	102.73	1	8.51511e-06	88.163	1	4.27257e-07
map00680 Methane metabolism	0.000773184	2.13	KFZ67_12920	33	K	K03841	FBP, fbp; fructose-1,6-bisphosphatase I [EC:3.1.3.11]	Fructose-1,6-bisphosphatase class 1 OS=Photobacterium damsela subsp. piscicida OX=38294 GN=fbp PE=3 SV=1	fbp	3	-2.1513	2	QNDFPHASGELSSLLGSIK(1)LAAK	1	5.65823e-07	61.963	1	5.65823e-07	61.963	1	2.83731e-05
map00680 Methane metabolism	0.000773184	2.13	KFZ67_13575	367	K	K01895	ACSS1_2, acs; acetyl-CoA synthetase [EC:6.2.1.1]	Acetyl-coenzyme A synthetase OS=Photobacterium damselae OX=38293 GN=acs PE=3 SV=1	acs	2	0.10714	16	ALMAK(1)GDEAIVDTSR	1	6.73423e-22	123.76	1	6.73423e-22	123.76	1	1.50243e-18
map00680 Methane metabolism	0.000773184	2.13	KFZ67_13575	640	K	K01895	ACSS1_2, acs; acetyl-CoA synthetase [EC:6.2.1.1]	Acetyl-coenzyme A synthetase OS=Photobacterium damselae OX=38293 GN=acs PE=3 SV=1	acs	3	0.2204	4	IATGDTSNLGDTSTLADPSVVEK(1)LIAEK	1	1.38514e-13	82.942	1	3.60515e-09	65.171	1	1.38514e-13
map00680 Methane metabolism	0.000773184	2.13	KFZ67_13575	645	K	K01895	ACSS1_2, acs; acetyl-CoA synthetase [EC:6.2.1.1]	Acetyl-coenzyme A synthetase OS=Photobacterium damselae OX=38293 GN=acs PE=3 SV=1	acs	2	0.10552	3	LIAEK(1)QQLL	1	0.00442148	61.679	1	0.0138315	49.536	1	0.00442148
map00680 Methane metabolism	0.000773184	2.13	KFZ67_13575	181	K	K01895	ACSS1_2, acs; acetyl-CoA synthetase [EC:6.2.1.1]	Acetyl-coenzyme A synthetase OS=Photobacterium damselae OX=38293 GN=acs PE=3 SV=1	acs	3	-0.031305	6	IIDSNAK(1)VVITADEGVR	1	1.38491e-08	85.421	1	1.38491e-08	85.421	1	7.93262e-08
map00680 Methane metabolism	0.000773184	2.13	KFZ67_13575	585	K	K01895	ACSS1_2, acs; acetyl-CoA synthetase [EC:6.2.1.1]	Acetyl-coenzyme A synthetase OS=Photobacterium damselae OX=38293 GN=acs PE=3 SV=1	acs	3	-0.53717	2	K(1)EIGPIATPDFLHWTDALPK	1	8.15194e-07	64.843	1	8.15194e-07	64.843	1	8.46284e-07
map00680 Methane metabolism	0.000773184	2.13	KFZ67_13575	617	K	K01895	ACSS1_2, acs; acetyl-CoA synthetase [EC:6.2.1.1]	Acetyl-coenzyme A synthetase OS=Photobacterium damselae OX=38293 GN=acs PE=3 SV=1	acs	3	2.0426	14	K(1)IATGDTSNLGDTSTLADPSVVEK	1	1.44189e-32	113.65	1	8.84848e-24	103.92	1	1.44189e-32
map00680 Methane metabolism	0.000773184	2.13	KFZ67_13575	348	K	K01895	ACSS1_2, acs; acetyl-CoA synthetase [EC:6.2.1.1]	Acetyl-coenzyme A synthetase OS=Photobacterium damselae OX=38293 GN=acs PE=3 SV=1	acs	3	1.4901	3	MSQVVDK(1)HQVNILYTAPTAIR	1	2.27558e-10	74.364	1	8.5193e-08	72.167	1	2.27558e-10
map00710 Carbon fixation in photosynthetic organisms	0.000339334	3.23	KFZ67_00840	11	K	K01803	TPI, tpiA; triosephosphate isomerase (TIM) [EC:5.3.1.1]	Triosephosphate isomerase OS=Photobacterium damselae OX=38293 GN=tpiA PE=3 SV=1	tpiA	2	1.236	7	HPVVMGNWK(1)LNGSK	1	4.98702e-13	116.63	1	8.79917e-05	73.415	1	4.98702e-13
map00710 Carbon fixation in photosynthetic organisms	0.000339334	3.23	KFZ67_00945	156	K	K01595	ppc; phosphoenolpyruvate carboxylase [EC:4.1.1.31]	Phosphoenolpyruvate carboxylase OS=Photobacterium damselae OX=38293 GN=ppc PE=3 SV=1	ppc	2	2.0717	3	LVQINK(1)CLSK	1	0.000452132	81.335	1	0.000466514	81.017	1	0.000452132
map00710 Carbon fixation in photosynthetic organisms	0.000339334	3.23	KFZ67_02330	27	K	K00927	PGK, pgk; phosphoglycerate kinase [EC:2.7.2.3]	Phosphoglycerate kinase OS=Photobacterium damsela subsp. piscicida OX=38294 GN=pgk PE=3 SV=1	pgk	2	-0.89737	7	ADLNVPVK(1)DGK	1	0.000824172	68.676	1	0.00127952	64.121	1	0.000824172
map00710 Carbon fixation in photosynthetic organisms	0.000339334	3.23	KFZ67_02330	53	K	K00927	PGK, pgk; phosphoglycerate kinase [EC:2.7.2.3]	Phosphoglycerate kinase OS=Photobacterium damsela subsp. piscicida OX=38294 GN=pgk PE=3 SV=1	pgk	3	-0.76268	3	HCLEAGAK(1)VMVTSHLGR	1	8.61424e-13	103.13	1	3.76371e-06	65.105	1	8.61424e-13
map00710 Carbon fixation in photosynthetic organisms	0.000339334	3.23	KFZ67_02330	374	K	K00927	PGK, pgk; phosphoglycerate kinase [EC:2.7.2.3]	Phosphoglycerate kinase OS=Photobacterium damsela subsp. piscicida OX=38294 GN=pgk PE=3 SV=1	pgk	2	-0.1494	6	K(1)LPAVEMLETR	1	9.57148e-06	92.247	1	9.57148e-06	92.247	1	1.83278e-05
map00710 Carbon fixation in photosynthetic organisms	0.000339334	3.23	KFZ67_02330	14	K	K00927	PGK, pgk; phosphoglycerate kinase [EC:2.7.2.3]	Phosphoglycerate kinase OS=Photobacterium damsela subsp. piscicida OX=38294 GN=pgk PE=3 SV=1	pgk	2	0.018359	19	MTDLDLAGK(1)R	1	2.85585e-45	179.1	1	2.85585e-45	179.1	1	1.47692e-24
map00710 Carbon fixation in photosynthetic organisms	0.000339334	3.23	KFZ67_02330	193	K	K00927	PGK, pgk; phosphoglycerate kinase [EC:2.7.2.3]	Phosphoglycerate kinase OS=Photobacterium damsela subsp. piscicida OX=38294 GN=pgk PE=3 SV=1	pgk	2	4.0599	5	PMVAIVGGSK(1)VSTK	1	2.20557e-05	82.651	1	2.20557e-05	82.651	1	8.49995e-05
map00710 Carbon fixation in photosynthetic organisms	0.000339334	3.23	KFZ67_02330	197	K	K00927	PGK, pgk; phosphoglycerate kinase [EC:2.7.2.3]	Phosphoglycerate kinase OS=Photobacterium damsela subsp. piscicida OX=38294 GN=pgk PE=3 SV=1	pgk	2	-1.0685	3	VSTK(1)LTVLESLSK	1	0.000130554	77.204	1	0.0004135	68.044	1	0.000130554
map00710 Carbon fixation in photosynthetic organisms	0.000339334	3.23	KFZ67_02330	5	K	K00927	PGK, pgk; phosphoglycerate kinase [EC:2.7.2.3]	Phosphoglycerate kinase OS=Photobacterium damsela subsp. piscicida OX=38294 GN=pgk PE=3 SV=1	pgk	2	1.8353	13	SVIK(1)MTDLDLAGK	1	0.000249755	71.879	1	0.000249755	71.879	1	0.000265057
map00710 Carbon fixation in photosynthetic organisms	0.000339334	3.23	KFZ67_02335	72	K	K01624	FBA, fbaA; fructose-bisphosphate aldolase, class II [EC:4.1.2.13]	Fructose-bisphosphate aldolase OS=Photobacterium damselae OX=38293 GN=fbaA PE=3 SV=1	fbaA	3	2.129	2	APVIVQFSNGGAAFFAGK(1)GLK	1	9.91832e-36	133.94	1	3.94466e-35	131.67	1	9.91832e-36
map00710 Carbon fixation in photosynthetic organisms	0.000339334	3.23	KFZ67_02335	75	K	K01624	FBA, fbaA; fructose-bisphosphate aldolase, class II [EC:4.1.2.13]	Fructose-bisphosphate aldolase OS=Photobacterium damselae OX=38293 GN=fbaA PE=3 SV=1	fbaA	2	1.6554	6	GLK(1)LEGQEAQIK	1	8.87281e-06	87.719	1	0.00424577	63.091	1	8.87281e-06
map00710 Carbon fixation in photosynthetic organisms	0.000339334	3.23	KFZ67_02335	29	K	K01624	FBA, fbaA; fructose-bisphosphate aldolase, class II [EC:4.1.2.13]	Fructose-bisphosphate aldolase OS=Photobacterium damselae OX=38293 GN=fbaA PE=3 SV=1	fbaA	3	-1.3666	2	ENK(1)FALPAVNVVNTDTINGVLEAAAK	1	1.71893e-11	80.02	1	1.71893e-11	80.02	1	1.01532e-07
map00710 Carbon fixation in photosynthetic organisms	0.000339334	3.23	KFZ67_02335	325	K	K01624	FBA, fbaA; fructose-bisphosphate aldolase, class II [EC:4.1.2.13]	Fructose-bisphosphate aldolase OS=Photobacterium damselae OX=38293 GN=fbaA PE=3 SV=1	fbaA	3	-0.39934	10	KFEAENHDYLQGQIGNPTGPDAPNK(1)K	1	1.11269e-42	130.98	1	9.16463e-33	114.75	1	1.11269e-42
map00710 Carbon fixation in photosynthetic organisms	0.000339334	3.23	KFZ67_02335	84	K	K01624	FBA, fbaA; fructose-bisphosphate aldolase, class II [EC:4.1.2.13]	Fructose-bisphosphate aldolase OS=Photobacterium damselae OX=38293 GN=fbaA PE=3 SV=1	fbaA	2	0.40311	5	LEGQEAQIK(1)GAVAGAK	1	9.57618e-09	94.487	1	9.57618e-09	94.487	1	2.26457e-08
map00710 Carbon fixation in photosynthetic organisms	0.000339334	3.23	KFZ67_02335	20	K	K01624	FBA, fbaA; fructose-bisphosphate aldolase, class II [EC:4.1.2.13]	Fructose-bisphosphate aldolase OS=Photobacterium damselae OX=38293 GN=fbaA PE=3 SV=1	fbaA	3	0.52701	5	IFDFVKPGVISGDDVQK(1)VFEVAK	1	4.81435e-22	107.21	0.999677	5.6263e-07	64.749	1	4.81435e-22
map00710 Carbon fixation in photosynthetic organisms	0.000339334	3.23	KFZ67_02335	26	K	K01624	FBA, fbaA; fructose-bisphosphate aldolase, class II [EC:4.1.2.13]	Fructose-bisphosphate aldolase OS=Photobacterium damselae OX=38293 GN=fbaA PE=3 SV=1	fbaA	2	1.0733	6	VFEVAK(1)ENK	1	1.00106e-07	119.75	1	1.00106e-07	119.75	1	3.84516e-05
map00710 Carbon fixation in photosynthetic organisms	0.000339334	3.23	KFZ67_02335	301	K	K01624	FBA, fbaA; fructose-bisphosphate aldolase, class II [EC:4.1.2.13]	Fructose-bisphosphate aldolase OS=Photobacterium damselae OX=38293 GN=fbaA PE=3 SV=1	fbaA	3	0.21001	8	K(1)FEAENHDYLQGQIGNPTGPDAPNK	1	2.10236e-16	86.18	1	1.18301e-07	69.284	1	2.10236e-16
map00710 Carbon fixation in photosynthetic organisms	0.000339334	3.23	KFZ67_02335	113	K	K01624	FBA, fbaA; fructose-bisphosphate aldolase, class II [EC:4.1.2.13]	Fructose-bisphosphate aldolase OS=Photobacterium damselae OX=38293 GN=fbaA PE=3 SV=1	fbaA	5	-0.76607	13	YVHAIAETYGVPVILHTDHAAK(1)K	1	1.63571e-44	136.49	1	3.60001e-35	122.94	1	1.63571e-44
map00710 Carbon fixation in photosynthetic organisms	0.000339334	3.23	KFZ67_02360	8	K	K01807	rpiA; ribose 5-phosphate isomerase A [EC:5.3.1.6]	Ribose-5-phosphate isomerase A OS=Photobacterium damselae OX=38293 GN=rpiA PE=3 SV=1	rpiA	2	0.91171	3	K(1)AAGWAALEYVK	1	0.00172073	56.569	1	0.00289524	49.269	1	0.00172073
map00710 Carbon fixation in photosynthetic organisms	0.000339334	3.23	KFZ67_04535	261	K	K00134	GAPDH, gapA; glyceraldehyde 3-phosphate dehydrogenase [EC:1.2.1.12]	Glyceraldehyde-3-phosphate dehydrogenase OS=Photobacterium damselae OX=38293 GN=BST98_04565 PE=3 SV=1	BST98_04565	2	0.63932	5	AMK(1)DASEGSLK	1	8.3041e-07	101.39	1	8.3041e-07	101.39	1	1.17696e-06
map00710 Carbon fixation in photosynthetic organisms	0.000339334	3.23	KFZ67_04535	269	K	K00134	GAPDH, gapA; glyceraldehyde 3-phosphate dehydrogenase [EC:1.2.1.12]	Glyceraldehyde-3-phosphate dehydrogenase OS=Photobacterium damselae OX=38293 GN=BST98_04565 PE=3 SV=1	BST98_04565	3	-1.3297	6	DASEGSLK(1)GILGYTEDAVVSTDFNGDTR	1	3.40921e-46	123.19	1	3.40921e-46	123.19	1	1.64781e-19
map00710 Carbon fixation in photosynthetic organisms	0.000339334	3.23	KFZ67_04535	225	K	K00134	GAPDH, gapA; glyceraldehyde 3-phosphate dehydrogenase [EC:1.2.1.12]	Glyceraldehyde-3-phosphate dehydrogenase OS=Photobacterium damselae OX=38293 GN=BST98_04565 PE=3 SV=1	BST98_04565	3	-1.2794	3	AVGVVLPEVNGK(1)LTGMAFR	1	4.58562e-52	144.15	1	1.80574e-36	144.15	1	4.58562e-52
map00710 Carbon fixation in photosynthetic organisms	0.000339334	3.23	KFZ67_04535	70	K	K00134	GAPDH, gapA; glyceraldehyde 3-phosphate dehydrogenase [EC:1.2.1.12]	Glyceraldehyde-3-phosphate dehydrogenase OS=Photobacterium damselae OX=38293 GN=BST98_04565 PE=3 SV=1	BST98_04565	3	1.451	5	FNGTVEVEGGNLIVNGK(1)TVR	1	6.36502e-22	110.33	1	6.36502e-22	110.33	1	1.6887e-12
map00710 Carbon fixation in photosynthetic organisms	0.000339334	3.23	KFZ67_04535	258	K	K00134	GAPDH, gapA; glyceraldehyde 3-phosphate dehydrogenase [EC:1.2.1.12]	Glyceraldehyde-3-phosphate dehydrogenase OS=Photobacterium damselae OX=38293 GN=BST98_04565 PE=3 SV=1	BST98_04565	2	-0.93259	7	NGASYETICK(1)AMK	1	2.37952e-06	88.101	1	0.000101745	79.089	1	2.37952e-06
map00710 Carbon fixation in photosynthetic organisms	0.000339334	3.23	KFZ67_04535	4	K	K00134	GAPDH, gapA; glyceraldehyde 3-phosphate dehydrogenase [EC:1.2.1.12]	Glyceraldehyde-3-phosphate dehydrogenase OS=Photobacterium damselae OX=38293 GN=BST98_04565 PE=3 SV=1	BST98_04565	2	1.2903	3	TIK(1)VGINGFGR	1	2.28342e-05	97.472	1	9.04359e-05	93.096	1	2.28342e-05
map00710 Carbon fixation in photosynthetic organisms	0.000339334	3.23	KFZ67_04535	192	K	K00134	GAPDH, gapA; glyceraldehyde 3-phosphate dehydrogenase [EC:1.2.1.12]	Glyceraldehyde-3-phosphate dehydrogenase OS=Photobacterium damselae OX=38293 GN=BST98_04565 PE=3 SV=1	BST98_04565	2	-0.48363	5	TVDGPSAK(1)DWR	1	1.02847e-60	189.58	1	1.02847e-60	189.58	1	6.9966e-48
map00710 Carbon fixation in photosynthetic organisms	0.000339334	3.23	KFZ67_04535	184	K	K00134	GAPDH, gapA; glyceraldehyde 3-phosphate dehydrogenase [EC:1.2.1.12]	Glyceraldehyde-3-phosphate dehydrogenase OS=Photobacterium damselae OX=38293 GN=BST98_04565 PE=3 SV=1	BST98_04565	3	-0.80049	11	VLNDNFGIESGLMTTVHATTATQK(1)TVDGPSAK	1	3.62959e-14	79.917	1	3.71691e-14	79.782	1	3.62959e-14
map00710 Carbon fixation in photosynthetic organisms	0.000339334	3.23	KFZ67_12890	142	K	K00024	mdh; malate dehydrogenase [EC:1.1.1.37]	Malate dehydrogenase OS=Photobacterium damselae subsp. damselae OX=85581 GN=mdh PE=3 SV=1	mdh	2	-2.2154	3	K(1)LFGITTLDVIR	1	1.83179e-27	149.23	1	1.83179e-27	149.23	1	4.2682e-20
map00710 Carbon fixation in photosynthetic organisms	0.000339334	3.23	KFZ67_12890	162	K	K00024	mdh; malate dehydrogenase [EC:1.1.1.37]	Malate dehydrogenase OS=Photobacterium damselae subsp. damselae OX=85581 GN=mdh PE=3 SV=1	mdh	2	0.97471	3	SETFVAELK(1)GK	1	0.000294285	75.819	1	0.00106502	66.267	1	0.000294285
map00710 Carbon fixation in photosynthetic organisms	0.000339334	3.23	KFZ67_12890	21	K	K00024	mdh; malate dehydrogenase [EC:1.1.1.37]	Malate dehydrogenase OS=Photobacterium damselae subsp. damselae OX=85581 GN=mdh PE=3 SV=1	mdh	3	-0.24109	3	VAVIGAAGGIGQALALLLK(1)NR	1	2.19203e-53	148.41	1	2.23028e-27	118.31	1	2.19203e-53
map00710 Carbon fixation in photosynthetic organisms	0.000339334	3.23	KFZ67_12920	223	K	K03841	FBP, fbp; fructose-1,6-bisphosphatase I [EC:3.1.3.11]	Fructose-1,6-bisphosphatase class 1 OS=Photobacterium damsela subsp. piscicida OX=38294 GN=fbp PE=3 SV=1	fbp	2	-0.01092	3	FPQGIK(1)QYIK	1	1.92789e-05	104.39	1	9.56732e-05	94.804	1	1.92789e-05
map00710 Carbon fixation in photosynthetic organisms	0.000339334	3.23	KFZ67_12920	325	K	K03841	FBP, fbp; fructose-1,6-bisphosphatase I [EC:3.1.3.11]	Fructose-1,6-bisphosphatase class 1 OS=Photobacterium damsela subsp. piscicida OX=38294 GN=fbp PE=3 SV=1	fbp	2	-1.9314	5	NMVK(1)QVEDYLER	1	4.27257e-07	102.73	1	8.51511e-06	88.163	1	4.27257e-07
map00710 Carbon fixation in photosynthetic organisms	0.000339334	3.23	KFZ67_12920	33	K	K03841	FBP, fbp; fructose-1,6-bisphosphatase I [EC:3.1.3.11]	Fructose-1,6-bisphosphatase class 1 OS=Photobacterium damsela subsp. piscicida OX=38294 GN=fbp PE=3 SV=1	fbp	3	-2.1513	2	QNDFPHASGELSSLLGSIK(1)LAAK	1	5.65823e-07	61.963	1	5.65823e-07	61.963	1	2.83731e-05
map00710 Carbon fixation in photosynthetic organisms	0.000339334	3.23	KFZ67_17960	243	K	K00615	E2.2.1.1, tktA, tktB; transketolase [EC:2.2.1.1]	Transketolase OS=Photobacterium damselae OX=38293 GN=tkt PE=3 SV=1	tkt	3	-0.54468	4	ADTTRPTLICCK(1)TIIGFGSPNK	1	1.47338e-10	67.895	1	1.47338e-10	65.833	1	4.51088e-07
map00720 Carbon fixation pathways in prokaryotes	0.000110219	2.6	KFZ67_00945	156	K	K01595	ppc; phosphoenolpyruvate carboxylase [EC:4.1.1.31]	Phosphoenolpyruvate carboxylase OS=Photobacterium damselae OX=38293 GN=ppc PE=3 SV=1	ppc	2	2.0717	3	LVQINK(1)CLSK	1	0.000452132	81.335	1	0.000466514	81.017	1	0.000452132
map00720 Carbon fixation pathways in prokaryotes	0.000110219	2.6	KFZ67_02005	387	K	K01682	acnB; aconitate hydratase 2 / 2-methylisocitrate dehydratase [EC:4.2.1.3 4.2.1.99]	Aconitate hydratase B OS=Photobacterium damselae subsp. damselae OX=85581 GN=acnB PE=3 SV=1	acnB	2	2.1684	6	GYTLAQK(1)MVGK	1	0.000309863	72.2	1	0.000309863	72.2	1	0.000468429
map00720 Carbon fixation pathways in prokaryotes	0.000110219	2.6	KFZ67_03145	136	K	K01962	accA; acetyl-CoA carboxylase carboxyl transferase subunit alpha [EC:6.4.1.2 2.1.3.15]	Acetyl-coenzyme A carboxylase carboxyl transferase subunit alpha OS=Photobacterium damselae subsp. damselae OX=85581 GN=accA PE=3 SV=1	accA	2	-0.23154	2	NFGMPK(1)PEGYR	1	0.000148501	81.017	1	0.000148501	81.017	1	0.000991815
map00720 Carbon fixation pathways in prokaryotes	0.000110219	2.6	KFZ67_03890	473	K	K13788	pta; phosphate acetyltransferase [EC:2.3.1.8]	Phosphate acetyltransferase OS=Photobacterium damselae OX=38293 GN=pta PE=3 SV=1	pta	2	-1.4276	2	GAK(1)GMTEVVAR	1	0.000200726	75.416	1	0.000200726	75.416	1	0.00315164
map00720 Carbon fixation pathways in prokaryotes	0.000110219	2.6	KFZ67_03890	413	K	K13788	pta; phosphate acetyltransferase [EC:2.3.1.8]	Phosphate acetyltransferase OS=Photobacterium damselae OX=38293 GN=pta PE=3 SV=1	pta	2	-0.46396	3	TVK(1)AAAICAER	1	0.000208333	78.884	1	0.000564993	71.268	1	0.000208333
map00720 Carbon fixation pathways in prokaryotes	0.000110219	2.6	KFZ67_03890	33	K	K13788	pta; phosphate acetyltransferase [EC:2.3.1.8]	Phosphate acetyltransferase OS=Photobacterium damselae OX=38293 GN=pta PE=3 SV=1	pta	2	-1.5228	2	VSFFK(1)PIAQPR	1	0.000240294	77.744	1	0.00355096	54.486	1	0.000240294
map00720 Carbon fixation pathways in prokaryotes	0.000110219	2.6	KFZ67_03895	292	K	K00925	ackA; acetate kinase [EC:2.7.2.1]	Acetate kinase OS=Photobacterium damselae OX=38293 GN=ackA_1 PE=3 SV=1	ackA_1	2	-1.0422	6	FVEDNYGDK(1)EEATR	1	1.45219e-23	139.86	1	0.000558701	57.288	1	1.45219e-23
map00720 Carbon fixation pathways in prokaryotes	0.000110219	2.6	KFZ67_04275	10	K	K01963	accD; acetyl-CoA carboxylase carboxyl transferase subunit beta [EC:6.4.1.2 2.1.3.15]	Acetyl-coenzyme A carboxylase carboxyl transferase subunit beta OS=Photobacterium damselae subsp. damselae OX=85581 GN=accD PE=3 SV=1	accD	2	0.1021	3	ILTK(1)SNIVTSR	1	1.12446e-09	119.74	1	9.70305e-07	103.43	1	1.12446e-09
map00720 Carbon fixation pathways in prokaryotes	0.000110219	2.6	KFZ67_04945	236	K	K00031	IDH1, IDH2, icd; isocitrate dehydrogenase [EC:1.1.1.42]	Isocitrate dehydrogenase [NADP] OS=Photobacterium damselae OX=38293 GN=icd PE=4 SV=1	icd	2	-0.79941	7	GNIMK(1)FTEGAFK	1	7.7128e-05	82.505	1	0.000119746	80.555	1	7.7128e-05
map00720 Carbon fixation pathways in prokaryotes	0.000110219	2.6	KFZ67_04945	4	K	K00031	IDH1, IDH2, icd; isocitrate dehydrogenase [EC:1.1.1.42]	Isocitrate dehydrogenase [NADP] OS=Photobacterium damselae OX=38293 GN=icd PE=4 SV=1	icd	2	-1.5528	15	MDSK(1)VVVPVDGQK	1	5.06566e-07	94.688	1	2.3644e-06	88.163	1	5.06566e-07
map00720 Carbon fixation pathways in prokaryotes	0.000110219	2.6	KFZ67_04945	274	K	K00031	IDH1, IDH2, icd; isocitrate dehydrogenase [EC:1.1.1.42]	Isocitrate dehydrogenase [NADP] OS=Photobacterium damselae OX=38293 GN=icd PE=4 SV=1	icd	2	0.61097	3	NPNTGK(1)EIVVK	1	5.63111e-07	106.26	1	5.63111e-07	106.26	1	3.40291e-06
map00720 Carbon fixation pathways in prokaryotes	0.000110219	2.6	KFZ67_04945	56	K	K00031	IDH1, IDH2, icd; isocitrate dehydrogenase [EC:1.1.1.42]	Isocitrate dehydrogenase [NADP] OS=Photobacterium damselae OX=38293 GN=icd PE=4 SV=1	icd	2	0.5647	13	VVDAAVQK(1)AYGGDR	1	2.15272e-17	128.22	1	1.91715e-10	107.74	1	2.15272e-17
map00720 Carbon fixation pathways in prokaryotes	0.000110219	2.6	KFZ67_04945	351	K	K00031	IDH1, IDH2, icd; isocitrate dehydrogenase [EC:1.1.1.42]	Isocitrate dehydrogenase [NADP] OS=Photobacterium damselae OX=38293 GN=icd PE=4 SV=1	icd	3	0.2696	3	YAGQDK(1)VNPGSLILSAEMMLR	1	9.1815e-28	120.73	1	9.1815e-28	120.73	1	1.16609e-17
map00720 Carbon fixation pathways in prokaryotes	0.000110219	2.6	KFZ67_09505	28	K	K00626	E2.3.1.9, atoB; acetyl-CoA C-acetyltransferase [EC:2.3.1.9]	Acetyl-CoA C-acetyltransferase OS=Photobacterium damselae OX=38293 GN=CTM90_05090 PE=3 SV=1	CTM90_05090	2	-0.19634	3	DQAAGK(1)IAAEVIK	1	0.00072526	60.861	1	0.000903038	58.885	1	0.00072526
map00720 Carbon fixation pathways in prokaryotes	0.000110219	2.6	KFZ67_09505	345	K	K00626	E2.3.1.9, atoB; acetyl-CoA C-acetyltransferase [EC:2.3.1.9]	Acetyl-CoA C-acetyltransferase OS=Photobacterium damselae OX=38293 GN=CTM90_05090 PE=3 SV=1	CTM90_05090	4	1.9422	4	HQVEASDIIAK(1)ANLNGGAIALGHPLGASGNR	1	4.73063e-14	82.91	1	1.28533e-13	78.383	1	4.73063e-14
map00720 Carbon fixation pathways in prokaryotes	0.000110219	2.6	KFZ67_09505	10	K	K00626	E2.3.1.9, atoB; acetyl-CoA C-acetyltransferase [EC:2.3.1.9]	Acetyl-CoA C-acetyltransferase OS=Photobacterium damselae OX=38293 GN=CTM90_05090 PE=3 SV=1	CTM90_05090	2	0.69125	6	VFIVAAK(1)R	1	7.27634e-17	143	1	3.68027e-11	128.57	1	7.27634e-17
map00720 Carbon fixation pathways in prokaryotes	0.000110219	2.6	KFZ67_09945	262	K	K01902	sucD; succinyl-CoA synthetase alpha subunit [EC:6.2.1.5]	Succinate--CoA ligase [ADP-forming] subunit alpha OS=Photobacterium damselae subsp. damselae OX=85581 GN=sucD PE=3 SV=1	sucD	2	2.396	4	GTAEDK(1)FAALEAAGVR	1	7.66738e-06	70.451	1	1.19744e-05	67.646	1	7.66738e-06
map00720 Carbon fixation pathways in prokaryotes	0.000110219	2.6	KFZ67_09945	243	K	K01902	sucD; succinyl-CoA synthetase alpha subunit [EC:6.2.1.5]	Succinate--CoA ligase [ADP-forming] subunit alpha OS=Photobacterium damselae subsp. damselae OX=85581 GN=sucD PE=3 SV=1	sucD	3	0.028747	4	PVVSYIAGVTAPPGK(1)R	1	2.43283e-05	59.864	1	2.43283e-05	59.864	1	5.41189e-05
map00720 Carbon fixation pathways in prokaryotes	0.000110219	2.6	KFZ67_09945	228	K	K01902	sucD; succinyl-CoA synthetase alpha subunit [EC:6.2.1.5]	Succinate--CoA ligase [ADP-forming] subunit alpha OS=Photobacterium damselae subsp. damselae OX=85581 GN=sucD PE=3 SV=1	sucD	3	-0.51358	4	QHVTK(1)PVVSYIAGVTAPPGK	1	5.05431e-22	112.82	1	5.05431e-22	112.82	1	6.34281e-22
map00720 Carbon fixation pathways in prokaryotes	0.000110219	2.6	KFZ67_09945	7	K	K01902	sucD; succinyl-CoA synthetase alpha subunit [EC:6.2.1.5]	Succinate--CoA ligase [ADP-forming] subunit alpha OS=Photobacterium damselae subsp. damselae OX=85581 GN=sucD PE=3 SV=1	sucD	2	0.6527	3	SILINK(1)DTK	1	1.02589e-07	119.68	1	1.02589e-07	119.68	1	1.02589e-07
map00720 Carbon fixation pathways in prokaryotes	0.000110219	2.6	KFZ67_09950	380	K	K01903	sucC; succinyl-CoA synthetase beta subunit [EC:6.2.1.5]	Succinate--CoA ligase [ADP-forming] subunit beta OS=Photobacterium damselae OX=38293 GN=sucC PE=3 SV=1	sucC	3	-1.4071	3	LAESGLNIIAATSLTEAAEK(1)VVQAAEGK	1	3.00553e-35	111.4	1	3.00553e-35	111.4	1	2.43255e-26
map00720 Carbon fixation pathways in prokaryotes	0.000110219	2.6	KFZ67_09950	79	K	K01903	sucC; succinyl-CoA synthetase beta subunit [EC:6.2.1.5]	Succinate--CoA ligase [ADP-forming] subunit beta OS=Photobacterium damselae OX=38293 GN=sucC PE=3 SV=1	sucC	3	-0.12504	5	TFSQQWLGK(1)HLVTYQTDANGQPVSK	1	1.0675e-23	98.918	1	1.0675e-23	98.918	1	3.55625e-11
map00720 Carbon fixation pathways in prokaryotes	0.000110219	2.6	KFZ67_09970	267	K	K00239	sdhA, frdA; succinate dehydrogenase / fumarate reductase, flavoprotein subunit [EC:1.3.5.1 1.3.5.4]	Succinate dehydrogenase flavoprotein subunit OS=Photobacterium damselae OX=38293 GN=sdhA PE=3 SV=1	sdhA	2	-0.44072	3	GEGGYLLNK(1)DGER	1	0.00126184	54.898	1	0.00177311	49.216	1	0.00126184
map00720 Carbon fixation pathways in prokaryotes	0.000110219	2.6	KFZ67_09970	320	K	K00239	sdhA, frdA; succinate dehydrogenase / fumarate reductase, flavoprotein subunit [EC:1.3.5.1 1.3.5.4]	Succinate dehydrogenase flavoprotein subunit OS=Photobacterium damselae OX=38293 GN=sdhA PE=3 SV=1	sdhA	2	1.5562	3	LDHLGK(1)EVLESR	1	6.18548e-05	83.204	1	6.18548e-05	83.204	1	0.00015781
map00720 Carbon fixation pathways in prokaryotes	0.000110219	2.6	KFZ67_09970	124	K	K00239	sdhA, frdA; succinate dehydrogenase / fumarate reductase, flavoprotein subunit [EC:1.3.5.1 1.3.5.4]	Succinate dehydrogenase flavoprotein subunit OS=Photobacterium damselae OX=38293 GN=sdhA PE=3 SV=1	sdhA	2	0.056288	3	PFGGQSK(1)EFGGEQAAR	1	2.13975e-08	90.348	1	8.05754e-06	70.197	1	2.13975e-08
map00720 Carbon fixation pathways in prokaryotes	0.000110219	2.6	KFZ67_09970	281	K	K00239	sdhA, frdA; succinate dehydrogenase / fumarate reductase, flavoprotein subunit [EC:1.3.5.1 1.3.5.4]	Succinate dehydrogenase flavoprotein subunit OS=Photobacterium damselae OX=38293 GN=sdhA PE=3 SV=1	sdhA	2	-1.3261	3	YAPNAK(1)DLAGR	1	0.00210855	59.265	1	0.00210855	59.265	1	0.00361625
map00720 Carbon fixation pathways in prokaryotes	0.000110219	2.6	KFZ67_12890	142	K	K00024	mdh; malate dehydrogenase [EC:1.1.1.37]	Malate dehydrogenase OS=Photobacterium damselae subsp. damselae OX=85581 GN=mdh PE=3 SV=1	mdh	2	-2.2154	3	K(1)LFGITTLDVIR	1	1.83179e-27	149.23	1	1.83179e-27	149.23	1	4.2682e-20
map00720 Carbon fixation pathways in prokaryotes	0.000110219	2.6	KFZ67_12890	162	K	K00024	mdh; malate dehydrogenase [EC:1.1.1.37]	Malate dehydrogenase OS=Photobacterium damselae subsp. damselae OX=85581 GN=mdh PE=3 SV=1	mdh	2	0.97471	3	SETFVAELK(1)GK	1	0.000294285	75.819	1	0.00106502	66.267	1	0.000294285
map00720 Carbon fixation pathways in prokaryotes	0.000110219	2.6	KFZ67_12890	21	K	K00024	mdh; malate dehydrogenase [EC:1.1.1.37]	Malate dehydrogenase OS=Photobacterium damselae subsp. damselae OX=85581 GN=mdh PE=3 SV=1	mdh	3	-0.24109	3	VAVIGAAGGIGQALALLLK(1)NR	1	2.19203e-53	148.41	1	2.23028e-27	118.31	1	2.19203e-53
map00720 Carbon fixation pathways in prokaryotes	0.000110219	2.6	KFZ67_13470	258	K	K00244	frdA; fumarate reductase flavoprotein subunit [EC:1.3.5.4]	Fumarate reductase flavoprotein subunit OS=Photobacterium damselae OX=38293 GN=CTM90_17535 PE=3 SV=1	CTM90_17535	2	-1.6945	6	GEGGIIVNK(1)NGYR	1	2.09353e-12	111.52	1	0.00033581	72.29	1	2.09353e-12
map00720 Carbon fixation pathways in prokaryotes	0.000110219	2.6	KFZ67_13470	591	K	K00244	frdA; fumarate reductase flavoprotein subunit [EC:1.3.5.4]	Fumarate reductase flavoprotein subunit OS=Photobacterium damselae OX=38293 GN=CTM90_17535 PE=3 SV=1	CTM90_17535	3	0.13956	2	LYGAAAEEAAAK(1)EAAEQQEK	1	3.54712e-10	78.78	1	3.41824e-07	69.422	1	3.54712e-10
map00720 Carbon fixation pathways in prokaryotes	0.000110219	2.6	KFZ67_13575	367	K	K01895	ACSS1_2, acs; acetyl-CoA synthetase [EC:6.2.1.1]	Acetyl-coenzyme A synthetase OS=Photobacterium damselae OX=38293 GN=acs PE=3 SV=1	acs	2	0.10714	16	ALMAK(1)GDEAIVDTSR	1	6.73423e-22	123.76	1	6.73423e-22	123.76	1	1.50243e-18
map00720 Carbon fixation pathways in prokaryotes	0.000110219	2.6	KFZ67_13575	640	K	K01895	ACSS1_2, acs; acetyl-CoA synthetase [EC:6.2.1.1]	Acetyl-coenzyme A synthetase OS=Photobacterium damselae OX=38293 GN=acs PE=3 SV=1	acs	3	0.2204	4	IATGDTSNLGDTSTLADPSVVEK(1)LIAEK	1	1.38514e-13	82.942	1	3.60515e-09	65.171	1	1.38514e-13
map00720 Carbon fixation pathways in prokaryotes	0.000110219	2.6	KFZ67_13575	645	K	K01895	ACSS1_2, acs; acetyl-CoA synthetase [EC:6.2.1.1]	Acetyl-coenzyme A synthetase OS=Photobacterium damselae OX=38293 GN=acs PE=3 SV=1	acs	2	0.10552	3	LIAEK(1)QQLL	1	0.00442148	61.679	1	0.0138315	49.536	1	0.00442148
map00720 Carbon fixation pathways in prokaryotes	0.000110219	2.6	KFZ67_13575	181	K	K01895	ACSS1_2, acs; acetyl-CoA synthetase [EC:6.2.1.1]	Acetyl-coenzyme A synthetase OS=Photobacterium damselae OX=38293 GN=acs PE=3 SV=1	acs	3	-0.031305	6	IIDSNAK(1)VVITADEGVR	1	1.38491e-08	85.421	1	1.38491e-08	85.421	1	7.93262e-08
map00720 Carbon fixation pathways in prokaryotes	0.000110219	2.6	KFZ67_13575	585	K	K01895	ACSS1_2, acs; acetyl-CoA synthetase [EC:6.2.1.1]	Acetyl-coenzyme A synthetase OS=Photobacterium damselae OX=38293 GN=acs PE=3 SV=1	acs	3	-0.53717	2	K(1)EIGPIATPDFLHWTDALPK	1	8.15194e-07	64.843	1	8.15194e-07	64.843	1	8.46284e-07
map00720 Carbon fixation pathways in prokaryotes	0.000110219	2.6	KFZ67_13575	617	K	K01895	ACSS1_2, acs; acetyl-CoA synthetase [EC:6.2.1.1]	Acetyl-coenzyme A synthetase OS=Photobacterium damselae OX=38293 GN=acs PE=3 SV=1	acs	3	2.0426	14	K(1)IATGDTSNLGDTSTLADPSVVEK	1	1.44189e-32	113.65	1	8.84848e-24	103.92	1	1.44189e-32
map00720 Carbon fixation pathways in prokaryotes	0.000110219	2.6	KFZ67_13575	348	K	K01895	ACSS1_2, acs; acetyl-CoA synthetase [EC:6.2.1.1]	Acetyl-coenzyme A synthetase OS=Photobacterium damselae OX=38293 GN=acs PE=3 SV=1	acs	3	1.4901	3	MSQVVDK(1)HQVNILYTAPTAIR	1	2.27558e-10	74.364	1	8.5193e-08	72.167	1	2.27558e-10
map00720 Carbon fixation pathways in prokaryotes	0.000110219	2.6	KFZ67_15635	179	K	K01679	E4.2.1.2B, fumC, FH; fumarate hydratase, class II [EC:4.2.1.2]	Fumarate hydratase class II OS=Photobacterium damselae OX=38293 GN=aspA PE=3 SV=1	aspA	3	-0.39316	2	AIGHIVK(1)TGR	1	0.00190143	60.167	1	0.00345384	55.806	1	0.00190143
map00740 Riboflavin metabolism	0.562108	1.12	KFZ67_11095	39	K	K00794	ribH, RIB4; 6,7-dimethyl-8-ribityllumazine synthase [EC:2.5.1.78]	6,7-dimethyl-8-ribityllumazine synthase OS=Photobacterium damsela subsp. piscicida OX=38294 GN=ribE PE=3 SV=1	ribE	3	0.96926	2	FNSFINESLLSGALDALK(1)R	1	6.759e-07	66.606	1	2.44217e-05	58.024	1	6.759e-07
map00740 Riboflavin metabolism	0.562108	1.12	KFZ67_11095	2	K	K00794	ribH, RIB4; 6,7-dimethyl-8-ribityllumazine synthase [EC:2.5.1.78]	6,7-dimethyl-8-ribityllumazine synthase OS=Photobacterium damsela subsp. piscicida OX=38294 GN=ribE PE=3 SV=1	ribE	2	0.58833	4	MK(1)VIEGAIAAPNAK	1	7.24727e-05	75.589	1	0.000746027	54.09	1	7.24727e-05
map00740 Riboflavin metabolism	0.562108	1.12	KFZ67_11100	184	K	K14652	ribBA; 3,4-dihydroxy 2-butanone 4-phosphate synthase / GTP cyclohydrolase II [EC:4.1.99.12 3.5.4.25]	3,4-dihydroxy-2-butanone 4-phosphate synthase OS=Photobacterium damselae subsp. damselae OX=85581 GN=ribB PE=3 SV=1	ribB	3	-0.20264	3	RPQLEVFAEK(1)HGLK	1	2.8285e-10	106.42	1	4.69149e-07	93.478	1	2.8285e-10
map00750 Vitamin B6 metabolism	0.494813	1.25	KFZ67_02500	174	K	K03474	pdxJ; pyridoxine 5-phosphate synthase [EC:2.6.99.2]	Pyridoxine 5'-phosphate synthase OS=Photobacterium damselae OX=38293 GN=pdxJ PE=3 SV=1	pdxJ	2	-1.128	3	K(1)IAAAASYAADLGIK	1	2.76623e-05	63.682	1	3.33052e-05	61.265	1	2.76623e-05
map00750 Vitamin B6 metabolism	0.494813	1.25	KFZ67_12220	266	K	K01733	thrC; threonine synthase [EC:4.2.3.1]	Threonine synthase OS=Photobacterium damselae OX=38293 GN=BST98_12205 PE=4 SV=1	BST98_12205	2	0.3896	3	AIGLPVK(1)R	1	0.000849655	89.55	1	0.0030927	79.469	1	0.000849655
map00785 Lipoic acid metabolism	0.486779	1.67	KFZ67_03450	12	K	K03644	lipA, LIAS, LIP1, LIP5; lipoyl synthase [EC:2.8.1.8]	Lipoyl synthase OS=Photobacterium damselae subsp. damselae OX=85581 GN=lipA PE=3 SV=1	lipA	2	1.2057	2	IEQGVK(1)YR	1	0.0247989	53.968	1	0.038971	53.968	1	0.0247989
map00903 Limonene and pinene degradation	0.58926	1.25	KFZ67_10375	366	K	K01782	fadJ; 3-hydroxyacyl-CoA dehydrogenase / enoyl-CoA hydratase / 3-hydroxybutyryl-CoA epimerase [EC:1.1.1.35 4.2.1.17 5.1.2.3]	Fatty acid oxidation complex subunit alpha OS=Photobacterium damselae OX=38293 GN=BST98_10320 PE=3 SV=1	BST98_10320	2	-0.46309	3	IISK(1)AQLQK	1	0.000320728	92.838	1	0.00155125	78.113	1	0.000320728
map00903 Limonene and pinene degradation	0.58926	1.25	KFZ67_10375	232	K	K01782	fadJ; 3-hydroxyacyl-CoA dehydrogenase / enoyl-CoA hydratase / 3-hydroxybutyryl-CoA epimerase [EC:1.1.1.35 4.2.1.17 5.1.2.3]	Fatty acid oxidation complex subunit alpha OS=Photobacterium damselae OX=38293 GN=BST98_10320 PE=3 SV=1	BST98_10320	2	0.50631	3	SVVFDQAK(1)K	1	0.00393358	61.78	1	0.00484429	59.908	1	0.00393358
map00920 Sulfur metabolism	0.30077	1.31	KFZ67_10805	137	K	K01738	cysK; cysteine synthase [EC:2.5.1.47]	Cysteine synthase OS=Photobacterium damselae OX=38293 GN=cysK PE=3 SV=1	cysK	4	0.37114	3	AEEIVASNPSK(1)YLLLQQFNNPANPEIHEK	1	3.10417e-19	94.275	1	3.10417e-19	94.275	1	6.96964e-14
map00920 Sulfur metabolism	0.30077	1.31	KFZ67_10805	105	K	K01738	cysK; cysteine synthase [EC:2.5.1.47]	Cysteine synthase OS=Photobacterium damselae OX=38293 GN=cysK PE=3 SV=1	cysK	2	1.8253	3	LLK(1)ALGANLELTEAAK	1	2.70028e-08	88.385	1	5.82873e-06	70.197	1	2.70028e-08
map00920 Sulfur metabolism	0.30077	1.31	KFZ67_13105	7	K	K00860	cysC; adenylylsulfate kinase [EC:2.7.1.25]	Adenylyl-sulfate kinase OS=Photobacterium damselae OX=38293 GN=cysC PE=3 SV=1	cysC	3	-0.27079	4	TSVLVK(1)DNVIWHQHSVNK	1	2.59995e-09	73.953	1	2.42245e-07	70.802	1	2.59995e-09
map00920 Sulfur metabolism	0.30077	1.31	KFZ67_13115	362	K	K00956	cysN; sulfate adenylyltransferase subunit 1 [EC:2.7.7.4]	Sulfate adenylyltransferase subunit 1 OS=Photobacterium damselae OX=38293 GN=cysN PE=3 SV=1	cysN	3	1.2031	5	IAGNK(1)TQGQVIGFEHQIDINK	1	5.92562e-11	82.635	1	6.81326e-07	64.522	1	5.92562e-11
map00920 Sulfur metabolism	0.30077	1.31	KFZ67_13115	459	K	K00956	cysN; sulfate adenylyltransferase subunit 1 [EC:2.7.7.4]	Sulfate adenylyltransferase subunit 1 OS=Photobacterium damselae OX=38293 GN=cysN PE=3 SV=1	cysN	3	-0.477	3	K(1)HFPHWNSSDISK	1	0.000240764	70.563	1	0.000278187	70.438	1	0.000240764
map00920 Sulfur metabolism	0.30077	1.31	KFZ67_13115	24	K	K00956	cysN; sulfate adenylyltransferase subunit 1 [EC:2.7.7.4]	Sulfate adenylyltransferase subunit 1 OS=Photobacterium damselae OX=38293 GN=cysN PE=3 SV=1	cysN	4	-0.41155	3	MNHAIQQQVAELGIEAYLDQHQNK(1)SLLR	1	7.1067e-36	119.87	1	3.02955e-35	111.55	1	7.1067e-36
map00920 Sulfur metabolism	0.30077	1.31	KFZ67_13115	278	K	K00956	cysN; sulfate adenylyltransferase subunit 1 [EC:2.7.7.4]	Sulfate adenylyltransferase subunit 1 OS=Photobacterium damselae OX=38293 GN=cysN PE=3 SV=1	cysN	2	-0.79996	2	VK(1)VLPSEK	1	5.78584e-05	105.1	1	0.000131841	98.582	1	5.78584e-05
map00920 Sulfur metabolism	0.30077	1.31	KFZ67_13115	284	K	K00956	cysN; sulfate adenylyltransferase subunit 1 [EC:2.7.7.4]	Sulfate adenylyltransferase subunit 1 OS=Photobacterium damselae OX=38293 GN=cysN PE=3 SV=1	cysN	2	0.8084	4	VLPSEK(1)ESYIER	1	9.67751e-14	125.54	1	9.67751e-14	125.54	1	1.02819e-05
map00920 Sulfur metabolism	0.30077	1.31	KFZ67_13115	105	K	K00956	cysN; sulfate adenylyltransferase subunit 1 [EC:2.7.7.4]	Sulfate adenylyltransferase subunit 1 OS=Photobacterium damselae OX=38293 GN=cysN PE=3 SV=1	cysN	2	0.17473	2	YFSTQK(1)R	1	0.000192935	107.43	1	0.000192935	107.43	1	0.000263532
map00920 Sulfur metabolism	0.30077	1.31	KFZ67_13120	115	K	K00957	cysD; sulfate adenylyltransferase subunit 2 [EC:2.7.7.4]	Sulfate adenylyltransferase subunit 2 OS=Photobacterium damselae OX=38293 GN=cysD PE=3 SV=1	cysD	2	2.5314	5	HTDIMK(1)TQALK	1	2.56317e-27	154.28	1	2.56317e-27	154.28	1	2.47953e-13
map00920 Sulfur metabolism	0.30077	1.31	KFZ67_13120	120	K	K00957	cysD; sulfate adenylyltransferase subunit 2 [EC:2.7.7.4]	Sulfate adenylyltransferase subunit 2 OS=Photobacterium damselae OX=38293 GN=cysD PE=3 SV=1	cysD	3	1.5478	3	TQALK(1)QALNQYGFDAAFGGAR	1	5.69251e-27	111.93	1	5.69251e-27	111.93	1	4.02357e-21
map00920 Sulfur metabolism	0.30077	1.31	KFZ67_13120	82	K	K00957	cysD; sulfate adenylyltransferase subunit 2 [EC:2.7.7.4]	Sulfate adenylyltransferase subunit 2 OS=Photobacterium damselae OX=38293 GN=cysD PE=3 SV=1	cysD	3	0.25407	5	K(1)YGFELLVHK	1	0.000633938	73.499	1	0.000633938	73.499	1	0.000633938
map00920 Sulfur metabolism	0.30077	1.31	KFZ67_13120	238	K	K00957	cysD; sulfate adenylyltransferase subunit 2 [EC:2.7.7.4]	Sulfate adenylyltransferase subunit 2 OS=Photobacterium damselae OX=38293 GN=cysD PE=3 SV=1	cysD	2	-1.8278	7	MPLTDSDK(1)VEQK	1	8.62978e-06	88.021	1	0.000374447	71.888	1	8.62978e-06
map00920 Sulfur metabolism	0.30077	1.31	KFZ67_13120	177	K	K00957	cysD; sulfate adenylyltransferase subunit 2 [EC:2.7.7.4]	Sulfate adenylyltransferase subunit 2 OS=Photobacterium damselae OX=38293 GN=cysD PE=3 SV=1	cysD	2	-0.80529	5	TYNGQINK(1)GESIR	1	7.87231e-17	124.07	1	1.19737e-12	116.19	1	7.87231e-17
map00920 Sulfur metabolism	0.30077	1.31	KFZ67_13160	175	K	K00381	cysI; sulfite reductase (NADPH) hemoprotein beta-component [EC:1.8.1.2]	Sulfite reductase [NADPH] hemoprotein beta-component OS=Photobacterium damsela subsp. piscicida OX=38294 GN=cysI PE=3 SV=1	cysI	2	0.50203	3	ISEHLLPK(1)TR	1	0.000759054	74.53	1	0.0123857	46.73	1	0.000759054
map00920 Sulfur metabolism	0.30077	1.31	KFZ67_13160	156	K	K00381	cysI; sulfite reductase (NADPH) hemoprotein beta-component [EC:1.8.1.2]	Sulfite reductase [NADPH] hemoprotein beta-component OS=Photobacterium damsela subsp. piscicida OX=38294 GN=cysI PE=3 SV=1	cysI	3	1.1793	4	NVLCTSNPIESK(1)LHQQAYEWAAK	1	5.26242e-06	60.133	1	5.26242e-06	60.133	1	6.69054e-05
map00920 Sulfur metabolism	0.30077	1.31	KFZ67_13160	299	K	K00381	cysI; sulfite reductase (NADPH) hemoprotein beta-component [EC:1.8.1.2]	Sulfite reductase [NADPH] hemoprotein beta-component OS=Photobacterium damsela subsp. piscicida OX=38294 GN=cysI PE=3 SV=1	cysI	2	-0.47429	2	TK(1)YTLDR	1	0.0404102	47.849	1	0.0404102	47.849	1	0.0404102
map00920 Sulfur metabolism	0.30077	1.31	KFZ67_13165	348	K	K00380	cysJ; sulfite reductase (NADPH) flavoprotein alpha-component [EC:1.8.1.2]	Sulfite reductase [NADPH] flavoprotein alpha-component OS=Photobacterium damselae OX=38293 GN=BST98_13075 PE=4 SV=1	BST98_13075	2	0.77533	3	YAELSQSK(1)R	1	5.8417e-06	109.29	1	0.000444	89.029	1	5.8417e-06
map00930 Caprolactam degradation	0.58926	1.25	KFZ67_10375	366	K	K01782	fadJ; 3-hydroxyacyl-CoA dehydrogenase / enoyl-CoA hydratase / 3-hydroxybutyryl-CoA epimerase [EC:1.1.1.35 4.2.1.17 5.1.2.3]	Fatty acid oxidation complex subunit alpha OS=Photobacterium damselae OX=38293 GN=BST98_10320 PE=3 SV=1	BST98_10320	2	-0.46309	3	IISK(1)AQLQK	1	0.000320728	92.838	1	0.00155125	78.113	1	0.000320728
map00930 Caprolactam degradation	0.58926	1.25	KFZ67_10375	232	K	K01782	fadJ; 3-hydroxyacyl-CoA dehydrogenase / enoyl-CoA hydratase / 3-hydroxybutyryl-CoA epimerase [EC:1.1.1.35 4.2.1.17 5.1.2.3]	Fatty acid oxidation complex subunit alpha OS=Photobacterium damselae OX=38293 GN=BST98_10320 PE=3 SV=1	BST98_10320	2	0.50631	3	SVVFDQAK(1)K	1	0.00393358	61.78	1	0.00484429	59.908	1	0.00393358
map00970 Aminoacyl-tRNA biosynthesis	0.000301476	2.51	KFZ67_01050	328	K	K01867	WARS, trpS; tryptophanyl-tRNA synthetase [EC:6.1.1.2]	Tryptophan--tRNA ligase OS=Photobacterium damsela subsp. piscicida OX=38294 GN=trpS PE=3 SV=1	trpS	2	-1.6477	3	K(1)AYQAVGFVTRPE	1	1.08684e-08	103.76	1	8.86808e-06	94.09	1	1.08684e-08
map00970 Aminoacyl-tRNA biosynthesis	0.000301476	2.51	KFZ67_02595	748	K	K01872	AARS, alaS; alanyl-tRNA synthetase [EC:6.1.1.7]	Alanine--tRNA ligase OS=Photobacterium damselae OX=38293 GN=alaS PE=3 SV=1	alaS	2	0.17194	3	EIQQLK(1)DK	1	0.000629206	92.838	1	0.000629206	92.838	1	0.00311702
map00970 Aminoacyl-tRNA biosynthesis	0.000301476	2.51	KFZ67_02595	588	K	K01872	AARS, alaS; alanyl-tRNA synthetase [EC:6.1.1.7]	Alanine--tRNA ligase OS=Photobacterium damselae OX=38293 GN=alaS PE=3 SV=1	alaS	2	0.78761	4	GSLVK(1)PDSLR	1	0.00064484	77.062	1	0.00074468	74.849	1	0.00064484
map00970 Aminoacyl-tRNA biosynthesis	0.000301476	2.51	KFZ67_02595	541	K	K01872	AARS, alaS; alanyl-tRNA synthetase [EC:6.1.1.7]	Alanine--tRNA ligase OS=Photobacterium damselae OX=38293 GN=alaS PE=3 SV=1	alaS	2	1.9739	2	GTLTEGALK(1)VGDK	1	0.00231264	47.774	1	0.00412704	44.44	1	0.00231264
map00970 Aminoacyl-tRNA biosynthesis	0.000301476	2.51	KFZ67_02595	574	K	K01872	AARS, alaS; alanyl-tRNA synthetase [EC:6.1.1.7]	Alanine--tRNA ligase OS=Photobacterium damselae OX=38293 GN=alaS PE=3 SV=1	alaS	2	2.0309	3	K(1)LLGEHVAQK	1	0.000227626	85.963	1	0.000227626	85.963	1	0.000268978
map00970 Aminoacyl-tRNA biosynthesis	0.000301476	2.51	KFZ67_02595	720	K	K01872	AARS, alaS; alanyl-tRNA synthetase [EC:6.1.1.7]	Alanine--tRNA ligase OS=Photobacterium damselae OX=38293 GN=alaS PE=3 SV=1	alaS	2	-2.9381	3	LVK(1)SDTASVVNK	1	0.000194755	77.124	1	0.0186698	45.183	1	0.000194755
map00970 Aminoacyl-tRNA biosynthesis	0.000301476	2.51	KFZ67_02595	670	K	K01872	AARS, alaS; alanyl-tRNA synthetase [EC:6.1.1.7]	Alanine--tRNA ligase OS=Photobacterium damselae OX=38293 GN=alaS PE=3 SV=1	alaS	3	-0.70901	3	VLSMGDFSTELCGGIHAK(1)R	1	3.79403e-29	131.56	1	3.79403e-29	131.56	1	6.79039e-16
map00970 Aminoacyl-tRNA biosynthesis	0.000301476	2.51	KFZ67_03505	146	K	K01869	LARS, leuS; leucyl-tRNA synthetase [EC:6.1.1.4]	Leucine--tRNA ligase OS=Photobacterium damselae OX=38293 GN=leuS PE=3 SV=1	leuS	2	3.2568	3	LYEK(1)GLVYK	1	0.00226316	72.607	1	0.00226316	72.607	1	0.00245935
map00970 Aminoacyl-tRNA biosynthesis	0.000301476	2.51	KFZ67_05015	330	K	K01875	SARS, serS; seryl-tRNA synthetase [EC:6.1.1.11]	Serine--tRNA ligase OS=Photobacterium damselae OX=38293 GN=serS PE=3 SV=1	serS	2	-0.60122	3	K(1)VVLCTGDMGFGSCK	1	6.90424e-05	59.728	1	0.00175625	41.695	1	6.90424e-05
map00970 Aminoacyl-tRNA biosynthesis	0.000301476	2.51	KFZ67_05040	362	K	K01874	MARS, metG; methionyl-tRNA synthetase [EC:6.1.1.10]	Methionine--tRNA ligase OS=Photobacterium damselae OX=38293 GN=metG PE=3 SV=1	metG	2	-0.078876	3	YYYAAK(1)LNSR	1	7.10743e-05	96.171	1	0.00204283	62.633	1	7.10743e-05
map00970 Aminoacyl-tRNA biosynthesis	0.000301476	2.51	KFZ67_08725	357	K	K01893	NARS, asnS; asparaginyl-tRNA synthetase [EC:6.1.1.22]	Asparagine--tRNA ligase OS=Photobacterium damselae OX=38293 GN=asnS PE=3 SV=1	asnS	2	0.64021	3	APVIVK(1)NYPK	1	2.21008e-05	103.55	1	2.21008e-05	103.55	1	2.70237e-05
map00970 Aminoacyl-tRNA biosynthesis	0.000301476	2.51	KFZ67_08725	351	K	K01893	NARS, asnS; asparaginyl-tRNA synthetase [EC:6.1.1.22]	Asparagine--tRNA ligase OS=Photobacterium damselae OX=38293 GN=asnS PE=3 SV=1	asnS	3	1.4427	3	FLAEEHFK(1)APVIVK	1	0.000183577	65.295	1	0.000183577	65.295	1	0.000183577
map00970 Aminoacyl-tRNA biosynthesis	0.000301476	2.51	KFZ67_08865	227	K	K01868	TARS, thrS; threonyl-tRNA synthetase [EC:6.1.1.3]	Threonine--tRNA ligase OS=Photobacterium damselae OX=38293 GN=thrS PE=3 SV=1	thrS	2	-1.0543	4	IYGTAFHDK(1)K	1	6.65082e-07	91.656	1	6.65082e-07	90.142	1	0.000136112
map00970 Aminoacyl-tRNA biosynthesis	0.000301476	2.51	KFZ67_08865	132	K	K01868	TARS, thrS; threonyl-tRNA synthetase [EC:6.1.1.3]	Threonine--tRNA ligase OS=Photobacterium damselae OX=38293 GN=thrS PE=3 SV=1	thrS	2	0.13283	3	TK(1)YQVVK	1	0.00354576	93.374	1	0.00462062	91.516	1	0.00354576
map00970 Aminoacyl-tRNA biosynthesis	0.000301476	2.51	KFZ67_09665	315	K	K01876	aspS; aspartyl-tRNA synthetase [EC:6.1.1.12]	Aspartate--tRNA ligase OS=Photobacterium damselae subsp. damselae OX=85581 GN=aspS PE=3 SV=1	aspS	2	-0.57051	3	VFSAPANDEK(1)GR	1	6.93175e-07	98.105	1	4.0756e-05	84.169	1	6.93175e-07
map00970 Aminoacyl-tRNA biosynthesis	0.000301476	2.51	KFZ67_09895	559	K	K01887	RARS, argS; arginyl-tRNA synthetase [EC:6.1.1.19]	Arginine--tRNA ligase OS=Photobacterium damselae OX=38293 GN=argS PE=3 SV=1	argS	2	-0.52914	3	LAHLTAK(1)TIK	1	2.28816e-05	103.31	1	0.00204179	58.132	1	2.28816e-05
map00970 Aminoacyl-tRNA biosynthesis	0.000301476	2.51	KFZ67_09895	552	K	K01887	RARS, argS; arginyl-tRNA synthetase [EC:6.1.1.19]	Arginine--tRNA ligase OS=Photobacterium damselae OX=38293 GN=argS PE=3 SV=1	argS	3	0.56983	3	LK(1)LAHLTAK	1	0.000245149	92.445	1	0.00046714	85.807	1	0.000245149
map00970 Aminoacyl-tRNA biosynthesis	0.000301476	2.51	KFZ67_10040	419	K	K01886	QARS, glnS; glutaminyl-tRNA synthetase [EC:6.1.1.18]	Glutamine--tRNA ligase OS=Photobacterium damselae OX=38293 GN=glnS PE=3 SV=1	glnS	2	0.8986	3	GAYVIK(1)AER	1	0.00124171	80.688	1	0.00542067	59.908	1	0.00124171
map00970 Aminoacyl-tRNA biosynthesis	0.000301476	2.51	KFZ67_10040	273	K	K01886	QARS, glnS; glutaminyl-tRNA synthetase [EC:6.1.1.18]	Glutamine--tRNA ligase OS=Photobacterium damselae OX=38293 GN=glnS PE=3 SV=1	glnS	2	-1.4555	2	K(1)LNQLVTDK	1	6.2257e-05	100.58	1	6.2257e-05	100.58	1	0.000210016
map00970 Aminoacyl-tRNA biosynthesis	0.000301476	2.51	KFZ67_10775	149	K	K01885	EARS, gltX; glutamyl-tRNA synthetase [EC:6.1.1.17]	Glutamate--tRNA ligase OS=Photobacterium damselae OX=38293 GN=gltX PE=3 SV=1	gltX	2	1.6583	3	NPK(1)EGTVVFDDK	1	1.23286e-06	87.831	1	1.23286e-06	87.831	1	0.000137476
map00970 Aminoacyl-tRNA biosynthesis	0.000301476	2.51	KFZ67_12050	418	K	K01870	IARS, ileS; isoleucyl-tRNA synthetase [EC:6.1.1.5]	Isoleucine--tRNA ligase OS=Photobacterium damselae OX=38293 GN=ileS PE=3 SV=1	ileS	3	-0.4391	3	HK(1)TPIIFR	1	0.0350659	42.599	1	0.0350659	42.599	1	0.0350659
map00970 Aminoacyl-tRNA biosynthesis	0.000301476	2.51	KFZ67_12140	145	K	K04567	KARS, lysS; lysyl-tRNA synthetase, class II [EC:6.1.1.6]	Lysine--tRNA ligase OS=Photobacterium damselae OX=38293 GN=lysS PE=3 SV=1	lysS	4	0.41329	3	ALRPLPEK(1)FHGLTDQEMR	1	1.7499e-09	81.51	1	2.15147e-06	61.757	1	1.7499e-09
map00970 Aminoacyl-tRNA biosynthesis	0.000301476	2.51	KFZ67_12140	92	K	K04567	KARS, lysS; lysyl-tRNA synthetase, class II [EC:6.1.1.6]	Lysine--tRNA ligase OS=Photobacterium damselae OX=38293 GN=lysS PE=3 SV=1	lysS	2	0.11828	3	IQAYASK(1)DVQK	1	0.000328187	74.611	1	0.000328187	74.611	1	0.00149836
map00970 Aminoacyl-tRNA biosynthesis	0.000301476	2.51	KFZ67_12140	10	K	K04567	KARS, lysS; lysyl-tRNA synthetase, class II [EC:6.1.1.6]	Lysine--tRNA ligase OS=Photobacterium damselae OX=38293 GN=lysS PE=3 SV=1	lysS	2	0.21462	3	TDQVQDENK(1)LIAER	1	8.13915e-10	99.927	1	8.13915e-10	99.927	1	4.34702e-05
map00970 Aminoacyl-tRNA biosynthesis	0.000301476	2.51	KFZ67_12495	342	K	K01873	VARS, valS; valyl-tRNA synthetase [EC:6.1.1.9]	Valine--tRNA ligase OS=Photobacterium damselae OX=38293 GN=valS PE=3 SV=1	valS	4	1.4054	3	K(1)AIVAEFDELGLLEEIKDHDLQVPYGDR	1	8.76996e-26	98.84	0.999997	1.19955e-12	73.753	1	8.76996e-26
map00970 Aminoacyl-tRNA biosynthesis	0.000301476	2.51	KFZ67_12495	243	K	K01873	VARS, valS; valyl-tRNA synthetase [EC:6.1.1.9]	Valine--tRNA ligase OS=Photobacterium damselae OX=38293 GN=valS PE=3 SV=1	valS	2	0.1056	3	YK(1)DLIGK	1	0.0367198	58.596	1	0.0530601	47.657	1	0.0367198
map00970 Aminoacyl-tRNA biosynthesis	0.000301476	2.51	KFZ67_12495	209	K	K01873	VARS, valS; valyl-tRNA synthetase [EC:6.1.1.9]	Valine--tRNA ligase OS=Photobacterium damselae OX=38293 GN=valS PE=3 SV=1	valS	2	-0.70813	2	YPLADGVK(1)TADGK	1	0.000386924	51.009	1	0.000386924	51.009	1	0.00190264
map00983 Drug metabolism - other enzymes	0.0966644	1.93	KFZ67_02060	2	K	K00760	hprT, hpt, HPRT1; hypoxanthine phosphoribosyltransferase [EC:2.4.2.8]	Hypoxanthine phosphoribosyltransferase OS=Photobacterium damsela subsp. piscicida OX=38294 GN=hpt PE=3 SV=1	hpt	3	-2.107	3	MK(1)QHTIEVMISEQEVQER	1	3.15432e-12	95.205	1	3.15432e-12	95.205	1	3.58587e-12
map00983 Drug metabolism - other enzymes	0.0966644	1.93	KFZ67_07015	385	K	K03782	katG; catalase-peroxidase [EC:1.11.1.21]	Catalase-peroxidase OS=Photobacterium damselae OX=38293 GN=katG PE=3 SV=1	katG	2	-0.048443	4	FDPAYEK(1)ISR	1	1.09275e-07	115.57	1	1.18768e-05	106.62	1	1.09275e-07
map00983 Drug metabolism - other enzymes	0.0966644	1.93	KFZ67_07015	587	K	K03782	katG; catalase-peroxidase [EC:1.11.1.21]	Catalase-peroxidase OS=Photobacterium damselae OX=38293 GN=katG PE=3 SV=1	katG	2	-0.98567	3	K(1)FSVSQEELLLDR	1	1.58557e-65	190.85	1	4.57251e-17	127.79	1	1.58557e-65
map00983 Drug metabolism - other enzymes	0.0966644	1.93	KFZ67_07015	142	K	K03782	katG; catalase-peroxidase [EC:1.11.1.21]	Catalase-peroxidase OS=Photobacterium damselae OX=38293 GN=katG PE=3 SV=1	katG	2	0.38702	3	LIWPIK(1)QK	1	0.00430093	77.058	1	0.00430093	77.058	1	0.00430093
map00983 Drug metabolism - other enzymes	0.0966644	1.93	KFZ67_07015	452	K	K03782	katG; catalase-peroxidase [EC:1.11.1.21]	Catalase-peroxidase OS=Photobacterium damselae OX=38293 GN=katG PE=3 SV=1	katG	2	1.0753	3	LK(1)QEIAASGLSVR	1	1.3795e-12	115.24	1	1.66491e-09	100.69	1	1.3795e-12
map00983 Drug metabolism - other enzymes	0.0966644	1.93	KFZ67_11175	358	K	K01951	guaA, GMPS; GMP synthase (glutamine-hydrolysing) [EC:6.3.5.2]	GMP synthase [glutamine-hydrolyzing] OS=Photobacterium damselae OX=38293 GN=guaA PE=3 SV=1	guaA	4	1.4048	5	AHVIK(1)SHHNVGGLPDDMQMGLVEPLK	1	6.96485e-17	91.416	1	2.77991e-11	76.799	1	6.96485e-17
map00983 Drug metabolism - other enzymes	0.0966644	1.93	KFZ67_11180	177	K	K00088	IMPDH, guaB; IMP dehydrogenase [EC:1.1.1.205]	Inosine-5'-monophosphate dehydrogenase OS=Photobacterium damsela subsp. piscicida OX=38294 GN=guaB PE=3 SV=1	guaB	2	-1.9088	2	EEVEAIMQK(1)HR	1	0.00193172	47.894	1	0.00866644	43.958	1	0.00193172
map00983 Drug metabolism - other enzymes	0.0966644	1.93	KFZ67_11180	428	K	K00088	IMPDH, guaB; IMP dehydrogenase [EC:1.1.1.205]	Inosine-5'-monophosphate dehydrogenase OS=Photobacterium damsela subsp. piscicida OX=38294 GN=guaB PE=3 SV=1	guaB	2	0.31805	2	GHLK(1)EIVHQQMGGLR	1	3.31439e-06	76.311	1	3.31439e-06	76.311	1	0.00245776
map00983 Drug metabolism - other enzymes	0.0966644	1.93	KFZ67_11180	396	K	K00088	IMPDH, guaB; IMP dehydrogenase [EC:1.1.1.205]	Inosine-5'-monophosphate dehydrogenase OS=Photobacterium damsela subsp. piscicida OX=38294 GN=guaB PE=3 SV=1	guaB	2	-1.9974	7	GMGSLGAMSK(1)GSSDR	1	3.2575e-05	63.062	1	3.2575e-05	63.062	1	0.000111114
map00983 Drug metabolism - other enzymes	0.0966644	1.93	KFZ67_11180	199	K	K00088	IMPDH, guaB; IMP dehydrogenase [EC:1.1.1.205]	Inosine-5'-monophosphate dehydrogenase OS=Photobacterium damsela subsp. piscicida OX=38294 GN=guaB PE=3 SV=1	guaB	2	1.3907	3	GMITAK(1)DFQK	1	0.000432502	81.771	1	0.00180077	64.73	1	0.000432502
map00983 Drug metabolism - other enzymes	0.0966644	1.93	KFZ67_11180	456	K	K00088	IMPDH, guaB; IMP dehydrogenase [EC:1.1.1.205]	Inosine-5'-monophosphate dehydrogenase OS=Photobacterium damsela subsp. piscicida OX=38294 GN=guaB PE=3 SV=1	guaB	2	2.3404	2	TK(1)AEFVR	1	0.0220065	69.905	1	0.0305778	63.21	1	0.0220065
map00983 Drug metabolism - other enzymes	0.0966644	1.93	KFZ67_11180	182	K	K00088	IMPDH, guaB; IMP dehydrogenase [EC:1.1.1.205]	Inosine-5'-monophosphate dehydrogenase OS=Photobacterium damsela subsp. piscicida OX=38294 GN=guaB PE=3 SV=1	guaB	2	1.4398	8	VEK(1)VLLVDDSFR	1	2.87563e-20	144.57	1	4.23559e-20	143.42	1	2.87563e-20
map00983 Drug metabolism - other enzymes	0.0966644	1.93	KFZ67_11240	16	K	K00940	ndk, NME; nucleoside-diphosphate kinase [EC:2.7.4.6]	Nucleoside diphosphate kinase OS=Photobacterium damselae OX=38293 GN=ndk PE=3 SV=1	ndk	2	0.78342	3	TFSIVKPDAVK(1)R	0.999988	6.46098e-05	90.434	0.999988	6.46098e-05	90.434	0.999405	0.000108127
map00998 Biosynthesis of various secondary metabolites - part 2	0.199206	5.02	KFZ67_05150	10	K	K02078	acpP; acyl carrier protein	Acyl carrier protein OS=Photobacterium damsela subsp. piscicida OX=38294 GN=acpP PE=3 SV=1	acpP	3	1.0574	3	K(1)IIVEQLGVDESEVK	1	3.15493e-08	89.911	1	2.77047e-05	62.055	1	3.15493e-08
map01051 Biosynthesis of ansamycins	0.358856	2.51	KFZ67_17960	243	K	K00615	E2.2.1.1, tktA, tktB; transketolase [EC:2.2.1.1]	Transketolase OS=Photobacterium damselae OX=38293 GN=tkt PE=3 SV=1	tkt	3	-0.54468	4	ADTTRPTLICCK(1)TIIGFGSPNK	1	1.47338e-10	67.895	1	1.47338e-10	65.833	1	4.51088e-07
map01120 Microbial metabolism in diverse environments	3.40517e-09	1.86	KFZ67_00790	85	K	K15633	gpmI; 2,3-bisphosphoglycerate-independent phosphoglycerate mutase [EC:5.4.2.12]	2,3-bisphosphoglycerate-independent phosphoglycerate mutase OS=Photobacterium damselae OX=38293 GN=gpmI PE=3 SV=1	gpmI	3	1.0038	4	ITK(1)AISDGEFFENDVLVAAMDAAIK	1	1.0874e-07	69.284	1	1.0874e-07	69.284	1	3.09664e-05
map01120 Microbial metabolism in diverse environments	3.40517e-09	1.86	KFZ67_00790	5	K	K15633	gpmI; 2,3-bisphosphoglycerate-independent phosphoglycerate mutase [EC:5.4.2.12]	2,3-bisphosphoglycerate-independent phosphoglycerate mutase OS=Photobacterium damselae OX=38293 GN=gpmI PE=3 SV=1	gpmI	3	0.59951	3	K(1)PLALVILDGWGYR	1	7.4024e-10	98.337	1	7.4024e-10	98.337	1	4.98505e-05
map01120 Microbial metabolism in diverse environments	3.40517e-09	1.86	KFZ67_00790	480	K	K15633	gpmI; 2,3-bisphosphoglycerate-independent phosphoglycerate mutase [EC:5.4.2.12]	2,3-bisphosphoglycerate-independent phosphoglycerate mutase OS=Photobacterium damselae OX=38293 GN=gpmI PE=3 SV=1	gpmI	2	1.5935	4	SLTLK(1)DNGK	1	4.4525e-24	148.52	1	4.99976e-24	147.2	1	4.4525e-24
map01120 Microbial metabolism in diverse environments	3.40517e-09	1.86	KFZ67_00835	215	K	K00850	pfkA, PFK; 6-phosphofructokinase 1 [EC:2.7.1.11]	ATP-dependent 6-phosphofructokinase OS=Photobacterium damselae OX=38293 GN=pfkA PE=3 SV=1	pfkA	3	1.7226	3	K(1)HAIIAITELMTDVNELAK	1	2.59634e-12	94.281	1	8.68522e-12	85.937	1	2.59634e-12
map01120 Microbial metabolism in diverse environments	3.40517e-09	1.86	KFZ67_00840	11	K	K01803	TPI, tpiA; triosephosphate isomerase (TIM) [EC:5.3.1.1]	Triosephosphate isomerase OS=Photobacterium damselae OX=38293 GN=tpiA PE=3 SV=1	tpiA	2	1.236	7	HPVVMGNWK(1)LNGSK	1	4.98702e-13	116.63	1	8.79917e-05	73.415	1	4.98702e-13
map01120 Microbial metabolism in diverse environments	3.40517e-09	1.86	KFZ67_00945	156	K	K01595	ppc; phosphoenolpyruvate carboxylase [EC:4.1.1.31]	Phosphoenolpyruvate carboxylase OS=Photobacterium damselae OX=38293 GN=ppc PE=3 SV=1	ppc	2	2.0717	3	LVQINK(1)CLSK	1	0.000452132	81.335	1	0.000466514	81.017	1	0.000452132
map01120 Microbial metabolism in diverse environments	3.40517e-09	1.86	KFZ67_01065	311	K	K00821	argD; acetylornithine/N-succinyldiaminopimelate aminotransferase [EC:2.6.1.11 2.6.1.17]	Acetylornithine aminotransferase OS=Photobacterium damselae subsp. damselae OX=85581 GN=argD PE=3 SV=1	argD	3	0.26568	4	AAISEIIKPELLAGVK(1)ER	1	1.06545e-15	105.06	0.999999	1.67532e-11	87.24	1	1.06545e-15
map01120 Microbial metabolism in diverse environments	3.40517e-09	1.86	KFZ67_01975	466	K	K00163	aceE; pyruvate dehydrogenase E1 component [EC:1.2.4.1]	Pyruvate dehydrogenase E1 component OS=Photobacterium damselae subsp. damselae OX=85581 GN=aceE PE=4 SV=1	aceE	3	-0.23359	3	DALHGYTPK(1)R	1	9.94784e-05	93.096	1	0.00140899	64.82	1	9.94784e-05
map01120 Microbial metabolism in diverse environments	3.40517e-09	1.86	KFZ67_01975	360	K	K00163	aceE; pyruvate dehydrogenase E1 component [EC:1.2.4.1]	Pyruvate dehydrogenase E1 component OS=Photobacterium damselae subsp. damselae OX=85581 GN=aceE PE=4 SV=1	aceE	3	-1.3058	4	YPETAALVADMTDDEIFALK(1)R	1	3.65445e-07	68.952	1	9.00136e-07	62.648	1	3.65445e-07
map01120 Microbial metabolism in diverse environments	3.40517e-09	1.86	KFZ67_01975	389	K	K00163	aceE; pyruvate dehydrogenase E1 component [EC:1.2.4.1]	Pyruvate dehydrogenase E1 component OS=Photobacterium damselae subsp. damselae OX=85581 GN=aceE PE=4 SV=1	aceE	2	0.039841	4	ETQGKPTVILAK(1)TIK	0.999998	0.000260164	65.231	0.999975	0.00226635	54.764	0.999998	0.000260164
map01120 Microbial metabolism in diverse environments	3.40517e-09	1.86	KFZ67_01975	392	K	K00163	aceE; pyruvate dehydrogenase E1 component [EC:1.2.4.1]	Pyruvate dehydrogenase E1 component OS=Photobacterium damselae subsp. damselae OX=85581 GN=aceE PE=4 SV=1	aceE	2	0.54867	9	TIK(1)GYGMGDAAEGK	1	1.16173e-06	87.519	1	5.03359e-05	78.69	1	1.16173e-06
map01120 Microbial metabolism in diverse environments	3.40517e-09	1.86	KFZ67_01975	509	K	K00163	aceE; pyruvate dehydrogenase E1 component [EC:1.2.4.1]	Pyruvate dehydrogenase E1 component OS=Photobacterium damselae subsp. damselae OX=85581 GN=aceE PE=4 SV=1	aceE	2	0.1758	4	ILNILLK(1)DK	1	0.000680928	85.355	1	0.00194444	74.841	1	0.000680928
map01120 Microbial metabolism in diverse environments	3.40517e-09	1.86	KFZ67_01975	411	K	K00163	aceE; pyruvate dehydrogenase E1 component [EC:1.2.4.1]	Pyruvate dehydrogenase E1 component OS=Photobacterium damselae subsp. damselae OX=85581 GN=aceE PE=4 SV=1	aceE	4	-2.3066	7	K(1)MDMTHVQHLR	1	4.7509e-06	108.7	1	0.00011672	79.659	1	4.7509e-06
map01120 Microbial metabolism in diverse environments	3.40517e-09	1.86	KFZ67_01975	377	K	K00163	aceE; pyruvate dehydrogenase E1 component [EC:1.2.4.1]	Pyruvate dehydrogenase E1 component OS=Photobacterium damselae subsp. damselae OX=85581 GN=aceE PE=4 SV=1	aceE	2	-4.3321	3	LFAAFNNAK(1)ETQGK	1	6.94686e-05	81.904	1	6.94686e-05	76.01	1	7.7979e-05
map01120 Microbial metabolism in diverse environments	3.40517e-09	1.86	KFZ67_01975	872	K	K00163	aceE; pyruvate dehydrogenase E1 component [EC:1.2.4.1]	Pyruvate dehydrogenase E1 component OS=Photobacterium damselae subsp. damselae OX=85581 GN=aceE PE=4 SV=1	aceE	2	1.5299	6	SVVADAIK(1)K	1	0.00364803	63.397	1	0.00393358	61.78	1	0.00364803
map01120 Microbial metabolism in diverse environments	3.40517e-09	1.86	KFZ67_01980	339	K	K00627	DLAT, aceF, pdhC; pyruvate dehydrogenase E2 component (dihydrolipoamide acetyltransferase) [EC:2.3.1.12]	Acetyltransferase component of pyruvate dehydrogenase complex OS=Photobacterium damselae subsp. damselae OX=85581 GN=aceF PE=3 SV=1	aceF	2	1.0038	3	EFGVNLAK(1)VK	1	0.000550774	79.148	1	0.000550774	79.148	1	0.00134743
map01120 Microbial metabolism in diverse environments	3.40517e-09	1.86	KFZ67_01980	351	K	K00627	DLAT, aceF, pdhC; pyruvate dehydrogenase E2 component (dihydrolipoamide acetyltransferase) [EC:2.3.1.12]	Acetyltransferase component of pyruvate dehydrogenase complex OS=Photobacterium damselae subsp. damselae OX=85581 GN=aceF PE=3 SV=1	aceF	2	0.33202	3	ILK(1)EDVQNFVK	1	2.46783e-09	116.55	1	2.46783e-09	116.55	1	2.87648e-09
map01120 Microbial metabolism in diverse environments	3.40517e-09	1.86	KFZ67_01985	256	K	K00382	DLD, lpd, pdhD; dihydrolipoamide dehydrogenase [EC:1.8.1.4]	Dihydrolipoyl dehydrogenase OS=Photobacterium damselae OX=38293 GN=lpdA PE=3 SV=1	lpdA	2	0.49886	3	EDGIYVSMEGK(1)K	1	0.000201095	75.739	1	0.000201095	75.739	1	0.00026044
map01120 Microbial metabolism in diverse environments	3.40517e-09	1.86	KFZ67_01985	300	K	K00382	DLD, lpd, pdhD; dihydrolipoamide dehydrogenase [EC:1.8.1.4]	Dihydrolipoyl dehydrogenase OS=Photobacterium damselae OX=38293 GN=lpdA PE=3 SV=1	lpdA	2	-0.61459	7	GFIHVDK(1)QMR	1	1.1894e-07	114.97	1	0.000187872	89.679	1	1.1894e-07
map01120 Microbial metabolism in diverse environments	3.40517e-09	1.86	KFZ67_01985	285	K	K00382	DLD, lpd, pdhD; dihydrolipoamide dehydrogenase [EC:1.8.1.4]	Dihydrolipoyl dehydrogenase OS=Photobacterium damselae OX=38293 GN=lpdA PE=3 SV=1	lpdA	2	0.00077076	3	LLDAEK(1)AGIEVDER	1	1.16173e-06	87.519	1	1.16173e-06	87.519	1	1.50465e-05
map01120 Microbial metabolism in diverse environments	3.40517e-09	1.86	KFZ67_01985	152	K	K00382	DLD, lpd, pdhD; dihydrolipoamide dehydrogenase [EC:1.8.1.4]	Dihydrolipoyl dehydrogenase OS=Photobacterium damselae OX=38293 GN=lpdA PE=3 SV=1	lpdA	3	-0.61856	2	PIK(1)LPFIPHEDPR	1	0.000130685	73.927	1	0.000391848	65.043	1	0.000130685
map01120 Microbial metabolism in diverse environments	3.40517e-09	1.86	KFZ67_01985	279	K	K00382	DLD, lpd, pdhD; dihydrolipoamide dehydrogenase [EC:1.8.1.4]	Dihydrolipoyl dehydrogenase OS=Photobacterium damselae OX=38293 GN=lpdA PE=3 SV=1	lpdA	2	-0.014866	6	VPNGK(1)LLDAEK	1	7.26591e-06	94.402	1	7.26591e-06	94.402	1	6.00796e-05
map01120 Microbial metabolism in diverse environments	3.40517e-09	1.86	KFZ67_02005	387	K	K01682	acnB; aconitate hydratase 2 / 2-methylisocitrate dehydratase [EC:4.2.1.3 4.2.1.99]	Aconitate hydratase B OS=Photobacterium damselae subsp. damselae OX=85581 GN=acnB PE=3 SV=1	acnB	2	2.1684	6	GYTLAQK(1)MVGK	1	0.000309863	72.2	1	0.000309863	72.2	1	0.000468429
map01120 Microbial metabolism in diverse environments	3.40517e-09	1.86	KFZ67_02330	27	K	K00927	PGK, pgk; phosphoglycerate kinase [EC:2.7.2.3]	Phosphoglycerate kinase OS=Photobacterium damsela subsp. piscicida OX=38294 GN=pgk PE=3 SV=1	pgk	2	-0.89737	7	ADLNVPVK(1)DGK	1	0.000824172	68.676	1	0.00127952	64.121	1	0.000824172
map01120 Microbial metabolism in diverse environments	3.40517e-09	1.86	KFZ67_02330	53	K	K00927	PGK, pgk; phosphoglycerate kinase [EC:2.7.2.3]	Phosphoglycerate kinase OS=Photobacterium damsela subsp. piscicida OX=38294 GN=pgk PE=3 SV=1	pgk	3	-0.76268	3	HCLEAGAK(1)VMVTSHLGR	1	8.61424e-13	103.13	1	3.76371e-06	65.105	1	8.61424e-13
map01120 Microbial metabolism in diverse environments	3.40517e-09	1.86	KFZ67_02330	374	K	K00927	PGK, pgk; phosphoglycerate kinase [EC:2.7.2.3]	Phosphoglycerate kinase OS=Photobacterium damsela subsp. piscicida OX=38294 GN=pgk PE=3 SV=1	pgk	2	-0.1494	6	K(1)LPAVEMLETR	1	9.57148e-06	92.247	1	9.57148e-06	92.247	1	1.83278e-05
map01120 Microbial metabolism in diverse environments	3.40517e-09	1.86	KFZ67_02330	14	K	K00927	PGK, pgk; phosphoglycerate kinase [EC:2.7.2.3]	Phosphoglycerate kinase OS=Photobacterium damsela subsp. piscicida OX=38294 GN=pgk PE=3 SV=1	pgk	2	0.018359	19	MTDLDLAGK(1)R	1	2.85585e-45	179.1	1	2.85585e-45	179.1	1	1.47692e-24
map01120 Microbial metabolism in diverse environments	3.40517e-09	1.86	KFZ67_02330	193	K	K00927	PGK, pgk; phosphoglycerate kinase [EC:2.7.2.3]	Phosphoglycerate kinase OS=Photobacterium damsela subsp. piscicida OX=38294 GN=pgk PE=3 SV=1	pgk	2	4.0599	5	PMVAIVGGSK(1)VSTK	1	2.20557e-05	82.651	1	2.20557e-05	82.651	1	8.49995e-05
map01120 Microbial metabolism in diverse environments	3.40517e-09	1.86	KFZ67_02330	197	K	K00927	PGK, pgk; phosphoglycerate kinase [EC:2.7.2.3]	Phosphoglycerate kinase OS=Photobacterium damsela subsp. piscicida OX=38294 GN=pgk PE=3 SV=1	pgk	2	-1.0685	3	VSTK(1)LTVLESLSK	1	0.000130554	77.204	1	0.0004135	68.044	1	0.000130554
map01120 Microbial metabolism in diverse environments	3.40517e-09	1.86	KFZ67_02330	5	K	K00927	PGK, pgk; phosphoglycerate kinase [EC:2.7.2.3]	Phosphoglycerate kinase OS=Photobacterium damsela subsp. piscicida OX=38294 GN=pgk PE=3 SV=1	pgk	2	1.8353	13	SVIK(1)MTDLDLAGK	1	0.000249755	71.879	1	0.000249755	71.879	1	0.000265057
map01120 Microbial metabolism in diverse environments	3.40517e-09	1.86	KFZ67_02335	72	K	K01624	FBA, fbaA; fructose-bisphosphate aldolase, class II [EC:4.1.2.13]	Fructose-bisphosphate aldolase OS=Photobacterium damselae OX=38293 GN=fbaA PE=3 SV=1	fbaA	3	2.129	2	APVIVQFSNGGAAFFAGK(1)GLK	1	9.91832e-36	133.94	1	3.94466e-35	131.67	1	9.91832e-36
map01120 Microbial metabolism in diverse environments	3.40517e-09	1.86	KFZ67_02335	75	K	K01624	FBA, fbaA; fructose-bisphosphate aldolase, class II [EC:4.1.2.13]	Fructose-bisphosphate aldolase OS=Photobacterium damselae OX=38293 GN=fbaA PE=3 SV=1	fbaA	2	1.6554	6	GLK(1)LEGQEAQIK	1	8.87281e-06	87.719	1	0.00424577	63.091	1	8.87281e-06
map01120 Microbial metabolism in diverse environments	3.40517e-09	1.86	KFZ67_02335	29	K	K01624	FBA, fbaA; fructose-bisphosphate aldolase, class II [EC:4.1.2.13]	Fructose-bisphosphate aldolase OS=Photobacterium damselae OX=38293 GN=fbaA PE=3 SV=1	fbaA	3	-1.3666	2	ENK(1)FALPAVNVVNTDTINGVLEAAAK	1	1.71893e-11	80.02	1	1.71893e-11	80.02	1	1.01532e-07
map01120 Microbial metabolism in diverse environments	3.40517e-09	1.86	KFZ67_02335	325	K	K01624	FBA, fbaA; fructose-bisphosphate aldolase, class II [EC:4.1.2.13]	Fructose-bisphosphate aldolase OS=Photobacterium damselae OX=38293 GN=fbaA PE=3 SV=1	fbaA	3	-0.39934	10	KFEAENHDYLQGQIGNPTGPDAPNK(1)K	1	1.11269e-42	130.98	1	9.16463e-33	114.75	1	1.11269e-42
map01120 Microbial metabolism in diverse environments	3.40517e-09	1.86	KFZ67_02335	84	K	K01624	FBA, fbaA; fructose-bisphosphate aldolase, class II [EC:4.1.2.13]	Fructose-bisphosphate aldolase OS=Photobacterium damselae OX=38293 GN=fbaA PE=3 SV=1	fbaA	2	0.40311	5	LEGQEAQIK(1)GAVAGAK	1	9.57618e-09	94.487	1	9.57618e-09	94.487	1	2.26457e-08
map01120 Microbial metabolism in diverse environments	3.40517e-09	1.86	KFZ67_02335	20	K	K01624	FBA, fbaA; fructose-bisphosphate aldolase, class II [EC:4.1.2.13]	Fructose-bisphosphate aldolase OS=Photobacterium damselae OX=38293 GN=fbaA PE=3 SV=1	fbaA	3	0.52701	5	IFDFVKPGVISGDDVQK(1)VFEVAK	1	4.81435e-22	107.21	0.999677	5.6263e-07	64.749	1	4.81435e-22
map01120 Microbial metabolism in diverse environments	3.40517e-09	1.86	KFZ67_02335	26	K	K01624	FBA, fbaA; fructose-bisphosphate aldolase, class II [EC:4.1.2.13]	Fructose-bisphosphate aldolase OS=Photobacterium damselae OX=38293 GN=fbaA PE=3 SV=1	fbaA	2	1.0733	6	VFEVAK(1)ENK	1	1.00106e-07	119.75	1	1.00106e-07	119.75	1	3.84516e-05
map01120 Microbial metabolism in diverse environments	3.40517e-09	1.86	KFZ67_02335	301	K	K01624	FBA, fbaA; fructose-bisphosphate aldolase, class II [EC:4.1.2.13]	Fructose-bisphosphate aldolase OS=Photobacterium damselae OX=38293 GN=fbaA PE=3 SV=1	fbaA	3	0.21001	8	K(1)FEAENHDYLQGQIGNPTGPDAPNK	1	2.10236e-16	86.18	1	1.18301e-07	69.284	1	2.10236e-16
map01120 Microbial metabolism in diverse environments	3.40517e-09	1.86	KFZ67_02335	113	K	K01624	FBA, fbaA; fructose-bisphosphate aldolase, class II [EC:4.1.2.13]	Fructose-bisphosphate aldolase OS=Photobacterium damselae OX=38293 GN=fbaA PE=3 SV=1	fbaA	5	-0.76607	13	YVHAIAETYGVPVILHTDHAAK(1)K	1	1.63571e-44	136.49	1	3.60001e-35	122.94	1	1.63571e-44
map01120 Microbial metabolism in diverse environments	3.40517e-09	1.86	KFZ67_02360	8	K	K01807	rpiA; ribose 5-phosphate isomerase A [EC:5.3.1.6]	Ribose-5-phosphate isomerase A OS=Photobacterium damselae OX=38293 GN=rpiA PE=3 SV=1	rpiA	2	0.91171	3	K(1)AAGWAALEYVK	1	0.00172073	56.569	1	0.00289524	49.269	1	0.00172073
map01120 Microbial metabolism in diverse environments	3.40517e-09	1.86	KFZ67_02535	427	K	K01689	ENO, eno; enolase [EC:4.2.1.11]	Enolase OS=Photobacterium damselae OX=38293 GN=eno PE=3 SV=1	eno	2	-0.59808	8	APFNGLK(1)EVK	1	0.000183885	89.9	1	0.00111448	70.675	1	0.000183885
map01120 Microbial metabolism in diverse environments	3.40517e-09	1.86	KFZ67_02535	85	K	K01689	ENO, eno; enolase [EC:4.2.1.11]	Enolase OS=Photobacterium damselae OX=38293 GN=eno PE=3 SV=1	eno	3	-1.2424	15	DAK(1)DQAAIDQIMIDLDGTENK	1	7.41891e-64	162.73	1	7.41891e-64	162.73	1	2.42034e-53
map01120 Microbial metabolism in diverse environments	3.40517e-09	1.86	KFZ67_02535	255	K	K01689	ENO, eno; enolase [EC:4.2.1.11]	Enolase OS=Photobacterium damselae OX=38293 GN=eno PE=3 SV=1	eno	3	4.3109	11	DVTLAMDCAASEFYNK(1)EEGIYDLK	1	1.54896e-23	98.3	1	6.03072e-08	71.651	1	1.54896e-23
map01120 Microbial metabolism in diverse environments	3.40517e-09	1.86	KFZ67_02535	263	K	K01689	ENO, eno; enolase [EC:4.2.1.11]	Enolase OS=Photobacterium damselae OX=38293 GN=eno PE=3 SV=1	eno	2	-1.1276	10	EEGIYDLK(1)GEGK	1	5.62616e-07	100.38	1	1.52967e-06	96.82	1	5.62616e-07
map01120 Microbial metabolism in diverse environments	3.40517e-09	1.86	KFZ67_02535	62	K	K01689	ENO, eno; enolase [EC:4.2.1.11]	Enolase OS=Photobacterium damselae OX=38293 GN=eno PE=3 SV=1	eno	2	-0.40512	5	FLGK(1)GVLK	1	0.00689487	70.552	1	0.0283621	49.097	1	0.00689487
map01120 Microbial metabolism in diverse environments	3.40517e-09	1.86	KFZ67_02535	66	K	K01689	ENO, eno; enolase [EC:4.2.1.11]	Enolase OS=Photobacterium damselae OX=38293 GN=eno PE=3 SV=1	eno	3	0.30804	6	GVLK(1)AVTAVNGPIAEALLGK	1	1.65234e-12	88.176	1	6.02277e-10	74.029	1	1.65234e-12
map01120 Microbial metabolism in diverse environments	3.40517e-09	1.86	KFZ67_02535	358	K	K01689	ENO, eno; enolase [EC:4.2.1.11]	Enolase OS=Photobacterium damselae OX=38293 GN=eno PE=3 SV=1	eno	3	0.29186	3	FNQIGSLTETLAAIK(1)MAK	1	5.20181e-12	93.495	1	5.20181e-12	93.495	1	1.24077e-09
map01120 Microbial metabolism in diverse environments	3.40517e-09	1.86	KFZ67_02535	361	K	K01689	ENO, eno; enolase [EC:4.2.1.11]	Enolase OS=Photobacterium damselae OX=38293 GN=eno PE=3 SV=1	eno	3	-0.37269	7	MAK(1)DAGYTAVISHR	1	2.26609e-32	157.86	1	2.95933e-18	133.48	1	2.26609e-32
map01120 Microbial metabolism in diverse environments	3.40517e-09	1.86	KFZ67_02535	326	K	K01689	ENO, eno; enolase [EC:4.2.1.11]	Enolase OS=Photobacterium damselae OX=38293 GN=eno PE=3 SV=1	eno	3	-0.44436	3	IQLVGDDLFVTNTK(1)ILAEGIEK	1	3.12209e-35	130.89	1	3.12209e-35	130.89	1	2.17598e-21
map01120 Microbial metabolism in diverse environments	3.40517e-09	1.86	KFZ67_02535	312	K	K01689	ENO, eno; enolase [EC:4.2.1.11]	Enolase OS=Photobacterium damselae OX=38293 GN=eno PE=3 SV=1	eno	3	1.3262	5	LLGDK(1)IQLVGDDLFVTNTK	1	2.90195e-22	121.01	1	2.23582e-21	111.6	1	2.90195e-22
map01120 Microbial metabolism in diverse environments	3.40517e-09	1.86	KFZ67_02535	120	K	K01689	ENO, eno; enolase [EC:4.2.1.11]	Enolase OS=Photobacterium damselae OX=38293 GN=eno PE=3 SV=1	eno	3	-0.13408	4	SNFGANAILAVSLANAK(1)AAAAAK	1	1.97278e-35	129.2	1	1.97278e-35	129.2	1	1.65142e-27
map01120 Microbial metabolism in diverse environments	3.40517e-09	1.86	KFZ67_02535	406	K	K01689	ENO, eno; enolase [EC:4.2.1.11]	Enolase OS=Photobacterium damselae OX=38293 GN=eno PE=3 SV=1	eno	2	-0.2721	5	VAK(1)YNQLIR	1	6.97595e-17	138.54	1	8.41821e-17	136.8	1	6.97595e-17
map01120 Microbial metabolism in diverse environments	3.40517e-09	1.86	KFZ67_02865	28	K	K01580	E4.1.1.15, gadB, gadA, GAD; glutamate decarboxylase [EC:4.1.1.15]	Glutamate decarboxylase OS=Photobacterium damselae subsp. damselae OX=85581 GN=gadA PE=3 SV=1	gadA	3	1.521	5	EQGADPIFGSDALSHIASSK(1)K	1	7.9544e-16	91.276	1	9.90997e-16	89.663	1	7.9544e-16
map01120 Microbial metabolism in diverse environments	3.40517e-09	1.86	KFZ67_02865	29	K	K01580	E4.1.1.15, gadB, gadA, GAD; glutamate decarboxylase [EC:4.1.1.15]	Glutamate decarboxylase OS=Photobacterium damselae subsp. damselae OX=85581 GN=gadA PE=3 SV=1	gadA	3	-2.6209	3	K(1)MPQQEQSPQAIYQMIR	1	2.70225e-06	68.481	1	9.05945e-05	52.172	1	2.70225e-06
map01120 Microbial metabolism in diverse environments	3.40517e-09	1.86	KFZ67_02865	423	K	K01580	E4.1.1.15, gadB, gadA, GAD; glutamate decarboxylase [EC:4.1.1.15]	Glutamate decarboxylase OS=Photobacterium damselae subsp. damselae OX=85581 GN=gadA PE=3 SV=1	gadA	3	-1.5077	4	ILVK(1)QGFSQDLANLLIK	1	1.39452e-06	71.354	1	9.56032e-06	60.489	1	1.39452e-06
map01120 Microbial metabolism in diverse environments	3.40517e-09	1.86	KFZ67_02880	341	K	K00674	dapD; 2,3,4,5-tetrahydropyridine-2,6-dicarboxylate N-succinyltransferase [EC:2.3.1.117]	2,3,4,5-tetrahydropyridine-2,6-dicarboxylate N-succinyltransferase OS=Photobacterium damselae OX=38293 GN=dapD PE=3 SV=1	dapD	2	-0.37051	4	TAIELNSELHK(1)NN	1	1.13412e-11	110.08	1	5.9311e-07	95.417	1	1.13412e-11
map01120 Microbial metabolism in diverse environments	3.40517e-09	1.86	KFZ67_03145	136	K	K01962	accA; acetyl-CoA carboxylase carboxyl transferase subunit alpha [EC:6.4.1.2 2.1.3.15]	Acetyl-coenzyme A carboxylase carboxyl transferase subunit alpha OS=Photobacterium damselae subsp. damselae OX=85581 GN=accA PE=3 SV=1	accA	2	-0.23154	2	NFGMPK(1)PEGYR	1	0.000148501	81.017	1	0.000148501	81.017	1	0.000991815
map01120 Microbial metabolism in diverse environments	3.40517e-09	1.86	KFZ67_03440	153	K	K01714	dapA; 4-hydroxy-tetrahydrodipicolinate synthase [EC:4.3.3.7]	4-hydroxy-tetrahydrodipicolinate synthase OS=Photobacterium damselae OX=38293 GN=dapA PE=3 SV=1	dapA	2	-1.0287	3	LAK(1)LDNIIGIK	1	0.000328187	74.611	1	0.00475922	50.484	1	0.000328187
map01120 Microbial metabolism in diverse environments	3.40517e-09	1.86	KFZ67_03710	111	K	K00948	PRPS, prsA; ribose-phosphate pyrophosphokinase [EC:2.7.6.1]	Ribose-phosphate pyrophosphokinase OS=Photobacterium damselae OX=38293 GN=prs PE=3 SV=1	prs	3	-1.0229	4	VPITAK(1)VVADFLSNVGVDR	1	5.99068e-16	103.41	1	5.99068e-16	103.41	1	6.72431e-16
map01120 Microbial metabolism in diverse environments	3.40517e-09	1.86	KFZ67_03890	473	K	K13788	pta; phosphate acetyltransferase [EC:2.3.1.8]	Phosphate acetyltransferase OS=Photobacterium damselae OX=38293 GN=pta PE=3 SV=1	pta	2	-1.4276	2	GAK(1)GMTEVVAR	1	0.000200726	75.416	1	0.000200726	75.416	1	0.00315164
map01120 Microbial metabolism in diverse environments	3.40517e-09	1.86	KFZ67_03890	413	K	K13788	pta; phosphate acetyltransferase [EC:2.3.1.8]	Phosphate acetyltransferase OS=Photobacterium damselae OX=38293 GN=pta PE=3 SV=1	pta	2	-0.46396	3	TVK(1)AAAICAER	1	0.000208333	78.884	1	0.000564993	71.268	1	0.000208333
map01120 Microbial metabolism in diverse environments	3.40517e-09	1.86	KFZ67_03890	33	K	K13788	pta; phosphate acetyltransferase [EC:2.3.1.8]	Phosphate acetyltransferase OS=Photobacterium damselae OX=38293 GN=pta PE=3 SV=1	pta	2	-1.5228	2	VSFFK(1)PIAQPR	1	0.000240294	77.744	1	0.00355096	54.486	1	0.000240294
map01120 Microbial metabolism in diverse environments	3.40517e-09	1.86	KFZ67_03895	292	K	K00925	ackA; acetate kinase [EC:2.7.2.1]	Acetate kinase OS=Photobacterium damselae OX=38293 GN=ackA_1 PE=3 SV=1	ackA_1	2	-1.0422	6	FVEDNYGDK(1)EEATR	1	1.45219e-23	139.86	1	0.000558701	57.288	1	1.45219e-23
map01120 Microbial metabolism in diverse environments	3.40517e-09	1.86	KFZ67_03960	232	K	K00656	E2.3.1.54, pflD; formate C-acetyltransferase [EC:2.3.1.54]	Formate C-acetyltransferase OS=Photobacterium damselae OX=38293 GN=pflB PE=4 SV=1	pflB	2	-0.84425	3	ALGQIK(1)AMAAK	1	9.4841e-06	89.913	1	9.80932e-05	80.986	1	9.4841e-06
map01120 Microbial metabolism in diverse environments	3.40517e-09	1.86	KFZ67_03960	612	K	K00656	E2.3.1.54, pflD; formate C-acetyltransferase [EC:2.3.1.54]	Formate C-acetyltransferase OS=Photobacterium damselae OX=38293 GN=pflB PE=4 SV=1	pflB	3	0.038674	3	DAIPTQSILTITSNVVYGK(1)K	1	1.02046e-07	72.21	1	7.97813e-07	65.022	1	1.02046e-07
map01120 Microbial metabolism in diverse environments	3.40517e-09	1.86	KFZ67_03960	640	K	K00656	E2.3.1.54, pflD; formate C-acetyltransferase [EC:2.3.1.54]	Formate C-acetyltransferase OS=Photobacterium damselae OX=38293 GN=pflB PE=4 SV=1	pflB	2	2.0227	11	DEK(1)GAVASLTSVGK	1	5.80887e-13	115.68	1	1.27677e-06	86.497	1	5.80887e-13
map01120 Microbial metabolism in diverse environments	3.40517e-09	1.86	KFZ67_03960	718	K	K00656	E2.3.1.54, pflD; formate C-acetyltransferase [EC:2.3.1.54]	Formate C-acetyltransferase OS=Photobacterium damselae OX=38293 GN=pflB PE=4 SV=1	pflB	2	0.10825	3	ETLEDAVK(1)HPEK	1	0.000241457	74.987	1	0.00105583	62.088	1	0.000241457
map01120 Microbial metabolism in diverse environments	3.40517e-09	1.86	KFZ67_03960	722	K	K00656	E2.3.1.54, pflD; formate C-acetyltransferase [EC:2.3.1.54]	Formate C-acetyltransferase OS=Photobacterium damselae OX=38293 GN=pflB PE=4 SV=1	pflB	2	-0.44313	5	HPEK(1)YPQLTIR	1	7.84229e-10	120.55	1	7.39802e-07	105.03	1	7.84229e-10
map01120 Microbial metabolism in diverse environments	3.40517e-09	1.86	KFZ67_03960	159	K	K00656	E2.3.1.54, pflD; formate C-acetyltransferase [EC:2.3.1.54]	Formate C-acetyltransferase OS=Photobacterium damselae OX=38293 GN=pflB PE=4 SV=1	pflB	2	0.14041	13	K(1)SGVLTGLPDAYGR	1	3.29549e-80	206.49	1	3.29549e-80	206.49	1	9.0792e-42
map01120 Microbial metabolism in diverse environments	3.40517e-09	1.86	KFZ67_03960	121	K	K00656	E2.3.1.54, pflD; formate C-acetyltransferase [EC:2.3.1.54]	Formate C-acetyltransferase OS=Photobacterium damselae OX=38293 GN=pflB PE=4 SV=1	pflB	2	0.60346	5	MIEGSCK(1)VYGR	1	1.35601e-11	120.06	1	1.35601e-11	110.39	1	6.50711e-10
map01120 Microbial metabolism in diverse environments	3.40517e-09	1.86	KFZ67_04260	166	K	K00133	asd; aspartate-semialdehyde dehydrogenase [EC:1.2.1.11]	Aspartate-semialdehyde dehydrogenase OS=Photobacterium damsela subsp. piscicida OX=38294 GN=asd PE=3 SV=1	asd	2	-0.3557	3	INVATYQSVSGSGK(1)K	1	5.27389e-09	96.673	1	5.12514e-08	86.497	1	5.27389e-09
map01120 Microbial metabolism in diverse environments	3.40517e-09	1.86	KFZ67_04275	10	K	K01963	accD; acetyl-CoA carboxylase carboxyl transferase subunit beta [EC:6.4.1.2 2.1.3.15]	Acetyl-coenzyme A carboxylase carboxyl transferase subunit beta OS=Photobacterium damselae subsp. damselae OX=85581 GN=accD PE=3 SV=1	accD	2	0.1021	3	ILTK(1)SNIVTSR	1	1.12446e-09	119.74	1	9.70305e-07	103.43	1	1.12446e-09
map01120 Microbial metabolism in diverse environments	3.40517e-09	1.86	KFZ67_04535	261	K	K00134	GAPDH, gapA; glyceraldehyde 3-phosphate dehydrogenase [EC:1.2.1.12]	Glyceraldehyde-3-phosphate dehydrogenase OS=Photobacterium damselae OX=38293 GN=BST98_04565 PE=3 SV=1	BST98_04565	2	0.63932	5	AMK(1)DASEGSLK	1	8.3041e-07	101.39	1	8.3041e-07	101.39	1	1.17696e-06
map01120 Microbial metabolism in diverse environments	3.40517e-09	1.86	KFZ67_04535	269	K	K00134	GAPDH, gapA; glyceraldehyde 3-phosphate dehydrogenase [EC:1.2.1.12]	Glyceraldehyde-3-phosphate dehydrogenase OS=Photobacterium damselae OX=38293 GN=BST98_04565 PE=3 SV=1	BST98_04565	3	-1.3297	6	DASEGSLK(1)GILGYTEDAVVSTDFNGDTR	1	3.40921e-46	123.19	1	3.40921e-46	123.19	1	1.64781e-19
map01120 Microbial metabolism in diverse environments	3.40517e-09	1.86	KFZ67_04535	225	K	K00134	GAPDH, gapA; glyceraldehyde 3-phosphate dehydrogenase [EC:1.2.1.12]	Glyceraldehyde-3-phosphate dehydrogenase OS=Photobacterium damselae OX=38293 GN=BST98_04565 PE=3 SV=1	BST98_04565	3	-1.2794	3	AVGVVLPEVNGK(1)LTGMAFR	1	4.58562e-52	144.15	1	1.80574e-36	144.15	1	4.58562e-52
map01120 Microbial metabolism in diverse environments	3.40517e-09	1.86	KFZ67_04535	70	K	K00134	GAPDH, gapA; glyceraldehyde 3-phosphate dehydrogenase [EC:1.2.1.12]	Glyceraldehyde-3-phosphate dehydrogenase OS=Photobacterium damselae OX=38293 GN=BST98_04565 PE=3 SV=1	BST98_04565	3	1.451	5	FNGTVEVEGGNLIVNGK(1)TVR	1	6.36502e-22	110.33	1	6.36502e-22	110.33	1	1.6887e-12
map01120 Microbial metabolism in diverse environments	3.40517e-09	1.86	KFZ67_04535	258	K	K00134	GAPDH, gapA; glyceraldehyde 3-phosphate dehydrogenase [EC:1.2.1.12]	Glyceraldehyde-3-phosphate dehydrogenase OS=Photobacterium damselae OX=38293 GN=BST98_04565 PE=3 SV=1	BST98_04565	2	-0.93259	7	NGASYETICK(1)AMK	1	2.37952e-06	88.101	1	0.000101745	79.089	1	2.37952e-06
map01120 Microbial metabolism in diverse environments	3.40517e-09	1.86	KFZ67_04535	4	K	K00134	GAPDH, gapA; glyceraldehyde 3-phosphate dehydrogenase [EC:1.2.1.12]	Glyceraldehyde-3-phosphate dehydrogenase OS=Photobacterium damselae OX=38293 GN=BST98_04565 PE=3 SV=1	BST98_04565	2	1.2903	3	TIK(1)VGINGFGR	1	2.28342e-05	97.472	1	9.04359e-05	93.096	1	2.28342e-05
map01120 Microbial metabolism in diverse environments	3.40517e-09	1.86	KFZ67_04535	192	K	K00134	GAPDH, gapA; glyceraldehyde 3-phosphate dehydrogenase [EC:1.2.1.12]	Glyceraldehyde-3-phosphate dehydrogenase OS=Photobacterium damselae OX=38293 GN=BST98_04565 PE=3 SV=1	BST98_04565	2	-0.48363	5	TVDGPSAK(1)DWR	1	1.02847e-60	189.58	1	1.02847e-60	189.58	1	6.9966e-48
map01120 Microbial metabolism in diverse environments	3.40517e-09	1.86	KFZ67_04535	184	K	K00134	GAPDH, gapA; glyceraldehyde 3-phosphate dehydrogenase [EC:1.2.1.12]	Glyceraldehyde-3-phosphate dehydrogenase OS=Photobacterium damselae OX=38293 GN=BST98_04565 PE=3 SV=1	BST98_04565	3	-0.80049	11	VLNDNFGIESGLMTTVHATTATQK(1)TVDGPSAK	1	3.62959e-14	79.917	1	3.71691e-14	79.782	1	3.62959e-14
map01120 Microbial metabolism in diverse environments	3.40517e-09	1.86	KFZ67_04945	236	K	K00031	IDH1, IDH2, icd; isocitrate dehydrogenase [EC:1.1.1.42]	Isocitrate dehydrogenase [NADP] OS=Photobacterium damselae OX=38293 GN=icd PE=4 SV=1	icd	2	-0.79941	7	GNIMK(1)FTEGAFK	1	7.7128e-05	82.505	1	0.000119746	80.555	1	7.7128e-05
map01120 Microbial metabolism in diverse environments	3.40517e-09	1.86	KFZ67_04945	4	K	K00031	IDH1, IDH2, icd; isocitrate dehydrogenase [EC:1.1.1.42]	Isocitrate dehydrogenase [NADP] OS=Photobacterium damselae OX=38293 GN=icd PE=4 SV=1	icd	2	-1.5528	15	MDSK(1)VVVPVDGQK	1	5.06566e-07	94.688	1	2.3644e-06	88.163	1	5.06566e-07
map01120 Microbial metabolism in diverse environments	3.40517e-09	1.86	KFZ67_04945	274	K	K00031	IDH1, IDH2, icd; isocitrate dehydrogenase [EC:1.1.1.42]	Isocitrate dehydrogenase [NADP] OS=Photobacterium damselae OX=38293 GN=icd PE=4 SV=1	icd	2	0.61097	3	NPNTGK(1)EIVVK	1	5.63111e-07	106.26	1	5.63111e-07	106.26	1	3.40291e-06
map01120 Microbial metabolism in diverse environments	3.40517e-09	1.86	KFZ67_04945	56	K	K00031	IDH1, IDH2, icd; isocitrate dehydrogenase [EC:1.1.1.42]	Isocitrate dehydrogenase [NADP] OS=Photobacterium damselae OX=38293 GN=icd PE=4 SV=1	icd	2	0.5647	13	VVDAAVQK(1)AYGGDR	1	2.15272e-17	128.22	1	1.91715e-10	107.74	1	2.15272e-17
map01120 Microbial metabolism in diverse environments	3.40517e-09	1.86	KFZ67_04945	351	K	K00031	IDH1, IDH2, icd; isocitrate dehydrogenase [EC:1.1.1.42]	Isocitrate dehydrogenase [NADP] OS=Photobacterium damselae OX=38293 GN=icd PE=4 SV=1	icd	3	0.2696	3	YAGQDK(1)VNPGSLILSAEMMLR	1	9.1815e-28	120.73	1	9.1815e-28	120.73	1	1.16609e-17
map01120 Microbial metabolism in diverse environments	3.40517e-09	1.86	KFZ67_05230	9	K	K03778	ldhA; D-lactate dehydrogenase [EC:1.1.1.28]	D-lactate dehydrogenase OS=Photobacterium damselae subsp. damselae OX=85581 GN=ldhA PE=3 SV=1	ldhA	2	0.54705	6	VAVFSTK(1)NYDQK	1	7.59699e-06	89.301	1	0.000184412	77.597	1	7.59699e-06
map01120 Microbial metabolism in diverse environments	3.40517e-09	1.86	KFZ67_05990	219	K	K00873	PK, pyk; pyruvate kinase [EC:2.7.1.40]	Pyruvate kinase OS=Photobacterium damselae OX=38293 GN=BST98_06040 PE=3 SV=1	BST98_06040	2	0.4741	3	LAEEAGLQAK(1)LVAK	1	0.0002391	66.004	1	0.00111565	48.532	1	0.0002391
map01120 Microbial metabolism in diverse environments	3.40517e-09	1.86	KFZ67_06020	42	K	K00209	fabV, ter; enoyl-[acyl-carrier protein] reductase / trans-2-enoyl-CoA reductase (NAD+) [EC:1.3.1.9 1.3.1.44]	Enoyl-[acyl-carrier-protein] reductase [NADH] OS=Photobacterium damselae OX=38293 GN=fabV PE=3 SV=1	fabV	2	-1.0306	3	AQGPIANAPK(1)R	1	1.23408e-06	100.58	1	1.55546e-05	88.056	1	1.23408e-06
map01120 Microbial metabolism in diverse environments	3.40517e-09	1.86	KFZ67_06020	118	K	K00209	fabV, ter; enoyl-[acyl-carrier protein] reductase / trans-2-enoyl-CoA reductase (NAD+) [EC:1.3.1.9 1.3.1.44]	Enoyl-[acyl-carrier-protein] reductase [NADH] OS=Photobacterium damselae OX=38293 GN=fabV PE=3 SV=1	fabV	2	-1.2581	5	SLNGDAFSNEAK(1)QK	1	0.000367668	60.55	1	0.000367668	60.55	1	0.000650333
map01120 Microbial metabolism in diverse environments	3.40517e-09	1.86	KFZ67_06640	269	K	K02768	PTS-Fru-EIIA, fruB; PTS system, fructose-specific IIA component [EC:2.7.1.202]	Bifunctional PTS fructose transporter subunit IIA/HPr protein OS=Photobacterium damselae OX=38293 GN=BST98_06695 PE=4 SV=1	BST98_06695	2	-0.87551	3	IAELLASSEDK(1)VR	1	0.000541684	65.043	1	0.000541684	65.043	1	0.000541684
map01120 Microbial metabolism in diverse environments	3.40517e-09	1.86	KFZ67_06650	234	K	K02770	PTS-Fru-EIIC, fruA; PTS system, fructose-specific IIC component	PTS fructose transporter subunit EIIBC OS=Photobacterium damselae OX=38293 GN=BST98_06705 PE=4 SV=1	BST98_06705	3	0.47827	3	AFATATTYQQDAANSTAETK(1)EEK	1	2.42402e-07	68.42	1	0.000329538	43.841	1	2.42402e-07
map01120 Microbial metabolism in diverse environments	3.40517e-09	1.86	KFZ67_06650	76	K	K02770	PTS-Fru-EIIC, fruA; PTS system, fructose-specific IIC component	PTS fructose transporter subunit EIIBC OS=Photobacterium damselae OX=38293 GN=BST98_06705 PE=4 SV=1	BST98_06705	3	-0.295	3	K(1)VYVADIADCFENTK	1	7.39663e-06	71.935	1	7.39663e-06	71.935	1	2.85398e-05
map01120 Microbial metabolism in diverse environments	3.40517e-09	1.86	KFZ67_06650	198	K	K02770	PTS-Fru-EIIC, fruA; PTS system, fructose-specific IIC component	PTS fructose transporter subunit EIIBC OS=Photobacterium damselae OX=38293 GN=BST98_06705 PE=4 SV=1	BST98_06705	2	1.1141	3	LYK(1)TSTGAALK	1	0.000153618	80.834	1	0.00210855	59.265	1	0.000153618
map01120 Microbial metabolism in diverse environments	3.40517e-09	1.86	KFZ67_07570	177	K	K00124	fdoH, fdsB; formate dehydrogenase iron-sulfur subunit	4Fe-4S dicluster domain-containing protein OS=Photobacterium damselae OX=38293 GN=fdhB1 PE=4 SV=1	fdhB1	2	0.70839	3	ISEIYSK(1)R	1	1.54022e-32	161.02	1	7.85249e-08	121.09	1	1.54022e-32
map01120 Microbial metabolism in diverse environments	3.40517e-09	1.86	KFZ67_07575	131	K	K00123	fdoG, fdhF, fdwA; formate dehydrogenase major subunit [EC:1.17.1.9]	Formate dehydrogenase OS=Photobacterium damselae OX=38293 GN=fdnG PE=3 SV=1	fdnG	2	0.82363	3	LVNGK(1)WQR	1	4.11816e-11	128.57	1	0.00095075	89.55	1	4.11816e-11
map01120 Microbial metabolism in diverse environments	3.40517e-09	1.86	KFZ67_07575	736	K	K00123	fdoG, fdhF, fdwA; formate dehydrogenase major subunit [EC:1.17.1.9]	Formate dehydrogenase OS=Photobacterium damselae OX=38293 GN=fdnG PE=3 SV=1	fdnG	2	-1.8663	4	NWK(1)TDLSGGIQR	1	1.16524e-13	123.67	1	3.48046e-06	94.402	1	1.16524e-13
map01120 Microbial metabolism in diverse environments	3.40517e-09	1.86	KFZ67_07575	450	K	K00123	fdoG, fdhF, fdwA; formate dehydrogenase major subunit [EC:1.17.1.9]	Formate dehydrogenase OS=Photobacterium damselae OX=38293 GN=fdnG PE=3 SV=1	fdnG	2	-1.3933	8	PMNSK(1)GIPVSR	1	6.92879e-10	120.77	1	6.92879e-10	120.77	1	5.88167e-06
map01120 Microbial metabolism in diverse environments	3.40517e-09	1.86	KFZ67_08060	65	K	K03533	torD; TorA specific chaperone	Chaperone protein TorD OS=Photobacterium damselae subsp. damselae OX=85581 GN=torD_2 PE=3 SV=1	torD_2	2	0.18129	4	AALTK(1)LETR	1	5.93241e-05	102.01	1	5.93241e-05	102.01	1	0.00123372
map01120 Microbial metabolism in diverse environments	3.40517e-09	1.86	KFZ67_08835	349	K	K07811	torA; trimethylamine-N-oxide reductase (cytochrome c) [EC:1.7.2.3]	Trimethylamine N-oxide reductase I catalytic subunit OS=Photobacterium damselae OX=38293 GN=BST98_08850 PE=3 SV=1	BST98_08850	2	-0.30971	3	ADEIQK(1)FAR	1	2.27422e-05	107.06	1	0.00016393	96.229	1	2.27422e-05
map01120 Microbial metabolism in diverse environments	3.40517e-09	1.86	KFZ67_08835	179	K	K07811	torA; trimethylamine-N-oxide reductase (cytochrome c) [EC:1.7.2.3]	Trimethylamine N-oxide reductase I catalytic subunit OS=Photobacterium damselae OX=38293 GN=BST98_08850 PE=3 SV=1	BST98_08850	2	1.3139	2	AVGMYGNFIK(1)K	1	0.000886366	56.548	1	0.000886366	56.548	1	0.000886366
map01120 Microbial metabolism in diverse environments	3.40517e-09	1.86	KFZ67_08835	691	K	K07811	torA; trimethylamine-N-oxide reductase (cytochrome c) [EC:1.7.2.3]	Trimethylamine N-oxide reductase I catalytic subunit OS=Photobacterium damselae OX=38293 GN=BST98_08850 PE=3 SV=1	BST98_08850	3	-2.254	4	SDKYPLWLQSCHPPK(1)R	1	8.94597e-14	104.95	1	1.63515e-06	79.346	1	8.94597e-14
map01120 Microbial metabolism in diverse environments	3.40517e-09	1.86	KFZ67_08840	164	K	K03532	torC; trimethylamine-N-oxide reductase (cytochrome c), cytochrome c-type subunit TorC	Cytochrome c-type protein OS=Photobacterium damselae OX=38293 GN=torC PE=3 SV=1	torC	2	0.5929	3	AQVQMK(1)QAAAR	1	2.89482e-13	123.79	1	4.3238e-09	112.13	1	2.89482e-13
map01120 Microbial metabolism in diverse environments	3.40517e-09	1.86	KFZ67_09505	28	K	K00626	E2.3.1.9, atoB; acetyl-CoA C-acetyltransferase [EC:2.3.1.9]	Acetyl-CoA C-acetyltransferase OS=Photobacterium damselae OX=38293 GN=CTM90_05090 PE=3 SV=1	CTM90_05090	2	-0.19634	3	DQAAGK(1)IAAEVIK	1	0.00072526	60.861	1	0.000903038	58.885	1	0.00072526
map01120 Microbial metabolism in diverse environments	3.40517e-09	1.86	KFZ67_09505	345	K	K00626	E2.3.1.9, atoB; acetyl-CoA C-acetyltransferase [EC:2.3.1.9]	Acetyl-CoA C-acetyltransferase OS=Photobacterium damselae OX=38293 GN=CTM90_05090 PE=3 SV=1	CTM90_05090	4	1.9422	4	HQVEASDIIAK(1)ANLNGGAIALGHPLGASGNR	1	4.73063e-14	82.91	1	1.28533e-13	78.383	1	4.73063e-14
map01120 Microbial metabolism in diverse environments	3.40517e-09	1.86	KFZ67_09505	10	K	K00626	E2.3.1.9, atoB; acetyl-CoA C-acetyltransferase [EC:2.3.1.9]	Acetyl-CoA C-acetyltransferase OS=Photobacterium damselae OX=38293 GN=CTM90_05090 PE=3 SV=1	CTM90_05090	2	0.69125	6	VFIVAAK(1)R	1	7.27634e-17	143	1	3.68027e-11	128.57	1	7.27634e-17
map01120 Microbial metabolism in diverse environments	3.40517e-09	1.86	KFZ67_09945	262	K	K01902	sucD; succinyl-CoA synthetase alpha subunit [EC:6.2.1.5]	Succinate--CoA ligase [ADP-forming] subunit alpha OS=Photobacterium damselae subsp. damselae OX=85581 GN=sucD PE=3 SV=1	sucD	2	2.396	4	GTAEDK(1)FAALEAAGVR	1	7.66738e-06	70.451	1	1.19744e-05	67.646	1	7.66738e-06
map01120 Microbial metabolism in diverse environments	3.40517e-09	1.86	KFZ67_09945	243	K	K01902	sucD; succinyl-CoA synthetase alpha subunit [EC:6.2.1.5]	Succinate--CoA ligase [ADP-forming] subunit alpha OS=Photobacterium damselae subsp. damselae OX=85581 GN=sucD PE=3 SV=1	sucD	3	0.028747	4	PVVSYIAGVTAPPGK(1)R	1	2.43283e-05	59.864	1	2.43283e-05	59.864	1	5.41189e-05
map01120 Microbial metabolism in diverse environments	3.40517e-09	1.86	KFZ67_09945	228	K	K01902	sucD; succinyl-CoA synthetase alpha subunit [EC:6.2.1.5]	Succinate--CoA ligase [ADP-forming] subunit alpha OS=Photobacterium damselae subsp. damselae OX=85581 GN=sucD PE=3 SV=1	sucD	3	-0.51358	4	QHVTK(1)PVVSYIAGVTAPPGK	1	5.05431e-22	112.82	1	5.05431e-22	112.82	1	6.34281e-22
map01120 Microbial metabolism in diverse environments	3.40517e-09	1.86	KFZ67_09945	7	K	K01902	sucD; succinyl-CoA synthetase alpha subunit [EC:6.2.1.5]	Succinate--CoA ligase [ADP-forming] subunit alpha OS=Photobacterium damselae subsp. damselae OX=85581 GN=sucD PE=3 SV=1	sucD	2	0.6527	3	SILINK(1)DTK	1	1.02589e-07	119.68	1	1.02589e-07	119.68	1	1.02589e-07
map01120 Microbial metabolism in diverse environments	3.40517e-09	1.86	KFZ67_09950	380	K	K01903	sucC; succinyl-CoA synthetase beta subunit [EC:6.2.1.5]	Succinate--CoA ligase [ADP-forming] subunit beta OS=Photobacterium damselae OX=38293 GN=sucC PE=3 SV=1	sucC	3	-1.4071	3	LAESGLNIIAATSLTEAAEK(1)VVQAAEGK	1	3.00553e-35	111.4	1	3.00553e-35	111.4	1	2.43255e-26
map01120 Microbial metabolism in diverse environments	3.40517e-09	1.86	KFZ67_09950	79	K	K01903	sucC; succinyl-CoA synthetase beta subunit [EC:6.2.1.5]	Succinate--CoA ligase [ADP-forming] subunit beta OS=Photobacterium damselae OX=38293 GN=sucC PE=3 SV=1	sucC	3	-0.12504	5	TFSQQWLGK(1)HLVTYQTDANGQPVSK	1	1.0675e-23	98.918	1	1.0675e-23	98.918	1	3.55625e-11
map01120 Microbial metabolism in diverse environments	3.40517e-09	1.86	KFZ67_09955	287	K	K00658	DLST, sucB; 2-oxoglutarate dehydrogenase E2 component (dihydrolipoamide succinyltransferase) [EC:2.3.1.61]	Dihydrolipoyllysine-residue succinyltransferase component of 2-oxoglutarate dehydrogenase complex OS=Photobacterium damselae OX=38293 GN=BST98_09900 PE=3 SV=1	BST98_09900	2	-2.022	4	DCDK(1)LSLAEIEK	1	0.000551268	69.345	1	0.00118865	55.724	1	0.000551268
map01120 Microbial metabolism in diverse environments	3.40517e-09	1.86	KFZ67_09955	77	K	K00658	DLST, sucB; 2-oxoglutarate dehydrogenase E2 component (dihydrolipoamide succinyltransferase) [EC:2.3.1.61]	Dihydrolipoyllysine-residue succinyltransferase component of 2-oxoglutarate dehydrogenase complex OS=Photobacterium damselae OX=38293 GN=BST98_09900 PE=3 SV=1	BST98_09900	3	-3.0246	2	LK(1)VNAVAGEPTVDVPAGAEASPNKR	1	5.87317e-17	95.153	1	5.87317e-17	95.153	0.999997	2.21644e-05
map01120 Microbial metabolism in diverse environments	3.40517e-09	1.86	KFZ67_09955	99	K	K00658	DLST, sucB; 2-oxoglutarate dehydrogenase E2 component (dihydrolipoamide succinyltransferase) [EC:2.3.1.61]	Dihydrolipoyllysine-residue succinyltransferase component of 2-oxoglutarate dehydrogenase complex OS=Photobacterium damselae OX=38293 GN=BST98_09900 PE=3 SV=1	BST98_09900	3	-0.93464	4	VNAVAGEPTVDVPAGAEASPNK(1)R	1	4.15013e-11	81.977	1	1.31989e-10	74.192	1	4.15013e-11
map01120 Microbial metabolism in diverse environments	3.40517e-09	1.86	KFZ67_09960	923	K	K00164	OGDH, sucA; 2-oxoglutarate dehydrogenase E1 component [EC:1.2.4.2]	2-oxoglutarate dehydrogenase E1 component OS=Photobacterium damselae OX=38293 GN=sucA PE=4 SV=1	sucA	3	-2.8372	3	PASASPAVGYMSVHLK(1)QQK	1	9.33891e-13	96.447	1	9.33891e-13	96.447	1	3.49173e-12
map01120 Microbial metabolism in diverse environments	3.40517e-09	1.86	KFZ67_09970	267	K	K00239	sdhA, frdA; succinate dehydrogenase / fumarate reductase, flavoprotein subunit [EC:1.3.5.1 1.3.5.4]	Succinate dehydrogenase flavoprotein subunit OS=Photobacterium damselae OX=38293 GN=sdhA PE=3 SV=1	sdhA	2	-0.44072	3	GEGGYLLNK(1)DGER	1	0.00126184	54.898	1	0.00177311	49.216	1	0.00126184
map01120 Microbial metabolism in diverse environments	3.40517e-09	1.86	KFZ67_09970	320	K	K00239	sdhA, frdA; succinate dehydrogenase / fumarate reductase, flavoprotein subunit [EC:1.3.5.1 1.3.5.4]	Succinate dehydrogenase flavoprotein subunit OS=Photobacterium damselae OX=38293 GN=sdhA PE=3 SV=1	sdhA	2	1.5562	3	LDHLGK(1)EVLESR	1	6.18548e-05	83.204	1	6.18548e-05	83.204	1	0.00015781
map01120 Microbial metabolism in diverse environments	3.40517e-09	1.86	KFZ67_09970	124	K	K00239	sdhA, frdA; succinate dehydrogenase / fumarate reductase, flavoprotein subunit [EC:1.3.5.1 1.3.5.4]	Succinate dehydrogenase flavoprotein subunit OS=Photobacterium damselae OX=38293 GN=sdhA PE=3 SV=1	sdhA	2	0.056288	3	PFGGQSK(1)EFGGEQAAR	1	2.13975e-08	90.348	1	8.05754e-06	70.197	1	2.13975e-08
map01120 Microbial metabolism in diverse environments	3.40517e-09	1.86	KFZ67_09970	281	K	K00239	sdhA, frdA; succinate dehydrogenase / fumarate reductase, flavoprotein subunit [EC:1.3.5.1 1.3.5.4]	Succinate dehydrogenase flavoprotein subunit OS=Photobacterium damselae OX=38293 GN=sdhA PE=3 SV=1	sdhA	2	-1.3261	3	YAPNAK(1)DLAGR	1	0.00210855	59.265	1	0.00210855	59.265	1	0.00361625
map01120 Microbial metabolism in diverse environments	3.40517e-09	1.86	KFZ67_09985	103	K	K01647	CS, gltA; citrate synthase [EC:2.3.3.1]	Citrate synthase OS=Photobacterium damselae OX=38293 GN=gltA PE=3 SV=1	gltA	2	0.047713	3	AEYEK(1)FR	1	0.000224622	107.32	1	0.000224622	107.32	1	0.000448139
map01120 Microbial metabolism in diverse environments	3.40517e-09	1.86	KFZ67_09985	293	K	K01647	CS, gltA; citrate synthase [EC:2.3.3.1]	Citrate synthase OS=Photobacterium damselae OX=38293 GN=gltA PE=3 SV=1	gltA	3	-0.63837	3	AK(1)DKDDPFR	1	5.99189e-17	139.39	0.999836	8.26491e-05	98.254	1	5.99189e-17
map01120 Microbial metabolism in diverse environments	3.40517e-09	1.86	KFZ67_09985	222	K	K01647	CS, gltA; citrate synthase [EC:2.3.3.1]	Citrate synthase OS=Photobacterium damselae OX=38293 GN=gltA PE=3 SV=1	gltA	3	1.6511	4	ALDK(1)IFILHADHEQNASTSTVR	1	2.35004e-29	122.35	1	2.35004e-29	122.35	1	2.28984e-22
map01120 Microbial metabolism in diverse environments	3.40517e-09	1.86	KFZ67_10005	273	K	K01835	pgm; phosphoglucomutase [EC:5.4.2.2]	Phosphoglucomutase, alpha-D-glucose phosphate-specific OS=Photobacterium damselae OX=38293 GN=BST98_09950 PE=3 SV=1	BST98_09950	2	1.1601	6	FMSLDK(1)DGVIR	1	0.00024225	77.674	1	0.00597825	50.354	1	0.00024225
map01120 Microbial metabolism in diverse environments	3.40517e-09	1.86	KFZ67_10005	525	K	K01835	pgm; phosphoglucomutase [EC:5.4.2.2]	Phosphoglucomutase, alpha-D-glucose phosphate-specific OS=Photobacterium damselae OX=38293 GN=BST98_09950 PE=3 SV=1	BST98_09950	3	0.084306	3	GK(1)EHLALIEK	1	0.000584808	73.435	1	0.000764397	71.176	1	0.000584808
map01120 Microbial metabolism in diverse environments	3.40517e-09	1.86	KFZ67_10375	366	K	K01782	fadJ; 3-hydroxyacyl-CoA dehydrogenase / enoyl-CoA hydratase / 3-hydroxybutyryl-CoA epimerase [EC:1.1.1.35 4.2.1.17 5.1.2.3]	Fatty acid oxidation complex subunit alpha OS=Photobacterium damselae OX=38293 GN=BST98_10320 PE=3 SV=1	BST98_10320	2	-0.46309	3	IISK(1)AQLQK	1	0.000320728	92.838	1	0.00155125	78.113	1	0.000320728
map01120 Microbial metabolism in diverse environments	3.40517e-09	1.86	KFZ67_10375	232	K	K01782	fadJ; 3-hydroxyacyl-CoA dehydrogenase / enoyl-CoA hydratase / 3-hydroxybutyryl-CoA epimerase [EC:1.1.1.35 4.2.1.17 5.1.2.3]	Fatty acid oxidation complex subunit alpha OS=Photobacterium damselae OX=38293 GN=BST98_10320 PE=3 SV=1	BST98_10320	2	0.50631	3	SVVFDQAK(1)K	1	0.00393358	61.78	1	0.00484429	59.908	1	0.00393358
map01120 Microbial metabolism in diverse environments	3.40517e-09	1.86	KFZ67_10775	149	K	K01885	EARS, gltX; glutamyl-tRNA synthetase [EC:6.1.1.17]	Glutamate--tRNA ligase OS=Photobacterium damselae OX=38293 GN=gltX PE=3 SV=1	gltX	2	1.6583	3	NPK(1)EGTVVFDDK	1	1.23286e-06	87.831	1	1.23286e-06	87.831	1	0.000137476
map01120 Microbial metabolism in diverse environments	3.40517e-09	1.86	KFZ67_10805	137	K	K01738	cysK; cysteine synthase [EC:2.5.1.47]	Cysteine synthase OS=Photobacterium damselae OX=38293 GN=cysK PE=3 SV=1	cysK	4	0.37114	3	AEEIVASNPSK(1)YLLLQQFNNPANPEIHEK	1	3.10417e-19	94.275	1	3.10417e-19	94.275	1	6.96964e-14
map01120 Microbial metabolism in diverse environments	3.40517e-09	1.86	KFZ67_10805	105	K	K01738	cysK; cysteine synthase [EC:2.5.1.47]	Cysteine synthase OS=Photobacterium damselae OX=38293 GN=cysK PE=3 SV=1	cysK	2	1.8253	3	LLK(1)ALGANLELTEAAK	1	2.70028e-08	88.385	1	5.82873e-06	70.197	1	2.70028e-08
map01120 Microbial metabolism in diverse environments	3.40517e-09	1.86	KFZ67_10865	162	K	K02568	napB; cytochrome c-type protein NapB	Periplasmic nitrate reductase, electron transfer subunit OS=Photobacterium damsela subsp. piscicida OX=38294 GN=BEI67_10510 PE=3 SV=1	BEI67_10510	2	2.343	3	PLVGNQFK(1)R	1	1.30679e-24	155.75	1	1.30679e-24	155.75	1	4.13721e-17
map01120 Microbial metabolism in diverse environments	3.40517e-09	1.86	KFZ67_10870	446	K	K02567	napA; periplasmic nitrate reductase NapA [EC:1.7.99.-]	Periplasmic nitrate reductase OS=Photobacterium damselae OX=38293 GN=napA PE=3 SV=1	napA	2	-0.5057	3	AIAEK(1)IWK	1	0.00984472	64.265	1	0.00984472	64.265	1	0.00984472
map01120 Microbial metabolism in diverse environments	3.40517e-09	1.86	KFZ67_10870	439	K	K02567	napA; periplasmic nitrate reductase NapA [EC:1.7.99.-]	Periplasmic nitrate reductase OS=Photobacterium damselae OX=38293 GN=napA PE=3 SV=1	napA	3	-0.10542	6	LPADMVVANPK(1)HR	1	5.03267e-05	80.69	1	8.11315e-05	77.597	1	5.03267e-05
map01120 Microbial metabolism in diverse environments	3.40517e-09	1.86	KFZ67_11120	345	K	K00600	glyA, SHMT; glycine hydroxymethyltransferase [EC:2.1.2.1]	Serine hydroxymethyltransferase OS=Photobacterium damsela subsp. piscicida OX=38294 GN=glyA PE=3 SV=1	glyA	3	-0.038057	4	EADAALGAANITVNK(1)NSVPNDPR	1	6.56601e-45	143.4	1	6.56601e-45	143.4	1	2.16302e-35
map01120 Microbial metabolism in diverse environments	3.40517e-09	1.86	KFZ67_11120	330	K	K00600	glyA, SHMT; glycine hydroxymethyltransferase [EC:2.1.2.1]	Serine hydroxymethyltransferase OS=Photobacterium damsela subsp. piscicida OX=38294 GN=glyA PE=3 SV=1	glyA	3	-0.81801	3	GITGK(1)EADAALGAANITVNK	1	1.61841e-10	82.482	1	1.61841e-10	82.482	1	6.2005e-10
map01120 Microbial metabolism in diverse environments	3.40517e-09	1.86	KFZ67_11120	325	K	K00600	glyA, SHMT; glycine hydroxymethyltransferase [EC:2.1.2.1]	Serine hydroxymethyltransferase OS=Photobacterium damsela subsp. piscicida OX=38294 GN=glyA PE=3 SV=1	glyA	3	-0.2402	3	IVSGSTENHLFLVDLIDK(1)GITGK	1	1.83922e-11	83.826	1	2.09806e-07	69.071	1	1.83922e-11
map01120 Microbial metabolism in diverse environments	3.40517e-09	1.86	KFZ67_11120	410	K	K00600	glyA, SHMT; glycine hydroxymethyltransferase [EC:2.1.2.1]	Serine hydroxymethyltransferase OS=Photobacterium damsela subsp. piscicida OX=38294 GN=glyA PE=3 SV=1	glyA	2	0.7709	4	VLEICK(1)R	1	1.18019e-06	119.57	1	1.18019e-06	119.57	1	0.000192935
map01120 Microbial metabolism in diverse environments	3.40517e-09	1.86	KFZ67_11120	62	K	K00600	glyA, SHMT; glycine hydroxymethyltransferase [EC:2.1.2.1]	Serine hydroxymethyltransferase OS=Photobacterium damsela subsp. piscicida OX=38294 GN=glyA PE=3 SV=1	glyA	2	-0.91322	5	YAEGYPGK(1)R	1	7.58099e-08	120.15	1	1.51613e-07	117.89	1	7.58099e-08
map01120 Microbial metabolism in diverse environments	3.40517e-09	1.86	KFZ67_11160	120	K	K00121	frmA, ADH5, adhC; S-(hydroxymethyl)glutathione dehydrogenase / alcohol dehydrogenase [EC:1.1.1.284 1.1.1.1]	S-(hydroxymethyl)glutathione dehydrogenase OS=Photobacterium damselae OX=38293 GN=frmA PE=3 SV=1	frmA	2	-1.8535	10	ETQGK(1)GLMPDGTTR	1	0.000119643	71.781	1	0.000334127	61.409	1	0.000119643
map01120 Microbial metabolism in diverse environments	3.40517e-09	1.86	KFZ67_11160	323	K	K00121	frmA, ADH5, adhC; S-(hydroxymethyl)glutathione dehydrogenase / alcohol dehydrogenase [EC:1.1.1.284 1.1.1.1]	S-(hydroxymethyl)glutathione dehydrogenase OS=Photobacterium damselae OX=38293 GN=frmA PE=3 SV=1	frmA	2	-0.41474	4	GSAFGGVK(1)GR	1	1.39655e-07	113.67	1	0.000179385	90.15	1	1.39655e-07
map01120 Microbial metabolism in diverse environments	3.40517e-09	1.86	KFZ67_11160	107	K	K00121	frmA, ADH5, adhC; S-(hydroxymethyl)glutathione dehydrogenase / alcohol dehydrogenase [EC:1.1.1.284 1.1.1.1]	S-(hydroxymethyl)glutathione dehydrogenase OS=Photobacterium damselae OX=38293 GN=frmA PE=3 SV=1	frmA	2	0.21654	5	SGK(1)TNLCQAVR	1	3.90278e-27	151.66	1	3.90278e-27	151.66	1	2.3838e-19
map01120 Microbial metabolism in diverse environments	3.40517e-09	1.86	KFZ67_11160	9	K	K00121	frmA, ADH5, adhC; S-(hydroxymethyl)glutathione dehydrogenase / alcohol dehydrogenase [EC:1.1.1.284 1.1.1.1]	S-(hydroxymethyl)glutathione dehydrogenase OS=Photobacterium damselae OX=38293 GN=frmA PE=3 SV=1	frmA	3	-0.30791	5	SK(1)AAVAWGPNQPLSIEEVDVMLPR	1	1.08452e-51	135.76	1	1.57407e-33	121.38	1	1.08452e-51
map01120 Microbial metabolism in diverse environments	3.40517e-09	1.86	KFZ67_11340	392	K	K01637	E4.1.3.1, aceA; isocitrate lyase [EC:4.1.3.1]	Isocitrate lyase OS=Photobacterium damselae OX=38293 GN=aceA PE=4 SV=1	aceA	3	0.27967	13	REFESADK(1)GYTFVAHQQEVGTGYFDK	1	6.53721e-64	157.24	1	2.20174e-52	143.27	1	6.53721e-64
map01120 Microbial metabolism in diverse environments	3.40517e-09	1.86	KFZ67_11340	326	K	K01637	E4.1.3.1, aceA; isocitrate lyase [EC:4.1.3.1]	Isocitrate lyase OS=Photobacterium damselae OX=38293 GN=aceA PE=4 SV=1	aceA	3	0.076561	8	FAEAIHAQYPDQILAYNCSPSFNWEK(1)NLDAK	1	3.88248e-36	118.11	1	5.27039e-36	116.57	1	3.88248e-36
map01120 Microbial metabolism in diverse environments	3.40517e-09	1.86	KFZ67_11340	54	K	K01637	E4.1.3.1, aceA; isocitrate lyase [EC:4.1.3.1]	Isocitrate lyase OS=Photobacterium damselae OX=38293 GN=aceA PE=4 SV=1	aceA	2	-0.11787	12	GADK(1)LWDLINGSAK	1	2.13262e-10	107.46	1	9.2498e-07	89.624	1	2.13262e-10
map01120 Microbial metabolism in diverse environments	3.40517e-09	1.86	KFZ67_11340	64	K	K01637	E4.1.3.1, aceA; isocitrate lyase [EC:4.1.3.1]	Isocitrate lyase OS=Photobacterium damselae OX=38293 GN=aceA PE=4 SV=1	aceA	2	0.46944	11	LWDLINGSAK(1)K	1	3.21812e-09	113.22	1	3.4529e-09	113.22	1	3.21812e-09
map01120 Microbial metabolism in diverse environments	3.40517e-09	1.86	KFZ67_11340	193	K	K01637	E4.1.3.1, aceA; isocitrate lyase [EC:4.1.3.1]	Isocitrate lyase OS=Photobacterium damselae OX=38293 GN=aceA PE=4 SV=1	aceA	3	0.5808	17	HMIEAGAAGVHFEDQLASVK(1)K	1	3.27818e-44	142.43	1	3.27818e-44	142.43	1	2.72949e-36
map01120 Microbial metabolism in diverse environments	3.40517e-09	1.86	KFZ67_11340	300	K	K01637	E4.1.3.1, aceA; isocitrate lyase [EC:4.1.3.1]	Isocitrate lyase OS=Photobacterium damselae OX=38293 GN=aceA PE=4 SV=1	aceA	3	-1.0828	11	K(1)FAEAIHAQYPDQILAYNCSPSFNWEK	1	7.91085e-34	120.15	1	2.99711e-24	100.24	1	7.91085e-34
map01120 Microbial metabolism in diverse environments	3.40517e-09	1.86	KFZ67_11340	65	K	K01637	E4.1.3.1, aceA; isocitrate lyase [EC:4.1.3.1]	Isocitrate lyase OS=Photobacterium damselae OX=38293 GN=aceA PE=4 SV=1	aceA	3	-1.2379	4	K(1)GYVNCLGALTGGQAVQQAK	1	3.01126e-55	164.93	1	8.73608e-45	147.09	1	3.01126e-55
map01120 Microbial metabolism in diverse environments	3.40517e-09	1.86	KFZ67_11340	250	K	K01637	E4.1.3.1, aceA; isocitrate lyase [EC:4.1.3.1]	Isocitrate lyase OS=Photobacterium damselae OX=38293 GN=aceA PE=4 SV=1	aceA	3	0.95001	7	TDANAADLLTSDCDPYDK(1)DFIVGER	1	1.12642e-23	98.299	1	3.23986e-07	61.417	1	1.12642e-23
map01120 Microbial metabolism in diverse environments	3.40517e-09	1.86	KFZ67_11340	212	K	K01637	E4.1.3.1, aceA; isocitrate lyase [EC:4.1.3.1]	Isocitrate lyase OS=Photobacterium damselae OX=38293 GN=aceA PE=4 SV=1	aceA	2	-2.4183	3	VLVPTQEAVQK(1)LVAAR	1	9.54334e-13	108.58	1	5.31996e-06	71.98	1	9.54334e-13
map01120 Microbial metabolism in diverse environments	3.40517e-09	1.86	KFZ67_11345	156	K	K01638	aceB, glcB; malate synthase [EC:2.3.3.9]	Malate synthase OS=Photobacterium damselae OX=38293 GN=aceB PE=3 SV=1	aceB	3	0.70886	6	HYQLK(1)EDPAVLICR	1	1.58213e-23	136.24	1	2.2046e-17	125.53	1	1.58213e-23
map01120 Microbial metabolism in diverse environments	3.40517e-09	1.86	KFZ67_11345	352	K	K01638	aceB, glcB; malate synthase [EC:2.3.3.9]	Malate synthase OS=Photobacterium damselae OX=38293 GN=aceB PE=3 SV=1	aceB	4	-1.2304	2	IQTDK(1)SLEAHNGHDGTWVAHPGLADTAR	1	1.64713e-07	59.372	1	1.64713e-07	59.372	1	4.84233e-07
map01120 Microbial metabolism in diverse environments	3.40517e-09	1.86	KFZ67_11345	347	K	K01638	aceB, glcB; malate synthase [EC:2.3.3.9]	Malate synthase OS=Photobacterium damselae OX=38293 GN=aceB PE=3 SV=1	aceB	2	1.836	6	NAWVLNK(1)IQTDK	1	1.25726e-11	122.34	1	1.25726e-11	122.34	1	3.1641e-10
map01120 Microbial metabolism in diverse environments	3.40517e-09	1.86	KFZ67_12030	93	K	K00215	dapB; 4-hydroxy-tetrahydrodipicolinate reductase [EC:1.17.1.8]	4-hydroxy-tetrahydrodipicolinate reductase OS=Photobacterium damselae OX=38293 GN=dapB PE=3 SV=1	dapB	3	0.033065	6	AHQK(1)AIVIGTTGFTEQER	1	1.20668e-15	102.55	1	1.10197e-11	88.637	1	1.20668e-15
map01120 Microbial metabolism in diverse environments	3.40517e-09	1.86	KFZ67_12220	266	K	K01733	thrC; threonine synthase [EC:4.2.3.1]	Threonine synthase OS=Photobacterium damselae OX=38293 GN=BST98_12205 PE=4 SV=1	BST98_12205	2	0.3896	3	AIGLPVK(1)R	1	0.000849655	89.55	1	0.0030927	79.469	1	0.000849655
map01120 Microbial metabolism in diverse environments	3.40517e-09	1.86	KFZ67_12730	434	K	K00873	PK, pyk; pyruvate kinase [EC:2.7.1.40]	Pyruvate kinase OS=Photobacterium damsela subsp. piscicida OX=38294 GN=pykF PE=3 SV=1	pykF	2	0.11361	2	GK(1)ELALETGLGAK	1	0.000105945	78.814	1	0.000105945	78.814	1	0.000137832
map01120 Microbial metabolism in diverse environments	3.40517e-09	1.86	KFZ67_12730	360	K	K00873	PK, pyk; pyruvate kinase [EC:2.7.1.40]	Pyruvate kinase OS=Photobacterium damsela subsp. piscicida OX=38294 GN=pykF PE=3 SV=1	pykF	2	1.4009	5	ITEAVCK(1)GAVDTAEK	1	1.75211e-22	131.86	1	1.75211e-22	131.86	1	1.90816e-17
map01120 Microbial metabolism in diverse environments	3.40517e-09	1.86	KFZ67_12730	389	K	K00873	PK, pyk; pyruvate kinase [EC:2.7.1.40]	Pyruvate kinase OS=Photobacterium damsela subsp. piscicida OX=38294 GN=pykF PE=3 SV=1	pykF	2	-1.2335	3	K(1)YFPTAR	1	4.84642e-11	133.81	1	4.84642e-11	133.81	1	2.52483e-10
map01120 Microbial metabolism in diverse environments	3.40517e-09	1.86	KFZ67_12730	59	K	K00873	PK, pyk; pyruvate kinase [EC:2.7.1.40]	Pyruvate kinase OS=Photobacterium damsela subsp. piscicida OX=38294 GN=pykF PE=3 SV=1	pykF	2	0.23093	3	NTGK(1)QLAILLDTK	1	0.00035064	69.516	1	0.00160987	51.03	1	0.00035064
map01120 Microbial metabolism in diverse environments	3.40517e-09	1.86	KFZ67_12890	142	K	K00024	mdh; malate dehydrogenase [EC:1.1.1.37]	Malate dehydrogenase OS=Photobacterium damselae subsp. damselae OX=85581 GN=mdh PE=3 SV=1	mdh	2	-2.2154	3	K(1)LFGITTLDVIR	1	1.83179e-27	149.23	1	1.83179e-27	149.23	1	4.2682e-20
map01120 Microbial metabolism in diverse environments	3.40517e-09	1.86	KFZ67_12890	162	K	K00024	mdh; malate dehydrogenase [EC:1.1.1.37]	Malate dehydrogenase OS=Photobacterium damselae subsp. damselae OX=85581 GN=mdh PE=3 SV=1	mdh	2	0.97471	3	SETFVAELK(1)GK	1	0.000294285	75.819	1	0.00106502	66.267	1	0.000294285
map01120 Microbial metabolism in diverse environments	3.40517e-09	1.86	KFZ67_12890	21	K	K00024	mdh; malate dehydrogenase [EC:1.1.1.37]	Malate dehydrogenase OS=Photobacterium damselae subsp. damselae OX=85581 GN=mdh PE=3 SV=1	mdh	3	-0.24109	3	VAVIGAAGGIGQALALLLK(1)NR	1	2.19203e-53	148.41	1	2.23028e-27	118.31	1	2.19203e-53
map01120 Microbial metabolism in diverse environments	3.40517e-09	1.86	KFZ67_12920	223	K	K03841	FBP, fbp; fructose-1,6-bisphosphatase I [EC:3.1.3.11]	Fructose-1,6-bisphosphatase class 1 OS=Photobacterium damsela subsp. piscicida OX=38294 GN=fbp PE=3 SV=1	fbp	2	-0.01092	3	FPQGIK(1)QYIK	1	1.92789e-05	104.39	1	9.56732e-05	94.804	1	1.92789e-05
map01120 Microbial metabolism in diverse environments	3.40517e-09	1.86	KFZ67_12920	325	K	K03841	FBP, fbp; fructose-1,6-bisphosphatase I [EC:3.1.3.11]	Fructose-1,6-bisphosphatase class 1 OS=Photobacterium damsela subsp. piscicida OX=38294 GN=fbp PE=3 SV=1	fbp	2	-1.9314	5	NMVK(1)QVEDYLER	1	4.27257e-07	102.73	1	8.51511e-06	88.163	1	4.27257e-07
map01120 Microbial metabolism in diverse environments	3.40517e-09	1.86	KFZ67_12920	33	K	K03841	FBP, fbp; fructose-1,6-bisphosphatase I [EC:3.1.3.11]	Fructose-1,6-bisphosphatase class 1 OS=Photobacterium damsela subsp. piscicida OX=38294 GN=fbp PE=3 SV=1	fbp	3	-2.1513	2	QNDFPHASGELSSLLGSIK(1)LAAK	1	5.65823e-07	61.963	1	5.65823e-07	61.963	1	2.83731e-05
map01120 Microbial metabolism in diverse environments	3.40517e-09	1.86	KFZ67_13105	7	K	K00860	cysC; adenylylsulfate kinase [EC:2.7.1.25]	Adenylyl-sulfate kinase OS=Photobacterium damselae OX=38293 GN=cysC PE=3 SV=1	cysC	3	-0.27079	4	TSVLVK(1)DNVIWHQHSVNK	1	2.59995e-09	73.953	1	2.42245e-07	70.802	1	2.59995e-09
map01120 Microbial metabolism in diverse environments	3.40517e-09	1.86	KFZ67_13115	362	K	K00956	cysN; sulfate adenylyltransferase subunit 1 [EC:2.7.7.4]	Sulfate adenylyltransferase subunit 1 OS=Photobacterium damselae OX=38293 GN=cysN PE=3 SV=1	cysN	3	1.2031	5	IAGNK(1)TQGQVIGFEHQIDINK	1	5.92562e-11	82.635	1	6.81326e-07	64.522	1	5.92562e-11
map01120 Microbial metabolism in diverse environments	3.40517e-09	1.86	KFZ67_13115	459	K	K00956	cysN; sulfate adenylyltransferase subunit 1 [EC:2.7.7.4]	Sulfate adenylyltransferase subunit 1 OS=Photobacterium damselae OX=38293 GN=cysN PE=3 SV=1	cysN	3	-0.477	3	K(1)HFPHWNSSDISK	1	0.000240764	70.563	1	0.000278187	70.438	1	0.000240764
map01120 Microbial metabolism in diverse environments	3.40517e-09	1.86	KFZ67_13115	24	K	K00956	cysN; sulfate adenylyltransferase subunit 1 [EC:2.7.7.4]	Sulfate adenylyltransferase subunit 1 OS=Photobacterium damselae OX=38293 GN=cysN PE=3 SV=1	cysN	4	-0.41155	3	MNHAIQQQVAELGIEAYLDQHQNK(1)SLLR	1	7.1067e-36	119.87	1	3.02955e-35	111.55	1	7.1067e-36
map01120 Microbial metabolism in diverse environments	3.40517e-09	1.86	KFZ67_13115	278	K	K00956	cysN; sulfate adenylyltransferase subunit 1 [EC:2.7.7.4]	Sulfate adenylyltransferase subunit 1 OS=Photobacterium damselae OX=38293 GN=cysN PE=3 SV=1	cysN	2	-0.79996	2	VK(1)VLPSEK	1	5.78584e-05	105.1	1	0.000131841	98.582	1	5.78584e-05
map01120 Microbial metabolism in diverse environments	3.40517e-09	1.86	KFZ67_13115	284	K	K00956	cysN; sulfate adenylyltransferase subunit 1 [EC:2.7.7.4]	Sulfate adenylyltransferase subunit 1 OS=Photobacterium damselae OX=38293 GN=cysN PE=3 SV=1	cysN	2	0.8084	4	VLPSEK(1)ESYIER	1	9.67751e-14	125.54	1	9.67751e-14	125.54	1	1.02819e-05
map01120 Microbial metabolism in diverse environments	3.40517e-09	1.86	KFZ67_13115	105	K	K00956	cysN; sulfate adenylyltransferase subunit 1 [EC:2.7.7.4]	Sulfate adenylyltransferase subunit 1 OS=Photobacterium damselae OX=38293 GN=cysN PE=3 SV=1	cysN	2	0.17473	2	YFSTQK(1)R	1	0.000192935	107.43	1	0.000192935	107.43	1	0.000263532
map01120 Microbial metabolism in diverse environments	3.40517e-09	1.86	KFZ67_13120	115	K	K00957	cysD; sulfate adenylyltransferase subunit 2 [EC:2.7.7.4]	Sulfate adenylyltransferase subunit 2 OS=Photobacterium damselae OX=38293 GN=cysD PE=3 SV=1	cysD	2	2.5314	5	HTDIMK(1)TQALK	1	2.56317e-27	154.28	1	2.56317e-27	154.28	1	2.47953e-13
map01120 Microbial metabolism in diverse environments	3.40517e-09	1.86	KFZ67_13120	120	K	K00957	cysD; sulfate adenylyltransferase subunit 2 [EC:2.7.7.4]	Sulfate adenylyltransferase subunit 2 OS=Photobacterium damselae OX=38293 GN=cysD PE=3 SV=1	cysD	3	1.5478	3	TQALK(1)QALNQYGFDAAFGGAR	1	5.69251e-27	111.93	1	5.69251e-27	111.93	1	4.02357e-21
map01120 Microbial metabolism in diverse environments	3.40517e-09	1.86	KFZ67_13120	82	K	K00957	cysD; sulfate adenylyltransferase subunit 2 [EC:2.7.7.4]	Sulfate adenylyltransferase subunit 2 OS=Photobacterium damselae OX=38293 GN=cysD PE=3 SV=1	cysD	3	0.25407	5	K(1)YGFELLVHK	1	0.000633938	73.499	1	0.000633938	73.499	1	0.000633938
map01120 Microbial metabolism in diverse environments	3.40517e-09	1.86	KFZ67_13120	238	K	K00957	cysD; sulfate adenylyltransferase subunit 2 [EC:2.7.7.4]	Sulfate adenylyltransferase subunit 2 OS=Photobacterium damselae OX=38293 GN=cysD PE=3 SV=1	cysD	2	-1.8278	7	MPLTDSDK(1)VEQK	1	8.62978e-06	88.021	1	0.000374447	71.888	1	8.62978e-06
map01120 Microbial metabolism in diverse environments	3.40517e-09	1.86	KFZ67_13120	177	K	K00957	cysD; sulfate adenylyltransferase subunit 2 [EC:2.7.7.4]	Sulfate adenylyltransferase subunit 2 OS=Photobacterium damselae OX=38293 GN=cysD PE=3 SV=1	cysD	2	-0.80529	5	TYNGQINK(1)GESIR	1	7.87231e-17	124.07	1	1.19737e-12	116.19	1	7.87231e-17
map01120 Microbial metabolism in diverse environments	3.40517e-09	1.86	KFZ67_13160	175	K	K00381	cysI; sulfite reductase (NADPH) hemoprotein beta-component [EC:1.8.1.2]	Sulfite reductase [NADPH] hemoprotein beta-component OS=Photobacterium damsela subsp. piscicida OX=38294 GN=cysI PE=3 SV=1	cysI	2	0.50203	3	ISEHLLPK(1)TR	1	0.000759054	74.53	1	0.0123857	46.73	1	0.000759054
map01120 Microbial metabolism in diverse environments	3.40517e-09	1.86	KFZ67_13160	156	K	K00381	cysI; sulfite reductase (NADPH) hemoprotein beta-component [EC:1.8.1.2]	Sulfite reductase [NADPH] hemoprotein beta-component OS=Photobacterium damsela subsp. piscicida OX=38294 GN=cysI PE=3 SV=1	cysI	3	1.1793	4	NVLCTSNPIESK(1)LHQQAYEWAAK	1	5.26242e-06	60.133	1	5.26242e-06	60.133	1	6.69054e-05
map01120 Microbial metabolism in diverse environments	3.40517e-09	1.86	KFZ67_13160	299	K	K00381	cysI; sulfite reductase (NADPH) hemoprotein beta-component [EC:1.8.1.2]	Sulfite reductase [NADPH] hemoprotein beta-component OS=Photobacterium damsela subsp. piscicida OX=38294 GN=cysI PE=3 SV=1	cysI	2	-0.47429	2	TK(1)YTLDR	1	0.0404102	47.849	1	0.0404102	47.849	1	0.0404102
map01120 Microbial metabolism in diverse environments	3.40517e-09	1.86	KFZ67_13165	348	K	K00380	cysJ; sulfite reductase (NADPH) flavoprotein alpha-component [EC:1.8.1.2]	Sulfite reductase [NADPH] flavoprotein alpha-component OS=Photobacterium damselae OX=38293 GN=BST98_13075 PE=4 SV=1	BST98_13075	2	0.77533	3	YAELSQSK(1)R	1	5.8417e-06	109.29	1	0.000444	89.029	1	5.8417e-06
map01120 Microbial metabolism in diverse environments	3.40517e-09	1.86	KFZ67_13205	141	K	K01810	GPI, pgi; glucose-6-phosphate isomerase [EC:5.3.1.9]	Glucose-6-phosphate isomerase OS=Photobacterium damselae OX=38293 GN=pgi PE=3 SV=1	pgi	2	0.37615	4	IVSGEWK(1)GYTGK	1	0.00170536	57.792	1	0.00170536	57.792	1	0.00279747
map01120 Microbial metabolism in diverse environments	3.40517e-09	1.86	KFZ67_13470	258	K	K00244	frdA; fumarate reductase flavoprotein subunit [EC:1.3.5.4]	Fumarate reductase flavoprotein subunit OS=Photobacterium damselae OX=38293 GN=CTM90_17535 PE=3 SV=1	CTM90_17535	2	-1.6945	6	GEGGIIVNK(1)NGYR	1	2.09353e-12	111.52	1	0.00033581	72.29	1	2.09353e-12
map01120 Microbial metabolism in diverse environments	3.40517e-09	1.86	KFZ67_13470	591	K	K00244	frdA; fumarate reductase flavoprotein subunit [EC:1.3.5.4]	Fumarate reductase flavoprotein subunit OS=Photobacterium damselae OX=38293 GN=CTM90_17535 PE=3 SV=1	CTM90_17535	3	0.13956	2	LYGAAAEEAAAK(1)EAAEQQEK	1	3.54712e-10	78.78	1	3.41824e-07	69.422	1	3.54712e-10
map01120 Microbial metabolism in diverse environments	3.40517e-09	1.86	KFZ67_13575	367	K	K01895	ACSS1_2, acs; acetyl-CoA synthetase [EC:6.2.1.1]	Acetyl-coenzyme A synthetase OS=Photobacterium damselae OX=38293 GN=acs PE=3 SV=1	acs	2	0.10714	16	ALMAK(1)GDEAIVDTSR	1	6.73423e-22	123.76	1	6.73423e-22	123.76	1	1.50243e-18
map01120 Microbial metabolism in diverse environments	3.40517e-09	1.86	KFZ67_13575	640	K	K01895	ACSS1_2, acs; acetyl-CoA synthetase [EC:6.2.1.1]	Acetyl-coenzyme A synthetase OS=Photobacterium damselae OX=38293 GN=acs PE=3 SV=1	acs	3	0.2204	4	IATGDTSNLGDTSTLADPSVVEK(1)LIAEK	1	1.38514e-13	82.942	1	3.60515e-09	65.171	1	1.38514e-13
map01120 Microbial metabolism in diverse environments	3.40517e-09	1.86	KFZ67_13575	645	K	K01895	ACSS1_2, acs; acetyl-CoA synthetase [EC:6.2.1.1]	Acetyl-coenzyme A synthetase OS=Photobacterium damselae OX=38293 GN=acs PE=3 SV=1	acs	2	0.10552	3	LIAEK(1)QQLL	1	0.00442148	61.679	1	0.0138315	49.536	1	0.00442148
map01120 Microbial metabolism in diverse environments	3.40517e-09	1.86	KFZ67_13575	181	K	K01895	ACSS1_2, acs; acetyl-CoA synthetase [EC:6.2.1.1]	Acetyl-coenzyme A synthetase OS=Photobacterium damselae OX=38293 GN=acs PE=3 SV=1	acs	3	-0.031305	6	IIDSNAK(1)VVITADEGVR	1	1.38491e-08	85.421	1	1.38491e-08	85.421	1	7.93262e-08
map01120 Microbial metabolism in diverse environments	3.40517e-09	1.86	KFZ67_13575	585	K	K01895	ACSS1_2, acs; acetyl-CoA synthetase [EC:6.2.1.1]	Acetyl-coenzyme A synthetase OS=Photobacterium damselae OX=38293 GN=acs PE=3 SV=1	acs	3	-0.53717	2	K(1)EIGPIATPDFLHWTDALPK	1	8.15194e-07	64.843	1	8.15194e-07	64.843	1	8.46284e-07
map01120 Microbial metabolism in diverse environments	3.40517e-09	1.86	KFZ67_13575	617	K	K01895	ACSS1_2, acs; acetyl-CoA synthetase [EC:6.2.1.1]	Acetyl-coenzyme A synthetase OS=Photobacterium damselae OX=38293 GN=acs PE=3 SV=1	acs	3	2.0426	14	K(1)IATGDTSNLGDTSTLADPSVVEK	1	1.44189e-32	113.65	1	8.84848e-24	103.92	1	1.44189e-32
map01120 Microbial metabolism in diverse environments	3.40517e-09	1.86	KFZ67_13575	348	K	K01895	ACSS1_2, acs; acetyl-CoA synthetase [EC:6.2.1.1]	Acetyl-coenzyme A synthetase OS=Photobacterium damselae OX=38293 GN=acs PE=3 SV=1	acs	3	1.4901	3	MSQVVDK(1)HQVNILYTAPTAIR	1	2.27558e-10	74.364	1	8.5193e-08	72.167	1	2.27558e-10
map01120 Microbial metabolism in diverse environments	3.40517e-09	1.86	KFZ67_15635	179	K	K01679	E4.2.1.2B, fumC, FH; fumarate hydratase, class II [EC:4.2.1.2]	Fumarate hydratase class II OS=Photobacterium damselae OX=38293 GN=aspA PE=3 SV=1	aspA	3	-0.39316	2	AIGHIVK(1)TGR	1	0.00190143	60.167	1	0.00345384	55.806	1	0.00190143
map01120 Microbial metabolism in diverse environments	3.40517e-09	1.86	KFZ67_17960	243	K	K00615	E2.2.1.1, tktA, tktB; transketolase [EC:2.2.1.1]	Transketolase OS=Photobacterium damselae OX=38293 GN=tkt PE=3 SV=1	tkt	3	-0.54468	4	ADTTRPTLICCK(1)TIIGFGSPNK	1	1.47338e-10	67.895	1	1.47338e-10	65.833	1	4.51088e-07
map01120 Microbial metabolism in diverse environments	3.40517e-09	1.86	KFZ67_17965	315	K	K00616	E2.2.1.2, talA, talB; transaldolase [EC:2.2.1.2]	Transaldolase OS=Photobacterium damselae OX=38293 GN=tal PE=3 SV=1	tal	2	-0.22748	2	LETMIAEK(1)L	1	0.0237298	44.349	1	0.0237298	44.349	1	0.0309347
map01120 Microbial metabolism in diverse environments	3.40517e-09	1.86	KFZ67_17965	269	K	K00616	E2.2.1.2, talA, talB; transaldolase [EC:2.2.1.2]	Transaldolase OS=Photobacterium damselae OX=38293 GN=tal PE=3 SV=1	tal	2	-0.17267	3	LLPATEVK(1)AR	1	1.09638e-08	121.73	1	4.03992e-05	98.048	1	1.09638e-08
map01120 Microbial metabolism in diverse environments	3.40517e-09	1.86	KFZ67_17965	4	K	K00616	E2.2.1.2, talA, talB; transaldolase [EC:2.2.1.2]	Transaldolase OS=Photobacterium damselae OX=38293 GN=tal PE=3 SV=1	tal	2	-1.0554	3	STK(1)LEQLR	1	0.000936256	89.698	1	0.00610738	72.23	1	0.000936256
map01130 Biosynthesis of antibiotics	3.64488e-06	1.67	KFZ67_00790	85	K	K15633	gpmI; 2,3-bisphosphoglycerate-independent phosphoglycerate mutase [EC:5.4.2.12]	2,3-bisphosphoglycerate-independent phosphoglycerate mutase OS=Photobacterium damselae OX=38293 GN=gpmI PE=3 SV=1	gpmI	3	1.0038	4	ITK(1)AISDGEFFENDVLVAAMDAAIK	1	1.0874e-07	69.284	1	1.0874e-07	69.284	1	3.09664e-05
map01130 Biosynthesis of antibiotics	3.64488e-06	1.67	KFZ67_00790	5	K	K15633	gpmI; 2,3-bisphosphoglycerate-independent phosphoglycerate mutase [EC:5.4.2.12]	2,3-bisphosphoglycerate-independent phosphoglycerate mutase OS=Photobacterium damselae OX=38293 GN=gpmI PE=3 SV=1	gpmI	3	0.59951	3	K(1)PLALVILDGWGYR	1	7.4024e-10	98.337	1	7.4024e-10	98.337	1	4.98505e-05
map01130 Biosynthesis of antibiotics	3.64488e-06	1.67	KFZ67_00790	480	K	K15633	gpmI; 2,3-bisphosphoglycerate-independent phosphoglycerate mutase [EC:5.4.2.12]	2,3-bisphosphoglycerate-independent phosphoglycerate mutase OS=Photobacterium damselae OX=38293 GN=gpmI PE=3 SV=1	gpmI	2	1.5935	4	SLTLK(1)DNGK	1	4.4525e-24	148.52	1	4.99976e-24	147.2	1	4.4525e-24
map01130 Biosynthesis of antibiotics	3.64488e-06	1.67	KFZ67_00835	215	K	K00850	pfkA, PFK; 6-phosphofructokinase 1 [EC:2.7.1.11]	ATP-dependent 6-phosphofructokinase OS=Photobacterium damselae OX=38293 GN=pfkA PE=3 SV=1	pfkA	3	1.7226	3	K(1)HAIIAITELMTDVNELAK	1	2.59634e-12	94.281	1	8.68522e-12	85.937	1	2.59634e-12
map01130 Biosynthesis of antibiotics	3.64488e-06	1.67	KFZ67_00840	11	K	K01803	TPI, tpiA; triosephosphate isomerase (TIM) [EC:5.3.1.1]	Triosephosphate isomerase OS=Photobacterium damselae OX=38293 GN=tpiA PE=3 SV=1	tpiA	2	1.236	7	HPVVMGNWK(1)LNGSK	1	4.98702e-13	116.63	1	8.79917e-05	73.415	1	4.98702e-13
map01130 Biosynthesis of antibiotics	3.64488e-06	1.67	KFZ67_01065	311	K	K00821	argD; acetylornithine/N-succinyldiaminopimelate aminotransferase [EC:2.6.1.11 2.6.1.17]	Acetylornithine aminotransferase OS=Photobacterium damselae subsp. damselae OX=85581 GN=argD PE=3 SV=1	argD	3	0.26568	4	AAISEIIKPELLAGVK(1)ER	1	1.06545e-15	105.06	0.999999	1.67532e-11	87.24	1	1.06545e-15
map01130 Biosynthesis of antibiotics	3.64488e-06	1.67	KFZ67_01975	466	K	K00163	aceE; pyruvate dehydrogenase E1 component [EC:1.2.4.1]	Pyruvate dehydrogenase E1 component OS=Photobacterium damselae subsp. damselae OX=85581 GN=aceE PE=4 SV=1	aceE	3	-0.23359	3	DALHGYTPK(1)R	1	9.94784e-05	93.096	1	0.00140899	64.82	1	9.94784e-05
map01130 Biosynthesis of antibiotics	3.64488e-06	1.67	KFZ67_01975	360	K	K00163	aceE; pyruvate dehydrogenase E1 component [EC:1.2.4.1]	Pyruvate dehydrogenase E1 component OS=Photobacterium damselae subsp. damselae OX=85581 GN=aceE PE=4 SV=1	aceE	3	-1.3058	4	YPETAALVADMTDDEIFALK(1)R	1	3.65445e-07	68.952	1	9.00136e-07	62.648	1	3.65445e-07
map01130 Biosynthesis of antibiotics	3.64488e-06	1.67	KFZ67_01975	389	K	K00163	aceE; pyruvate dehydrogenase E1 component [EC:1.2.4.1]	Pyruvate dehydrogenase E1 component OS=Photobacterium damselae subsp. damselae OX=85581 GN=aceE PE=4 SV=1	aceE	2	0.039841	4	ETQGKPTVILAK(1)TIK	0.999998	0.000260164	65.231	0.999975	0.00226635	54.764	0.999998	0.000260164
map01130 Biosynthesis of antibiotics	3.64488e-06	1.67	KFZ67_01975	392	K	K00163	aceE; pyruvate dehydrogenase E1 component [EC:1.2.4.1]	Pyruvate dehydrogenase E1 component OS=Photobacterium damselae subsp. damselae OX=85581 GN=aceE PE=4 SV=1	aceE	2	0.54867	9	TIK(1)GYGMGDAAEGK	1	1.16173e-06	87.519	1	5.03359e-05	78.69	1	1.16173e-06
map01130 Biosynthesis of antibiotics	3.64488e-06	1.67	KFZ67_01975	509	K	K00163	aceE; pyruvate dehydrogenase E1 component [EC:1.2.4.1]	Pyruvate dehydrogenase E1 component OS=Photobacterium damselae subsp. damselae OX=85581 GN=aceE PE=4 SV=1	aceE	2	0.1758	4	ILNILLK(1)DK	1	0.000680928	85.355	1	0.00194444	74.841	1	0.000680928
map01130 Biosynthesis of antibiotics	3.64488e-06	1.67	KFZ67_01975	411	K	K00163	aceE; pyruvate dehydrogenase E1 component [EC:1.2.4.1]	Pyruvate dehydrogenase E1 component OS=Photobacterium damselae subsp. damselae OX=85581 GN=aceE PE=4 SV=1	aceE	4	-2.3066	7	K(1)MDMTHVQHLR	1	4.7509e-06	108.7	1	0.00011672	79.659	1	4.7509e-06
map01130 Biosynthesis of antibiotics	3.64488e-06	1.67	KFZ67_01975	377	K	K00163	aceE; pyruvate dehydrogenase E1 component [EC:1.2.4.1]	Pyruvate dehydrogenase E1 component OS=Photobacterium damselae subsp. damselae OX=85581 GN=aceE PE=4 SV=1	aceE	2	-4.3321	3	LFAAFNNAK(1)ETQGK	1	6.94686e-05	81.904	1	6.94686e-05	76.01	1	7.7979e-05
map01130 Biosynthesis of antibiotics	3.64488e-06	1.67	KFZ67_01975	872	K	K00163	aceE; pyruvate dehydrogenase E1 component [EC:1.2.4.1]	Pyruvate dehydrogenase E1 component OS=Photobacterium damselae subsp. damselae OX=85581 GN=aceE PE=4 SV=1	aceE	2	1.5299	6	SVVADAIK(1)K	1	0.00364803	63.397	1	0.00393358	61.78	1	0.00364803
map01130 Biosynthesis of antibiotics	3.64488e-06	1.67	KFZ67_01980	339	K	K00627	DLAT, aceF, pdhC; pyruvate dehydrogenase E2 component (dihydrolipoamide acetyltransferase) [EC:2.3.1.12]	Acetyltransferase component of pyruvate dehydrogenase complex OS=Photobacterium damselae subsp. damselae OX=85581 GN=aceF PE=3 SV=1	aceF	2	1.0038	3	EFGVNLAK(1)VK	1	0.000550774	79.148	1	0.000550774	79.148	1	0.00134743
map01130 Biosynthesis of antibiotics	3.64488e-06	1.67	KFZ67_01980	351	K	K00627	DLAT, aceF, pdhC; pyruvate dehydrogenase E2 component (dihydrolipoamide acetyltransferase) [EC:2.3.1.12]	Acetyltransferase component of pyruvate dehydrogenase complex OS=Photobacterium damselae subsp. damselae OX=85581 GN=aceF PE=3 SV=1	aceF	2	0.33202	3	ILK(1)EDVQNFVK	1	2.46783e-09	116.55	1	2.46783e-09	116.55	1	2.87648e-09
map01130 Biosynthesis of antibiotics	3.64488e-06	1.67	KFZ67_01985	256	K	K00382	DLD, lpd, pdhD; dihydrolipoamide dehydrogenase [EC:1.8.1.4]	Dihydrolipoyl dehydrogenase OS=Photobacterium damselae OX=38293 GN=lpdA PE=3 SV=1	lpdA	2	0.49886	3	EDGIYVSMEGK(1)K	1	0.000201095	75.739	1	0.000201095	75.739	1	0.00026044
map01130 Biosynthesis of antibiotics	3.64488e-06	1.67	KFZ67_01985	300	K	K00382	DLD, lpd, pdhD; dihydrolipoamide dehydrogenase [EC:1.8.1.4]	Dihydrolipoyl dehydrogenase OS=Photobacterium damselae OX=38293 GN=lpdA PE=3 SV=1	lpdA	2	-0.61459	7	GFIHVDK(1)QMR	1	1.1894e-07	114.97	1	0.000187872	89.679	1	1.1894e-07
map01130 Biosynthesis of antibiotics	3.64488e-06	1.67	KFZ67_01985	285	K	K00382	DLD, lpd, pdhD; dihydrolipoamide dehydrogenase [EC:1.8.1.4]	Dihydrolipoyl dehydrogenase OS=Photobacterium damselae OX=38293 GN=lpdA PE=3 SV=1	lpdA	2	0.00077076	3	LLDAEK(1)AGIEVDER	1	1.16173e-06	87.519	1	1.16173e-06	87.519	1	1.50465e-05
map01130 Biosynthesis of antibiotics	3.64488e-06	1.67	KFZ67_01985	152	K	K00382	DLD, lpd, pdhD; dihydrolipoamide dehydrogenase [EC:1.8.1.4]	Dihydrolipoyl dehydrogenase OS=Photobacterium damselae OX=38293 GN=lpdA PE=3 SV=1	lpdA	3	-0.61856	2	PIK(1)LPFIPHEDPR	1	0.000130685	73.927	1	0.000391848	65.043	1	0.000130685
map01130 Biosynthesis of antibiotics	3.64488e-06	1.67	KFZ67_01985	279	K	K00382	DLD, lpd, pdhD; dihydrolipoamide dehydrogenase [EC:1.8.1.4]	Dihydrolipoyl dehydrogenase OS=Photobacterium damselae OX=38293 GN=lpdA PE=3 SV=1	lpdA	2	-0.014866	6	VPNGK(1)LLDAEK	1	7.26591e-06	94.402	1	7.26591e-06	94.402	1	6.00796e-05
map01130 Biosynthesis of antibiotics	3.64488e-06	1.67	KFZ67_02005	387	K	K01682	acnB; aconitate hydratase 2 / 2-methylisocitrate dehydratase [EC:4.2.1.3 4.2.1.99]	Aconitate hydratase B OS=Photobacterium damselae subsp. damselae OX=85581 GN=acnB PE=3 SV=1	acnB	2	2.1684	6	GYTLAQK(1)MVGK	1	0.000309863	72.2	1	0.000309863	72.2	1	0.000468429
map01130 Biosynthesis of antibiotics	3.64488e-06	1.67	KFZ67_02330	27	K	K00927	PGK, pgk; phosphoglycerate kinase [EC:2.7.2.3]	Phosphoglycerate kinase OS=Photobacterium damsela subsp. piscicida OX=38294 GN=pgk PE=3 SV=1	pgk	2	-0.89737	7	ADLNVPVK(1)DGK	1	0.000824172	68.676	1	0.00127952	64.121	1	0.000824172
map01130 Biosynthesis of antibiotics	3.64488e-06	1.67	KFZ67_02330	53	K	K00927	PGK, pgk; phosphoglycerate kinase [EC:2.7.2.3]	Phosphoglycerate kinase OS=Photobacterium damsela subsp. piscicida OX=38294 GN=pgk PE=3 SV=1	pgk	3	-0.76268	3	HCLEAGAK(1)VMVTSHLGR	1	8.61424e-13	103.13	1	3.76371e-06	65.105	1	8.61424e-13
map01130 Biosynthesis of antibiotics	3.64488e-06	1.67	KFZ67_02330	374	K	K00927	PGK, pgk; phosphoglycerate kinase [EC:2.7.2.3]	Phosphoglycerate kinase OS=Photobacterium damsela subsp. piscicida OX=38294 GN=pgk PE=3 SV=1	pgk	2	-0.1494	6	K(1)LPAVEMLETR	1	9.57148e-06	92.247	1	9.57148e-06	92.247	1	1.83278e-05
map01130 Biosynthesis of antibiotics	3.64488e-06	1.67	KFZ67_02330	14	K	K00927	PGK, pgk; phosphoglycerate kinase [EC:2.7.2.3]	Phosphoglycerate kinase OS=Photobacterium damsela subsp. piscicida OX=38294 GN=pgk PE=3 SV=1	pgk	2	0.018359	19	MTDLDLAGK(1)R	1	2.85585e-45	179.1	1	2.85585e-45	179.1	1	1.47692e-24
map01130 Biosynthesis of antibiotics	3.64488e-06	1.67	KFZ67_02330	193	K	K00927	PGK, pgk; phosphoglycerate kinase [EC:2.7.2.3]	Phosphoglycerate kinase OS=Photobacterium damsela subsp. piscicida OX=38294 GN=pgk PE=3 SV=1	pgk	2	4.0599	5	PMVAIVGGSK(1)VSTK	1	2.20557e-05	82.651	1	2.20557e-05	82.651	1	8.49995e-05
map01130 Biosynthesis of antibiotics	3.64488e-06	1.67	KFZ67_02330	197	K	K00927	PGK, pgk; phosphoglycerate kinase [EC:2.7.2.3]	Phosphoglycerate kinase OS=Photobacterium damsela subsp. piscicida OX=38294 GN=pgk PE=3 SV=1	pgk	2	-1.0685	3	VSTK(1)LTVLESLSK	1	0.000130554	77.204	1	0.0004135	68.044	1	0.000130554
map01130 Biosynthesis of antibiotics	3.64488e-06	1.67	KFZ67_02330	5	K	K00927	PGK, pgk; phosphoglycerate kinase [EC:2.7.2.3]	Phosphoglycerate kinase OS=Photobacterium damsela subsp. piscicida OX=38294 GN=pgk PE=3 SV=1	pgk	2	1.8353	13	SVIK(1)MTDLDLAGK	1	0.000249755	71.879	1	0.000249755	71.879	1	0.000265057
map01130 Biosynthesis of antibiotics	3.64488e-06	1.67	KFZ67_02335	72	K	K01624	FBA, fbaA; fructose-bisphosphate aldolase, class II [EC:4.1.2.13]	Fructose-bisphosphate aldolase OS=Photobacterium damselae OX=38293 GN=fbaA PE=3 SV=1	fbaA	3	2.129	2	APVIVQFSNGGAAFFAGK(1)GLK	1	9.91832e-36	133.94	1	3.94466e-35	131.67	1	9.91832e-36
map01130 Biosynthesis of antibiotics	3.64488e-06	1.67	KFZ67_02335	75	K	K01624	FBA, fbaA; fructose-bisphosphate aldolase, class II [EC:4.1.2.13]	Fructose-bisphosphate aldolase OS=Photobacterium damselae OX=38293 GN=fbaA PE=3 SV=1	fbaA	2	1.6554	6	GLK(1)LEGQEAQIK	1	8.87281e-06	87.719	1	0.00424577	63.091	1	8.87281e-06
map01130 Biosynthesis of antibiotics	3.64488e-06	1.67	KFZ67_02335	29	K	K01624	FBA, fbaA; fructose-bisphosphate aldolase, class II [EC:4.1.2.13]	Fructose-bisphosphate aldolase OS=Photobacterium damselae OX=38293 GN=fbaA PE=3 SV=1	fbaA	3	-1.3666	2	ENK(1)FALPAVNVVNTDTINGVLEAAAK	1	1.71893e-11	80.02	1	1.71893e-11	80.02	1	1.01532e-07
map01130 Biosynthesis of antibiotics	3.64488e-06	1.67	KFZ67_02335	325	K	K01624	FBA, fbaA; fructose-bisphosphate aldolase, class II [EC:4.1.2.13]	Fructose-bisphosphate aldolase OS=Photobacterium damselae OX=38293 GN=fbaA PE=3 SV=1	fbaA	3	-0.39934	10	KFEAENHDYLQGQIGNPTGPDAPNK(1)K	1	1.11269e-42	130.98	1	9.16463e-33	114.75	1	1.11269e-42
map01130 Biosynthesis of antibiotics	3.64488e-06	1.67	KFZ67_02335	84	K	K01624	FBA, fbaA; fructose-bisphosphate aldolase, class II [EC:4.1.2.13]	Fructose-bisphosphate aldolase OS=Photobacterium damselae OX=38293 GN=fbaA PE=3 SV=1	fbaA	2	0.40311	5	LEGQEAQIK(1)GAVAGAK	1	9.57618e-09	94.487	1	9.57618e-09	94.487	1	2.26457e-08
map01130 Biosynthesis of antibiotics	3.64488e-06	1.67	KFZ67_02335	20	K	K01624	FBA, fbaA; fructose-bisphosphate aldolase, class II [EC:4.1.2.13]	Fructose-bisphosphate aldolase OS=Photobacterium damselae OX=38293 GN=fbaA PE=3 SV=1	fbaA	3	0.52701	5	IFDFVKPGVISGDDVQK(1)VFEVAK	1	4.81435e-22	107.21	0.999677	5.6263e-07	64.749	1	4.81435e-22
map01130 Biosynthesis of antibiotics	3.64488e-06	1.67	KFZ67_02335	26	K	K01624	FBA, fbaA; fructose-bisphosphate aldolase, class II [EC:4.1.2.13]	Fructose-bisphosphate aldolase OS=Photobacterium damselae OX=38293 GN=fbaA PE=3 SV=1	fbaA	2	1.0733	6	VFEVAK(1)ENK	1	1.00106e-07	119.75	1	1.00106e-07	119.75	1	3.84516e-05
map01130 Biosynthesis of antibiotics	3.64488e-06	1.67	KFZ67_02335	301	K	K01624	FBA, fbaA; fructose-bisphosphate aldolase, class II [EC:4.1.2.13]	Fructose-bisphosphate aldolase OS=Photobacterium damselae OX=38293 GN=fbaA PE=3 SV=1	fbaA	3	0.21001	8	K(1)FEAENHDYLQGQIGNPTGPDAPNK	1	2.10236e-16	86.18	1	1.18301e-07	69.284	1	2.10236e-16
map01130 Biosynthesis of antibiotics	3.64488e-06	1.67	KFZ67_02335	113	K	K01624	FBA, fbaA; fructose-bisphosphate aldolase, class II [EC:4.1.2.13]	Fructose-bisphosphate aldolase OS=Photobacterium damselae OX=38293 GN=fbaA PE=3 SV=1	fbaA	5	-0.76607	13	YVHAIAETYGVPVILHTDHAAK(1)K	1	1.63571e-44	136.49	1	3.60001e-35	122.94	1	1.63571e-44
map01130 Biosynthesis of antibiotics	3.64488e-06	1.67	KFZ67_02360	8	K	K01807	rpiA; ribose 5-phosphate isomerase A [EC:5.3.1.6]	Ribose-5-phosphate isomerase A OS=Photobacterium damselae OX=38293 GN=rpiA PE=3 SV=1	rpiA	2	0.91171	3	K(1)AAGWAALEYVK	1	0.00172073	56.569	1	0.00289524	49.269	1	0.00172073
map01130 Biosynthesis of antibiotics	3.64488e-06	1.67	KFZ67_02395	9	K	K02437	gcvH, GCSH; glycine cleavage system H protein	Glycine cleavage system H protein OS=Photobacterium damselae OX=38293 GN=gcvH PE=3 SV=1	gcvH	4	-0.53551	3	SYVPSDLK(1)FTHSHEWVR	1	1.30603e-12	99.747	1	1.30603e-12	99.747	1	3.53027e-10
map01130 Biosynthesis of antibiotics	3.64488e-06	1.67	KFZ67_02535	427	K	K01689	ENO, eno; enolase [EC:4.2.1.11]	Enolase OS=Photobacterium damselae OX=38293 GN=eno PE=3 SV=1	eno	2	-0.59808	8	APFNGLK(1)EVK	1	0.000183885	89.9	1	0.00111448	70.675	1	0.000183885
map01130 Biosynthesis of antibiotics	3.64488e-06	1.67	KFZ67_02535	85	K	K01689	ENO, eno; enolase [EC:4.2.1.11]	Enolase OS=Photobacterium damselae OX=38293 GN=eno PE=3 SV=1	eno	3	-1.2424	15	DAK(1)DQAAIDQIMIDLDGTENK	1	7.41891e-64	162.73	1	7.41891e-64	162.73	1	2.42034e-53
map01130 Biosynthesis of antibiotics	3.64488e-06	1.67	KFZ67_02535	255	K	K01689	ENO, eno; enolase [EC:4.2.1.11]	Enolase OS=Photobacterium damselae OX=38293 GN=eno PE=3 SV=1	eno	3	4.3109	11	DVTLAMDCAASEFYNK(1)EEGIYDLK	1	1.54896e-23	98.3	1	6.03072e-08	71.651	1	1.54896e-23
map01130 Biosynthesis of antibiotics	3.64488e-06	1.67	KFZ67_02535	263	K	K01689	ENO, eno; enolase [EC:4.2.1.11]	Enolase OS=Photobacterium damselae OX=38293 GN=eno PE=3 SV=1	eno	2	-1.1276	10	EEGIYDLK(1)GEGK	1	5.62616e-07	100.38	1	1.52967e-06	96.82	1	5.62616e-07
map01130 Biosynthesis of antibiotics	3.64488e-06	1.67	KFZ67_02535	62	K	K01689	ENO, eno; enolase [EC:4.2.1.11]	Enolase OS=Photobacterium damselae OX=38293 GN=eno PE=3 SV=1	eno	2	-0.40512	5	FLGK(1)GVLK	1	0.00689487	70.552	1	0.0283621	49.097	1	0.00689487
map01130 Biosynthesis of antibiotics	3.64488e-06	1.67	KFZ67_02535	66	K	K01689	ENO, eno; enolase [EC:4.2.1.11]	Enolase OS=Photobacterium damselae OX=38293 GN=eno PE=3 SV=1	eno	3	0.30804	6	GVLK(1)AVTAVNGPIAEALLGK	1	1.65234e-12	88.176	1	6.02277e-10	74.029	1	1.65234e-12
map01130 Biosynthesis of antibiotics	3.64488e-06	1.67	KFZ67_02535	358	K	K01689	ENO, eno; enolase [EC:4.2.1.11]	Enolase OS=Photobacterium damselae OX=38293 GN=eno PE=3 SV=1	eno	3	0.29186	3	FNQIGSLTETLAAIK(1)MAK	1	5.20181e-12	93.495	1	5.20181e-12	93.495	1	1.24077e-09
map01130 Biosynthesis of antibiotics	3.64488e-06	1.67	KFZ67_02535	361	K	K01689	ENO, eno; enolase [EC:4.2.1.11]	Enolase OS=Photobacterium damselae OX=38293 GN=eno PE=3 SV=1	eno	3	-0.37269	7	MAK(1)DAGYTAVISHR	1	2.26609e-32	157.86	1	2.95933e-18	133.48	1	2.26609e-32
map01130 Biosynthesis of antibiotics	3.64488e-06	1.67	KFZ67_02535	326	K	K01689	ENO, eno; enolase [EC:4.2.1.11]	Enolase OS=Photobacterium damselae OX=38293 GN=eno PE=3 SV=1	eno	3	-0.44436	3	IQLVGDDLFVTNTK(1)ILAEGIEK	1	3.12209e-35	130.89	1	3.12209e-35	130.89	1	2.17598e-21
map01130 Biosynthesis of antibiotics	3.64488e-06	1.67	KFZ67_02535	312	K	K01689	ENO, eno; enolase [EC:4.2.1.11]	Enolase OS=Photobacterium damselae OX=38293 GN=eno PE=3 SV=1	eno	3	1.3262	5	LLGDK(1)IQLVGDDLFVTNTK	1	2.90195e-22	121.01	1	2.23582e-21	111.6	1	2.90195e-22
map01130 Biosynthesis of antibiotics	3.64488e-06	1.67	KFZ67_02535	120	K	K01689	ENO, eno; enolase [EC:4.2.1.11]	Enolase OS=Photobacterium damselae OX=38293 GN=eno PE=3 SV=1	eno	3	-0.13408	4	SNFGANAILAVSLANAK(1)AAAAAK	1	1.97278e-35	129.2	1	1.97278e-35	129.2	1	1.65142e-27
map01130 Biosynthesis of antibiotics	3.64488e-06	1.67	KFZ67_02535	406	K	K01689	ENO, eno; enolase [EC:4.2.1.11]	Enolase OS=Photobacterium damselae OX=38293 GN=eno PE=3 SV=1	eno	2	-0.2721	5	VAK(1)YNQLIR	1	6.97595e-17	138.54	1	8.41821e-17	136.8	1	6.97595e-17
map01130 Biosynthesis of antibiotics	3.64488e-06	1.67	KFZ67_03145	136	K	K01962	accA; acetyl-CoA carboxylase carboxyl transferase subunit alpha [EC:6.4.1.2 2.1.3.15]	Acetyl-coenzyme A carboxylase carboxyl transferase subunit alpha OS=Photobacterium damselae subsp. damselae OX=85581 GN=accA PE=3 SV=1	accA	2	-0.23154	2	NFGMPK(1)PEGYR	1	0.000148501	81.017	1	0.000148501	81.017	1	0.000991815
map01130 Biosynthesis of antibiotics	3.64488e-06	1.67	KFZ67_03440	153	K	K01714	dapA; 4-hydroxy-tetrahydrodipicolinate synthase [EC:4.3.3.7]	4-hydroxy-tetrahydrodipicolinate synthase OS=Photobacterium damselae OX=38293 GN=dapA PE=3 SV=1	dapA	2	-1.0287	3	LAK(1)LDNIIGIK	1	0.000328187	74.611	1	0.00475922	50.484	1	0.000328187
map01130 Biosynthesis of antibiotics	3.64488e-06	1.67	KFZ67_03710	111	K	K00948	PRPS, prsA; ribose-phosphate pyrophosphokinase [EC:2.7.6.1]	Ribose-phosphate pyrophosphokinase OS=Photobacterium damselae OX=38293 GN=prs PE=3 SV=1	prs	3	-1.0229	4	VPITAK(1)VVADFLSNVGVDR	1	5.99068e-16	103.41	1	5.99068e-16	103.41	1	6.72431e-16
map01130 Biosynthesis of antibiotics	3.64488e-06	1.67	KFZ67_04075	114	K	K01736	aroC; chorismate synthase [EC:4.2.3.5]	Chorismate synthase OS=Photobacterium damselae OX=38293 GN=aroC PE=3 SV=1	aroC	4	-0.50724	2	PGHADYTYHQK(1)YGIR	1	3.24101e-12	106.11	1	9.08232e-06	70.829	1	3.24101e-12
map01130 Biosynthesis of antibiotics	3.64488e-06	1.67	KFZ67_04260	166	K	K00133	asd; aspartate-semialdehyde dehydrogenase [EC:1.2.1.11]	Aspartate-semialdehyde dehydrogenase OS=Photobacterium damsela subsp. piscicida OX=38294 GN=asd PE=3 SV=1	asd	2	-0.3557	3	INVATYQSVSGSGK(1)K	1	5.27389e-09	96.673	1	5.12514e-08	86.497	1	5.27389e-09
map01130 Biosynthesis of antibiotics	3.64488e-06	1.67	KFZ67_04275	10	K	K01963	accD; acetyl-CoA carboxylase carboxyl transferase subunit beta [EC:6.4.1.2 2.1.3.15]	Acetyl-coenzyme A carboxylase carboxyl transferase subunit beta OS=Photobacterium damselae subsp. damselae OX=85581 GN=accD PE=3 SV=1	accD	2	0.1021	3	ILTK(1)SNIVTSR	1	1.12446e-09	119.74	1	9.70305e-07	103.43	1	1.12446e-09
map01130 Biosynthesis of antibiotics	3.64488e-06	1.67	KFZ67_04335	7	K	K00963	UGP2, galU, galF; UTP--glucose-1-phosphate uridylyltransferase [EC:2.7.7.9]	UTP--glucose-1-phosphate uridylyltransferase OS=Photobacterium damselae OX=38293 GN=galU PE=3 SV=1	galU	2	0.44021	3	K(1)AVIPVAGLGTR	1	2.87812e-07	97.463	1	0.00135418	70.089	1	2.87812e-07
map01130 Biosynthesis of antibiotics	3.64488e-06	1.67	KFZ67_04535	261	K	K00134	GAPDH, gapA; glyceraldehyde 3-phosphate dehydrogenase [EC:1.2.1.12]	Glyceraldehyde-3-phosphate dehydrogenase OS=Photobacterium damselae OX=38293 GN=BST98_04565 PE=3 SV=1	BST98_04565	2	0.63932	5	AMK(1)DASEGSLK	1	8.3041e-07	101.39	1	8.3041e-07	101.39	1	1.17696e-06
map01130 Biosynthesis of antibiotics	3.64488e-06	1.67	KFZ67_04535	269	K	K00134	GAPDH, gapA; glyceraldehyde 3-phosphate dehydrogenase [EC:1.2.1.12]	Glyceraldehyde-3-phosphate dehydrogenase OS=Photobacterium damselae OX=38293 GN=BST98_04565 PE=3 SV=1	BST98_04565	3	-1.3297	6	DASEGSLK(1)GILGYTEDAVVSTDFNGDTR	1	3.40921e-46	123.19	1	3.40921e-46	123.19	1	1.64781e-19
map01130 Biosynthesis of antibiotics	3.64488e-06	1.67	KFZ67_04535	225	K	K00134	GAPDH, gapA; glyceraldehyde 3-phosphate dehydrogenase [EC:1.2.1.12]	Glyceraldehyde-3-phosphate dehydrogenase OS=Photobacterium damselae OX=38293 GN=BST98_04565 PE=3 SV=1	BST98_04565	3	-1.2794	3	AVGVVLPEVNGK(1)LTGMAFR	1	4.58562e-52	144.15	1	1.80574e-36	144.15	1	4.58562e-52
map01130 Biosynthesis of antibiotics	3.64488e-06	1.67	KFZ67_04535	70	K	K00134	GAPDH, gapA; glyceraldehyde 3-phosphate dehydrogenase [EC:1.2.1.12]	Glyceraldehyde-3-phosphate dehydrogenase OS=Photobacterium damselae OX=38293 GN=BST98_04565 PE=3 SV=1	BST98_04565	3	1.451	5	FNGTVEVEGGNLIVNGK(1)TVR	1	6.36502e-22	110.33	1	6.36502e-22	110.33	1	1.6887e-12
map01130 Biosynthesis of antibiotics	3.64488e-06	1.67	KFZ67_04535	258	K	K00134	GAPDH, gapA; glyceraldehyde 3-phosphate dehydrogenase [EC:1.2.1.12]	Glyceraldehyde-3-phosphate dehydrogenase OS=Photobacterium damselae OX=38293 GN=BST98_04565 PE=3 SV=1	BST98_04565	2	-0.93259	7	NGASYETICK(1)AMK	1	2.37952e-06	88.101	1	0.000101745	79.089	1	2.37952e-06
map01130 Biosynthesis of antibiotics	3.64488e-06	1.67	KFZ67_04535	4	K	K00134	GAPDH, gapA; glyceraldehyde 3-phosphate dehydrogenase [EC:1.2.1.12]	Glyceraldehyde-3-phosphate dehydrogenase OS=Photobacterium damselae OX=38293 GN=BST98_04565 PE=3 SV=1	BST98_04565	2	1.2903	3	TIK(1)VGINGFGR	1	2.28342e-05	97.472	1	9.04359e-05	93.096	1	2.28342e-05
map01130 Biosynthesis of antibiotics	3.64488e-06	1.67	KFZ67_04535	192	K	K00134	GAPDH, gapA; glyceraldehyde 3-phosphate dehydrogenase [EC:1.2.1.12]	Glyceraldehyde-3-phosphate dehydrogenase OS=Photobacterium damselae OX=38293 GN=BST98_04565 PE=3 SV=1	BST98_04565	2	-0.48363	5	TVDGPSAK(1)DWR	1	1.02847e-60	189.58	1	1.02847e-60	189.58	1	6.9966e-48
map01130 Biosynthesis of antibiotics	3.64488e-06	1.67	KFZ67_04535	184	K	K00134	GAPDH, gapA; glyceraldehyde 3-phosphate dehydrogenase [EC:1.2.1.12]	Glyceraldehyde-3-phosphate dehydrogenase OS=Photobacterium damselae OX=38293 GN=BST98_04565 PE=3 SV=1	BST98_04565	3	-0.80049	11	VLNDNFGIESGLMTTVHATTATQK(1)TVDGPSAK	1	3.62959e-14	79.917	1	3.71691e-14	79.782	1	3.62959e-14
map01130 Biosynthesis of antibiotics	3.64488e-06	1.67	KFZ67_04945	236	K	K00031	IDH1, IDH2, icd; isocitrate dehydrogenase [EC:1.1.1.42]	Isocitrate dehydrogenase [NADP] OS=Photobacterium damselae OX=38293 GN=icd PE=4 SV=1	icd	2	-0.79941	7	GNIMK(1)FTEGAFK	1	7.7128e-05	82.505	1	0.000119746	80.555	1	7.7128e-05
map01130 Biosynthesis of antibiotics	3.64488e-06	1.67	KFZ67_04945	4	K	K00031	IDH1, IDH2, icd; isocitrate dehydrogenase [EC:1.1.1.42]	Isocitrate dehydrogenase [NADP] OS=Photobacterium damselae OX=38293 GN=icd PE=4 SV=1	icd	2	-1.5528	15	MDSK(1)VVVPVDGQK	1	5.06566e-07	94.688	1	2.3644e-06	88.163	1	5.06566e-07
map01130 Biosynthesis of antibiotics	3.64488e-06	1.67	KFZ67_04945	274	K	K00031	IDH1, IDH2, icd; isocitrate dehydrogenase [EC:1.1.1.42]	Isocitrate dehydrogenase [NADP] OS=Photobacterium damselae OX=38293 GN=icd PE=4 SV=1	icd	2	0.61097	3	NPNTGK(1)EIVVK	1	5.63111e-07	106.26	1	5.63111e-07	106.26	1	3.40291e-06
map01130 Biosynthesis of antibiotics	3.64488e-06	1.67	KFZ67_04945	56	K	K00031	IDH1, IDH2, icd; isocitrate dehydrogenase [EC:1.1.1.42]	Isocitrate dehydrogenase [NADP] OS=Photobacterium damselae OX=38293 GN=icd PE=4 SV=1	icd	2	0.5647	13	VVDAAVQK(1)AYGGDR	1	2.15272e-17	128.22	1	1.91715e-10	107.74	1	2.15272e-17
map01130 Biosynthesis of antibiotics	3.64488e-06	1.67	KFZ67_04945	351	K	K00031	IDH1, IDH2, icd; isocitrate dehydrogenase [EC:1.1.1.42]	Isocitrate dehydrogenase [NADP] OS=Photobacterium damselae OX=38293 GN=icd PE=4 SV=1	icd	3	0.2696	3	YAGQDK(1)VNPGSLILSAEMMLR	1	9.1815e-28	120.73	1	9.1815e-28	120.73	1	1.16609e-17
map01130 Biosynthesis of antibiotics	3.64488e-06	1.67	KFZ67_05140	286	K	K00645	fabD, MCAT, MCT1; [acyl-carrier-protein] S-malonyltransferase [EC:2.3.1.39]	Malonyl CoA-acyl carrier protein transacylase OS=Photobacterium damselae OX=38293 GN=BST98_05170 PE=3 SV=1	BST98_05170	2	0.57701	3	VLTGLTK(1)R	1	0.0295218	56.434	1	0.0338837	51.113	1	0.0295218
map01130 Biosynthesis of antibiotics	3.64488e-06	1.67	KFZ67_05150	10	K	K02078	acpP; acyl carrier protein	Acyl carrier protein OS=Photobacterium damsela subsp. piscicida OX=38294 GN=acpP PE=3 SV=1	acpP	3	1.0574	3	K(1)IIVEQLGVDESEVK	1	3.15493e-08	89.911	1	2.77047e-05	62.055	1	3.15493e-08
map01130 Biosynthesis of antibiotics	3.64488e-06	1.67	KFZ67_05990	219	K	K00873	PK, pyk; pyruvate kinase [EC:2.7.1.40]	Pyruvate kinase OS=Photobacterium damselae OX=38293 GN=BST98_06040 PE=3 SV=1	BST98_06040	2	0.4741	3	LAEEAGLQAK(1)LVAK	1	0.0002391	66.004	1	0.00111565	48.532	1	0.0002391
map01130 Biosynthesis of antibiotics	3.64488e-06	1.67	KFZ67_08760	59	K	K00832	tyrB; aromatic-amino-acid transaminase [EC:2.6.1.57]	Aminotransferase OS=Photobacterium damselae OX=38293 GN=BST98_08775 PE=3 SV=1	BST98_08775	2	1.2269	2	AEAILLDK(1)ETTK	1	0.000715088	66.989	1	0.00279747	51.726	1	0.000715088
map01130 Biosynthesis of antibiotics	3.64488e-06	1.67	KFZ67_08760	96	K	K00832	tyrB; aromatic-amino-acid transaminase [EC:2.6.1.57]	Aminotransferase OS=Photobacterium damselae OX=38293 GN=BST98_08775 PE=3 SV=1	BST98_08775	2	-1.2359	3	TK(1)TAQAPGGTGALR	1	2.19547e-17	128.09	1	2.20051e-13	119.87	1	2.19547e-17
map01130 Biosynthesis of antibiotics	3.64488e-06	1.67	KFZ67_08760	28	K	K00832	tyrB; aromatic-amino-acid transaminase [EC:2.6.1.57]	Aminotransferase OS=Photobacterium damselae OX=38293 GN=BST98_08775 PE=3 SV=1	BST98_08775	2	0.74073	3	VEK(1)INLGVGIYK	1	3.18593e-06	94.767	1	0.000249685	74.611	1	3.18593e-06
map01130 Biosynthesis of antibiotics	3.64488e-06	1.67	KFZ67_09505	28	K	K00626	E2.3.1.9, atoB; acetyl-CoA C-acetyltransferase [EC:2.3.1.9]	Acetyl-CoA C-acetyltransferase OS=Photobacterium damselae OX=38293 GN=CTM90_05090 PE=3 SV=1	CTM90_05090	2	-0.19634	3	DQAAGK(1)IAAEVIK	1	0.00072526	60.861	1	0.000903038	58.885	1	0.00072526
map01130 Biosynthesis of antibiotics	3.64488e-06	1.67	KFZ67_09505	345	K	K00626	E2.3.1.9, atoB; acetyl-CoA C-acetyltransferase [EC:2.3.1.9]	Acetyl-CoA C-acetyltransferase OS=Photobacterium damselae OX=38293 GN=CTM90_05090 PE=3 SV=1	CTM90_05090	4	1.9422	4	HQVEASDIIAK(1)ANLNGGAIALGHPLGASGNR	1	4.73063e-14	82.91	1	1.28533e-13	78.383	1	4.73063e-14
map01130 Biosynthesis of antibiotics	3.64488e-06	1.67	KFZ67_09505	10	K	K00626	E2.3.1.9, atoB; acetyl-CoA C-acetyltransferase [EC:2.3.1.9]	Acetyl-CoA C-acetyltransferase OS=Photobacterium damselae OX=38293 GN=CTM90_05090 PE=3 SV=1	CTM90_05090	2	0.69125	6	VFIVAAK(1)R	1	7.27634e-17	143	1	3.68027e-11	128.57	1	7.27634e-17
map01130 Biosynthesis of antibiotics	3.64488e-06	1.67	KFZ67_09945	262	K	K01902	sucD; succinyl-CoA synthetase alpha subunit [EC:6.2.1.5]	Succinate--CoA ligase [ADP-forming] subunit alpha OS=Photobacterium damselae subsp. damselae OX=85581 GN=sucD PE=3 SV=1	sucD	2	2.396	4	GTAEDK(1)FAALEAAGVR	1	7.66738e-06	70.451	1	1.19744e-05	67.646	1	7.66738e-06
map01130 Biosynthesis of antibiotics	3.64488e-06	1.67	KFZ67_09945	243	K	K01902	sucD; succinyl-CoA synthetase alpha subunit [EC:6.2.1.5]	Succinate--CoA ligase [ADP-forming] subunit alpha OS=Photobacterium damselae subsp. damselae OX=85581 GN=sucD PE=3 SV=1	sucD	3	0.028747	4	PVVSYIAGVTAPPGK(1)R	1	2.43283e-05	59.864	1	2.43283e-05	59.864	1	5.41189e-05
map01130 Biosynthesis of antibiotics	3.64488e-06	1.67	KFZ67_09945	228	K	K01902	sucD; succinyl-CoA synthetase alpha subunit [EC:6.2.1.5]	Succinate--CoA ligase [ADP-forming] subunit alpha OS=Photobacterium damselae subsp. damselae OX=85581 GN=sucD PE=3 SV=1	sucD	3	-0.51358	4	QHVTK(1)PVVSYIAGVTAPPGK	1	5.05431e-22	112.82	1	5.05431e-22	112.82	1	6.34281e-22
map01130 Biosynthesis of antibiotics	3.64488e-06	1.67	KFZ67_09945	7	K	K01902	sucD; succinyl-CoA synthetase alpha subunit [EC:6.2.1.5]	Succinate--CoA ligase [ADP-forming] subunit alpha OS=Photobacterium damselae subsp. damselae OX=85581 GN=sucD PE=3 SV=1	sucD	2	0.6527	3	SILINK(1)DTK	1	1.02589e-07	119.68	1	1.02589e-07	119.68	1	1.02589e-07
map01130 Biosynthesis of antibiotics	3.64488e-06	1.67	KFZ67_09950	380	K	K01903	sucC; succinyl-CoA synthetase beta subunit [EC:6.2.1.5]	Succinate--CoA ligase [ADP-forming] subunit beta OS=Photobacterium damselae OX=38293 GN=sucC PE=3 SV=1	sucC	3	-1.4071	3	LAESGLNIIAATSLTEAAEK(1)VVQAAEGK	1	3.00553e-35	111.4	1	3.00553e-35	111.4	1	2.43255e-26
map01130 Biosynthesis of antibiotics	3.64488e-06	1.67	KFZ67_09950	79	K	K01903	sucC; succinyl-CoA synthetase beta subunit [EC:6.2.1.5]	Succinate--CoA ligase [ADP-forming] subunit beta OS=Photobacterium damselae OX=38293 GN=sucC PE=3 SV=1	sucC	3	-0.12504	5	TFSQQWLGK(1)HLVTYQTDANGQPVSK	1	1.0675e-23	98.918	1	1.0675e-23	98.918	1	3.55625e-11
map01130 Biosynthesis of antibiotics	3.64488e-06	1.67	KFZ67_09955	287	K	K00658	DLST, sucB; 2-oxoglutarate dehydrogenase E2 component (dihydrolipoamide succinyltransferase) [EC:2.3.1.61]	Dihydrolipoyllysine-residue succinyltransferase component of 2-oxoglutarate dehydrogenase complex OS=Photobacterium damselae OX=38293 GN=BST98_09900 PE=3 SV=1	BST98_09900	2	-2.022	4	DCDK(1)LSLAEIEK	1	0.000551268	69.345	1	0.00118865	55.724	1	0.000551268
map01130 Biosynthesis of antibiotics	3.64488e-06	1.67	KFZ67_09955	77	K	K00658	DLST, sucB; 2-oxoglutarate dehydrogenase E2 component (dihydrolipoamide succinyltransferase) [EC:2.3.1.61]	Dihydrolipoyllysine-residue succinyltransferase component of 2-oxoglutarate dehydrogenase complex OS=Photobacterium damselae OX=38293 GN=BST98_09900 PE=3 SV=1	BST98_09900	3	-3.0246	2	LK(1)VNAVAGEPTVDVPAGAEASPNKR	1	5.87317e-17	95.153	1	5.87317e-17	95.153	0.999997	2.21644e-05
map01130 Biosynthesis of antibiotics	3.64488e-06	1.67	KFZ67_09955	99	K	K00658	DLST, sucB; 2-oxoglutarate dehydrogenase E2 component (dihydrolipoamide succinyltransferase) [EC:2.3.1.61]	Dihydrolipoyllysine-residue succinyltransferase component of 2-oxoglutarate dehydrogenase complex OS=Photobacterium damselae OX=38293 GN=BST98_09900 PE=3 SV=1	BST98_09900	3	-0.93464	4	VNAVAGEPTVDVPAGAEASPNK(1)R	1	4.15013e-11	81.977	1	1.31989e-10	74.192	1	4.15013e-11
map01130 Biosynthesis of antibiotics	3.64488e-06	1.67	KFZ67_09960	923	K	K00164	OGDH, sucA; 2-oxoglutarate dehydrogenase E1 component [EC:1.2.4.2]	2-oxoglutarate dehydrogenase E1 component OS=Photobacterium damselae OX=38293 GN=sucA PE=4 SV=1	sucA	3	-2.8372	3	PASASPAVGYMSVHLK(1)QQK	1	9.33891e-13	96.447	1	9.33891e-13	96.447	1	3.49173e-12
map01130 Biosynthesis of antibiotics	3.64488e-06	1.67	KFZ67_09970	267	K	K00239	sdhA, frdA; succinate dehydrogenase / fumarate reductase, flavoprotein subunit [EC:1.3.5.1 1.3.5.4]	Succinate dehydrogenase flavoprotein subunit OS=Photobacterium damselae OX=38293 GN=sdhA PE=3 SV=1	sdhA	2	-0.44072	3	GEGGYLLNK(1)DGER	1	0.00126184	54.898	1	0.00177311	49.216	1	0.00126184
map01130 Biosynthesis of antibiotics	3.64488e-06	1.67	KFZ67_09970	320	K	K00239	sdhA, frdA; succinate dehydrogenase / fumarate reductase, flavoprotein subunit [EC:1.3.5.1 1.3.5.4]	Succinate dehydrogenase flavoprotein subunit OS=Photobacterium damselae OX=38293 GN=sdhA PE=3 SV=1	sdhA	2	1.5562	3	LDHLGK(1)EVLESR	1	6.18548e-05	83.204	1	6.18548e-05	83.204	1	0.00015781
map01130 Biosynthesis of antibiotics	3.64488e-06	1.67	KFZ67_09970	124	K	K00239	sdhA, frdA; succinate dehydrogenase / fumarate reductase, flavoprotein subunit [EC:1.3.5.1 1.3.5.4]	Succinate dehydrogenase flavoprotein subunit OS=Photobacterium damselae OX=38293 GN=sdhA PE=3 SV=1	sdhA	2	0.056288	3	PFGGQSK(1)EFGGEQAAR	1	2.13975e-08	90.348	1	8.05754e-06	70.197	1	2.13975e-08
map01130 Biosynthesis of antibiotics	3.64488e-06	1.67	KFZ67_09970	281	K	K00239	sdhA, frdA; succinate dehydrogenase / fumarate reductase, flavoprotein subunit [EC:1.3.5.1 1.3.5.4]	Succinate dehydrogenase flavoprotein subunit OS=Photobacterium damselae OX=38293 GN=sdhA PE=3 SV=1	sdhA	2	-1.3261	3	YAPNAK(1)DLAGR	1	0.00210855	59.265	1	0.00210855	59.265	1	0.00361625
map01130 Biosynthesis of antibiotics	3.64488e-06	1.67	KFZ67_09985	103	K	K01647	CS, gltA; citrate synthase [EC:2.3.3.1]	Citrate synthase OS=Photobacterium damselae OX=38293 GN=gltA PE=3 SV=1	gltA	2	0.047713	3	AEYEK(1)FR	1	0.000224622	107.32	1	0.000224622	107.32	1	0.000448139
map01130 Biosynthesis of antibiotics	3.64488e-06	1.67	KFZ67_09985	293	K	K01647	CS, gltA; citrate synthase [EC:2.3.3.1]	Citrate synthase OS=Photobacterium damselae OX=38293 GN=gltA PE=3 SV=1	gltA	3	-0.63837	3	AK(1)DKDDPFR	1	5.99189e-17	139.39	0.999836	8.26491e-05	98.254	1	5.99189e-17
map01130 Biosynthesis of antibiotics	3.64488e-06	1.67	KFZ67_09985	222	K	K01647	CS, gltA; citrate synthase [EC:2.3.3.1]	Citrate synthase OS=Photobacterium damselae OX=38293 GN=gltA PE=3 SV=1	gltA	3	1.6511	4	ALDK(1)IFILHADHEQNASTSTVR	1	2.35004e-29	122.35	1	2.35004e-29	122.35	1	2.28984e-22
map01130 Biosynthesis of antibiotics	3.64488e-06	1.67	KFZ67_10005	273	K	K01835	pgm; phosphoglucomutase [EC:5.4.2.2]	Phosphoglucomutase, alpha-D-glucose phosphate-specific OS=Photobacterium damselae OX=38293 GN=BST98_09950 PE=3 SV=1	BST98_09950	2	1.1601	6	FMSLDK(1)DGVIR	1	0.00024225	77.674	1	0.00597825	50.354	1	0.00024225
map01130 Biosynthesis of antibiotics	3.64488e-06	1.67	KFZ67_10005	525	K	K01835	pgm; phosphoglucomutase [EC:5.4.2.2]	Phosphoglucomutase, alpha-D-glucose phosphate-specific OS=Photobacterium damselae OX=38293 GN=BST98_09950 PE=3 SV=1	BST98_09950	3	0.084306	3	GK(1)EHLALIEK	1	0.000584808	73.435	1	0.000764397	71.176	1	0.000584808
map01130 Biosynthesis of antibiotics	3.64488e-06	1.67	KFZ67_10090	192	K	K00939	adk, AK; adenylate kinase [EC:2.7.4.3]	Adenylate kinase OS=Photobacterium damsela subsp. piscicida OX=38294 GN=adk PE=3 SV=1	adk	2	-1.4596	10	EAAAGNTK(1)YLK	1	1.81736e-07	108.9	1	1.36618e-06	100.69	1	1.81736e-07
map01130 Biosynthesis of antibiotics	3.64488e-06	1.67	KFZ67_10090	50	K	K00939	adk, AK; adenylate kinase [EC:2.7.4.3]	Adenylate kinase OS=Photobacterium damsela subsp. piscicida OX=38294 GN=adk PE=3 SV=1	adk	3	1.591	2	QAK(1)SVIDAGQLVSDDIILGLVK	1	3.67753e-27	111.66	1	3.67753e-27	111.66	1	7.75779e-22
map01130 Biosynthesis of antibiotics	3.64488e-06	1.67	KFZ67_10090	69	K	K00939	adk, AK; adenylate kinase [EC:2.7.4.3]	Adenylate kinase OS=Photobacterium damsela subsp. piscicida OX=38294 GN=adk PE=3 SV=1	adk	3	-0.69598	4	SVIDAGQLVSDDIILGLVK(1)ER	1	7.82897e-35	128.67	1	5.83813e-27	111.66	1	7.82897e-35
map01130 Biosynthesis of antibiotics	3.64488e-06	1.67	KFZ67_10090	145	K	K00939	adk, AK; adenylate kinase [EC:2.7.4.3]	Adenylate kinase OS=Photobacterium damsela subsp. piscicida OX=38294 GN=adk PE=3 SV=1	adk	2	2.7291	3	VEGK(1)DDVTGEDLVVR	1	4.67566e-06	75.911	1	0.000134667	64.565	1	4.67566e-06
map01130 Biosynthesis of antibiotics	3.64488e-06	1.67	KFZ67_10375	366	K	K01782	fadJ; 3-hydroxyacyl-CoA dehydrogenase / enoyl-CoA hydratase / 3-hydroxybutyryl-CoA epimerase [EC:1.1.1.35 4.2.1.17 5.1.2.3]	Fatty acid oxidation complex subunit alpha OS=Photobacterium damselae OX=38293 GN=BST98_10320 PE=3 SV=1	BST98_10320	2	-0.46309	3	IISK(1)AQLQK	1	0.000320728	92.838	1	0.00155125	78.113	1	0.000320728
map01130 Biosynthesis of antibiotics	3.64488e-06	1.67	KFZ67_10375	232	K	K01782	fadJ; 3-hydroxyacyl-CoA dehydrogenase / enoyl-CoA hydratase / 3-hydroxybutyryl-CoA epimerase [EC:1.1.1.35 4.2.1.17 5.1.2.3]	Fatty acid oxidation complex subunit alpha OS=Photobacterium damselae OX=38293 GN=BST98_10320 PE=3 SV=1	BST98_10320	2	0.50631	3	SVVFDQAK(1)K	1	0.00393358	61.78	1	0.00484429	59.908	1	0.00393358
map01130 Biosynthesis of antibiotics	3.64488e-06	1.67	KFZ67_10805	137	K	K01738	cysK; cysteine synthase [EC:2.5.1.47]	Cysteine synthase OS=Photobacterium damselae OX=38293 GN=cysK PE=3 SV=1	cysK	4	0.37114	3	AEEIVASNPSK(1)YLLLQQFNNPANPEIHEK	1	3.10417e-19	94.275	1	3.10417e-19	94.275	1	6.96964e-14
map01130 Biosynthesis of antibiotics	3.64488e-06	1.67	KFZ67_10805	105	K	K01738	cysK; cysteine synthase [EC:2.5.1.47]	Cysteine synthase OS=Photobacterium damselae OX=38293 GN=cysK PE=3 SV=1	cysK	2	1.8253	3	LLK(1)ALGANLELTEAAK	1	2.70028e-08	88.385	1	5.82873e-06	70.197	1	2.70028e-08
map01130 Biosynthesis of antibiotics	3.64488e-06	1.67	KFZ67_11120	345	K	K00600	glyA, SHMT; glycine hydroxymethyltransferase [EC:2.1.2.1]	Serine hydroxymethyltransferase OS=Photobacterium damsela subsp. piscicida OX=38294 GN=glyA PE=3 SV=1	glyA	3	-0.038057	4	EADAALGAANITVNK(1)NSVPNDPR	1	6.56601e-45	143.4	1	6.56601e-45	143.4	1	2.16302e-35
map01130 Biosynthesis of antibiotics	3.64488e-06	1.67	KFZ67_11120	330	K	K00600	glyA, SHMT; glycine hydroxymethyltransferase [EC:2.1.2.1]	Serine hydroxymethyltransferase OS=Photobacterium damsela subsp. piscicida OX=38294 GN=glyA PE=3 SV=1	glyA	3	-0.81801	3	GITGK(1)EADAALGAANITVNK	1	1.61841e-10	82.482	1	1.61841e-10	82.482	1	6.2005e-10
map01130 Biosynthesis of antibiotics	3.64488e-06	1.67	KFZ67_11120	325	K	K00600	glyA, SHMT; glycine hydroxymethyltransferase [EC:2.1.2.1]	Serine hydroxymethyltransferase OS=Photobacterium damsela subsp. piscicida OX=38294 GN=glyA PE=3 SV=1	glyA	3	-0.2402	3	IVSGSTENHLFLVDLIDK(1)GITGK	1	1.83922e-11	83.826	1	2.09806e-07	69.071	1	1.83922e-11
map01130 Biosynthesis of antibiotics	3.64488e-06	1.67	KFZ67_11120	410	K	K00600	glyA, SHMT; glycine hydroxymethyltransferase [EC:2.1.2.1]	Serine hydroxymethyltransferase OS=Photobacterium damsela subsp. piscicida OX=38294 GN=glyA PE=3 SV=1	glyA	2	0.7709	4	VLEICK(1)R	1	1.18019e-06	119.57	1	1.18019e-06	119.57	1	0.000192935
map01130 Biosynthesis of antibiotics	3.64488e-06	1.67	KFZ67_11120	62	K	K00600	glyA, SHMT; glycine hydroxymethyltransferase [EC:2.1.2.1]	Serine hydroxymethyltransferase OS=Photobacterium damsela subsp. piscicida OX=38294 GN=glyA PE=3 SV=1	glyA	2	-0.91322	5	YAEGYPGK(1)R	1	7.58099e-08	120.15	1	1.51613e-07	117.89	1	7.58099e-08
map01130 Biosynthesis of antibiotics	3.64488e-06	1.67	KFZ67_11135	267	K	K01952	PFAS, purL; phosphoribosylformylglycinamidine synthase [EC:6.3.5.3]	Phosphoribosylformylglycinamidine synthase OS=Photobacterium damselae subsp. damselae OX=85581 GN=purL PE=3 SV=1	purL	2	2.2273	7	DNAAVMTGSK(1)VGR	1	0.000164041	72.681	1	0.00029204	70.889	1	0.000164041
map01130 Biosynthesis of antibiotics	3.64488e-06	1.67	KFZ67_11160	120	K	K00121	frmA, ADH5, adhC; S-(hydroxymethyl)glutathione dehydrogenase / alcohol dehydrogenase [EC:1.1.1.284 1.1.1.1]	S-(hydroxymethyl)glutathione dehydrogenase OS=Photobacterium damselae OX=38293 GN=frmA PE=3 SV=1	frmA	2	-1.8535	10	ETQGK(1)GLMPDGTTR	1	0.000119643	71.781	1	0.000334127	61.409	1	0.000119643
map01130 Biosynthesis of antibiotics	3.64488e-06	1.67	KFZ67_11160	323	K	K00121	frmA, ADH5, adhC; S-(hydroxymethyl)glutathione dehydrogenase / alcohol dehydrogenase [EC:1.1.1.284 1.1.1.1]	S-(hydroxymethyl)glutathione dehydrogenase OS=Photobacterium damselae OX=38293 GN=frmA PE=3 SV=1	frmA	2	-0.41474	4	GSAFGGVK(1)GR	1	1.39655e-07	113.67	1	0.000179385	90.15	1	1.39655e-07
map01130 Biosynthesis of antibiotics	3.64488e-06	1.67	KFZ67_11160	107	K	K00121	frmA, ADH5, adhC; S-(hydroxymethyl)glutathione dehydrogenase / alcohol dehydrogenase [EC:1.1.1.284 1.1.1.1]	S-(hydroxymethyl)glutathione dehydrogenase OS=Photobacterium damselae OX=38293 GN=frmA PE=3 SV=1	frmA	2	0.21654	5	SGK(1)TNLCQAVR	1	3.90278e-27	151.66	1	3.90278e-27	151.66	1	2.3838e-19
map01130 Biosynthesis of antibiotics	3.64488e-06	1.67	KFZ67_11160	9	K	K00121	frmA, ADH5, adhC; S-(hydroxymethyl)glutathione dehydrogenase / alcohol dehydrogenase [EC:1.1.1.284 1.1.1.1]	S-(hydroxymethyl)glutathione dehydrogenase OS=Photobacterium damselae OX=38293 GN=frmA PE=3 SV=1	frmA	3	-0.30791	5	SK(1)AAVAWGPNQPLSIEEVDVMLPR	1	1.08452e-51	135.76	1	1.57407e-33	121.38	1	1.08452e-51
map01130 Biosynthesis of antibiotics	3.64488e-06	1.67	KFZ67_11240	16	K	K00940	ndk, NME; nucleoside-diphosphate kinase [EC:2.7.4.6]	Nucleoside diphosphate kinase OS=Photobacterium damselae OX=38293 GN=ndk PE=3 SV=1	ndk	2	0.78342	3	TFSIVKPDAVK(1)R	0.999988	6.46098e-05	90.434	0.999988	6.46098e-05	90.434	0.999405	0.000108127
map01130 Biosynthesis of antibiotics	3.64488e-06	1.67	KFZ67_12030	93	K	K00215	dapB; 4-hydroxy-tetrahydrodipicolinate reductase [EC:1.17.1.8]	4-hydroxy-tetrahydrodipicolinate reductase OS=Photobacterium damselae OX=38293 GN=dapB PE=3 SV=1	dapB	3	0.033065	6	AHQK(1)AIVIGTTGFTEQER	1	1.20668e-15	102.55	1	1.10197e-11	88.637	1	1.20668e-15
map01130 Biosynthesis of antibiotics	3.64488e-06	1.67	KFZ67_12520	3	K	K01478	arcA; arginine deiminase [EC:3.5.3.6]	Arginine deiminase OS=Photobacterium damsela subsp. piscicida OX=38294 GN=arcA PE=3 SV=1	arcA	2	-2.107	5	SK(1)FYVGSEIGQLR	1	1.51683e-09	101.53	1	1.51683e-09	101.53	1	1.55416e-09
map01130 Biosynthesis of antibiotics	3.64488e-06	1.67	KFZ67_12530	35	K	K00611	OTC, argF, argI; ornithine carbamoyltransferase [EC:2.1.3.3]	Ornithine carbamoyltransferase OS=Photobacterium damselae OX=38293 GN=argF PE=3 SV=1	argF	2	-0.58233	9	AK(1)YNGYEQPR	1	3.62913e-05	99.283	1	0.000103609	94.363	1	3.62913e-05
map01130 Biosynthesis of antibiotics	3.64488e-06	1.67	KFZ67_12530	32	K	K00611	OTC, argF, argI; ornithine carbamoyltransferase [EC:2.1.3.3]	Ornithine carbamoyltransferase OS=Photobacterium damselae OX=38293 GN=argF PE=3 SV=1	argF	3	0.017327	7	EIQHLLELSAELK(1)K	1	3.10418e-10	105.19	1	4.34422e-07	92.939	1	3.10418e-10
map01130 Biosynthesis of antibiotics	3.64488e-06	1.67	KFZ67_12530	292	K	K00611	OTC, argF, argI; ornithine carbamoyltransferase [EC:2.1.3.3]	Ornithine carbamoyltransferase OS=Photobacterium damselae OX=38293 GN=argF PE=3 SV=1	argF	2	0.39978	4	ELAK(1)EYPVLAK	1	0.00110751	65.842	1	0.00110751	65.842	1	0.00110751
map01130 Biosynthesis of antibiotics	3.64488e-06	1.67	KFZ67_12530	153	K	K00611	OTC, argF, argI; ornithine carbamoyltransferase [EC:2.1.3.3]	Ornithine carbamoyltransferase OS=Photobacterium damselae OX=38293 GN=argF PE=3 SV=1	argF	3	0.16513	4	GK(1)QLHEITFAYLGDAR	1	1.88664e-22	127.2	1	1.88664e-22	127.2	1	1.88664e-22
map01130 Biosynthesis of antibiotics	3.64488e-06	1.67	KFZ67_12530	263	K	K00611	OTC, argF, argI; ornithine carbamoyltransferase [EC:2.1.3.3]	Ornithine carbamoyltransferase OS=Photobacterium damselae OX=38293 GN=argF PE=3 SV=1	argF	3	1.565	3	INLMLPYQVNMDVIK(1)ATGNPHVK	1	0.000129028	47.564	1	0.000169205	46.818	1	0.000129028
map01130 Biosynthesis of antibiotics	3.64488e-06	1.67	KFZ67_12530	47	K	K00611	OTC, argF, argI; ornithine carbamoyltransferase [EC:2.1.3.3]	Ornithine carbamoyltransferase OS=Photobacterium damselae OX=38293 GN=argF PE=3 SV=1	argF	2	2.2113	2	LTGK(1)NIALIFEK	1	1.70535e-07	107.2	1	1.70535e-07	107.2	1	2.78475e-06
map01130 Biosynthesis of antibiotics	3.64488e-06	1.67	KFZ67_12530	55	K	K00611	OTC, argF, argI; ornithine carbamoyltransferase [EC:2.1.3.3]	Ornithine carbamoyltransferase OS=Photobacterium damselae OX=38293 GN=argF PE=3 SV=1	argF	2	-0.79345	4	NIALIFEK(1)TSTR	1	6.04315e-48	172.13	1	6.04315e-48	172.13	1	1.18538e-37
map01130 Biosynthesis of antibiotics	3.64488e-06	1.67	KFZ67_12730	434	K	K00873	PK, pyk; pyruvate kinase [EC:2.7.1.40]	Pyruvate kinase OS=Photobacterium damsela subsp. piscicida OX=38294 GN=pykF PE=3 SV=1	pykF	2	0.11361	2	GK(1)ELALETGLGAK	1	0.000105945	78.814	1	0.000105945	78.814	1	0.000137832
map01130 Biosynthesis of antibiotics	3.64488e-06	1.67	KFZ67_12730	360	K	K00873	PK, pyk; pyruvate kinase [EC:2.7.1.40]	Pyruvate kinase OS=Photobacterium damsela subsp. piscicida OX=38294 GN=pykF PE=3 SV=1	pykF	2	1.4009	5	ITEAVCK(1)GAVDTAEK	1	1.75211e-22	131.86	1	1.75211e-22	131.86	1	1.90816e-17
map01130 Biosynthesis of antibiotics	3.64488e-06	1.67	KFZ67_12730	389	K	K00873	PK, pyk; pyruvate kinase [EC:2.7.1.40]	Pyruvate kinase OS=Photobacterium damsela subsp. piscicida OX=38294 GN=pykF PE=3 SV=1	pykF	2	-1.2335	3	K(1)YFPTAR	1	4.84642e-11	133.81	1	4.84642e-11	133.81	1	2.52483e-10
map01130 Biosynthesis of antibiotics	3.64488e-06	1.67	KFZ67_12730	59	K	K00873	PK, pyk; pyruvate kinase [EC:2.7.1.40]	Pyruvate kinase OS=Photobacterium damsela subsp. piscicida OX=38294 GN=pykF PE=3 SV=1	pykF	2	0.23093	3	NTGK(1)QLAILLDTK	1	0.00035064	69.516	1	0.00160987	51.03	1	0.00035064
map01130 Biosynthesis of antibiotics	3.64488e-06	1.67	KFZ67_12890	142	K	K00024	mdh; malate dehydrogenase [EC:1.1.1.37]	Malate dehydrogenase OS=Photobacterium damselae subsp. damselae OX=85581 GN=mdh PE=3 SV=1	mdh	2	-2.2154	3	K(1)LFGITTLDVIR	1	1.83179e-27	149.23	1	1.83179e-27	149.23	1	4.2682e-20
map01130 Biosynthesis of antibiotics	3.64488e-06	1.67	KFZ67_12890	162	K	K00024	mdh; malate dehydrogenase [EC:1.1.1.37]	Malate dehydrogenase OS=Photobacterium damselae subsp. damselae OX=85581 GN=mdh PE=3 SV=1	mdh	2	0.97471	3	SETFVAELK(1)GK	1	0.000294285	75.819	1	0.00106502	66.267	1	0.000294285
map01130 Biosynthesis of antibiotics	3.64488e-06	1.67	KFZ67_12890	21	K	K00024	mdh; malate dehydrogenase [EC:1.1.1.37]	Malate dehydrogenase OS=Photobacterium damselae subsp. damselae OX=85581 GN=mdh PE=3 SV=1	mdh	3	-0.24109	3	VAVIGAAGGIGQALALLLK(1)NR	1	2.19203e-53	148.41	1	2.23028e-27	118.31	1	2.19203e-53
map01130 Biosynthesis of antibiotics	3.64488e-06	1.67	KFZ67_12920	223	K	K03841	FBP, fbp; fructose-1,6-bisphosphatase I [EC:3.1.3.11]	Fructose-1,6-bisphosphatase class 1 OS=Photobacterium damsela subsp. piscicida OX=38294 GN=fbp PE=3 SV=1	fbp	2	-0.01092	3	FPQGIK(1)QYIK	1	1.92789e-05	104.39	1	9.56732e-05	94.804	1	1.92789e-05
map01130 Biosynthesis of antibiotics	3.64488e-06	1.67	KFZ67_12920	325	K	K03841	FBP, fbp; fructose-1,6-bisphosphatase I [EC:3.1.3.11]	Fructose-1,6-bisphosphatase class 1 OS=Photobacterium damsela subsp. piscicida OX=38294 GN=fbp PE=3 SV=1	fbp	2	-1.9314	5	NMVK(1)QVEDYLER	1	4.27257e-07	102.73	1	8.51511e-06	88.163	1	4.27257e-07
map01130 Biosynthesis of antibiotics	3.64488e-06	1.67	KFZ67_12920	33	K	K03841	FBP, fbp; fructose-1,6-bisphosphatase I [EC:3.1.3.11]	Fructose-1,6-bisphosphatase class 1 OS=Photobacterium damsela subsp. piscicida OX=38294 GN=fbp PE=3 SV=1	fbp	3	-2.1513	2	QNDFPHASGELSSLLGSIK(1)LAAK	1	5.65823e-07	61.963	1	5.65823e-07	61.963	1	2.83731e-05
map01130 Biosynthesis of antibiotics	3.64488e-06	1.67	KFZ67_13115	362	K	K00956	cysN; sulfate adenylyltransferase subunit 1 [EC:2.7.7.4]	Sulfate adenylyltransferase subunit 1 OS=Photobacterium damselae OX=38293 GN=cysN PE=3 SV=1	cysN	3	1.2031	5	IAGNK(1)TQGQVIGFEHQIDINK	1	5.92562e-11	82.635	1	6.81326e-07	64.522	1	5.92562e-11
map01130 Biosynthesis of antibiotics	3.64488e-06	1.67	KFZ67_13115	459	K	K00956	cysN; sulfate adenylyltransferase subunit 1 [EC:2.7.7.4]	Sulfate adenylyltransferase subunit 1 OS=Photobacterium damselae OX=38293 GN=cysN PE=3 SV=1	cysN	3	-0.477	3	K(1)HFPHWNSSDISK	1	0.000240764	70.563	1	0.000278187	70.438	1	0.000240764
map01130 Biosynthesis of antibiotics	3.64488e-06	1.67	KFZ67_13115	24	K	K00956	cysN; sulfate adenylyltransferase subunit 1 [EC:2.7.7.4]	Sulfate adenylyltransferase subunit 1 OS=Photobacterium damselae OX=38293 GN=cysN PE=3 SV=1	cysN	4	-0.41155	3	MNHAIQQQVAELGIEAYLDQHQNK(1)SLLR	1	7.1067e-36	119.87	1	3.02955e-35	111.55	1	7.1067e-36
map01130 Biosynthesis of antibiotics	3.64488e-06	1.67	KFZ67_13115	278	K	K00956	cysN; sulfate adenylyltransferase subunit 1 [EC:2.7.7.4]	Sulfate adenylyltransferase subunit 1 OS=Photobacterium damselae OX=38293 GN=cysN PE=3 SV=1	cysN	2	-0.79996	2	VK(1)VLPSEK	1	5.78584e-05	105.1	1	0.000131841	98.582	1	5.78584e-05
map01130 Biosynthesis of antibiotics	3.64488e-06	1.67	KFZ67_13115	284	K	K00956	cysN; sulfate adenylyltransferase subunit 1 [EC:2.7.7.4]	Sulfate adenylyltransferase subunit 1 OS=Photobacterium damselae OX=38293 GN=cysN PE=3 SV=1	cysN	2	0.8084	4	VLPSEK(1)ESYIER	1	9.67751e-14	125.54	1	9.67751e-14	125.54	1	1.02819e-05
map01130 Biosynthesis of antibiotics	3.64488e-06	1.67	KFZ67_13115	105	K	K00956	cysN; sulfate adenylyltransferase subunit 1 [EC:2.7.7.4]	Sulfate adenylyltransferase subunit 1 OS=Photobacterium damselae OX=38293 GN=cysN PE=3 SV=1	cysN	2	0.17473	2	YFSTQK(1)R	1	0.000192935	107.43	1	0.000192935	107.43	1	0.000263532
map01130 Biosynthesis of antibiotics	3.64488e-06	1.67	KFZ67_13120	115	K	K00957	cysD; sulfate adenylyltransferase subunit 2 [EC:2.7.7.4]	Sulfate adenylyltransferase subunit 2 OS=Photobacterium damselae OX=38293 GN=cysD PE=3 SV=1	cysD	2	2.5314	5	HTDIMK(1)TQALK	1	2.56317e-27	154.28	1	2.56317e-27	154.28	1	2.47953e-13
map01130 Biosynthesis of antibiotics	3.64488e-06	1.67	KFZ67_13120	120	K	K00957	cysD; sulfate adenylyltransferase subunit 2 [EC:2.7.7.4]	Sulfate adenylyltransferase subunit 2 OS=Photobacterium damselae OX=38293 GN=cysD PE=3 SV=1	cysD	3	1.5478	3	TQALK(1)QALNQYGFDAAFGGAR	1	5.69251e-27	111.93	1	5.69251e-27	111.93	1	4.02357e-21
map01130 Biosynthesis of antibiotics	3.64488e-06	1.67	KFZ67_13120	82	K	K00957	cysD; sulfate adenylyltransferase subunit 2 [EC:2.7.7.4]	Sulfate adenylyltransferase subunit 2 OS=Photobacterium damselae OX=38293 GN=cysD PE=3 SV=1	cysD	3	0.25407	5	K(1)YGFELLVHK	1	0.000633938	73.499	1	0.000633938	73.499	1	0.000633938
[truncated: 608 more rows]

## Sheet: ident
KEGG pathway	Mapping	Background	All Mapping	All Background	Fold Enrichment	Fisher's exact test p value	-log10(p value)	Log2 Fold enrichment	Related proteins
[truncated: 20 more rows]
