# Supplementary material for: Global analysis of protein lysine lactylation profiles in the marine bacterium Photobacterium damselae subsp. damselae
Source: Front Microbiol. 2025 Jun 17;16:1539893. doi: 10.3389/fmicb.2025.1539893 (PMC12209183; doi:10.3389/fmicb.2025.1539893)
Supplement: Supplementary file 8 [file Table_7.xlsx]

## Sheet: networks
Table S7. The PPI network analysis of Klac-modified proteins in P. damselae
#node1	node2	node1_string_id	node2_string_id	neighborhood_on_chromosome	gene_fusion	phylogenetic_cooccurrence	homology	coexpression	experimentally_determined_interaction	database_annotated	automated_textmining	combined_score
ARR48224.1	ARR48225.1	85581.CAY62_00590	85581.CAY62_00595	0.785	0	0.75	0	0.887	0.885	0.984	0.337	0.999
ARR48224.1	accD	85581.CAY62_00590	85581.CAY62_09760	0.103	0.695	0.758	0	0.283	0.704	0.964	0.337	0.999
ARR48225.1	ARR48224.1	85581.CAY62_00595	85581.CAY62_00590	0.785	0	0.75	0	0.887	0.885	0.984	0.337	0.999
ARR48225.1	accD	85581.CAY62_00595	85581.CAY62_09760	0.154	0	0.773	0	0.904	0.731	0.984	0.337	0.999
ARR48225.1	accA	85581.CAY62_00595	85581.CAY62_11020	0.154	0	0.773	0	0.454	0.731	0.984	0.337	0.999
ARR48239.1	groES	85581.CAY62_00670	85581.CAY62_00665	0.678	0	0.757	0	0.904	0.885	0.513	0.337	0.999
ARR48245.1	ARR48841.1	85581.CAY62_00700	85581.CAY62_04130	0.095	0	0	0	0.786	0.853	0.965	0.183	0.999
ARR48245.1	sdhA	85581.CAY62_00700	85581.CAY62_04140	0.075	0	0.767	0	0.664	0.847	0.958	0.124	0.999
ARR48294.1	cysD	85581.CAY62_01070	85581.CAY62_01065	0.781	0.064	0.774	0	0.904	0.852	0.942	0.337	0.999
ARR48294.1	ARR48296.1	85581.CAY62_01070	85581.CAY62_01080	0.751	0.9	0.376	0	0.904	0	0.9	0.337	0.999
ARR48296.1	cysH	85581.CAY62_01080	85581.CAY62_01030	0.102	0.512	0.339	0	0.857	0.742	0.933	0.337	0.999
ARR48296.1	cysD	85581.CAY62_01080	85581.CAY62_01065	0.733	0.104	0.366	0	0.904	0.742	0.933	0.337	0.999
ARR48296.1	ARR48294.1	85581.CAY62_01080	85581.CAY62_01070	0.751	0.9	0.376	0	0.904	0	0.9	0.337	0.999
ARR48598.1	iscS	85581.CAY62_02840	85581.CAY62_02835	0.689	0	0.765	0	0.904	0.885	0.687	0.337	0.999
ARR48632.1	ribB	85581.CAY62_03020	85581.CAY62_03030	0.762	0.26	0.773	0	0.985	0.85	0.9	0.472	0.999
ARR48633.1	ribB	85581.CAY62_03025	85581.CAY62_03030	0.745	0.862	0.773	0	0.973	0.091	0	0.372	0.999
ARR48682.1	napA	85581.CAY62_03280	85581.CAY62_03275	0.618	0	0.774	0	0.883	0.734	0.927	0.305	0.999
ARR48713.1	ARR48716.1	85581.CAY62_03450	85581.CAY62_03470	0.631	0	0.648	0	0.996	0	0	0.389	0.999
ARR48716.1	ARR48713.1	85581.CAY62_03470	85581.CAY62_03450	0.631	0	0.648	0	0.996	0	0	0.389	0.999
ARR48716.1	flgG	85581.CAY62_03470	85581.CAY62_03455	0.655	0	0.257	0	0.997	0.102	0	0.389	0.999
ARR48716.1	flgH	85581.CAY62_03470	85581.CAY62_03460	0.667	0	0.688	0	0.999	0	0	0.388	0.999
ARR48716.1	flgI	85581.CAY62_03470	85581.CAY62_03465	0.777	0	0.625	0	0.999	0	0	0.389	0.999
ARR48841.1	ARR48245.1	85581.CAY62_04130	85581.CAY62_00700	0.095	0	0	0	0.786	0.853	0.965	0.183	0.999
ARR48841.1	sdhA	85581.CAY62_04130	85581.CAY62_04140	0.799	0	0.473	0	0.786	0.853	0.966	0.183	0.999
ARR48841.1	ARR48842.1	85581.CAY62_04130	85581.CAY62_04135	0.799	0	0.747	0	0.904	0.884	0.972	0.337	0.999
ARR48841.1	sdhB	85581.CAY62_04130	85581.CAY62_04145	0.767	0	0.481	0	0.786	0.853	0.965	0.201	0.999
ARR48842.1	ARR48841.1	85581.CAY62_04135	85581.CAY62_04130	0.799	0	0.747	0	0.904	0.884	0.972	0.337	0.999
ARR48842.1	sdhB	85581.CAY62_04135	85581.CAY62_04145	0.767	0	0.278	0	0.752	0.851	0.9	0.195	0.999
ARR48868.1	ARR48869.1	85581.CAY62_04270	85581.CAY62_04275	0.743	0	0.773	0	0.901	0.885	0	0.337	0.999
ARR48869.1	ARR48868.1	85581.CAY62_04275	85581.CAY62_04270	0.743	0	0.773	0	0.901	0.885	0	0.337	0.999
ARR49813.1	clpP	85581.CAY62_09665	85581.CAY62_09670	0.569	0.236	0.727	0	0.754	0.885	0.851	0.337	0.999
ARR49982.1	purD	85581.CAY62_10815	85581.CAY62_00515	0.154	0.9	0.759	0	0.904	0	0.9	0.337	0.999
ARR49982.1	purH	85581.CAY62_10815	85581.CAY62_00520	0.154	0.9	0.705	0	0.904	0.092	0.9	0.337	0.999
ARR49982.1	purL	85581.CAY62_10815	85581.CAY62_02995	0.245	0	0.155	0	0.999	0	0.9	0.389	0.999
ARR49982.1	purM	85581.CAY62_10815	85581.CAY62_10810	0.799	0.9	0.764	0	0.904	0	0	0.337	0.999
ARR50136.1	gcvT	85581.CAY62_11775	85581.CAY62_16820	0.095	0	0.768	0	0.786	0.742	0.967	0.183	0.999
ARR50136.1	gcvP	85581.CAY62_11775	85581.CAY62_16830	0.237	0	0.607	0	0.982	0.113	0.985	0.377	0.999
ARR50334.1	rpsB	85581.CAY62_12950	85581.CAY62_11100	0.154	0	0.159	0	0.904	0.885	0.851	0.337	0.999
ARR50334.1	rpsD	85581.CAY62_12950	85581.CAY62_12835	0.283	0	0.355	0	0.904	0.885	0.851	0.337	0.999
ARR50334.1	rpsK	85581.CAY62_12950	85581.CAY62_12840	0.293	0	0.241	0	0.904	0.885	0.851	0.337	0.999
ARR50334.1	rpsM	85581.CAY62_12950	85581.CAY62_12845	0.298	0	0.154	0	0.904	0.885	0.851	0.337	0.999
ARR50334.1	rpsE	85581.CAY62_12950	85581.CAY62_12870	0.385	0	0.178	0	0.904	0.885	0.851	0.337	0.999
ARR50334.1	rpsH	85581.CAY62_12950	85581.CAY62_12885	0.393	0	0.314	0	0.904	0.885	0.851	0.337	0.999
ARR50334.1	rpsN	85581.CAY62_12950	85581.CAY62_12890	0.426	0	0	0	0.904	0.885	0.851	0.337	0.999
ARR50334.1	rpsQ	85581.CAY62_12950	85581.CAY62_12910	0.656	0	0.2	0	0.904	0.885	0.851	0.337	0.999
ARR50334.1	rpmC	85581.CAY62_12950	85581.CAY62_12915	0.656	0	0	0	0.904	0.885	0.675	0.337	0.999
ARR50334.1	rplP	85581.CAY62_12950	85581.CAY62_12920	0.656	0	0.264	0	0.904	0.885	0.851	0.337	0.999
ARR50334.1	rpsC	85581.CAY62_12950	85581.CAY62_12925	0.663	0	0.287	0	0.904	0.885	0.851	0.337	0.999
ARR50334.1	rplV	85581.CAY62_12950	85581.CAY62_12930	0.7	0	0.523	0	0.904	0.885	0.708	0.337	0.999
ARR50334.1	rpsS	85581.CAY62_12950	85581.CAY62_12935	0.721	0	0.346	0	0.904	0.885	0.851	0.337	0.999
ARR50334.1	rplB	85581.CAY62_12950	85581.CAY62_12940	0.759	0	0.45	0	0.904	0.885	0.408	0.337	0.999
ARR50334.1	rplW	85581.CAY62_12950	85581.CAY62_12945	0.799	0	0.185	0	0.904	0.885	0.729	0.337	0.999
ARR50334.1	rpsJ	85581.CAY62_12950	85581.CAY62_12960	0.745	0	0.397	0	0.904	0.885	0.851	0.337	0.999
ARR50334.1	rpsG	85581.CAY62_12950	85581.CAY62_12975	0.154	0	0.172	0	0.904	0.885	0.851	0.337	0.999
ARR50334.1	rpsL	85581.CAY62_12950	85581.CAY62_12980	0.154	0	0.278	0	0.904	0.885	0.851	0.336	0.999
ARR50334.1	rplC	85581.CAY62_12950	85581.CAY62_12955	0.767	0	0.574	0	0.904	0.885	0.357	0.337	0.999
ARR50596.1	purL	85581.CAY62_14470	85581.CAY62_02995	0.245	0	0.228	0	0.999	0	0	0.389	0.999
ARR50596.1	purE	85581.CAY62_14470	85581.CAY62_14475	0.799	0.9	0.76	0	0.904	0	0.9	0.337	0.999
accA	ARR48225.1	85581.CAY62_11020	85581.CAY62_00595	0.154	0	0.773	0	0.454	0.731	0.984	0.337	0.999
accA	accD	85581.CAY62_11020	85581.CAY62_09760	0.154	0.9	0.774	0	0.901	0.885	0.984	0.337	0.999
accD	ARR48224.1	85581.CAY62_09760	85581.CAY62_00590	0.103	0.695	0.758	0	0.283	0.704	0.964	0.337	0.999
accD	ARR48225.1	85581.CAY62_09760	85581.CAY62_00595	0.154	0	0.773	0	0.904	0.731	0.984	0.337	0.999
accD	accA	85581.CAY62_09760	85581.CAY62_11020	0.154	0.9	0.774	0	0.901	0.885	0.984	0.337	0.999
aceE	aceF	85581.CAY62_12205	85581.CAY62_12200	0.775	0.005	0.735	0	0.676	0.691	0.946	0.197	0.999
aceF	aceE	85581.CAY62_12200	85581.CAY62_12205	0.775	0.005	0.735	0	0.676	0.691	0.946	0.197	0.999
atpA	atpG	85581.CAY62_14305	85581.CAY62_14310	0.641	0.179	0.774	0	0.664	0.847	0.851	0.124	0.999
atpC	atpG	85581.CAY62_14320	85581.CAY62_14310	0.643	0	0.707	0	0.78	0.853	0.851	0.183	0.999
atpG	atpA	85581.CAY62_14310	85581.CAY62_14305	0.641	0.179	0.774	0	0.664	0.847	0.851	0.124	0.999
atpG	atpC	85581.CAY62_14310	85581.CAY62_14320	0.643	0	0.707	0	0.78	0.853	0.851	0.183	0.999
carA	pyrB	85581.CAY62_02010	85581.CAY62_01500	0.154	0.9	0.266	0	0.904	0	0.9	0.337	0.999
carA	carB	85581.CAY62_02010	85581.CAY62_02015	0.759	0.9	0.774	0	0.904	0.885	0.949	0.337	0.999
carB	pyrB	85581.CAY62_02015	85581.CAY62_01500	0.154	0.9	0.294	0	0.904	0	0.9	0.337	0.999
carB	carA	85581.CAY62_02015	85581.CAY62_02010	0.759	0.9	0.774	0	0.904	0.885	0.949	0.337	0.999
clpP	ARR49813.1	85581.CAY62_09670	85581.CAY62_09665	0.569	0.236	0.727	0	0.754	0.885	0.851	0.337	0.999
cysD	ARR48294.1	85581.CAY62_01065	85581.CAY62_01070	0.781	0.064	0.774	0	0.904	0.852	0.942	0.337	0.999
cysD	ARR48296.1	85581.CAY62_01065	85581.CAY62_01080	0.733	0.104	0.366	0	0.904	0.742	0.933	0.337	0.999
cysH	ARR48296.1	85581.CAY62_01030	85581.CAY62_01080	0.102	0.512	0.339	0	0.857	0.742	0.933	0.337	0.999
flgG	ARR48716.1	85581.CAY62_03455	85581.CAY62_03470	0.655	0	0.257	0	0.997	0.102	0	0.389	0.999
flgH	ARR48716.1	85581.CAY62_03460	85581.CAY62_03470	0.667	0	0.688	0	0.999	0	0	0.388	0.999
flgH	flgI	85581.CAY62_03460	85581.CAY62_03465	0.664	0	0.774	0	0.904	0.855	0	0.337	0.999
flgI	flgH	85581.CAY62_03465	85581.CAY62_03460	0.664	0	0.774	0	0.904	0.855	0	0.337	0.999
flgI	ARR48716.1	85581.CAY62_03465	85581.CAY62_03470	0.777	0	0.625	0	0.999	0	0	0.389	0.999
gcvH	gcvT	85581.CAY62_16825	85581.CAY62_16820	0.461	0	0.769	0	0.786	0.742	0.967	0.183	0.999
gcvH	gcvP	85581.CAY62_16825	85581.CAY62_16830	0.602	0	0.582	0	0.982	0.113	0.985	0.377	0.999
gcvP	ARR50136.1	85581.CAY62_16830	85581.CAY62_11775	0.237	0	0.607	0	0.982	0.113	0.985	0.377	0.999
gcvP	gcvT	85581.CAY62_16830	85581.CAY62_16820	0.448	0.642	0.743	0	0.999	0.1	0.985	0.389	0.999
gcvP	gcvH	85581.CAY62_16830	85581.CAY62_16825	0.602	0	0.582	0	0.982	0.113	0.985	0.377	0.999
gcvT	ARR50136.1	85581.CAY62_16820	85581.CAY62_11775	0.095	0	0.768	0	0.786	0.742	0.967	0.183	0.999
gcvT	gcvH	85581.CAY62_16820	85581.CAY62_16825	0.461	0	0.769	0	0.786	0.742	0.967	0.183	0.999
gcvT	gcvP	85581.CAY62_16820	85581.CAY62_16830	0.448	0.642	0.743	0	0.999	0.1	0.985	0.389	0.999
glyQ	glyS	85581.CAY62_14125	85581.CAY62_14130	0.79	0.9	0.774	0	0.904	0.876	0.927	0.089	0.999
glyS	glyQ	85581.CAY62_14130	85581.CAY62_14125	0.79	0.9	0.774	0	0.904	0.876	0.927	0.089	0.999
groES	ARR48239.1	85581.CAY62_00665	85581.CAY62_00670	0.678	0	0.757	0	0.904	0.885	0.513	0.337	0.999
guaA	guaB	85581.CAY62_02945	85581.CAY62_02940	0.705	0	0.667	0	0.999	0.185	0.9	0.544	0.999
guaB	guaA	85581.CAY62_02940	85581.CAY62_02945	0.705	0	0.667	0	0.999	0.185	0.9	0.544	0.999
hslU	hslV	85581.CAY62_13285	85581.CAY62_13280	0.785	0	0.774	0	0.904	0.885	0.851	0.337	0.999
hslV	hslU	85581.CAY62_13280	85581.CAY62_13285	0.785	0	0.774	0	0.904	0.885	0.851	0.337	0.999
infA	rpsH	85581.CAY62_09120	85581.CAY62_12885	0.154	0	0.679	0	0.904	0.885	0.678	0.337	0.999
iscS	ARR48598.1	85581.CAY62_02835	85581.CAY62_02840	0.689	0	0.765	0	0.904	0.885	0.687	0.337	0.999
lipA	lipB	85581.CAY62_10715	85581.CAY62_10710	0.799	0.899	0.764	0	0.056	0	0.9	0.337	0.999
lipB	lipA	85581.CAY62_10710	85581.CAY62_10715	0.799	0.899	0.764	0	0.056	0	0.9	0.337	0.999
napA	ARR48682.1	85581.CAY62_03275	85581.CAY62_03280	0.618	0	0.774	0	0.883	0.734	0.927	0.305	0.999
pheS	pheT	85581.CAY62_07775	85581.CAY62_07770	0.78	0	0.669	0	0.984	0.886	0.985	0.381	0.999
pheT	pheS	85581.CAY62_07770	85581.CAY62_07775	0.78	0	0.669	0	0.984	0.886	0.985	0.381	0.999
potC	potD	85581.CAY62_06475	85581.CAY62_06465	0.296	0.899	0.774	0	0.713	0	0.946	0.152	0.999
potD	potC	85581.CAY62_06465	85581.CAY62_06475	0.296	0.899	0.774	0	0.713	0	0.946	0.152	0.999
purC	purL	85581.CAY62_04945	85581.CAY62_02995	0.245	0	0	0	0.999	0.102	0	0.389	0.999
purD	ARR49982.1	85581.CAY62_00515	85581.CAY62_10815	0.154	0.9	0.759	0	0.904	0	0.9	0.337	0.999
purD	purL	85581.CAY62_00515	85581.CAY62_02995	0.245	0.049	0.27	0	0.999	0	0	0.389	0.999
purE	purL	85581.CAY62_14475	85581.CAY62_02995	0.245	0	0.195	0	0.999	0	0	0.389	0.999
purE	ARR50596.1	85581.CAY62_14475	85581.CAY62_14470	0.799	0.9	0.76	0	0.904	0	0.9	0.337	0.999
purF	purL	85581.CAY62_09740	85581.CAY62_02995	0.245	0	0.388	0	0.999	0.093	0	0.389	0.999
purH	purL	85581.CAY62_00520	85581.CAY62_02995	0.245	0	0	0	0.999	0	0	0.389	0.999
purH	ARR49982.1	85581.CAY62_00520	85581.CAY62_10815	0.154	0.9	0.705	0	0.904	0.092	0.9	0.337	0.999
purL	purD	85581.CAY62_02995	85581.CAY62_00515	0.245	0.049	0.27	0	0.999	0	0	0.389	0.999
purL	purH	85581.CAY62_02995	85581.CAY62_00520	0.245	0	0	0	0.999	0	0	0.389	0.999
purL	purC	85581.CAY62_02995	85581.CAY62_04945	0.245	0	0	0	0.999	0.102	0	0.389	0.999
purL	purF	85581.CAY62_02995	85581.CAY62_09740	0.245	0	0.388	0	0.999	0.093	0	0.389	0.999
purL	purE	85581.CAY62_02995	85581.CAY62_14475	0.245	0	0.195	0	0.999	0	0	0.389	0.999
purL	purT	85581.CAY62_02995	85581.CAY62_06890	0.245	0	0	0	0.983	0	0.9	0.389	0.999
purL	purM	85581.CAY62_02995	85581.CAY62_10810	0.245	0	0.151	0	0.999	0	0.9	0.389	0.999
purL	ARR49982.1	85581.CAY62_02995	85581.CAY62_10815	0.245	0	0.155	0	0.999	0	0.9	0.389	0.999
purL	ARR50596.1	85581.CAY62_02995	85581.CAY62_14470	0.245	0	0.228	0	0.999	0	0	0.389	0.999
purM	purL	85581.CAY62_10810	85581.CAY62_02995	0.245	0	0.151	0	0.999	0	0.9	0.389	0.999
purM	ARR49982.1	85581.CAY62_10810	85581.CAY62_10815	0.799	0.9	0.764	0	0.904	0	0	0.337	0.999
purT	purL	85581.CAY62_06890	85581.CAY62_02995	0.245	0	0	0	0.983	0	0.9	0.389	0.999
pyrB	pyrI	85581.CAY62_01500	85581.CAY62_01495	0.755	0.61	0.772	0	0.904	0.885	0.927	0.333	0.999
pyrB	carA	85581.CAY62_01500	85581.CAY62_02010	0.154	0.9	0.266	0	0.904	0	0.9	0.337	0.999
pyrB	carB	85581.CAY62_01500	85581.CAY62_02015	0.154	0.9	0.294	0	0.904	0	0.9	0.337	0.999
pyrI	pyrB	85581.CAY62_01495	85581.CAY62_01500	0.755	0.61	0.772	0	0.904	0.885	0.927	0.333	0.999
ribB	ARR48632.1	85581.CAY62_03030	85581.CAY62_03020	0.762	0.26	0.773	0	0.985	0.85	0.9	0.472	0.999
ribB	ARR48633.1	85581.CAY62_03030	85581.CAY62_03025	0.745	0.862	0.773	0	0.973	0.091	0	0.372	0.999
ribB	ribH	85581.CAY62_03030	85581.CAY62_03040	0.242	0	0.773	0	0.992	0	0.906	0.384	0.999
ribH	ribB	85581.CAY62_03040	85581.CAY62_03030	0.242	0	0.773	0	0.992	0	0.906	0.384	0.999
rplA	rplK	85581.CAY62_00445	85581.CAY62_00440	0.799	0.208	0.655	0	0.904	0.885	0	0.337	0.999
rplA	rpsL	85581.CAY62_00445	85581.CAY62_12980	0.154	0	0.225	0	0.904	0.885	0.838	0.337	0.999
rplA	rplB	85581.CAY62_00445	85581.CAY62_12940	0.154	0	0.183	0	0.904	0.885	0.849	0.337	0.999
rplA	rplE	85581.CAY62_00445	85581.CAY62_12895	0.154	0	0.481	0	0.904	0.885	0.778	0.337	0.999
rplB	rplA	85581.CAY62_12940	85581.CAY62_00445	0.154	0	0.183	0	0.904	0.885	0.849	0.337	0.999
rplB	rplE	85581.CAY62_12940	85581.CAY62_12895	0.452	0	0.687	0	0.904	0.885	0.83	0.337	0.999
rplB	rplN	85581.CAY62_12940	85581.CAY62_12905	0.469	0	0.686	0	0.904	0.885	0.584	0.337	0.999
rplB	rplP	85581.CAY62_12940	85581.CAY62_12920	0.689	0	0.695	0	0.904	0.885	0.424	0.337	0.999
rplB	rpsC	85581.CAY62_12940	85581.CAY62_12925	0.697	0	0.732	0	0.904	0.885	0.412	0.337	0.999
rplB	rplV	85581.CAY62_12940	85581.CAY62_12930	0.737	0	0.558	0	0.904	0.885	0.616	0.337	0.999
rplB	rpsS	85581.CAY62_12940	85581.CAY62_12935	0.759	0	0.767	0	0.904	0.885	0.41	0.337	0.999
rplB	rpsJ	85581.CAY62_12940	85581.CAY62_12960	0.708	0	0.526	0	0.904	0.885	0.438	0.337	0.999
rplB	ARR50334.1	85581.CAY62_12940	85581.CAY62_12950	0.759	0	0.45	0	0.904	0.885	0.408	0.337	0.999
rplB	rpsL	85581.CAY62_12940	85581.CAY62_12980	0.154	0	0.604	0	0.904	0.885	0.851	0.337	0.999
rplB	rplC	85581.CAY62_12940	85581.CAY62_12955	0.729	0	0.669	0	0.904	0.885	0.584	0.337	0.999
rplC	rplO	85581.CAY62_12955	85581.CAY62_12860	0.376	0	0.497	0	0.904	0.885	0.729	0.337	0.999
rplC	rplF	85581.CAY62_12955	85581.CAY62_12880	0.38	0	0.484	0	0.904	0.885	0.721	0.337	0.999
rplC	rplP	85581.CAY62_12955	85581.CAY62_12920	0.633	0	0.531	0	0.904	0.885	0.727	0.337	0.999
rplC	rplV	85581.CAY62_12955	85581.CAY62_12930	0.674	0	0.685	0	0.904	0.885	0.726	0.337	0.999
rplC	rpsS	85581.CAY62_12955	85581.CAY62_12935	0.693	0	0.55	0	0.904	0.885	0.343	0.337	0.999
rplC	rplB	85581.CAY62_12955	85581.CAY62_12940	0.729	0	0.669	0	0.904	0.885	0.584	0.337	0.999
rplC	rplW	85581.CAY62_12955	85581.CAY62_12945	0.767	0	0.257	0	0.904	0.885	0.741	0.337	0.999
rplC	ARR50334.1	85581.CAY62_12955	85581.CAY62_12950	0.767	0	0.574	0	0.904	0.885	0.357	0.337	0.999
rplC	rpsJ	85581.CAY62_12955	85581.CAY62_12960	0.775	0	0.382	0	0.904	0.885	0.384	0.337	0.999
rplE	rplA	85581.CAY62_12895	85581.CAY62_00445	0.154	0	0.481	0	0.904	0.885	0.778	0.337	0.999
rplE	rpsK	85581.CAY62_12895	85581.CAY62_12840	0.397	0	0.747	0	0.904	0.885	0.332	0.337	0.999
rplE	rpsM	85581.CAY62_12895	85581.CAY62_12845	0.411	0	0.742	0	0.904	0.885	0.332	0.337	0.999
rplE	rplO	85581.CAY62_12895	85581.CAY62_12860	0.655	0	0.442	0	0.904	0.885	0.604	0.337	0.999
rplE	rpsE	85581.CAY62_12895	85581.CAY62_12870	0.655	0	0.752	0	0.904	0.885	0.344	0.337	0.999
rplE	rplR	85581.CAY62_12895	85581.CAY62_12875	0.666	0	0.585	0	0.904	0.885	0.613	0.337	0.999
rplE	rplF	85581.CAY62_12895	85581.CAY62_12880	0.666	0	0.703	0	0.904	0.885	0.324	0.337	0.999
rplE	rpsH	85581.CAY62_12895	85581.CAY62_12885	0.678	0	0.765	0	0.904	0.885	0.332	0.337	0.999
rplE	rpsN	85581.CAY62_12895	85581.CAY62_12890	0.771	0	0	0	0.904	0.885	0.79	0.337	0.999
rplE	rpsL	85581.CAY62_12895	85581.CAY62_12980	0.154	0	0.421	0	0.904	0.885	0.834	0.321	0.999
rplE	rplB	85581.CAY62_12895	85581.CAY62_12940	0.452	0	0.687	0	0.904	0.885	0.83	0.337	0.999
rplE	rpsC	85581.CAY62_12895	85581.CAY62_12925	0.5	0	0.685	0	0.904	0.885	0.367	0.337	0.999
rplE	rplV	85581.CAY62_12895	85581.CAY62_12930	0.479	0	0.554	0	0.904	0.885	0.662	0.337	0.999
rplE	rplN	85581.CAY62_12895	85581.CAY62_12905	0.758	0	0.756	0	0.904	0.885	0.613	0.337	0.999
rplE	rplX	85581.CAY62_12895	85581.CAY62_12900	0.771	0	0.228	0	0.904	0.885	0.391	0.337	0.999
rplF	rplO	85581.CAY62_12880	85581.CAY62_12860	0.785	0	0.327	0	0.904	0.885	0.668	0.337	0.999
rplF	rpmD	85581.CAY62_12880	85581.CAY62_12865	0.785	0	0	0	0.904	0.885	0.764	0.337	0.999
rplF	rpsE	85581.CAY62_12880	85581.CAY62_12870	0.785	0.694	0.407	0	0.904	0.885	0.373	0.337	0.999
rplF	rplR	85581.CAY62_12880	85581.CAY62_12875	0.799	0	0.624	0	0.904	0.885	0.767	0.337	0.999
rplF	rplP	85581.CAY62_12880	85581.CAY62_12920	0.441	0	0.743	0	0.904	0.885	0.606	0.337	0.999
rplF	rpsH	85581.CAY62_12880	85581.CAY62_12885	0.785	0.706	0.705	0	0.904	0.885	0.373	0.337	0.999
rplF	rplC	85581.CAY62_12880	85581.CAY62_12955	0.38	0	0.484	0	0.904	0.885	0.721	0.337	0.999
rplF	rplX	85581.CAY62_12880	85581.CAY62_12900	0.644	0	0.181	0	0.904	0.885	0.715	0.337	0.999
rplF	rplE	85581.CAY62_12880	85581.CAY62_12895	0.666	0	0.703	0	0.904	0.885	0.324	0.337	0.999
rplF	rplN	85581.CAY62_12880	85581.CAY62_12905	0.633	0	0.698	0	0.904	0.885	0.324	0.337	0.999
rplF	rplV	85581.CAY62_12880	85581.CAY62_12930	0.421	0	0.284	0	0.904	0.885	0.768	0.337	0.999
rplK	rplA	85581.CAY62_00440	85581.CAY62_00445	0.799	0.208	0.655	0	0.904	0.885	0	0.337	0.999
rplM	rpsI	85581.CAY62_12405	85581.CAY62_12400	0.771	0	0.649	0	0.904	0.885	0	0.337	0.999
rplN	rpsK	85581.CAY62_12905	85581.CAY62_12840	0.385	0.072	0.741	0	0.904	0.885	0.512	0.337	0.999
rplN	rpsE	85581.CAY62_12905	85581.CAY62_12870	0.624	0	0.705	0	0.904	0.885	0.504	0.337	0.999
rplN	rplR	85581.CAY62_12905	85581.CAY62_12875	0.633	0	0.286	0	0.904	0.885	0.613	0.337	0.999
rplN	rplF	85581.CAY62_12905	85581.CAY62_12880	0.633	0	0.698	0	0.904	0.885	0.324	0.337	0.999
rplN	rpsH	85581.CAY62_12905	85581.CAY62_12885	0.644	0	0.675	0	0.904	0.885	0.514	0.337	0.999
rplN	rpsN	85581.CAY62_12905	85581.CAY62_12890	0.731	0	0	0	0.904	0.885	0.578	0.337	0.999
rplN	rplE	85581.CAY62_12905	85581.CAY62_12895	0.758	0	0.756	0	0.904	0.885	0.613	0.337	0.999
rplN	rplV	85581.CAY62_12905	85581.CAY62_12930	0.498	0	0.435	0	0.904	0.885	0.662	0.337	0.999
rplN	rplB	85581.CAY62_12905	85581.CAY62_12940	0.469	0	0.686	0	0.904	0.885	0.584	0.337	0.999
rplN	rpsC	85581.CAY62_12905	85581.CAY62_12925	0.521	0	0.687	0	0.904	0.885	0.526	0.337	0.999
rplN	rpsL	85581.CAY62_12905	85581.CAY62_12980	0.154	0	0.598	0	0.904	0.885	0.744	0.337	0.999
rplN	rplP	85581.CAY62_12905	85581.CAY62_12920	0.526	0.443	0.738	0	0.904	0.885	0.28	0.337	0.999
rplN	rpsS	85581.CAY62_12905	85581.CAY62_12935	0.487	0	0.687	0	0.904	0.885	0.53	0.337	0.999
rplO	rplF	85581.CAY62_12860	85581.CAY62_12880	0.785	0	0.327	0	0.904	0.885	0.668	0.337	0.999
rplO	rpmD	85581.CAY62_12860	85581.CAY62_12865	0.799	0	0	0	0.904	0.885	0.731	0.337	0.999
rplO	rpsE	85581.CAY62_12860	85581.CAY62_12870	0.799	0	0.417	0	0.904	0.885	0.355	0.337	0.999
rplO	rplE	85581.CAY62_12860	85581.CAY62_12895	0.655	0	0.442	0	0.904	0.885	0.604	0.337	0.999
rplO	rplV	85581.CAY62_12860	85581.CAY62_12930	0.416	0	0.382	0	0.904	0.885	0.754	0.337	0.999
rplO	rplR	85581.CAY62_12860	85581.CAY62_12875	0.785	0	0.257	0	0.904	0.885	0.75	0.337	0.999
rplO	rplP	85581.CAY62_12860	85581.CAY62_12920	0.436	0	0.612	0	0.904	0.885	0.652	0.337	0.999
rplO	rpsH	85581.CAY62_12860	85581.CAY62_12885	0.77	0	0.576	0	0.904	0.885	0.354	0.337	0.999
rplO	rplC	85581.CAY62_12860	85581.CAY62_12955	0.376	0	0.497	0	0.904	0.885	0.729	0.337	0.999
rplP	rpsO	85581.CAY62_12920	85581.CAY62_02105	0	0	0.29	0	0.904	0.885	0.851	0.337	0.999
rplP	rpsB	85581.CAY62_12920	85581.CAY62_11100	0.071	0	0.617	0	0.904	0.885	0.851	0.337	0.999
rplP	rpsD	85581.CAY62_12920	85581.CAY62_12835	0.3	0	0.686	0	0.904	0.885	0.851	0.337	0.999
rplP	rpsK	85581.CAY62_12920	85581.CAY62_12840	0.312	0	0.518	0	0.904	0.885	0.851	0.337	0.999
rplP	rplO	85581.CAY62_12920	85581.CAY62_12860	0.436	0	0.612	0	0.904	0.885	0.652	0.337	0.999
rplP	rpsE	85581.CAY62_12920	85581.CAY62_12870	0.436	0	0.478	0	0.904	0.885	0.851	0.337	0.999
rplP	rplF	85581.CAY62_12920	85581.CAY62_12880	0.441	0	0.743	0	0.904	0.885	0.606	0.337	0.999
rplP	rpsH	85581.CAY62_12920	85581.CAY62_12885	0.446	0	0.734	0	0.904	0.885	0.851	0.337	0.999
rplP	rpsN	85581.CAY62_12920	85581.CAY62_12890	0.491	0	0.221	0	0.904	0.885	0.851	0.337	0.999
rplP	rplN	85581.CAY62_12920	85581.CAY62_12905	0.526	0.443	0.738	0	0.904	0.885	0.28	0.337	0.999
rplP	rpsQ	85581.CAY62_12920	85581.CAY62_12910	0.799	0	0.4	0	0.904	0.885	0.851	0.337	0.999
rplP	rplV	85581.CAY62_12920	85581.CAY62_12930	0.745	0	0.515	0	0.904	0.885	0.651	0.337	0.999
rplP	rpsC	85581.CAY62_12920	85581.CAY62_12925	0.79	0.722	0.709	0	0.904	0.885	0.851	0.337	0.999
rplP	rplB	85581.CAY62_12920	85581.CAY62_12940	0.689	0	0.695	0	0.904	0.885	0.424	0.337	0.999
rplP	rpsJ	85581.CAY62_12920	85581.CAY62_12960	0.616	0	0.283	0	0.904	0.885	0.851	0.337	0.999
rplP	rpsS	85581.CAY62_12920	85581.CAY62_12935	0.724	0	0.673	0	0.904	0.885	0.851	0.337	0.999
rplP	ARR50334.1	85581.CAY62_12920	85581.CAY62_12950	0.656	0	0.264	0	0.904	0.885	0.851	0.337	0.999
rplP	rpsG	85581.CAY62_12920	85581.CAY62_12975	0.154	0	0.722	0	0.904	0.885	0.851	0.337	0.999
rplP	rpsL	85581.CAY62_12920	85581.CAY62_12980	0.154	0	0.746	0	0.904	0.885	0.851	0.337	0.999
rplP	rplC	85581.CAY62_12920	85581.CAY62_12955	0.633	0	0.531	0	0.904	0.885	0.727	0.337	0.999
rplR	secY	85581.CAY62_12875	85581.CAY62_12855	0.73	0	0.604	0	0.904	0.878	0	0.337	0.999
rplR	rplO	85581.CAY62_12875	85581.CAY62_12860	0.785	0	0.257	0	0.904	0.885	0.75	0.337	0.999
rplR	rpmD	85581.CAY62_12875	85581.CAY62_12865	0.785	0	0	0	0.904	0.885	0.803	0.337	0.999
rplR	rpsE	85581.CAY62_12875	85581.CAY62_12870	0.785	0	0.267	0	0.904	0.885	0.349	0.337	0.999
rplR	rplF	85581.CAY62_12875	85581.CAY62_12880	0.799	0	0.624	0	0.904	0.885	0.767	0.337	0.999
rplR	rplW	85581.CAY62_12875	85581.CAY62_12945	0.389	0	0.199	0	0.904	0.885	0.794	0.337	0.999
rplR	rplX	85581.CAY62_12875	85581.CAY62_12900	0.644	0	0.445	0	0.904	0.885	0.709	0.337	0.999
rplR	rplN	85581.CAY62_12875	85581.CAY62_12905	0.633	0	0.286	0	0.904	0.885	0.613	0.337	0.999
rplR	rplE	85581.CAY62_12875	85581.CAY62_12895	0.666	0	0.585	0	0.904	0.885	0.613	0.337	0.999
rplR	rpsH	85581.CAY62_12875	85581.CAY62_12885	0.785	0	0.719	0	0.904	0.885	0.352	0.337	0.999
rplR	rplV	85581.CAY62_12875	85581.CAY62_12930	0.421	0	0.408	0	0.904	0.885	0.822	0.337	0.999
rplU	rpmA	85581.CAY62_01190	85581.CAY62_01195	0.751	0	0.62	0	0.904	0.885	0.304	0.337	0.999
rplV	rplO	85581.CAY62_12930	85581.CAY62_12860	0.416	0	0.382	0	0.904	0.885	0.754	0.337	0.999
rplV	rplR	85581.CAY62_12930	85581.CAY62_12875	0.421	0	0.408	0	0.904	0.885	0.822	0.337	0.999
rplV	rplF	85581.CAY62_12930	85581.CAY62_12880	0.421	0	0.284	0	0.904	0.885	0.768	0.337	0.999
rplV	rpsH	85581.CAY62_12930	85581.CAY62_12885	0.426	0	0.735	0	0.904	0.885	0.373	0.337	0.999
rplV	rplE	85581.CAY62_12930	85581.CAY62_12895	0.479	0	0.554	0	0.904	0.885	0.662	0.337	0.999
rplV	rplX	85581.CAY62_12930	85581.CAY62_12900	0.491	0	0.175	0	0.904	0.885	0.742	0.337	0.999
rplV	rplN	85581.CAY62_12930	85581.CAY62_12905	0.498	0	0.435	0	0.904	0.885	0.662	0.337	0.999
rplV	rpmC	85581.CAY62_12930	85581.CAY62_12915	0.745	0	0	0	0.904	0.885	0.762	0.337	0.999
rplV	rplP	85581.CAY62_12930	85581.CAY62_12920	0.745	0	0.515	0	0.904	0.885	0.651	0.337	0.999
rplV	rpsC	85581.CAY62_12930	85581.CAY62_12925	0.755	0	0.63	0	0.904	0.885	0.37	0.337	0.999
rplV	rplC	85581.CAY62_12930	85581.CAY62_12955	0.674	0	0.685	0	0.904	0.885	0.726	0.337	0.999
rplV	rpsS	85581.CAY62_12930	85581.CAY62_12935	0.775	0	0.601	0	0.904	0.885	0.365	0.337	0.999
rplV	rpsJ	85581.CAY62_12930	85581.CAY62_12960	0.655	0	0.458	0	0.904	0.885	0.406	0.337	0.999
rplV	rplW	85581.CAY62_12930	85581.CAY62_12945	0.7	0	0.165	0	0.904	0.885	0.802	0.337	0.999
rplV	ARR50334.1	85581.CAY62_12930	85581.CAY62_12950	0.7	0	0.523	0	0.904	0.885	0.708	0.337	0.999
rplV	rplB	85581.CAY62_12930	85581.CAY62_12940	0.737	0	0.558	0	0.904	0.885	0.616	0.337	0.999
rplW	rpmD	85581.CAY62_12945	85581.CAY62_12865	0.385	0	0	0	0.904	0.885	0.816	0.337	0.999
rplW	rplR	85581.CAY62_12945	85581.CAY62_12875	0.389	0	0.199	0	0.904	0.885	0.794	0.337	0.999
rplW	rpmC	85581.CAY62_12945	85581.CAY62_12915	0.656	0	0.19	0	0.904	0.885	0.725	0.337	0.999
rplW	rplV	85581.CAY62_12945	85581.CAY62_12930	0.7	0	0.165	0	0.904	0.885	0.802	0.337	0.999
rplW	rplC	85581.CAY62_12945	85581.CAY62_12955	0.767	0	0.257	0	0.904	0.885	0.741	0.337	0.999
rplW	ARR50334.1	85581.CAY62_12945	85581.CAY62_12950	0.799	0	0.185	0	0.904	0.885	0.729	0.337	0.999
rplX	rpmD	85581.CAY62_12900	85581.CAY62_12865	0.633	0	0.239	0	0.904	0.885	0.727	0.337	0.999
rplX	rplR	85581.CAY62_12900	85581.CAY62_12875	0.644	0	0.445	0	0.904	0.885	0.709	0.337	0.999
rplX	rplF	85581.CAY62_12900	85581.CAY62_12880	0.644	0	0.181	0	0.904	0.885	0.715	0.337	0.999
rplX	rplE	85581.CAY62_12900	85581.CAY62_12895	0.771	0	0.228	0	0.904	0.885	0.391	0.337	0.999
rplX	rplV	85581.CAY62_12900	85581.CAY62_12930	0.491	0	0.175	0	0.904	0.885	0.742	0.337	0.999
rpmA	rplU	85581.CAY62_01195	85581.CAY62_01190	0.751	0	0.62	0	0.904	0.885	0.304	0.337	0.999
rpmB	rpmG	85581.CAY62_13500	85581.CAY62_13495	0.775	0	0.742	0	0.904	0.885	0	0.337	0.999
rpmC	ARR50334.1	85581.CAY62_12915	85581.CAY62_12950	0.656	0	0	0	0.904	0.885	0.675	0.337	0.999
rpmC	rplW	85581.CAY62_12915	85581.CAY62_12945	0.656	0	0.19	0	0.904	0.885	0.725	0.337	0.999
rpmC	rplV	85581.CAY62_12915	85581.CAY62_12930	0.745	0	0	0	0.904	0.885	0.762	0.337	0.999
rpmD	rplO	85581.CAY62_12865	85581.CAY62_12860	0.799	0	0	0	0.904	0.885	0.731	0.337	0.999
rpmD	rplX	85581.CAY62_12865	85581.CAY62_12900	0.633	0	0.239	0	0.904	0.885	0.727	0.337	0.999
rpmD	rplR	85581.CAY62_12865	85581.CAY62_12875	0.785	0	0	0	0.904	0.885	0.803	0.337	0.999
rpmD	rplW	85581.CAY62_12865	85581.CAY62_12945	0.385	0	0	0	0.904	0.885	0.816	0.337	0.999
rpmD	rplF	85581.CAY62_12865	85581.CAY62_12880	0.785	0	0	0	0.904	0.885	0.764	0.337	0.999
rpmG	rpmB	85581.CAY62_13495	85581.CAY62_13500	0.775	0	0.742	0	0.904	0.885	0	0.337	0.999
rpoA	rpoB	85581.CAY62_12830	85581.CAY62_00460	0.154	0	0.637	0	0.904	0.885	0.851	0.337	0.999
rpoA	rpoC	85581.CAY62_12830	85581.CAY62_00465	0.154	0	0.438	0	0.904	0.885	0.851	0.337	0.999
rpoA	rpsD	85581.CAY62_12830	85581.CAY62_12835	0.739	0	0.62	0	0.904	0.877	0	0.337	0.999
rpoA	rpsK	85581.CAY62_12830	85581.CAY62_12840	0.656	0.834	0.442	0	0.904	0.873	0	0.337	0.999
rpoA	rpsM	85581.CAY62_12830	85581.CAY62_12845	0.623	0.648	0.411	0	0.904	0.875	0	0.337	0.999
rpoB	rpoC	85581.CAY62_00460	85581.CAY62_00465	0.581	0.899	0.77	0	0.904	0.885	0.851	0.337	0.999
rpoB	rpoA	85581.CAY62_00460	85581.CAY62_12830	0.154	0	0.637	0	0.904	0.885	0.851	0.337	0.999
rpoC	rpoB	85581.CAY62_00465	85581.CAY62_00460	0.581	0.899	0.77	0	0.904	0.885	0.851	0.337	0.999
rpoC	rpoA	85581.CAY62_00465	85581.CAY62_12830	0.154	0	0.438	0	0.904	0.885	0.851	0.337	0.999
rpsB	rplP	85581.CAY62_11100	85581.CAY62_12920	0.071	0	0.617	0	0.904	0.885	0.851	0.337	0.999
rpsB	rpsG	85581.CAY62_11100	85581.CAY62_12975	0.067	0	0.621	0	0.904	0.885	0.851	0.337	0.999
rpsB	rpsH	85581.CAY62_11100	85581.CAY62_12885	0.091	0	0.434	0	0.904	0.885	0.851	0.337	0.999
rpsB	rpsL	85581.CAY62_11100	85581.CAY62_12980	0.06	0	0.531	0	0.904	0.885	0.851	0.337	0.999
rpsB	rpsM	85581.CAY62_11100	85581.CAY62_12845	0.154	0	0.455	0	0.904	0.885	0.851	0.337	0.999
rpsB	rpsN	85581.CAY62_11100	85581.CAY62_12890	0.064	0	0.243	0	0.904	0.885	0.851	0.337	0.999
rpsB	rpsK	85581.CAY62_11100	85581.CAY62_12840	0.154	0	0.289	0	0.904	0.885	0.851	0.337	0.999
rpsB	rpsD	85581.CAY62_11100	85581.CAY62_12835	0.154	0	0.364	0	0.904	0.885	0.851	0.337	0.999
rpsB	rpsE	85581.CAY62_11100	85581.CAY62_12870	0.061	0	0.231	0	0.904	0.885	0.851	0.337	0.999
rpsB	rpsC	85581.CAY62_11100	85581.CAY62_12925	0.068	0	0.509	0	0.904	0.885	0.851	0.337	0.999
rpsB	rpsP	85581.CAY62_11100	85581.CAY62_11435	0.099	0	0.197	0	0.904	0.885	0.851	0.337	0.999
rpsB	rpsI	85581.CAY62_11100	85581.CAY62_12400	0.154	0	0.28	0	0.904	0.885	0.851	0.337	0.999
rpsB	ARR50334.1	85581.CAY62_11100	85581.CAY62_12950	0.154	0	0.159	0	0.904	0.885	0.851	0.337	0.999
rpsC	rpsB	85581.CAY62_12925	85581.CAY62_11100	0.068	0	0.509	0	0.904	0.885	0.851	0.337	0.999
rpsC	rpsD	85581.CAY62_12925	85581.CAY62_12835	0.299	0	0.602	0	0.904	0.885	0.851	0.337	0.999
rpsC	rpsK	85581.CAY62_12925	85581.CAY62_12840	0.311	0	0.687	0	0.904	0.885	0.851	0.337	0.999
rpsC	rpsM	85581.CAY62_12925	85581.CAY62_12845	0.318	0	0.512	0	0.904	0.885	0.851	0.337	0.999
rpsC	rpsE	85581.CAY62_12925	85581.CAY62_12870	0.432	0	0.592	0	0.904	0.885	0.851	0.337	0.999
rpsC	rpsH	85581.CAY62_12925	85581.CAY62_12885	0.443	0	0.675	0	0.904	0.885	0.851	0.337	0.999
rpsC	rpsN	85581.CAY62_12925	85581.CAY62_12890	0.487	0	0.254	0	0.904	0.885	0.851	0.337	0.999
rpsC	rplE	85581.CAY62_12925	85581.CAY62_12895	0.5	0	0.685	0	0.904	0.885	0.367	0.337	0.999
rpsC	rplN	85581.CAY62_12925	85581.CAY62_12905	0.521	0	0.687	0	0.904	0.885	0.526	0.337	0.999
rpsC	rpsQ	85581.CAY62_12925	85581.CAY62_12910	0.79	0	0.254	0	0.904	0.885	0.851	0.337	0.999
rpsC	rplP	85581.CAY62_12925	85581.CAY62_12920	0.79	0.722	0.709	0	0.904	0.885	0.851	0.337	0.999
rpsC	rpsG	85581.CAY62_12925	85581.CAY62_12975	0.154	0	0.6	0	0.904	0.885	0.851	0.337	0.999
rpsC	rpsL	85581.CAY62_12925	85581.CAY62_12980	0.154	0	0.393	0	0.904	0.885	0.851	0.337	0.999
rpsC	rpsS	85581.CAY62_12925	85581.CAY62_12935	0.733	0	0.694	0	0.904	0.885	0.851	0.337	0.999
rpsC	rpsJ	85581.CAY62_12925	85581.CAY62_12960	0.622	0	0.634	0	0.904	0.885	0.851	0.337	0.999
rpsC	ARR50334.1	85581.CAY62_12925	85581.CAY62_12950	0.663	0	0.287	0	0.904	0.885	0.851	0.337	0.999
rpsC	rplB	85581.CAY62_12925	85581.CAY62_12940	0.697	0	0.732	0	0.904	0.885	0.412	0.337	0.999
rpsC	rplV	85581.CAY62_12925	85581.CAY62_12930	0.755	0	0.63	0	0.904	0.885	0.37	0.337	0.999
rpsD	rpsB	85581.CAY62_12835	85581.CAY62_11100	0.154	0	0.364	0	0.904	0.885	0.851	0.337	0.999
rpsD	rpsI	85581.CAY62_12835	85581.CAY62_12400	0.154	0	0.228	0	0.904	0.885	0.851	0.337	0.999
rpsD	rpoA	85581.CAY62_12835	85581.CAY62_12830	0.739	0	0.62	0	0.904	0.877	0	0.337	0.999
rpsD	rpsK	85581.CAY62_12835	85581.CAY62_12840	0.707	0	0.511	0	0.904	0.885	0.851	0.337	0.999
rpsD	rpsN	85581.CAY62_12835	85581.CAY62_12890	0.378	0	0	0	0.904	0.885	0.851	0.337	0.999
rpsD	rpsG	85581.CAY62_12835	85581.CAY62_12975	0.154	0	0.533	0	0.904	0.885	0.851	0.337	0.999
rpsD	rplP	85581.CAY62_12835	85581.CAY62_12920	0.3	0	0.686	0	0.904	0.885	0.851	0.337	0.999
rpsD	rpsM	85581.CAY62_12835	85581.CAY62_12845	0.669	0	0.559	0	0.904	0.885	0.851	0.337	0.999
rpsD	rpsL	85581.CAY62_12835	85581.CAY62_12980	0.154	0	0.28	0	0.904	0.885	0.851	0.337	0.999
rpsD	rpsH	85581.CAY62_12835	85581.CAY62_12885	0.408	0	0.711	0	0.904	0.885	0.851	0.337	0.999
rpsD	rpsS	85581.CAY62_12835	85581.CAY62_12935	0.291	0	0.424	0	0.904	0.885	0.851	0.337	0.999
rpsD	rpsJ	85581.CAY62_12835	85581.CAY62_12960	0.279	0	0.322	0	0.904	0.885	0.851	0.337	0.999
rpsD	ARR50334.1	85581.CAY62_12835	85581.CAY62_12950	0.283	0	0.355	0	0.904	0.885	0.851	0.337	0.999
rpsD	rpsE	85581.CAY62_12835	85581.CAY62_12870	0.416	0	0.625	0	0.904	0.885	0.851	0.337	0.999
rpsD	rpsC	85581.CAY62_12835	85581.CAY62_12925	0.299	0	0.602	0	0.904	0.885	0.851	0.337	0.999
rpsD	rpsQ	85581.CAY62_12835	85581.CAY62_12910	0.3	0	0.313	0	0.904	0.885	0.851	0.337	0.999
rpsE	rpsB	85581.CAY62_12870	85581.CAY62_11100	0.061	0	0.231	0	0.904	0.885	0.851	0.337	0.999
rpsE	rpsI	85581.CAY62_12870	85581.CAY62_12400	0.154	0	0.531	0	0.903	0.885	0.851	0.337	0.999
rpsE	rpsD	85581.CAY62_12870	85581.CAY62_12835	0.416	0	0.625	0	0.904	0.885	0.851	0.337	0.999
rpsE	rpsK	85581.CAY62_12870	85581.CAY62_12840	0.453	0	0.736	0	0.904	0.885	0.851	0.337	0.999
rpsE	rpsM	85581.CAY62_12870	85581.CAY62_12845	0.471	0	0.656	0	0.904	0.885	0.851	0.337	0.999
rpsE	secY	85581.CAY62_12870	85581.CAY62_12855	0.743	0	0.442	0	0.904	0.864	0.362	0.337	0.999
rpsE	rplO	85581.CAY62_12870	85581.CAY62_12860	0.799	0	0.417	0	0.904	0.885	0.355	0.337	0.999
rpsE	ARR50334.1	85581.CAY62_12870	85581.CAY62_12950	0.385	0	0.178	0	0.904	0.885	0.851	0.337	0.999
rpsE	rpsS	85581.CAY62_12870	85581.CAY62_12935	0.408	0	0.535	0	0.904	0.885	0.851	0.337	0.999
rpsE	rpsJ	85581.CAY62_12870	85581.CAY62_12960	0.371	0	0.65	0	0.904	0.885	0.851	0.337	0.999
rpsE	rplF	85581.CAY62_12870	85581.CAY62_12880	0.785	0.694	0.407	0	0.904	0.885	0.373	0.337	0.999
rpsE	rpsC	85581.CAY62_12870	85581.CAY62_12925	0.432	0	0.592	0	0.904	0.885	0.851	0.337	0.999
rpsE	rpsQ	85581.CAY62_12870	85581.CAY62_12910	0.436	0	0.325	0	0.904	0.885	0.851	0.337	0.999
rpsE	rplE	85581.CAY62_12870	85581.CAY62_12895	0.655	0	0.752	0	0.904	0.885	0.344	0.337	0.999
rpsE	rplN	85581.CAY62_12870	85581.CAY62_12905	0.624	0	0.705	0	0.904	0.885	0.504	0.337	0.999
rpsE	rpsN	85581.CAY62_12870	85581.CAY62_12890	0.677	0	0	0	0.904	0.885	0.851	0.337	0.999
rpsE	rplR	85581.CAY62_12870	85581.CAY62_12875	0.785	0	0.267	0	0.904	0.885	0.349	0.337	0.999
rpsE	rpsH	85581.CAY62_12870	85581.CAY62_12885	0.77	0.698	0.703	0	0.904	0.885	0.851	0.337	0.999
rpsE	rpsL	85581.CAY62_12870	85581.CAY62_12980	0.154	0	0.279	0	0.904	0.885	0.851	0.337	0.999
rpsE	rplP	85581.CAY62_12870	85581.CAY62_12920	0.436	0	0.478	0	0.904	0.885	0.851	0.337	0.999
rpsE	rpsG	85581.CAY62_12870	85581.CAY62_12975	0.154	0	0.563	0	0.904	0.885	0.851	0.337	0.999
rpsF	rpsR	85581.CAY62_00935	85581.CAY62_00945	0.763	0	0.186	0	0.904	0.885	0.851	0.337	0.999
rpsG	rpsB	85581.CAY62_12975	85581.CAY62_11100	0.067	0	0.621	0	0.904	0.885	0.851	0.337	0.999
rpsG	rpsD	85581.CAY62_12975	85581.CAY62_12835	0.154	0	0.533	0	0.904	0.885	0.851	0.337	0.999
rpsG	rpsK	85581.CAY62_12975	85581.CAY62_12840	0.154	0	0.564	0	0.904	0.885	0.851	0.337	0.999
rpsG	rpsM	85581.CAY62_12975	85581.CAY62_12845	0.154	0	0.493	0	0.904	0.885	0.851	0.337	0.999
rpsG	rpsE	85581.CAY62_12975	85581.CAY62_12870	0.154	0	0.563	0	0.904	0.885	0.851	0.337	0.999
rpsG	rpsH	85581.CAY62_12975	85581.CAY62_12885	0.154	0	0.595	0	0.904	0.885	0.851	0.337	0.999
rpsG	rplP	85581.CAY62_12975	85581.CAY62_12920	0.154	0	0.722	0	0.904	0.885	0.851	0.337	0.999
rpsG	rpsC	85581.CAY62_12975	85581.CAY62_12925	0.154	0	0.6	0	0.904	0.885	0.851	0.337	0.999
rpsG	rpsS	85581.CAY62_12975	85581.CAY62_12935	0.154	0	0.423	0	0.904	0.885	0.851	0.337	0.999
rpsG	ARR50334.1	85581.CAY62_12975	85581.CAY62_12950	0.154	0	0.172	0	0.904	0.885	0.851	0.337	0.999
rpsG	rpsJ	85581.CAY62_12975	85581.CAY62_12960	0.154	0	0.494	0	0.904	0.885	0.851	0.337	0.999
rpsG	rpsL	85581.CAY62_12975	85581.CAY62_12980	0.582	0.138	0.768	0	0.904	0.885	0.851	0.337	0.999
rpsH	rpsR	85581.CAY62_12885	85581.CAY62_00945	0	0	0.432	0	0.903	0.885	0.851	0.211	0.999
rpsH	rpsO	85581.CAY62_12885	85581.CAY62_02105	0	0	0.259	0	0.903	0.885	0.851	0.337	0.999
rpsH	infA	85581.CAY62_12885	85581.CAY62_09120	0.154	0	0.679	0	0.904	0.885	0.678	0.337	0.999
rpsH	rpsB	85581.CAY62_12885	85581.CAY62_11100	0.091	0	0.434	0	0.904	0.885	0.851	0.337	0.999
rpsH	rpsI	85581.CAY62_12885	85581.CAY62_12400	0.154	0	0.27	0	0.902	0.885	0.851	0.337	0.999
rpsH	rpsD	85581.CAY62_12885	85581.CAY62_12835	0.408	0	0.711	0	0.904	0.885	0.851	0.337	0.999
rpsH	rpsK	85581.CAY62_12885	85581.CAY62_12840	0.441	0	0.649	0	0.904	0.885	0.851	0.337	0.999
rpsH	rpsM	85581.CAY62_12885	85581.CAY62_12845	0.46	0	0.673	0	0.904	0.885	0.851	0.337	0.999
rpsH	secY	85581.CAY62_12885	85581.CAY62_12855	0.717	0	0.581	0	0.904	0.864	0.834	0.337	0.999
rpsH	rplO	85581.CAY62_12885	85581.CAY62_12860	0.77	0	0.576	0	0.904	0.885	0.354	0.337	0.999
rpsH	rpsE	85581.CAY62_12885	85581.CAY62_12870	0.77	0.698	0.703	0	0.904	0.885	0.851	0.337	0.999
rpsH	rplR	85581.CAY62_12885	85581.CAY62_12875	0.785	0	0.719	0	0.904	0.885	0.352	0.337	0.999
rpsH	rplF	85581.CAY62_12885	85581.CAY62_12880	0.785	0.706	0.705	0	0.904	0.885	0.373	0.337	0.999
rpsH	rpsS	85581.CAY62_12885	85581.CAY62_12935	0.418	0	0.684	0	0.904	0.885	0.851	0.337	0.999
rpsH	rpsJ	85581.CAY62_12885	85581.CAY62_12960	0.378	0	0.433	0	0.904	0.885	0.851	0.337	0.999
rpsH	ARR50334.1	85581.CAY62_12885	85581.CAY62_12950	0.393	0	0.314	0	0.904	0.885	0.851	0.337	0.999
rpsH	rpsN	85581.CAY62_12885	85581.CAY62_12890	0.7	0	0.16	0	0.904	0.885	0.851	0.337	0.999
rpsH	rplE	85581.CAY62_12885	85581.CAY62_12895	0.678	0	0.765	0	0.904	0.885	0.332	0.337	0.999
rpsH	rpsG	85581.CAY62_12885	85581.CAY62_12975	0.154	0	0.595	0	0.904	0.885	0.851	0.337	0.999
rpsH	rplN	85581.CAY62_12885	85581.CAY62_12905	0.644	0	0.675	0	0.904	0.885	0.514	0.337	0.999
rpsH	rplP	85581.CAY62_12885	85581.CAY62_12920	0.446	0	0.734	0	0.904	0.885	0.851	0.337	0.999
rpsH	rplV	85581.CAY62_12885	85581.CAY62_12930	0.426	0	0.735	0	0.904	0.885	0.373	0.337	0.999
rpsH	rpsC	85581.CAY62_12885	85581.CAY62_12925	0.443	0	0.675	0	0.904	0.885	0.851	0.337	0.999
rpsH	rpsQ	85581.CAY62_12885	85581.CAY62_12910	0.446	0	0.652	0	0.904	0.885	0.851	0.337	0.999
rpsH	rpsL	85581.CAY62_12885	85581.CAY62_12980	0.154	0	0.394	0	0.904	0.885	0.851	0.337	0.999
rpsI	rpsR	85581.CAY62_12400	85581.CAY62_00945	0	0	0.275	0	0.904	0.885	0.851	0.307	0.999
rpsI	rpsO	85581.CAY62_12400	85581.CAY62_02105	0.101	0	0.189	0	0.904	0.885	0.851	0.337	0.999
rpsI	rpsB	85581.CAY62_12400	85581.CAY62_11100	0.154	0	0.28	0	0.904	0.885	0.851	0.337	0.999
rpsI	rpsP	85581.CAY62_12400	85581.CAY62_11435	0.102	0	0.199	0	0.904	0.885	0.851	0.337	0.999
rpsI	rpsH	85581.CAY62_12400	85581.CAY62_12885	0.154	0	0.27	0	0.902	0.885	0.851	0.337	0.999
rpsI	rpsM	85581.CAY62_12400	85581.CAY62_12845	0.154	0	0.442	0	0.882	0.885	0.851	0.337	0.999
rpsI	rpsK	85581.CAY62_12400	85581.CAY62_12840	0.154	0	0.505	0	0.867	0.885	0.851	0.337	0.999
rpsI	rplM	85581.CAY62_12400	85581.CAY62_12405	0.771	0	0.649	0	0.904	0.885	0	0.337	0.999
rpsI	rpsQ	85581.CAY62_12400	85581.CAY62_12910	0.154	0	0.251	0	0.888	0.885	0.851	0.337	0.999
rpsI	rpsD	85581.CAY62_12400	85581.CAY62_12835	0.154	0	0.228	0	0.904	0.885	0.851	0.337	0.999
rpsI	rpsE	85581.CAY62_12400	85581.CAY62_12870	0.154	0	0.531	0	0.903	0.885	0.851	0.337	0.999
rpsI	rpsS	85581.CAY62_12400	85581.CAY62_12935	0.154	0	0.215	0	0.902	0.885	0.851	0.337	0.999
rpsI	rpsJ	85581.CAY62_12400	85581.CAY62_12960	0.103	0	0.231	0	0.904	0.885	0.851	0.337	0.999
rpsJ	rpsI	85581.CAY62_12960	85581.CAY62_12400	0.103	0	0.231	0	0.904	0.885	0.851	0.337	0.999
rpsJ	rpsD	85581.CAY62_12960	85581.CAY62_12835	0.279	0	0.322	0	0.904	0.885	0.851	0.337	0.999
rpsJ	rpsK	85581.CAY62_12960	85581.CAY62_12840	0.288	0	0.594	0	0.904	0.885	0.851	0.337	0.999
rpsJ	rpsM	85581.CAY62_12960	85581.CAY62_12845	0.292	0	0.348	0	0.904	0.885	0.851	0.337	0.999
rpsJ	rpsE	85581.CAY62_12960	85581.CAY62_12870	0.371	0	0.65	0	0.904	0.885	0.851	0.337	0.999
rpsJ	rpsH	85581.CAY62_12960	85581.CAY62_12885	0.378	0	0.433	0	0.904	0.885	0.851	0.337	0.999
rpsJ	rpsN	85581.CAY62_12960	85581.CAY62_12890	0.408	0	0	0	0.904	0.885	0.851	0.337	0.999
rpsJ	rpsQ	85581.CAY62_12960	85581.CAY62_12910	0.616	0	0	0	0.904	0.885	0.851	0.337	0.999
rpsJ	rplP	85581.CAY62_12960	85581.CAY62_12920	0.616	0	0.283	0	0.904	0.885	0.851	0.337	0.999
rpsJ	rpsC	85581.CAY62_12960	85581.CAY62_12925	0.622	0	0.634	0	0.904	0.885	0.851	0.337	0.999
rpsJ	rplV	85581.CAY62_12960	85581.CAY62_12930	0.655	0	0.458	0	0.904	0.885	0.406	0.337	0.999
rpsJ	rpsS	85581.CAY62_12960	85581.CAY62_12935	0.674	0	0.601	0	0.904	0.885	0.851	0.337	0.999
rpsJ	rplB	85581.CAY62_12960	85581.CAY62_12940	0.708	0	0.526	0	0.904	0.885	0.438	0.337	0.999
rpsJ	ARR50334.1	85581.CAY62_12960	85581.CAY62_12950	0.745	0	0.397	0	0.904	0.885	0.851	0.337	0.999
rpsJ	rplC	85581.CAY62_12960	85581.CAY62_12955	0.775	0	0.382	0	0.904	0.885	0.384	0.337	0.999
rpsJ	rpsG	85581.CAY62_12960	85581.CAY62_12975	0.154	0	0.494	0	0.904	0.885	0.851	0.337	0.999
rpsJ	rpsL	85581.CAY62_12960	85581.CAY62_12980	0.154	0	0.239	0	0.904	0.885	0.851	0.337	0.999
rpsK	rpsB	85581.CAY62_12840	85581.CAY62_11100	0.154	0	0.289	0	0.904	0.885	0.851	0.337	0.999
rpsK	rpsI	85581.CAY62_12840	85581.CAY62_12400	0.154	0	0.505	0	0.867	0.885	0.851	0.337	0.999
rpsK	rpoA	85581.CAY62_12840	85581.CAY62_12830	0.656	0.834	0.442	0	0.904	0.873	0	0.337	0.999
rpsK	rpsD	85581.CAY62_12840	85581.CAY62_12835	0.707	0	0.511	0	0.904	0.885	0.851	0.337	0.999
rpsK	rpsN	85581.CAY62_12840	85581.CAY62_12890	0.405	0	0	0	0.904	0.885	0.851	0.337	0.999
rpsK	rpsH	85581.CAY62_12840	85581.CAY62_12885	0.441	0	0.649	0	0.904	0.885	0.851	0.337	0.999
rpsK	rpsM	85581.CAY62_12840	85581.CAY62_12845	0.755	0.734	0.606	0	0.904	0.885	0.851	0.337	0.999
rpsK	rpsL	85581.CAY62_12840	85581.CAY62_12980	0.154	0	0.338	0	0.904	0.885	0.851	0.337	0.999
rpsK	rplP	85581.CAY62_12840	85581.CAY62_12920	0.312	0	0.518	0	0.904	0.885	0.851	0.337	0.999
rpsK	rpsG	85581.CAY62_12840	85581.CAY62_12975	0.154	0	0.564	0	0.904	0.885	0.851	0.337	0.999
rpsK	ARR50334.1	85581.CAY62_12840	85581.CAY62_12950	0.293	0	0.241	0	0.904	0.885	0.851	0.337	0.999
rpsK	rpsS	85581.CAY62_12840	85581.CAY62_12935	0.303	0	0.631	0	0.904	0.885	0.851	0.337	0.999
rpsK	rpsJ	85581.CAY62_12840	85581.CAY62_12960	0.288	0	0.594	0	0.904	0.885	0.851	0.337	0.999
rpsK	rpsC	85581.CAY62_12840	85581.CAY62_12925	0.311	0	0.687	0	0.904	0.885	0.851	0.337	0.999
rpsK	rpsQ	85581.CAY62_12840	85581.CAY62_12910	0.312	0	0.291	0	0.904	0.885	0.851	0.337	0.999
rpsK	rplE	85581.CAY62_12840	85581.CAY62_12895	0.397	0	0.747	0	0.904	0.885	0.332	0.337	0.999
rpsK	rpsE	85581.CAY62_12840	85581.CAY62_12870	0.453	0	0.736	0	0.904	0.885	0.851	0.337	0.999
rpsK	rplN	85581.CAY62_12840	85581.CAY62_12905	0.385	0.072	0.741	0	0.904	0.885	0.512	0.337	0.999
rpsL	rplA	85581.CAY62_12980	85581.CAY62_00445	0.154	0	0.225	0	0.904	0.885	0.838	0.337	0.999
rpsL	rpsB	85581.CAY62_12980	85581.CAY62_11100	0.06	0	0.531	0	0.904	0.885	0.851	0.337	0.999
rpsL	rpsD	85581.CAY62_12980	85581.CAY62_12835	0.154	0	0.28	0	0.904	0.885	0.851	0.337	0.999
rpsL	rpsK	85581.CAY62_12980	85581.CAY62_12840	0.154	0	0.338	0	0.904	0.885	0.851	0.337	0.999
rpsL	rpsM	85581.CAY62_12980	85581.CAY62_12845	0.154	0	0.485	0	0.904	0.885	0.851	0.337	0.999
rpsL	rpsE	85581.CAY62_12980	85581.CAY62_12870	0.154	0	0.279	0	0.904	0.885	0.851	0.337	0.999
rpsL	rpsH	85581.CAY62_12980	85581.CAY62_12885	0.154	0	0.394	0	0.904	0.885	0.851	0.337	0.999
rpsL	rpsN	85581.CAY62_12980	85581.CAY62_12890	0.154	0	0.214	0	0.904	0.885	0.851	0.337	0.999
rpsL	rplE	85581.CAY62_12980	85581.CAY62_12895	0.154	0	0.421	0	0.904	0.885	0.834	0.321	0.999
rpsL	rplN	85581.CAY62_12980	85581.CAY62_12905	0.154	0	0.598	0	0.904	0.885	0.744	0.337	0.999
rpsL	rplP	85581.CAY62_12980	85581.CAY62_12920	0.154	0	0.746	0	0.904	0.885	0.851	0.337	0.999
rpsL	rpsC	85581.CAY62_12980	85581.CAY62_12925	0.154	0	0.393	0	0.904	0.885	0.851	0.337	0.999
rpsL	rpsS	85581.CAY62_12980	85581.CAY62_12935	0.154	0	0.46	0	0.904	0.885	0.851	0.337	0.999
rpsL	rplB	85581.CAY62_12980	85581.CAY62_12940	0.154	0	0.604	0	0.904	0.885	0.851	0.337	0.999
rpsL	ARR50334.1	85581.CAY62_12980	85581.CAY62_12950	0.154	0	0.278	0	0.904	0.885	0.851	0.336	0.999
rpsL	rpsJ	85581.CAY62_12980	85581.CAY62_12960	0.154	0	0.239	0	0.904	0.885	0.851	0.337	0.999
rpsL	rpsG	85581.CAY62_12980	85581.CAY62_12975	0.582	0.138	0.768	0	0.904	0.885	0.851	0.337	0.999
rpsM	rpsB	85581.CAY62_12845	85581.CAY62_11100	0.154	0	0.455	0	0.904	0.885	0.851	0.337	0.999
rpsM	rpsI	85581.CAY62_12845	85581.CAY62_12400	0.154	0	0.442	0	0.882	0.885	0.851	0.337	0.999
rpsM	rpoA	85581.CAY62_12845	85581.CAY62_12830	0.623	0.648	0.411	0	0.904	0.875	0	0.337	0.999
rpsM	rpsD	85581.CAY62_12845	85581.CAY62_12835	0.669	0	0.559	0	0.904	0.885	0.851	0.337	0.999
rpsM	rpsK	85581.CAY62_12845	85581.CAY62_12840	0.755	0.734	0.606	0	0.904	0.885	0.851	0.337	0.999
rpsM	rpsH	85581.CAY62_12845	85581.CAY62_12885	0.46	0	0.673	0	0.904	0.885	0.851	0.337	0.999
rpsM	rpsL	85581.CAY62_12845	85581.CAY62_12980	0.154	0	0.485	0	0.904	0.885	0.851	0.337	0.999
rpsM	rpsG	85581.CAY62_12845	85581.CAY62_12975	0.154	0	0.493	0	0.904	0.885	0.851	0.337	0.999
rpsM	rpsN	85581.CAY62_12845	85581.CAY62_12890	0.42	0	0	0	0.904	0.885	0.851	0.337	0.999
rpsM	rpsC	85581.CAY62_12845	85581.CAY62_12925	0.318	0	0.512	0	0.904	0.885	0.851	0.337	0.999
rpsM	rpsQ	85581.CAY62_12845	85581.CAY62_12910	0.319	0	0.184	0	0.904	0.885	0.851	0.337	0.999
rpsM	rplE	85581.CAY62_12845	85581.CAY62_12895	0.411	0	0.742	0	0.904	0.885	0.332	0.337	0.999
rpsM	rpsE	85581.CAY62_12845	85581.CAY62_12870	0.471	0	0.656	0	0.904	0.885	0.851	0.337	0.999
rpsM	ARR50334.1	85581.CAY62_12845	85581.CAY62_12950	0.298	0	0.154	0	0.904	0.885	0.851	0.337	0.999
rpsM	rpsS	85581.CAY62_12845	85581.CAY62_12935	0.308	0	0.611	0	0.904	0.885	0.851	0.337	0.999
rpsM	rpsJ	85581.CAY62_12845	85581.CAY62_12960	0.292	0	0.348	0	0.904	0.885	0.851	0.337	0.999
rpsN	rpsB	85581.CAY62_12890	85581.CAY62_11100	0.064	0	0.243	0	0.904	0.885	0.851	0.337	0.999
rpsN	rpsD	85581.CAY62_12890	85581.CAY62_12835	0.378	0	0	0	0.904	0.885	0.851	0.337	0.999
rpsN	rpsK	85581.CAY62_12890	85581.CAY62_12840	0.405	0	0	0	0.904	0.885	0.851	0.337	0.999
rpsN	rpsM	85581.CAY62_12890	85581.CAY62_12845	0.42	0	0	0	0.904	0.885	0.851	0.337	0.999
rpsN	rpsE	85581.CAY62_12890	85581.CAY62_12870	0.677	0	0	0	0.904	0.885	0.851	0.337	0.999
rpsN	rpsH	85581.CAY62_12890	85581.CAY62_12885	0.7	0	0.16	0	0.904	0.885	0.851	0.337	0.999
rpsN	rplN	85581.CAY62_12890	85581.CAY62_12905	0.731	0	0	0	0.904	0.885	0.578	0.337	0.999
rpsN	rplP	85581.CAY62_12890	85581.CAY62_12920	0.491	0	0.221	0	0.904	0.885	0.851	0.337	0.999
rpsN	rplE	85581.CAY62_12890	85581.CAY62_12895	0.771	0	0	0	0.904	0.885	0.79	0.337	0.999
rpsN	rpsQ	85581.CAY62_12890	85581.CAY62_12910	0.491	0	0	0	0.904	0.885	0.851	0.337	0.999
rpsN	rpsL	85581.CAY62_12890	85581.CAY62_12980	0.154	0	0.214	0	0.904	0.885	0.851	0.337	0.999
rpsN	rpsC	85581.CAY62_12890	85581.CAY62_12925	0.487	0	0.254	0	0.904	0.885	0.851	0.337	0.999
rpsN	rpsJ	85581.CAY62_12890	85581.CAY62_12960	0.408	0	0	0	0.904	0.885	0.851	0.337	0.999
rpsN	rpsS	85581.CAY62_12890	85581.CAY62_12935	0.457	0	0	0	0.904	0.885	0.851	0.337	0.999
rpsN	ARR50334.1	85581.CAY62_12890	85581.CAY62_12950	0.426	0	0	0	0.904	0.885	0.851	0.337	0.999
rpsO	rpsQ	85581.CAY62_02105	85581.CAY62_12910	0	0	0.441	0	0.904	0.885	0.851	0.337	0.999
rpsO	rpsI	85581.CAY62_02105	85581.CAY62_12400	0.101	0	0.189	0	0.904	0.885	0.851	0.337	0.999
rpsO	rplP	85581.CAY62_02105	85581.CAY62_12920	0	0	0.29	0	0.904	0.885	0.851	0.337	0.999
rpsO	rpsH	85581.CAY62_02105	85581.CAY62_12885	0	0	0.259	0	0.903	0.885	0.851	0.337	0.999
rpsP	rpsB	85581.CAY62_11435	85581.CAY62_11100	0.099	0	0.197	0	0.904	0.885	0.851	0.337	0.999
rpsP	rpsI	85581.CAY62_11435	85581.CAY62_12400	0.102	0	0.199	0	0.904	0.885	0.851	0.337	0.999
rpsQ	rpsR	85581.CAY62_12910	85581.CAY62_00945	0	0	0.414	0	0.889	0.885	0.851	0.337	0.999
rpsQ	rpsO	85581.CAY62_12910	85581.CAY62_02105	0	0	0.441	0	0.904	0.885	0.851	0.337	0.999
rpsQ	rpsI	85581.CAY62_12910	85581.CAY62_12400	0.154	0	0.251	0	0.888	0.885	0.851	0.337	0.999
rpsQ	rpsD	85581.CAY62_12910	85581.CAY62_12835	0.3	0	0.313	0	0.904	0.885	0.851	0.337	0.999
rpsQ	rpsK	85581.CAY62_12910	85581.CAY62_12840	0.312	0	0.291	0	0.904	0.885	0.851	0.337	0.999
rpsQ	rpsM	85581.CAY62_12910	85581.CAY62_12845	0.319	0	0.184	0	0.904	0.885	0.851	0.337	0.999
rpsQ	rpsE	85581.CAY62_12910	85581.CAY62_12870	0.436	0	0.325	0	0.904	0.885	0.851	0.337	0.999
rpsQ	rpsH	85581.CAY62_12910	85581.CAY62_12885	0.446	0	0.652	0	0.904	0.885	0.851	0.337	0.999
rpsQ	rpsN	85581.CAY62_12910	85581.CAY62_12890	0.491	0	0	0	0.904	0.885	0.851	0.337	0.999
rpsQ	rplP	85581.CAY62_12910	85581.CAY62_12920	0.799	0	0.4	0	0.904	0.885	0.851	0.337	0.999
rpsQ	rpsC	85581.CAY62_12910	85581.CAY62_12925	0.79	0	0.254	0	0.904	0.885	0.851	0.337	0.999
rpsQ	rpsJ	85581.CAY62_12910	85581.CAY62_12960	0.616	0	0	0	0.904	0.885	0.851	0.337	0.999
rpsQ	rpsS	85581.CAY62_12910	85581.CAY62_12935	0.724	0	0.203	0	0.904	0.885	0.851	0.337	0.999
rpsQ	ARR50334.1	85581.CAY62_12910	85581.CAY62_12950	0.656	0	0.2	0	0.904	0.885	0.851	0.337	0.999
rpsR	rpsF	85581.CAY62_00945	85581.CAY62_00935	0.763	0	0.186	0	0.904	0.885	0.851	0.337	0.999
rpsR	rpsH	85581.CAY62_00945	85581.CAY62_12885	0	0	0.432	0	0.903	0.885	0.851	0.211	0.999
rpsR	rpsI	85581.CAY62_00945	85581.CAY62_12400	0	0	0.275	0	0.904	0.885	0.851	0.307	0.999
rpsR	rpsQ	85581.CAY62_00945	85581.CAY62_12910	0	0	0.414	0	0.889	0.885	0.851	0.337	0.999
rpsS	rpsI	85581.CAY62_12935	85581.CAY62_12400	0.154	0	0.215	0	0.902	0.885	0.851	0.337	0.999
rpsS	rpsD	85581.CAY62_12935	85581.CAY62_12835	0.291	0	0.424	0	0.904	0.885	0.851	0.337	0.999
rpsS	rpsK	85581.CAY62_12935	85581.CAY62_12840	0.303	0	0.631	0	0.904	0.885	0.851	0.337	0.999
rpsS	rpsM	85581.CAY62_12935	85581.CAY62_12845	0.308	0	0.611	0	0.904	0.885	0.851	0.337	0.999
rpsS	rpsE	85581.CAY62_12935	85581.CAY62_12870	0.408	0	0.535	0	0.904	0.885	0.851	0.337	0.999
rpsS	rpsH	85581.CAY62_12935	85581.CAY62_12885	0.418	0	0.684	0	0.904	0.885	0.851	0.337	0.999
rpsS	rpsN	85581.CAY62_12935	85581.CAY62_12890	0.457	0	0	0	0.904	0.885	0.851	0.337	0.999
rpsS	rplN	85581.CAY62_12935	85581.CAY62_12905	0.487	0	0.687	0	0.904	0.885	0.53	0.337	0.999
rpsS	rpsQ	85581.CAY62_12935	85581.CAY62_12910	0.724	0	0.203	0	0.904	0.885	0.851	0.337	0.999
rpsS	rplP	85581.CAY62_12935	85581.CAY62_12920	0.724	0	0.673	0	0.904	0.885	0.851	0.337	0.999
rpsS	rpsC	85581.CAY62_12935	85581.CAY62_12925	0.733	0	0.694	0	0.904	0.885	0.851	0.337	0.999
rpsS	rplV	85581.CAY62_12935	85581.CAY62_12930	0.775	0	0.601	0	0.904	0.885	0.365	0.337	0.999
rpsS	rpsJ	85581.CAY62_12935	85581.CAY62_12960	0.674	0	0.601	0	0.904	0.885	0.851	0.337	0.999
rpsS	ARR50334.1	85581.CAY62_12935	85581.CAY62_12950	0.721	0	0.346	0	0.904	0.885	0.851	0.337	0.999
rpsS	rpsG	85581.CAY62_12935	85581.CAY62_12975	0.154	0	0.423	0	0.904	0.885	0.851	0.337	0.999
rpsS	rpsL	85581.CAY62_12935	85581.CAY62_12980	0.154	0	0.46	0	0.904	0.885	0.851	0.337	0.999
rpsS	rplC	85581.CAY62_12935	85581.CAY62_12955	0.693	0	0.55	0	0.904	0.885	0.343	0.337	0.999
rpsS	rplB	85581.CAY62_12935	85581.CAY62_12940	0.759	0	0.767	0	0.904	0.885	0.41	0.337	0.999
sdhA	ARR48245.1	85581.CAY62_04140	85581.CAY62_00700	0.075	0	0.767	0	0.664	0.847	0.958	0.124	0.999
sdhA	ARR48841.1	85581.CAY62_04140	85581.CAY62_04130	0.799	0	0.473	0	0.786	0.853	0.966	0.183	0.999
sdhA	sdhB	85581.CAY62_04140	85581.CAY62_04145	0.767	0	0.774	0	0.664	0.847	0.958	0.124	0.999
sdhB	ARR48841.1	85581.CAY62_04145	85581.CAY62_04130	0.767	0	0.481	0	0.786	0.853	0.965	0.201	0.999
sdhB	ARR48842.1	85581.CAY62_04145	85581.CAY62_04135	0.767	0	0.278	0	0.752	0.851	0.9	0.195	0.999
sdhB	sdhA	85581.CAY62_04145	85581.CAY62_04140	0.767	0	0.774	0	0.664	0.847	0.958	0.124	0.999
secA	secY	85581.CAY62_12260	85581.CAY62_12855	0.103	0	0.471	0	0	0.885	0.984	0.337	0.999
secY	secA	85581.CAY62_12855	85581.CAY62_12260	0.103	0	0.471	0	0	0.885	0.984	0.337	0.999
secY	rpsE	85581.CAY62_12855	85581.CAY62_12870	0.743	0	0.442	0	0.904	0.864	0.362	0.337	0.999
secY	rplR	85581.CAY62_12855	85581.CAY62_12875	0.73	0	0.604	0	0.904	0.878	0	0.337	0.999
secY	rpsH	85581.CAY62_12855	85581.CAY62_12885	0.717	0	0.581	0	0.904	0.864	0.834	0.337	0.999
sucC	sucD	85581.CAY62_04160	85581.CAY62_04165	0.799	0.9	0.774	0	0.904	0.885	0.984	0.337	0.999
sucD	sucC	85581.CAY62_04165	85581.CAY62_04160	0.799	0.9	0.774	0	0.904	0.885	0.984	0.337	0.999
ARR48259.1	ARR48260.1	85581.CAY62_00890	85581.CAY62_00895	0.799	0	0.774	0	0.768	0.865	0	0.337	0.998
ARR48260.1	ARR48259.1	85581.CAY62_00895	85581.CAY62_00890	0.799	0	0.774	0	0.768	0.865	0	0.337	0.998
ARR48294.1	cysH	85581.CAY62_01070	85581.CAY62_01030	0.154	0.509	0.356	0	0.888	0.852	0.711	0.337	0.998
ARR48473.1	secY	85581.CAY62_02065	85581.CAY62_12855	0	0	0.277	0	0.098	0.885	0.967	0.337	0.998
ARR48632.1	ARR48633.1	85581.CAY62_03020	85581.CAY62_03025	0.767	0.276	0.772	0	0.964	0	0	0.372	0.998
ARR48633.1	ARR48632.1	85581.CAY62_03025	85581.CAY62_03020	0.767	0.276	0.772	0	0.964	0	0	0.372	0.998
ARR48713.1	flgI	85581.CAY62_03450	85581.CAY62_03465	0.62	0	0.77	0	0.903	0.709	0	0.337	0.998
ARR48713.1	flgH	85581.CAY62_03450	85581.CAY62_03460	0.741	0	0.77	0	0.904	0.719	0	0.337	0.998
ARR48713.1	flgG	85581.CAY62_03450	85581.CAY62_03455	0.759	0	0.305	0.639	0.904	0.851	0	0.337	0.998
ARR48842.1	sdhA	85581.CAY62_04135	85581.CAY62_04140	0.799	0	0.302	0	0.762	0.688	0.9	0.183	0.998
ARR48868.1	minE	85581.CAY62_04270	85581.CAY62_04265	0.799	0	0.772	0	0.771	0.883	0	0.19	0.998
ARR49020.1	ribB	85581.CAY62_05145	85581.CAY62_03030	0.233	0.624	0.772	0	0.973	0.091	0	0.372	0.998
ARR49517.1	gcvP	85581.CAY62_07980	85581.CAY62_16830	0	0	0	0	0.998	0	0	0	0.998
ARR49723.1	purL	85581.CAY62_09160	85581.CAY62_02995	0.245	0	0	0	0.997	0	0	0.389	0.998
ARR49952.1	metG	85581.CAY62_10660	85581.CAY62_09045	0.235	0	0	0.605	0.916	0.851	0.851	0.381	0.998
ARR50197.1	aceF	85581.CAY62_12195	85581.CAY62_12200	0.488	0.309	0.769	0	0.452	0.64	0.942	0.093	0.998
ARR50334.1	rplJ	85581.CAY62_12950	85581.CAY62_00450	0.154	0	0	0	0.904	0.885	0.729	0.337	0.998
ARR50334.1	rpsO	85581.CAY62_12950	85581.CAY62_02105	0.046	0	0.169	0	0.899	0.885	0.851	0.264	0.998
ARR50334.1	rpsA	85581.CAY62_12950	85581.CAY62_08215	0.06	0	0.153	0	0.903	0.885	0.851	0.27	0.998
ARR50334.1	infA	85581.CAY62_12950	85581.CAY62_09120	0.154	0	0.172	0	0.904	0.885	0.824	0.208	0.998
ARR50334.1	rplR	85581.CAY62_12950	85581.CAY62_12875	0.389	0	0.279	0	0.904	0.885	0.675	0.337	0.998
ARR50334.1	rplX	85581.CAY62_12950	85581.CAY62_12900	0.446	0	0.159	0	0.904	0.885	0.59	0.337	0.998
aceF	ARR50197.1	85581.CAY62_12200	85581.CAY62_12195	0.488	0.309	0.769	0	0.452	0.64	0.942	0.093	0.998
atpA	atpC	85581.CAY62_14305	85581.CAY62_14320	0.538	0	0.559	0	0.744	0.853	0.851	0.183	0.998
atpC	atpA	85581.CAY62_14320	85581.CAY62_14305	0.538	0	0.559	0	0.744	0.853	0.851	0.183	0.998
atpC	atpD	85581.CAY62_14320	85581.CAY62_14315	0.738	0	0.574	0	0.775	0.853	0.603	0.183	0.998
atpD	atpG	85581.CAY62_14315	85581.CAY62_14310	0.675	0.001	0.774	0	0.664	0.847	0.603	0.124	0.998
atpD	atpC	85581.CAY62_14315	85581.CAY62_14320	0.738	0	0.574	0	0.775	0.853	0.603	0.183	0.998
atpG	atpD	85581.CAY62_14310	85581.CAY62_14315	0.675	0.001	0.774	0	0.664	0.847	0.603	0.124	0.998
cysH	ARR48294.1	85581.CAY62_01030	85581.CAY62_01070	0.154	0.509	0.356	0	0.888	0.852	0.711	0.337	0.998
flgG	ARR48713.1	85581.CAY62_03455	85581.CAY62_03450	0.759	0	0.305	0.639	0.904	0.851	0	0.337	0.998
flgG	flgH	85581.CAY62_03455	85581.CAY62_03460	0.781	0	0.763	0	0.904	0.709	0	0.337	0.998
flgG	flgI	85581.CAY62_03455	85581.CAY62_03465	0.65	0	0.771	0	0.904	0.709	0	0.337	0.998
flgH	ARR48713.1	85581.CAY62_03460	85581.CAY62_03450	0.741	0	0.77	0	0.904	0.719	0	0.337	0.998
flgH	flgG	85581.CAY62_03460	85581.CAY62_03455	0.781	0	0.763	0	0.904	0.709	0	0.337	0.998
flgI	ARR48713.1	85581.CAY62_03465	85581.CAY62_03450	0.62	0	0.77	0	0.903	0.709	0	0.337	0.998
flgI	flgG	85581.CAY62_03465	85581.CAY62_03455	0.65	0	0.771	0	0.904	0.709	0	0.337	0.998
fusA-2	rpsG	85581.CAY62_12970	85581.CAY62_12975	0.587	0.431	0.738	0	0.786	0.853	0.069	0.183	0.998
gcvP	ARR49517.1	85581.CAY62_16830	85581.CAY62_07980	0	0	0	0	0.998	0	0	0	0.998
infA	rpsS	85581.CAY62_09120	85581.CAY62_12935	0.154	0	0.383	0	0.904	0.885	0.678	0.337	0.998
infA	ARR50334.1	85581.CAY62_09120	85581.CAY62_12950	0.154	0	0.172	0	0.904	0.885	0.824	0.208	0.998
infA	rpsE	85581.CAY62_09120	85581.CAY62_12870	0.154	0	0.408	0	0.904	0.885	0.655	0.166	0.998
infA	rpsQ	85581.CAY62_09120	85581.CAY62_12910	0.154	0	0.365	0	0.904	0.885	0.678	0.186	0.998
infA	rpsC	85581.CAY62_09120	85581.CAY62_12925	0.154	0	0.497	0	0.904	0.885	0.678	0.084	0.998
infA	rpsG	85581.CAY62_09120	85581.CAY62_12975	0.154	0	0.312	0	0.902	0.885	0.655	0.337	0.998
infA	rpsM	85581.CAY62_09120	85581.CAY62_12845	0.154	0	0.453	0	0.904	0.885	0.678	0.21	0.998
map	rpmD	85581.CAY62_11105	85581.CAY62_12865	0.154	0	0	0	0.894	0.872	0.818	0.196	0.998
metG	ARR49952.1	85581.CAY62_09045	85581.CAY62_10660	0.235	0	0	0.605	0.916	0.851	0.851	0.381	0.998
minE	ARR48868.1	85581.CAY62_04265	85581.CAY62_04270	0.799	0	0.772	0	0.771	0.883	0	0.19	0.998
murC	murD	85581.CAY62_12290	85581.CAY62_12305	0.771	0	0.319	0.609	0.867	0	0.9	0.337	0.998
murD	murC	85581.CAY62_12305	85581.CAY62_12290	0.771	0	0.319	0.609	0.867	0	0.9	0.337	0.998
napA	napD	85581.CAY62_03275	85581.CAY62_03270	0.799	0	0.72	0	0.808	0.885	0	0.21	0.998
napD	napA	85581.CAY62_03270	85581.CAY62_03275	0.799	0	0.72	0	0.808	0.885	0	0.21	0.998
nqrD	nqrF	85581.CAY62_03155	85581.CAY62_03165	0.732	0	0.771	0	0.75	0.851	0	0.337	0.998
nqrF	nqrD	85581.CAY62_03165	85581.CAY62_03155	0.732	0	0.771	0	0.75	0.851	0	0.337	0.998
purD	purM	85581.CAY62_00515	85581.CAY62_10810	0.154	0.9	0.773	0	0.904	0	0	0.337	0.998
purD	purE	85581.CAY62_00515	85581.CAY62_14475	0.154	0.9	0.771	0	0.901	0	0	0.337	0.998
purD	purF	85581.CAY62_00515	85581.CAY62_09740	0.154	0.039	0.742	0	0.904	0.097	0.9	0.337	0.998
purE	purD	85581.CAY62_14475	85581.CAY62_00515	0.154	0.9	0.771	0	0.901	0	0	0.337	0.998
purF	purD	85581.CAY62_09740	85581.CAY62_00515	0.154	0.039	0.742	0	0.904	0.097	0.9	0.337	0.998
purL	ARR49723.1	85581.CAY62_02995	85581.CAY62_09160	0.245	0	0	0	0.997	0	0	0.389	0.998
purM	purD	85581.CAY62_10810	85581.CAY62_00515	0.154	0.9	0.773	0	0.904	0	0	0.337	0.998
ribB	ARR49020.1	85581.CAY62_03030	85581.CAY62_05145	0.233	0.624	0.772	0	0.973	0.091	0	0.372	0.998
rplA	rplR	85581.CAY62_00445	85581.CAY62_12875	0.154	0	0.185	0	0.904	0.885	0.708	0.337	0.998
rplA	rplJ	85581.CAY62_00445	85581.CAY62_00450	0.498	0	0.194	0	0.904	0.885	0.708	0.337	0.998
rplA	rplV	85581.CAY62_00445	85581.CAY62_12930	0.154	0	0	0	0.904	0.885	0.734	0.337	0.998
rplB	rpsD	85581.CAY62_12940	85581.CAY62_12835	0.288	0	0.495	0	0.904	0.885	0.423	0.337	0.998
rplB	rpsK	85581.CAY62_12940	85581.CAY62_12840	0.297	0	0.598	0	0.904	0.885	0.411	0.337	0.998
rplB	rplO	85581.CAY62_12940	85581.CAY62_12860	0.396	0	0.305	0	0.904	0.885	0.581	0.337	0.998
rplB	rpsE	85581.CAY62_12940	85581.CAY62_12870	0.396	0	0.628	0	0.904	0.885	0.411	0.337	0.998
rplB	rplR	85581.CAY62_12940	85581.CAY62_12875	0.401	0	0.304	0	0.904	0.885	0.584	0.337	0.998
rplB	rplF	85581.CAY62_12940	85581.CAY62_12880	0.401	0	0.596	0	0.904	0.885	0.388	0.337	0.998
rplB	rpsH	85581.CAY62_12940	85581.CAY62_12885	0.405	0	0.634	0	0.904	0.885	0.431	0.337	0.998
rplB	rpsQ	85581.CAY62_12940	85581.CAY62_12910	0.689	0	0.165	0	0.904	0.885	0.237	0.337	0.998
rplB	rpmC	85581.CAY62_12940	85581.CAY62_12915	0.689	0	0	0	0.904	0.885	0.584	0.337	0.998
rplB	rplW	85581.CAY62_12940	85581.CAY62_12945	0.759	0	0.152	0	0.904	0.885	0.388	0.337	0.998
rplC	rplK	85581.CAY62_12955	85581.CAY62_00440	0.154	0	0.349	0	0.904	0.885	0.731	0.337	0.998
rplC	rplJ	85581.CAY62_12955	85581.CAY62_00450	0.154	0	0	0	0.904	0.885	0.741	0.337	0.998
rplC	rplM	85581.CAY62_12955	85581.CAY62_12405	0.154	0	0.447	0	0.904	0.885	0.706	0.337	0.998
rplC	rpmD	85581.CAY62_12955	85581.CAY62_12865	0.376	0	0	0	0.904	0.885	0.724	0.337	0.998
rplC	rplR	85581.CAY62_12955	85581.CAY62_12875	0.38	0	0.264	0	0.904	0.885	0.729	0.337	0.998
rplC	rpsH	85581.CAY62_12955	85581.CAY62_12885	0.384	0	0.657	0	0.904	0.885	0.352	0.337	0.998
rplC	rplE	85581.CAY62_12955	85581.CAY62_12895	0.424	0	0.504	0	0.904	0.885	0.588	0.337	0.998
rplC	rplX	85581.CAY62_12955	85581.CAY62_12900	0.435	0	0.229	0	0.904	0.885	0.586	0.337	0.998
rplC	rplN	85581.CAY62_12955	85581.CAY62_12905	0.44	0	0.507	0	0.904	0.885	0.588	0.337	0.998
rplC	rpmC	85581.CAY62_12955	85581.CAY62_12915	0.633	0	0	0	0.904	0.885	0.588	0.337	0.998
rplC	rpsC	85581.CAY62_12955	85581.CAY62_12925	0.64	0	0.341	0	0.904	0.885	0.37	0.337	0.998
rplE	rplM	85581.CAY62_12895	85581.CAY62_12405	0.154	0	0.464	0	0.904	0.885	0.613	0.337	0.998
rplE	rpsD	85581.CAY62_12895	85581.CAY62_12835	0.371	0	0.623	0	0.904	0.885	0.325	0.337	0.998
rplE	secY	85581.CAY62_12895	85581.CAY62_12855	0.613	0	0.606	0	0.904	0.878	0	0.337	0.998
rplE	rpmD	85581.CAY62_12895	85581.CAY62_12865	0.655	0	0	0	0.904	0.885	0.596	0.337	0.998
rplE	rplC	85581.CAY62_12895	85581.CAY62_12955	0.424	0	0.504	0	0.904	0.885	0.588	0.337	0.998
rplE	rpsQ	85581.CAY62_12895	85581.CAY62_12910	0.505	0	0.515	0	0.904	0.885	0.332	0.337	0.998
rplE	rplP	85581.CAY62_12895	85581.CAY62_12920	0.505	0	0.705	0	0.904	0.885	0.11	0.337	0.998
rplE	rpsJ	85581.CAY62_12895	85581.CAY62_12960	0.416	0	0.589	0	0.904	0.885	0.344	0.337	0.998
rplE	rpsS	85581.CAY62_12895	85581.CAY62_12935	0.468	0	0.681	0	0.904	0.885	0.344	0.337	0.998
rplE	rpmC	85581.CAY62_12895	85581.CAY62_12915	0.505	0	0	0	0.904	0.885	0.613	0.337	0.998
rplF	rplM	85581.CAY62_12880	85581.CAY62_12405	0.154	0	0.314	0	0.904	0.885	0.679	0.337	0.998
rplF	rpsD	85581.CAY62_12880	85581.CAY62_12835	0.412	0	0.392	0	0.904	0.885	0.393	0.337	0.998
rplF	rpsM	85581.CAY62_12880	85581.CAY62_12845	0.465	0	0.691	0	0.904	0.885	0	0.337	0.998
rplF	secY	85581.CAY62_12880	85581.CAY62_12855	0.73	0	0.422	0	0.904	0.878	0	0.337	0.998
rplF	rpsC	85581.CAY62_12880	85581.CAY62_12925	0.438	0	0.412	0	0.904	0.885	0.37	0.337	0.998
rplF	rplB	85581.CAY62_12880	85581.CAY62_12940	0.401	0	0.596	0	0.904	0.885	0.388	0.337	0.998
rplF	rpmC	85581.CAY62_12880	85581.CAY62_12915	0.441	0	0	0	0.904	0.885	0.709	0.337	0.998
rplF	rpsS	85581.CAY62_12880	85581.CAY62_12935	0.414	0	0.521	0	0.904	0.885	0.365	0.337	0.998
rplF	rplW	85581.CAY62_12880	85581.CAY62_12945	0.389	0	0	0	0.904	0.885	0.706	0.337	0.998
rplJ	rplA	85581.CAY62_00450	85581.CAY62_00445	0.498	0	0.194	0	0.904	0.885	0.708	0.337	0.998
rplJ	rplC	85581.CAY62_00450	85581.CAY62_12955	0.154	0	0	0	0.904	0.885	0.741	0.337	0.998
rplJ	rplX	85581.CAY62_00450	85581.CAY62_12900	0.154	0	0	0	0.904	0.885	0.747	0.337	0.998
rplJ	rplR	85581.CAY62_00450	85581.CAY62_12875	0.154	0	0	0	0.904	0.885	0.794	0.337	0.998
rplJ	rpsA	85581.CAY62_00450	85581.CAY62_08215	0	0	0	0	0.903	0.88	0.849	0.337	0.998
rplJ	rpsE	85581.CAY62_00450	85581.CAY62_12870	0.154	0	0	0	0.904	0.885	0.851	0.337	0.998
rplJ	rpsD	85581.CAY62_00450	85581.CAY62_12835	0.102	0	0	0	0.904	0.885	0.851	0.337	0.998
rplJ	rplV	85581.CAY62_00450	85581.CAY62_12930	0.154	0	0	0	0.904	0.885	0.802	0.337	0.998
rplJ	rplW	85581.CAY62_00450	85581.CAY62_12945	0.154	0	0	0	0.904	0.885	0.841	0.337	0.998
rplJ	rpmD	85581.CAY62_00450	85581.CAY62_12865	0.154	0	0	0	0.904	0.885	0.842	0.211	0.998
rplJ	ARR50334.1	85581.CAY62_00450	85581.CAY62_12950	0.154	0	0	0	0.904	0.885	0.729	0.337	0.998
rplK	rplC	85581.CAY62_00440	85581.CAY62_12955	0.154	0	0.349	0	0.904	0.885	0.731	0.337	0.998
rplK	rplL	85581.CAY62_00440	85581.CAY62_00455	0.424	0	0.709	0	0.904	0.885	0	0.337	0.998
rplL	rplK	85581.CAY62_00455	85581.CAY62_00440	0.424	0	0.709	0	0.904	0.885	0	0.337	0.998
rplM	rplV	85581.CAY62_12405	85581.CAY62_12930	0.154	0	0.207	0	0.904	0.885	0.729	0.337	0.998
rplM	rplE	85581.CAY62_12405	85581.CAY62_12895	0.154	0	0.464	0	0.904	0.885	0.613	0.337	0.998
rplM	rplO	85581.CAY62_12405	85581.CAY62_12860	0.154	0	0.496	0	0.904	0.885	0.739	0.337	0.998
rplM	rplF	85581.CAY62_12405	85581.CAY62_12880	0.154	0	0.314	0	0.904	0.885	0.679	0.337	0.998
rplM	rplC	85581.CAY62_12405	85581.CAY62_12955	0.154	0	0.447	0	0.904	0.885	0.706	0.337	0.998
rplM	rplP	85581.CAY62_12405	85581.CAY62_12920	0.154	0	0.399	0	0.904	0.885	0.655	0.337	0.998
rplM	rplR	85581.CAY62_12405	85581.CAY62_12875	0.154	0	0.277	0	0.904	0.885	0.742	0.337	0.998
rplN	rpsD	85581.CAY62_12905	85581.CAY62_12835	0.36	0	0.446	0	0.904	0.885	0.508	0.337	0.998
rplN	rpsM	85581.CAY62_12905	85581.CAY62_12845	0.398	0	0.726	0	0.904	0.885	0	0.337	0.998
rplN	secY	85581.CAY62_12905	85581.CAY62_12855	0.585	0	0.594	0	0.904	0.878	0	0.337	0.998
rplN	rplO	85581.CAY62_12905	85581.CAY62_12860	0.624	0	0.237	0	0.904	0.885	0.604	0.337	0.998
rplN	rpmD	85581.CAY62_12905	85581.CAY62_12865	0.624	0	0	0	0.904	0.885	0.596	0.337	0.998
rplN	rplX	85581.CAY62_12905	85581.CAY62_12900	0.785	0	0	0	0.904	0.885	0.391	0.337	0.998
rplN	rpsQ	85581.CAY62_12905	85581.CAY62_12910	0.526	0	0.3	0	0.904	0.885	0.527	0.337	0.998
rplN	rplC	85581.CAY62_12905	85581.CAY62_12955	0.44	0	0.507	0	0.904	0.885	0.588	0.337	0.998
rplN	rpsG	85581.CAY62_12905	85581.CAY62_12975	0.154	0	0.54	0	0.904	0.885	0.685	0.337	0.998
rplN	rpmC	85581.CAY62_12905	85581.CAY62_12915	0.526	0	0	0	0.904	0.885	0.613	0.337	0.998
rplN	rpsJ	85581.CAY62_12905	85581.CAY62_12960	0.431	0	0.535	0	0.904	0.885	0.53	0.337	0.998
rplO	rplM	85581.CAY62_12860	85581.CAY62_12405	0.154	0	0.496	0	0.904	0.885	0.739	0.337	0.998
rplO	rpsD	85581.CAY62_12860	85581.CAY62_12835	0.416	0	0.533	0	0.904	0.885	0.373	0.337	0.998
rplO	secY	85581.CAY62_12860	85581.CAY62_12855	0.743	0	0.237	0	0.904	0.876	0	0.337	0.998
rplO	rplW	85581.CAY62_12860	85581.CAY62_12945	0.385	0	0.156	0	0.904	0.885	0.725	0.337	0.998
rplO	rpmC	85581.CAY62_12860	85581.CAY62_12915	0.436	0	0	0	0.904	0.885	0.604	0.337	0.998
rplO	rplN	85581.CAY62_12860	85581.CAY62_12905	0.624	0	0.237	0	0.904	0.885	0.604	0.337	0.998
rplO	rplB	85581.CAY62_12860	85581.CAY62_12940	0.396	0	0.305	0	0.904	0.885	0.581	0.337	0.998
rplO	rplX	85581.CAY62_12860	85581.CAY62_12900	0.633	0	0	0	0.904	0.885	0.381	0.337	0.998
rplP	rplM	85581.CAY62_12920	85581.CAY62_12405	0.154	0	0.399	0	0.904	0.885	0.655	0.337	0.998
rplP	rpsM	85581.CAY62_12920	85581.CAY62_12845	0.319	0	0.667	0	0.904	0.885	0.22	0.337	0.998
rplP	secY	85581.CAY62_12920	85581.CAY62_12855	0.416	0	0.627	0	0.904	0.878	0	0.337	0.998
rplP	rplR	85581.CAY62_12920	85581.CAY62_12875	0.441	0	0.45	0	0.904	0.885	0.621	0.337	0.998
rplP	rplE	85581.CAY62_12920	85581.CAY62_12895	0.505	0	0.705	0	0.904	0.885	0.11	0.337	0.998
rplP	rpmC	85581.CAY62_12920	85581.CAY62_12915	0.799	0	0	0	0.904	0.885	0.11	0.337	0.998
rplP	rplW	85581.CAY62_12920	85581.CAY62_12945	0.656	0	0	0	0.904	0.885	0.655	0.337	0.998
rplR	rplA	85581.CAY62_12875	85581.CAY62_00445	0.154	0	0.185	0	0.904	0.885	0.708	0.337	0.998
rplR	rplJ	85581.CAY62_12875	85581.CAY62_00450	0.154	0	0	0	0.904	0.885	0.794	0.337	0.998
rplR	rplM	85581.CAY62_12875	85581.CAY62_12405	0.154	0	0.277	0	0.904	0.885	0.742	0.337	0.998
rplR	rpsD	85581.CAY62_12875	85581.CAY62_12835	0.412	0	0.535	0	0.904	0.885	0.37	0.337	0.998
rplR	rpsK	85581.CAY62_12875	85581.CAY62_12840	0.447	0	0.433	0	0.904	0.885	0.359	0.337	0.998
rplR	rpmC	85581.CAY62_12875	85581.CAY62_12915	0.441	0	0	0	0.904	0.885	0.751	0.242	0.998
rplR	ARR50334.1	85581.CAY62_12875	85581.CAY62_12950	0.389	0	0.279	0	0.904	0.885	0.675	0.337	0.998
rplR	rplP	85581.CAY62_12875	85581.CAY62_12920	0.441	0	0.45	0	0.904	0.885	0.621	0.337	0.998
rplR	rplC	85581.CAY62_12875	85581.CAY62_12955	0.38	0	0.264	0	0.904	0.885	0.729	0.337	0.998
rplR	rplB	85581.CAY62_12875	85581.CAY62_12940	0.401	0	0.304	0	0.904	0.885	0.584	0.337	0.998
rplS	rpsP	85581.CAY62_11420	85581.CAY62_11435	0.589	0	0.475	0	0.904	0.885	0	0.337	0.998
rplV	rplA	85581.CAY62_12930	85581.CAY62_00445	0.154	0	0	0	0.904	0.885	0.734	0.337	0.998
rplV	rplJ	85581.CAY62_12930	85581.CAY62_00450	0.154	0	0	0	0.904	0.885	0.802	0.337	0.998
rplV	rplM	85581.CAY62_12930	85581.CAY62_12405	0.154	0	0.207	0	0.904	0.885	0.729	0.337	0.998
rplV	rpsD	85581.CAY62_12930	85581.CAY62_12835	0.294	0	0.603	0	0.904	0.885	0.393	0.337	0.998
rplV	rpmD	85581.CAY62_12930	85581.CAY62_12865	0.416	0	0	0	0.904	0.885	0.808	0.255	0.998
rplV	rpsE	85581.CAY62_12930	85581.CAY62_12870	0.416	0	0.498	0	0.904	0.885	0.373	0.337	0.998
rplV	rpsQ	85581.CAY62_12930	85581.CAY62_12910	0.745	0	0.469	0	0.904	0.885	0	0.337	0.998
rplW	rplJ	85581.CAY62_12945	85581.CAY62_00450	0.154	0	0	0	0.904	0.885	0.841	0.337	0.998
rplW	rplO	85581.CAY62_12945	85581.CAY62_12860	0.385	0	0.156	0	0.904	0.885	0.725	0.337	0.998
rplW	rplF	85581.CAY62_12945	85581.CAY62_12880	0.389	0	0	0	0.904	0.885	0.706	0.337	0.998
rplW	rplX	85581.CAY62_12945	85581.CAY62_12900	0.446	0	0.169	0	0.904	0.885	0.747	0.337	0.998
rplW	rplP	85581.CAY62_12945	85581.CAY62_12920	0.656	0	0	0	0.904	0.885	0.655	0.337	0.998
rplW	rpsC	85581.CAY62_12945	85581.CAY62_12925	0.663	0	0	0	0.904	0.885	0.37	0.337	0.998
rplW	rpsS	85581.CAY62_12945	85581.CAY62_12935	0.721	0	0	0	0.904	0.885	0.365	0.337	0.998
rplW	rplB	85581.CAY62_12945	85581.CAY62_12940	0.759	0	0.152	0	0.904	0.885	0.388	0.337	0.998
rplW	rpsJ	85581.CAY62_12945	85581.CAY62_12960	0.745	0	0.198	0	0.904	0.885	0.406	0.337	0.998
rplX	rplJ	85581.CAY62_12900	85581.CAY62_00450	0.154	0	0	0	0.904	0.885	0.747	0.337	0.998
rplX	rplO	85581.CAY62_12900	85581.CAY62_12860	0.633	0	0	0	0.904	0.885	0.381	0.337	0.998
rplX	rpsE	85581.CAY62_12900	85581.CAY62_12870	0.633	0	0.169	0	0.904	0.885	0.351	0.337	0.998
rplX	rpsH	85581.CAY62_12900	85581.CAY62_12885	0.655	0	0.232	0	0.904	0.885	0.351	0.337	0.998
rplX	rplW	85581.CAY62_12900	85581.CAY62_12945	0.446	0	0.169	0	0.904	0.885	0.747	0.337	0.998
rplX	rpmC	85581.CAY62_12900	85581.CAY62_12915	0.519	0	0	0	0.904	0.885	0.729	0.337	0.998
rplX	ARR50334.1	85581.CAY62_12900	85581.CAY62_12950	0.446	0	0.159	0	0.904	0.885	0.59	0.337	0.998
rplX	rplN	85581.CAY62_12900	85581.CAY62_12905	0.785	0	0	0	0.904	0.885	0.391	0.337	0.998
rplX	rplC	85581.CAY62_12900	85581.CAY62_12955	0.435	0	0.229	0	0.904	0.885	0.586	0.337	0.998
rpmC	rplO	85581.CAY62_12915	85581.CAY62_12860	0.436	0	0	0	0.904	0.885	0.604	0.337	0.998
rpmC	rpmD	85581.CAY62_12915	85581.CAY62_12865	0.436	0	0	0	0.904	0.885	0.745	0.337	0.998
rpmC	rplR	85581.CAY62_12915	85581.CAY62_12875	0.441	0	0	0	0.904	0.885	0.751	0.242	0.998
rpmC	rplF	85581.CAY62_12915	85581.CAY62_12880	0.441	0	0	0	0.904	0.885	0.709	0.337	0.998
rpmC	rplE	85581.CAY62_12915	85581.CAY62_12895	0.505	0	0	0	0.904	0.885	0.613	0.337	0.998
rpmC	rplX	85581.CAY62_12915	85581.CAY62_12900	0.519	0	0	0	0.904	0.885	0.729	0.337	0.998
rpmC	rplN	85581.CAY62_12915	85581.CAY62_12905	0.526	0	0	0	0.904	0.885	0.613	0.337	0.998
rpmC	rpsQ	85581.CAY62_12915	85581.CAY62_12910	0.799	0	0	0	0.904	0.885	0	0.337	0.998
rpmC	rplB	85581.CAY62_12915	85581.CAY62_12940	0.689	0	0	0	0.904	0.885	0.584	0.337	0.998
rpmC	rpsC	85581.CAY62_12915	85581.CAY62_12925	0.79	0	0	0	0.904	0.885	0	0.337	0.998
rpmC	rplC	85581.CAY62_12915	85581.CAY62_12955	0.633	0	0	0	0.904	0.885	0.588	0.337	0.998
rpmC	rplP	85581.CAY62_12915	85581.CAY62_12920	0.799	0	0	0	0.904	0.885	0.11	0.337	0.998
rpmD	rplJ	85581.CAY62_12865	85581.CAY62_00450	0.154	0	0	0	0.904	0.885	0.842	0.211	0.998
rpmD	map	85581.CAY62_12865	85581.CAY62_11105	0.154	0	0	0	0.894	0.872	0.818	0.196	0.998
rpmD	rpmC	85581.CAY62_12865	85581.CAY62_12915	0.436	0	0	0	0.904	0.885	0.745	0.337	0.998
rpmD	rplC	85581.CAY62_12865	85581.CAY62_12955	0.376	0	0	0	0.904	0.885	0.724	0.337	0.998
rpmD	rpsH	85581.CAY62_12865	85581.CAY62_12885	0.77	0	0	0	0.904	0.885	0.35	0.337	0.998
rpmD	rplV	85581.CAY62_12865	85581.CAY62_12930	0.416	0	0	0	0.904	0.885	0.808	0.255	0.998
rpmD	rplN	85581.CAY62_12865	85581.CAY62_12905	0.624	0	0	0	0.904	0.885	0.596	0.337	0.998
rpmD	rpsE	85581.CAY62_12865	85581.CAY62_12870	0.799	0	0	0	0.904	0.885	0.35	0.337	0.998
rpmD	rplE	85581.CAY62_12865	85581.CAY62_12895	0.655	0	0	0	0.904	0.885	0.596	0.337	0.998
rpoA	rpoZ	85581.CAY62_12830	85581.CAY62_13545	0.154	0	0	0	0.851	0.885	0.851	0.337	0.998
rpoZ	rpoA	85581.CAY62_13545	85581.CAY62_12830	0.154	0	0	0	0.851	0.885	0.851	0.337	0.998
rpsA	rplJ	85581.CAY62_08215	85581.CAY62_00450	0	0	0	0	0.903	0.88	0.849	0.337	0.998
rpsA	rpsC	85581.CAY62_08215	85581.CAY62_12925	0.057	0	0.271	0	0.861	0.851	0.851	0.337	0.998
rpsA	rpsD	85581.CAY62_08215	85581.CAY62_12835	0	0	0	0	0.904	0.885	0.851	0.337	0.998
rpsA	rpsE	85581.CAY62_08215	85581.CAY62_12870	0.044	0	0	0	0.868	0.869	0.851	0.337	0.998
rpsA	ARR50334.1	85581.CAY62_08215	85581.CAY62_12950	0.06	0	0.153	0	0.903	0.885	0.851	0.27	0.998
rpsA	rpsJ	85581.CAY62_08215	85581.CAY62_12960	0.063	0	0	0	0.9	0.877	0.851	0.205	0.998
rpsA	rpsB	85581.CAY62_08215	85581.CAY62_11100	0.102	0	0	0	0.901	0.883	0.851	0.337	0.998
rpsA	rpsL	85581.CAY62_08215	85581.CAY62_12980	0	0	0	0	0.901	0.885	0.851	0.332	0.998
rpsA	rpsH	85581.CAY62_08215	85581.CAY62_12885	0.044	0	0	0	0.904	0.885	0.851	0.337	0.998
rpsA	rpsG	85581.CAY62_08215	85581.CAY62_12975	0	0	0	0	0.902	0.885	0.851	0.337	0.998
rpsA	rpsK	85581.CAY62_08215	85581.CAY62_12840	0	0	0	0	0.902	0.885	0.851	0.332	0.998
rpsB	rpsF	85581.CAY62_11100	85581.CAY62_00935	0.054	0	0	0	0.904	0.885	0.851	0.337	0.998
rpsB	rpsR	85581.CAY62_11100	85581.CAY62_00945	0.051	0	0.179	0	0.904	0.885	0.851	0.337	0.998
rpsB	rpsO	85581.CAY62_11100	85581.CAY62_02105	0.102	0	0	0	0.903	0.885	0.851	0.337	0.998
rpsB	rpsA	85581.CAY62_11100	85581.CAY62_08215	0.102	0	0	0	0.901	0.883	0.851	0.337	0.998
rpsB	rpsQ	85581.CAY62_11100	85581.CAY62_12910	0.07	0	0	0	0.904	0.885	0.851	0.337	0.998
rpsB	rpsS	85581.CAY62_11100	85581.CAY62_12935	0.069	0	0.179	0	0.904	0.885	0.851	0.337	0.998
rpsB	rpsJ	85581.CAY62_11100	85581.CAY62_12960	0.072	0	0.157	0	0.904	0.885	0.851	0.337	0.998
rpsC	rpsF	85581.CAY62_12925	85581.CAY62_00935	0	0	0	0	0.904	0.885	0.851	0.337	0.998
rpsC	rpsR	85581.CAY62_12925	85581.CAY62_00945	0	0	0	0	0.904	0.885	0.851	0.211	0.998
rpsC	rpsO	85581.CAY62_12925	85581.CAY62_02105	0	0	0	0	0.904	0.885	0.851	0.337	0.998
rpsC	rpsA	85581.CAY62_12925	85581.CAY62_08215	0.057	0	0.271	0	0.861	0.851	0.851	0.337	0.998
rpsC	infA	85581.CAY62_12925	85581.CAY62_09120	0.154	0	0.497	0	0.904	0.885	0.678	0.084	0.998
rpsC	rpsI	85581.CAY62_12925	85581.CAY62_12400	0.154	0	0	0	0.9	0.885	0.851	0.337	0.998
rpsC	rplF	85581.CAY62_12925	85581.CAY62_12880	0.438	0	0.412	0	0.904	0.885	0.37	0.337	0.998
rpsC	rpmC	85581.CAY62_12925	85581.CAY62_12915	0.79	0	0	0	0.904	0.885	0	0.337	0.998
rpsC	rplC	85581.CAY62_12925	85581.CAY62_12955	0.64	0	0.341	0	0.904	0.885	0.37	0.337	0.998
rpsC	rplW	85581.CAY62_12925	85581.CAY62_12945	0.663	0	0	0	0.904	0.885	0.37	0.337	0.998
rpsD	rplJ	85581.CAY62_12835	85581.CAY62_00450	0.102	0	0	0	0.904	0.885	0.851	0.337	0.998
rpsD	rpsF	85581.CAY62_12835	85581.CAY62_00935	0.056	0	0	0	0.904	0.885	0.851	0.337	0.998
rpsD	rpsO	85581.CAY62_12835	85581.CAY62_02105	0.056	0	0	0	0.904	0.885	0.851	0.337	0.998
rpsD	rpsA	85581.CAY62_12835	85581.CAY62_08215	0	0	0	0	0.904	0.885	0.851	0.337	0.998
rpsD	rpsP	85581.CAY62_12835	85581.CAY62_11435	0.049	0	0.162	0	0.904	0.885	0.851	0.337	0.998
rpsD	rplR	85581.CAY62_12835	85581.CAY62_12875	0.412	0	0.535	0	0.904	0.885	0.37	0.337	0.998
rpsD	rplF	85581.CAY62_12835	85581.CAY62_12880	0.412	0	0.392	0	0.904	0.885	0.393	0.337	0.998
rpsD	rplO	85581.CAY62_12835	85581.CAY62_12860	0.416	0	0.533	0	0.904	0.885	0.373	0.337	0.998
rpsD	rplE	85581.CAY62_12835	85581.CAY62_12895	0.371	0	0.623	0	0.904	0.885	0.325	0.337	0.998
rpsD	rplN	85581.CAY62_12835	85581.CAY62_12905	0.36	0	0.446	0	0.904	0.885	0.508	0.337	0.998
rpsD	rplV	85581.CAY62_12835	85581.CAY62_12930	0.294	0	0.603	0	0.904	0.885	0.393	0.337	0.998
rpsD	rplB	85581.CAY62_12835	85581.CAY62_12940	0.288	0	0.495	0	0.904	0.885	0.423	0.337	0.998
rpsE	rplJ	85581.CAY62_12870	85581.CAY62_00450	0.154	0	0	0	0.904	0.885	0.851	0.337	0.998
rpsE	rpsF	85581.CAY62_12870	85581.CAY62_00935	0	0	0.163	0	0.904	0.885	0.851	0.337	0.998
rpsE	rpsR	85581.CAY62_12870	85581.CAY62_00945	0	0	0.221	0	0.902	0.885	0.851	0.201	0.998
rpsE	rpsO	85581.CAY62_12870	85581.CAY62_02105	0	0	0	0	0.902	0.885	0.851	0.337	0.998
rpsE	rpsA	85581.CAY62_12870	85581.CAY62_08215	0.044	0	0	0	0.868	0.869	0.851	0.337	0.998
rpsE	infA	85581.CAY62_12870	85581.CAY62_09120	0.154	0	0.408	0	0.904	0.885	0.655	0.166	0.998
rpsE	rpsP	85581.CAY62_12870	85581.CAY62_11435	0	0	0	0	0.886	0.885	0.851	0.337	0.998
rpsE	rpmD	85581.CAY62_12870	85581.CAY62_12865	0.799	0	0	0	0.904	0.885	0.35	0.337	0.998
rpsE	rplB	85581.CAY62_12870	85581.CAY62_12940	0.396	0	0.628	0	0.904	0.885	0.411	0.337	0.998
rpsE	rplV	85581.CAY62_12870	85581.CAY62_12930	0.416	0	0.498	0	0.904	0.885	0.373	0.337	0.998
rpsE	rplX	85581.CAY62_12870	85581.CAY62_12900	0.633	0	0.169	0	0.904	0.885	0.351	0.337	0.998
rpsF	rpsK	85581.CAY62_00935	85581.CAY62_12840	0.061	0	0	0	0.904	0.885	0.851	0.337	0.998
rpsF	rpsN	85581.CAY62_00935	85581.CAY62_12890	0	0	0	0	0.902	0.885	0.851	0.337	0.998
rpsF	rpsO	85581.CAY62_00935	85581.CAY62_02105	0	0	0	0	0.868	0.885	0.851	0.337	0.998
rpsF	rpsH	85581.CAY62_00935	85581.CAY62_12885	0	0	0	0	0.904	0.885	0.851	0.337	0.998
rpsF	rpsM	85581.CAY62_00935	85581.CAY62_12845	0.063	0	0	0	0.904	0.885	0.851	0.337	0.998
rpsF	rpsL	85581.CAY62_00935	85581.CAY62_12980	0.095	0	0	0	0.904	0.885	0.851	0.212	0.998
rpsF	rpsB	85581.CAY62_00935	85581.CAY62_11100	0.054	0	0	0	0.904	0.885	0.851	0.337	0.998
rpsF	rpsG	85581.CAY62_00935	85581.CAY62_12975	0.097	0	0	0	0.904	0.885	0.851	0.337	0.998
rpsF	rpsJ	85581.CAY62_00935	85581.CAY62_12960	0	0	0	0	0.904	0.885	0.851	0.337	0.998
rpsF	rpsS	85581.CAY62_00935	85581.CAY62_12935	0	0	0	0	0.904	0.885	0.851	0.337	0.998
rpsF	rpsQ	85581.CAY62_00935	85581.CAY62_12910	0	0	0	0	0.903	0.885	0.851	0.337	0.998
rpsF	rpsI	85581.CAY62_00935	85581.CAY62_12400	0	0	0	0	0.904	0.885	0.851	0.337	0.998
rpsF	rpsC	85581.CAY62_00935	85581.CAY62_12925	0	0	0	0	0.904	0.885	0.851	0.337	0.998
rpsF	rpsP	85581.CAY62_00935	85581.CAY62_11435	0	0	0	0	0.904	0.885	0.851	0.337	0.998
rpsF	rpsE	85581.CAY62_00935	85581.CAY62_12870	0	0	0.163	0	0.904	0.885	0.851	0.337	0.998
rpsF	rpsD	85581.CAY62_00935	85581.CAY62_12835	0.056	0	0	0	0.904	0.885	0.851	0.337	0.998
rpsG	rpsF	85581.CAY62_12975	85581.CAY62_00935	0.097	0	0	0	0.904	0.885	0.851	0.337	0.998
rpsG	rpsR	85581.CAY62_12975	85581.CAY62_00945	0.08	0	0	0	0.904	0.885	0.851	0.207	0.998
rpsG	rpsO	85581.CAY62_12975	85581.CAY62_02105	0	0	0	0	0.904	0.885	0.851	0.337	0.998
rpsG	rpsA	85581.CAY62_12975	85581.CAY62_08215	0	0	0	0	0.902	0.885	0.851	0.337	0.998
rpsG	infA	85581.CAY62_12975	85581.CAY62_09120	0.154	0	0.312	0	0.902	0.885	0.655	0.337	0.998
rpsG	rpsP	85581.CAY62_12975	85581.CAY62_11435	0	0	0	0	0.904	0.885	0.851	0.337	0.998
rpsG	rpsI	85581.CAY62_12975	85581.CAY62_12400	0.154	0	0	0	0.903	0.885	0.851	0.337	0.998
rpsG	rpsN	85581.CAY62_12975	85581.CAY62_12890	0.154	0	0	0	0.904	0.885	0.851	0.337	0.998
rpsG	rplN	85581.CAY62_12975	85581.CAY62_12905	0.154	0	0.54	0	0.904	0.885	0.685	0.337	0.998
rpsG	rpsQ	85581.CAY62_12975	85581.CAY62_12910	0.154	0	0	0	0.904	0.885	0.851	0.337	0.998
rpsG	fusA-2	85581.CAY62_12975	85581.CAY62_12970	0.587	0.431	0.738	0	0.786	0.853	0.069	0.183	0.998
rpsH	rpsF	85581.CAY62_12885	85581.CAY62_00935	0	0	0	0	0.904	0.885	0.851	0.337	0.998
rpsH	rpsA	85581.CAY62_12885	85581.CAY62_08215	0.044	0	0	0	0.904	0.885	0.851	0.337	0.998
rpsH	rpsP	85581.CAY62_12885	85581.CAY62_11435	0	0	0	0	0.904	0.885	0.851	0.337	0.998
rpsH	rpmD	85581.CAY62_12885	85581.CAY62_12865	0.77	0	0	0	0.904	0.885	0.35	0.337	0.998
rpsH	rplX	85581.CAY62_12885	85581.CAY62_12900	0.655	0	0.232	0	0.904	0.885	0.351	0.337	0.998
rpsH	rplB	85581.CAY62_12885	85581.CAY62_12940	0.405	0	0.634	0	0.904	0.885	0.431	0.337	0.998
rpsH	rplC	85581.CAY62_12885	85581.CAY62_12955	0.384	0	0.657	0	0.904	0.885	0.352	0.337	0.998
rpsI	rpsF	85581.CAY62_12400	85581.CAY62_00935	0	0	0	0	0.904	0.885	0.851	0.337	0.998
rpsI	rpsL	85581.CAY62_12400	85581.CAY62_12980	0.154	0	0	0	0.903	0.885	0.851	0.337	0.998
rpsI	rpsG	85581.CAY62_12400	85581.CAY62_12975	0.154	0	0	0	0.903	0.885	0.851	0.337	0.998
rpsI	rpsN	85581.CAY62_12400	85581.CAY62_12890	0.154	0	0	0	0.865	0.885	0.851	0.337	0.998
rpsI	rpsC	85581.CAY62_12400	85581.CAY62_12925	0.154	0	0	0	0.9	0.885	0.851	0.337	0.998
rpsJ	rpsF	85581.CAY62_12960	85581.CAY62_00935	0	0	0	0	0.904	0.885	0.851	0.337	0.998
rpsJ	rpsO	85581.CAY62_12960	85581.CAY62_02105	0	0	0	0	0.902	0.885	0.851	0.337	0.998
rpsJ	rpsA	85581.CAY62_12960	85581.CAY62_08215	0.063	0	0	0	0.9	0.877	0.851	0.205	0.998
rpsJ	rpsB	85581.CAY62_12960	85581.CAY62_11100	0.072	0	0.157	0	0.904	0.885	0.851	0.337	0.998
rpsJ	rpsP	85581.CAY62_12960	85581.CAY62_11435	0	0	0	0	0.904	0.885	0.851	0.337	0.998
rpsJ	rplE	85581.CAY62_12960	85581.CAY62_12895	0.416	0	0.589	0	0.904	0.885	0.344	0.337	0.998
rpsJ	rplN	85581.CAY62_12960	85581.CAY62_12905	0.431	0	0.535	0	0.904	0.885	0.53	0.337	0.998
rpsJ	rplW	85581.CAY62_12960	85581.CAY62_12945	0.745	0	0.198	0	0.904	0.885	0.406	0.337	0.998
rpsK	rpsF	85581.CAY62_12840	85581.CAY62_00935	0.061	0	0	0	0.904	0.885	0.851	0.337	0.998
rpsK	rpsR	85581.CAY62_12840	85581.CAY62_00945	0	0	0	0	0.904	0.885	0.851	0.2	0.998
rpsK	rpsO	85581.CAY62_12840	85581.CAY62_02105	0.051	0	0	0	0.904	0.885	0.851	0.337	0.998
rpsK	rpsA	85581.CAY62_12840	85581.CAY62_08215	0	0	0	0	0.902	0.885	0.851	0.332	0.998
rpsK	rpsP	85581.CAY62_12840	85581.CAY62_11435	0.075	0	0	0	0.904	0.885	0.851	0.337	0.998
rpsK	rplR	85581.CAY62_12840	85581.CAY62_12875	0.447	0	0.433	0	0.904	0.885	0.359	0.337	0.998
rpsK	rplB	85581.CAY62_12840	85581.CAY62_12940	0.297	0	0.598	0	0.904	0.885	0.411	0.337	0.998
rpsL	rpsF	85581.CAY62_12980	85581.CAY62_00935	0.095	0	0	0	0.904	0.885	0.851	0.212	0.998
rpsL	rpsO	85581.CAY62_12980	85581.CAY62_02105	0	0	0	0	0.903	0.885	0.851	0.337	0.998
rpsL	rpsA	85581.CAY62_12980	85581.CAY62_08215	0	0	0	0	0.901	0.885	0.851	0.332	0.998
rpsL	rpsP	85581.CAY62_12980	85581.CAY62_11435	0	0	0	0	0.904	0.885	0.851	0.337	0.998
rpsL	rpsI	85581.CAY62_12980	85581.CAY62_12400	0.154	0	0	0	0.903	0.885	0.851	0.337	0.998
rpsL	rpsQ	85581.CAY62_12980	85581.CAY62_12910	0.154	0	0	0	0.904	0.885	0.851	0.337	0.998
rpsM	rpsF	85581.CAY62_12845	85581.CAY62_00935	0.063	0	0	0	0.904	0.885	0.851	0.337	0.998
rpsM	rpsO	85581.CAY62_12845	85581.CAY62_02105	0.041	0	0.22	0	0.904	0.885	0.851	0.337	0.998
rpsM	infA	85581.CAY62_12845	85581.CAY62_09120	0.154	0	0.453	0	0.904	0.885	0.678	0.21	0.998
rpsM	rpsP	85581.CAY62_12845	85581.CAY62_11435	0.073	0	0	0	0.878	0.885	0.851	0.337	0.998
rpsM	rplP	85581.CAY62_12845	85581.CAY62_12920	0.319	0	0.667	0	0.904	0.885	0.22	0.337	0.998
rpsM	rplN	85581.CAY62_12845	85581.CAY62_12905	0.398	0	0.726	0	0.904	0.885	0	0.337	0.998
rpsM	rplF	85581.CAY62_12845	85581.CAY62_12880	0.465	0	0.691	0	0.904	0.885	0	0.337	0.998
rpsN	rpsF	85581.CAY62_12890	85581.CAY62_00935	0	0	0	0	0.902	0.885	0.851	0.337	0.998
rpsN	rpsO	85581.CAY62_12890	85581.CAY62_02105	0	0	0.183	0	0.903	0.885	0.851	0.337	0.998
rpsN	rpsP	85581.CAY62_12890	85581.CAY62_11435	0	0	0	0	0.898	0.885	0.851	0.337	0.998
rpsN	rpsI	85581.CAY62_12890	85581.CAY62_12400	0.154	0	0	0	0.865	0.885	0.851	0.337	0.998
rpsN	rpsG	85581.CAY62_12890	85581.CAY62_12975	0.154	0	0	0	0.904	0.885	0.851	0.337	0.998
rpsO	rpsF	85581.CAY62_02105	85581.CAY62_00935	0	0	0	0	0.868	0.885	0.851	0.337	0.998
rpsO	rpsR	85581.CAY62_02105	85581.CAY62_00945	0	0	0.156	0	0.903	0.885	0.851	0.209	0.998
rpsO	rpsJ	85581.CAY62_02105	85581.CAY62_12960	0	0	0	0	0.902	0.885	0.851	0.337	0.998
rpsO	rpsS	85581.CAY62_02105	85581.CAY62_12935	0	0	0.152	0	0.904	0.885	0.851	0.337	0.998
rpsO	ARR50334.1	85581.CAY62_02105	85581.CAY62_12950	0.046	0	0.169	0	0.899	0.885	0.851	0.264	0.998
rpsO	rpsE	85581.CAY62_02105	85581.CAY62_12870	0	0	0	0	0.902	0.885	0.851	0.337	0.998
rpsO	rpsD	85581.CAY62_02105	85581.CAY62_12835	0.056	0	0	0	0.904	0.885	0.851	0.337	0.998
rpsO	rpsC	85581.CAY62_02105	85581.CAY62_12925	0	0	0	0	0.904	0.885	0.851	0.337	0.998
rpsO	rpsP	85581.CAY62_02105	85581.CAY62_11435	0.066	0	0	0	0.904	0.885	0.851	0.337	0.998
rpsO	rpsN	85581.CAY62_02105	85581.CAY62_12890	0	0	0.183	0	0.903	0.885	0.851	0.337	0.998
rpsO	rpsK	85581.CAY62_02105	85581.CAY62_12840	0.051	0	0	0	0.904	0.885	0.851	0.337	0.998
rpsO	rpsG	85581.CAY62_02105	85581.CAY62_12975	0	0	0	0	0.904	0.885	0.851	0.337	0.998
rpsO	rpsM	85581.CAY62_02105	85581.CAY62_12845	0.041	0	0.22	0	0.904	0.885	0.851	0.337	0.998
rpsO	rpsL	85581.CAY62_02105	85581.CAY62_12980	0	0	0	0	0.903	0.885	0.851	0.337	0.998
rpsO	rpsB	85581.CAY62_02105	85581.CAY62_11100	0.102	0	0	0	0.903	0.885	0.851	0.337	0.998
rpsP	rpsF	85581.CAY62_11435	85581.CAY62_00935	0	0	0	0	0.904	0.885	0.851	0.337	0.998
rpsP	rpsO	85581.CAY62_11435	85581.CAY62_02105	0.066	0	0	0	0.904	0.885	0.851	0.337	0.998
rpsP	rplS	85581.CAY62_11435	85581.CAY62_11420	0.589	0	0.475	0	0.904	0.885	0	0.337	0.998
rpsP	rpsD	85581.CAY62_11435	85581.CAY62_12835	0.049	0	0.162	0	0.904	0.885	0.851	0.337	0.998
rpsP	rpsE	85581.CAY62_11435	85581.CAY62_12870	0	0	0	0	0.886	0.885	0.851	0.337	0.998
rpsP	rpsQ	85581.CAY62_11435	85581.CAY62_12910	0	0	0	0	0.889	0.885	0.85	0.337	0.998
rpsP	rpsJ	85581.CAY62_11435	85581.CAY62_12960	0	0	0	0	0.904	0.885	0.851	0.337	0.998
rpsP	rpsG	85581.CAY62_11435	85581.CAY62_12975	0	0	0	0	0.904	0.885	0.851	0.337	0.998
rpsP	rpsM	85581.CAY62_11435	85581.CAY62_12845	0.073	0	0	0	0.878	0.885	0.851	0.337	0.998
rpsP	rpsL	85581.CAY62_11435	85581.CAY62_12980	0	0	0	0	0.904	0.885	0.851	0.337	0.998
rpsP	rpsH	85581.CAY62_11435	85581.CAY62_12885	0	0	0	0	0.904	0.885	0.851	0.337	0.998
rpsP	rpsN	85581.CAY62_11435	85581.CAY62_12890	0	0	0	0	0.898	0.885	0.851	0.337	0.998
rpsP	rpsK	85581.CAY62_11435	85581.CAY62_12840	0.075	0	0	0	0.904	0.885	0.851	0.337	0.998
rpsQ	rpsF	85581.CAY62_12910	85581.CAY62_00935	0	0	0	0	0.903	0.885	0.851	0.337	0.998
rpsQ	infA	85581.CAY62_12910	85581.CAY62_09120	0.154	0	0.365	0	0.904	0.885	0.678	0.186	0.998
rpsQ	rpsB	85581.CAY62_12910	85581.CAY62_11100	0.07	0	0	0	0.904	0.885	0.851	0.337	0.998
rpsQ	rpsP	85581.CAY62_12910	85581.CAY62_11435	0	0	0	0	0.889	0.885	0.85	0.337	0.998
rpsQ	rplE	85581.CAY62_12910	85581.CAY62_12895	0.505	0	0.515	0	0.904	0.885	0.332	0.337	0.998
rpsQ	rplN	85581.CAY62_12910	85581.CAY62_12905	0.526	0	0.3	0	0.904	0.885	0.527	0.337	0.998
rpsQ	rpsG	85581.CAY62_12910	85581.CAY62_12975	0.154	0	0	0	0.904	0.885	0.851	0.337	0.998
rpsQ	rpsL	85581.CAY62_12910	85581.CAY62_12980	0.154	0	0	0	0.904	0.885	0.851	0.337	0.998
rpsQ	rplB	85581.CAY62_12910	85581.CAY62_12940	0.689	0	0.165	0	0.904	0.885	0.237	0.337	0.998
rpsQ	rplV	85581.CAY62_12910	85581.CAY62_12930	0.745	0	0.469	0	0.904	0.885	0	0.337	0.998
rpsQ	rpmC	85581.CAY62_12910	85581.CAY62_12915	0.799	0	0	0	0.904	0.885	0	0.337	0.998
rpsR	rpsK	85581.CAY62_00945	85581.CAY62_12840	0	0	0	0	0.904	0.885	0.851	0.2	0.998
rpsR	rpsG	85581.CAY62_00945	85581.CAY62_12975	0.08	0	0	0	0.904	0.885	0.851	0.207	0.998
rpsR	rpsO	85581.CAY62_00945	85581.CAY62_02105	0	0	0.156	0	0.903	0.885	0.851	0.209	0.998
rpsR	rpsB	85581.CAY62_00945	85581.CAY62_11100	0.051	0	0.179	0	0.904	0.885	0.851	0.337	0.998
rpsR	rpsS	85581.CAY62_00945	85581.CAY62_12935	0	0	0	0	0.904	0.885	0.851	0.337	0.998
rpsR	rpsE	85581.CAY62_00945	85581.CAY62_12870	0	0	0.221	0	0.902	0.885	0.851	0.201	0.998
rpsR	rpsC	85581.CAY62_00945	85581.CAY62_12925	0	0	0	0	0.904	0.885	0.851	0.211	0.998
rpsS	rpsF	85581.CAY62_12935	85581.CAY62_00935	0	0	0	0	0.904	0.885	0.851	0.337	0.998
rpsS	rpsR	85581.CAY62_12935	85581.CAY62_00945	0	0	0	0	0.904	0.885	0.851	0.337	0.998
rpsS	rpsO	85581.CAY62_12935	85581.CAY62_02105	0	0	0.152	0	0.904	0.885	0.851	0.337	0.998
rpsS	infA	85581.CAY62_12935	85581.CAY62_09120	0.154	0	0.383	0	0.904	0.885	0.678	0.337	0.998
rpsS	rpsB	85581.CAY62_12935	85581.CAY62_11100	0.069	0	0.179	0	0.904	0.885	0.851	0.337	0.998
rpsS	rplF	85581.CAY62_12935	85581.CAY62_12880	0.414	0	0.521	0	0.904	0.885	0.365	0.337	0.998
rpsS	rplE	85581.CAY62_12935	85581.CAY62_12895	0.468	0	0.681	0	0.904	0.885	0.344	0.337	0.998
rpsS	rplW	85581.CAY62_12935	85581.CAY62_12945	0.721	0	0	0	0.904	0.885	0.365	0.337	0.998
sdhA	ARR48842.1	85581.CAY62_04140	85581.CAY62_04135	0.799	0	0.302	0	0.762	0.688	0.9	0.183	0.998
secY	ARR48473.1	85581.CAY62_12855	85581.CAY62_02065	0	0	0.277	0	0.098	0.885	0.967	0.337	0.998
secY	rplF	85581.CAY62_12855	85581.CAY62_12880	0.73	0	0.422	0	0.904	0.878	0	0.337	0.998
secY	rplO	85581.CAY62_12855	85581.CAY62_12860	0.743	0	0.237	0	0.904	0.876	0	0.337	0.998
secY	rplE	85581.CAY62_12855	85581.CAY62_12895	0.613	0	0.606	0	0.904	0.878	0	0.337	0.998
secY	rplN	85581.CAY62_12855	85581.CAY62_12905	0.585	0	0.594	0	0.904	0.878	0	0.337	0.998
secY	rplP	85581.CAY62_12855	85581.CAY62_12920	0.416	0	0.627	0	0.904	0.878	0	0.337	0.998
ARR48224.1	accA	85581.CAY62_00590	85581.CAY62_11020	0.103	0	0.754	0	0.599	0.26	0.964	0.189	0.997
ARR48633.1	ribH	85581.CAY62_03025	85581.CAY62_03040	0.154	0	0.774	0	0.784	0.29	0.9	0.183	0.997
ARR50334.1	rplA	85581.CAY62_12950	85581.CAY62_00445	0.154	0	0	0	0.904	0.885	0.652	0.337	0.997
ARR50334.1	rplO	85581.CAY62_12950	85581.CAY62_12860	0.385	0	0.363	0	0.904	0.885	0.415	0.337	0.997
ARR50334.1	rpmD	85581.CAY62_12950	85581.CAY62_12865	0.385	0	0	0	0.904	0.885	0.668	0.244	0.997
ARR50334.1	rplF	85581.CAY62_12950	85581.CAY62_12880	0.389	0	0.19	0	0.904	0.885	0.367	0.337	0.997
ARR50334.1	rplE	85581.CAY62_12950	85581.CAY62_12895	0.436	0	0.219	0	0.904	0.885	0.344	0.337	0.997
ARR50334.1	rplN	85581.CAY62_12950	85581.CAY62_12905	0.453	0	0	0	0.904	0.885	0.546	0.337	0.997
accA	ARR48224.1	85581.CAY62_11020	85581.CAY62_00590	0.103	0	0.754	0	0.599	0.26	0.964	0.189	0.997
atpC	atpG-2	85581.CAY62_14320	85581.CAY62_18540	0.095	0	0.699	0	0.78	0.853	0.682	0.183	0.997
atpG-2	atpC	85581.CAY62_18540	85581.CAY62_14320	0.095	0	0.699	0	0.78	0.853	0.682	0.183	0.997
fusA-2	rpsL	85581.CAY62_12970	85581.CAY62_12980	0.452	0.236	0.709	0	0.786	0.853	0.353	0.183	0.997
gcvP	glyA	85581.CAY62_16830	85581.CAY62_03010	0.245	0	0	0	0.945	0	0.9	0.389	0.997
gcvT	glyA	85581.CAY62_16820	85581.CAY62_03010	0.154	0.893	0	0	0.554	0.123	0.9	0.337	0.997
glyA	gcvT	85581.CAY62_03010	85581.CAY62_16820	0.154	0.893	0	0	0.554	0.123	0.9	0.337	0.997
glyA	gcvP	85581.CAY62_03010	85581.CAY62_16830	0.245	0	0	0	0.945	0	0.9	0.389	0.997
infA	rpsJ	85581.CAY62_09120	85581.CAY62_12960	0.154	0	0.237	0	0.902	0.885	0.655	0.208	0.997
infA	rpsN	85581.CAY62_09120	85581.CAY62_12890	0.154	0	0	0	0.895	0.885	0.655	0.337	0.997
infA	rpsL	85581.CAY62_09120	85581.CAY62_12980	0.154	0	0.197	0	0.904	0.885	0.663	0.209	0.997
nqrA	nqrC	85581.CAY62_03140	85581.CAY62_03150	0.799	0	0.774	0	0.422	0.858	0	0.337	0.997
nqrC	nqrA	85581.CAY62_03150	85581.CAY62_03140	0.799	0	0.774	0	0.422	0.858	0	0.337	0.997
pgk	tpiA	85581.CAY62_11840	85581.CAY62_13335	0.154	0.9	0.503	0	0.904	0.279	0	0.337	0.997
ribH	ARR48633.1	85581.CAY62_03040	85581.CAY62_03025	0.154	0	0.774	0	0.784	0.29	0.9	0.183	0.997
rplA	rplX	85581.CAY62_00445	85581.CAY62_12900	0.154	0	0	0	0.904	0.885	0.611	0.337	0.997
rplA	rplL	85581.CAY62_00445	85581.CAY62_00455	0.424	0	0.575	0	0.904	0.882	0	0.337	0.997
rplA	rpsH	85581.CAY62_00445	85581.CAY62_12885	0.154	0	0.425	0	0.904	0.885	0.34	0.337	0.997
rplA	rplC	85581.CAY62_00445	85581.CAY62_12955	0.154	0	0.192	0	0.904	0.885	0.584	0.337	0.997
rplA	ARR50334.1	85581.CAY62_00445	85581.CAY62_12950	0.154	0	0	0	0.904	0.885	0.652	0.337	0.997
rplA	rpmD	85581.CAY62_00445	85581.CAY62_12865	0.102	0	0	0	0.904	0.885	0.704	0.337	0.997
rplA	rpmC	85581.CAY62_00445	85581.CAY62_12915	0.154	0	0	0	0.904	0.885	0.708	0.337	0.997
rplA	rplW	85581.CAY62_00445	85581.CAY62_12945	0.154	0	0	0	0.904	0.885	0.708	0.337	0.997
rplA	rpsE	85581.CAY62_00445	85581.CAY62_12870	0.154	0	0.451	0	0.904	0.885	0.341	0.337	0.997
rplB	rplM	85581.CAY62_12940	85581.CAY62_12405	0.154	0	0.151	0	0.904	0.885	0.586	0.337	0.997
rplB	rpsM	85581.CAY62_12940	85581.CAY62_12845	0.303	0	0.646	0	0.904	0.885	0	0.337	0.997
rplB	rpmD	85581.CAY62_12940	85581.CAY62_12865	0.396	0	0	0	0.904	0.885	0.519	0.337	0.997
rplB	rpsN	85581.CAY62_12940	85581.CAY62_12890	0.441	0	0	0	0.904	0.885	0.531	0.337	0.997
rplB	rplX	85581.CAY62_12940	85581.CAY62_12900	0.463	0	0	0	0.904	0.885	0.363	0.337	0.997
rplB	rpsG	85581.CAY62_12940	85581.CAY62_12975	0.154	0	0.53	0	0.904	0.885	0.431	0.337	0.997
rplC	rplA	85581.CAY62_12955	85581.CAY62_00445	0.154	0	0.192	0	0.904	0.885	0.584	0.337	0.997
rplC	rpsD	85581.CAY62_12955	85581.CAY62_12835	0.281	0	0.329	0	0.904	0.885	0.454	0.337	0.997
rplC	rpsK	85581.CAY62_12955	85581.CAY62_12840	0.289	0	0.39	0	0.904	0.885	0.359	0.337	0.997
rplC	rpsE	85581.CAY62_12955	85581.CAY62_12870	0.376	0	0.429	0	0.904	0.885	0.349	0.337	0.997
rplC	rpsQ	85581.CAY62_12955	85581.CAY62_12910	0.633	0	0.331	0	0.904	0.885	0	0.337	0.997
rplE	rpsB	85581.CAY62_12895	85581.CAY62_11100	0.064	0	0.51	0	0.904	0.885	0.332	0.337	0.997
rplE	rpsG	85581.CAY62_12895	85581.CAY62_12975	0.154	0	0.55	0	0.904	0.885	0.332	0.337	0.997
rplE	ARR50334.1	85581.CAY62_12895	85581.CAY62_12950	0.436	0	0.219	0	0.904	0.885	0.344	0.337	0.997
rplF	rplJ	85581.CAY62_12880	85581.CAY62_00450	0.154	0	0	0	0.904	0.885	0.706	0.337	0.997
rplF	rpsB	85581.CAY62_12880	85581.CAY62_11100	0.056	0	0.481	0	0.904	0.885	0.381	0.337	0.997
rplF	rplQ	85581.CAY62_12880	85581.CAY62_12825	0.367	0	0.465	0	0.904	0.885	0	0.337	0.997
rplF	rpsK	85581.CAY62_12880	85581.CAY62_12840	0.447	0	0.313	0	0.904	0.885	0.383	0.337	0.997
rplF	rpsL	85581.CAY62_12880	85581.CAY62_12980	0.154	0	0.468	0	0.904	0.885	0.404	0.337	0.997
rplF	rpsN	85581.CAY62_12880	85581.CAY62_12890	0.688	0	0	0	0.904	0.885	0	0.337	0.997
rplF	rpsQ	85581.CAY62_12880	85581.CAY62_12910	0.441	0	0.394	0	0.904	0.885	0	0.337	0.997
rplF	rpsJ	85581.CAY62_12880	85581.CAY62_12960	0.374	0	0.213	0	0.904	0.885	0.406	0.337	0.997
rplF	ARR50334.1	85581.CAY62_12880	85581.CAY62_12950	0.389	0	0.19	0	0.904	0.885	0.367	0.337	0.997
rplI	rpsF	85581.CAY62_00950	85581.CAY62_00935	0.657	0	0.186	0	0.904	0.885	0	0.337	0.997
rplI	rpsR	85581.CAY62_00950	85581.CAY62_00945	0.686	0	0.239	0	0.904	0.885	0	0.337	0.997
rplJ	rplP	85581.CAY62_00450	85581.CAY62_12920	0.154	0	0	0	0.904	0.885	0.655	0.337	0.997
rplJ	rplL	85581.CAY62_00450	85581.CAY62_00455	0.64	0	0.243	0	0.904	0.885	0	0.337	0.997
rplJ	rplM	85581.CAY62_00450	85581.CAY62_12405	0	0	0	0	0.904	0.885	0.715	0.337	0.997
rplJ	rplF	85581.CAY62_00450	85581.CAY62_12880	0.154	0	0	0	0.904	0.885	0.706	0.337	0.997
rplJ	rpmC	85581.CAY62_00450	85581.CAY62_12915	0.154	0	0	0	0.904	0.885	0.725	0.337	0.997
rplJ	rplO	85581.CAY62_00450	85581.CAY62_12860	0.154	0	0	0	0.904	0.885	0.725	0.337	0.997
rplL	rplA	85581.CAY62_00455	85581.CAY62_00445	0.424	0	0.575	0	0.904	0.882	0	0.337	0.997
rplL	rplJ	85581.CAY62_00455	85581.CAY62_00450	0.64	0	0.243	0	0.904	0.885	0	0.337	0.997
rplM	rplJ	85581.CAY62_12405	85581.CAY62_00450	0	0	0	0	0.904	0.885	0.715	0.337	0.997
rplM	rplB	85581.CAY62_12405	85581.CAY62_12940	0.154	0	0.151	0	0.904	0.885	0.586	0.337	0.997
rplM	rpsD	85581.CAY62_12405	85581.CAY62_12835	0.154	0	0.33	0	0.904	0.885	0.463	0.337	0.997
rplM	rplN	85581.CAY62_12405	85581.CAY62_12905	0.154	0	0.202	0	0.904	0.885	0.613	0.337	0.997
rplM	rpmD	85581.CAY62_12405	85581.CAY62_12865	0.154	0	0	0	0.904	0.885	0.725	0.337	0.997
rplM	rpmC	85581.CAY62_12405	85581.CAY62_12915	0.154	0	0	0	0.904	0.885	0.613	0.336	0.997
rplM	rplW	85581.CAY62_12405	85581.CAY62_12945	0.154	0	0	0	0.904	0.885	0.715	0.337	0.997
rplN	rpsB	85581.CAY62_12905	85581.CAY62_11100	0.069	0	0.482	0	0.904	0.885	0.498	0.337	0.997
rplN	rplM	85581.CAY62_12905	85581.CAY62_12405	0.154	0	0.202	0	0.904	0.885	0.613	0.337	0.997
rplN	ARR50334.1	85581.CAY62_12905	85581.CAY62_12950	0.453	0	0	0	0.904	0.885	0.546	0.337	0.997
rplN	rplW	85581.CAY62_12905	85581.CAY62_12945	0.453	0	0	0	0.904	0.885	0.377	0.337	0.997
rplO	rplJ	85581.CAY62_12860	85581.CAY62_00450	0.154	0	0	0	0.904	0.885	0.725	0.337	0.997
rplO	rplQ	85581.CAY62_12860	85581.CAY62_12825	0.371	0	0.583	0	0.904	0.885	0	0.337	0.997
rplO	rpsK	85581.CAY62_12860	85581.CAY62_12840	0.453	0	0.251	0	0.904	0.885	0.364	0.337	0.997
rplO	rpsM	85581.CAY62_12860	85581.CAY62_12845	0.471	0	0.468	0	0.904	0.885	0	0.337	0.997
rplO	rpsS	85581.CAY62_12860	85581.CAY62_12935	0.408	0	0.163	0	0.904	0.885	0.348	0.337	0.997
rplO	ARR50334.1	85581.CAY62_12860	85581.CAY62_12950	0.385	0	0.363	0	0.904	0.885	0.415	0.337	0.997
rplO	rpsC	85581.CAY62_12860	85581.CAY62_12925	0.432	0	0.188	0	0.904	0.885	0.349	0.337	0.997
rplO	rpsN	85581.CAY62_12860	85581.CAY62_12890	0.677	0	0	0	0.904	0.885	0	0.337	0.997
rplP	rplJ	85581.CAY62_12920	85581.CAY62_00450	0.154	0	0	0	0.904	0.885	0.655	0.337	0.997
rplP	rpsA	85581.CAY62_12920	85581.CAY62_08215	0.056	0	0	0	0.877	0.855	0.851	0.209	0.997
rplP	rpmD	85581.CAY62_12920	85581.CAY62_12865	0.436	0	0	0	0.904	0.885	0.604	0.208	0.997
rplP	rplX	85581.CAY62_12920	85581.CAY62_12900	0.519	0	0	0	0.904	0.885	0.368	0.337	0.997
rplQ	rpmA	85581.CAY62_12825	85581.CAY62_01195	0	0	0.657	0	0.902	0.885	0	0.337	0.997
rplQ	rpsD	85581.CAY62_12825	85581.CAY62_12835	0.656	0	0.255	0	0.904	0.885	0	0.337	0.997
rplQ	rplO	85581.CAY62_12825	85581.CAY62_12860	0.371	0	0.583	0	0.904	0.885	0	0.337	0.997
rplQ	rplF	85581.CAY62_12825	85581.CAY62_12880	0.367	0	0.465	0	0.904	0.885	0	0.337	0.997
rplQ	rpsM	85581.CAY62_12825	85581.CAY62_12845	0.559	0	0.266	0	0.904	0.885	0	0.337	0.997
rplR	rpsM	85581.CAY62_12875	85581.CAY62_12845	0.465	0	0.456	0	0.904	0.885	0	0.337	0.997
rplR	rpsJ	85581.CAY62_12875	85581.CAY62_12960	0.374	0	0.23	0	0.904	0.885	0.384	0.337	0.997
rplR	rpsS	85581.CAY62_12875	85581.CAY62_12935	0.414	0	0.421	0	0.904	0.885	0.343	0.337	0.997
rplR	rpsN	85581.CAY62_12875	85581.CAY62_12890	0.688	0	0	0	0.904	0.885	0	0.337	0.997
rplR	rpsQ	85581.CAY62_12875	85581.CAY62_12910	0.441	0	0.529	0	0.904	0.885	0	0.337	0.997
rplR	rpsC	85581.CAY62_12875	85581.CAY62_12925	0.437	0	0.365	0	0.904	0.885	0.37	0.337	0.997
rplS	rplU	85581.CAY62_11420	85581.CAY62_01190	0.102	0	0.647	0	0.904	0.885	0	0.337	0.997
rplS	rpmA	85581.CAY62_11420	85581.CAY62_01195	0.099	0	0.624	0	0.904	0.885	0	0.337	0.997
rplU	rplS	85581.CAY62_01190	85581.CAY62_11420	0.102	0	0.647	0	0.904	0.885	0	0.337	0.997
rplV	rpsK	85581.CAY62_12930	85581.CAY62_12840	0.305	0	0.457	0	0.904	0.885	0.383	0.337	0.997
rplW	rplA	85581.CAY62_12945	85581.CAY62_00445	0.154	0	0	0	0.904	0.885	0.708	0.337	0.997
rplW	rplM	85581.CAY62_12945	85581.CAY62_12405	0.154	0	0	0	0.904	0.885	0.715	0.337	0.997
rplW	rpsH	85581.CAY62_12945	85581.CAY62_12885	0.393	0	0.244	0	0.904	0.885	0.373	0.337	0.997
rplW	rplN	85581.CAY62_12945	85581.CAY62_12905	0.453	0	0	0	0.904	0.885	0.377	0.337	0.997
rplW	rpsQ	85581.CAY62_12945	85581.CAY62_12910	0.656	0	0.26	0	0.904	0.885	0	0.337	0.997
rplX	rplA	85581.CAY62_12900	85581.CAY62_00445	0.154	0	0	0	0.904	0.885	0.611	0.337	0.997
rplX	rpsK	85581.CAY62_12900	85581.CAY62_12840	0.389	0	0.159	0	0.904	0.885	0.36	0.337	0.997
rplX	secY	85581.CAY62_12900	85581.CAY62_12855	0.594	0	0.218	0	0.904	0.885	0	0.307	0.997
rplX	rpsN	85581.CAY62_12900	85581.CAY62_12890	0.745	0	0	0	0.904	0.885	0.084	0.337	0.997
rplX	rpsS	85581.CAY62_12900	85581.CAY62_12935	0.481	0	0	0	0.904	0.885	0.344	0.337	0.997
rplX	rplP	85581.CAY62_12900	85581.CAY62_12920	0.519	0	0	0	0.904	0.885	0.368	0.337	0.997
rplX	rplB	85581.CAY62_12900	85581.CAY62_12940	0.463	0	0	0	0.904	0.885	0.363	0.337	0.997
rplX	rpsC	85581.CAY62_12900	85581.CAY62_12925	0.513	0	0	0	0.904	0.885	0.347	0.337	0.997
rpmA	rplQ	85581.CAY62_01195	85581.CAY62_12825	0	0	0.657	0	0.902	0.885	0	0.337	0.997
rpmA	rplS	85581.CAY62_01195	85581.CAY62_11420	0.099	0	0.624	0	0.904	0.885	0	0.337	0.997
rpmC	rplA	85581.CAY62_12915	85581.CAY62_00445	0.154	0	0	0	0.904	0.885	0.708	0.337	0.997
rpmC	rplJ	85581.CAY62_12915	85581.CAY62_00450	0.154	0	0	0	0.904	0.885	0.725	0.337	0.997
rpmC	rplM	85581.CAY62_12915	85581.CAY62_12405	0.154	0	0	0	0.904	0.885	0.613	0.336	0.997
rpmC	rpsS	85581.CAY62_12915	85581.CAY62_12935	0.724	0	0	0	0.904	0.885	0	0.337	0.997
rpmD	rplA	85581.CAY62_12865	85581.CAY62_00445	0.102	0	0	0	0.904	0.885	0.704	0.337	0.997
rpmD	rplM	85581.CAY62_12865	85581.CAY62_12405	0.154	0	0	0	0.904	0.885	0.725	0.337	0.997
rpmD	rpsD	85581.CAY62_12865	85581.CAY62_12835	0.416	0	0	0	0.904	0.885	0.467	0.337	0.997
rpmD	secY	85581.CAY62_12865	85581.CAY62_12855	0.743	0	0	0	0.904	0.877	0	0.25	0.997
rpmD	rpsN	85581.CAY62_12865	85581.CAY62_12890	0.677	0	0	0	0.904	0.885	0	0.337	0.997
rpmD	ARR50334.1	85581.CAY62_12865	85581.CAY62_12950	0.385	0	0	0	0.904	0.885	0.668	0.244	0.997
rpmD	rplB	85581.CAY62_12865	85581.CAY62_12940	0.396	0	0	0	0.904	0.885	0.519	0.337	0.997
rpmD	rplP	85581.CAY62_12865	85581.CAY62_12920	0.436	0	0	0	0.904	0.885	0.604	0.208	0.997
rpoA	rpsB	85581.CAY62_12830	85581.CAY62_11100	0.154	0	0.54	0	0.904	0.874	0.355	0.337	0.997
rpoA	rpsE	85581.CAY62_12830	85581.CAY62_12870	0.398	0	0.488	0	0.904	0.876	0	0.337	0.997
rpoA	rpsC	85581.CAY62_12830	85581.CAY62_12925	0.292	0	0.676	0	0.904	0.882	0	0.337	0.997
rpoA	rpsH	85581.CAY62_12830	85581.CAY62_12885	0.389	0	0.578	0	0.904	0.873	0	0.337	0.997
rpsA	rpsQ	85581.CAY62_08215	85581.CAY62_12910	0.05	0	0	0	0.775	0.885	0.851	0.337	0.997
rpsA	rpsS	85581.CAY62_08215	85581.CAY62_12935	0.06	0	0	0	0.877	0.849	0.851	0.211	0.997
rpsA	rplP	85581.CAY62_08215	85581.CAY62_12920	0.056	0	0	0	0.877	0.855	0.851	0.209	0.997
rpsB	rplE	85581.CAY62_11100	85581.CAY62_12895	0.064	0	0.51	0	0.904	0.885	0.332	0.337	0.997
rpsB	rplN	85581.CAY62_11100	85581.CAY62_12905	0.069	0	0.482	0	0.904	0.885	0.498	0.337	0.997
rpsB	rpoA	85581.CAY62_11100	85581.CAY62_12830	0.154	0	0.54	0	0.904	0.874	0.355	0.337	0.997
rpsB	rplF	85581.CAY62_11100	85581.CAY62_12880	0.056	0	0.481	0	0.904	0.885	0.381	0.337	0.997
rpsC	rpoA	85581.CAY62_12925	85581.CAY62_12830	0.292	0	0.676	0	0.904	0.882	0	0.337	0.997
rpsC	secY	85581.CAY62_12925	85581.CAY62_12855	0.412	0	0.582	0	0.904	0.865	0	0.337	0.997
rpsC	rplO	85581.CAY62_12925	85581.CAY62_12860	0.432	0	0.188	0	0.904	0.885	0.349	0.337	0.997
rpsC	rplR	85581.CAY62_12925	85581.CAY62_12875	0.437	0	0.365	0	0.904	0.885	0.37	0.337	0.997
rpsC	rplX	85581.CAY62_12925	85581.CAY62_12900	0.513	0	0	0	0.904	0.885	0.347	0.337	0.997
rpsD	rplM	85581.CAY62_12835	85581.CAY62_12405	0.154	0	0.33	0	0.904	0.885	0.463	0.337	0.997
rpsD	rplQ	85581.CAY62_12835	85581.CAY62_12825	0.656	0	0.255	0	0.904	0.885	0	0.337	0.997
rpsD	rplC	85581.CAY62_12835	85581.CAY62_12955	0.281	0	0.329	0	0.904	0.885	0.454	0.337	0.997
rpsD	rpmD	85581.CAY62_12835	85581.CAY62_12865	0.416	0	0	0	0.904	0.885	0.467	0.337	0.997
rpsE	rplA	85581.CAY62_12870	85581.CAY62_00445	0.154	0	0.451	0	0.904	0.885	0.341	0.337	0.997
rpsE	rpoA	85581.CAY62_12870	85581.CAY62_12830	0.398	0	0.488	0	0.904	0.876	0	0.337	0.997
rpsE	rplC	85581.CAY62_12870	85581.CAY62_12955	0.376	0	0.429	0	0.904	0.885	0.349	0.337	0.997
rpsF	rplI	85581.CAY62_00935	85581.CAY62_00950	0.657	0	0.186	0	0.904	0.885	0	0.337	0.997
rpsG	rplE	85581.CAY62_12975	85581.CAY62_12895	0.154	0	0.55	0	0.904	0.885	0.332	0.337	0.997
rpsG	rplB	85581.CAY62_12975	85581.CAY62_12940	0.154	0	0.53	0	0.904	0.885	0.431	0.337	0.997
rpsH	rplA	85581.CAY62_12885	85581.CAY62_00445	0.154	0	0.425	0	0.904	0.885	0.34	0.337	0.997
rpsH	rpoA	85581.CAY62_12885	85581.CAY62_12830	0.389	0	0.578	0	0.904	0.873	0	0.337	0.997
rpsH	rplW	85581.CAY62_12885	85581.CAY62_12945	0.393	0	0.244	0	0.904	0.885	0.373	0.337	0.997
rpsJ	infA	85581.CAY62_12960	85581.CAY62_09120	0.154	0	0.237	0	0.902	0.885	0.655	0.208	0.997
rpsJ	rplR	85581.CAY62_12960	85581.CAY62_12875	0.374	0	0.23	0	0.904	0.885	0.384	0.337	0.997
rpsJ	rplF	85581.CAY62_12960	85581.CAY62_12880	0.374	0	0.213	0	0.904	0.885	0.406	0.337	0.997
rpsK	rplX	85581.CAY62_12840	85581.CAY62_12900	0.389	0	0.159	0	0.904	0.885	0.36	0.337	0.997
rpsK	rplC	85581.CAY62_12840	85581.CAY62_12955	0.289	0	0.39	0	0.904	0.885	0.359	0.337	0.997
rpsK	rplO	85581.CAY62_12840	85581.CAY62_12860	0.453	0	0.251	0	0.904	0.885	0.364	0.337	0.997
rpsK	rplF	85581.CAY62_12840	85581.CAY62_12880	0.447	0	0.313	0	0.904	0.885	0.383	0.337	0.997
rpsK	rplV	85581.CAY62_12840	85581.CAY62_12930	0.305	0	0.457	0	0.904	0.885	0.383	0.337	0.997
rpsL	infA	85581.CAY62_12980	85581.CAY62_09120	0.154	0	0.197	0	0.904	0.885	0.663	0.209	0.997
rpsL	rplF	85581.CAY62_12980	85581.CAY62_12880	0.154	0	0.468	0	0.904	0.885	0.404	0.337	0.997
rpsL	fusA-2	85581.CAY62_12980	85581.CAY62_12970	0.452	0.236	0.709	0	0.786	0.853	0.353	0.183	0.997
rpsM	rplQ	85581.CAY62_12845	85581.CAY62_12825	0.559	0	0.266	0	0.904	0.885	0	0.337	0.997
rpsM	rplR	85581.CAY62_12845	85581.CAY62_12875	0.465	0	0.456	0	0.904	0.885	0	0.337	0.997
rpsM	rplB	85581.CAY62_12845	85581.CAY62_12940	0.303	0	0.646	0	0.904	0.885	0	0.337	0.997
rpsM	rplO	85581.CAY62_12845	85581.CAY62_12860	0.471	0	0.468	0	0.904	0.885	0	0.337	0.997
rpsM	secY	85581.CAY62_12845	85581.CAY62_12855	0.498	0	0.529	0	0.904	0.865	0	0.337	0.997
rpsN	infA	85581.CAY62_12890	85581.CAY62_09120	0.154	0	0	0	0.895	0.885	0.655	0.337	0.997
rpsN	rplO	85581.CAY62_12890	85581.CAY62_12860	0.677	0	0	0	0.904	0.885	0	0.337	0.997
rpsN	rpmD	85581.CAY62_12890	85581.CAY62_12865	0.677	0	0	0	0.904	0.885	0	0.337	0.997
rpsN	rplR	85581.CAY62_12890	85581.CAY62_12875	0.688	0	0	0	0.904	0.885	0	0.337	0.997
rpsN	rplF	85581.CAY62_12890	85581.CAY62_12880	0.688	0	0	0	0.904	0.885	0	0.337	0.997
rpsN	rplB	85581.CAY62_12890	85581.CAY62_12940	0.441	0	0	0	0.904	0.885	0.531	0.337	0.997
rpsN	rplX	85581.CAY62_12890	85581.CAY62_12900	0.745	0	0	0	0.904	0.885	0.084	0.337	0.997
rpsP	rpsR	85581.CAY62_11435	85581.CAY62_00945	0	0	0.367	0	0.904	0.885	0.548	0.21	0.997
rpsQ	rpsA	85581.CAY62_12910	85581.CAY62_08215	0.05	0	0	0	0.775	0.885	0.851	0.337	0.997
rpsQ	rplR	85581.CAY62_12910	85581.CAY62_12875	0.441	0	0.529	0	0.904	0.885	0	0.337	0.997
rpsQ	rplF	85581.CAY62_12910	85581.CAY62_12880	0.441	0	0.394	0	0.904	0.885	0	0.337	0.997
rpsQ	rplC	85581.CAY62_12910	85581.CAY62_12955	0.633	0	0.331	0	0.904	0.885	0	0.337	0.997
rpsQ	rplW	85581.CAY62_12910	85581.CAY62_12945	0.656	0	0.26	0	0.904	0.885	0	0.337	0.997
rpsR	rplI	85581.CAY62_00945	85581.CAY62_00950	0.686	0	0.239	0	0.904	0.885	0	0.337	0.997
rpsR	rpsP	85581.CAY62_00945	85581.CAY62_11435	0	0	0.367	0	0.904	0.885	0.548	0.21	0.997
rpsS	rpsA	85581.CAY62_12935	85581.CAY62_08215	0.06	0	0	0	0.877	0.849	0.851	0.211	0.997
rpsS	rplO	85581.CAY62_12935	85581.CAY62_12860	0.408	0	0.163	0	0.904	0.885	0.348	0.337	0.997
rpsS	rplR	85581.CAY62_12935	85581.CAY62_12875	0.414	0	0.421	0	0.904	0.885	0.343	0.337	0.997
rpsS	rplX	85581.CAY62_12935	85581.CAY62_12900	0.481	0	0	0	0.904	0.885	0.344	0.337	0.997
rpsS	rpmC	85581.CAY62_12935	85581.CAY62_12915	0.724	0	0	0	0.904	0.885	0	0.337	0.997
secY	rpsM	85581.CAY62_12855	85581.CAY62_12845	0.498	0	0.529	0	0.904	0.865	0	0.337	0.997
secY	rpmD	85581.CAY62_12855	85581.CAY62_12865	0.743	0	0	0	0.904	0.877	0	0.25	0.997
secY	rpsC	85581.CAY62_12855	85581.CAY62_12925	0.412	0	0.582	0	0.904	0.865	0	0.337	0.997
secY	rplX	85581.CAY62_12855	85581.CAY62_12900	0.594	0	0.218	0	0.904	0.885	0	0.307	0.997
tpiA	pgk	85581.CAY62_13335	85581.CAY62_11840	0.154	0.9	0.503	0	0.904	0.279	0	0.337	0.997
ARR48245.1	ARR48842.1	85581.CAY62_00700	85581.CAY62_04135	0.095	0	0	0	0.752	0.851	0.9	0.183	0.996
ARR48632.1	ARR49020.1	85581.CAY62_03020	85581.CAY62_05145	0.233	0.216	0.771	0	0.964	0	0	0.372	0.996
ARR48842.1	ARR48245.1	85581.CAY62_04135	85581.CAY62_00700	0.095	0	0	0	0.752	0.851	0.9	0.183	0.996
ARR49020.1	ARR48632.1	85581.CAY62_05145	85581.CAY62_03020	0.233	0.216	0.771	0	0.964	0	0	0.372	0.996
ARR49020.1	ribH	85581.CAY62_05145	85581.CAY62_03040	0.095	0	0.77	0	0.784	0.29	0.9	0.183	0.996
ARR50334.1	rpsI	85581.CAY62_12950	85581.CAY62_12400	0.154	0	0.17	0	0.904	0.885	0.385	0.337	0.996
ARR50334.1	rplM	85581.CAY62_12950	85581.CAY62_12405	0.154	0	0.326	0	0.904	0.885	0.367	0.337	0.996
ARR50596.1	purM	85581.CAY62_14470	85581.CAY62_10810	0.154	0	0.493	0	0.903	0	0.9	0.337	0.996
atpA	atpG-2	85581.CAY62_14305	85581.CAY62_18540	0.075	0.177	0.774	0	0.664	0.847	0.682	0.124	0.996
atpG-2	atpA	85581.CAY62_18540	85581.CAY62_14305	0.075	0.177	0.774	0	0.664	0.847	0.682	0.124	0.996
infA	rpsD	85581.CAY62_09120	85581.CAY62_12835	0.154	0	0.445	0	0.792	0.885	0.655	0.337	0.996
infA	rpsK	85581.CAY62_09120	85581.CAY62_12840	0.154	0	0.459	0	0.904	0.885	0.264	0.337	0.996
map	rplJ	85581.CAY62_11105	85581.CAY62_00450	0.102	0	0	0	0.834	0.854	0.828	0.188	0.996
ndk	rpsJ	85581.CAY62_02880	85581.CAY62_12960	0	0	0	0	0.843	0.854	0.851	0	0.996
nqrC	nqrD	85581.CAY62_03150	85581.CAY62_03155	0.799	0	0.771	0	0.426	0.851	0	0.337	0.996
nqrD	nqrC	85581.CAY62_03155	85581.CAY62_03150	0.799	0	0.771	0	0.426	0.851	0	0.337	0.996
nusA	rpoB	85581.CAY62_02085	85581.CAY62_00460	0.154	0	0.575	0	0.878	0.885	0.304	0.208	0.996
nusA	rpoA	85581.CAY62_02085	85581.CAY62_12830	0.097	0	0.712	0	0.801	0.885	0.304	0.337	0.996
purM	ARR50596.1	85581.CAY62_10810	85581.CAY62_14470	0.154	0	0.493	0	0.903	0	0.9	0.337	0.996
ribH	ARR49020.1	85581.CAY62_03040	85581.CAY62_05145	0.095	0	0.77	0	0.784	0.29	0.9	0.183	0.996
rplA	rpsN	85581.CAY62_00445	85581.CAY62_12890	0.154	0	0	0	0.904	0.885	0.59	0.335	0.996
rplA	rplM	85581.CAY62_00445	85581.CAY62_12405	0.056	0	0.355	0	0.904	0.885	0.388	0.337	0.996
rplA	rplS	85581.CAY62_00445	85581.CAY62_11420	0.097	0	0.496	0	0.904	0.885	0	0.337	0.996
rplA	rpsG	85581.CAY62_00445	85581.CAY62_12975	0.154	0	0.332	0	0.904	0.885	0.348	0.337	0.996
rplA	rplO	85581.CAY62_00445	85581.CAY62_12860	0.154	0	0.287	0	0.904	0.885	0.367	0.337	0.996
rplA	rplF	85581.CAY62_00445	85581.CAY62_12880	0.154	0	0.316	0	0.904	0.885	0.388	0.337	0.996
rplA	rpsD	85581.CAY62_00445	85581.CAY62_12835	0.097	0	0.205	0	0.904	0.885	0.424	0.337	0.996
rplB	rpsB	85581.CAY62_12940	85581.CAY62_11100	0.067	0	0.247	0	0.904	0.885	0.414	0.337	0.996
rplC	rplQ	85581.CAY62_12955	85581.CAY62_12825	0.269	0	0.486	0	0.904	0.885	0	0.337	0.996
rplC	rpsM	85581.CAY62_12955	85581.CAY62_12845	0.295	0	0.421	0	0.904	0.885	0	0.337	0.996
rplC	rpsG	85581.CAY62_12955	85581.CAY62_12975	0.154	0	0.309	0	0.904	0.885	0.359	0.337	0.996
rplC	rpsL	85581.CAY62_12955	85581.CAY62_12980	0.154	0	0.319	0	0.904	0.885	0.383	0.337	0.996
rplE	rpsI	85581.CAY62_12895	85581.CAY62_12400	0.154	0	0.519	0	0.904	0.885	0	0.337	0.996
rplE	rplW	85581.CAY62_12895	85581.CAY62_12945	0.436	0	0	0	0.904	0.885	0.377	0.337	0.996
rplF	rplA	85581.CAY62_12880	85581.CAY62_00445	0.154	0	0.316	0	0.904	0.885	0.388	0.337	0.996
rplF	rpsG	85581.CAY62_12880	85581.CAY62_12975	0.154	0	0.244	0	0.904	0.885	0.383	0.337	0.996
rplJ	rplK	85581.CAY62_00450	85581.CAY62_00440	0.498	0	0.177	0	0.904	0.885	0	0.337	0.996
rplJ	rpsG	85581.CAY62_00450	85581.CAY62_12975	0.154	0	0.221	0	0.904	0.885	0.46	0.337	0.996
rplJ	rpsB	85581.CAY62_00450	85581.CAY62_11100	0.051	0	0.247	0	0.904	0.885	0.456	0.337	0.996
rplJ	rpsC	85581.CAY62_00450	85581.CAY62_12925	0.154	0	0	0	0.904	0.885	0.47	0.337	0.996
rplJ	map	85581.CAY62_00450	85581.CAY62_11105	0.102	0	0	0	0.834	0.854	0.828	0.188	0.996
rplK	rplJ	85581.CAY62_00440	85581.CAY62_00450	0.498	0	0.177	0	0.904	0.885	0	0.337	0.996
rplK	rpoB	85581.CAY62_00440	85581.CAY62_00460	0.324	0	0.491	0	0.903	0.88	0	0.337	0.996
rplM	rplA	85581.CAY62_12405	85581.CAY62_00445	0.056	0	0.355	0	0.904	0.885	0.388	0.337	0.996
rplM	rpsB	85581.CAY62_12405	85581.CAY62_11100	0.154	0	0.263	0	0.904	0.885	0.381	0.337	0.996
rplM	rpsE	85581.CAY62_12405	85581.CAY62_12870	0.154	0	0.351	0	0.904	0.885	0.373	0.337	0.996
rplM	ARR50334.1	85581.CAY62_12405	85581.CAY62_12950	0.154	0	0.326	0	0.904	0.885	0.367	0.337	0.996
rplM	rpsH	85581.CAY62_12405	85581.CAY62_12885	0.154	0	0.317	0	0.904	0.885	0.373	0.337	0.996
rplM	rpsL	85581.CAY62_12405	85581.CAY62_12980	0.154	0	0.262	0	0.904	0.885	0.404	0.337	0.996
rplM	rpsG	85581.CAY62_12405	85581.CAY62_12975	0.154	0	0.291	0	0.904	0.885	0.383	0.337	0.996
rplM	rpsK	85581.CAY62_12405	85581.CAY62_12840	0.154	0	0.224	0	0.904	0.885	0.383	0.337	0.996
rplM	rplX	85581.CAY62_12405	85581.CAY62_12900	0.154	0	0.172	0	0.904	0.885	0.402	0.337	0.996
rplN	rpsO	85581.CAY62_12905	85581.CAY62_02105	0	0	0.18	0	0.904	0.885	0.565	0.337	0.996
rplN	rpsI	85581.CAY62_12905	85581.CAY62_12400	0.154	0	0.479	0	0.904	0.885	0	0.337	0.996
rplN	rplQ	85581.CAY62_12905	85581.CAY62_12825	0.328	0	0.418	0	0.904	0.885	0	0.337	0.996
rplO	rplA	85581.CAY62_12860	85581.CAY62_00445	0.154	0	0.287	0	0.904	0.885	0.367	0.337	0.996
rplO	rpsJ	85581.CAY62_12860	85581.CAY62_12960	0.371	0	0	0	0.904	0.885	0.385	0.337	0.996
rplO	rpsQ	85581.CAY62_12860	85581.CAY62_12910	0.436	0	0.373	0	0.904	0.885	0	0.337	0.996
rplO	rpsG	85581.CAY62_12860	85581.CAY62_12975	0.154	0	0.218	0	0.904	0.885	0.364	0.337	0.996
rplO	rpsL	85581.CAY62_12860	85581.CAY62_12980	0.154	0	0.174	0	0.904	0.885	0.383	0.337	0.996
rplP	rpsI	85581.CAY62_12920	85581.CAY62_12400	0.154	0	0.15	0	0.904	0.885	0.404	0.337	0.996
rplP	rplQ	85581.CAY62_12920	85581.CAY62_12825	0.283	0	0.467	0	0.904	0.885	0.074	0.337	0.996
rplQ	rpsO	85581.CAY62_12825	85581.CAY62_02105	0.07	0	0.585	0	0.902	0.885	0	0.337	0.996
rplQ	rplN	85581.CAY62_12825	85581.CAY62_12905	0.328	0	0.418	0	0.904	0.885	0	0.337	0.996
rplQ	rpsE	85581.CAY62_12825	85581.CAY62_12870	0.371	0	0.291	0	0.904	0.885	0	0.337	0.996
rplQ	rpsH	85581.CAY62_12825	85581.CAY62_12885	0.363	0	0.289	0	0.904	0.885	0	0.337	0.996
rplQ	rplC	85581.CAY62_12825	85581.CAY62_12955	0.269	0	0.486	0	0.904	0.885	0	0.337	0.996
rplQ	rplP	85581.CAY62_12825	85581.CAY62_12920	0.283	0	0.467	0	0.904	0.885	0.074	0.337	0.996
rplQ	rpsK	85581.CAY62_12825	85581.CAY62_12840	0.587	0	0	0	0.904	0.885	0	0.337	0.996
rplR	rpsG	85581.CAY62_12875	85581.CAY62_12975	0.154	0	0.198	0	0.904	0.885	0.359	0.337	0.996
rplR	rpsL	85581.CAY62_12875	85581.CAY62_12980	0.154	0	0.211	0	0.904	0.885	0.383	0.337	0.996
rplS	rplA	85581.CAY62_11420	85581.CAY62_00445	0.097	0	0.496	0	0.904	0.885	0	0.337	0.996
rplV	rpsM	85581.CAY62_12930	85581.CAY62_12845	0.311	0	0.463	0	0.904	0.885	0	0.337	0.996
rplV	secY	85581.CAY62_12930	85581.CAY62_12855	0.398	0	0.427	0	0.904	0.884	0	0.337	0.996
rplV	rpsG	85581.CAY62_12930	85581.CAY62_12975	0.154	0	0.292	0	0.904	0.885	0.383	0.337	0.996
rplW	rpsD	85581.CAY62_12945	85581.CAY62_12835	0.283	0	0	0	0.904	0.885	0.393	0.337	0.996
rplW	rpsK	85581.CAY62_12945	85581.CAY62_12840	0.293	0	0	0	0.904	0.885	0.383	0.337	0.996
rplW	rpsE	85581.CAY62_12945	85581.CAY62_12870	0.385	0	0	0	0.904	0.885	0.373	0.337	0.996
rplW	rplE	85581.CAY62_12945	85581.CAY62_12895	0.436	0	0	0	0.904	0.885	0.377	0.337	0.996
rplX	rplM	85581.CAY62_12900	85581.CAY62_12405	0.154	0	0.172	0	0.904	0.885	0.402	0.337	0.996
rplX	rpsD	85581.CAY62_12900	85581.CAY62_12835	0.363	0	0	0	0.904	0.885	0.369	0.337	0.996
rplX	rpsJ	85581.CAY62_12900	85581.CAY62_12960	0.426	0	0	0	0.904	0.885	0.381	0.337	0.996
rplX	rpsQ	85581.CAY62_12900	85581.CAY62_12910	0.519	0	0.213	0	0.904	0.885	0	0.337	0.996
rpmA	rpsO	85581.CAY62_01195	85581.CAY62_02105	0.102	0	0.575	0	0.902	0.885	0	0.25	0.996
rpmC	rpsJ	85581.CAY62_12915	85581.CAY62_12960	0.616	0	0	0	0.904	0.885	0	0.337	0.996
rpmD	rpsK	85581.CAY62_12865	85581.CAY62_12840	0.453	0	0	0	0.904	0.885	0.358	0.249	0.996
rpmD	rpsS	85581.CAY62_12865	85581.CAY62_12935	0.408	0	0	0	0.904	0.885	0.343	0.249	0.996
rpmD	rpsC	85581.CAY62_12865	85581.CAY62_12925	0.432	0	0	0	0.904	0.885	0.347	0.337	0.996
rpoA	nusA	85581.CAY62_12830	85581.CAY62_02085	0.097	0	0.712	0	0.801	0.885	0.304	0.337	0.996
rpoA	rpsJ	85581.CAY62_12830	85581.CAY62_12960	0.274	0	0.303	0	0.904	0.881	0.304	0.337	0.996
rpoB	rplK	85581.CAY62_00460	85581.CAY62_00440	0.324	0	0.491	0	0.903	0.88	0	0.337	0.996
rpoB	nusA	85581.CAY62_00460	85581.CAY62_02085	0.154	0	0.575	0	0.878	0.885	0.304	0.208	0.996
rpoB	rpoZ	85581.CAY62_00460	85581.CAY62_13545	0.101	0	0.257	0	0.595	0.885	0.851	0.337	0.996
rpoZ	rpoB	85581.CAY62_13545	85581.CAY62_00460	0.101	0	0.257	0	0.595	0.885	0.851	0.337	0.996
rpsB	rplJ	85581.CAY62_11100	85581.CAY62_00450	0.051	0	0.247	0	0.904	0.885	0.456	0.337	0.996
rpsB	rplM	85581.CAY62_11100	85581.CAY62_12405	0.154	0	0.263	0	0.904	0.885	0.381	0.337	0.996
rpsB	rplB	85581.CAY62_11100	85581.CAY62_12940	0.067	0	0.247	0	0.904	0.885	0.414	0.337	0.996
rpsC	rplJ	85581.CAY62_12925	85581.CAY62_00450	0.154	0	0	0	0.904	0.885	0.47	0.337	0.996
rpsC	rpmD	85581.CAY62_12925	85581.CAY62_12865	0.432	0	0	0	0.904	0.885	0.347	0.337	0.996
rpsD	rplA	85581.CAY62_12835	85581.CAY62_00445	0.097	0	0.205	0	0.904	0.885	0.424	0.337	0.996
rpsD	infA	85581.CAY62_12835	85581.CAY62_09120	0.154	0	0.445	0	0.792	0.885	0.655	0.337	0.996
rpsD	rplX	85581.CAY62_12835	85581.CAY62_12900	0.363	0	0	0	0.904	0.885	0.369	0.337	0.996
rpsD	secY	85581.CAY62_12835	85581.CAY62_12855	0.437	0	0.425	0	0.904	0.864	0	0.337	0.996
rpsD	rplW	85581.CAY62_12835	85581.CAY62_12945	0.283	0	0	0	0.904	0.885	0.393	0.337	0.996
rpsE	rplM	85581.CAY62_12870	85581.CAY62_12405	0.154	0	0.351	0	0.904	0.885	0.373	0.337	0.996
rpsE	rplQ	85581.CAY62_12870	85581.CAY62_12825	0.371	0	0.291	0	0.904	0.885	0	0.337	0.996
rpsE	rplW	85581.CAY62_12870	85581.CAY62_12945	0.385	0	0	0	0.904	0.885	0.373	0.337	0.996
rpsG	rplA	85581.CAY62_12975	85581.CAY62_00445	0.154	0	0.332	0	0.904	0.885	0.348	0.337	0.996
rpsG	rplJ	85581.CAY62_12975	85581.CAY62_00450	0.154	0	0.221	0	0.904	0.885	0.46	0.337	0.996
rpsG	rplM	85581.CAY62_12975	85581.CAY62_12405	0.154	0	0.291	0	0.904	0.885	0.383	0.337	0.996
rpsG	rplO	85581.CAY62_12975	85581.CAY62_12860	0.154	0	0.218	0	0.904	0.885	0.364	0.337	0.996
rpsG	rplR	85581.CAY62_12975	85581.CAY62_12875	0.154	0	0.198	0	0.904	0.885	0.359	0.337	0.996
rpsG	rplF	85581.CAY62_12975	85581.CAY62_12880	0.154	0	0.244	0	0.904	0.885	0.383	0.337	0.996
rpsG	rplV	85581.CAY62_12975	85581.CAY62_12930	0.154	0	0.292	0	0.904	0.885	0.383	0.337	0.996
rpsG	rplC	85581.CAY62_12975	85581.CAY62_12955	0.154	0	0.309	0	0.904	0.885	0.359	0.337	0.996
rpsH	rplM	85581.CAY62_12885	85581.CAY62_12405	0.154	0	0.317	0	0.904	0.885	0.373	0.337	0.996
rpsH	rplQ	85581.CAY62_12885	85581.CAY62_12825	0.363	0	0.289	0	0.904	0.885	0	0.337	0.996
rpsI	rplP	85581.CAY62_12400	85581.CAY62_12920	0.154	0	0.15	0	0.904	0.885	0.404	0.337	0.996
rpsI	rplE	85581.CAY62_12400	85581.CAY62_12895	0.154	0	0.519	0	0.904	0.885	0	0.337	0.996
rpsI	rplN	85581.CAY62_12400	85581.CAY62_12905	0.154	0	0.479	0	0.904	0.885	0	0.337	0.996
rpsI	ARR50334.1	85581.CAY62_12400	85581.CAY62_12950	0.154	0	0.17	0	0.904	0.885	0.385	0.337	0.996
rpsJ	ndk	85581.CAY62_12960	85581.CAY62_02880	0	0	0	0	0.843	0.854	0.851	0	0.996
rpsJ	rpoA	85581.CAY62_12960	85581.CAY62_12830	0.274	0	0.303	0	0.904	0.881	0.304	0.337	0.996
rpsJ	rplO	85581.CAY62_12960	85581.CAY62_12860	0.371	0	0	0	0.904	0.885	0.385	0.337	0.996
rpsJ	rplX	85581.CAY62_12960	85581.CAY62_12900	0.426	0	0	0	0.904	0.885	0.381	0.337	0.996
rpsJ	rpmC	85581.CAY62_12960	85581.CAY62_12915	0.616	0	0	0	0.904	0.885	0	0.337	0.996
rpsK	infA	85581.CAY62_12840	85581.CAY62_09120	0.154	0	0.459	0	0.904	0.885	0.264	0.337	0.996
rpsK	rplM	85581.CAY62_12840	85581.CAY62_12405	0.154	0	0.224	0	0.904	0.885	0.383	0.337	0.996
rpsK	rplQ	85581.CAY62_12840	85581.CAY62_12825	0.587	0	0	0	0.904	0.885	0	0.337	0.996
rpsK	rpmD	85581.CAY62_12840	85581.CAY62_12865	0.453	0	0	0	0.904	0.885	0.358	0.249	0.996
rpsK	rplW	85581.CAY62_12840	85581.CAY62_12945	0.293	0	0	0	0.904	0.885	0.383	0.337	0.996
rpsK	secY	85581.CAY62_12840	85581.CAY62_12855	0.476	0	0.311	0	0.904	0.864	0	0.337	0.996
rpsL	rplM	85581.CAY62_12980	85581.CAY62_12405	0.154	0	0.262	0	0.904	0.885	0.404	0.337	0.996
rpsL	rplO	85581.CAY62_12980	85581.CAY62_12860	0.154	0	0.174	0	0.904	0.885	0.383	0.337	0.996
rpsL	rplR	85581.CAY62_12980	85581.CAY62_12875	0.154	0	0.211	0	0.904	0.885	0.383	0.337	0.996
rpsL	rplC	85581.CAY62_12980	85581.CAY62_12955	0.154	0	0.319	0	0.904	0.885	0.383	0.337	0.996
rpsM	rplC	85581.CAY62_12845	85581.CAY62_12955	0.295	0	0.421	0	0.904	0.885	0	0.337	0.996
rpsM	rplV	85581.CAY62_12845	85581.CAY62_12930	0.311	0	0.463	0	0.904	0.885	0	0.337	0.996
rpsN	rplA	85581.CAY62_12890	85581.CAY62_00445	0.154	0	0	0	0.904	0.885	0.59	0.335	0.996
rpsN	secY	85581.CAY62_12890	85581.CAY62_12855	0.633	0	0	0	0.904	0.864	0	0.322	0.996
rpsO	rpmA	85581.CAY62_02105	85581.CAY62_01195	0.102	0	0.575	0	0.902	0.885	0	0.25	0.996
rpsO	rplN	85581.CAY62_02105	85581.CAY62_12905	0	0	0.18	0	0.904	0.885	0.565	0.337	0.996
rpsO	rplQ	85581.CAY62_02105	85581.CAY62_12825	0.07	0	0.585	0	0.902	0.885	0	0.337	0.996
rpsQ	secY	85581.CAY62_12910	85581.CAY62_12855	0.416	0	0.385	0	0.904	0.865	0	0.337	0.996
rpsQ	rplO	85581.CAY62_12910	85581.CAY62_12860	0.436	0	0.373	0	0.904	0.885	0	0.337	0.996
rpsQ	rplX	85581.CAY62_12910	85581.CAY62_12900	0.519	0	0.213	0	0.904	0.885	0	0.337	0.996
rpsS	rpmD	85581.CAY62_12935	85581.CAY62_12865	0.408	0	0	0	0.904	0.885	0.343	0.249	0.996
secY	rpsD	85581.CAY62_12855	85581.CAY62_12835	0.437	0	0.425	0	0.904	0.864	0	0.337	0.996
secY	rpsK	85581.CAY62_12855	85581.CAY62_12840	0.476	0	0.311	0	0.904	0.864	0	0.337	0.996
secY	rplV	85581.CAY62_12855	85581.CAY62_12930	0.398	0	0.427	0	0.904	0.884	0	0.337	0.996
secY	rpsQ	85581.CAY62_12855	85581.CAY62_12910	0.416	0	0.385	0	0.904	0.865	0	0.337	0.996
secY	yidC	85581.CAY62_12855	85581.CAY62_14205	0	0	0.327	0	0.098	0.851	0.949	0.337	0.996
secY	rpsN	85581.CAY62_12855	85581.CAY62_12890	0.633	0	0	0	0.904	0.864	0	0.322	0.996
yidC	secY	85581.CAY62_14205	85581.CAY62_12855	0	0	0.327	0	0.098	0.851	0.949	0.337	0.996
ARR48473.1	secA	85581.CAY62_02065	85581.CAY62_12260	0.067	0	0	0	0	0.884	0.949	0.337	0.995
ARR48473.1	yidC	85581.CAY62_02065	85581.CAY62_14205	0	0	0.205	0	0.083	0.851	0.949	0.337	0.995
ARR49517.1	mdh	85581.CAY62_07980	85581.CAY62_01175	0.245	0	0	0	0.915	0	0.9	0.389	0.995
ARR49723.1	purH	85581.CAY62_09160	85581.CAY62_00520	0.154	0	0	0	0.902	0.25	0.9	0.337	0.995
ARR49723.1	purC	85581.CAY62_09160	85581.CAY62_04945	0.154	0	0	0	0.904	0.283	0.9	0.337	0.995
ARR50334.1	rplL	85581.CAY62_12950	85581.CAY62_00455	0.154	0	0.188	0	0.904	0.885	0.303	0.337	0.995
ARR50334.1	rplI	85581.CAY62_12950	85581.CAY62_00950	0.048	0	0.17	0	0.904	0.885	0.414	0.337	0.995
ARR50334.1	rplQ	85581.CAY62_12950	85581.CAY62_12825	0.272	0	0.264	0	0.904	0.885	0	0.337	0.995
ARR50334.1	secY	85581.CAY62_12950	85581.CAY62_12855	0.37	0	0.184	0	0.904	0.884	0	0.337	0.995
asnS	metG	85581.CAY62_05330	85581.CAY62_09045	0.219	0	0	0	0.817	0.743	0.851	0.381	0.995
atpD	atpG-2	85581.CAY62_14315	85581.CAY62_18540	0.075	0.001	0.774	0	0.664	0.847	0.599	0.124	0.995
atpG-2	atpD	85581.CAY62_18540	85581.CAY62_14315	0.075	0.001	0.774	0	0.664	0.847	0.599	0.124	0.995
gltA	mdh	85581.CAY62_04125	85581.CAY62_01175	0.154	0	0	0	0.799	0.689	0.9	0.337	0.995
infA	rplE	85581.CAY62_09120	85581.CAY62_12895	0.154	0	0.637	0	0.904	0	0.833	0.192	0.995
map	rplW	85581.CAY62_11105	85581.CAY62_12945	0.154	0	0.152	0	0.789	0.882	0.751	0.152	0.995
mdh	ARR49517.1	85581.CAY62_01175	85581.CAY62_07980	0.245	0	0	0	0.915	0	0.9	0.389	0.995
mdh	gltA	85581.CAY62_01175	85581.CAY62_04125	0.154	0	0	0	0.799	0.689	0.9	0.337	0.995
metG	asnS	85581.CAY62_09045	85581.CAY62_05330	0.219	0	0	0	0.817	0.743	0.851	0.381	0.995
ndk	rpsL	85581.CAY62_02880	85581.CAY62_12980	0.044	0	0	0	0.812	0.854	0.836	0.072	0.995
nqrA	nqrD	85581.CAY62_03140	85581.CAY62_03155	0.799	0	0.768	0	0.153	0.858	0	0.337	0.995
nqrD	nqrA	85581.CAY62_03155	85581.CAY62_03140	0.799	0	0.768	0	0.153	0.858	0	0.337	0.995
nusG	rplK	85581.CAY62_00435	85581.CAY62_00440	0.556	0	0.498	0	0.902	0.709	0	0.337	0.995
nusG	rpoB	85581.CAY62_00435	85581.CAY62_00460	0.285	0	0.72	0	0.753	0.852	0.304	0.337	0.995
purC	ARR49723.1	85581.CAY62_04945	85581.CAY62_09160	0.154	0	0	0	0.904	0.283	0.9	0.337	0.995
purH	ARR49723.1	85581.CAY62_00520	85581.CAY62_09160	0.154	0	0	0	0.902	0.25	0.9	0.337	0.995
rplA	rpsB	85581.CAY62_00445	85581.CAY62_11100	0	0	0.266	0	0.904	0.885	0.346	0.337	0.995
rplA	rplP	85581.CAY62_00445	85581.CAY62_12920	0.154	0	0	0	0.904	0.885	0.354	0.337	0.995
rplA	rpsS	85581.CAY62_00445	85581.CAY62_12935	0.154	0	0	0	0.904	0.885	0.334	0.337	0.995
rplA	rpsJ	85581.CAY62_00445	85581.CAY62_12960	0.154	0	0	0	0.904	0.885	0.367	0.337	0.995
rplA	rpsC	85581.CAY62_00445	85581.CAY62_12925	0.154	0	0	0	0.904	0.885	0.336	0.337	0.995
rplA	rpsP	85581.CAY62_00445	85581.CAY62_11435	0	0	0.461	0	0.904	0.885	0	0.337	0.995
rplA	rplN	85581.CAY62_00445	85581.CAY62_12905	0.154	0	0.224	0	0.904	0.885	0.324	0.337	0.995
rplB	rplJ	85581.CAY62_12940	85581.CAY62_00450	0.154	0	0	0	0.904	0.885	0.334	0.337	0.995
rplB	rplQ	85581.CAY62_12940	85581.CAY62_12825	0.274	0	0.243	0	0.904	0.885	0	0.337	0.995
rplB	secY	85581.CAY62_12940	85581.CAY62_12855	0.38	0	0.245	0	0.904	0.878	0	0.337	0.995
rplC	rpsB	85581.CAY62_12955	85581.CAY62_11100	0.068	0	0.206	0	0.904	0.885	0.359	0.337	0.995
rplC	secY	85581.CAY62_12955	85581.CAY62_12855	0.362	0	0.218	0	0.904	0.878	0	0.337	0.995
rplC	rpsN	85581.CAY62_12955	85581.CAY62_12890	0.416	0	0	0	0.904	0.885	0	0.337	0.995
rplE	rplJ	85581.CAY62_12895	85581.CAY62_00450	0.154	0	0	0	0.904	0.885	0.377	0.337	0.995
rplE	infA	85581.CAY62_12895	85581.CAY62_09120	0.154	0	0.637	0	0.904	0	0.833	0.192	0.995
rplE	rplQ	85581.CAY62_12895	85581.CAY62_12825	0.336	0	0.165	0	0.904	0.885	0	0.337	0.995
rplF	rplK	85581.CAY62_12880	85581.CAY62_00440	0.154	0	0.203	0	0.904	0.885	0.226	0.337	0.995
rplF	rpoA	85581.CAY62_12880	85581.CAY62_12830	0.393	0	0.282	0	0.904	0.854	0	0.337	0.995
rplI	rplL	85581.CAY62_00950	85581.CAY62_00455	0	0	0.205	0	0.904	0.885	0.352	0.337	0.995
rplI	ARR50334.1	85581.CAY62_00950	85581.CAY62_12950	0.048	0	0.17	0	0.904	0.885	0.414	0.337	0.995
rplI	rplO	85581.CAY62_00950	85581.CAY62_12860	0.043	0	0	0	0.904	0.885	0.46	0.337	0.995
rplJ	rpsH	85581.CAY62_00450	85581.CAY62_12885	0.154	0	0	0	0.904	0.885	0.323	0.337	0.995
rplJ	rpsL	85581.CAY62_00450	85581.CAY62_12980	0.154	0	0	0	0.904	0.885	0.346	0.337	0.995
rplJ	rpsK	85581.CAY62_00450	85581.CAY62_12840	0.102	0	0	0	0.904	0.885	0.456	0.337	0.995
rplJ	rplN	85581.CAY62_00450	85581.CAY62_12905	0.154	0	0	0	0.904	0.885	0.377	0.337	0.995
rplJ	rpsF	85581.CAY62_00450	85581.CAY62_00935	0	0	0.401	0	0.904	0.885	0	0.337	0.995
rplJ	rplE	85581.CAY62_00450	85581.CAY62_12895	0.154	0	0	0	0.904	0.885	0.377	0.337	0.995
rplJ	rpsQ	85581.CAY62_00450	85581.CAY62_12910	0.154	0	0	0	0.904	0.885	0.332	0.337	0.995
rplJ	rplB	85581.CAY62_00450	85581.CAY62_12940	0.154	0	0	0	0.904	0.885	0.334	0.337	0.995
rplJ	rpoB	85581.CAY62_00450	85581.CAY62_00460	0.423	0	0.322	0	0.903	0.85	0.1	0.337	0.995
rplK	nusG	85581.CAY62_00440	85581.CAY62_00435	0.556	0	0.498	0	0.902	0.709	0	0.337	0.995
rplK	rplN	85581.CAY62_00440	85581.CAY62_12905	0.154	0	0.25	0	0.904	0.885	0.287	0.337	0.995
rplK	rplV	85581.CAY62_00440	85581.CAY62_12930	0.154	0	0	0	0.904	0.885	0.357	0.337	0.995
rplK	rplF	85581.CAY62_00440	85581.CAY62_12880	0.154	0	0.203	0	0.904	0.885	0.226	0.337	0.995
rplK	rpsG	85581.CAY62_00440	85581.CAY62_12975	0.154	0	0.429	0	0.904	0.885	0	0.337	0.995
rplK	rpsL	85581.CAY62_00440	85581.CAY62_12980	0.154	0	0.427	0	0.904	0.885	0	0.337	0.995
rplK	rplX	85581.CAY62_00440	85581.CAY62_12900	0.154	0	0	0	0.904	0.885	0.322	0.337	0.995
rplK	rplM	85581.CAY62_00440	85581.CAY62_12405	0.058	0	0.226	0	0.904	0.885	0.325	0.337	0.995
rplL	ARR50334.1	85581.CAY62_00455	85581.CAY62_12950	0.154	0	0.188	0	0.904	0.885	0.303	0.337	0.995
rplL	rplO	85581.CAY62_00455	85581.CAY62_12860	0.154	0	0	0	0.904	0.885	0.332	0.337	0.995
rplL	rpoB	85581.CAY62_00455	85581.CAY62_00460	0.498	0	0.559	0	0.899	0.716	0	0.337	0.995
rplL	rpsG	85581.CAY62_00455	85581.CAY62_12975	0.154	0	0.411	0	0.904	0.885	0	0.337	0.995
rplL	rplI	85581.CAY62_00455	85581.CAY62_00950	0	0	0.205	0	0.904	0.885	0.352	0.337	0.995
rplM	rplK	85581.CAY62_12405	85581.CAY62_00440	0.058	0	0.226	0	0.904	0.885	0.325	0.337	0.995
rplM	rpsO	85581.CAY62_12405	85581.CAY62_02105	0.102	0	0.411	0	0.904	0.885	0.071	0.337	0.995
rplM	rpsC	85581.CAY62_12405	85581.CAY62_12925	0.154	0	0	0	0.904	0.885	0.37	0.337	0.995
rplM	rpsQ	85581.CAY62_12405	85581.CAY62_12910	0.154	0	0.375	0	0.904	0.885	0.076	0.337	0.995
rplM	rpsS	85581.CAY62_12405	85581.CAY62_12935	0.154	0	0	0	0.904	0.885	0.365	0.337	0.995
rplM	rpsJ	85581.CAY62_12405	85581.CAY62_12960	0.129	0	0	0	0.904	0.885	0.406	0.337	0.995
rplM	rpsM	85581.CAY62_12405	85581.CAY62_12845	0.154	0	0.31	0	0.904	0.885	0.076	0.337	0.995
rplN	rplK	85581.CAY62_12905	85581.CAY62_00440	0.154	0	0.25	0	0.904	0.885	0.287	0.337	0.995
rplN	rplA	85581.CAY62_12905	85581.CAY62_00445	0.154	0	0.224	0	0.904	0.885	0.324	0.337	0.995
rplN	rplJ	85581.CAY62_12905	85581.CAY62_00450	0.154	0	0	0	0.904	0.885	0.377	0.337	0.995
rplO	rplL	85581.CAY62_12860	85581.CAY62_00455	0.154	0	0	0	0.904	0.885	0.332	0.337	0.995
rplO	rplI	85581.CAY62_12860	85581.CAY62_00950	0.043	0	0	0	0.904	0.885	0.46	0.337	0.995
rplO	rpsB	85581.CAY62_12860	85581.CAY62_11100	0.067	0	0.164	0	0.904	0.885	0.361	0.337	0.995
rplP	rplA	85581.CAY62_12920	85581.CAY62_00445	0.154	0	0	0	0.904	0.885	0.354	0.337	0.995
rplQ	rpsQ	85581.CAY62_12825	85581.CAY62_12910	0.283	0	0.223	0	0.904	0.885	0	0.323	0.995
rplQ	rplV	85581.CAY62_12825	85581.CAY62_12930	0.279	0	0.254	0	0.904	0.885	0	0.337	0.995
rplQ	rplB	85581.CAY62_12825	85581.CAY62_12940	0.274	0	0.243	0	0.904	0.885	0	0.337	0.995
rplQ	rpoA	85581.CAY62_12825	85581.CAY62_12830	0.707	0	0.254	0	0.904	0.709	0	0.337	0.995
rplQ	rplE	85581.CAY62_12825	85581.CAY62_12895	0.336	0	0.165	0	0.904	0.885	0	0.337	0.995
rplQ	ARR50334.1	85581.CAY62_12825	85581.CAY62_12950	0.272	0	0.264	0	0.904	0.885	0	0.337	0.995
rplQ	rpsL	85581.CAY62_12825	85581.CAY62_12980	0.154	0	0.334	0	0.904	0.885	0	0.337	0.995
rplR	rpsB	85581.CAY62_12875	85581.CAY62_11100	0.056	0	0.223	0	0.904	0.885	0.359	0.337	0.995
rplV	rplK	85581.CAY62_12930	85581.CAY62_00440	0.154	0	0	0	0.904	0.885	0.357	0.337	0.995
rplV	rpsB	85581.CAY62_12930	85581.CAY62_11100	0.069	0	0.208	0	0.904	0.885	0.381	0.337	0.995
rplV	rplQ	85581.CAY62_12930	85581.CAY62_12825	0.279	0	0.254	0	0.904	0.885	0	0.337	0.995
rplV	rpsN	85581.CAY62_12930	85581.CAY62_12890	0.467	0	0	0	0.904	0.885	0	0.337	0.995
rplV	rpsL	85581.CAY62_12930	85581.CAY62_12980	0.154	0	0	0	0.904	0.885	0.404	0.337	0.995
rplW	rpsB	85581.CAY62_12945	85581.CAY62_11100	0.067	0	0	0	0.904	0.885	0.381	0.337	0.995
rplW	map	85581.CAY62_12945	85581.CAY62_11105	0.154	0	0.152	0	0.789	0.882	0.751	0.152	0.995
rplW	rpsN	85581.CAY62_12945	85581.CAY62_12890	0.426	0	0	0	0.904	0.885	0.084	0.337	0.995
rplW	rpsG	85581.CAY62_12945	85581.CAY62_12975	0.154	0	0	0	0.904	0.885	0.383	0.337	0.995
rplX	rplK	85581.CAY62_12900	85581.CAY62_00440	0.154	0	0	0	0.904	0.885	0.322	0.337	0.995
rplX	rpsM	85581.CAY62_12900	85581.CAY62_12845	0.402	0	0.211	0	0.904	0.885	0	0.337	0.995
rplX	rpsG	85581.CAY62_12900	85581.CAY62_12975	0.154	0	0	0	0.904	0.885	0.36	0.337	0.995
rplX	rpsL	85581.CAY62_12900	85581.CAY62_12980	0.154	0	0	0	0.904	0.885	0.38	0.337	0.995
rpmB	rpsN	85581.CAY62_13500	85581.CAY62_12890	0.154	0	0.49	0	0.894	0.885	0	0.337	0.995
rpmC	rpsE	85581.CAY62_12915	85581.CAY62_12870	0.436	0	0	0	0.904	0.885	0	0.337	0.995
rpmC	rpsH	85581.CAY62_12915	85581.CAY62_12885	0.446	0	0	0	0.904	0.885	0	0.337	0.995
rpmC	rpsN	85581.CAY62_12915	85581.CAY62_12890	0.491	0	0	0	0.904	0.885	0	0.337	0.995
rpmD	rpsM	85581.CAY62_12865	85581.CAY62_12845	0.471	0	0	0	0.904	0.885	0	0.337	0.995
rpmD	rpsJ	85581.CAY62_12865	85581.CAY62_12960	0.371	0	0	0	0.904	0.885	0.38	0.209	0.995
rpmD	rpsQ	85581.CAY62_12865	85581.CAY62_12910	0.436	0	0	0	0.904	0.885	0	0.337	0.995
rpmD	rpsL	85581.CAY62_12865	85581.CAY62_12980	0.154	0	0	0	0.904	0.885	0.378	0.337	0.995
rpmD	rpsG	85581.CAY62_12865	85581.CAY62_12975	0.154	0	0	0	0.904	0.885	0.358	0.337	0.995
rpoA	rplQ	85581.CAY62_12830	85581.CAY62_12825	0.707	0	0.254	0	0.904	0.709	0	0.337	0.995
rpoA	rplF	85581.CAY62_12830	85581.CAY62_12880	0.393	0	0.282	0	0.904	0.854	0	0.337	0.995
rpoA	rpsQ	85581.CAY62_12830	85581.CAY62_12910	0.293	0	0.323	0	0.904	0.869	0	0.337	0.995
rpoB	nusG	85581.CAY62_00460	85581.CAY62_00435	0.285	0	0.72	0	0.753	0.852	0.304	0.337	0.995
rpoB	rplJ	85581.CAY62_00460	85581.CAY62_00450	0.423	0	0.322	0	0.903	0.85	0.1	0.337	0.995
rpoB	rplL	85581.CAY62_00460	85581.CAY62_00455	0.498	0	0.559	0	0.899	0.716	0	0.337	0.995
rpoB	rpsJ	85581.CAY62_00460	85581.CAY62_12960	0.154	0	0.295	0	0.903	0.853	0.304	0.337	0.995
rpsA	rpsF	85581.CAY62_08215	85581.CAY62_00935	0.056	0	0	0	0.88	0.709	0.851	0.254	0.995
rpsA	rpsR	85581.CAY62_08215	85581.CAY62_00945	0.051	0	0	0	0.785	0.852	0.851	0.186	0.995
rpsA	rpsI	85581.CAY62_08215	85581.CAY62_12400	0.057	0	0	0	0.77	0.856	0.851	0.252	0.995
rpsA	rpsN	85581.CAY62_08215	85581.CAY62_12890	0.046	0	0	0	0.767	0.856	0.851	0.204	0.995
rpsB	rplA	85581.CAY62_11100	85581.CAY62_00445	0	0	0.266	0	0.904	0.885	0.346	0.337	0.995
rpsB	rplC	85581.CAY62_11100	85581.CAY62_12955	0.068	0	0.206	0	0.904	0.885	0.359	0.337	0.995
rpsB	rplR	85581.CAY62_11100	85581.CAY62_12875	0.056	0	0.223	0	0.904	0.885	0.359	0.337	0.995
rpsB	rplV	85581.CAY62_11100	85581.CAY62_12930	0.069	0	0.208	0	0.904	0.885	0.381	0.337	0.995
rpsB	rplW	85581.CAY62_11100	85581.CAY62_12945	0.067	0	0	0	0.904	0.885	0.381	0.337	0.995
rpsB	rplO	85581.CAY62_11100	85581.CAY62_12860	0.067	0	0.164	0	0.904	0.885	0.361	0.337	0.995
rpsC	rplA	85581.CAY62_12925	85581.CAY62_00445	0.154	0	0	0	0.904	0.885	0.336	0.337	0.995
rpsC	rpsP	85581.CAY62_12925	85581.CAY62_11435	0	0	0	0	0.9	0.885	0.427	0.337	0.995
rpsC	rplM	85581.CAY62_12925	85581.CAY62_12405	0.154	0	0	0	0.904	0.885	0.37	0.337	0.995
rpsD	rpsR	85581.CAY62_12835	85581.CAY62_00945	0	0	0.207	0	0.904	0.885	0.395	0.337	0.995
rpsE	rpmC	85581.CAY62_12870	85581.CAY62_12915	0.436	0	0	0	0.904	0.885	0	0.337	0.995
rpsF	rplJ	85581.CAY62_00935	85581.CAY62_00450	0	0	0.401	0	0.904	0.885	0	0.337	0.995
rpsF	rpsA	85581.CAY62_00935	85581.CAY62_08215	0.056	0	0	0	0.88	0.709	0.851	0.254	0.995
rpsG	rplK	85581.CAY62_12975	85581.CAY62_00440	0.154	0	0.429	0	0.904	0.885	0	0.337	0.995
rpsG	rplL	85581.CAY62_12975	85581.CAY62_00455	0.154	0	0.411	0	0.904	0.885	0	0.337	0.995
rpsG	rpmD	85581.CAY62_12975	85581.CAY62_12865	0.154	0	0	0	0.904	0.885	0.358	0.337	0.995
rpsG	rplX	85581.CAY62_12975	85581.CAY62_12900	0.154	0	0	0	0.904	0.885	0.36	0.337	0.995
rpsG	rplW	85581.CAY62_12975	85581.CAY62_12945	0.154	0	0	0	0.904	0.885	0.383	0.337	0.995
rpsH	rplJ	85581.CAY62_12885	85581.CAY62_00450	0.154	0	0	0	0.904	0.885	0.323	0.337	0.995
rpsH	rpmC	85581.CAY62_12885	85581.CAY62_12915	0.446	0	0	0	0.904	0.885	0	0.337	0.995
rpsI	rpsA	85581.CAY62_12400	85581.CAY62_08215	0.057	0	0	0	0.77	0.856	0.851	0.252	0.995
rpsJ	rplA	85581.CAY62_12960	85581.CAY62_00445	0.154	0	0	0	0.904	0.885	0.367	0.337	0.995
rpsJ	rpoB	85581.CAY62_12960	85581.CAY62_00460	0.154	0	0.295	0	0.903	0.853	0.304	0.337	0.995
rpsJ	rplM	85581.CAY62_12960	85581.CAY62_12405	0.129	0	0	0	0.904	0.885	0.406	0.337	0.995
rpsJ	rpmD	85581.CAY62_12960	85581.CAY62_12865	0.371	0	0	0	0.904	0.885	0.38	0.209	0.995
rpsK	rplJ	85581.CAY62_12840	85581.CAY62_00450	0.102	0	0	0	0.904	0.885	0.456	0.337	0.995
rpsL	rplK	85581.CAY62_12980	85581.CAY62_00440	0.154	0	0.427	0	0.904	0.885	0	0.337	0.995
rpsL	rplJ	85581.CAY62_12980	85581.CAY62_00450	0.154	0	0	0	0.904	0.885	0.346	0.337	0.995
rpsL	rpsR	85581.CAY62_12980	85581.CAY62_00945	0.061	0	0	0	0.903	0.885	0.427	0.337	0.995
rpsL	ndk	85581.CAY62_12980	85581.CAY62_02880	0.044	0	0	0	0.812	0.854	0.836	0.072	0.995
rpsL	rplQ	85581.CAY62_12980	85581.CAY62_12825	0.154	0	0.334	0	0.904	0.885	0	0.337	0.995
rpsL	rpmD	85581.CAY62_12980	85581.CAY62_12865	0.154	0	0	0	0.904	0.885	0.378	0.337	0.995
rpsL	rplX	85581.CAY62_12980	85581.CAY62_12900	0.154	0	0	0	0.904	0.885	0.38	0.337	0.995
rpsL	rplV	85581.CAY62_12980	85581.CAY62_12930	0.154	0	0	0	0.904	0.885	0.404	0.337	0.995
rpsM	rplM	85581.CAY62_12845	85581.CAY62_12405	0.154	0	0.31	0	0.904	0.885	0.076	0.337	0.995
rpsM	rplX	85581.CAY62_12845	85581.CAY62_12900	0.402	0	0.211	0	0.904	0.885	0	0.337	0.995
rpsM	rpmD	85581.CAY62_12845	85581.CAY62_12865	0.471	0	0	0	0.904	0.885	0	0.337	0.995
rpsN	rpsR	85581.CAY62_12890	85581.CAY62_00945	0.154	0	0	0	0.904	0.885	0.427	0.337	0.995
rpsN	rpsA	85581.CAY62_12890	85581.CAY62_08215	0.046	0	0	0	0.767	0.856	0.851	0.204	0.995
rpsN	rplC	85581.CAY62_12890	85581.CAY62_12955	0.416	0	0	0	0.904	0.885	0	0.337	0.995
rpsN	rplV	85581.CAY62_12890	85581.CAY62_12930	0.467	0	0	0	0.904	0.885	0	0.337	0.995
rpsN	rplW	85581.CAY62_12890	85581.CAY62_12945	0.426	0	0	0	0.904	0.885	0.084	0.337	0.995
rpsN	rpmC	85581.CAY62_12890	85581.CAY62_12915	0.491	0	0	0	0.904	0.885	0	0.337	0.995
rpsN	rpmB	85581.CAY62_12890	85581.CAY62_13500	0.154	0	0.49	0	0.894	0.885	0	0.337	0.995
rpsO	rpsT	85581.CAY62_02105	85581.CAY62_01970	0.154	0	0	0	0.899	0.885	0.395	0.337	0.995
rpsO	rplM	85581.CAY62_02105	85581.CAY62_12405	0.102	0	0.411	0	0.904	0.885	0.071	0.337	0.995
rpsP	rplA	85581.CAY62_11435	85581.CAY62_00445	0	0	0.461	0	0.904	0.885	0	0.337	0.995
rpsP	rpsU	85581.CAY62_11435	85581.CAY62_01360	0.102	0	0.214	0	0.896	0.885	0.427	0.298	0.995
rpsP	rpsT	85581.CAY62_11435	85581.CAY62_01970	0.101	0	0	0	0.898	0.885	0.427	0.337	0.995
rpsP	rpsC	85581.CAY62_11435	85581.CAY62_12925	0	0	0	0	0.9	0.885	0.427	0.337	0.995
rpsQ	rplJ	85581.CAY62_12910	85581.CAY62_00450	0.154	0	0	0	0.904	0.885	0.332	0.337	0.995
rpsQ	rplM	85581.CAY62_12910	85581.CAY62_12405	0.154	0	0.375	0	0.904	0.885	0.076	0.337	0.995
rpsQ	rplQ	85581.CAY62_12910	85581.CAY62_12825	0.283	0	0.223	0	0.904	0.885	0	0.323	0.995
rpsQ	rpoA	85581.CAY62_12910	85581.CAY62_12830	0.293	0	0.323	0	0.904	0.869	0	0.337	0.995
rpsQ	rpmD	85581.CAY62_12910	85581.CAY62_12865	0.436	0	0	0	0.904	0.885	0	0.337	0.995
rpsR	rpsN	85581.CAY62_00945	85581.CAY62_12890	0.154	0	0	0	0.904	0.885	0.427	0.337	0.995
rpsR	rpsA	85581.CAY62_00945	85581.CAY62_08215	0.051	0	0	0	0.785	0.852	0.851	0.186	0.995
rpsR	rpsL	85581.CAY62_00945	85581.CAY62_12980	0.061	0	0	0	0.903	0.885	0.427	0.337	0.995
rpsR	rpsD	85581.CAY62_00945	85581.CAY62_12835	0	0	0.207	0	0.904	0.885	0.395	0.337	0.995
rpsS	rplA	85581.CAY62_12935	85581.CAY62_00445	0.154	0	0	0	0.904	0.885	0.334	0.337	0.995
rpsS	rplM	85581.CAY62_12935	85581.CAY62_12405	0.154	0	0	0	0.904	0.885	0.365	0.337	0.995
rpsS	secY	85581.CAY62_12935	85581.CAY62_12855	0.392	0	0.284	0	0.904	0.865	0	0.337	0.995
rpsT	rpsU	85581.CAY62_01970	85581.CAY62_01360	0.097	0	0	0	0.901	0.885	0.427	0.337	0.995
rpsT	rpsP	85581.CAY62_01970	85581.CAY62_11435	0.101	0	0	0	0.898	0.885	0.427	0.337	0.995
rpsT	rpsO	85581.CAY62_01970	85581.CAY62_02105	0.154	0	0	0	0.899	0.885	0.395	0.337	0.995
rpsU	rpsT	85581.CAY62_01360	85581.CAY62_01970	0.097	0	0	0	0.901	0.885	0.427	0.337	0.995
rpsU	rpsP	85581.CAY62_01360	85581.CAY62_11435	0.102	0	0.214	0	0.896	0.885	0.427	0.298	0.995
secA	ARR48473.1	85581.CAY62_12260	85581.CAY62_02065	0.067	0	0	0	0	0.884	0.949	0.337	0.995
secY	rpsS	85581.CAY62_12855	85581.CAY62_12935	0.392	0	0.284	0	0.904	0.865	0	0.337	0.995
secY	ARR50334.1	85581.CAY62_12855	85581.CAY62_12950	0.37	0	0.184	0	0.904	0.884	0	0.337	0.995
secY	rplB	85581.CAY62_12855	85581.CAY62_12940	0.38	0	0.245	0	0.904	0.878	0	0.337	0.995
secY	rplC	85581.CAY62_12855	85581.CAY62_12955	0.362	0	0.218	0	0.904	0.878	0	0.337	0.995
yidC	ARR48473.1	85581.CAY62_14205	85581.CAY62_02065	0	0	0.205	0	0.083	0.851	0.949	0.337	0.995
ARR50334.1	rplK	85581.CAY62_12950	85581.CAY62_00440	0.154	0	0.206	0	0.904	0.885	0	0.337	0.994
fusA-2	rplB	85581.CAY62_12970	85581.CAY62_12940	0.095	0	0.696	0	0.786	0.853	0.352	0.183	0.994
gyrA	gyrB	85581.CAY62_04895	85581.CAY62_14155	0.075	0.037	0.773	0	0.662	0.847	0.469	0.183	0.994
gyrB	gyrA	85581.CAY62_14155	85581.CAY62_04895	0.075	0.037	0.773	0	0.662	0.847	0.469	0.183	0.994
infA	rplB	85581.CAY62_09120	85581.CAY62_12940	0.154	0	0.37	0	0.904	0.27	0.832	0.337	0.994
infA	rpsB	85581.CAY62_09120	85581.CAY62_11100	0.073	0	0.353	0	0.748	0.885	0.579	0.337	0.994
map	rpmC	85581.CAY62_11105	85581.CAY62_12915	0.154	0	0	0	0.899	0.878	0.46	0.119	0.994
ndk	rpsO	85581.CAY62_02880	85581.CAY62_02105	0.075	0	0	0	0.779	0.855	0.851	0	0.994
ndk	rpsB	85581.CAY62_02880	85581.CAY62_11100	0	0	0	0	0.731	0.855	0.851	0.187	0.994
ndk	rpsG	85581.CAY62_02880	85581.CAY62_12975	0	0	0	0	0.781	0.854	0.851	0	0.994
nqrA	nqrF	85581.CAY62_03140	85581.CAY62_03165	0.732	0	0.774	0	0.123	0.873	0	0.337	0.994
nqrF	nqrA	85581.CAY62_03165	85581.CAY62_03140	0.732	0	0.774	0	0.123	0.873	0	0.337	0.994
purD	purH	85581.CAY62_00515	85581.CAY62_00520	0.695	0	0.743	0	0.904	0.092	0	0.337	0.994
purF	purM	85581.CAY62_09740	85581.CAY62_10810	0.154	0.656	0.763	0	0.904	0	0	0.337	0.994
purH	purD	85581.CAY62_00520	85581.CAY62_00515	0.695	0	0.743	0	0.904	0.092	0	0.337	0.994
purM	purF	85581.CAY62_10810	85581.CAY62_09740	0.154	0.656	0.763	0	0.904	0	0	0.337	0.994
rplA	rpsK	85581.CAY62_00445	85581.CAY62_12840	0.101	0	0	0	0.904	0.885	0.348	0.337	0.994
rplA	rpsM	85581.CAY62_00445	85581.CAY62_12845	0.101	0	0.302	0	0.904	0.885	0	0.337	0.994
rplA	rpsI	85581.CAY62_00445	85581.CAY62_12400	0.054	0	0.321	0	0.904	0.885	0	0.337	0.994
rplA	rpsQ	85581.CAY62_00445	85581.CAY62_12910	0.154	0	0.263	0	0.904	0.885	0	0.337	0.994
rplB	rplK	85581.CAY62_12940	85581.CAY62_00440	0.154	0	0.16	0	0.904	0.885	0.193	0.337	0.994
rplB	rpsO	85581.CAY62_12940	85581.CAY62_02105	0	0	0.191	0	0.885	0.885	0.304	0.337	0.994
rplB	infA	85581.CAY62_12940	85581.CAY62_09120	0.154	0	0.37	0	0.904	0.27	0.832	0.337	0.994
rplB	rpsI	85581.CAY62_12940	85581.CAY62_12400	0.154	0	0.23	0	0.904	0.885	0	0.337	0.994
rplB	rpoA	85581.CAY62_12940	85581.CAY62_12830	0.281	0	0.335	0	0.904	0.855	0	0.337	0.994
rplB	fusA-2	85581.CAY62_12940	85581.CAY62_12970	0.095	0	0.696	0	0.786	0.853	0.352	0.183	0.994
rplC	rplL	85581.CAY62_12955	85581.CAY62_00455	0.154	0	0.217	0	0.904	0.885	0	0.337	0.994
rplC	rpmA	85581.CAY62_12955	85581.CAY62_01195	0.049	0	0.33	0	0.904	0.885	0	0.337	0.994
rplC	rpsO	85581.CAY62_12955	85581.CAY62_02105	0	0	0.347	0	0.902	0.885	0	0.337	0.994
rplC	rpsI	85581.CAY62_12955	85581.CAY62_12400	0.154	0	0.182	0	0.904	0.885	0	0.337	0.994
rplC	rpoA	85581.CAY62_12955	85581.CAY62_12830	0.276	0	0.303	0	0.904	0.852	0	0.337	0.994
rplE	rplK	85581.CAY62_12895	85581.CAY62_00440	0.154	0	0	0	0.904	0.885	0.287	0.337	0.994
rplE	rplL	85581.CAY62_12895	85581.CAY62_00455	0.154	0	0.212	0	0.904	0.885	0	0.337	0.994
rplE	rpsO	85581.CAY62_12895	85581.CAY62_02105	0	0	0	0	0.903	0.885	0.344	0.337	0.994
rplF	rpsO	85581.CAY62_12880	85581.CAY62_02105	0	0	0.303	0	0.903	0.885	0	0.337	0.994
rplF	rpsI	85581.CAY62_12880	85581.CAY62_12400	0.154	0	0.265	0	0.902	0.885	0	0.337	0.994
rplJ	rpsO	85581.CAY62_00450	85581.CAY62_02105	0.064	0	0	0	0.903	0.885	0.344	0.337	0.994
rplJ	rpsJ	85581.CAY62_00450	85581.CAY62_12960	0.154	0	0	0	0.904	0.885	0.347	0.24	0.994
rplJ	rpsS	85581.CAY62_00450	85581.CAY62_12935	0.154	0	0	0	0.904	0.885	0.315	0.33	0.994
rplK	rplE	85581.CAY62_00440	85581.CAY62_12895	0.154	0	0	0	0.904	0.885	0.287	0.337	0.994
rplK	rpsQ	85581.CAY62_00440	85581.CAY62_12910	0.154	0	0.187	0	0.904	0.885	0	0.337	0.994
rplK	rplB	85581.CAY62_00440	85581.CAY62_12940	0.154	0	0.16	0	0.904	0.885	0.193	0.337	0.994
rplK	rpsJ	85581.CAY62_00440	85581.CAY62_12960	0.154	0	0.269	0	0.904	0.885	0	0.337	0.994
rplK	rpmC	85581.CAY62_00440	85581.CAY62_12915	0.154	0	0	0	0.904	0.885	0.287	0.337	0.994
rplK	rpmD	85581.CAY62_00440	85581.CAY62_12865	0.102	0	0	0	0.904	0.885	0.306	0.33	0.994
rplK	rplO	85581.CAY62_00440	85581.CAY62_12860	0.154	0	0	0	0.904	0.885	0.226	0.337	0.994
rplK	ARR50334.1	85581.CAY62_00440	85581.CAY62_12950	0.154	0	0.206	0	0.904	0.885	0	0.337	0.994
rplK	rplR	85581.CAY62_00440	85581.CAY62_12875	0.154	0	0	0	0.904	0.885	0.287	0.337	0.994
rplL	rpsP	85581.CAY62_00455	85581.CAY62_11435	0	0	0.353	0	0.904	0.885	0	0.337	0.994
rplL	rpsI	85581.CAY62_00455	85581.CAY62_12400	0	0	0.288	0	0.904	0.885	0	0.337	0.994
rplL	rpsQ	85581.CAY62_00455	85581.CAY62_12910	0.154	0	0.224	0	0.904	0.881	0	0.337	0.994
rplL	rplE	85581.CAY62_00455	85581.CAY62_12895	0.154	0	0.212	0	0.904	0.885	0	0.337	0.994
rplL	rplN	85581.CAY62_00455	85581.CAY62_12905	0.154	0	0.199	0	0.904	0.885	0	0.337	0.994
rplL	rpmA	85581.CAY62_00455	85581.CAY62_01195	0.099	0	0.247	0	0.904	0.885	0	0.337	0.994
rplL	rpsJ	85581.CAY62_00455	85581.CAY62_12960	0.154	0	0.204	0	0.904	0.885	0	0.337	0.994
rplL	rpsB	85581.CAY62_00455	85581.CAY62_11100	0.066	0	0.319	0	0.904	0.885	0	0.337	0.994
rplL	rpsL	85581.CAY62_00455	85581.CAY62_12980	0.154	0	0.289	0	0.904	0.885	0	0.337	0.994
rplL	rpsM	85581.CAY62_00455	85581.CAY62_12845	0.154	0	0.238	0	0.904	0.883	0	0.337	0.994
rplL	rpsH	85581.CAY62_00455	85581.CAY62_12885	0.154	0	0.22	0	0.904	0.883	0	0.337	0.994
rplL	rplC	85581.CAY62_00455	85581.CAY62_12955	0.154	0	0.217	0	0.904	0.885	0	0.337	0.994
rplL	rplM	85581.CAY62_00455	85581.CAY62_12405	0.049	0	0.307	0	0.904	0.885	0	0.337	0.994
rplL	rplQ	85581.CAY62_00455	85581.CAY62_12825	0.102	0	0.273	0	0.904	0.885	0	0.337	0.994
rplL	rplS	85581.CAY62_00455	85581.CAY62_11420	0.043	0	0.354	0	0.904	0.885	0	0.337	0.994
rplM	rplL	85581.CAY62_12405	85581.CAY62_00455	0.049	0	0.307	0	0.904	0.885	0	0.337	0.994
rplM	rpmA	85581.CAY62_12405	85581.CAY62_01195	0.154	0	0.317	0	0.904	0.885	0	0.337	0.994
rplM	rplQ	85581.CAY62_12405	85581.CAY62_12825	0.154	0	0.198	0	0.904	0.885	0	0.337	0.994
rplN	rplL	85581.CAY62_12905	85581.CAY62_00455	0.154	0	0.199	0	0.904	0.885	0	0.337	0.994
rplN	rpoA	85581.CAY62_12905	85581.CAY62_12830	0.347	0	0.614	0	0.904	0.709	0	0.337	0.994
rplO	rplK	85581.CAY62_12860	85581.CAY62_00440	0.154	0	0	0	0.904	0.885	0.226	0.337	0.994
rplO	rpsO	85581.CAY62_12860	85581.CAY62_02105	0	0	0.387	0	0.903	0.885	0	0.337	0.994
rplO	rpsI	85581.CAY62_12860	85581.CAY62_12400	0.154	0	0.206	0	0.903	0.885	0	0.337	0.994
rplP	rpsP	85581.CAY62_12920	85581.CAY62_11435	0	0	0	0	0.903	0.885	0.395	0.337	0.994
rplQ	rplL	85581.CAY62_12825	85581.CAY62_00455	0.102	0	0.273	0	0.904	0.885	0	0.337	0.994
rplQ	rplS	85581.CAY62_12825	85581.CAY62_11420	0.051	0	0.422	0	0.904	0.885	0	0.212	0.994
rplQ	rpsP	85581.CAY62_12825	85581.CAY62_11435	0.092	0	0.265	0	0.904	0.885	0	0.337	0.994
rplQ	rplM	85581.CAY62_12825	85581.CAY62_12405	0.154	0	0.198	0	0.904	0.885	0	0.337	0.994
rplQ	rpsC	85581.CAY62_12825	85581.CAY62_12925	0.282	0	0.162	0	0.904	0.885	0	0.337	0.994
rplQ	rpmD	85581.CAY62_12825	85581.CAY62_12865	0.371	0	0	0	0.904	0.885	0	0.301	0.994
rplQ	rpmC	85581.CAY62_12825	85581.CAY62_12915	0.283	0	0	0	0.904	0.885	0	0.337	0.994
rplQ	rplR	85581.CAY62_12825	85581.CAY62_12875	0.367	0	0	0	0.904	0.885	0	0.337	0.994
rplQ	rpsN	85581.CAY62_12825	85581.CAY62_12890	0.341	0	0.194	0	0.904	0.885	0	0.203	0.994
rplQ	rplX	85581.CAY62_12825	85581.CAY62_12900	0.331	0	0	0	0.904	0.885	0	0.337	0.994
rplR	rplK	85581.CAY62_12875	85581.CAY62_00440	0.154	0	0	0	0.904	0.885	0.287	0.337	0.994
rplR	rplQ	85581.CAY62_12875	85581.CAY62_12825	0.367	0	0	0	0.904	0.885	0	0.337	0.994
rplS	rplL	85581.CAY62_11420	85581.CAY62_00455	0.043	0	0.354	0	0.904	0.885	0	0.337	0.994
rplS	rpsR	85581.CAY62_11420	85581.CAY62_00945	0	0	0.428	0	0.904	0.885	0	0.203	0.994
rplS	rpsQ	85581.CAY62_11420	85581.CAY62_12910	0	0	0.463	0	0.897	0.885	0	0.212	0.994
rplS	rplQ	85581.CAY62_11420	85581.CAY62_12825	0.051	0	0.422	0	0.904	0.885	0	0.212	0.994
rplU	rpsI	85581.CAY62_01190	85581.CAY62_12400	0.154	0	0.249	0	0.904	0.885	0	0.337	0.994
rplU	rpsP	85581.CAY62_01190	85581.CAY62_11435	0.102	0	0.228	0	0.904	0.885	0	0.337	0.994
rplW	rpsM	85581.CAY62_12945	85581.CAY62_12845	0.298	0	0	0	0.904	0.885	0	0.337	0.994
rplW	secY	85581.CAY62_12945	85581.CAY62_12855	0.37	0	0.175	0	0.904	0.885	0	0.199	0.994
rplW	rpsL	85581.CAY62_12945	85581.CAY62_12980	0.154	0	0	0	0.904	0.885	0.404	0.211	0.994
rplX	rpsB	85581.CAY62_12900	85581.CAY62_11100	0.065	0	0	0	0.904	0.885	0.357	0.337	0.994
rplX	rplQ	85581.CAY62_12900	85581.CAY62_12825	0.331	0	0	0	0.904	0.885	0	0.337	0.994
rpmA	rplL	85581.CAY62_01195	85581.CAY62_00455	0.099	0	0.247	0	0.904	0.885	0	0.337	0.994
rpmA	rpsP	85581.CAY62_01195	85581.CAY62_11435	0.101	0	0.263	0	0.904	0.885	0	0.337	0.994
rpmA	rpsI	85581.CAY62_01195	85581.CAY62_12400	0.154	0	0.289	0	0.904	0.885	0	0.337	0.994
rpmA	rplC	85581.CAY62_01195	85581.CAY62_12955	0.049	0	0.33	0	0.904	0.885	0	0.337	0.994
rpmA	rplM	85581.CAY62_01195	85581.CAY62_12405	0.154	0	0.317	0	0.904	0.885	0	0.337	0.994
rpmC	rplK	85581.CAY62_12915	85581.CAY62_00440	0.154	0	0	0	0.904	0.885	0.287	0.337	0.994
rpmC	map	85581.CAY62_12915	85581.CAY62_11105	0.154	0	0	0	0.899	0.878	0.46	0.119	0.994
rpmC	rplQ	85581.CAY62_12915	85581.CAY62_12825	0.283	0	0	0	0.904	0.885	0	0.337	0.994
rpmC	rpsD	85581.CAY62_12915	85581.CAY62_12835	0.3	0	0	0	0.904	0.885	0	0.337	0.994
rpmC	rpsM	85581.CAY62_12915	85581.CAY62_12845	0.319	0	0	0	0.904	0.885	0	0.337	0.994
rpmD	rplK	85581.CAY62_12865	85581.CAY62_00440	0.102	0	0	0	0.904	0.885	0.306	0.33	0.994
rpmD	rplQ	85581.CAY62_12865	85581.CAY62_12825	0.371	0	0	0	0.904	0.885	0	0.301	0.994
rpmG	rpsR	85581.CAY62_13495	85581.CAY62_00945	0.154	0	0.236	0	0.901	0.885	0	0.337	0.994
rpoA	rpsS	85581.CAY62_12830	85581.CAY62_12935	0.285	0	0.275	0	0.904	0.876	0	0.255	0.994
rpoA	rplN	85581.CAY62_12830	85581.CAY62_12905	0.347	0	0.614	0	0.904	0.709	0	0.337	0.994
rpoA	rplB	85581.CAY62_12830	85581.CAY62_12940	0.281	0	0.335	0	0.904	0.855	0	0.337	0.994
rpoA	rplC	85581.CAY62_12830	85581.CAY62_12955	0.276	0	0.303	0	0.904	0.852	0	0.337	0.994
rpoB	rpsG	85581.CAY62_00460	85581.CAY62_12975	0.154	0	0.639	0	0.904	0.768	0	0.337	0.994
rpoB	rpsB	85581.CAY62_00460	85581.CAY62_11100	0.075	0	0.63	0	0.866	0.742	0.455	0.337	0.994
rpoB	rpsC	85581.CAY62_00460	85581.CAY62_12925	0.154	0	0.37	0	0.904	0.853	0	0.337	0.994
rpsB	rplL	85581.CAY62_11100	85581.CAY62_00455	0.066	0	0.319	0	0.904	0.885	0	0.337	0.994
rpsB	rpoB	85581.CAY62_11100	85581.CAY62_00460	0.075	0	0.63	0	0.866	0.742	0.455	0.337	0.994
rpsB	ndk	85581.CAY62_11100	85581.CAY62_02880	0	0	0	0	0.731	0.855	0.851	0.187	0.994
rpsB	infA	85581.CAY62_11100	85581.CAY62_09120	0.073	0	0.353	0	0.748	0.885	0.579	0.337	0.994
rpsB	rplX	85581.CAY62_11100	85581.CAY62_12900	0.065	0	0	0	0.904	0.885	0.357	0.337	0.994
rpsC	rpoB	85581.CAY62_12925	85581.CAY62_00460	0.154	0	0.37	0	0.904	0.853	0	0.337	0.994
rpsC	rplQ	85581.CAY62_12925	85581.CAY62_12825	0.282	0	0.162	0	0.904	0.885	0	0.337	0.994
rpsD	rpmC	85581.CAY62_12835	85581.CAY62_12915	0.3	0	0	0	0.904	0.885	0	0.337	0.994
rpsG	rpoB	85581.CAY62_12975	85581.CAY62_00460	0.154	0	0.639	0	0.904	0.768	0	0.337	0.994
rpsG	ndk	85581.CAY62_12975	85581.CAY62_02880	0	0	0	0	0.781	0.854	0.851	0	0.994
rpsH	rplL	85581.CAY62_12885	85581.CAY62_00455	0.154	0	0.22	0	0.904	0.883	0	0.337	0.994
rpsI	rplA	85581.CAY62_12400	85581.CAY62_00445	0.054	0	0.321	0	0.904	0.885	0	0.337	0.994
rpsI	rplL	85581.CAY62_12400	85581.CAY62_00455	0	0	0.288	0	0.904	0.885	0	0.337	0.994
rpsI	rplU	85581.CAY62_12400	85581.CAY62_01190	0.154	0	0.249	0	0.904	0.885	0	0.337	0.994
rpsI	rpmA	85581.CAY62_12400	85581.CAY62_01195	0.154	0	0.289	0	0.904	0.885	0	0.337	0.994
rpsI	rpsT	85581.CAY62_12400	85581.CAY62_01970	0.096	0	0	0	0.88	0.885	0.395	0.337	0.994
rpsI	rplC	85581.CAY62_12400	85581.CAY62_12955	0.154	0	0.182	0	0.904	0.885	0	0.337	0.994
rpsI	rplB	85581.CAY62_12400	85581.CAY62_12940	0.154	0	0.23	0	0.904	0.885	0	0.337	0.994
rpsI	rplO	85581.CAY62_12400	85581.CAY62_12860	0.154	0	0.206	0	0.903	0.885	0	0.337	0.994
rpsI	rplF	85581.CAY62_12400	85581.CAY62_12880	0.154	0	0.265	0	0.902	0.885	0	0.337	0.994
rpsJ	rplK	85581.CAY62_12960	85581.CAY62_00440	0.154	0	0.269	0	0.904	0.885	0	0.337	0.994
rpsJ	rplJ	85581.CAY62_12960	85581.CAY62_00450	0.154	0	0	0	0.904	0.885	0.347	0.24	0.994
rpsJ	rplL	85581.CAY62_12960	85581.CAY62_00455	0.154	0	0.204	0	0.904	0.885	0	0.337	0.994
rpsJ	rpsR	85581.CAY62_12960	85581.CAY62_00945	0	0	0	0	0.904	0.885	0.427	0.208	0.994
rpsK	rplA	85581.CAY62_12840	85581.CAY62_00445	0.101	0	0	0	0.904	0.885	0.348	0.337	0.994
rpsL	rplL	85581.CAY62_12980	85581.CAY62_00455	0.154	0	0.289	0	0.904	0.885	0	0.337	0.994
rpsL	rplW	85581.CAY62_12980	85581.CAY62_12945	0.154	0	0	0	0.904	0.885	0.404	0.211	0.994
rpsM	rplA	85581.CAY62_12845	85581.CAY62_00445	0.101	0	0.302	0	0.904	0.885	0	0.337	0.994
rpsM	rplL	85581.CAY62_12845	85581.CAY62_00455	0.154	0	0.238	0	0.904	0.883	0	0.337	0.994
rpsM	rpmC	85581.CAY62_12845	85581.CAY62_12915	0.319	0	0	0	0.904	0.885	0	0.337	0.994
rpsM	rplW	85581.CAY62_12845	85581.CAY62_12945	0.298	0	0	0	0.904	0.885	0	0.337	0.994
rpsN	rplQ	85581.CAY62_12890	85581.CAY62_12825	0.341	0	0.194	0	0.904	0.885	0	0.203	0.994
rpsO	rplJ	85581.CAY62_02105	85581.CAY62_00450	0.064	0	0	0	0.903	0.885	0.344	0.337	0.994
rpsO	rpsU	85581.CAY62_02105	85581.CAY62_01360	0	0	0	0	0.901	0.885	0.395	0.337	0.994
rpsO	rplF	85581.CAY62_02105	85581.CAY62_12880	0	0	0.303	0	0.903	0.885	0	0.337	0.994
rpsO	rplO	85581.CAY62_02105	85581.CAY62_12860	0	0	0.387	0	0.903	0.885	0	0.337	0.994
rpsO	rplE	85581.CAY62_02105	85581.CAY62_12895	0	0	0	0	0.903	0.885	0.344	0.337	0.994
rpsO	rplB	85581.CAY62_02105	85581.CAY62_12940	0	0	0.191	0	0.885	0.885	0.304	0.337	0.994
rpsO	ndk	85581.CAY62_02105	85581.CAY62_02880	0.075	0	0	0	0.779	0.855	0.851	0	0.994
rpsO	rplC	85581.CAY62_02105	85581.CAY62_12955	0	0	0.347	0	0.902	0.885	0	0.337	0.994
rpsP	rplL	85581.CAY62_11435	85581.CAY62_00455	0	0	0.353	0	0.904	0.885	0	0.337	0.994
rpsP	rplU	85581.CAY62_11435	85581.CAY62_01190	0.102	0	0.228	0	0.904	0.885	0	0.337	0.994
rpsP	rpmA	85581.CAY62_11435	85581.CAY62_01195	0.101	0	0.263	0	0.904	0.885	0	0.337	0.994
rpsP	rplP	85581.CAY62_11435	85581.CAY62_12920	0	0	0	0	0.903	0.885	0.395	0.337	0.994
rpsP	rplQ	85581.CAY62_11435	85581.CAY62_12825	0.092	0	0.265	0	0.904	0.885	0	0.337	0.994
rpsQ	rplK	85581.CAY62_12910	85581.CAY62_00440	0.154	0	0.187	0	0.904	0.885	0	0.337	0.994
rpsQ	rplA	85581.CAY62_12910	85581.CAY62_00445	0.154	0	0.263	0	0.904	0.885	0	0.337	0.994
rpsQ	rplL	85581.CAY62_12910	85581.CAY62_00455	0.154	0	0.224	0	0.904	0.881	0	0.337	0.994
rpsQ	rplS	85581.CAY62_12910	85581.CAY62_11420	0	0	0.463	0	0.897	0.885	0	0.212	0.994
rpsR	rplS	85581.CAY62_00945	85581.CAY62_11420	0	0	0.428	0	0.904	0.885	0	0.203	0.994
rpsR	rpmG	85581.CAY62_00945	85581.CAY62_13495	0.154	0	0.236	0	0.901	0.885	0	0.337	0.994
rpsR	rpsJ	85581.CAY62_00945	85581.CAY62_12960	0	0	0	0	0.904	0.885	0.427	0.208	0.994
rpsS	rplJ	85581.CAY62_12935	85581.CAY62_00450	0.154	0	0	0	0.904	0.885	0.315	0.33	0.994
rpsS	rpoA	85581.CAY62_12935	85581.CAY62_12830	0.285	0	0.275	0	0.904	0.876	0	0.255	0.994
rpsT	rpsI	85581.CAY62_01970	85581.CAY62_12400	0.096	0	0	0	0.88	0.885	0.395	0.337	0.994
rpsU	rpsO	85581.CAY62_01360	85581.CAY62_02105	0	0	0	0	0.901	0.885	0.395	0.337	0.994
secY	rplW	85581.CAY62_12855	85581.CAY62_12945	0.37	0	0.175	0	0.904	0.885	0	0.199	0.994
ARR48841.1	sucC	85581.CAY62_04130	85581.CAY62_04160	0.365	0	0	0	0.867	0	0.9	0.337	0.993
ARR49517.1	sdhA	85581.CAY62_07980	85581.CAY62_04140	0.237	0	0	0	0.874	0	0.9	0.377	0.993
atpA	atpD	85581.CAY62_14305	85581.CAY62_14315	0.56	0	0.317	0.623	0.664	0.847	0.603	0.124	0.993
atpD	atpA	85581.CAY62_14315	85581.CAY62_14305	0.56	0	0.317	0.623	0.664	0.847	0.603	0.124	0.993
eno	gpmI	85581.CAY62_11635	85581.CAY62_13385	0.154	0	0.156	0	0.871	0.092	0.9	0.337	0.993
glyA	purH	85581.CAY62_03010	85581.CAY62_00520	0.101	0	0	0	0.899	0.092	0.9	0.337	0.993
gpmI	eno	85581.CAY62_13385	85581.CAY62_11635	0.154	0	0.156	0	0.871	0.092	0.9	0.337	0.993
infA	rplN	85581.CAY62_09120	85581.CAY62_12905	0.154	0	0.467	0	0.904	0	0.835	0.184	0.993
infA	rplV	85581.CAY62_09120	85581.CAY62_12930	0.154	0	0.502	0	0.904	0	0.834	0.189	0.993
infA	rplP	85581.CAY62_09120	85581.CAY62_12920	0.154	0	0.446	0	0.904	0.066	0.832	0.2	0.993
metG	pheS	85581.CAY62_09045	85581.CAY62_07775	0.217	0	0	0	0.854	0.853	0.445	0.381	0.993
nqrC	nqrF	85581.CAY62_03150	85581.CAY62_03165	0.732	0	0.774	0	0.06	0.851	0	0.337	0.993
nqrF	nqrC	85581.CAY62_03165	85581.CAY62_03150	0.732	0	0.774	0	0.06	0.851	0	0.337	0.993
pheS	metG	85581.CAY62_07775	85581.CAY62_09045	0.217	0	0	0	0.854	0.853	0.445	0.381	0.993
purC	purE	85581.CAY62_04945	85581.CAY62_14475	0.154	0	0	0	0.904	0	0.9	0.337	0.993
purE	purC	85581.CAY62_14475	85581.CAY62_04945	0.154	0	0	0	0.904	0	0.9	0.337	0.993
purH	glyA	85581.CAY62_00520	85581.CAY62_03010	0.101	0	0	0	0.899	0.092	0.9	0.337	0.993
rplA	rplQ	85581.CAY62_00445	85581.CAY62_12825	0.097	0	0.221	0	0.904	0.885	0	0.337	0.993
rplA	rpsO	85581.CAY62_00445	85581.CAY62_02105	0.102	0	0.174	0	0.904	0.885	0	0.337	0.993
rplA	rpmA	85581.CAY62_00445	85581.CAY62_01195	0.154	0	0.266	0	0.892	0.885	0	0.337	0.993
rplA	rplU	85581.CAY62_00445	85581.CAY62_01190	0.091	0	0.167	0	0.904	0.885	0	0.337	0.993
rplA	rpsF	85581.CAY62_00445	85581.CAY62_00935	0.066	0	0.191	0	0.904	0.885	0	0.337	0.993
rplE	rpoA	85581.CAY62_12895	85581.CAY62_12830	0.356	0	0.507	0	0.904	0.742	0	0.337	0.993
rplF	rplL	85581.CAY62_12880	85581.CAY62_00455	0.154	0	0.176	0	0.904	0.885	0	0.337	0.993
rplF	rpoB	85581.CAY62_12880	85581.CAY62_00460	0.154	0	0.165	0	0.904	0.877	0	0.337	0.993
rplI	rplK	85581.CAY62_00950	85581.CAY62_00440	0.052	0	0.17	0	0.903	0.885	0	0.337	0.993
rplI	rplQ	85581.CAY62_00950	85581.CAY62_12825	0.061	0	0.21	0	0.903	0.885	0	0.337	0.993
rplI	rpsQ	85581.CAY62_00950	85581.CAY62_12910	0	0	0.227	0	0.9	0.885	0	0.337	0.993
rplK	rpsE	85581.CAY62_00440	85581.CAY62_12870	0.154	0	0.161	0	0.904	0.885	0	0.337	0.993
rplK	rpsI	85581.CAY62_00440	85581.CAY62_12400	0.056	0	0.151	0	0.904	0.885	0	0.337	0.993
rplK	rpsC	85581.CAY62_00440	85581.CAY62_12925	0.154	0	0.178	0	0.904	0.885	0	0.337	0.993
rplK	rpsP	85581.CAY62_00440	85581.CAY62_11435	0	0	0.196	0	0.904	0.885	0	0.337	0.993
rplK	rpmA	85581.CAY62_00440	85581.CAY62_01195	0.154	0	0.209	0	0.9	0.885	0	0.337	0.993
rplK	rpsS	85581.CAY62_00440	85581.CAY62_12935	0.154	0	0.156	0	0.904	0.885	0	0.337	0.993
rplK	rplP	85581.CAY62_00440	85581.CAY62_12920	0.154	0	0	0	0.904	0.885	0.167	0.337	0.993
rplK	rpsO	85581.CAY62_00440	85581.CAY62_02105	0.102	0	0.219	0	0.904	0.885	0	0.337	0.993
rplK	rpsM	85581.CAY62_00440	85581.CAY62_12845	0.102	0	0.152	0	0.904	0.885	0	0.337	0.993
rplK	rpsB	85581.CAY62_00440	85581.CAY62_11100	0	0	0.203	0	0.904	0.885	0	0.337	0.993
rplK	rplI	85581.CAY62_00440	85581.CAY62_00950	0.052	0	0.17	0	0.903	0.885	0	0.337	0.993
rplK	rplS	85581.CAY62_00440	85581.CAY62_11420	0.102	0	0.157	0	0.904	0.885	0	0.337	0.993
rplK	rplQ	85581.CAY62_00440	85581.CAY62_12825	0.1	0	0.178	0	0.904	0.885	0	0.337	0.993
rplL	rplV	85581.CAY62_00455	85581.CAY62_12930	0.154	0	0.171	0	0.904	0.885	0	0.337	0.993
rplL	rpsD	85581.CAY62_00455	85581.CAY62_12835	0.102	0	0.176	0	0.904	0.883	0	0.337	0.993
rplL	rpsE	85581.CAY62_00455	85581.CAY62_12870	0.154	0	0.172	0	0.904	0.885	0	0.337	0.993
rplL	rplU	85581.CAY62_00455	85581.CAY62_01190	0	0	0.237	0	0.904	0.885	0	0.337	0.993
rplL	rplF	85581.CAY62_00455	85581.CAY62_12880	0.154	0	0.176	0	0.904	0.885	0	0.337	0.993
rplL	rpsO	85581.CAY62_00455	85581.CAY62_02105	0.065	0	0.235	0	0.898	0.885	0	0.337	0.993
rplL	rplR	85581.CAY62_00455	85581.CAY62_12875	0.154	0	0.24	0	0.904	0.885	0	0.211	0.993
rplM	rpsR	85581.CAY62_12405	85581.CAY62_00945	0	0	0.237	0	0.904	0.885	0	0.337	0.993
rplM	rpsP	85581.CAY62_12405	85581.CAY62_11435	0.102	0	0.15	0	0.904	0.885	0	0.337	0.993
rplM	rpsN	85581.CAY62_12405	85581.CAY62_12890	0.154	0	0	0	0.904	0.885	0.071	0.337	0.993
rplN	infA	85581.CAY62_12905	85581.CAY62_09120	0.154	0	0.467	0	0.904	0	0.835	0.184	0.993
rplO	rpmA	85581.CAY62_12860	85581.CAY62_01195	0	0	0.426	0	0.871	0.885	0	0.336	0.993
rplP	rplK	85581.CAY62_12920	85581.CAY62_00440	0.154	0	0	0	0.904	0.885	0.167	0.337	0.993
rplP	infA	85581.CAY62_12920	85581.CAY62_09120	0.154	0	0.446	0	0.904	0.066	0.832	0.2	0.993
rplQ	rplK	85581.CAY62_12825	85581.CAY62_00440	0.1	0	0.178	0	0.904	0.885	0	0.337	0.993
rplQ	rplA	85581.CAY62_12825	85581.CAY62_00445	0.097	0	0.221	0	0.904	0.885	0	0.337	0.993
rplQ	rplI	85581.CAY62_12825	85581.CAY62_00950	0.061	0	0.21	0	0.903	0.885	0	0.337	0.993
rplQ	rplU	85581.CAY62_12825	85581.CAY62_01190	0	0	0.289	0	0.902	0.885	0	0.337	0.993
rplQ	rpsI	85581.CAY62_12825	85581.CAY62_12400	0.154	0	0.16	0	0.903	0.885	0	0.337	0.993
rplQ	rpsJ	85581.CAY62_12825	85581.CAY62_12960	0.268	0	0	0	0.904	0.885	0	0.337	0.993
rplQ	rplW	85581.CAY62_12825	85581.CAY62_12945	0.272	0	0	0	0.904	0.885	0	0.337	0.993
rplQ	rpsS	85581.CAY62_12825	85581.CAY62_12935	0.277	0	0	0	0.904	0.885	0	0.336	0.993
rplQ	rpsG	85581.CAY62_12825	85581.CAY62_12975	0.154	0	0.167	0	0.904	0.885	0	0.337	0.993
rplR	rplL	85581.CAY62_12875	85581.CAY62_00455	0.154	0	0.24	0	0.904	0.885	0	0.211	0.993
rplR	rpsO	85581.CAY62_12875	85581.CAY62_02105	0	0	0.185	0	0.903	0.885	0	0.337	0.993
rplR	rpsI	85581.CAY62_12875	85581.CAY62_12400	0.154	0	0.214	0	0.89	0.885	0	0.337	0.993
rplS	rplK	85581.CAY62_11420	85581.CAY62_00440	0.102	0	0.157	0	0.904	0.885	0	0.337	0.993
rplS	rpsO	85581.CAY62_11420	85581.CAY62_02105	0.041	0	0.23	0	0.904	0.885	0	0.337	0.993
rplS	rpsB	85581.CAY62_11420	85581.CAY62_11100	0.102	0	0.155	0	0.904	0.885	0	0.337	0.993
rplS	rpsD	85581.CAY62_11420	85581.CAY62_12835	0	0	0.18	0	0.904	0.885	0	0.335	0.993
rplS	rpsG	85581.CAY62_11420	85581.CAY62_12975	0	0	0.221	0	0.904	0.885	0	0.337	0.993
rplU	rplA	85581.CAY62_01190	85581.CAY62_00445	0.091	0	0.167	0	0.904	0.885	0	0.337	0.993
rplU	rplL	85581.CAY62_01190	85581.CAY62_00455	0	0	0.237	0	0.904	0.885	0	0.337	0.993
rplU	rplQ	85581.CAY62_01190	85581.CAY62_12825	0	0	0.289	0	0.902	0.885	0	0.337	0.993
rplU	rplV	85581.CAY62_01190	85581.CAY62_12930	0	0	0.242	0	0.903	0.885	0	0.337	0.993
rplU	rpsJ	85581.CAY62_01190	85581.CAY62_12960	0	0	0.179	0	0.904	0.885	0	0.337	0.993
rplV	rplL	85581.CAY62_12930	85581.CAY62_00455	0.154	0	0.171	0	0.904	0.885	0	0.337	0.993
rplV	rplU	85581.CAY62_12930	85581.CAY62_01190	0	0	0.242	0	0.903	0.885	0	0.337	0.993
rplV	rpsO	85581.CAY62_12930	85581.CAY62_02105	0	0	0.201	0	0.904	0.885	0	0.337	0.993
rplV	infA	85581.CAY62_12930	85581.CAY62_09120	0.154	0	0.502	0	0.904	0	0.834	0.189	0.993
rplV	rpsI	85581.CAY62_12930	85581.CAY62_12400	0.154	0	0.165	0	0.903	0.885	0	0.337	0.993
rplW	rpsO	85581.CAY62_12945	85581.CAY62_02105	0	0	0.159	0	0.904	0.885	0	0.337	0.993
rplW	rplQ	85581.CAY62_12945	85581.CAY62_12825	0.272	0	0	0	0.904	0.885	0	0.337	0.993
rplX	rpsI	85581.CAY62_12900	85581.CAY62_12400	0.154	0	0.155	0	0.902	0.885	0	0.337	0.993
rpmA	rplK	85581.CAY62_01195	85581.CAY62_00440	0.154	0	0.209	0	0.9	0.885	0	0.337	0.993
rpmA	rplA	85581.CAY62_01195	85581.CAY62_00445	0.154	0	0.266	0	0.892	0.885	0	0.337	0.993
rpmA	rpsR	85581.CAY62_01195	85581.CAY62_00945	0.046	0	0.307	0	0.904	0.885	0	0.199	0.993
rpmA	rpsD	85581.CAY62_01195	85581.CAY62_12835	0.095	0	0.169	0	0.904	0.885	0	0.337	0.993
rpmA	rplO	85581.CAY62_01195	85581.CAY62_12860	0	0	0.426	0	0.871	0.885	0	0.336	0.993
rpmA	rpsG	85581.CAY62_01195	85581.CAY62_12975	0.098	0	0.184	0	0.904	0.885	0	0.337	0.993
rpmB	rpsF	85581.CAY62_13500	85581.CAY62_00935	0.074	0	0.195	0	0.903	0.885	0	0.337	0.993
rpmB	rpsR	85581.CAY62_13500	85581.CAY62_00945	0.154	0	0.22	0	0.895	0.885	0	0.337	0.993
rpmC	rpsK	85581.CAY62_12915	85581.CAY62_12840	0.312	0	0	0	0.904	0.885	0	0.211	0.993
rpmC	secY	85581.CAY62_12915	85581.CAY62_12855	0.416	0	0	0	0.904	0.885	0	0.123	0.993
rpmD	rpsB	85581.CAY62_12865	85581.CAY62_11100	0.041	0	0	0	0.904	0.885	0.356	0.224	0.993
rpoA	rplE	85581.CAY62_12830	85581.CAY62_12895	0.356	0	0.507	0	0.904	0.742	0	0.337	0.993
rpoA	rpsN	85581.CAY62_12830	85581.CAY62_12890	0.363	0	0.216	0	0.904	0.872	0	0.085	0.993
rpoA	rpsG	85581.CAY62_12830	85581.CAY62_12975	0.154	0	0.236	0	0.904	0.874	0	0.337	0.993
rpoA	rpsL	85581.CAY62_12830	85581.CAY62_12980	0.154	0	0.213	0	0.904	0.869	0	0.337	0.993
rpoB	rpsE	85581.CAY62_00460	85581.CAY62_12870	0.154	0	0.303	0	0.903	0.853	0	0.337	0.993
rpoB	rplF	85581.CAY62_00460	85581.CAY62_12880	0.154	0	0.165	0	0.904	0.877	0	0.337	0.993
rpsB	rplK	85581.CAY62_11100	85581.CAY62_00440	0	0	0.203	0	0.904	0.885	0	0.337	0.993
rpsB	rplS	85581.CAY62_11100	85581.CAY62_11420	0.102	0	0.155	0	0.904	0.885	0	0.337	0.993
rpsB	secY	85581.CAY62_11100	85581.CAY62_12855	0.046	0	0.439	0	0.89	0.863	0	0.337	0.993
rpsB	rpmD	85581.CAY62_11100	85581.CAY62_12865	0.041	0	0	0	0.904	0.885	0.356	0.224	0.993
rpsC	rplK	85581.CAY62_12925	85581.CAY62_00440	0.154	0	0.178	0	0.904	0.885	0	0.337	0.993
rpsD	rplL	85581.CAY62_12835	85581.CAY62_00455	0.102	0	0.176	0	0.904	0.883	0	0.337	0.993
rpsD	rpmA	85581.CAY62_12835	85581.CAY62_01195	0.095	0	0.169	0	0.904	0.885	0	0.337	0.993
rpsD	rplS	85581.CAY62_12835	85581.CAY62_11420	0	0	0.18	0	0.904	0.885	0	0.335	0.993
rpsE	rplK	85581.CAY62_12870	85581.CAY62_00440	0.154	0	0.161	0	0.904	0.885	0	0.337	0.993
rpsE	rplL	85581.CAY62_12870	85581.CAY62_00455	0.154	0	0.172	0	0.904	0.885	0	0.337	0.993
rpsE	rpoB	85581.CAY62_12870	85581.CAY62_00460	0.154	0	0.303	0	0.903	0.853	0	0.337	0.993
rpsF	rplA	85581.CAY62_00935	85581.CAY62_00445	0.066	0	0.191	0	0.904	0.885	0	0.337	0.993
rpsF	rpmB	85581.CAY62_00935	85581.CAY62_13500	0.074	0	0.195	0	0.903	0.885	0	0.337	0.993
rpsG	rpmA	85581.CAY62_12975	85581.CAY62_01195	0.098	0	0.184	0	0.904	0.885	0	0.337	0.993
rpsG	rplS	85581.CAY62_12975	85581.CAY62_11420	0	0	0.221	0	0.904	0.885	0	0.337	0.993
rpsG	rplQ	85581.CAY62_12975	85581.CAY62_12825	0.154	0	0.167	0	0.904	0.885	0	0.337	0.993
rpsG	rpoA	85581.CAY62_12975	85581.CAY62_12830	0.154	0	0.236	0	0.904	0.874	0	0.337	0.993
rpsG	secY	85581.CAY62_12975	85581.CAY62_12855	0.154	0	0.284	0	0.904	0.864	0	0.337	0.993
rpsI	rplK	85581.CAY62_12400	85581.CAY62_00440	0.056	0	0.151	0	0.904	0.885	0	0.337	0.993
rpsI	rplX	85581.CAY62_12400	85581.CAY62_12900	0.154	0	0.155	0	0.902	0.885	0	0.337	0.993
rpsI	rplR	85581.CAY62_12400	85581.CAY62_12875	0.154	0	0.214	0	0.89	0.885	0	0.337	0.993
rpsI	rplQ	85581.CAY62_12400	85581.CAY62_12825	0.154	0	0.16	0	0.903	0.885	0	0.337	0.993
rpsI	rplV	85581.CAY62_12400	85581.CAY62_12930	0.154	0	0.165	0	0.903	0.885	0	0.337	0.993
rpsJ	rplU	85581.CAY62_12960	85581.CAY62_01190	0	0	0.179	0	0.904	0.885	0	0.337	0.993
rpsJ	rplQ	85581.CAY62_12960	85581.CAY62_12825	0.268	0	0	0	0.904	0.885	0	0.337	0.993
rpsJ	secY	85581.CAY62_12960	85581.CAY62_12855	0.356	0	0.284	0	0.904	0.864	0	0.093	0.993
rpsK	rpmC	85581.CAY62_12840	85581.CAY62_12915	0.312	0	0	0	0.904	0.885	0	0.211	0.993
rpsL	rpoA	85581.CAY62_12980	85581.CAY62_12830	0.154	0	0.213	0	0.904	0.869	0	0.337	0.993
rpsL	secY	85581.CAY62_12980	85581.CAY62_12855	0.154	0	0.206	0	0.904	0.864	0	0.333	0.993
rpsM	rplK	85581.CAY62_12845	85581.CAY62_00440	0.102	0	0.152	0	0.904	0.885	0	0.337	0.993
rpsM	rpsR	85581.CAY62_12845	85581.CAY62_00945	0	0	0	0	0.899	0.885	0.395	0.203	0.993
rpsN	rplM	85581.CAY62_12890	85581.CAY62_12405	0.154	0	0	0	0.904	0.885	0.071	0.337	0.993
rpsN	rpoA	85581.CAY62_12890	85581.CAY62_12830	0.363	0	0.216	0	0.904	0.872	0	0.085	0.993
rpsO	rplK	85581.CAY62_02105	85581.CAY62_00440	0.102	0	0.219	0	0.904	0.885	0	0.337	0.993
rpsO	rplA	85581.CAY62_02105	85581.CAY62_00445	0.102	0	0.174	0	0.904	0.885	0	0.337	0.993
rpsO	rplL	85581.CAY62_02105	85581.CAY62_00455	0.065	0	0.235	0	0.898	0.885	0	0.337	0.993
rpsO	rplW	85581.CAY62_02105	85581.CAY62_12945	0	0	0.159	0	0.904	0.885	0	0.337	0.993
rpsO	rplV	85581.CAY62_02105	85581.CAY62_12930	0	0	0.201	0	0.904	0.885	0	0.337	0.993
rpsO	rplS	85581.CAY62_02105	85581.CAY62_11420	0.041	0	0.23	0	0.904	0.885	0	0.337	0.993
rpsO	rplR	85581.CAY62_02105	85581.CAY62_12875	0	0	0.185	0	0.903	0.885	0	0.337	0.993
rpsP	rplK	85581.CAY62_11435	85581.CAY62_00440	0	0	0.196	0	0.904	0.885	0	0.337	0.993
rpsP	rpsS	85581.CAY62_11435	85581.CAY62_12935	0	0	0	0	0.885	0.885	0.395	0.337	0.993
rpsP	rplM	85581.CAY62_11435	85581.CAY62_12405	0.102	0	0.15	0	0.904	0.885	0	0.337	0.993
rpsQ	rplI	85581.CAY62_12910	85581.CAY62_00950	0	0	0.227	0	0.9	0.885	0	0.337	0.993
rpsR	rplM	85581.CAY62_00945	85581.CAY62_12405	0	0	0.237	0	0.904	0.885	0	0.337	0.993
rpsR	rpsM	85581.CAY62_00945	85581.CAY62_12845	0	0	0	0	0.899	0.885	0.395	0.203	0.993
rpsR	rpmA	85581.CAY62_00945	85581.CAY62_01195	0.046	0	0.307	0	0.904	0.885	0	0.199	0.993
rpsR	rpmB	85581.CAY62_00945	85581.CAY62_13500	0.154	0	0.22	0	0.895	0.885	0	0.337	0.993
rpsS	rplK	85581.CAY62_12935	85581.CAY62_00440	0.154	0	0.156	0	0.904	0.885	0	0.337	0.993
rpsS	rpsP	85581.CAY62_12935	85581.CAY62_11435	0	0	0	0	0.885	0.885	0.395	0.337	0.993
rpsS	rplQ	85581.CAY62_12935	85581.CAY62_12825	0.277	0	0	0	0.904	0.885	0	0.336	0.993
sdhA	ARR49517.1	85581.CAY62_04140	85581.CAY62_07980	0.237	0	0	0	0.874	0	0.9	0.377	0.993
secY	rpsB	85581.CAY62_12855	85581.CAY62_11100	0.046	0	0.439	0	0.89	0.863	0	0.337	0.993
secY	rpmC	85581.CAY62_12855	85581.CAY62_12915	0.416	0	0	0	0.904	0.885	0	0.123	0.993
secY	rpsJ	85581.CAY62_12855	85581.CAY62_12960	0.356	0	0.284	0	0.904	0.864	0	0.093	0.993
secY	rpsG	85581.CAY62_12855	85581.CAY62_12975	0.154	0	0.284	0	0.904	0.864	0	0.337	0.993
secY	rpsL	85581.CAY62_12855	85581.CAY62_12980	0.154	0	0.206	0	0.904	0.864	0	0.333	0.993
sucC	ARR48841.1	85581.CAY62_04160	85581.CAY62_04130	0.365	0	0	0	0.867	0	0.9	0.337	0.993
ARR50197.1	aceE	85581.CAY62_12195	85581.CAY62_12205	0.475	0	0.646	0	0.353	0	0.942	0.122	0.992
ARR50334.1	rplU	85581.CAY62_12950	85581.CAY62_01190	0	0	0	0	0.904	0.885	0	0.337	0.992
ARR50334.1	rplS	85581.CAY62_12950	85581.CAY62_11420	0	0	0	0	0.904	0.885	0	0.337	0.992
aceE	ARR50197.1	85581.CAY62_12205	85581.CAY62_12195	0.475	0	0.646	0	0.353	0	0.942	0.122	0.992
argS	ileS	85581.CAY62_04215	85581.CAY62_01985	0.154	0	0	0	0.49	0.851	0.851	0.337	0.992
argS	metG	85581.CAY62_04215	85581.CAY62_09045	0.239	0	0.18	0	0.284	0.853	0.851	0.381	0.992
frr	rpsB	85581.CAY62_11085	85581.CAY62_11100	0.387	0	0.194	0	0.82	0.885	0	0.337	0.992
fusA	rpsL	85581.CAY62_08730	85581.CAY62_12980	0.095	0.181	0.523	0	0.786	0.853	0.353	0.183	0.992
fusA	rpsG	85581.CAY62_08730	85581.CAY62_12975	0.095	0.331	0.593	0	0.786	0.853	0.069	0.183	0.992
ileS	argS	85581.CAY62_01985	85581.CAY62_04215	0.154	0	0	0	0.49	0.851	0.851	0.337	0.992
ileS	metG	85581.CAY62_01985	85581.CAY62_09045	0.238	0	0	0	0.429	0.85	0.851	0.381	0.992
infA	rplX	85581.CAY62_09120	85581.CAY62_12900	0.154	0	0	0	0.904	0.27	0.834	0.322	0.992
metG	ileS	85581.CAY62_09045	85581.CAY62_01985	0.238	0	0	0	0.429	0.85	0.851	0.381	0.992
metG	argS	85581.CAY62_09045	85581.CAY62_04215	0.239	0	0.18	0	0.284	0.853	0.851	0.381	0.992
rplA	rplI	85581.CAY62_00445	85581.CAY62_00950	0.052	0	0	0	0.904	0.885	0	0.337	0.992
rplA	rpsR	85581.CAY62_00445	85581.CAY62_00945	0.07	0	0.306	0	0.904	0.885	0	0.157	0.992
rplB	rplL	85581.CAY62_12940	85581.CAY62_00455	0.154	0	0	0	0.904	0.885	0	0.337	0.992
rplB	rpsR	85581.CAY62_12940	85581.CAY62_00945	0	0	0	0	0.904	0.885	0	0.337	0.992
rplB	rplI	85581.CAY62_12940	85581.CAY62_00950	0.047	0	0	0	0.904	0.885	0	0.337	0.992
rplB	rplU	85581.CAY62_12940	85581.CAY62_01190	0	0	0	0	0.904	0.885	0	0.337	0.992
rplB	rpsA	85581.CAY62_12940	85581.CAY62_08215	0.06	0	0	0	0.903	0.863	0.208	0.337	0.992
rplC	rpsF	85581.CAY62_12955	85581.CAY62_00935	0	0	0	0	0.904	0.885	0.084	0.337	0.992
rplC	rplI	85581.CAY62_12955	85581.CAY62_00950	0.048	0	0	0	0.904	0.885	0	0.337	0.992
rplC	rplU	85581.CAY62_12955	85581.CAY62_01190	0	0	0	0	0.904	0.885	0	0.337	0.992
rplC	rpsA	85581.CAY62_12955	85581.CAY62_08215	0.061	0	0	0	0.903	0.86	0.304	0.247	0.992
rplC	rplS	85581.CAY62_12955	85581.CAY62_11420	0.057	0	0	0	0.903	0.885	0	0.337	0.992
rplE	rpsR	85581.CAY62_12895	85581.CAY62_00945	0	0	0.274	0	0.904	0.885	0	0.204	0.992
rplE	rplI	85581.CAY62_12895	85581.CAY62_00950	0	0	0	0	0.904	0.885	0	0.337	0.992
rplF	rplI	85581.CAY62_12880	85581.CAY62_00950	0.043	0	0	0	0.904	0.885	0	0.337	0.992
rplF	rplU	85581.CAY62_12880	85581.CAY62_01190	0.063	0	0	0	0.902	0.885	0	0.337	0.992
rplF	rpsP	85581.CAY62_12880	85581.CAY62_11435	0	0	0	0	0.904	0.885	0	0.337	0.992
rplI	rplA	85581.CAY62_00950	85581.CAY62_00445	0.052	0	0	0	0.904	0.885	0	0.337	0.992
rplI	rplJ	85581.CAY62_00950	85581.CAY62_00450	0	0	0	0	0.904	0.885	0	0.337	0.992
rplI	rplM	85581.CAY62_00950	85581.CAY62_12405	0	0	0	0	0.904	0.885	0	0.337	0.992
rplI	rplR	85581.CAY62_00950	85581.CAY62_12875	0.043	0	0.209	0	0.889	0.885	0	0.337	0.992
rplI	rplP	85581.CAY62_00950	85581.CAY62_12920	0.041	0	0	0	0.902	0.885	0.074	0.337	0.992
rplI	rpsH	85581.CAY62_00950	85581.CAY62_12885	0.043	0	0	0	0.904	0.885	0	0.337	0.992
rplI	rplC	85581.CAY62_00950	85581.CAY62_12955	0.048	0	0	0	0.904	0.885	0	0.337	0.992
rplI	rplF	85581.CAY62_00950	85581.CAY62_12880	0.043	0	0	0	0.904	0.885	0	0.337	0.992
rplI	rplW	85581.CAY62_00950	85581.CAY62_12945	0.048	0	0	0	0.903	0.885	0	0.337	0.992
rplI	rpsS	85581.CAY62_00950	85581.CAY62_12935	0.045	0	0	0	0.904	0.885	0	0.337	0.992
rplI	rplU	85581.CAY62_00950	85581.CAY62_01190	0.06	0	0	0	0.902	0.885	0	0.337	0.992
rplI	rpsD	85581.CAY62_00950	85581.CAY62_12835	0.102	0	0	0	0.904	0.885	0	0.337	0.992
rplI	rplE	85581.CAY62_00950	85581.CAY62_12895	0	0	0	0	0.904	0.885	0	0.337	0.992
rplI	rpsI	85581.CAY62_00950	85581.CAY62_12400	0	0	0	0	0.904	0.885	0	0.337	0.992
rplI	rplB	85581.CAY62_00950	85581.CAY62_12940	0.047	0	0	0	0.904	0.885	0	0.337	0.992
rplI	rpoA	85581.CAY62_00950	85581.CAY62_12830	0.058	0	0.304	0	0.902	0.848	0	0.333	0.992
rplJ	rpsM	85581.CAY62_00450	85581.CAY62_12845	0.102	0	0	0	0.904	0.885	0	0.337	0.992
rplJ	rplI	85581.CAY62_00450	85581.CAY62_00950	0	0	0	0	0.904	0.885	0	0.337	0.992
rplJ	rplS	85581.CAY62_00450	85581.CAY62_11420	0.052	0	0	0	0.903	0.885	0	0.337	0.992
rplJ	rplQ	85581.CAY62_00450	85581.CAY62_12825	0.101	0	0	0	0.904	0.885	0	0.337	0.992
rplJ	rpsN	85581.CAY62_00450	85581.CAY62_12890	0.154	0	0	0	0.904	0.885	0.084	0.256	0.992
rplJ	rpsI	85581.CAY62_00450	85581.CAY62_12400	0	0	0	0	0.904	0.885	0	0.337	0.992
rplJ	rplU	85581.CAY62_00450	85581.CAY62_01190	0	0	0	0	0.904	0.885	0	0.337	0.992
rplJ	rpsR	85581.CAY62_00450	85581.CAY62_00945	0	0	0	0	0.904	0.885	0	0.337	0.992
rplK	rpsF	85581.CAY62_00440	85581.CAY62_00935	0.089	0	0	0	0.904	0.885	0.084	0.337	0.992
rplK	rpsD	85581.CAY62_00440	85581.CAY62_12835	0.102	0	0	0	0.904	0.885	0	0.337	0.992
rplK	rplW	85581.CAY62_00440	85581.CAY62_12945	0.154	0	0	0	0.904	0.885	0	0.3	0.992
rplK	rplU	85581.CAY62_00440	85581.CAY62_01190	0.076	0	0	0	0.904	0.885	0	0.337	0.992
rplK	rpsH	85581.CAY62_00440	85581.CAY62_12885	0.154	0	0	0	0.904	0.885	0	0.337	0.992
rplK	rpsN	85581.CAY62_00440	85581.CAY62_12890	0.154	0	0	0	0.904	0.885	0	0.337	0.992
rplK	rpsK	85581.CAY62_00440	85581.CAY62_12840	0.102	0	0	0	0.904	0.885	0	0.337	0.992
rplL	rplB	85581.CAY62_00455	85581.CAY62_12940	0.154	0	0	0	0.904	0.885	0	0.337	0.992
rplL	rpsC	85581.CAY62_00455	85581.CAY62_12925	0.154	0	0	0	0.904	0.885	0	0.337	0.992
rplL	rpsF	85581.CAY62_00455	85581.CAY62_00935	0.053	0	0	0	0.904	0.885	0	0.337	0.992
rplL	rpmC	85581.CAY62_00455	85581.CAY62_12915	0.154	0	0	0	0.904	0.885	0	0.269	0.992
rplL	rpsS	85581.CAY62_00455	85581.CAY62_12935	0.154	0	0	0	0.904	0.883	0	0.337	0.992
rplL	rplP	85581.CAY62_00455	85581.CAY62_12920	0.154	0	0	0	0.904	0.885	0	0.337	0.992
rplL	rplX	85581.CAY62_00455	85581.CAY62_12900	0.154	0	0	0	0.904	0.885	0	0.337	0.992
rplL	rpsN	85581.CAY62_00455	85581.CAY62_12890	0.154	0	0	0	0.904	0.885	0	0.312	0.992
rplL	rpmG	85581.CAY62_00455	85581.CAY62_13495	0.154	0	0	0	0.903	0.885	0	0.337	0.992
rplL	rpsK	85581.CAY62_00455	85581.CAY62_12840	0.154	0	0	0	0.903	0.885	0	0.337	0.992
rplM	rpsF	85581.CAY62_12405	85581.CAY62_00935	0	0	0	0	0.904	0.885	0	0.337	0.992
rplM	rplI	85581.CAY62_12405	85581.CAY62_00950	0	0	0	0	0.904	0.885	0	0.337	0.992
rplM	rplU	85581.CAY62_12405	85581.CAY62_01190	0.154	0	0	0	0.904	0.885	0	0.337	0.992
rplM	rpsT	85581.CAY62_12405	85581.CAY62_01970	0.097	0	0	0	0.903	0.885	0	0.337	0.992
rplM	rplS	85581.CAY62_12405	85581.CAY62_11420	0.103	0	0	0	0.904	0.885	0	0.337	0.992
rplM	rpmG	85581.CAY62_12405	85581.CAY62_13495	0.1	0	0	0	0.902	0.885	0	0.337	0.992
rplN	rpsF	85581.CAY62_12905	85581.CAY62_00935	0	0	0	0	0.904	0.885	0	0.337	0.992
rplN	rplU	85581.CAY62_12905	85581.CAY62_01190	0.046	0	0	0	0.904	0.885	0	0.337	0.992
rplO	rpsR	85581.CAY62_12860	85581.CAY62_00945	0	0	0.304	0	0.904	0.885	0	0.193	0.992
rplP	rplL	85581.CAY62_12920	85581.CAY62_00455	0.154	0	0	0	0.904	0.885	0	0.337	0.992
rplP	rpoB	85581.CAY62_12920	85581.CAY62_00460	0.154	0	0.196	0	0.904	0.851	0	0.337	0.992
rplP	rpsF	85581.CAY62_12920	85581.CAY62_00935	0	0	0	0	0.904	0.885	0.15	0.337	0.992
rplP	rplI	85581.CAY62_12920	85581.CAY62_00950	0.041	0	0	0	0.902	0.885	0.074	0.337	0.992
rplP	rpoA	85581.CAY62_12920	85581.CAY62_12830	0.293	0	0.503	0	0.904	0.72	0	0.337	0.992
rplQ	rplJ	85581.CAY62_12825	85581.CAY62_00450	0.101	0	0	0	0.904	0.885	0	0.337	0.992
rplQ	rpsF	85581.CAY62_12825	85581.CAY62_00935	0.056	0	0	0	0.904	0.885	0	0.332	0.992
rplQ	rpsB	85581.CAY62_12825	85581.CAY62_11100	0.094	0	0	0	0.903	0.885	0	0.337	0.992
rplR	rplI	85581.CAY62_12875	85581.CAY62_00950	0.043	0	0.209	0	0.889	0.885	0	0.337	0.992
rplS	rplJ	85581.CAY62_11420	85581.CAY62_00450	0.052	0	0	0	0.903	0.885	0	0.337	0.992
rplS	rpsF	85581.CAY62_11420	85581.CAY62_00935	0	0	0	0	0.904	0.885	0	0.337	0.992
rplS	rpsI	85581.CAY62_11420	85581.CAY62_12400	0.102	0	0	0	0.903	0.885	0	0.337	0.992
rplS	rplV	85581.CAY62_11420	85581.CAY62_12930	0	0	0.208	0	0.904	0.885	0	0.209	0.992
rplS	rpmB	85581.CAY62_11420	85581.CAY62_13500	0.098	0	0	0	0.903	0.885	0	0.337	0.992
rplS	ARR50334.1	85581.CAY62_11420	85581.CAY62_12950	0	0	0	0	0.904	0.885	0	0.337	0.992
rplS	rpsJ	85581.CAY62_11420	85581.CAY62_12960	0	0	0	0	0.904	0.885	0	0.337	0.992
rplS	rpsH	85581.CAY62_11420	85581.CAY62_12885	0	0	0.413	0	0.871	0.885	0	0.212	0.992
rplS	rplC	85581.CAY62_11420	85581.CAY62_12955	0.057	0	0	0	0.903	0.885	0	0.337	0.992
rplS	rpsM	85581.CAY62_11420	85581.CAY62_12845	0.046	0	0.178	0	0.892	0.885	0	0.337	0.992
rplS	rpsK	85581.CAY62_11420	85581.CAY62_12840	0.048	0	0	0	0.904	0.885	0	0.337	0.992
rplS	rplM	85581.CAY62_11420	85581.CAY62_12405	0.103	0	0	0	0.904	0.885	0	0.337	0.992
rplU	rplK	85581.CAY62_01190	85581.CAY62_00440	0.076	0	0	0	0.904	0.885	0	0.337	0.992
rplU	rplJ	85581.CAY62_01190	85581.CAY62_00450	0	0	0	0	0.904	0.885	0	0.337	0.992
rplU	rpsF	85581.CAY62_01190	85581.CAY62_00935	0.047	0	0	0	0.904	0.885	0	0.332	0.992
rplU	rpsR	85581.CAY62_01190	85581.CAY62_00945	0.044	0	0.288	0	0.903	0.885	0	0.211	0.992
rplU	rplI	85581.CAY62_01190	85581.CAY62_00950	0.06	0	0	0	0.902	0.885	0	0.337	0.992
rplU	rplC	85581.CAY62_01190	85581.CAY62_12955	0	0	0	0	0.904	0.885	0	0.337	0.992
rplU	rpsH	85581.CAY62_01190	85581.CAY62_12885	0.061	0	0	0	0.904	0.885	0	0.337	0.992
rplU	rpsB	85581.CAY62_01190	85581.CAY62_11100	0.073	0	0	0	0.904	0.885	0	0.337	0.992
rplU	rpsG	85581.CAY62_01190	85581.CAY62_12975	0	0	0	0	0.904	0.885	0	0.337	0.992
rplU	rpsT	85581.CAY62_01190	85581.CAY62_01970	0.058	0	0	0	0.904	0.885	0	0.337	0.992
rplU	rplM	85581.CAY62_01190	85581.CAY62_12405	0.154	0	0	0	0.904	0.885	0	0.337	0.992
rplU	rplX	85581.CAY62_01190	85581.CAY62_12900	0.046	0	0	0	0.904	0.885	0	0.337	0.992
rplU	rpsK	85581.CAY62_01190	85581.CAY62_12840	0	0	0	0	0.904	0.885	0	0.337	0.992
rplU	rpmG	85581.CAY62_01190	85581.CAY62_13495	0	0	0.152	0	0.903	0.885	0	0.337	0.992
rplU	rplB	85581.CAY62_01190	85581.CAY62_12940	0	0	0	0	0.904	0.885	0	0.337	0.992
rplU	rplN	85581.CAY62_01190	85581.CAY62_12905	0.046	0	0	0	0.904	0.885	0	0.337	0.992
rplU	rpsD	85581.CAY62_01190	85581.CAY62_12835	0.058	0	0	0	0.904	0.885	0	0.337	0.992
rplU	ARR50334.1	85581.CAY62_01190	85581.CAY62_12950	0	0	0	0	0.904	0.885	0	0.337	0.992
rplU	rpmB	85581.CAY62_01190	85581.CAY62_13500	0.1	0	0	0	0.904	0.885	0	0.337	0.992
rplU	rplF	85581.CAY62_01190	85581.CAY62_12880	0.063	0	0	0	0.902	0.885	0	0.337	0.992
rplU	rplW	85581.CAY62_01190	85581.CAY62_12945	0	0	0	0	0.904	0.885	0	0.337	0.992
rplV	rpsR	85581.CAY62_12930	85581.CAY62_00945	0	0	0.266	0	0.904	0.885	0	0.2	0.992
rplV	rplS	85581.CAY62_12930	85581.CAY62_11420	0	0	0.208	0	0.904	0.885	0	0.209	0.992
rplW	rplK	85581.CAY62_12945	85581.CAY62_00440	0.154	0	0	0	0.904	0.885	0	0.3	0.992
rplW	rpsF	85581.CAY62_12945	85581.CAY62_00935	0	0	0.158	0	0.904	0.885	0	0.333	0.992
rplW	rplI	85581.CAY62_12945	85581.CAY62_00950	0.048	0	0	0	0.903	0.885	0	0.337	0.992
rplW	rplU	85581.CAY62_12945	85581.CAY62_01190	0	0	0	0	0.904	0.885	0	0.337	0.992
rplW	rpsI	85581.CAY62_12945	85581.CAY62_12400	0.154	0	0	0	0.903	0.885	0	0.337	0.992
rplX	rplL	85581.CAY62_12900	85581.CAY62_00455	0.154	0	0	0	0.904	0.885	0	0.337	0.992
rplX	rpsF	85581.CAY62_12900	85581.CAY62_00935	0	0	0.158	0	0.904	0.885	0	0.329	0.992
rplX	rplU	85581.CAY62_12900	85581.CAY62_01190	0.046	0	0	0	0.904	0.885	0	0.337	0.992
rplX	rpsO	85581.CAY62_12900	85581.CAY62_02105	0	0	0.163	0	0.901	0.885	0	0.337	0.992
rplX	infA	85581.CAY62_12900	85581.CAY62_09120	0.154	0	0	0	0.904	0.27	0.834	0.322	0.992
rplX	rpoA	85581.CAY62_12900	85581.CAY62_12830	0.35	0	0.187	0	0.904	0.853	0	0.189	0.992
rplY	rpsF	85581.CAY62_06085	85581.CAY62_00935	0.154	0	0	0	0.902	0.885	0	0.337	0.992
rplY	rpsB	85581.CAY62_06085	85581.CAY62_11100	0.062	0	0	0	0.904	0.885	0	0.337	0.992
rpmA	rpmB	85581.CAY62_01195	85581.CAY62_13500	0.099	0	0	0	0.901	0.885	0	0.337	0.992
rpmA	rpsJ	85581.CAY62_01195	85581.CAY62_12960	0.05	0	0	0	0.904	0.885	0	0.337	0.992
rpmA	rpsB	85581.CAY62_01195	85581.CAY62_11100	0.086	0	0	0	0.903	0.885	0	0.337	0.992
rpmA	rpsL	85581.CAY62_01195	85581.CAY62_12980	0.097	0	0	0	0.903	0.885	0	0.337	0.992
rpmB	rplU	85581.CAY62_13500	85581.CAY62_01190	0.1	0	0	0	0.904	0.885	0	0.337	0.992
rpmB	rpmA	85581.CAY62_13500	85581.CAY62_01195	0.099	0	0	0	0.901	0.885	0	0.337	0.992
rpmB	rpsT	85581.CAY62_13500	85581.CAY62_01970	0.098	0	0	0	0.904	0.885	0	0.337	0.992
rpmB	rpsO	85581.CAY62_13500	85581.CAY62_02105	0.102	0	0	0	0.903	0.885	0	0.337	0.992
rpmB	rplS	85581.CAY62_13500	85581.CAY62_11420	0.098	0	0	0	0.903	0.885	0	0.337	0.992
rpmC	rplL	85581.CAY62_12915	85581.CAY62_00455	0.154	0	0	0	0.904	0.885	0	0.269	0.992
rpmC	rpsB	85581.CAY62_12915	85581.CAY62_11100	0.045	0	0	0	0.904	0.885	0	0.337	0.992
rpmC	rpsG	85581.CAY62_12915	85581.CAY62_12975	0.154	0	0	0	0.904	0.885	0	0.337	0.992
rpmG	rplL	85581.CAY62_13495	85581.CAY62_00455	0.154	0	0	0	0.903	0.885	0	0.337	0.992
rpmG	rplU	85581.CAY62_13495	85581.CAY62_01190	0	0	0.152	0	0.903	0.885	0	0.337	0.992
rpmG	rpsO	85581.CAY62_13495	85581.CAY62_02105	0.081	0	0.175	0	0.892	0.885	0	0.337	0.992
rpmG	rplM	85581.CAY62_13495	85581.CAY62_12405	0.1	0	0	0	0.902	0.885	0	0.337	0.992
rpmG	rpsN	85581.CAY62_13495	85581.CAY62_12890	0.154	0	0.363	0	0.848	0.885	0	0.337	0.992
rpoA	rplI	85581.CAY62_12830	85581.CAY62_00950	0.058	0	0.304	0	0.902	0.848	0	0.333	0.992
rpoA	rplX	85581.CAY62_12830	85581.CAY62_12900	0.35	0	0.187	0	0.904	0.853	0	0.189	0.992
rpoA	rplP	85581.CAY62_12830	85581.CAY62_12920	0.293	0	0.503	0	0.904	0.72	0	0.337	0.992
rpoB	rplP	85581.CAY62_00460	85581.CAY62_12920	0.154	0	0.196	0	0.904	0.851	0	0.337	0.992
rpoB	rpsM	85581.CAY62_00460	85581.CAY62_12845	0.154	0	0.223	0	0.903	0.852	0	0.337	0.992
rpoB	rpsD	85581.CAY62_00460	85581.CAY62_12835	0.154	0	0.188	0	0.904	0.853	0	0.337	0.992
rpoC	rpsE	85581.CAY62_00465	85581.CAY62_12870	0.154	0	0.248	0	0.904	0.853	0	0.25	0.992
rpsA	rpsO	85581.CAY62_08215	85581.CAY62_02105	0.042	0	0	0	0.396	0.885	0.851	0.337	0.992
rpsA	rplB	85581.CAY62_08215	85581.CAY62_12940	0.06	0	0	0	0.903	0.863	0.208	0.337	0.992
rpsA	rpsM	85581.CAY62_08215	85581.CAY62_12845	0	0	0	0	0.879	0.88	0.462	0.205	0.992
rpsA	rplC	85581.CAY62_08215	85581.CAY62_12955	0.061	0	0	0	0.903	0.86	0.304	0.247	0.992
rpsB	rplU	85581.CAY62_11100	85581.CAY62_01190	0.073	0	0	0	0.904	0.885	0	0.337	0.992
rpsB	rpmA	85581.CAY62_11100	85581.CAY62_01195	0.086	0	0	0	0.903	0.885	0	0.337	0.992
rpsB	rplY	85581.CAY62_11100	85581.CAY62_06085	0.062	0	0	0	0.904	0.885	0	0.337	0.992
rpsB	frr	85581.CAY62_11100	85581.CAY62_11085	0.387	0	0.194	0	0.82	0.885	0	0.337	0.992
rpsB	rplQ	85581.CAY62_11100	85581.CAY62_12825	0.094	0	0	0	0.903	0.885	0	0.337	0.992
rpsB	rpmC	85581.CAY62_11100	85581.CAY62_12915	0.045	0	0	0	0.904	0.885	0	0.337	0.992
rpsC	rplL	85581.CAY62_12925	85581.CAY62_00455	0.154	0	0	0	0.904	0.885	0	0.337	0.992
rpsD	rplK	85581.CAY62_12835	85581.CAY62_00440	0.102	0	0	0	0.904	0.885	0	0.337	0.992
rpsD	rpoB	85581.CAY62_12835	85581.CAY62_00460	0.154	0	0.188	0	0.904	0.853	0	0.337	0.992
rpsD	rplI	85581.CAY62_12835	85581.CAY62_00950	0.102	0	0	0	0.904	0.885	0	0.337	0.992
[truncated: 2,870 more rows]

## Sheet: Clusters
MCODE App Results
Parameters:
Network Scoring:
Include Loops: false Degree Cutoff: 2
Cluster Finding:
Node Score Cutoff: 0.2 Haircut: true Fluff: false K-Core: 2 Max. Depth from Seed: 100
Cluster	Score (Density*#Nodes)	Nodes	Edges	Node IDs
1	54.857	57	1536	KFZ67_01325, KFZ67_13710, KFZ67_01255, KFZ67_01255, KFZ67_01255, KFZ67_01255, KFZ67_01255, KFZ67_01255, KFZ67_01255, KFZ67_01255, KFZ67_01255, KFZ67_01255, KFZ67_01255, KFZ67_01255, KFZ67_01255, KFZ67_01255, KFZ67_01255, KFZ67_01255, KFZ67_01255, KFZ67_01255, KFZ67_01255, KFZ67_01255, KFZ67_01255, KFZ67_01255, KFZ67_01255, KFZ67_01255, KFZ67_01255, KFZ67_01255, KFZ67_01255, KFZ67_01255, KFZ67_012…
2	11.308	27	147	KFZ67_12730, KFZ67_05990, KFZ67_11345, KFZ67_03960, KFZ67_09985, KFZ67_09945, KFZ67_04275, KFZ67_03145, KFZ67_01980, KFZ67_17965, KFZ67_11825, KFZ67_05195, KFZ67_10005, KFZ67_02320, KFZ67_05185, KFZ67_00840, KFZ67_10820, KFZ67_02335, KFZ67_13205, KFZ67_02535, KFZ67_04535, KFZ67_17960, KFZ67_10090, KFZ67_13575, KFZ67_09950, KFZ67_09505, KFZ67_03890
3	5.355	32	83	KFZ67_11240, KFZ67_02530, KFZ67_11925, KFZ67_05040, KFZ67_12050, KFZ67_06350, KFZ67_11090, KFZ67_05015, KFZ67_08865, KFZ67_13655, KFZ67_12230, KFZ67_10935, KFZ67_15040, KFZ67_04925, KFZ67_02250, KFZ67_11600, KFZ67_02820, KFZ67_10095, KFZ67_11175, KFZ67_11605, KFZ67_00890, KFZ67_13505, KFZ67_15090, KFZ67_02865, KFZ67_14130, KFZ67_10075, KFZ67_12540, KFZ67_13525, KFZ67_11950, KFZ67_12690, KFZ67_125…
4	4.667	7	14	KFZ67_05275, KFZ67_03770, KFZ67_03360, KFZ67_13130, KFZ67_11180, KFZ67_02060, KFZ67_16755
5	4.667	7	14	KFZ67_09665, KFZ67_09895, KFZ67_12140, KFZ67_02595, KFZ67_03505, KFZ67_06345, KFZ67_12495
6	4.5	5	9	KFZ67_14060, KFZ67_05150, KFZ67_01785, KFZ67_14065, KFZ67_14055
7	4.25	17	34	KFZ67_12890, KFZ67_07570, KFZ67_07575, KFZ67_10805, KFZ67_09960, KFZ67_02295, KFZ67_10945, KFZ67_12485, KFZ67_07285, KFZ67_02710, KFZ67_19420, KFZ67_01985, KFZ67_02395, KFZ67_17310, KFZ67_19430, KFZ67_00945, KFZ67_04945
8	4	4	6	KFZ67_15635, KFZ67_13470, KFZ67_05515, KFZ67_09970
9	4	4	6	KFZ67_11260, KFZ67_11285, KFZ67_11280, KFZ67_00560
10	4	4	6	KFZ67_13105, KFZ67_13115, KFZ67_13160, KFZ67_13165
11	3.333	4	5	KFZ67_17350, KFZ67_05280, KFZ67_17345, KFZ67_07320
12	3	3	3	KFZ67_02980, KFZ67_11810, KFZ67_17975
13	3	3	3	KFZ67_09125, KFZ67_00020, KFZ67_02585
14	3	3	3	KFZ67_15575, KFZ67_15595, KFZ67_15590
15	3	3	3	KFZ67_17025, KFZ67_08170, KFZ67_15075
16	3	3	3	KFZ67_07015, KFZ67_17580, KFZ67_04715
17	3	3	3	KFZ67_08840, KFZ67_10865, KFZ67_10870
18	3	3	3	KFZ67_12520, KFZ67_01070, KFZ67_09160
19	3	3	3	KFZ67_09725, KFZ67_00470, KFZ67_00865
20	3	3	3	KFZ67_10990, KFZ67_10965, KFZ67_10980
